# Supplementary material for: Binuclear Nickel Complexes of a New Di(hydroxyphenyl)imidazolate
Source: MDPI journal article supplement (doi:10.3390/magnetochemistry8100132), 2022-10-18

## checkCIF/PLATON report

Structure factors have been supplied for datablock(s) NiL2\_Cl

THIS REPORT IS FOR GUIDANCE ONLY. IF USED AS PART OF A REVIEW PROCEDURE FOR PUBLICATION, IT SHOULD NOT REPLACE THE EXPERTISE OF AN EXPERIENCED CRYSTALLOGRAPHIC REFEREE.

No syntax errors found.      CIF dictionary      Interpreting this report

### Datablock: NiL2\_Cl

---

Bond precision:      C-C = 0.0098 Å      Wavelength=0.71073

Cell:                      a=13.555(2)                      b=15.389(3)                      c=17.007(3)  
                              alpha=77.732(3)                      beta=70.231(3)                      gamma=81.830(3)  
Temperature:              120 K

|                        | Calculated                                                            | Reported                                             |
|------------------------|-----------------------------------------------------------------------|------------------------------------------------------|
| Volume                 | 3252.8(10)                                                            | 3253.0(9)                                            |
| Space group            | P -1                                                                  | P -1                                                 |
| Hall group             | -P 1                                                                  | -P 1                                                 |
| Moiety formula         | 2(C59 H49 N10 Ni2 O2),<br>1.5(C4 H10 O), 4(C H4 O),<br>2(Cl) [+ solve | C59 H49 N10 Ni2 O2, Cl, 2(C<br>H4 O), 0.75(C4 H10 O) |
| Sum formula            | C128 H129 Cl2 N20 Ni4 O9.50<br>[+ solvent]                            | C64 H64.50 Cl N10 Ni2 O4.75                          |
| Mr                     | 2405.18                                                               | 1202.62                                              |
| Dx, g cm <sup>-3</sup> | 1.228                                                                 | 1.228                                                |
| Z                      | 1                                                                     | 2                                                    |
| Mu (mm <sup>-1</sup> ) | 0.673                                                                 | 0.673                                                |
| F000                   | 1259.0                                                                | 1259.0                                               |
| F000'                  | 1261.04                                                               |                                                      |
| h, k, lmax             | 17, 19, 21                                                            | 17, 19, 21                                           |
| Nref                   | 14191                                                                 | 14150                                                |
| Tmin, Tmax             | 0.976, 0.987                                                          | 0.571, 0.746                                         |
| Tmin'                  | 0.935                                                                 |                                                      |

Correction method= # Reported T Limits: Tmin=0.571 Tmax=0.746  
AbsCorr = MULTISCAN

Data completeness= 0.997

Theta(max)= 26.998

R(reflections)= 0.0794( 6921)

wR2(reflections)=  
0.2189( 14150)

S = 0.955

Npar= 756

The following ALERTS were generated. Each ALERT has the format

**test-name\_ALERT\_alert-type\_alert-level.**

Click on the hyperlinks for more details of the test.

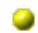

### Alert level C

RINTA01\_ALERT\_3\_C The value of Rint is greater than 0.12

Rint given 0.159

|                   |                                                  |         |              |
|-------------------|--------------------------------------------------|---------|--------------|
| PLAT020_ALERT_3_C | The Value of Rint is Greater Than 0.12 .....     | 0.159   | Report       |
| PLAT026_ALERT_3_C | Ratio Observed / Unique Reflections (too) Low .. | 49%     | Check        |
| PLAT077_ALERT_4_C | Unitcell Contains Non-integer Number of Atoms .. |         | Please Check |
| PLAT213_ALERT_2_C | Atom C20 has ADP max/min Ratio .....             | 3.4     | prolat       |
| PLAT220_ALERT_2_C | NonSolvent Resd 1 C Ueq(max)/Ueq(min) Range      | 4.4     | Ratio        |
| PLAT222_ALERT_3_C | NonSolvent Resd 1 H Uiso(max)/Uiso(min) Range    | 5.1     | Ratio        |
| PLAT234_ALERT_4_C | Large Hirshfeld Difference C52 --C53             | 0.18    | Ang.         |
| PLAT242_ALERT_2_C | Low 'MainMol' Ueq as Compared to Neighbors of    |         | C10 Check    |
| PLAT250_ALERT_2_C | Large U3/U1 Ratio for Average U(i,j) Tensor .... | 2.2     | Note         |
| PLAT260_ALERT_2_C | Large Average Ueq of Residue Including O3S       | 0.113   | Check        |
| PLAT341_ALERT_3_C | Low Bond Precision on C-C Bonds .....            | 0.00982 | Ang.         |
| PLAT905_ALERT_3_C | Negative K value in the Analysis of Variance ... | -7.535  | Report       |
| PLAT911_ALERT_3_C | Missing FCF Refl Between Thmin & STh/L= 0.600    | 14      | Report       |

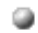

### Alert level G

|                   |                                                  |       |              |
|-------------------|--------------------------------------------------|-------|--------------|
| PLAT007_ALERT_5_G | Number of Unrefined Donor-H Atoms .....          | 2     | Report       |
| PLAT012_ALERT_1_G | No _shelx_res_checksum Found in CIF .....        |       | Please Check |
| PLAT014_ALERT_1_G | No _shelx_fab_checksum Found in CIF .....        |       | Please Check |
| PLAT042_ALERT_1_G | Calc. and Reported MoietyFormula Strings Differ  |       | Please Check |
| PLAT045_ALERT_1_G | Calculated and Reported Z Differ by a Factor ... | 0.500 | Check        |
| PLAT072_ALERT_2_G | SHELXL First Parameter in WGHT Unusually Large   | 0.10  | Report       |
| PLAT154_ALERT_1_G | The s.u.'s on the Cell Angles are Equal ..(Note) | 0.003 | Degree       |
| PLAT300_ALERT_4_G | Atom Site Occupancy of O3S Constrained at        | 0.75  | Check        |
| PLAT300_ALERT_4_G | Atom Site Occupancy of C3S Constrained at        | 0.75  | Check        |
| PLAT300_ALERT_4_G | Atom Site Occupancy of C4S Constrained at        | 0.75  | Check        |
| PLAT300_ALERT_4_G | Atom Site Occupancy of C5S Constrained at        | 0.75  | Check        |
| PLAT300_ALERT_4_G | Atom Site Occupancy of C6S Constrained at        | 0.75  | Check        |
| PLAT300_ALERT_4_G | Atom Site Occupancy of H3SA Constrained at       | 0.75  | Check        |
| PLAT300_ALERT_4_G | Atom Site Occupancy of H3SB Constrained at       | 0.75  | Check        |
| PLAT300_ALERT_4_G | Atom Site Occupancy of H4SA Constrained at       | 0.75  | Check        |
| PLAT300_ALERT_4_G | Atom Site Occupancy of H4SB Constrained at       | 0.75  | Check        |
| PLAT300_ALERT_4_G | Atom Site Occupancy of H4SC Constrained at       | 0.75  | Check        |
| PLAT300_ALERT_4_G | Atom Site Occupancy of H5SA Constrained at       | 0.75  | Check        |
| PLAT300_ALERT_4_G | Atom Site Occupancy of H5SB Constrained at       | 0.75  | Check        |
| PLAT300_ALERT_4_G | Atom Site Occupancy of H6SA Constrained at       | 0.75  | Check        |
| PLAT300_ALERT_4_G | Atom Site Occupancy of H6SB Constrained at       | 0.75  | Check        |
| PLAT300_ALERT_4_G | Atom Site Occupancy of H6SC Constrained at       | 0.75  | Check        |
| PLAT302_ALERT_4_G | Anion/Solvent/Minor-Residue Disorder (Resd 2 )   | 100%  | Note         |
| PLAT304_ALERT_4_G | Non-Integer Number of Atoms in ..... (Resd 2 )   | 11.25 | Check        |
| PLAT605_ALERT_4_G | Largest Solvent Accessible VOID in the Structure | 405   | A*3          |
| PLAT720_ALERT_4_G | Number of Unusual/Non-Standard Labels .....      | 16    | Note         |
| PLAT790_ALERT_4_G | Centre of Gravity not Within Unit Cell: Resd. #  | 4     | Note         |

```

      C H4 O
PLAT790_ALERT_4_G Centre of Gravity not Within Unit Cell: Resd. #          5 Note
      C1
PLAT794_ALERT_5_G Tentative Bond Valency for Ni1          (II)      .      2.13 Info
PLAT794_ALERT_5_G Tentative Bond Valency for Ni2          (II)      .      2.17 Info
PLAT883_ALERT_1_G No Info/Value for _atom_sites_solution_primary .      Please Do !
PLAT910_ALERT_3_G Missing # of FCF Reflection(s) Below Theta(Min).      3 Note
PLAT912_ALERT_4_G Missing # of FCF Reflections Above STh/L= 0.600      26 Note
PLAT933_ALERT_2_G Number of HKL-OMIT Records in Embedded .res File      6 Note
PLAT960_ALERT_3_G Number of Intensities with I < - 2*sig(I) ...      9 Check
PLAT967_ALERT_5_G Note: Two-Theta Cutoff Value in Embedded .res ..      54.0 Degree
PLAT978_ALERT_2_G Number C-C Bonds with Positive Residual Density.      0 Info

```

---

```

 0 ALERT level A = Most likely a serious problem - resolve or explain
 0 ALERT level B = A potentially serious problem, consider carefully
14 ALERT level C = Check. Ensure it is not caused by an omission or oversight
37 ALERT level G = General information/check it is not something unexpected

 6 ALERT type 1 CIF construction/syntax error, inconsistent or missing data
 8 ALERT type 2 Indicator that the structure model may be wrong or deficient
 9 ALERT type 3 Indicator that the structure quality may be low
24 ALERT type 4 Improvement, methodology, query or suggestion
 4 ALERT type 5 Informative message, check

```

---

It is advisable to attempt to resolve as many as possible of the alerts in all categories. Often the minor alerts point to easily fixed oversights, errors and omissions in your CIF or refinement strategy, so attention to these fine details can be worthwhile. In order to resolve some of the more serious problems it may be necessary to carry out additional measurements or structure refinements. However, the purpose of your study may justify the reported deviations and the more serious of these should normally be commented upon in the discussion or experimental section of a paper or in the "special\_details" fields of the CIF. checkCIF was carefully designed to identify outliers and unusual parameters, but every test has its limitations and alerts that are not important in a particular case may appear. Conversely, the absence of alerts does not guarantee there are no aspects of the results needing attention. It is up to the individual to critically assess their own results and, if necessary, seek expert advice.

### Publication of your CIF in IUCr journals

A basic structural check has been run on your CIF. These basic checks will be run on all CIFs submitted for publication in IUCr journals (*Acta Crystallographica*, *Journal of Applied Crystallography*, *Journal of Synchrotron Radiation*); however, if you intend to submit to *Acta Crystallographica Section C* or *E* or *IUCrData*, you should make sure that full publication checks are run on the final version of your CIF prior to submission.

### Publication of your CIF in other journals

Please refer to the *Notes for Authors* of the relevant journal for any special instructions relating to CIF submission.

PLATON version of 18/05/2022; check.def file version of 17/05/2022

Datablock NiL2\_Cl - ellipsoid plot

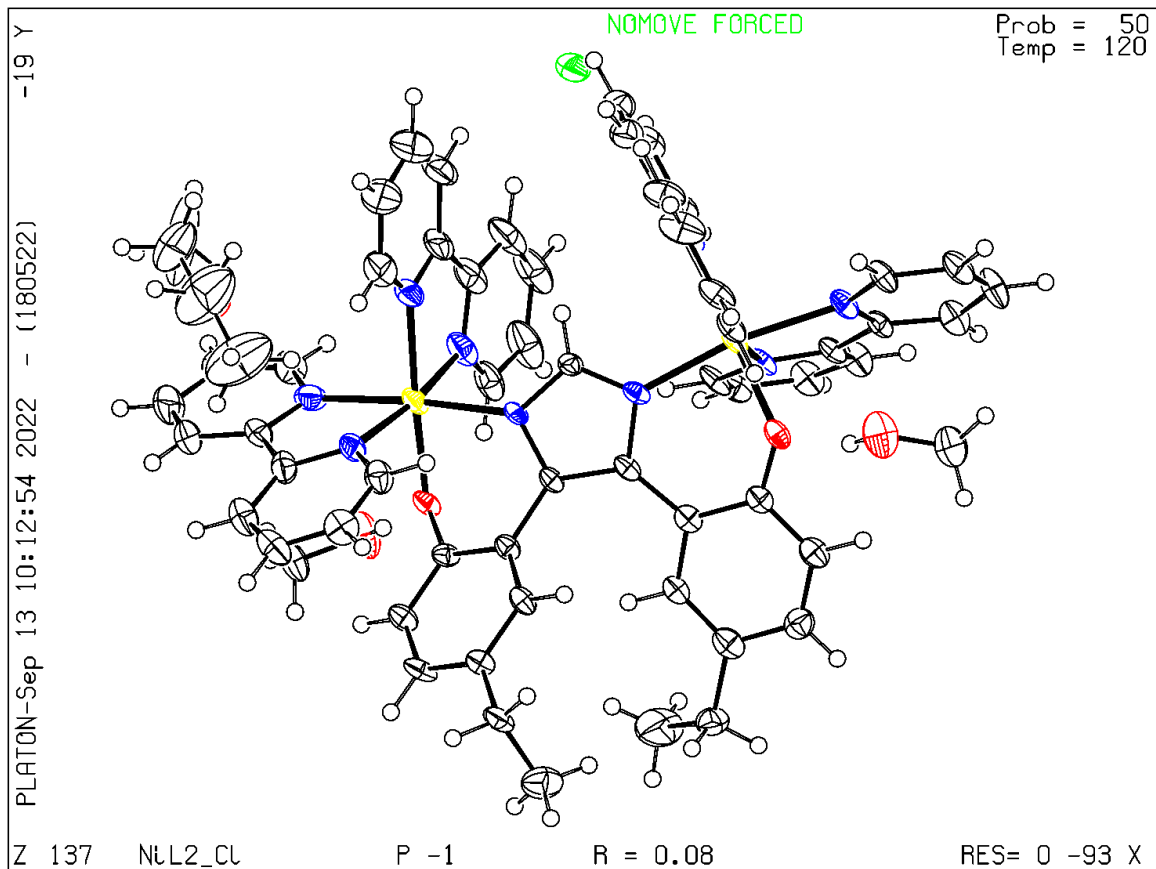

Supplement: s1 [file s1 › checkcif_[(bipy)4Ni2(L)](Cl)..pdf]
