# Supplementary material for: Binuclear Nickel Complexes of a New Di(hydroxyphenyl)imidazolate
Source: MDPI journal article supplement (doi:10.3390/magnetochemistry8100132), 2022-10-18

## checkCIF/PLATON report

Structure factors have been supplied for datablock(s) niphen

THIS REPORT IS FOR GUIDANCE ONLY. IF USED AS PART OF A REVIEW PROCEDURE FOR PUBLICATION, IT SHOULD NOT REPLACE THE EXPERTISE OF AN EXPERIENCED CRYSTALLOGRAPHIC REFEREE.

No syntax errors found.      CIF dictionary      Interpreting this report

### Datablock: niphen

---

Bond precision:      C-C = 0.0108 Å      Wavelength=0.71073

Cell:                      a=12.2327(3)                      b=13.0491(3)                      c=20.7742(5)  
                              alpha=72.935(1)                      beta=77.210(1)                      gamma=89.982(1)  
Temperature:              100 K

|                        | Calculated                                    | Reported                          |
|------------------------|-----------------------------------------------|-----------------------------------|
| Volume                 | 3084.00(13)                                   | 3084.00(13)                       |
| Space group            | P -1                                          | P -1                              |
| Hall group             | -P 1                                          | -P 1                              |
| Moiety formula         | C67 H49 N10 Ni2 O2, 3(C H4 O), Cl [+ solvent] | C67 H49 N10 Ni2 O2, Cl, 3(C H4 O) |
| Sum formula            | C70 H61 Cl N10 Ni2 O5 [+ solvent]             | C70 H61 Cl N10 Ni2 O5             |
| Mr                     | 1275.12                                       | 1275.15                           |
| Dx, g cm <sup>-3</sup> | 1.373                                         | 1.373                             |
| Z                      | 2                                             | 2                                 |
| Mu (mm <sup>-1</sup> ) | 0.715                                         | 0.715                             |
| F000                   | 1328.0                                        | 1328.0                            |
| F000'                  | 1330.07                                       |                                   |
| h, k, lmax             | 14, 15, 24                                    | 14, 15, 24                        |
| Nref                   | 10872                                         | 10859                             |
| Tmin, Tmax             | 0.830, 0.867                                  | 0.209, 0.266                      |
| Tmin'                  | 0.830                                         |                                   |

Correction method= # Reported T Limits: Tmin=0.209 Tmax=0.266

AbsCorr = MULTII-SCAN

Data completeness= 0.999

Theta(max)= 24.999

R(reflections)= 0.0811( 5967)

wR2(reflections)=  
0.2702( 10859)

S = 1.100

Npar= 811

---

The following ALERTS were generated. Each ALERT has the format

**test-name\_ALERT\_alert-type\_alert-level.**

Click on the hyperlinks for more details of the test.

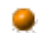

#### Alert level B

RINTA01\_ALERT\_3\_B The value of Rint is greater than 0.18

Rint given 0.199

**Author Response: The best available crystal was too small and had low reflective power.**

PLAT020\_ALERT\_3\_B The Value of Rint is Greater Than 0.12 ..... 0.199 Report

**Author Response: The best available crystal was too small and had low reflective power.**

PLAT094\_ALERT\_2\_B Ratio of Maximum / Minimum Residual Density .... 5.08 Report

**Author Response: The chlorine anion is disordered in two positions, that are too close to resolve it correctly.**

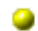

#### Alert level C

DIFMX02\_ALERT\_1\_C The maximum difference density is > 0.1\*ZMAX\*0.75

The relevant atom site should be identified.

|                   |                                                  |              |
|-------------------|--------------------------------------------------|--------------|
| PLAT018_ALERT_1_C | _diffn_measured_fraction_theta_max .NE. *_full   | ! Check      |
| PLAT084_ALERT_3_C | High wR2 Value (i.e. > 0.25) .....               | 0.27 Report  |
| PLAT234_ALERT_4_C | Large Hirshfeld Difference C57 --C58 .           | 0.16 Ang.    |
| PLAT234_ALERT_4_C | Large Hirshfeld Difference C60 --C61 .           | 0.16 Ang.    |
| PLAT341_ALERT_3_C | Low Bond Precision on C-C Bonds .....            | 0.0108 Ang.  |
| PLAT355_ALERT_3_C | Long O-H (X0.82,N0.98A) O1S - H1S .              | 1.04 Ang.    |
| PLAT355_ALERT_3_C | Long O-H (X0.82,N0.98A) O2S - H2S .              | 1.02 Ang.    |
| PLAT355_ALERT_3_C | Long O-H (X0.82,N0.98A) O3S - H3S .              | 1.02 Ang.    |
| PLAT414_ALERT_2_C | Short Intra D-H..H-X H1S ..H1SC .                | 1.99 Ang.    |
|                   | x,y,z = 1_555                                    | Check        |
| PLAT906_ALERT_3_C | Large K Value in the Analysis of Variance .....  | 15.944 Check |
| PLAT906_ALERT_3_C | Large K Value in the Analysis of Variance .....  | 3.807 Check  |
| PLAT906_ALERT_3_C | Large K Value in the Analysis of Variance .....  | 2.134 Check  |
| PLAT910_ALERT_3_C | Missing # of FCF Reflection(s) Below Theta(Min). | 5 Note       |
| PLAT911_ALERT_3_C | Missing FCF Refl Between Thmin & STh/L= 0.595    | 9 Report     |
| PLAT971_ALERT_2_C | Check Calcd Resid. Dens. 0.27Ang From Cl03       | 2.24 eA-3    |

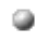

#### Alert level G

PLAT002\_ALERT\_2\_G Number of Distance or Angle Restraints on AtSite 8 Note

PLAT003\_ALERT\_2\_G Number of Uiso or Uij Restrained non-H Atoms ... 1 Report

|                   |                                                      |       |              |
|-------------------|------------------------------------------------------|-------|--------------|
| PLAT007_ALERT_5_G | Number of Unrefined Donor-H Atoms .....              | 3     | Report       |
| PLAT012_ALERT_1_G | No        _shelx_res_checksum Found in CIF .....     |       | Please Check |
| PLAT014_ALERT_1_G | No        _shelx_fab_checksum Found in CIF .....     |       | Please Check |
| PLAT042_ALERT_1_G | Calc. and Reported MoietyFormula Strings Differ      |       | Please Check |
| PLAT072_ALERT_2_G | SHELXL First Parameter in WGHT Unusually Large       | 0.16  | Report       |
| PLAT154_ALERT_1_G | The s.u.'s on the Cell Angles are Equal ..(Note)     | 0.001 | Degree       |
| PLAT171_ALERT_4_G | The CIF-Embedded .res File Contains EADP Records     | 3     | Report       |
| PLAT176_ALERT_4_G | The CIF-Embedded .res File Contains SADI Records     | 3     | Report       |
| PLAT186_ALERT_4_G | The CIF-Embedded .res File Contains ISOR Records     | 1     | Report       |
| PLAT301_ALERT_3_G | Main Residue Disorder .....(Resd 1 )                 | 4%    | Note         |
| PLAT432_ALERT_2_G | Short Inter X...Y Contact    C22    ..C22    .       | 3.16  | Ang.         |
|                   | 1-x,1-y,1-z =                                        | 2_666 | Check        |
| PLAT605_ALERT_4_G | Largest Solvent Accessible VOID in the Structure     | 232   | A**3         |
| PLAT720_ALERT_4_G | Number of Unusual/Non-Standard Labels .....          | 12    | Note         |
| PLAT794_ALERT_5_G | Tentative Bond Valency for Ni01        (II)        . | 2.11  | Info         |
| PLAT794_ALERT_5_G | Tentative Bond Valency for Ni02        (II)        . | 2.09  | Info         |
| PLAT860_ALERT_3_G | Number of Least-Squares Restraints .....             | 9     | Note         |
| PLAT883_ALERT_1_G | No Info/Value for _atom_sites_solution_primary .     |       | Please Do !  |
| PLAT909_ALERT_3_G | Percentage of I>2sig(I) Data at Theta(Max) Still     | 33%   | Note         |
| PLAT933_ALERT_2_G | Number of HKL-OMIT Records in Embedded .res File     | 2     | Note         |
| PLAT960_ALERT_3_G | Number of Intensities with I <    - 2*sig(I) ...     | 4     | Check        |
| PLAT967_ALERT_5_G | Note: Two-Theta Cutoff Value in Embedded .res ..     | 50.0  | Degree       |
| PLAT978_ALERT_2_G | Number C-C Bonds with Positive Residual Density.     | 0     | Info         |

---

0 **ALERT level A** = Most likely a serious problem - resolve or explain  
 3 **ALERT level B** = A potentially serious problem, consider carefully  
 16 **ALERT level C** = Check. Ensure it is not caused by an omission or oversight  
 24 **ALERT level G** = General information/check it is not something unexpected

7 ALERT type 1 CIF construction/syntax error, inconsistent or missing data  
 9 ALERT type 2 Indicator that the structure model may be wrong or deficient  
 16 ALERT type 3 Indicator that the structure quality may be low  
 7 ALERT type 4 Improvement, methodology, query or suggestion  
 4 ALERT type 5 Informative message, check

---

It is advisable to attempt to resolve as many as possible of the alerts in all categories. Often the minor alerts point to easily fixed oversights, errors and omissions in your CIF or refinement strategy, so attention to these fine details can be worthwhile. In order to resolve some of the more serious problems it may be necessary to carry out additional measurements or structure refinements. However, the purpose of your study may justify the reported deviations and the more serious of these should normally be commented upon in the discussion or experimental section of a paper or in the "special\_details" fields of the CIF. checkCIF was carefully designed to identify outliers and unusual parameters, but every test has its limitations and alerts that are not important in a particular case may appear. Conversely, the absence of alerts does not guarantee there are no aspects of the results needing attention. It is up to the individual to critically assess their own results and, if necessary, seek expert advice.

### **Publication of your CIF in IUCr journals**

A basic structural check has been run on your CIF. These basic checks will be run on all CIFs submitted for publication in IUCr journals (*Acta Crystallographica*, *Journal of Applied Crystallography*, *Journal of Synchrotron Radiation*); however, if you intend to submit to *Acta Crystallographica Section C* or *E* or *IUCrData*, you should make sure that full publication checks are run on the final version of your CIF prior to submission.

### **Publication of your CIF in other journals**

Please refer to the *Notes for Authors* of the relevant journal for any special instructions relating to CIF submission.

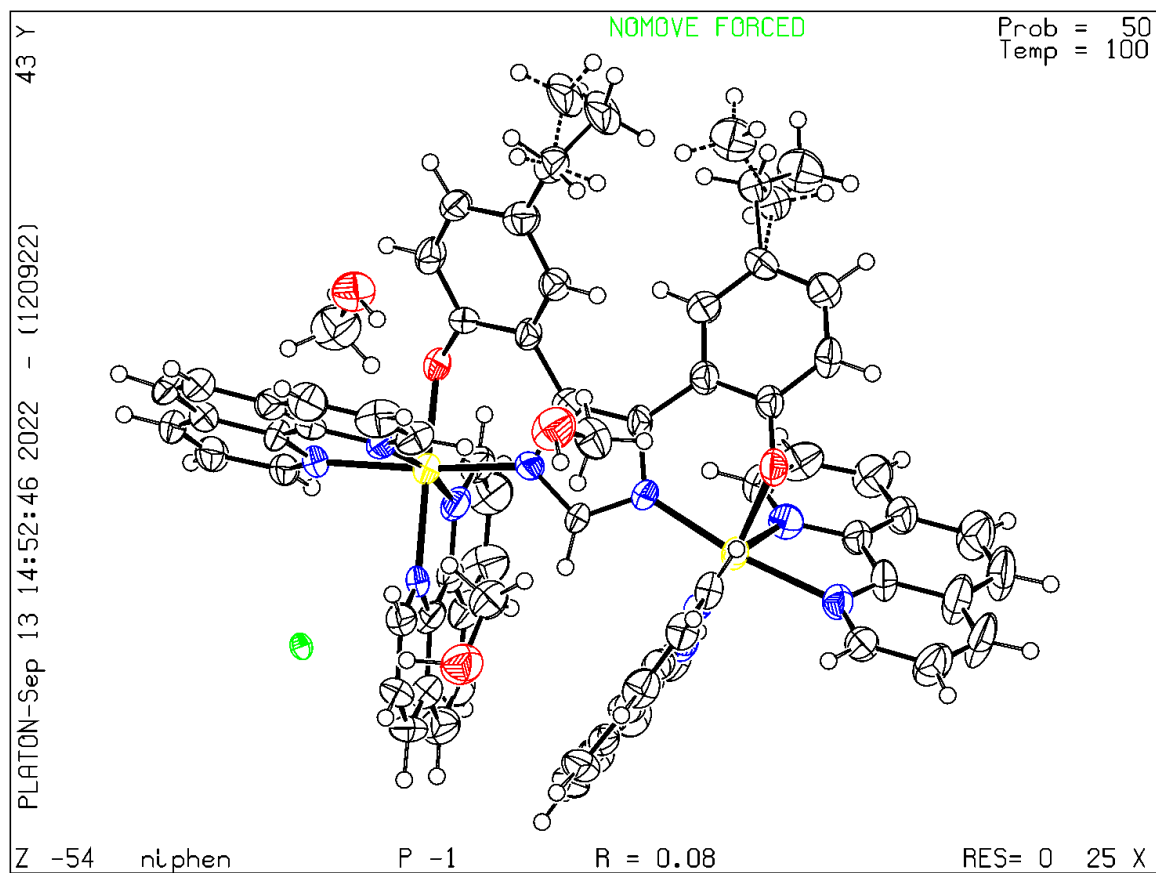

Supplement: s1 [file s1 › checkcif_[(phen)4Ni2(L)](Cl).pdf]
