# Supplementary material for: Binuclear Nickel Complexes of a New Di(hydroxyphenyl)imidazolate
Source: MDPI journal article supplement (doi:10.3390/magnetochemistry8100132), 2022-10-18

# Supporting Information

## ***Binuclear nickel complexes of a new di(hydroxyphenyl)imidazolate***

Igor A. Nikovskiy,<sup>ab</sup> Kseniia M. Karnauh<sup>c</sup>, Dmitry Yu. Aleshin,<sup>a</sup> Kirill A. Spiridonov<sup>ad</sup>, Anastasia A. Danshina<sup>ae</sup>, Yulia V. Nelyubina,<sup>ab</sup> Alexander V. Polezhaev,<sup>ab</sup> Valentin V. Novikov<sup>\*ae</sup>.

<sup>a</sup>Nesmeyanov Institute of Organoelement Compounds, Russian Academy of Sciences, 119991, Vavilova Str., 28, Moscow, Russia, e-mail: novikov84@ineos.ac.ru

<sup>b</sup>Bauman Moscow State Technical University, 105005, 2nd Baumanskaya Str., 5, Moscow, Russia

<sup>c</sup>University of California, Santa Barbara, Santa Barbara-Isla Vista, California, 93106, United States

<sup>d</sup>Lomonosov Moscow State University, 119991, Leninskiye Gory, 1-3, Moscow, Russia

<sup>e</sup>Moscow Institute of Physics and Technology (National Research University), 141700, Institutskiy per., 9, Dolgoprudny, Moscow Region, Russia

| <b>Table</b>                                                                                                                                                     | <b>Page number</b> |
|------------------------------------------------------------------------------------------------------------------------------------------------------------------|--------------------|
| <b>S1.</b> $^1\text{H}$ and $^{13}\text{C}$ NMR spectra of 1,2-bis(5-ethyl-2-hydroxyphenyl)ethane-1,2-dione.                                                     | 3                  |
| <b>S2.</b> $^1\text{H}$ spectra of 1,2-bis(5-ethyl-2-methoxyphenyl)ethane-1,2-dione.                                                                             | 4                  |
| <b>S3.</b> $^1\text{H}$ and $^{13}\text{C}$ NMR spectra of 4,5-bis(5-ethyl-2-methoxyphenyl)-1H-imidazole.                                                        | 5                  |
| <b>S4.</b> $^1\text{H}$ and $^{13}\text{C}$ NMR spectra of 2,2'-(1H-imidazole-4,5-diyl)bis(4-ethylphenol)( <b>L</b> ).                                           | 6                  |
| <b>S5.</b> $^1\text{H}$ spectra of $[(\text{bipy})_4\text{Ni}_2(\text{L})](\text{Cl})$ .                                                                         | 7                  |
| <b>S6.</b> $^1\text{H}$ spectra of $[(\text{phen})_4\text{Ni}_2(\text{L})](\text{Cl})$                                                                           | 7                  |
| <b>S7.</b> Variable-temperature magnetic susceptibility for a methanol solution of $[(\text{phen})_4\text{Ni}_2(\text{L})](\text{Cl})$ from the Evans technique. |                    |
| <b>S8.</b> $\alpha$ -LUMO orbital (0.03 isosurface level) for $[(\text{bipy})_4\text{Ni}_2(\text{L})]^+$ ( $E^{\text{LUMO}} = -0.0887$ a.u.)                     | 8                  |
| <b>S9.</b> $\alpha$ -LUMO orbital (0.03 isosurface level) for $[(\text{bipy})_4\text{Ni}_2(\text{L})]^{2+}$ ( $E^{\text{LUMO}} = -0.1007$ a. u.)                 | 8                  |
| <b>S10.</b> $\alpha$ -HOMO orbital (0.03 isosurface level) for $[(\text{phen})_4\text{Ni}_2(\text{L})]^{2+}$ ( $E^{\text{HOMO}} = -0.1976$ a.u.)                 | 9                  |
| <b>S11.</b> $\alpha$ -LUMO orbital (0.03 isosurface level) for $[(\text{phen})_4\text{Ni}_2(\text{L})]^{2+}$ ( $E^{\text{LUMO}} = -0.1008$ a.u.)                 | 9                  |
| <b>S12.</b> Spin density (0.0065 isosurface level) for $[(\text{phen})_4\text{Ni}_2(\text{L})]^{2+}$                                                             | 10                 |

**S1.**  $^1\text{H}$  (top) and  $^{13}\text{C}$  NMR (bottom) spectra of 1,2-bis(5-ethyl-2-hydroxyphenyl)ethane-1,2-dione.

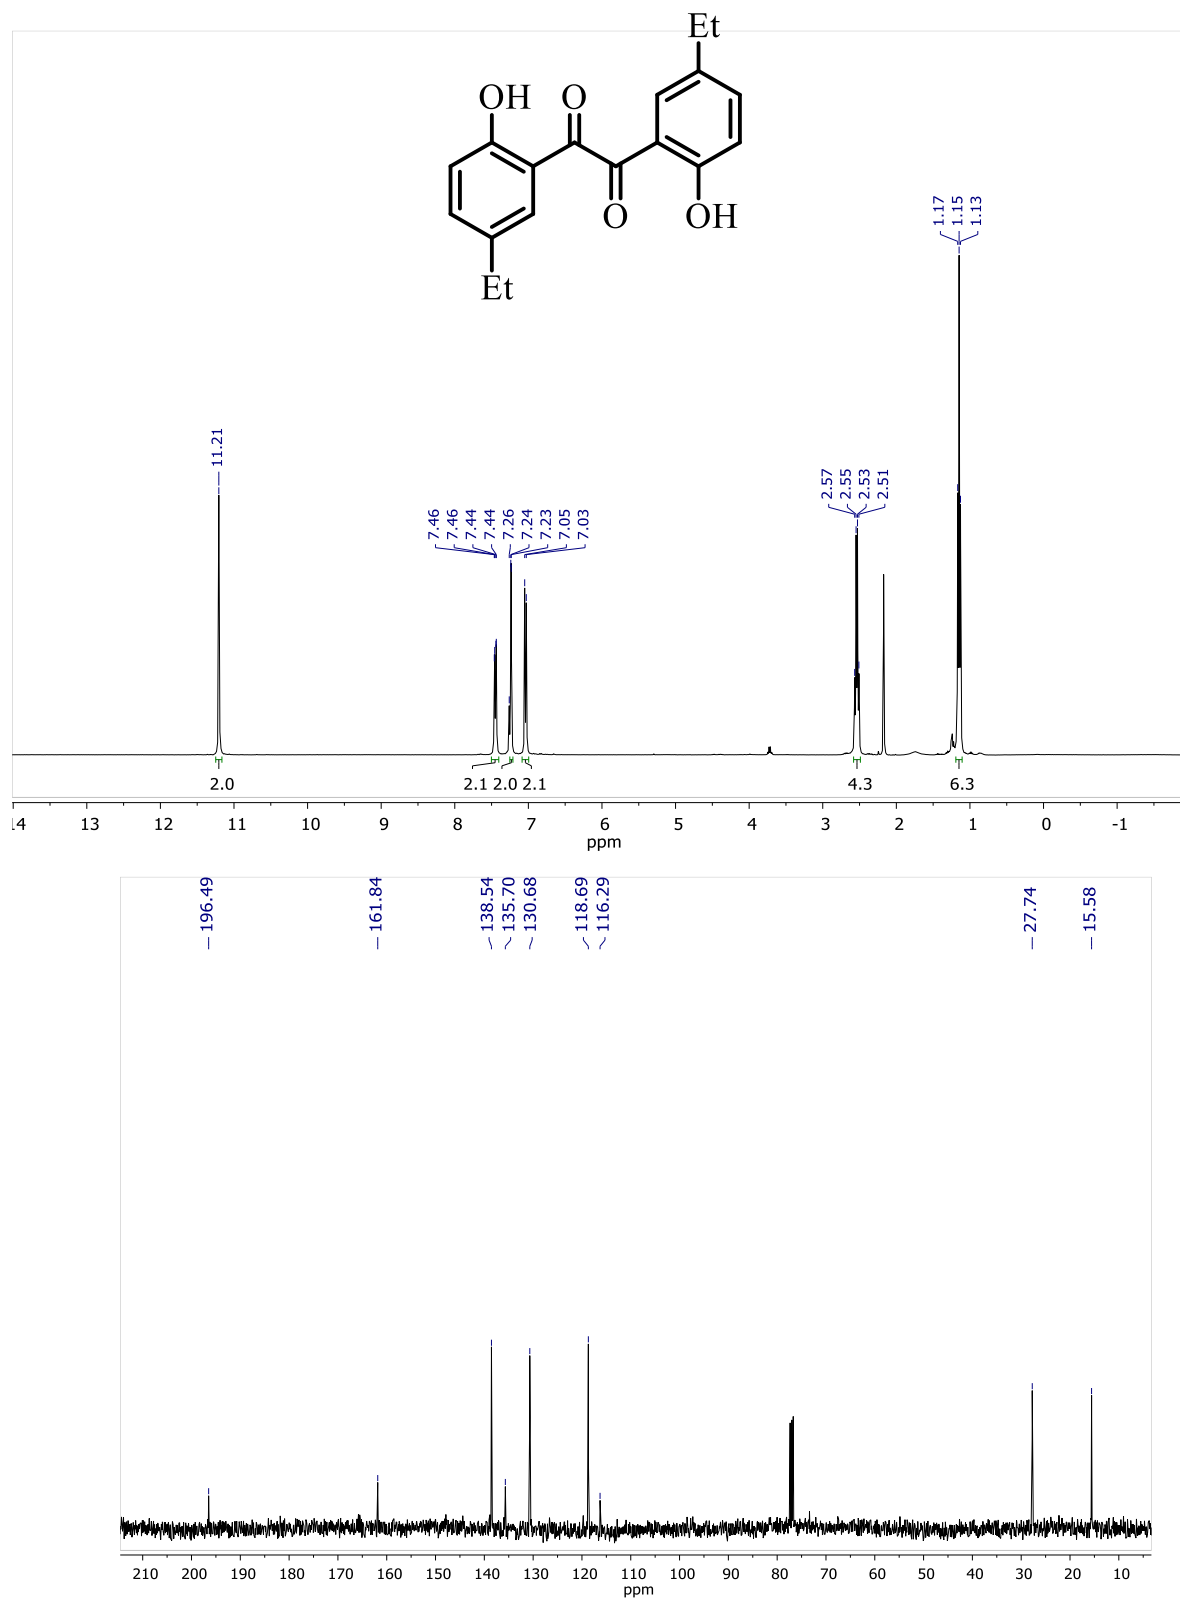

**S2.**  $^1\text{H}$  spectra of 1,2-bis(5-ethyl-2-methoxyphenyl)ethane-1,2-dione.

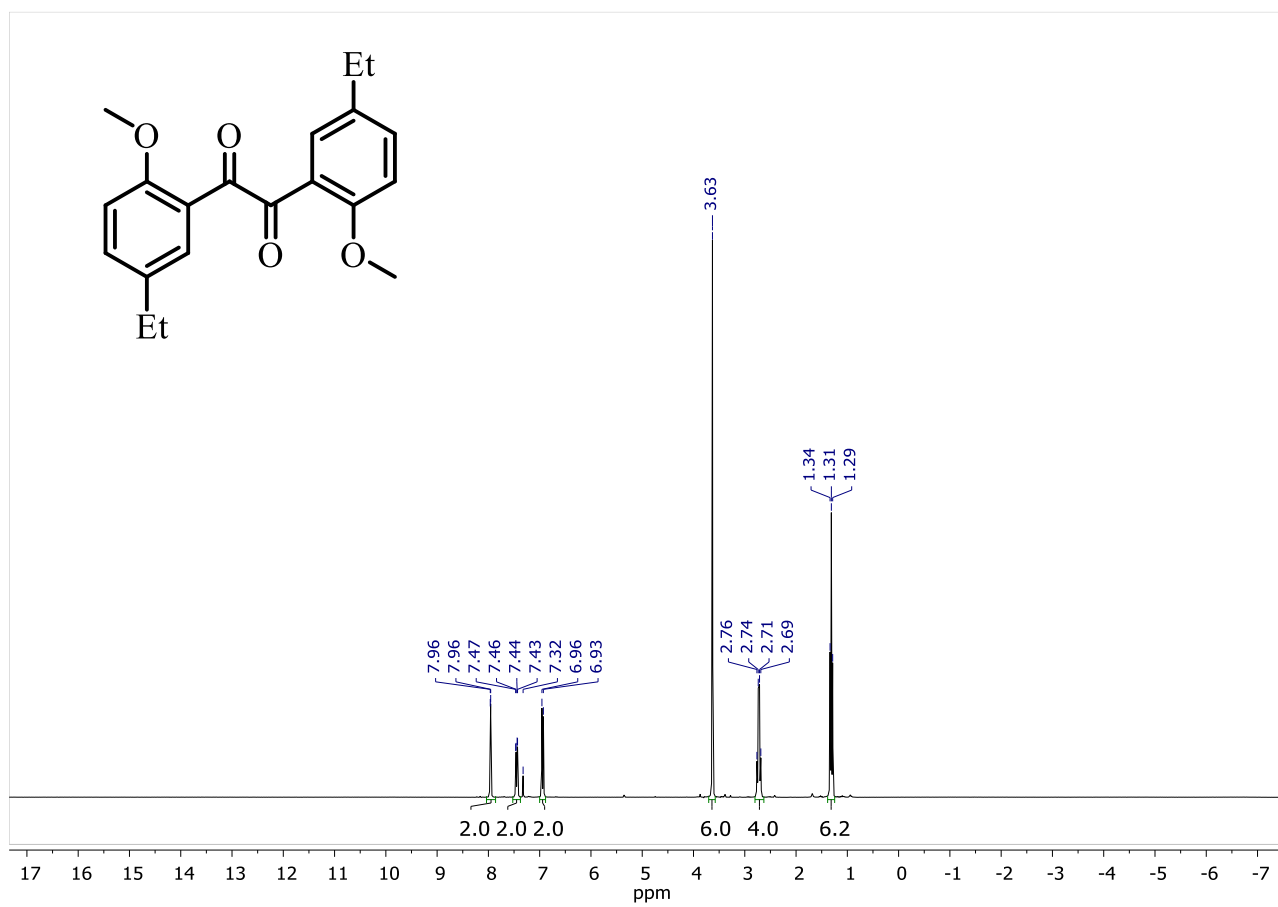

**S3.**  $^1\text{H}$  (top) and  $^{13}\text{C}$  NMR (bottom) spectra of 4,5-bis(5-ethyl-2-methoxyphenyl)-1H-imidazole.

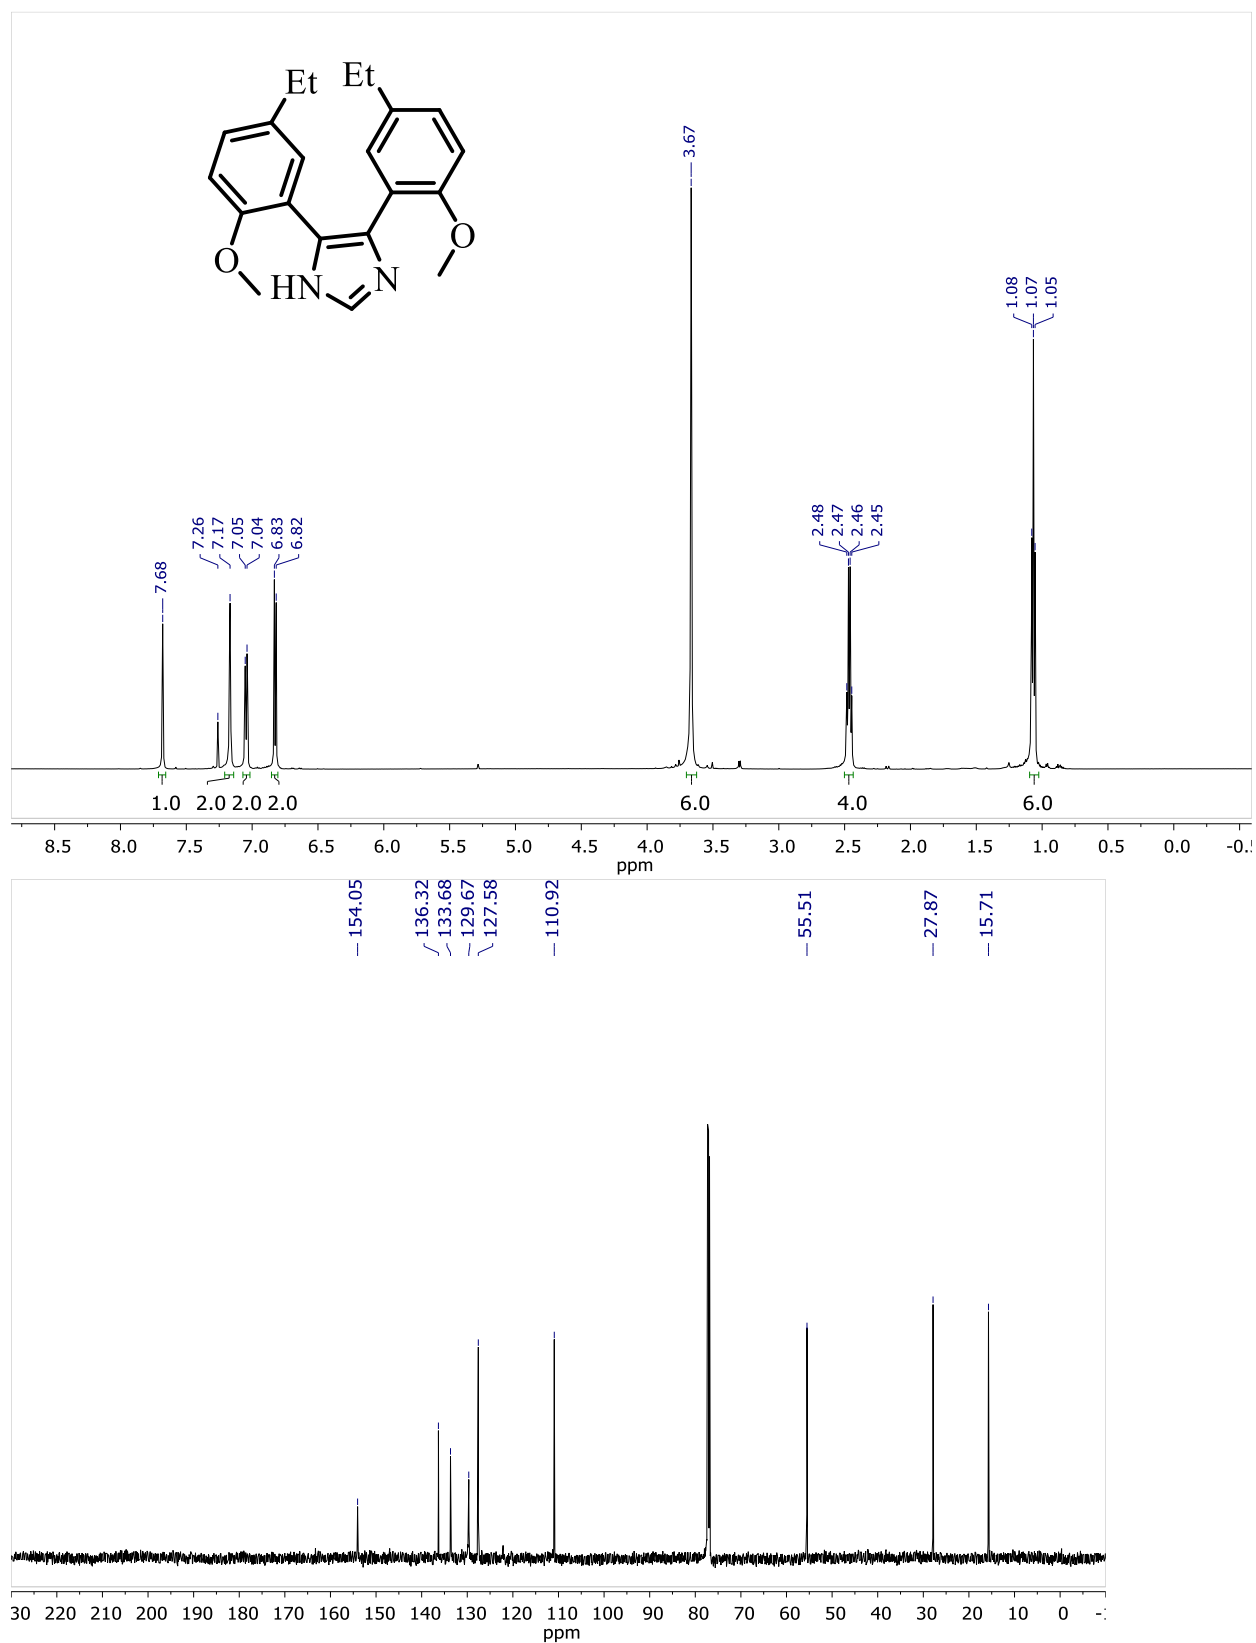

**S4.**  $^1\text{H}$  (top) and  $^{13}\text{C}$  NMR (bottom) spectra of 2,2'-(1H-imidazole-4,5-diyl)bis(4-ethylphenol)(L).

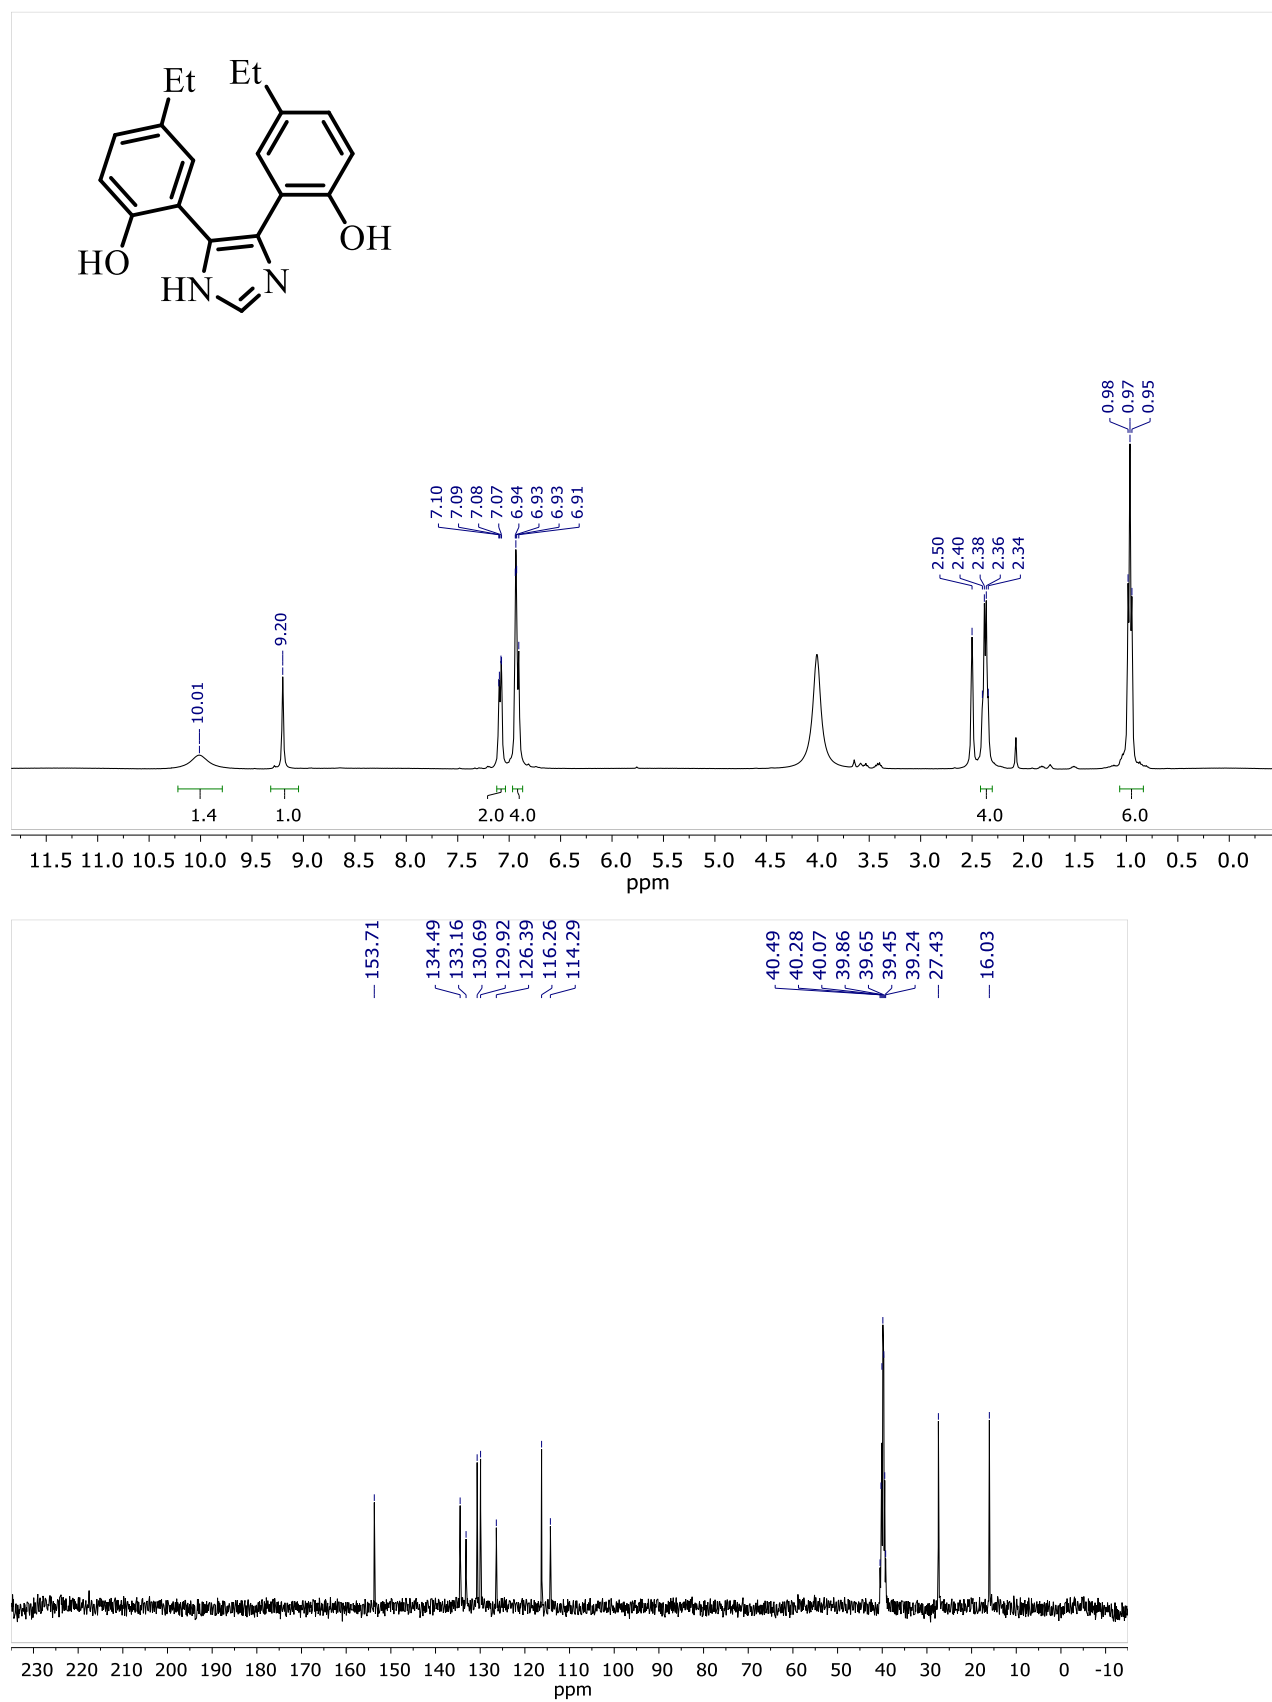

**S5.  $^1\text{H}$  NMR spectra of  $[(\text{bipy})_4\text{Ni}_2(\text{L})](\text{Cl})$ .**

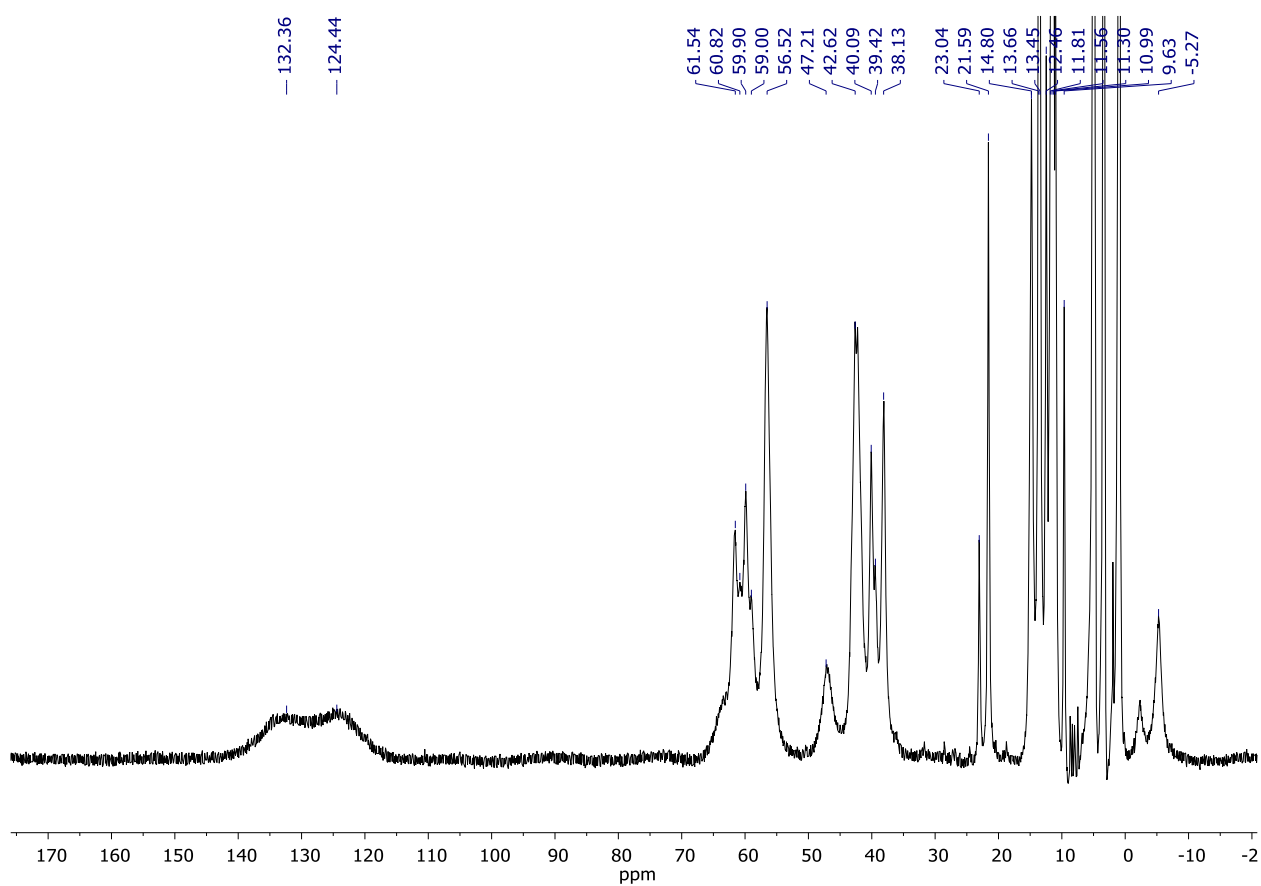

**S6.  $^1\text{H}$  NMR spectra of  $[(\text{phen})_4\text{Ni}_2(\text{L})](\text{Cl})$**

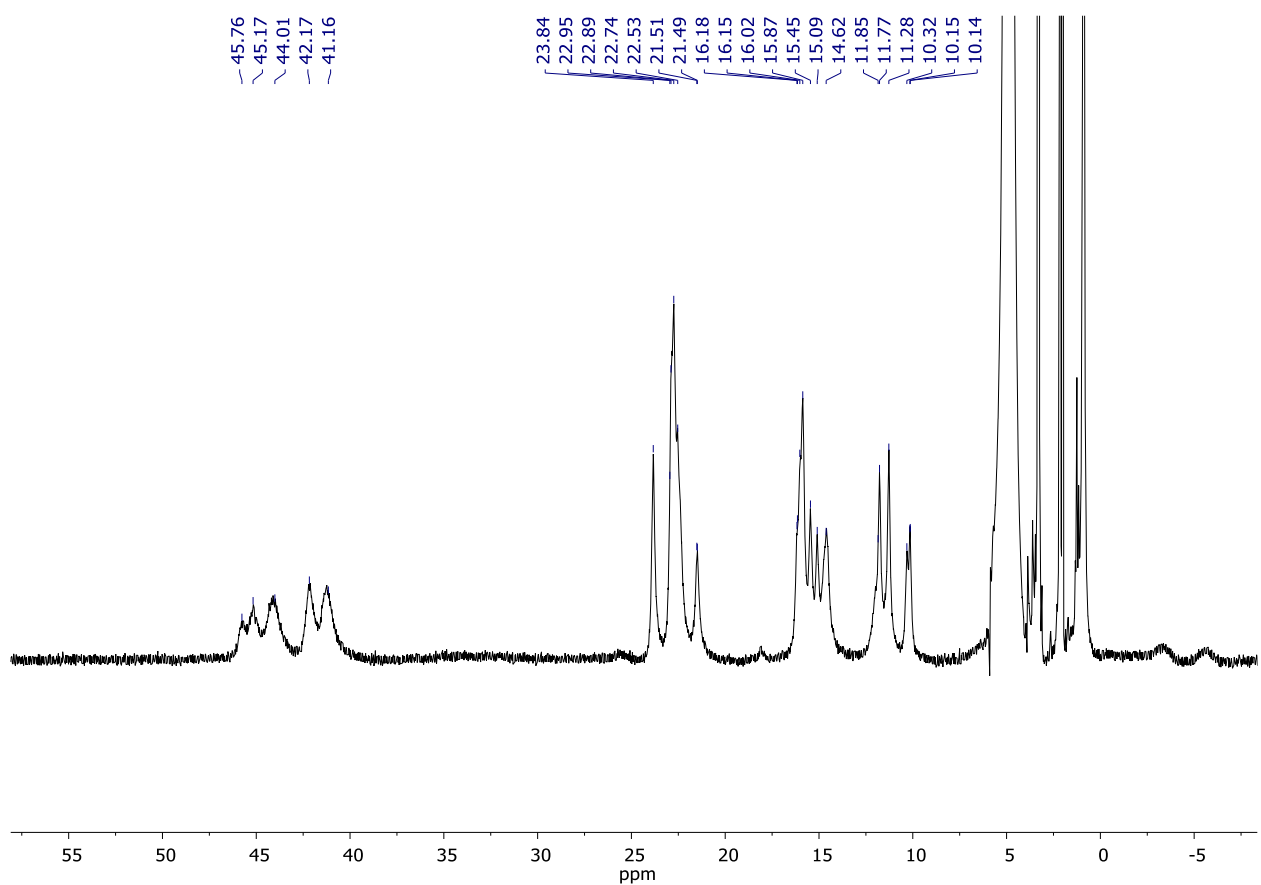

**S7.** Variable-temperature magnetic susceptibility for a methanol solution of **[(phen)<sub>4</sub>Ni<sub>2</sub>(L)](Cl)** from the Evans technique.

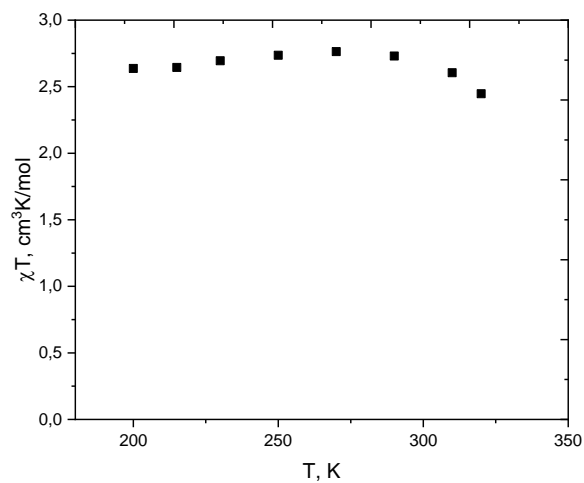

**S8.** α-LUMO orbital (0.03 isosurface level) for [(bipy)<sub>4</sub>Ni<sub>2</sub>(L)]<sup>+</sup> ( $E^{\text{LUMO}} = -0.0887$  a.u.)

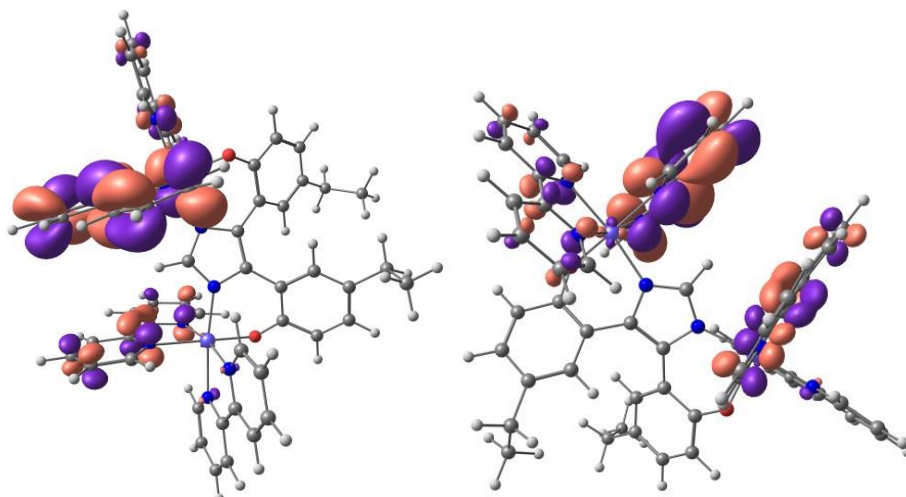

**S9.** α-LUMO orbital (0.03 isosurface level) for [(bipy)<sub>4</sub>Ni<sub>2</sub>(L)]<sup>2+</sup> ( $E^{\text{LUMO}} = -0.1007$  a. u.)

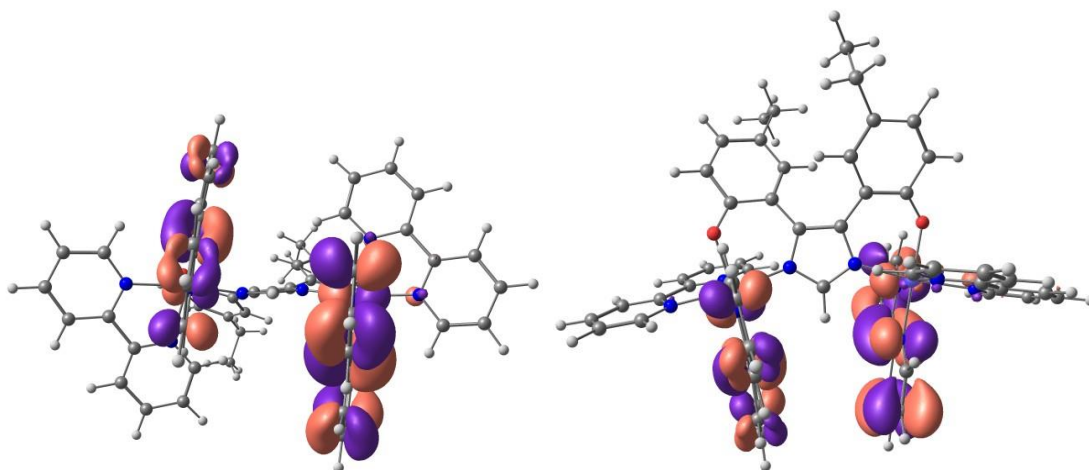

**S10.**  $\alpha$ -HOMO orbital (0.03 isosurface level) for  $[(\text{phen})_4\text{Ni}_2(\text{L})]^{2+}$  ( $E^{\text{HOMO}} = -0.1976$  a.u.)

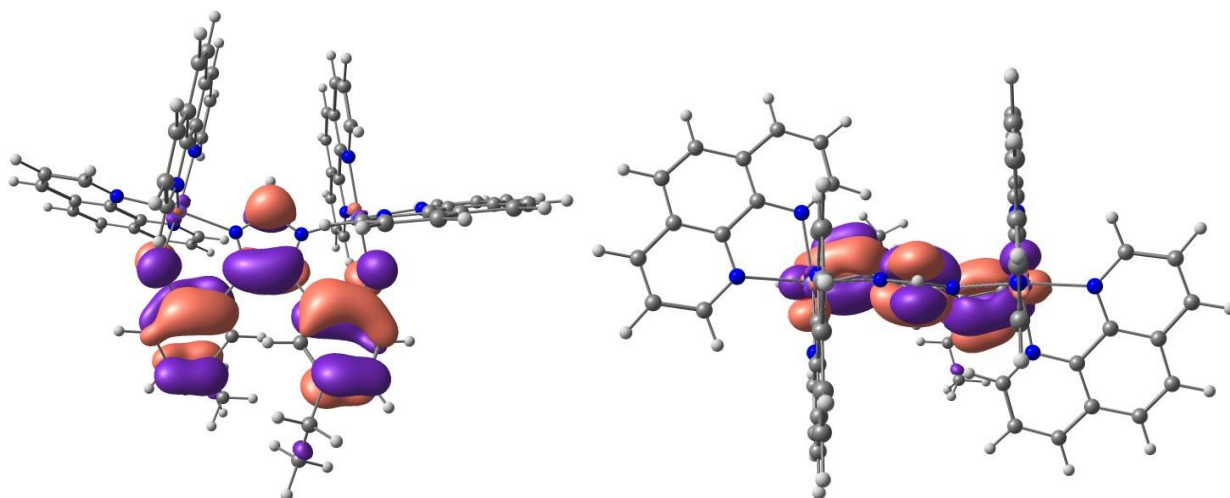

**S11.**  $\alpha$ -LUMO orbital (0.03 isosurface level) for  $[(\text{phen})_4\text{Ni}_2(\text{L})]^{2+}$  ( $E^{\text{LUMO}} = -0.1008$  a.u.)

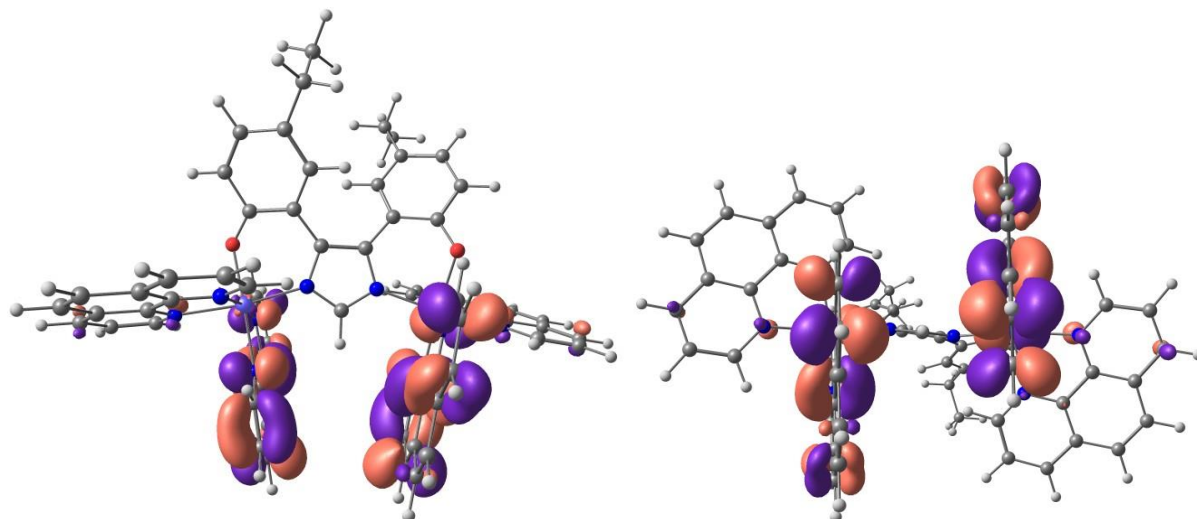

**S12.** Spin density (0.0065 isosurface level) for  $[(\text{phen})_4\text{Ni}_2(\text{L})]^{2+}$

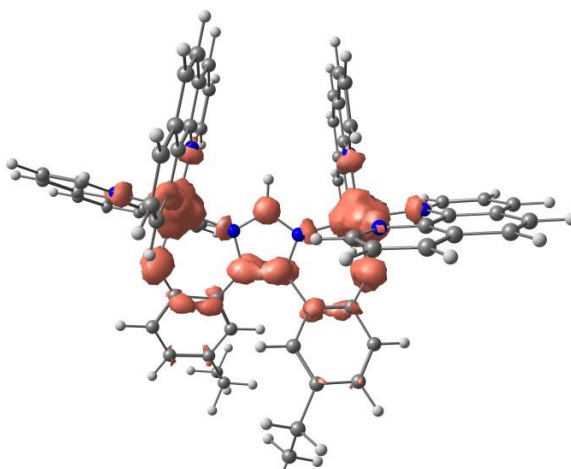

Supplement: s1 [file s1 › SI.pdf]
