# Supplementary material for: Binuclear Nickel Complexes of a New Di(hydroxyphenyl)imidazolate
Source: MDPI journal article supplement (doi:10.3390/magnetochemistry8100132), 2022-10-18
Supplement: s1 [file s1]

Archive with 5 entries (5 files):
- checkcif_[(bipy)4Ni2(L)](Cl)..pdf
- checkcif_[(phen)4Ni2(L)](Cl).pdf
- SI.pdf
- [(bipy)4Ni2(L)](Cl).cif
- [(phen)4Ni2(L)](Cl).cif
