# Supplementary material for: Binuclear Nickel Complexes of a New Di(hydroxyphenyl)imidazolate
Source: MDPI journal article supplement (doi:10.3390/magnetochemistry8100132), 2022-10-18
Supplement: s1 [file s1 › [(bipy)4Ni2(L)](Cl).cif]

data_nil2cl
_audit_creation_date               2022-09-13
_audit_creation_method
;
Olex2 1.5
(compiled 2022.04.07 svn.rca3783a0 for OlexSys, GUI svn.r6498)
;
_shelxl_version_number             2014/6
_audit_contact_author_address      ?
_audit_contact_author_email        ?
_audit_contact_author_name         ''
_audit_contact_author_phone        ?
_publ_contact_author_id_orcid      ?
_publ_section_references
;
Dolomanov, O.V., Bourhis, L.J., Gildea, R.J, Howard, J.A.K. & Puschmann, H.
 (2009), J. Appl. Cryst. 42, 339-341.

Sheldrick, G.M. (2008). Acta Cryst. A64, 112-122.
;
_chemical_name_common              ?
_chemical_name_systematic          ?
_chemical_formula_moiety          
 'C59 H49 N10 Ni2 O2, Cl, 2(C H4 O), 0.75(C4 H10 O)'
_chemical_formula_sum              'C64 H64.50 Cl N10 Ni2 O4.75'
_chemical_formula_weight           1202.62
_chemical_melting_point            ?
loop_
  _atom_type_symbol
  _atom_type_description
  _atom_type_scat_dispersion_real
  _atom_type_scat_dispersion_imag
  _atom_type_scat_source
 'C' 'C' 0.0033 0.0016 'International Tables Vol C Tables 4.2.6.8 and 6.1.1.4'
 'H' 'H' 0.0000 0.0000 'International Tables Vol C Tables 4.2.6.8 and 6.1.1.4'
 'Cl' 'Cl' 0.1484 0.1585 'International Tables Vol C Tables 4.2.6.8 and 6.1.1.4'
 'N' 'N' 0.0061 0.0033 'International Tables Vol C Tables 4.2.6.8 and 6.1.1.4'
 'Ni' 'Ni' 0.3393 1.1124 'International Tables Vol C Tables 4.2.6.8 and 6.1.1.4'
 'O' 'O' 0.0106 0.0060 'International Tables Vol C Tables 4.2.6.8 and 6.1.1.4'

_shelx_space_group_comment
;
The symmetry employed for this shelxl refinement is uniquely defined
by the following loop, which should always be used as a source of
symmetry information in preference to the above space-group names.
They are only intended as comments.
;
_space_group_crystal_system        'triclinic'
_space_group_IT_number             2
_space_group_name_H-M_alt          'P -1'
_space_group_name_Hall             '-P 1'
loop_
  _space_group_symop_operation_xyz
 'x, y, z'
 '-x, -y, -z'

_cell_length_a                     13.555(2)
_cell_length_b                     15.389(3)
_cell_length_c                     17.007(3)
_cell_angle_alpha                  77.732(3)
_cell_angle_beta                   70.231(3)
_cell_angle_gamma                  81.830(3)
_cell_volume                       3253.0(9)
_cell_formula_units_Z              2
_cell_measurement_reflns_used      4139
_cell_measurement_temperature      120
_cell_measurement_theta_max        30.53
_cell_measurement_theta_min        2.18
_shelx_estimated_absorpt_T_max     0.987
_shelx_estimated_absorpt_T_min     0.936
_exptl_absorpt_coefficient_mu      0.673
_exptl_absorpt_correction_T_max    0.7461
_exptl_absorpt_correction_T_min    0.5714
_exptl_absorpt_correction_type     multi-scan
_exptl_absorpt_process_details
;
SADABS-2008/1 (Bruker,2008) was used for absorption correction.
wR2(int) was 0.0932 before and 0.0690 after correction.
The Ratio of minimum to maximum transmission is 0.7658.
The \l/2 correction factor is 0.0015.
;
_exptl_absorpt_special_details     ?
_exptl_crystal_colour              'clear dark red'
_exptl_crystal_colour_lustre       clear
_exptl_crystal_colour_modifier     dark
_exptl_crystal_colour_primary      red
_exptl_crystal_density_diffrn      1.228
_exptl_crystal_density_meas        .
_exptl_crystal_density_method      ?
_exptl_crystal_description         plate
_exptl_crystal_F_000               1259
_exptl_crystal_size_max            0.1
_exptl_crystal_size_mid            0.03
_exptl_crystal_size_min            0.02
_exptl_transmission_factor_max     ?
_exptl_transmission_factor_min     ?
_diffrn_reflns_av_R_equivalents    0.1590
_diffrn_reflns_av_unetI/netI       0.1795
_diffrn_reflns_Laue_measured_fraction_full  0.999
_diffrn_reflns_Laue_measured_fraction_max  0.997
_diffrn_reflns_limit_h_max         17
_diffrn_reflns_limit_h_min         -17
_diffrn_reflns_limit_k_max         19
_diffrn_reflns_limit_k_min         -19
_diffrn_reflns_limit_l_max         21
_diffrn_reflns_limit_l_min         -21
_diffrn_reflns_number              45304
_diffrn_reflns_point_group_measured_fraction_full  0.999
_diffrn_reflns_point_group_measured_fraction_max  0.997
_diffrn_reflns_theta_full          25.242
_diffrn_reflns_theta_max           26.998
_diffrn_reflns_theta_min           1.702
_diffrn_ambient_temperature        120
_diffrn_detector_area_resol_mean   ?
_diffrn_measured_fraction_theta_full  0.999
_diffrn_measured_fraction_theta_max  0.997
_diffrn_measurement_device_type    'Bruker APEX-II DUO CCD'
_diffrn_measurement_method         '\f and \w scans'
_diffrn_radiation_type             MoK\a
_diffrn_radiation_wavelength       0.71073
_diffrn_source                     ?
_reflns_Friedel_coverage           0.000
_reflns_Friedel_fraction_full      .
_reflns_Friedel_fraction_max       .
_reflns_number_gt                  6921
_reflns_number_total               14150
_reflns_special_details
;
 Reflections were merged by SHELXL according to the crystal
 class for the calculation of statistics and refinement.
 
 Structure factors included contributions from the .fab file.
 
 _reflns_Friedel_fraction is defined as the number of unique
 Friedel pairs measured divided by the number that would be
 possible theoretically, ignoring centric projections and
 systematic absences.
;
_reflns_threshold_expression       'I > 2\s(I)'
_computing_cell_refinement         ?
_computing_data_collection         ?
_computing_data_reduction          ?
_computing_molecular_graphics      'Olex2 1.5 (Dolomanov et al., 2009)'
_computing_publication_material    'Olex2 1.5 (Dolomanov et al., 2009)'
_computing_structure_refinement    'XL  (Sheldrick, 2008)'
_computing_structure_solution      'ShelXT (Sheldrick, 2015)'
_refine_diff_density_max           0.955
_refine_diff_density_min           -0.694
_refine_diff_density_rms           0.108
_refine_ls_extinction_coef         .
_refine_ls_extinction_method       none
_refine_ls_goodness_of_fit_ref     0.955
_refine_ls_hydrogen_treatment      constr
_refine_ls_matrix_type             full
_refine_ls_number_parameters       756
_refine_ls_number_reflns           14150
_refine_ls_number_restraints       0
_refine_ls_R_factor_all            0.1660
_refine_ls_R_factor_gt             0.0794
_refine_ls_restrained_S_all        0.955
_refine_ls_shift/su_max            0.000
_refine_ls_shift/su_mean           0.000
_refine_ls_structure_factor_coef   Fsqd
_refine_ls_weighting_details      
 'w=1/[\s^2^(Fo^2^)+(0.1038P)^2^] where P=(Fo^2^+2Fc^2^)/3'
_refine_ls_weighting_scheme        calc
_refine_ls_wR_factor_gt            0.1799
_refine_ls_wR_factor_ref           0.2188
_refine_special_details            ?
_olex2_refinement_description
;
1. Fixed Uiso
 At 1.2 times of:
  All C(H) groups, All C(H,H) groups
 At 1.5 times of:
  All C(H,H,H) groups, All O(H) groups
2. Others
 Fixed Sof: O3S(0.75) C3S(0.75) H3SA(0.75) H3SB(0.75) C4S(0.75) H4SA(0.75)
 H4SB(0.75) H4SC(0.75) C5S(0.75) H5SA(0.75) H5SB(0.75) C6S(0.75) H6SA(0.75)
 H6SB(0.75) H6SC(0.75)
3.a Secondary CH2 refined with riding coordinates:
 C10(H10A,H10B), C18(H18A,H18B), C3S(H3SA,H3SB), C5S(H5SA,H5SB)
3.b Aromatic/amide H refined with riding coordinates:
 C1(H1), C5(H5), C7(H7), C8(H8), C13(H13), C15(H15), C16(H16), C20(H20),
 C21(H21), C22(H22), C23(H23), C26(H26), C27(H27), C28(H28), C29(H29), C30(H30),
  C31(H31), C32(H32), C33(H33), C36(H36), C37(H37), C38(H38), C39(H39),
 C40(H40), C41(H41), C42(H42), C43(H43), C46(H46), C47(H47), C48(H48), C49(H49),
  C50(H50), C51(H51), C52(H52), C53(H53), C56(H56), C57(H57), C58(H58), C59(H59)
3.c Idealised Me refined as rotating group:
 C11(H11A,H11B,H11C), C19(H19A,H19B,H19C), C1S(H1SA,H1SB,H1SC), C2S(H2SA,H2SB,
 H2SC), C4S(H4SA,H4SB,H4SC), C6S(H6SA,H6SB,H6SC)
3.d Idealised tetrahedral OH refined as rotating group:
 O1S(H1S), O2S(H2S)
;
_atom_sites_solution_hydrogens     geom
_atom_sites_solution_primary       ?
_atom_sites_solution_secondary     ?
loop_
  _atom_site_label
  _atom_site_type_symbol
  _atom_site_fract_x
  _atom_site_fract_y
  _atom_site_fract_z
  _atom_site_U_iso_or_equiv
  _atom_site_adp_type
  _atom_site_occupancy
  _atom_site_site_symmetry_order
  _atom_site_calc_flag
  _atom_site_refinement_flags_posn
  _atom_site_refinement_flags_adp
  _atom_site_refinement_flags_occupancy
  _atom_site_disorder_assembly
  _atom_site_disorder_group
 Ni1 Ni 0.69177(5) 0.20216(5) 0.56489(5) 0.0220(2) Uani 1 1 d . . . . .
 Ni2 Ni 0.98189(5) 0.22170(5) 0.76340(5) 0.0262(2) Uani 1 1 d . . . . .
 O1 O 0.7541(3) 0.2731(2) 0.4481(2) 0.0260(9) Uani 1 1 d . . . . .
 O2 O 1.1216(3) 0.2091(2) 0.6681(2) 0.0239(9) Uani 1 1 d . . . . .
 N1 N 0.8131(3) 0.2347(3) 0.5958(3) 0.0213(10) Uani 1 1 d . . . . .
 N2 N 0.9102(3) 0.2598(3) 0.6716(3) 0.0233(11) Uani 1 1 d . . . . .
 N3 N 0.7656(3) 0.0818(3) 0.5310(3) 0.0238(11) Uani 1 1 d . . . . .
 N4 N 0.5881(3) 0.1619(3) 0.5116(3) 0.0253(11) Uani 1 1 d . . . . .
 N5 N 0.5897(3) 0.3057(3) 0.6139(3) 0.0247(11) Uani 1 1 d . . . . .
 N6 N 0.6117(3) 0.1398(3) 0.6910(3) 0.0265(11) Uani 1 1 d . . . . .
 N7 N 1.0222(3) 0.3470(3) 0.7668(3) 0.0270(11) Uani 1 1 d . . . . .
 N8 N 1.0661(4) 0.1889(3) 0.8498(3) 0.0335(12) Uani 1 1 d . . . . .
 N9 N 0.8391(4) 0.2180(4) 0.8600(3) 0.0380(13) Uani 1 1 d . . . . .
 N10 N 0.9469(4) 0.0922(4) 0.7770(3) 0.0379(14) Uani 1 1 d . . . . .
 C1 C 0.8194(4) 0.2338(4) 0.6719(4) 0.0217(12) Uani 1 1 d . . . . .
 H1 H 0.7641 0.2162 0.7228 0.026 Uiso 1 1 calc R U . . .
 C2 C 0.9081(4) 0.2626(3) 0.5379(4) 0.0203(12) Uani 1 1 d . . . . .
 C3 C 0.9673(4) 0.2791(3) 0.5864(3) 0.0210(12) Uani 1 1 d . . . . .
 C4 C 0.9343(4) 0.2671(3) 0.4466(4) 0.0226(12) Uani 1 1 d . . . . .
 C5 C 1.0403(4) 0.2680(4) 0.3956(4) 0.0252(13) Uani 1 1 d . . . . .
 H5 H 1.0919 0.2635 0.4229 0.030 Uiso 1 1 calc R U . . .
 C6 C 1.0742(5) 0.2752(4) 0.3089(4) 0.0315(14) Uani 1 1 d . . . . .
 C7 C 0.9974(5) 0.2780(4) 0.2700(4) 0.0326(14) Uani 1 1 d . . . . .
 H7 H 1.0176 0.2823 0.2102 0.039 Uiso 1 1 calc R U . . .
 C8 C 0.8914(4) 0.2746(4) 0.3185(4) 0.0291(14) Uani 1 1 d . . . . .
 H8 H 0.8411 0.2746 0.2909 0.035 Uiso 1 1 calc R U . . .
 C9 C 0.8569(4) 0.2711(3) 0.4069(4) 0.0234(13) Uani 1 1 d . . . . .
 C10 C 1.1898(5) 0.2814(4) 0.2549(4) 0.0362(15) Uani 1 1 d . . . . .
 H10A H 1.1995 0.2659 0.1991 0.043 Uiso 1 1 calc R U . . .
 H10B H 1.2075 0.3439 0.2449 0.043 Uiso 1 1 calc R U . . .
 C11 C 1.2662(6) 0.2212(8) 0.2945(6) 0.088(3) Uani 1 1 d . . . . .
 H11A H 1.2495 0.1591 0.3048 0.132 Uiso 1 1 calc R U . . .
 H11B H 1.2602 0.2382 0.3484 0.132 Uiso 1 1 calc R U . . .
 H11C H 1.3382 0.2276 0.2557 0.132 Uiso 1 1 calc R U . . .
 C12 C 1.0705(4) 0.3169(3) 0.5618(3) 0.0213(12) Uani 1 1 d . . . . .
 C13 C 1.0926(4) 0.3939(3) 0.5006(4) 0.0233(12) Uani 1 1 d . . . . .
 H13 H 1.0428 0.4184 0.4722 0.028 Uiso 1 1 calc R U . . .
 C14 C 1.1842(4) 0.4364(4) 0.4793(4) 0.0236(12) Uani 1 1 d . . . . .
 C15 C 1.2559(4) 0.3971(4) 0.5221(4) 0.0272(14) Uani 1 1 d . . . . .
 H15 H 1.3206 0.4231 0.5081 0.033 Uiso 1 1 calc R U . . .
 C16 C 1.2357(4) 0.3222(4) 0.5836(4) 0.0258(13) Uani 1 1 d . . . . .
 H16 H 1.2857 0.2984 0.6120 0.031 Uiso 1 1 calc R U . . .
 C17 C 1.1427(4) 0.2799(4) 0.6054(3) 0.0214(12) Uani 1 1 d . . . . .
 C18 C 1.2064(4) 0.5190(4) 0.4124(4) 0.0307(14) Uani 1 1 d . . . . .
 H18A H 1.2420 0.5594 0.4304 0.037 Uiso 1 1 calc R U . . .
 H18B H 1.1387 0.5502 0.4084 0.037 Uiso 1 1 calc R U . . .
 C19 C 1.2740(5) 0.5008(5) 0.3254(4) 0.0467(18) Uani 1 1 d . . . . .
 H19A H 1.2868 0.5574 0.2856 0.070 Uiso 1 1 calc R U . . .
 H19B H 1.2377 0.4634 0.3057 0.070 Uiso 1 1 calc R U . . .
 H19C H 1.3413 0.4699 0.3287 0.070 Uiso 1 1 calc R U . . .
 C20 C 0.8469(4) 0.0377(4) 0.5545(4) 0.0267(13) Uani 1 1 d . . . . .
 H20 H 0.8776 0.0649 0.5849 0.032 Uiso 1 1 calc R U . . .
 C21 C 0.8873(4) -0.0452(4) 0.5361(4) 0.0283(14) Uani 1 1 d . . . . .
 H21 H 0.9435 -0.0754 0.5551 0.034 Uiso 1 1 calc R U . . .
 C22 C 0.8459(5) -0.0842(4) 0.4900(4) 0.0336(15) Uani 1 1 d . . . . .
 H22 H 0.8741 -0.1410 0.4755 0.040 Uiso 1 1 calc R U . . .
 C23 C 0.7618(5) -0.0392(4) 0.4648(4) 0.0327(14) Uani 1 1 d . . . . .
 H23 H 0.7321 -0.0647 0.4325 0.039 Uiso 1 1 calc R U . . .
 C24 C 0.7222(4) 0.0436(4) 0.4875(4) 0.0237(13) Uani 1 1 d . . . . .
 C25 C 0.6279(4) 0.0933(4) 0.4702(4) 0.0238(13) Uani 1 1 d . . . . .
 C26 C 0.5816(5) 0.0684(4) 0.4182(4) 0.0354(15) Uani 1 1 d . . . . .
 H26 H 0.6125 0.0204 0.3886 0.042 Uiso 1 1 calc R U . . .
 C27 C 0.4889(5) 0.1152(4) 0.4099(5) 0.0400(17) Uani 1 1 d . . . . .
 H27 H 0.4546 0.0984 0.3757 0.048 Uiso 1 1 calc R U . . .
 C28 C 0.4472(5) 0.1862(4) 0.4519(4) 0.0360(16) Uani 1 1 d . . . . .
 H28 H 0.3846 0.2197 0.4464 0.043 Uiso 1 1 calc R U . . .
 C29 C 0.4990(4) 0.2075(4) 0.5023(4) 0.0306(14) Uani 1 1 d . . . . .
 H29 H 0.4705 0.2562 0.5314 0.037 Uiso 1 1 calc R U . . .
 C30 C 0.5769(4) 0.3877(4) 0.5696(4) 0.0280(14) Uani 1 1 d . . . . .
 H30 H 0.6179 0.4005 0.5115 0.034 Uiso 1 1 calc R U . . .
 C31 C 0.5058(4) 0.4549(4) 0.6054(4) 0.0352(15) Uani 1 1 d . . . . .
 H31 H 0.4974 0.5119 0.5725 0.042 Uiso 1 1 calc R U . . .
 C32 C 0.4484(5) 0.4355(4) 0.6900(5) 0.0458(18) Uani 1 1 d . . . . .
 H32 H 0.4010 0.4803 0.7166 0.055 Uiso 1 1 calc R U . . .
 C33 C 0.4591(5) 0.3519(5) 0.7365(5) 0.0444(18) Uani 1 1 d . . . . .
 H33 H 0.4177 0.3378 0.7945 0.053 Uiso 1 1 calc R U . . .
 C34 C 0.5324(4) 0.2880(4) 0.6966(4) 0.0292(14) Uani 1 1 d . . . . .
 C35 C 0.5471(4) 0.1966(4) 0.7411(4) 0.0268(13) Uani 1 1 d . . . . .
 C36 C 0.4976(5) 0.1690(4) 0.8272(4) 0.0358(15) Uani 1 1 d . . . . .
 H36 H 0.4557 0.2105 0.8616 0.043 Uiso 1 1 calc R U . . .
 C37 C 0.5104(5) 0.0799(5) 0.8620(4) 0.0443(18) Uani 1 1 d . . . . .
 H37 H 0.4767 0.0590 0.9206 0.053 Uiso 1 1 calc R U . . .
 C38 C 0.5734(5) 0.0212(4) 0.8096(4) 0.0384(16) Uani 1 1 d . . . . .
 H38 H 0.5824 -0.0405 0.8316 0.046 Uiso 1 1 calc R U . . .
 C39 C 0.6219(4) 0.0543(4) 0.7260(4) 0.0304(14) Uani 1 1 d . . . . .
 H39 H 0.6653 0.0140 0.6908 0.036 Uiso 1 1 calc R U . . .
 C40 C 1.0049(5) 0.4227(4) 0.7170(4) 0.0326(14) Uani 1 1 d . . . . .
 H40 H 0.9516 0.4260 0.6916 0.039 Uiso 1 1 calc R U . . .
 C41 C 1.0603(5) 0.4970(4) 0.7001(4) 0.0366(15) Uani 1 1 d . . . . .
 H41 H 1.0454 0.5500 0.6642 0.044 Uiso 1 1 calc R U . . .
 C42 C 1.1366(5) 0.4920(5) 0.7363(5) 0.0434(17) Uani 1 1 d . . . . .
 H42 H 1.1770 0.5416 0.7248 0.052 Uiso 1 1 calc R U . . .
 C43 C 1.1558(5) 0.4156(4) 0.7896(4) 0.0403(16) Uani 1 1 d . . . . .
 H43 H 1.2078 0.4127 0.8162 0.048 Uiso 1 1 calc R U . . .
 C44 C 1.0984(5) 0.3429(4) 0.8039(4) 0.0316(14) Uani 1 1 d . . . . .
 C45 C 1.1137(5) 0.2569(4) 0.8574(4) 0.0347(15) Uani 1 1 d . . . . .
 C46 C 1.1748(5) 0.2439(5) 0.9098(4) 0.0449(18) Uani 1 1 d . . . . .
 H46 H 1.2083 0.2923 0.9137 0.054 Uiso 1 1 calc R U . . .
 C47 C 1.1873(6) 0.1609(6) 0.9564(5) 0.055(2) Uani 1 1 d . . . . .
 H47 H 1.2297 0.1518 0.9923 0.066 Uiso 1 1 calc R U . . .
 C48 C 1.1380(6) 0.0905(5) 0.9509(5) 0.055(2) Uani 1 1 d . . . . .
 H48 H 1.1436 0.0330 0.9839 0.066 Uiso 1 1 calc R U . . .
 C49 C 1.0805(5) 0.1077(5) 0.8958(4) 0.0419(17) Uani 1 1 d . . . . .
 H49 H 1.0489 0.0594 0.8895 0.050 Uiso 1 1 calc R U . . .
 C50 C 0.7891(6) 0.2868(6) 0.8997(5) 0.054(2) Uani 1 1 d . . . . .
 H50 H 0.8220 0.3411 0.8851 0.065 Uiso 1 1 calc R U . . .
 C51 C 0.6920(6) 0.2805(7) 0.9605(5) 0.074(3) Uani 1 1 d . . . . .
 H51 H 0.6590 0.3303 0.9870 0.089 Uiso 1 1 calc R U . . .
 C52 C 0.6425(7) 0.2040(9) 0.9834(6) 0.087(3) Uani 1 1 d . . . . .
 H52 H 0.5747 0.1998 1.0246 0.104 Uiso 1 1 calc R U . . .
 C53 C 0.6937(6) 0.1328(7) 0.9449(5) 0.071(3) Uani 1 1 d . . . . .
 H53 H 0.6621 0.0777 0.9608 0.086 Uiso 1 1 calc R U . . .
 C54 C 0.7928(5) 0.1411(5) 0.8819(4) 0.0466(19) Uani 1 1 d . . . . .
 C55 C 0.8518(5) 0.0703(5) 0.8339(5) 0.0455(19) Uani 1 1 d . . . . .
 C56 C 0.8170(6) -0.0134(5) 0.8427(5) 0.057(2) Uani 1 1 d . . . . .
 H56 H 0.7499 -0.0279 0.8815 0.068 Uiso 1 1 calc R U . . .
 C57 C 0.8775(7) -0.0733(5) 0.7967(6) 0.061(2) Uani 1 1 d . . . . .
 H57 H 0.8541 -0.1307 0.8040 0.074 Uiso 1 1 calc R U . . .
 C58 C 0.9742(6) -0.0515(5) 0.7386(5) 0.058(2) Uani 1 1 d . . . . .
 H58 H 1.0182 -0.0928 0.7049 0.069 Uiso 1 1 calc R U . . .
 C59 C 1.0041(6) 0.0325(4) 0.7316(5) 0.0407(17) Uani 1 1 d . . . . .
 H59 H 1.0701 0.0484 0.6916 0.049 Uiso 1 1 calc R U . . .
 Cl1 Cl 0.62783(12) -0.18041(13) 0.94279(11) 0.0479(5) Uani 1 1 d . . . . .
 O1S O 0.6348(4) 0.3669(3) 0.3622(3) 0.0494(13) Uani 1 1 d . . . . .
 H1S H 0.6830 0.3383 0.3799 0.074 Uiso 1 1 calc R U . . .
 C1S C 0.6240(6) 0.3278(5) 0.2987(5) 0.053(2) Uani 1 1 d . . . . .
 H1SA H 0.6407 0.2633 0.3106 0.079 Uiso 1 1 calc R U . . .
 H1SB H 0.6722 0.3531 0.2436 0.079 Uiso 1 1 calc R U . . .
 H1SC H 0.5515 0.3397 0.2975 0.079 Uiso 1 1 calc R U . . .
 O2S O 1.2686(4) 0.0935(3) 0.6946(3) 0.0446(12) Uani 1 1 d . . . . .
 H2S H 1.2246 0.1353 0.6852 0.067 Uiso 1 1 calc R U . . .
 C2S C 1.3372(5) 0.1245(5) 0.7269(5) 0.0430(17) Uani 1 1 d . . . . .
 H2SA H 1.3782 0.0737 0.7495 0.064 Uiso 1 1 calc R U . . .
 H2SB H 1.2963 0.1575 0.7724 0.064 Uiso 1 1 calc R U . . .
 H2SC H 1.3850 0.1640 0.6814 0.064 Uiso 1 1 calc R U . . .
 O3S O 0.8967(7) 0.3928(6) 1.0069(6) 0.089(3) Uani 0.75 1 d . . P . .
 C3S C 0.8424(15) 0.4786(11) 1.0055(9) 0.121(6) Uani 0.75 1 d . . P . .
 H3SA H 0.8534 0.5072 1.0485 0.145 Uiso 0.75 1 calc R U P . .
 H3SB H 0.7661 0.4721 1.0214 0.145 Uiso 0.75 1 calc R U P . .
 C4S C 0.8771(13) 0.5375(9) 0.9212(9) 0.114(6) Uani 0.75 1 d . . P . .
 H4SA H 0.8533 0.5161 0.8808 0.171 Uiso 0.75 1 calc R U P . .
 H4SB H 0.9540 0.5367 0.9008 0.171 Uiso 0.75 1 calc R U P . .
 H4SC H 0.8468 0.5986 0.9264 0.171 Uiso 0.75 1 calc R U P . .
 C5S C 0.8742(12) 0.3316(11) 1.0778(8) 0.097(5) Uani 0.75 1 d . . P . .
 H5SA H 0.8999 0.3530 1.1177 0.116 Uiso 0.75 1 calc R U P . .
 H5SB H 0.7966 0.3351 1.1019 0.116 Uiso 0.75 1 calc R U P . .
 C6S C 0.9040(17) 0.2479(10) 1.0826(10) 0.144(9) Uani 0.75 1 d . . P . .
 H6SA H 0.8445 0.2128 1.1178 0.216 Uiso 0.75 1 calc R U P . .
 H6SB H 0.9606 0.2343 1.1081 0.216 Uiso 0.75 1 calc R U P . .
 H6SC H 0.9297 0.2328 1.0256 0.216 Uiso 0.75 1 calc R U P . .

loop_
  _atom_site_aniso_label
  _atom_site_aniso_U_11
  _atom_site_aniso_U_22
  _atom_site_aniso_U_33
  _atom_site_aniso_U_23
  _atom_site_aniso_U_13
  _atom_site_aniso_U_12
 Ni1 0.0118(3) 0.0206(4) 0.0356(5) -0.0038(3) -0.0113(3) 0.0003(3)
 Ni2 0.0177(4) 0.0299(4) 0.0330(5) 0.0007(3) -0.0128(3) -0.0058(3)
 O1 0.0151(19) 0.030(2) 0.036(2) -0.0064(18) -0.0133(18) 0.0024(16)
 O2 0.0159(19) 0.022(2) 0.034(2) 0.0013(17) -0.0111(17) -0.0033(15)
 N1 0.012(2) 0.022(2) 0.028(3) -0.001(2) -0.006(2) -0.0015(18)
 N2 0.010(2) 0.036(3) 0.025(3) -0.003(2) -0.007(2) -0.0032(19)
 N3 0.014(2) 0.020(2) 0.039(3) -0.002(2) -0.012(2) -0.0027(18)
 N4 0.018(2) 0.021(3) 0.040(3) 0.000(2) -0.016(2) 0.0000(19)
 N5 0.012(2) 0.029(3) 0.035(3) -0.006(2) -0.010(2) -0.0015(19)
 N6 0.017(2) 0.023(3) 0.043(3) 0.002(2) -0.018(2) -0.0015(19)
 N7 0.016(2) 0.035(3) 0.032(3) -0.007(2) -0.011(2) 0.002(2)
 N8 0.026(3) 0.038(3) 0.031(3) 0.006(2) -0.008(2) -0.008(2)
 N9 0.023(3) 0.058(4) 0.035(3) 0.002(3) -0.013(2) -0.013(3)
 N10 0.034(3) 0.035(3) 0.049(4) 0.011(3) -0.026(3) -0.013(3)
 C1 0.014(3) 0.028(3) 0.022(3) -0.001(2) -0.006(2) -0.001(2)
 C2 0.013(3) 0.016(3) 0.032(3) -0.003(2) -0.010(2) 0.003(2)
 C3 0.013(3) 0.023(3) 0.029(3) -0.004(2) -0.010(2) 0.001(2)
 C4 0.023(3) 0.014(3) 0.031(3) -0.001(2) -0.011(3) 0.000(2)
 C5 0.022(3) 0.022(3) 0.033(4) -0.005(2) -0.011(3) -0.003(2)
 C6 0.029(3) 0.023(3) 0.043(4) -0.002(3) -0.014(3) -0.003(3)
 C7 0.038(4) 0.029(3) 0.031(4) -0.007(3) -0.010(3) -0.004(3)
 C8 0.023(3) 0.026(3) 0.040(4) -0.008(3) -0.012(3) 0.002(2)
 C9 0.023(3) 0.018(3) 0.030(3) -0.001(2) -0.011(3) -0.002(2)
 C10 0.031(3) 0.042(4) 0.031(4) -0.010(3) -0.002(3) -0.005(3)
 C11 0.028(4) 0.157(10) 0.064(6) 0.004(6) -0.015(4) 0.007(5)
 C12 0.019(3) 0.018(3) 0.028(3) -0.001(2) -0.010(2) -0.002(2)
 C13 0.016(3) 0.021(3) 0.035(3) -0.006(2) -0.012(3) 0.003(2)
 C14 0.019(3) 0.021(3) 0.031(3) -0.003(2) -0.007(2) -0.002(2)
 C15 0.013(3) 0.023(3) 0.041(4) 0.002(3) -0.006(3) -0.004(2)
 C16 0.017(3) 0.024(3) 0.036(4) -0.004(3) -0.010(3) 0.001(2)
 C17 0.014(3) 0.023(3) 0.025(3) -0.003(2) -0.004(2) 0.002(2)
 C18 0.022(3) 0.031(3) 0.038(4) 0.007(3) -0.012(3) -0.012(3)
 C19 0.044(4) 0.041(4) 0.044(4) 0.006(3) -0.008(3) -0.005(3)
 C20 0.010(3) 0.020(3) 0.051(4) -0.003(3) -0.016(3) 0.004(2)
 C21 0.018(3) 0.025(3) 0.041(4) -0.001(3) -0.012(3) 0.002(2)
 C22 0.030(3) 0.022(3) 0.050(4) -0.010(3) -0.016(3) 0.006(3)
 C23 0.031(3) 0.024(3) 0.048(4) -0.009(3) -0.018(3) 0.001(3)
 C24 0.013(3) 0.023(3) 0.036(4) -0.005(2) -0.009(2) 0.000(2)
 C25 0.016(3) 0.024(3) 0.034(3) -0.001(3) -0.013(3) -0.002(2)
 C26 0.034(4) 0.030(3) 0.048(4) -0.008(3) -0.019(3) -0.002(3)
 C27 0.029(3) 0.038(4) 0.066(5) -0.017(3) -0.030(3) 0.002(3)
 C28 0.019(3) 0.041(4) 0.053(4) -0.006(3) -0.019(3) 0.002(3)
 C29 0.018(3) 0.030(3) 0.048(4) -0.008(3) -0.018(3) 0.002(2)
 C30 0.020(3) 0.022(3) 0.045(4) -0.001(3) -0.018(3) -0.001(2)
 C31 0.018(3) 0.028(3) 0.059(5) -0.008(3) -0.012(3) 0.001(2)
 C32 0.028(4) 0.029(4) 0.069(5) -0.010(3) -0.003(4) 0.006(3)
 C33 0.023(3) 0.043(4) 0.056(5) -0.012(3) 0.000(3) 0.001(3)
 C34 0.022(3) 0.027(3) 0.040(4) -0.006(3) -0.010(3) -0.007(2)
 C35 0.014(3) 0.034(3) 0.036(4) -0.004(3) -0.013(3) -0.003(2)
 C36 0.029(3) 0.040(4) 0.035(4) -0.002(3) -0.008(3) -0.003(3)
 C37 0.029(4) 0.065(5) 0.036(4) 0.003(4) -0.012(3) -0.011(3)
 C38 0.031(4) 0.037(4) 0.048(4) 0.009(3) -0.022(3) -0.006(3)
 C39 0.017(3) 0.032(3) 0.043(4) -0.001(3) -0.014(3) 0.000(2)
 C40 0.029(3) 0.034(4) 0.039(4) -0.011(3) -0.016(3) 0.004(3)
 C41 0.037(4) 0.026(3) 0.047(4) -0.010(3) -0.015(3) 0.006(3)
 C42 0.031(4) 0.043(4) 0.063(5) -0.016(4) -0.017(4) -0.008(3)
 C43 0.033(4) 0.044(4) 0.054(5) -0.015(3) -0.023(3) 0.000(3)
 C44 0.028(3) 0.039(4) 0.034(4) -0.013(3) -0.015(3) 0.001(3)
 C45 0.023(3) 0.049(4) 0.035(4) -0.003(3) -0.012(3) -0.009(3)
 C46 0.032(4) 0.068(5) 0.041(4) -0.007(4) -0.020(3) -0.009(3)
 C47 0.044(4) 0.080(6) 0.050(5) 0.007(4) -0.033(4) -0.011(4)
 C48 0.051(5) 0.065(5) 0.048(5) 0.019(4) -0.029(4) -0.013(4)
 C49 0.041(4) 0.045(4) 0.040(4) 0.016(3) -0.025(3) -0.009(3)
 C50 0.035(4) 0.083(6) 0.050(5) -0.019(4) -0.014(4) -0.009(4)
 C51 0.027(4) 0.138(9) 0.055(6) -0.030(6) -0.003(4) -0.004(5)
 C52 0.037(5) 0.159(11) 0.062(6) -0.032(7) 0.004(5) -0.032(6)
 C53 0.039(5) 0.124(9) 0.051(5) 0.023(5) -0.024(4) -0.044(5)
 C54 0.025(3) 0.075(5) 0.043(4) 0.009(4) -0.022(3) -0.015(4)
 C55 0.039(4) 0.046(4) 0.056(5) 0.024(4) -0.035(4) -0.017(3)
 C56 0.042(4) 0.056(5) 0.076(6) 0.028(4) -0.040(4) -0.026(4)
 C57 0.067(6) 0.032(4) 0.100(7) 0.022(4) -0.057(5) -0.026(4)
 C58 0.067(5) 0.033(4) 0.090(6) 0.007(4) -0.053(5) -0.013(4)
 C59 0.049(4) 0.026(4) 0.058(5) 0.007(3) -0.036(4) -0.013(3)
 Cl1 0.0279(8) 0.0733(13) 0.0392(10) 0.0032(9) -0.0104(7) -0.0140(8)
 O1S 0.049(3) 0.039(3) 0.070(4) -0.012(2) -0.038(3) 0.016(2)
 C1S 0.045(4) 0.065(5) 0.056(5) -0.009(4) -0.028(4) -0.003(4)
 O2S 0.043(3) 0.037(3) 0.072(3) -0.020(2) -0.042(3) 0.014(2)
 C2S 0.032(4) 0.047(4) 0.060(5) -0.011(3) -0.030(3) 0.002(3)
 O3S 0.088(7) 0.080(7) 0.084(7) -0.025(5) -0.001(5) -0.015(5)
 C3S 0.174(18) 0.105(13) 0.075(11) -0.040(10) -0.018(11) -0.001(12)
 C4S 0.157(16) 0.080(10) 0.072(10) 0.001(8) -0.008(10) 0.005(10)
 C5S 0.116(12) 0.132(14) 0.042(8) 0.009(9) -0.036(8) -0.019(11)
 C6S 0.30(3) 0.076(11) 0.133(14) -0.030(10) -0.173(18) 0.018(13)

_geom_special_details
;
 All esds (except the esd in the dihedral angle between two l.s. planes)
 are estimated using the full covariance matrix.  The cell esds are taken
 into account individually in the estimation of esds in distances, angles
 and torsion angles; correlations between esds in cell parameters are only
 used when they are defined by crystal symmetry.  An approximate (isotropic)
 treatment of cell esds is used for estimating esds involving l.s. planes.
;
loop_
  _geom_bond_atom_site_label_1
  _geom_bond_atom_site_label_2
  _geom_bond_distance
  _geom_bond_site_symmetry_2
  _geom_bond_publ_flag
 Ni1 O1 2.014(4) . ?
 Ni1 N1 2.040(4) . ?
 Ni1 N3 2.074(5) . ?
 Ni1 N4 2.128(4) . ?
 Ni1 N5 2.075(5) . ?
 Ni1 N6 2.132(5) . ?
 Ni2 O2 2.050(4) . ?
 Ni2 N2 2.050(4) . ?
 Ni2 N7 2.095(5) . ?
 Ni2 N8 2.091(5) . ?
 Ni2 N9 2.072(5) . ?
 Ni2 N10 2.062(5) . ?
 O1 C9 1.330(6) . ?
 O2 C17 1.340(6) . ?
 N1 C1 1.323(7) . ?
 N1 C2 1.390(6) . ?
 N2 C1 1.346(6) . ?
 N2 C3 1.381(7) . ?
 N3 C20 1.343(6) . ?
 N3 C24 1.348(7) . ?
 N4 C25 1.342(7) . ?
 N4 C29 1.348(7) . ?
 N5 C30 1.345(7) . ?
 N5 C34 1.347(7) . ?
 N6 C35 1.360(7) . ?
 N6 C39 1.333(7) . ?
 N7 C40 1.330(7) . ?
 N7 C44 1.369(7) . ?
 N8 C45 1.354(8) . ?
 N8 C49 1.354(8) . ?
 N9 C50 1.351(9) . ?
 N9 C54 1.341(8) . ?
 N10 C55 1.361(8) . ?
 N10 C59 1.317(9) . ?
 C1 H1 0.9500 . ?
 C2 C3 1.409(7) . ?
 C2 C4 1.460(8) . ?
 C3 C12 1.484(7) . ?
 C4 C5 1.405(7) . ?
 C4 C9 1.415(7) . ?
 C5 H5 0.9500 . ?
 C5 C6 1.373(8) . ?
 C6 C7 1.401(8) . ?
 C6 C10 1.530(8) . ?
 C7 H7 0.9500 . ?
 C7 C8 1.396(8) . ?
 C8 H8 0.9500 . ?
 C8 C9 1.408(8) . ?
 C10 H10A 0.9900 . ?
 C10 H10B 0.9900 . ?
 C10 C11 1.522(10) . ?
 C11 H11A 0.9800 . ?
 C11 H11B 0.9800 . ?
 C11 H11C 0.9800 . ?
 C12 C13 1.395(7) . ?
 C12 C17 1.410(7) . ?
 C13 H13 0.9500 . ?
 C13 C14 1.388(7) . ?
 C14 C15 1.402(7) . ?
 C14 C18 1.504(7) . ?
 C15 H15 0.9500 . ?
 C15 C16 1.372(7) . ?
 C16 H16 0.9500 . ?
 C16 C17 1.401(7) . ?
 C18 H18A 0.9900 . ?
 C18 H18B 0.9900 . ?
 C18 C19 1.514(9) . ?
 C19 H19A 0.9800 . ?
 C19 H19B 0.9800 . ?
 C19 H19C 0.9800 . ?
 C20 H20 0.9500 . ?
 C20 C21 1.371(8) . ?
 C21 H21 0.9500 . ?
 C21 C22 1.373(8) . ?
 C22 H22 0.9500 . ?
 C22 C23 1.393(8) . ?
 C23 H23 0.9500 . ?
 C23 C24 1.391(8) . ?
 C24 C25 1.479(7) . ?
 C25 C26 1.382(8) . ?
 C26 H26 0.9500 . ?
 C26 C27 1.392(8) . ?
 C27 H27 0.9500 . ?
 C27 C28 1.381(9) . ?
 C28 H28 0.9500 . ?
 C28 C29 1.388(8) . ?
 C29 H29 0.9500 . ?
 C30 H30 0.9500 . ?
 C30 C31 1.399(8) . ?
 C31 H31 0.9500 . ?
 C31 C32 1.374(9) . ?
 C32 H32 0.9500 . ?
 C32 C33 1.377(9) . ?
 C33 H33 0.9500 . ?
 C33 C34 1.402(9) . ?
 C34 C35 1.470(8) . ?
 C35 C36 1.387(8) . ?
 C36 H36 0.9500 . ?
 C36 C37 1.385(9) . ?
 C37 H37 0.9500 . ?
 C37 C38 1.395(10) . ?
 C38 H38 0.9500 . ?
 C38 C39 1.368(8) . ?
 C39 H39 0.9500 . ?
 C40 H40 0.9500 . ?
 C40 C41 1.383(8) . ?
 C41 H41 0.9500 . ?
 C41 C42 1.358(9) . ?
 C42 H42 0.9500 . ?
 C42 C43 1.375(9) . ?
 C43 H43 0.9500 . ?
 C43 C44 1.385(8) . ?
 C44 C45 1.470(9) . ?
 C45 C46 1.378(8) . ?
 C46 H46 0.9500 . ?
 C46 C47 1.373(10) . ?
 C47 H47 0.9500 . ?
 C47 C48 1.385(10) . ?
 C48 H48 0.9500 . ?
 C48 C49 1.373(9) . ?
 C49 H49 0.9500 . ?
 C50 H50 0.9500 . ?
 C50 C51 1.373(10) . ?
 C51 H51 0.9500 . ?
 C51 C52 1.356(13) . ?
 C52 H52 0.9500 . ?
 C52 C53 1.376(14) . ?
 C53 H53 0.9500 . ?
 C53 C54 1.409(10) . ?
 C54 C55 1.476(11) . ?
 C55 C56 1.395(10) . ?
 C56 H56 0.9500 . ?
 C56 C57 1.339(12) . ?
 C57 H57 0.9500 . ?
 C57 C58 1.384(11) . ?
 C58 H58 0.9500 . ?
 C58 C59 1.379(9) . ?
 C59 H59 0.9500 . ?
 O1S H1S 0.8400 . ?
 O1S C1S 1.399(8) . ?
 C1S H1SA 0.9800 . ?
 C1S H1SB 0.9800 . ?
 C1S H1SC 0.9800 . ?
 O2S H2S 0.8400 . ?
 O2S C2S 1.406(7) . ?
 C2S H2SA 0.9800 . ?
 C2S H2SB 0.9800 . ?
 C2S H2SC 0.9800 . ?
 O3S C3S 1.417(17) . ?
 O3S C5S 1.335(14) . ?
 C3S H3SA 0.9900 . ?
 C3S H3SB 0.9900 . ?
 C3S C4S 1.487(18) . ?
 C4S H4SA 0.9800 . ?
 C4S H4SB 0.9800 . ?
 C4S H4SC 0.9800 . ?
 C5S H5SA 0.9900 . ?
 C5S H5SB 0.9900 . ?
 C5S C6S 1.289(18) . ?
 C6S H6SA 0.9800 . ?
 C6S H6SB 0.9800 . ?
 C6S H6SC 0.9800 . ?

loop_
  _geom_angle_atom_site_label_1
  _geom_angle_atom_site_label_2
  _geom_angle_atom_site_label_3
  _geom_angle
  _geom_angle_site_symmetry_1
  _geom_angle_site_symmetry_3
  _geom_angle_publ_flag
 O1 Ni1 N1 87.71(16) . . ?
 O1 Ni1 N3 93.95(17) . . ?
 O1 Ni1 N4 84.92(16) . . ?
 O1 Ni1 N5 95.77(17) . . ?
 O1 Ni1 N6 173.20(17) . . ?
 N1 Ni1 N3 94.84(17) . . ?
 N1 Ni1 N4 169.06(18) . . ?
 N1 Ni1 N5 93.81(17) . . ?
 N1 Ni1 N6 94.19(17) . . ?
 N3 Ni1 N4 77.66(17) . . ?
 N3 Ni1 N5 167.23(17) . . ?
 N3 Ni1 N6 92.39(18) . . ?
 N4 Ni1 N6 94.07(17) . . ?
 N5 Ni1 N4 94.96(17) . . ?
 N5 Ni1 N6 77.60(18) . . ?
 O2 Ni2 N7 88.08(16) . . ?
 O2 Ni2 N8 88.12(17) . . ?
 O2 Ni2 N9 172.95(19) . . ?
 O2 Ni2 N10 94.43(19) . . ?
 N2 Ni2 O2 87.88(16) . . ?
 N2 Ni2 N7 98.72(18) . . ?
 N2 Ni2 N8 174.99(18) . . ?
 N2 Ni2 N9 92.24(18) . . ?
 N2 Ni2 N10 89.58(19) . . ?
 N8 Ni2 N7 78.14(19) . . ?
 N9 Ni2 N7 98.9(2) . . ?
 N9 Ni2 N8 92.10(19) . . ?
 N10 Ni2 N7 171.42(19) . . ?
 N10 Ni2 N8 93.7(2) . . ?
 N10 Ni2 N9 78.5(2) . . ?
 C9 O1 Ni1 123.1(3) . . ?
 C17 O2 Ni2 115.3(3) . . ?
 C1 N1 Ni1 128.7(3) . . ?
 C1 N1 C2 106.2(4) . . ?
 C2 N1 Ni1 125.1(4) . . ?
 C1 N2 Ni2 127.7(4) . . ?
 C1 N2 C3 103.9(4) . . ?
 C3 N2 Ni2 121.9(3) . . ?
 C20 N3 Ni1 124.8(4) . . ?
 C20 N3 C24 119.1(5) . . ?
 C24 N3 Ni1 116.0(3) . . ?
 C25 N4 Ni1 114.0(3) . . ?
 C25 N4 C29 118.3(5) . . ?
 C29 N4 Ni1 126.4(4) . . ?
 C30 N5 Ni1 125.1(4) . . ?
 C30 N5 C34 118.5(5) . . ?
 C34 N5 Ni1 116.3(4) . . ?
 C35 N6 Ni1 114.5(4) . . ?
 C39 N6 Ni1 127.6(4) . . ?
 C39 N6 C35 117.9(5) . . ?
 C40 N7 Ni2 125.1(4) . . ?
 C40 N7 C44 118.0(5) . . ?
 C44 N7 Ni2 113.7(4) . . ?
 C45 N8 Ni2 115.2(4) . . ?
 C49 N8 Ni2 127.2(4) . . ?
 C49 N8 C45 117.5(5) . . ?
 C50 N9 Ni2 125.3(5) . . ?
 C54 N9 Ni2 115.9(5) . . ?
 C54 N9 C50 118.8(6) . . ?
 C55 N10 Ni2 115.6(5) . . ?
 C59 N10 Ni2 125.9(4) . . ?
 C59 N10 C55 118.3(6) . . ?
 N1 C1 N2 114.7(5) . . ?
 N1 C1 H1 122.7 . . ?
 N2 C1 H1 122.7 . . ?
 N1 C2 C3 106.0(5) . . ?
 N1 C2 C4 122.8(5) . . ?
 C3 C2 C4 131.1(5) . . ?
 N2 C3 C2 109.2(4) . . ?
 N2 C3 C12 118.7(5) . . ?
 C2 C3 C12 131.9(5) . . ?
 C5 C4 C2 119.1(5) . . ?
 C5 C4 C9 118.4(5) . . ?
 C9 C4 C2 122.5(5) . . ?
 C4 C5 H5 117.9 . . ?
 C6 C5 C4 124.3(5) . . ?
 C6 C5 H5 117.9 . . ?
 C5 C6 C7 117.1(5) . . ?
 C5 C6 C10 122.8(5) . . ?
 C7 C6 C10 120.1(6) . . ?
 C6 C7 H7 119.8 . . ?
 C8 C7 C6 120.5(6) . . ?
 C8 C7 H7 119.8 . . ?
 C7 C8 H8 119.0 . . ?
 C7 C8 C9 122.0(5) . . ?
 C9 C8 H8 119.0 . . ?
 O1 C9 C4 123.9(5) . . ?
 O1 C9 C8 118.6(5) . . ?
 C8 C9 C4 117.6(5) . . ?
 C6 C10 H10A 108.7 . . ?
 C6 C10 H10B 108.7 . . ?
 H10A C10 H10B 107.6 . . ?
 C11 C10 C6 114.2(5) . . ?
 C11 C10 H10A 108.7 . . ?
 C11 C10 H10B 108.7 . . ?
 C10 C11 H11A 109.5 . . ?
 C10 C11 H11B 109.5 . . ?
 C10 C11 H11C 109.5 . . ?
 H11A C11 H11B 109.5 . . ?
 H11A C11 H11C 109.5 . . ?
 H11B C11 H11C 109.5 . . ?
 C13 C12 C3 120.1(5) . . ?
 C13 C12 C17 119.5(5) . . ?
 C17 C12 C3 120.1(5) . . ?
 C12 C13 H13 118.5 . . ?
 C14 C13 C12 122.9(5) . . ?
 C14 C13 H13 118.5 . . ?
 C13 C14 C15 116.4(5) . . ?
 C13 C14 C18 121.7(5) . . ?
 C15 C14 C18 121.8(5) . . ?
 C14 C15 H15 119.0 . . ?
 C16 C15 C14 122.0(5) . . ?
 C16 C15 H15 119.0 . . ?
 C15 C16 H16 119.3 . . ?
 C15 C16 C17 121.4(5) . . ?
 C17 C16 H16 119.3 . . ?
 O2 C17 C12 121.4(4) . . ?
 O2 C17 C16 120.8(5) . . ?
 C16 C17 C12 117.7(5) . . ?
 C14 C18 H18A 108.8 . . ?
 C14 C18 H18B 108.8 . . ?
 C14 C18 C19 113.9(5) . . ?
 H18A C18 H18B 107.7 . . ?
 C19 C18 H18A 108.8 . . ?
 C19 C18 H18B 108.8 . . ?
 C18 C19 H19A 109.5 . . ?
 C18 C19 H19B 109.5 . . ?
 C18 C19 H19C 109.5 . . ?
 H19A C19 H19B 109.5 . . ?
 H19A C19 H19C 109.5 . . ?
 H19B C19 H19C 109.5 . . ?
 N3 C20 H20 118.8 . . ?
 N3 C20 C21 122.3(5) . . ?
 C21 C20 H20 118.8 . . ?
 C20 C21 H21 120.3 . . ?
 C20 C21 C22 119.5(5) . . ?
 C22 C21 H21 120.3 . . ?
 C21 C22 H22 120.5 . . ?
 C21 C22 C23 118.9(6) . . ?
 C23 C22 H22 120.5 . . ?
 C22 C23 H23 120.5 . . ?
 C24 C23 C22 119.0(6) . . ?
 C24 C23 H23 120.5 . . ?
 N3 C24 C23 121.2(5) . . ?
 N3 C24 C25 115.5(5) . . ?
 C23 C24 C25 123.2(5) . . ?
 N4 C25 C24 115.0(5) . . ?
 N4 C25 C26 122.5(5) . . ?
 C26 C25 C24 122.5(5) . . ?
 C25 C26 H26 120.7 . . ?
 C25 C26 C27 118.7(6) . . ?
 C27 C26 H26 120.7 . . ?
 C26 C27 H27 120.3 . . ?
 C28 C27 C26 119.4(6) . . ?
 C28 C27 H27 120.3 . . ?
 C27 C28 H28 120.8 . . ?
 C27 C28 C29 118.3(6) . . ?
 C29 C28 H28 120.8 . . ?
 N4 C29 C28 122.7(6) . . ?
 N4 C29 H29 118.6 . . ?
 C28 C29 H29 118.6 . . ?
 N5 C30 H30 118.6 . . ?
 N5 C30 C31 122.9(6) . . ?
 C31 C30 H30 118.6 . . ?
 C30 C31 H31 121.2 . . ?
 C32 C31 C30 117.7(6) . . ?
 C32 C31 H31 121.2 . . ?
 C31 C32 H32 119.7 . . ?
 C31 C32 C33 120.6(6) . . ?
 C33 C32 H32 119.7 . . ?
 C32 C33 H33 120.7 . . ?
 C32 C33 C34 118.5(6) . . ?
 C34 C33 H33 120.7 . . ?
 N5 C34 C33 121.7(6) . . ?
 N5 C34 C35 116.2(5) . . ?
 C33 C34 C35 122.0(6) . . ?
 N6 C35 C34 114.8(5) . . ?
 N6 C35 C36 122.0(5) . . ?
 C36 C35 C34 123.2(6) . . ?
 C35 C36 H36 120.6 . . ?
 C37 C36 C35 118.7(6) . . ?
 C37 C36 H36 120.6 . . ?
 C36 C37 H37 120.5 . . ?
 C36 C37 C38 119.0(6) . . ?
 C38 C37 H37 120.5 . . ?
 C37 C38 H38 120.7 . . ?
 C39 C38 C37 118.6(6) . . ?
 C39 C38 H38 120.7 . . ?
 N6 C39 C38 123.6(6) . . ?
 N6 C39 H39 118.2 . . ?
 C38 C39 H39 118.2 . . ?
 N7 C40 H40 118.2 . . ?
 N7 C40 C41 123.6(6) . . ?
 C41 C40 H40 118.2 . . ?
 C40 C41 H41 121.0 . . ?
 C42 C41 C40 118.0(6) . . ?
 C42 C41 H41 121.0 . . ?
 C41 C42 H42 119.8 . . ?
 C41 C42 C43 120.4(6) . . ?
 C43 C42 H42 119.8 . . ?
 C42 C43 H43 120.4 . . ?
 C42 C43 C44 119.2(6) . . ?
 C44 C43 H43 120.4 . . ?
 N7 C44 C43 120.8(6) . . ?
 N7 C44 C45 114.9(5) . . ?
 C43 C44 C45 124.3(5) . . ?
 N8 C45 C44 115.3(5) . . ?
 N8 C45 C46 121.3(6) . . ?
 C46 C45 C44 123.4(6) . . ?
 C45 C46 H46 120.0 . . ?
 C47 C46 C45 119.9(7) . . ?
 C47 C46 H46 120.0 . . ?
 C46 C47 H47 120.0 . . ?
 C46 C47 C48 120.0(6) . . ?
 C48 C47 H47 120.0 . . ?
 C47 C48 H48 121.5 . . ?
 C49 C48 C47 117.0(7) . . ?
 C49 C48 H48 121.5 . . ?
 N8 C49 C48 124.2(7) . . ?
 N8 C49 H49 117.9 . . ?
 C48 C49 H49 117.9 . . ?
 N9 C50 H50 119.1 . . ?
 N9 C50 C51 121.9(8) . . ?
 C51 C50 H50 119.1 . . ?
 C50 C51 H51 119.6 . . ?
 C52 C51 C50 120.8(10) . . ?
 C52 C51 H51 119.6 . . ?
 C51 C52 H52 121.1 . . ?
 C51 C52 C53 117.9(8) . . ?
 C53 C52 H52 121.1 . . ?
 C52 C53 H53 119.8 . . ?
 C52 C53 C54 120.3(9) . . ?
 C54 C53 H53 119.8 . . ?
 N9 C54 C53 120.3(8) . . ?
 N9 C54 C55 115.1(6) . . ?
 C53 C54 C55 124.5(8) . . ?
 N10 C55 C54 114.7(6) . . ?
 N10 C55 C56 120.0(8) . . ?
 C56 C55 C54 125.3(7) . . ?
 C55 C56 H56 119.8 . . ?
 C57 C56 C55 120.5(7) . . ?
 C57 C56 H56 119.8 . . ?
 C56 C57 H57 120.1 . . ?
 C56 C57 C58 119.9(7) . . ?
 C58 C57 H57 120.1 . . ?
 C57 C58 H58 121.4 . . ?
 C59 C58 C57 117.2(8) . . ?
 C59 C58 H58 121.4 . . ?
 N10 C59 C58 124.1(7) . . ?
 N10 C59 H59 118.0 . . ?
 C58 C59 H59 118.0 . . ?
 C1S O1S H1S 109.5 . . ?
 O1S C1S H1SA 109.5 . . ?
 O1S C1S H1SB 109.5 . . ?
 O1S C1S H1SC 109.5 . . ?
 H1SA C1S H1SB 109.5 . . ?
 H1SA C1S H1SC 109.5 . . ?
 H1SB C1S H1SC 109.5 . . ?
 C2S O2S H2S 109.5 . . ?
 O2S C2S H2SA 109.5 . . ?
 O2S C2S H2SB 109.5 . . ?
 O2S C2S H2SC 109.5 . . ?
 H2SA C2S H2SB 109.5 . . ?
 H2SA C2S H2SC 109.5 . . ?
 H2SB C2S H2SC 109.5 . . ?
 C5S O3S C3S 120.5(12) . . ?
 O3S C3S H3SA 109.0 . . ?
 O3S C3S H3SB 109.0 . . ?
 O3S C3S C4S 113.0(13) . . ?
 H3SA C3S H3SB 107.8 . . ?
 C4S C3S H3SA 109.0 . . ?
 C4S C3S H3SB 109.0 . . ?
 C3S C4S H4SA 109.5 . . ?
 C3S C4S H4SB 109.5 . . ?
 C3S C4S H4SC 109.5 . . ?
 H4SA C4S H4SB 109.5 . . ?
 H4SA C4S H4SC 109.5 . . ?
 H4SB C4S H4SC 109.5 . . ?
 O3S C5S H5SA 105.9 . . ?
 O3S C5S H5SB 105.9 . . ?
 H5SA C5S H5SB 106.2 . . ?
 C6S C5S O3S 125.6(16) . . ?
 C6S C5S H5SA 105.9 . . ?
 C6S C5S H5SB 105.9 . . ?
 C5S C6S H6SA 109.5 . . ?
 C5S C6S H6SB 109.5 . . ?
 C5S C6S H6SC 109.5 . . ?
 H6SA C6S H6SB 109.5 . . ?
 H6SA C6S H6SC 109.5 . . ?
 H6SB C6S H6SC 109.5 . . ?

loop_
  _geom_torsion_atom_site_label_1
  _geom_torsion_atom_site_label_2
  _geom_torsion_atom_site_label_3
  _geom_torsion_atom_site_label_4
  _geom_torsion
  _geom_torsion_site_symmetry_1
  _geom_torsion_site_symmetry_2
  _geom_torsion_site_symmetry_3
  _geom_torsion_site_symmetry_4
  _geom_torsion_publ_flag
 Ni1 O1 C9 C4 -38.0(7) . . . . ?
 Ni1 O1 C9 C8 142.9(4) . . . . ?
 Ni1 N1 C1 N2 -179.5(4) . . . . ?
 Ni1 N1 C2 C3 179.1(3) . . . . ?
 Ni1 N1 C2 C4 -3.4(7) . . . . ?
 Ni1 N3 C20 C21 174.6(4) . . . . ?
 Ni1 N3 C24 C23 -177.0(4) . . . . ?
 Ni1 N3 C24 C25 0.0(6) . . . . ?
 Ni1 N4 C25 C24 15.2(6) . . . . ?
 Ni1 N4 C25 C26 -167.5(4) . . . . ?
 Ni1 N4 C29 C28 166.5(4) . . . . ?
 Ni1 N5 C30 C31 179.1(4) . . . . ?
 Ni1 N5 C34 C33 -178.7(5) . . . . ?
 Ni1 N5 C34 C35 -1.7(6) . . . . ?
 Ni1 N6 C35 C34 8.3(6) . . . . ?
 Ni1 N6 C35 C36 -173.2(4) . . . . ?
 Ni1 N6 C39 C38 174.7(4) . . . . ?
 Ni2 O2 C17 C12 -53.4(6) . . . . ?
 Ni2 O2 C17 C16 123.7(5) . . . . ?
 Ni2 N2 C1 N1 -151.6(4) . . . . ?
 Ni2 N2 C3 C2 152.9(4) . . . . ?
 Ni2 N2 C3 C12 -30.9(6) . . . . ?
 Ni2 N7 C40 C41 -158.0(5) . . . . ?
 Ni2 N7 C44 C43 160.7(5) . . . . ?
 Ni2 N7 C44 C45 -18.5(6) . . . . ?
 Ni2 N8 C45 C44 0.1(7) . . . . ?
 Ni2 N8 C45 C46 -177.7(5) . . . . ?
 Ni2 N8 C49 C48 179.2(6) . . . . ?
 Ni2 N9 C50 C51 176.8(6) . . . . ?
 Ni2 N9 C54 C53 -177.8(5) . . . . ?
 Ni2 N9 C54 C55 0.6(7) . . . . ?
 Ni2 N10 C55 C54 -4.8(7) . . . . ?
 Ni2 N10 C55 C56 174.7(5) . . . . ?
 Ni2 N10 C59 C58 -175.1(5) . . . . ?
 N1 C2 C3 N2 1.3(6) . . . . ?
 N1 C2 C3 C12 -174.3(5) . . . . ?
 N1 C2 C4 C5 -160.1(5) . . . . ?
 N1 C2 C4 C9 20.4(8) . . . . ?
 N2 C3 C12 C13 -129.0(6) . . . . ?
 N2 C3 C12 C17 45.2(7) . . . . ?
 N3 C20 C21 C22 1.9(9) . . . . ?
 N3 C24 C25 N4 -10.4(7) . . . . ?
 N3 C24 C25 C26 172.3(5) . . . . ?
 N4 C25 C26 C27 -1.5(9) . . . . ?
 N5 C30 C31 C32 1.1(9) . . . . ?
 N5 C34 C35 N6 -4.5(7) . . . . ?
 N5 C34 C35 C36 177.0(5) . . . . ?
 N6 C35 C36 C37 -3.3(9) . . . . ?
 N7 C40 C41 C42 0.2(10) . . . . ?
 N7 C44 C45 N8 12.3(8) . . . . ?
 N7 C44 C45 C46 -170.0(6) . . . . ?
 N8 C45 C46 C47 -0.8(10) . . . . ?
 N9 C50 C51 C52 0.2(13) . . . . ?
 N9 C54 C55 N10 2.7(8) . . . . ?
 N9 C54 C55 C56 -176.7(6) . . . . ?
 N10 C55 C56 C57 1.5(10) . . . . ?
 C1 N1 C2 C3 -1.2(6) . . . . ?
 C1 N1 C2 C4 176.2(5) . . . . ?
 C1 N2 C3 C2 -0.8(6) . . . . ?
 C1 N2 C3 C12 175.4(5) . . . . ?
 C2 N1 C1 N2 0.9(6) . . . . ?
 C2 C3 C12 C13 46.2(9) . . . . ?
 C2 C3 C12 C17 -139.6(6) . . . . ?
 C2 C4 C5 C6 -177.7(5) . . . . ?
 C2 C4 C9 O1 1.4(8) . . . . ?
 C2 C4 C9 C8 -179.5(5) . . . . ?
 C3 N2 C1 N1 -0.1(6) . . . . ?
 C3 C2 C4 C5 16.7(8) . . . . ?
 C3 C2 C4 C9 -162.8(6) . . . . ?
 C3 C12 C13 C14 175.0(5) . . . . ?
 C3 C12 C17 O2 1.7(8) . . . . ?
 C3 C12 C17 C16 -175.5(5) . . . . ?
 C4 C2 C3 N2 -175.9(5) . . . . ?
 C4 C2 C3 C12 8.6(10) . . . . ?
 C4 C5 C6 C7 -2.6(8) . . . . ?
 C4 C5 C6 C10 176.4(5) . . . . ?
 C5 C4 C9 O1 -178.2(5) . . . . ?
 C5 C4 C9 C8 0.9(7) . . . . ?
 C5 C6 C7 C8 0.7(8) . . . . ?
 C5 C6 C10 C11 39.7(9) . . . . ?
 C6 C7 C8 C9 2.1(9) . . . . ?
 C7 C6 C10 C11 -141.3(7) . . . . ?
 C7 C8 C9 O1 176.3(5) . . . . ?
 C7 C8 C9 C4 -2.9(8) . . . . ?
 C9 C4 C5 C6 1.8(8) . . . . ?
 C10 C6 C7 C8 -178.4(5) . . . . ?
 C12 C13 C14 C15 0.8(9) . . . . ?
 C12 C13 C14 C18 179.4(5) . . . . ?
 C13 C12 C17 O2 176.0(5) . . . . ?
 C13 C12 C17 C16 -1.2(8) . . . . ?
 C13 C14 C15 C16 -1.9(9) . . . . ?
 C13 C14 C18 C19 -95.7(7) . . . . ?
 C14 C15 C16 C17 1.4(9) . . . . ?
 C15 C14 C18 C19 82.9(7) . . . . ?
 C15 C16 C17 O2 -177.0(5) . . . . ?
 C15 C16 C17 C12 0.2(8) . . . . ?
 C17 C12 C13 C14 0.7(9) . . . . ?
 C18 C14 C15 C16 179.5(6) . . . . ?
 C20 N3 C24 C23 -1.7(8) . . . . ?
 C20 N3 C24 C25 175.3(5) . . . . ?
 C20 C21 C22 C23 -1.6(9) . . . . ?
 C21 C22 C23 C24 -0.3(9) . . . . ?
 C22 C23 C24 N3 2.0(9) . . . . ?
 C22 C23 C24 C25 -174.7(5) . . . . ?
 C23 C24 C25 N4 166.6(5) . . . . ?
 C23 C24 C25 C26 -10.7(9) . . . . ?
 C24 N3 C20 C21 -0.3(8) . . . . ?
 C24 C25 C26 C27 175.6(5) . . . . ?
 C25 N4 C29 C28 0.0(8) . . . . ?
 C25 C26 C27 C28 1.7(10) . . . . ?
 C26 C27 C28 C29 -1.0(10) . . . . ?
 C27 C28 C29 N4 0.2(9) . . . . ?
 C29 N4 C25 C24 -176.7(5) . . . . ?
 C29 N4 C25 C26 0.6(8) . . . . ?
 C30 N5 C34 C33 1.2(8) . . . . ?
 C30 N5 C34 C35 178.2(5) . . . . ?
 C30 C31 C32 C33 -1.8(10) . . . . ?
 C31 C32 C33 C34 2.2(10) . . . . ?
 C32 C33 C34 N5 -1.9(10) . . . . ?
 C32 C33 C34 C35 -178.7(6) . . . . ?
 C33 C34 C35 N6 172.4(5) . . . . ?
 C33 C34 C35 C36 -6.1(9) . . . . ?
 C34 N5 C30 C31 -0.8(8) . . . . ?
 C34 C35 C36 C37 175.2(5) . . . . ?
 C35 N6 C39 C38 -1.8(8) . . . . ?
 C35 C36 C37 C38 0.7(9) . . . . ?
 C36 C37 C38 C39 1.2(9) . . . . ?
 C37 C38 C39 N6 -0.7(9) . . . . ?
 C39 N6 C35 C34 -174.8(5) . . . . ?
 C39 N6 C35 C36 3.8(8) . . . . ?
 C40 N7 C44 C43 -0.2(9) . . . . ?
 C40 N7 C44 C45 -179.5(5) . . . . ?
 C40 C41 C42 C43 -1.4(10) . . . . ?
 C41 C42 C43 C44 1.8(10) . . . . ?
 C42 C43 C44 N7 -1.0(10) . . . . ?
 C42 C43 C44 C45 178.2(6) . . . . ?
 C43 C44 C45 N8 -166.9(6) . . . . ?
 C43 C44 C45 C46 10.8(10) . . . . ?
 C44 N7 C40 C41 0.6(9) . . . . ?
 C44 C45 C46 C47 -178.5(7) . . . . ?
 C45 N8 C49 C48 1.7(10) . . . . ?
 C45 C46 C47 C48 -0.3(12) . . . . ?
 C46 C47 C48 C49 2.0(12) . . . . ?
 C47 C48 C49 N8 -2.7(12) . . . . ?
 C49 N8 C45 C44 178.0(6) . . . . ?
 C49 N8 C45 C46 0.2(9) . . . . ?
 C50 N9 C54 C53 0.3(9) . . . . ?
 C50 N9 C54 C55 178.6(6) . . . . ?
 C50 C51 C52 C53 1.3(14) . . . . ?
 C51 C52 C53 C54 -2.0(14) . . . . ?
 C52 C53 C54 N9 1.3(11) . . . . ?
 C52 C53 C54 C55 -176.9(8) . . . . ?
 C53 C54 C55 N10 -179.0(6) . . . . ?
 C53 C54 C55 C56 1.6(11) . . . . ?
 C54 N9 C50 C51 -1.0(10) . . . . ?
 C54 C55 C56 C57 -179.1(7) . . . . ?
 C55 N10 C59 C58 -0.6(9) . . . . ?
 C55 C56 C57 C58 -1.6(11) . . . . ?
 C56 C57 C58 C59 0.6(11) . . . . ?
 C57 C58 C59 N10 0.5(10) . . . . ?
 C59 N10 C55 C54 -179.8(5) . . . . ?
 C59 N10 C55 C56 -0.4(9) . . . . ?
 C3S O3S C5S C6S 166.7(17) . . . . ?
 C5S O3S C3S C4S -179.5(14) . . . . ?

_smtbx_masks_special_details       ?
loop_
  _smtbx_masks_void_nr
  _smtbx_masks_void_average_x
  _smtbx_masks_void_average_y
  _smtbx_masks_void_average_z
  _smtbx_masks_void_volume
  _smtbx_masks_void_count_electrons
  _smtbx_masks_void_content
 1 0.500 0.500 1.000 449.8 179.8 ?

_shelx_fab_file
;
-16 -1 1 10.2054 0.2319
-15 -7 1 -13.3119 -0.1470
-15 -6 1 14.1466 -0.3193
-15 -6 2 5.7444 -0.0375
-15 -5 1 9.8163 -0.0345
-15 -5 2 -6.6707 0.2587
-15 -4 1 -13.8415 0.3176
-15 -4 2 -26.5158 0.2407
-15 -4 3 -11.2459 -0.0710
-15 -3 1 -12.5417 0.2578
-15 -3 2 14.9475 -0.1386
-15 -3 3 40.4012 -0.1900
-15 -2 1 20.9574 -0.1974
-15 -2 2 17.1621 -0.3033
-15 -2 3 -13.0276 0.0065
-15 -1 1 -7.1626 -0.4040
-15 -1 2 -3.9799 -0.0010
-15 -1 3 -14.1092 0.2280
-15 0 1 3.2620 -0.0162
-15 0 2 -18.9755 0.3358
-15 0 3 -31.8707 0.1279
-15 1 1 2.0364 0.3509
-15 1 2 2.3307 0.2347
-15 1 3 12.5706 -0.1185
-15 2 1 -5.1586 0.2580
-15 2 2 -11.7104 -0.1773
-15 2 3 -9.7827 -0.2226
-15 3 1 2.4916 -0.2080
-15 3 2 1.6694 -0.3231
-15 4 1 -4.2398 -0.3731
-15 4 2 -0.2202 0.0193
-15 5 1 6.0980 -0.0742
-14 -10 1 -2.1088 -0.2646
-14 -9 1 5.9384 -0.2466
-14 -9 2 5.2108 0.1379
-14 -8 1 -8.0872 0.0885
-14 -8 2 -4.8950 0.2865
-14 -8 3 -5.1063 0.0790
-14 -7 1 7.4034 0.3340
-14 -7 2 11.9785 0.0832
-14 -7 3 2.3937 -0.1245
-14 -6 1 1.3475 0.0398
-14 -6 2 -4.5500 -0.2522
-14 -6 3 -7.9602 -0.1185
-14 -6 4 -4.4290 0.0197
-14 -5 1 0.3600 -0.3256
-14 -5 2 3.2437 -0.1906
-14 -5 3 2.6474 0.1069
-14 -5 4 -6.5172 0.0878
-14 -5 5 -8.7186 0.0041
-14 -4 1 10.0553 -0.2589
-14 -4 2 8.3240 0.1254
-14 -4 3 -2.1081 0.2135
-14 -4 4 -9.4845 0.0435
-14 -4 5 0.0848 -0.0039
-14 -3 1 8.9387 0.1657
-14 -3 2 -5.7640 0.3280
-14 -3 3 -18.6678 0.0722
-14 -3 4 -13.1278 -0.0719
-14 -3 5 14.0191 -0.0143
-14 -2 1 -9.6842 0.3888
-14 -2 2 -7.8880 0.0591
-14 -2 3 9.2383 -0.1973
-14 -2 4 29.9621 -0.0747
-14 -2 5 28.5486 -0.0040
-14 -1 1 3.3397 0.0546
-14 -1 2 3.2779 -0.3297
-14 -1 3 3.0371 -0.1629
-14 -1 4 0.1104 0.0749
-14 -1 5 -12.0438 -0.0096
-14 -1 6 -23.4151 -0.0299
-14 0 1 5.2390 -0.3898
-14 0 2 18.1573 -0.2737
-14 0 3 19.7517 0.1195
-14 0 4 0.0024 0.1063
-14 0 5 -31.8973 -0.0314
-14 0 6 -37.9209 0.0786
-14 1 1 2.0258 -0.2915
-14 1 2 -7.5547 0.1551
-14 1 3 -22.8659 0.2576
-14 1 4 -24.5446 0.0160
-14 1 5 -8.6878 0.0062
-14 1 6 22.4687 0.0858
-14 2 1 4.0948 0.1723
-14 2 2 2.5221 0.3391
-14 2 3 4.4785 0.0403
-14 2 4 3.2005 -0.0964
-14 2 5 -2.1880 0.0464
-14 3 1 -0.4841 0.3875
-14 3 2 -0.4839 0.0444
-14 3 3 -0.8725 -0.2072
-14 3 4 -7.0585 -0.0427
-14 3 5 -2.8267 0.0442
-14 4 1 4.0380 0.0549
-14 4 2 1.1089 -0.3288
-14 4 3 -3.9371 -0.1606
-14 4 4 -4.6250 0.0698
-14 4 5 9.2002 -0.0258
-14 5 1 -2.6063 -0.3761
-14 5 2 -1.1503 -0.2264
-14 5 3 2.2814 0.1363
-14 5 4 5.2214 0.1073
-14 6 1 0.2921 -0.2520
-14 6 2 1.7434 0.1505
-14 6 3 -0.3836 0.1990
-14 7 1 -0.6130 0.2018
-14 7 2 1.0246 0.3466
-14 8 1 0.0877 0.3871
-13 -12 1 -1.9148 -0.1098
-13 -11 1 1.1724 0.2604
-13 -11 2 4.2224 0.1537
-13 -10 1 1.8680 0.2559
-13 -10 2 1.2498 -0.1264
-13 -10 3 1.1537 -0.1522
-13 -9 1 0.9737 -0.1288
-13 -9 2 1.9808 -0.3041
-13 -9 3 5.0532 -0.0663
-13 -9 4 0.6485 0.0561
-13 -8 1 -0.5040 -0.3309
-13 -8 2 3.3811 -0.0960
-13 -8 3 2.1905 0.1233
-13 -8 4 -1.5435 0.0660
-13 -8 5 1.5561 0.0175
-13 -7 1 -1.4127 -0.0940
-13 -7 2 1.1666 0.2148
-13 -7 3 -0.4097 0.1380
-13 -7 4 -3.2671 -0.0118
-13 -7 5 -5.6151 0.0240
-13 -6 1 0.3942 0.3188
-13 -6 2 5.6605 0.2114
-13 -6 3 1.0436 -0.1087
-13 -6 4 -1.5515 -0.0845
-13 -6 5 2.4831 0.0307
-13 -6 6 3.4592 -0.0769
-13 -5 1 0.8931 0.2815
-13 -5 2 -4.1279 -0.1707
-13 -5 3 -9.5423 -0.2291
-13 -5 4 0.5164 0.0135
-13 -5 5 1.7831 -0.0013
-13 -5 6 -14.5463 -0.1063
-13 -4 1 -1.3431 -0.1758
-13 -4 2 -0.1074 -0.3475
-13 -4 3 10.3464 -0.0534
-13 -4 4 12.6265 0.0774
-13 -4 5 -7.8747 -0.0170
-13 -4 6 -12.3103 0.0364
-13 -4 7 14.1305 0.1108
-13 -3 1 1.1693 -0.4063
-13 -3 2 3.1241 -0.0844
-13 -3 3 6.7227 0.1838
-13 -3 4 -4.8109 0.0901
-13 -3 5 -17.9694 0.0355
-13 -3 6 -5.5469 0.0799
-13 -3 7 7.8053 0.0010
-13 -2 1 0.1135 -0.0688
-13 -2 2 4.1631 0.2913
-13 -2 3 -3.2109 0.1763
-13 -2 4 -20.3008 -0.0074
-13 -2 5 -11.2608 0.0353
-13 -2 6 21.9876 0.0127
-13 -2 7 26.9344 -0.0828
-13 -1 1 3.2786 0.3877
-13 -1 2 2.6550 0.2717
-13 -1 3 -2.9532 -0.0968
-13 -1 4 -1.7267 -0.1074
-13 -1 5 16.1764 0.0010
-13 -1 6 13.7360 -0.0715
-13 -1 7 -20.1434 -0.0772
-13 0 1 -3.2937 0.3107
-13 0 2 -8.3078 -0.1591
-13 0 3 -13.3602 -0.2563
-13 0 4 0.3836 -0.0132
-13 0 5 19.9570 -0.0040
-13 0 6 3.9448 -0.0951
-13 0 7 -21.7735 0.0093
-13 1 1 -1.5804 -0.1824
-13 1 2 1.3014 -0.3803
-13 1 3 9.4734 -0.0834
-13 1 4 16.1169 0.0797
-13 1 5 -2.0157 -0.0240
-13 1 6 -33.2967 0.0279
-13 1 7 -21.2744 0.1341
-13 2 1 -0.6924 -0.4105
-13 2 2 0.6359 -0.0870
-13 2 3 -1.9251 0.2037
-13 2 4 -4.8183 0.0859
-13 2 5 -13.4480 -0.0042
-13 2 6 -19.0848 0.0926
-13 2 7 -4.3700 0.0399
-13 3 1 -0.2393 -0.0422
-13 3 2 -2.8554 0.3248
-13 3 3 -2.8995 0.1853
-13 3 4 -0.1485 -0.0460
-13 3 5 -5.7998 0.0237
-13 3 6 -2.3522 0.0666
-13 3 7 25.3272 -0.0790
-13 4 1 -0.7665 0.3798
-13 4 2 -0.4124 0.2464
-13 4 3 4.2343 -0.1231
-13 4 4 3.6592 -0.1103
-13 4 5 -3.9184 0.0347
-13 4 6 0.6444 -0.0468
-13 4 7 10.9156 -0.0985
-13 5 1 0.7417 0.3156
-13 5 2 0.5823 -0.1622
-13 5 3 -0.8550 -0.2413
-13 5 4 -5.5342 -0.0131
-13 5 5 -6.1699 -0.0196
-13 5 6 1.8275 -0.1170
-13 6 1 1.5475 -0.2025
-13 6 2 0.5492 -0.3584
-13 6 3 0.4422 -0.0325
-13 6 4 2.0768 0.0961
-13 6 5 4.4845 -0.0173
-13 6 6 5.7406 0.0262
-13 7 1 -0.1061 -0.3796
-13 7 2 -2.7679 -0.0320
-13 7 3 -1.3058 0.2002
-13 7 4 1.1319 0.0107
-13 7 5 -0.0387 -0.0587
-13 8 1 -2.4899 -0.0387
-13 8 2 -1.6571 0.3241
-13 8 3 0.6004 0.1507
-13 8 4 0.7156 -0.0768
-13 9 1 -1.8042 0.3716
-13 9 2 -0.6403 0.2524
-13 9 3 1.1659 -0.1332
-13 10 1 2.0409 0.3160
-12 -13 1 -3.2590 0.0921
-12 -12 1 -0.7908 -0.2447
-12 -12 2 1.9707 -0.1489
-12 -12 3 1.3901 0.0262
-12 -11 1 -0.7008 -0.2777
-12 -11 2 1.0704 0.0606
-12 -11 3 3.4495 0.1139
-12 -11 4 4.0258 -0.0181
-12 -10 1 0.7467 0.1131
-12 -10 2 -0.3916 0.3168
-12 -10 3 -1.4909 0.0816
-12 -10 4 -3.6180 -0.0536
-12 -10 5 -0.7184 0.0486
-12 -9 1 -2.8130 0.3971
-12 -9 2 -0.9257 0.1326
-12 -9 3 0.0516 -0.1389
-12 -9 4 2.0840 -0.0444
-12 -9 5 4.1558 0.0539
-12 -9 6 -0.8406 -0.0196
-12 -8 1 1.8434 0.1399
-12 -8 2 0.2193 -0.2200
-12 -8 3 3.2775 -0.1391
-12 -8 4 5.4459 0.0216
-12 -8 5 0.7110 -0.0339
-12 -8 6 -3.6465 -0.0520
-12 -7 1 -0.0197 -0.3187
-12 -7 2 1.5834 -0.2396
-12 -7 3 4.9666 0.0516
-12 -7 4 0.6574 0.0564
-12 -7 5 -2.1834 -0.0056
-12 -7 6 3.0464 0.0647
-12 -7 7 4.5528 0.0554
-12 -6 1 -4.3607 -0.3073
-12 -6 2 -2.1719 0.1281
-12 -6 3 -0.3160 0.2252
-12 -6 4 -2.3022 0.0264
-12 -6 5 -1.1084 0.0034
-12 -6 6 -1.8306 0.0618
-12 -6 7 -8.2208 -0.0108
-12 -6 8 -8.6875 -0.0829
-12 -5 1 -0.7961 0.1556
-12 -5 2 6.0638 0.3730
-12 -5 3 6.7108 0.0638
-12 -5 4 -0.5617 -0.1191
-12 -5 5 -2.3411 -0.0102
-12 -5 6 0.0959 -0.0072
-12 -5 7 2.5227 -0.1007
-12 -5 8 5.8462 -0.0758
-12 -4 1 -0.8070 0.4440
-12 -4 2 1.3122 0.1143
-12 -4 3 -7.6378 -0.2101
-12 -4 4 -6.6051 -0.0936
-12 -4 5 6.3913 0.0139
-12 -4 6 5.8071 -0.0786
-12 -4 7 -6.0375 -0.0707
-12 -4 8 -8.5848 0.0146
-12 -3 1 -1.7538 0.1232
-12 -3 2 -0.8229 -0.3031
-12 -3 3 0.4032 -0.2142
-12 -3 4 8.8403 0.0115
-12 -3 5 4.6494 -0.0314
-12 -3 6 -8.9694 -0.0469
-12 -3 7 -5.0042 0.0738
-12 -3 8 5.5384 0.0719
-12 -3 9 -1.6194 0.0169
-12 -2 1 4.8169 -0.3813
-12 -2 2 1.4372 -0.2753
-12 -2 3 4.9344 0.0912
-12 -2 4 8.1040 0.0971
-12 -2 5 -2.9996 -0.0140
-12 -2 6 -8.7728 0.0844
-12 -2 7 -1.8540 0.1263
-12 -2 8 0.6612 0.0173
-12 -2 9 6.2236 0.0069
-12 -1 1 -1.0444 -0.3306
-12 -1 2 2.6245 0.1496
-12 -1 3 6.6615 0.2451
-12 -1 4 -2.9640 0.0241
-12 -1 5 -11.5929 0.0281
-12 -1 6 2.8364 0.1129
-12 -1 7 13.6348 0.0066
-12 -1 8 -0.9573 -0.0704
-12 -1 9 -17.1590 -0.0120
-12 0 1 1.1504 0.2095
-12 0 2 3.7801 0.4111
-12 0 3 3.1544 0.0716
-12 0 4 -6.3923 -0.1046
-12 0 5 -5.4578 0.0173
-12 0 6 4.0860 0.0024
-12 0 7 -3.7106 -0.0999
-12 0 8 -10.4639 -0.0617
-12 0 9 8.6383 -0.0176
-12 1 1 3.3353 0.4627
-12 1 2 5.8765 0.1076
-12 1 3 -3.6724 -0.2160
-12 1 4 -9.0263 -0.0853
-12 1 5 7.5565 0.0158
-12 1 6 13.0632 -0.0883
-12 1 7 -9.5648 -0.0719
-12 1 8 -18.6595 0.0206
-12 1 9 -6.7318 -0.0006
-12 2 1 2.1497 0.0937
-12 2 2 -1.4268 -0.3241
-12 2 3 -3.8177 -0.2160
-12 2 4 3.5749 0.0299
-12 2 5 6.1411 -0.0154
-12 2 6 -11.2429 -0.0438
-12 2 7 -16.6951 0.0763
-12 2 8 4.1917 0.0715
-12 2 9 8.6283 0.0063
-12 3 1 0.3373 -0.3929
-12 3 2 -0.1038 -0.2888
-12 3 3 -0.9946 0.0789
-12 3 4 -0.9424 0.0980
-12 3 5 -4.4648 -0.0333
-12 3 6 -9.1060 0.0473
-12 3 7 -6.3464 0.0984
-12 3 8 -5.1155 -0.0124
-12 3 9 -2.8273 -0.0163
-12 4 1 0.2183 -0.3266
-12 4 2 0.0124 0.1556
-12 4 3 -1.8291 0.2765
-12 4 4 -3.5262 0.0494
-12 4 5 -5.8785 0.0121
-12 4 6 -5.5211 0.0995
-12 4 7 0.0802 -0.0032
-12 4 8 5.5934 -0.1080
-12 4 9 11.5173 -0.0343
-12 5 1 2.0686 0.2024
-12 5 2 0.7246 0.3870
-12 5 3 -1.5108 0.0531
-12 5 4 -1.3151 -0.1242
-12 5 5 1.6313 0.0023
-12 5 6 6.1059 0.0094
-12 5 7 4.1726 -0.0991
-12 5 8 -2.5354 -0.0382
-12 6 1 -0.2687 0.4233
-12 6 2 -1.4733 0.0958
-12 6 3 -1.0668 -0.1999
-12 6 4 0.0067 -0.0828
-12 6 5 3.0180 -0.0048
-12 6 6 3.0587 -0.1078
-12 6 7 -4.1200 -0.0872
-12 6 8 -1.4920 0.0435
-12 7 1 1.3960 0.0723
-12 7 2 2.0261 -0.3290
-12 7 3 -0.6166 -0.1976
-12 7 4 -1.7269 0.0429
-12 7 5 1.8800 0.0005
-12 7 6 -1.3475 -0.0319
-12 7 7 -8.9775 0.0488
-12 8 1 1.3240 -0.3682
-12 8 2 0.2015 -0.2522
-12 8 3 -0.6127 0.0942
-12 8 4 2.9741 0.0735
-12 8 5 4.7405 -0.0506
-12 8 6 -2.5676 0.0401
-12 9 1 0.2434 -0.2805
-12 9 2 -1.6514 0.1600
-12 9 3 -3.0789 0.2396
-12 9 4 -1.8801 0.0217
-12 9 5 -1.5193 0.0032
-12 9 6 -4.1004 0.0558
-12 10 1 -3.2014 0.1567
-12 10 2 -0.1796 0.3306
-12 10 3 1.6962 0.0532
-12 10 4 2.8448 -0.0641
-12 11 1 2.1497 0.4027
-12 11 2 0.6957 0.0741
-11 -14 1 1.9527 -0.1254
-11 -14 2 -0.2606 0.1256
-11 -13 1 2.4547 0.2291
-11 -13 2 0.9588 0.2075
-11 -13 3 -1.4365 0.0464
-11 -12 1 -0.3405 0.2775
-11 -12 2 -4.4563 -0.0570
-11 -12 3 -1.4968 -0.1609
-11 -12 4 4.7908 -0.0738
-11 -11 1 0.2342 -0.1197
-11 -11 2 -0.9681 -0.2952
-11 -11 3 0.8478 -0.0895
-11 -11 4 0.0795 0.0282
-11 -11 5 -1.9319 -0.0324
-11 -10 1 -3.3247 -0.3906
-11 -10 2 0.1244 -0.1622
-11 -10 3 3.6592 0.0892
-11 -10 4 2.7581 0.0713
-11 -10 5 -1.1759 0.0268
-11 -10 6 -5.4517 0.0770
-11 -9 1 3.5240 -0.1699
-11 -9 2 1.8838 0.1979
-11 -9 3 -0.2581 0.1909
-11 -9 4 -1.4241 0.0256
-11 -9 5 -0.0721 -0.0017
-11 -9 6 3.8903 0.0171
-11 -9 7 7.1963 -0.0002
-11 -8 1 -0.8513 0.2958
-11 -8 2 -0.2214 0.2754
-11 -8 3 0.0921 -0.0176
-11 -8 4 0.0795 -0.0595
-11 -8 5 0.5986 0.0343
-11 -8 6 -0.4185 0.0124
-11 -8 7 -3.9884 -0.0154
-11 -8 8 -6.4841 0.0257
-11 -7 1 -0.4336 0.3489
-11 -7 2 -2.3880 -0.0716
-11 -7 3 -2.4269 -0.1860
-11 -7 4 1.3741 -0.0124
-11 -7 5 1.5781 0.0003
-11 -7 6 -2.5890 -0.0574
-11 -7 7 -2.4313 0.0140
-11 -7 8 2.8382 0.0612
-11 -6 1 3.1698 -0.1267
-11 -6 2 1.5164 -0.3493
-11 -6 3 4.0691 -0.0793
-11 -6 4 3.9759 0.0743
-11 -6 5 -1.9177 -0.0095
-11 -6 6 -2.3965 -0.0038
-11 -6 7 2.7869 0.0544
-11 -6 8 1.8258 0.0289
-11 -6 9 -2.0529 0.0064
-11 -5 1 -0.5114 -0.4435
-11 -5 2 -1.7554 -0.1408
-11 -5 3 -0.1275 0.1742
-11 -5 4 -0.7119 0.0924
-11 -5 5 0.0271 0.0021
-11 -5 6 3.7477 0.0654
-11 -5 7 1.3371 0.0624
-11 -5 8 -5.0562 -0.0043
-11 -5 9 -2.5156 -0.0317
-11 -4 1 -1.5428 -0.1546
-11 -4 2 -3.5341 0.2835
-11 -4 3 0.8496 0.2229
-11 -4 4 0.9642 -0.0088
-11 -4 5 -2.7013 0.0016
-11 -4 6 -5.0711 0.0269
-11 -4 7 -4.2101 -0.0537
-11 -4 8 1.7338 -0.0597
-11 -4 9 8.6701 -0.0128
-11 -4 10 5.6844 -0.0317
-11 -3 1 -2.6173 0.3541
-11 -3 2 0.7537 0.3141
-11 -3 3 2.0242 -0.0436
-11 -3 4 -0.9590 -0.1012
-11 -3 5 1.9169 0.0010
-11 -3 6 5.8294 -0.0575
-11 -3 7 2.7256 -0.0923
-11 -3 8 -0.3458 -0.0149
-11 -3 9 2.9726 -0.0092
-11 -3 10 4.5953 -0.0419
-11 -2 1 -3.3650 0.3655
-11 -2 2 1.1672 -0.1217
-11 -2 3 2.1177 -0.2739
-11 -2 4 2.6211 -0.0594
-11 -2 5 2.1828 -0.0142
-11 -2 6 -2.4093 -0.0912
-11 -2 7 -1.0661 -0.0180
-11 -2 8 5.7734 0.0535
-11 -2 9 0.3651 0.0236
-11 -2 10 -18.2898 0.0479
-11 -1 1 -1.6226 -0.1788
-11 -1 2 -1.9450 -0.3982
-11 -1 3 -1.3902 -0.0723
-11 -1 4 2.7242 0.1057
-11 -1 5 0.8638 -0.0237
-11 -1 6 -2.5608 -0.0253
-11 -1 7 1.0672 0.0909
-11 -1 8 3.0212 0.0741
-11 -1 9 3.1689 0.0269
-11 -1 10 10.9296 0.0523
-11 0 1 2.6612 -0.4977
-11 0 2 4.6047 -0.1285
-11 0 3 7.1025 0.2220
-11 0 4 4.1774 0.1030
-11 0 5 -1.0182 -0.0083
-11 0 6 5.9010 0.0925
-11 0 7 12.8921 0.0999
-11 0 8 2.1050 0.0098
-11 0 9 -13.3312 0.0051
-11 0 10 -20.3127 0.0057
-11 0 11 -19.1752 -0.0651
-11 1 1 -1.8714 -0.1329
-11 1 2 -2.5894 0.3365
-11 1 3 1.9976 0.2315
-11 1 4 1.4186 -0.0418
-11 1 5 -1.1344 -0.0004
-11 1 6 0.9482 0.0593
-11 1 7 -4.3329 -0.0342
-11 1 8 -12.6392 -0.0549
-11 1 9 -6.1736 -0.0114
-11 1 10 6.0733 -0.0373
-11 1 11 9.9945 -0.0574
-11 2 1 -3.8016 0.4020
-11 2 2 2.4240 0.3466
-11 2 3 3.2724 -0.0596
-11 2 4 -3.2904 -0.1151
-11 2 5 2.3590 0.0136
-11 2 6 11.0416 -0.0562
-11 2 7 0.0906 -0.1070
-11 2 8 -8.0852 -0.0254
-11 2 9 4.0704 -0.0222
-11 2 10 7.0934 -0.0593
-11 2 11 -10.3817 -0.0037
-11 3 1 1.5005 0.3534
-11 3 2 4.4985 -0.1452
-11 3 3 2.2373 -0.2808
-11 3 4 3.2110 -0.0325
-11 3 5 6.6917 0.0161
-11 3 6 -6.2926 -0.0749
-11 3 7 -18.4823 0.0084
-11 3 8 -3.3321 0.0751
-11 3 9 3.2627 0.0065
-11 3 10 -22.0289 0.0114
-11 4 1 -0.7306 -0.1787
-11 4 2 0.2849 -0.3781
-11 4 3 -0.7478 -0.0771
-11 4 4 1.1692 0.0875
-11 4 5 -2.0779 -0.0382
-11 4 6 -9.9608 -0.0270
-11 4 7 -2.3113 0.0995
-11 4 8 8.2290 0.0517
-11 4 9 -4.3498 -0.0168
-11 4 10 -9.2422 0.0549
-11 5 1 0.1602 -0.4681
-11 5 2 -0.0537 -0.1078
-11 5 3 1.2654 0.2264
-11 5 4 1.2333 0.1229
-11 5 5 -4.9459 -0.0000
-11 5 6 -5.1506 0.0793
-11 5 7 6.2854 0.0712
-11 5 8 5.9010 -0.0544
-11 5 9 -8.0616 -0.0454
-11 5 10 -6.5001 0.0102
-11 6 1 0.9496 -0.0827
-11 6 2 2.4866 0.3149
-11 6 3 1.4124 0.1936
-11 6 4 -3.3335 -0.0558
-11 6 5 -7.3057 -0.0132
-11 6 6 -0.4587 0.0604
-11 6 7 6.5845 -0.0336
-11 6 8 -2.8717 -0.0783
-11 6 9 -9.6939 -0.0027
-11 6 10 6.0547 -0.0125
-11 7 1 1.3852 0.3657
-11 7 2 -0.1632 0.2936
-11 7 3 -0.0202 -0.0721
-11 7 4 -0.0918 -0.1118
-11 7 5 1.7081 -0.0046
-11 7 6 8.5896 -0.0692
-11 7 7 7.2910 -0.1204
-11 7 8 -3.5706 -0.0212
-11 7 9 -3.5257 0.0482
-11 8 1 0.2587 0.3023
-11 8 2 -0.5357 -0.1501
-11 8 3 -0.8479 -0.2408
-11 8 4 -3.2021 -0.0116
-11 8 5 -0.2208 0.0103
-11 8 6 5.4173 -0.0695
-11 8 7 -0.7105 -0.0002
-11 8 8 -8.5848 0.0606
-11 9 1 -0.2213 -0.1946
-11 9 2 1.0037 -0.3669
-11 9 3 2.3396 -0.0755
-11 9 4 2.3913 0.0508
-11 9 5 3.4588 -0.0503
-11 9 6 0.2241 0.0003
-11 9 7 -6.4138 0.1085
-11 9 8 -2.5374 0.0705
-11 10 1 0.4605 -0.3772
-11 10 2 -1.0840 -0.0532
-11 10 3 -2.1344 0.1999
-11 10 4 -2.5264 0.0803
-11 10 5 -0.5676 0.0166
-11 10 6 0.3911 0.0892
-11 10 7 0.8085 0.0407
-11 11 1 -2.8353 -0.0561
-11 11 2 -0.6519 0.2841
-11 11 3 1.9698 0.1564
-11 11 4 0.8189 -0.0271
-11 11 5 -1.2733 0.0370
-11 12 1 -2.2407 0.3275
-11 12 2 0.3625 0.2345
-11 12 3 -0.3373 -0.0982
-11 12 4 -1.7314 -0.0583
-10 -15 1 -3.3333 0.1648
-10 -15 2 -1.3973 -0.1688
-10 -14 1 -3.1118 -0.2008
-10 -14 2 0.9827 -0.2433
-10 -14 3 4.3891 -0.0414
-10 -13 1 -2.1591 -0.2653
-10 -13 2 -1.5597 0.0398
-10 -13 3 -2.0198 0.1480
-10 -13 4 -4.5219 0.0588
-10 -13 5 -4.7943 0.0863
-10 -12 1 1.3770 0.0752
-10 -12 2 4.6568 0.2634
-10 -12 3 3.0208 0.1010
-10 -12 4 -0.5673 0.0000
-10 -12 5 0.2166 0.0533
-10 -12 6 3.3607 -0.0008
-10 -11 1 -1.5814 0.3979
-10 -11 2 -2.2548 0.1657
-10 -11 3 -3.0984 -0.1066
-10 -11 4 0.2168 -0.0917
-10 -11 5 3.0683 -0.0480
-10 -11 6 0.2120 -0.1112
-10 -11 7 -3.9470 -0.1140
-10 -10 1 2.0100 0.1528
-10 -10 2 0.1464 -0.2113
-10 -10 3 0.0284 -0.1981
-10 -10 4 1.4730 -0.0586
-10 -10 5 1.3489 -0.0585
-10 -10 6 2.6369 -0.0565
-10 -10 7 5.2371 -0.0020
-10 -10 8 4.3931 0.0066
-10 -9 1 -2.3824 -0.2874
-10 -9 2 -1.7632 -0.2781
-10 -9 3 1.5718 -0.0333
-10 -9 4 2.2185 0.0250
-10 -9 5 0.3481 0.0074
-10 -9 6 -1.2792 0.0586
-10 -9 7 -3.6979 0.0573
-10 -9 8 -4.3248 0.0150
-10 -8 1 -1.4814 -0.3440
-10 -8 2 0.5493 0.0374
-10 -8 3 1.1558 0.1731
-10 -8 4 0.2544 0.0541
-10 -8 5 1.1181 0.0323
-10 -8 6 2.3038 0.0620
-10 -8 7 1.9215 0.0048
-10 -8 8 1.6461 -0.0297
-10 -8 9 -0.8689 0.0182
-10 -7 1 1.3605 0.1128
-10 -7 2 2.3257 0.3350
-10 -7 3 1.5674 0.1008
-10 -7 4 1.1239 -0.0485
-10 -7 5 2.1549 0.0190
-10 -7 6 0.8408 0.0066
-10 -7 7 -3.0683 -0.0758
-10 -7 8 -6.3369 -0.0501
-10 -7 9 -8.0023 0.0249
-10 -7 10 -2.8424 0.0261
-10 -6 1 -0.4628 0.4460
-10 -6 2 0.3479 0.1520
-10 -6 3 -1.0734 -0.1578
-10 -6 4 0.0844 -0.0932
-10 -6 5 1.7266 -0.0095
-10 -6 6 -1.0873 -0.0589
-10 -6 7 -2.6878 -0.0430
-10 -6 8 0.5085 0.0272
-10 -6 9 2.4766 0.0267
-10 -6 10 3.2235 0.0112
-10 -5 1 -0.0008 0.1643
-10 -5 2 -2.5159 -0.2589
-10 -5 3 -2.4659 -0.1980
-10 -5 4 2.2722 0.0170
-10 -5 5 1.5538 0.0071
-10 -5 6 -3.5769 -0.0242
-10 -5 7 -2.5225 0.0257
-10 -5 8 0.4753 0.0371
-10 -5 9 0.1066 0.0314
-10 -5 10 5.8094 0.0543
-10 -5 11 13.6022 0.0522
-10 -4 1 2.1586 -0.3484
-10 -4 2 2.5803 -0.3191
-10 -4 3 3.2438 0.0281
-10 -4 4 1.2726 0.0806
-10 -4 5 -3.2805 -0.0134
-10 -4 6 -2.0302 0.0370
-10 -4 7 2.3575 0.0716
-10 -4 8 -1.4076 0.0197
-10 -4 9 -6.9794 -0.0015
-10 -4 10 -2.9721 0.0139
-10 -4 11 -0.9752 0.0276
-10 -3 1 0.7756 -0.3711
-10 -3 2 -3.3043 0.0987
-10 -3 3 -3.1299 0.2418
-10 -3 4 -0.4526 0.0407
-10 -3 5 0.2488 0.0086
-10 -3 6 -0.0128 0.0743
-10 -3 7 -0.2545 -0.0001
-10 -3 8 -0.2126 -0.0565
-10 -3 9 4.0251 -0.0135
-10 -3 10 10.2939 0.0059
-10 -3 11 6.2327 -0.0248
-10 -2 1 -2.5112 0.1490
-10 -2 2 -5.1450 0.3944
-10 -2 3 -3.2471 0.1116
-10 -2 4 -2.1151 -0.0717
-10 -2 5 -1.0932 0.0134
-10 -2 6 2.2080 -0.0044
-10 -2 7 2.4741 -0.0907
-10 -2 8 -2.2355 -0.0461
-10 -2 9 -0.4749 -0.0054
-10 -2 10 9.1320 -0.0421
-10 -2 11 8.0148 -0.0418
-10 -2 12 -3.4824 -0.0151
-10 -1 1 -0.4096 0.4867
-10 -1 2 0.9530 0.1398
-10 -1 3 3.8952 -0.2150
-10 -1 4 4.0844 -0.1237
-10 -1 5 2.7162 -0.0032
-10 -1 6 0.0437 -0.0688
-10 -1 7 -2.1440 -0.0595
-10 -1 8 -0.0930 0.0199
-10 -1 9 4.3173 0.0048
-10 -1 10 -0.1721 -0.0047
-10 -1 11 -13.8878 0.0484
-10 -1 12 -13.8055 0.0465
-10 0 1 -4.4359 0.1502
-10 0 2 -3.4287 -0.3146
-10 0 3 -2.4447 -0.2354
-10 0 4 0.4080 0.0200
-10 0 5 0.6688 -0.0046
-10 0 6 -2.0252 -0.0577
-10 0 7 -0.9421 0.0312
-10 0 8 2.4832 0.0538
-10 0 9 5.5586 0.0053
-10 0 10 8.7143 0.0353
-10 0 11 8.5218 0.0695
-10 0 12 3.2161 0.0322
-10 1 1 1.1743 -0.3927
-10 1 2 2.0119 -0.3405
-10 1 3 2.6091 0.0671
-10 1 4 1.2970 0.1310
-10 1 5 -2.3754 -0.0036
-10 1 6 1.3324 0.0417
-10 1 7 9.1602 0.0972
-10 1 8 8.2908 0.0258
-10 1 9 4.2599 -0.0019
-10 1 10 0.5391 0.0315
-10 1 11 -10.8494 0.0025
-10 1 12 -19.9727 -0.0435
-10 2 1 3.3845 -0.3886
-10 2 2 -0.2597 0.1057
-10 2 3 -0.0666 0.2666
-10 2 4 1.0397 0.0355
-10 2 5 -0.0840 -0.0076
-10 2 6 1.9556 0.0929
-10 2 7 2.2889 0.0304
-10 2 8 -3.0641 -0.0449
-10 2 9 -6.3779 -0.0030
-10 2 10 -7.4402 0.0083
-10 2 11 -5.5213 -0.0364
-10 2 12 7.2860 -0.0393
-10 3 1 -3.8217 0.1548
-10 3 2 -4.1464 0.4248
-10 3 3 0.4580 0.1187
-10 3 4 -0.7630 -0.0932
-10 3 5 -1.0984 0.0156
-10 3 6 6.3979 0.0131
-10 3 7 5.0228 -0.0996
-10 3 8 -4.5339 -0.0649
-10 3 9 0.7611 -0.0095
-10 3 10 13.9716 -0.0450
-10 3 11 6.0902 -0.0390
-10 3 12 -20.9326 0.0082
-10 4 1 -1.1672 0.4820
-10 4 2 0.3454 0.1167
-10 4 3 0.9444 -0.2353
-10 4 4 -1.7401 -0.1083
-10 4 5 3.3361 0.0319
-10 4 6 6.5244 -0.0705
-10 4 7 -4.0457 -0.0801
-10 4 8 -6.6114 0.0350
-10 4 9 3.9703 0.0336
-10 4 10 -4.7481 -0.0063
-10 4 11 -28.4500 0.0286
-10 4 12 -18.9361 0.0331
-10 5 1 -3.2335 0.1112
-10 5 2 1.2657 -0.3219
-10 5 3 1.1951 -0.2160
-10 5 4 0.8648 0.0469
-10 5 5 2.5699 0.0078
-10 5 6 -4.8328 -0.0658
-10 5 7 -11.4713 0.0455
-10 5 8 -0.2580 0.0903
-10 5 9 9.4798 0.0071
-10 5 10 0.7117 0.0143
-10 5 11 -2.0318 0.0729
-10 6 1 0.6202 -0.3960
-10 6 2 0.0591 -0.2938
-10 6 3 -2.3723 0.1014
-10 6 4 -0.6189 0.1457
-10 6 5 0.6380 -0.0066
-10 6 6 -2.0340 0.0226
-10 6 7 1.3609 0.0925
-10 6 8 6.6958 0.0120
-10 6 9 -0.8825 -0.0468
-10 6 10 -12.8763 0.0063
-10 6 11 -12.3431 -0.0173
-10 7 1 -0.1425 -0.3267
-10 7 2 0.2243 0.1404
-10 7 3 0.2878 0.2602
-10 7 4 0.5291 0.0333
-10 7 5 -1.7028 -0.0169
-10 7 6 -2.9659 0.0749
-10 7 7 0.5593 0.0324
-10 7 8 2.3383 -0.0475
-10 7 9 0.8642 -0.0028
-10 7 10 1.8435 0.0347
-10 7 11 5.7895 -0.0455
-10 8 1 1.8660 0.1883
-10 8 2 1.2022 0.3885
-10 8 3 0.3036 0.0590
-10 8 4 0.6740 -0.1244
-10 8 5 -0.7129 -0.0064
-10 8 6 -1.2714 0.0036
-10 8 7 0.5971 -0.1003
-10 8 8 2.2615 -0.0880
-10 8 9 3.8862 -0.0202
-10 8 10 2.9331 -0.0328
-10 9 1 1.3320 0.4376
-10 9 2 -0.6202 0.0768
-10 9 3 -1.1083 -0.2239
-10 9 4 -1.1603 -0.0714
-10 9 5 -0.8627 0.0374
-10 9 6 2.4520 -0.0745
-10 9 7 4.0593 -0.0767
-10 9 8 1.4651 0.0440
-10 9 9 -1.5934 0.0653
-10 10 1 -0.1824 0.0578
-10 10 2 -0.4242 -0.3269
-10 10 3 0.4698 -0.1958
-10 10 4 0.3292 0.0409
-10 10 5 -0.2489 -0.0138
-10 10 6 -0.9388 -0.0604
-10 10 7 -2.7232 0.0453
-10 10 8 -0.4417 0.0767
-10 10 9 4.3494 0.0123
-10 11 1 1.2092 -0.3636
-10 11 2 0.5159 -0.2656
-10 11 3 -0.6579 0.0841
-10 11 4 -0.5811 0.1100
-10 11 5 1.0875 0.0056
-10 11 6 1.4386 0.0584
-10 11 7 0.9144 0.0972
-10 11 8 2.9947 0.0218
-10 12 1 0.1487 -0.2122
-10 12 2 -1.9692 0.1756
-10 12 3 -1.7297 0.2142
-10 12 4 -0.7339 -0.0026
-10 12 5 -1.7451 -0.0087
-10 12 6 -3.3140 0.0648
-10 13 1 -1.1503 0.1750
-10 13 2 -1.2667 0.3377
-10 13 3 0.1683 0.0438
-10 13 4 0.6030 -0.0509
-10 14 1 -1.2517 0.4131
-9 -16 1 -1.0269 -0.1634
-9 -15 1 -0.1755 0.2180
-9 -15 2 -0.2318 0.2606
-9 -15 3 -2.6259 0.0393
-9 -14 1 -0.2500 0.3065
-9 -14 2 -2.8062 0.0047
-9 -14 3 -4.6255 -0.1395
-9 -14 4 -0.5666 -0.0531
-9 -14 5 3.2616 -0.0426
-9 -13 1 1.3557 -0.0623
-9 -13 2 1.3685 -0.2928
-9 -13 3 2.5167 -0.1226
-9 -13 4 5.2083 0.0084
-9 -13 5 2.8048 -0.0434
-9 -13 6 -4.9611 0.0066
-9 -12 1 -3.1105 -0.3689
-9 -12 2 -6.0681 -0.1377
-9 -12 3 -5.1808 0.1410
-9 -12 4 -0.7732 0.0944
-9 -12 5 -0.8349 0.0140
-9 -12 6 -2.7872 0.0790
-9 -12 7 1.6764 0.0834
-9 -11 1 -1.0429 -0.1677
-9 -11 2 -0.7083 0.2289
-9 -11 3 1.5130 0.2170
-9 -11 4 1.1669 0.0255
-9 -11 5 -1.9574 0.0208
-9 -11 6 -0.4451 0.0626
-9 -11 7 3.5122 0.0001
-9 -11 8 -0.4006 -0.0645
-9 -10 1 -1.2494 0.3066
-9 -10 2 -1.0500 0.3168
-9 -10 3 -0.8592 0.0134
-9 -10 4 0.0851 -0.0707
-9 -10 5 1.1751 -0.0086
-9 -10 6 0.6600 -0.0551
-9 -10 7 -2.4652 -0.0940
-9 -10 8 -3.2454 -0.0505
-9 -10 9 4.3086 -0.0521
-9 -9 1 -3.3179 0.3561
-9 -9 2 -2.0721 -0.0507
-9 -9 3 -0.7550 -0.2032
-9 -9 4 1.4590 -0.0631
-9 -9 5 1.5079 -0.0384
-9 -9 6 0.7757 -0.0790
-9 -9 7 1.8305 -0.0031
-9 -9 8 3.3173 0.0326
-9 -9 9 2.6151 -0.0306
-9 -9 10 -2.9431 -0.0098
-9 -8 1 3.0916 -0.1093
-9 -8 2 -0.0147 -0.3395
-9 -8 3 -0.8371 -0.1127
-9 -8 4 -0.3821 0.0318
-9 -8 5 -1.6804 -0.0362
-9 -8 6 -1.3170 -0.0142
-9 -8 7 0.2557 0.0690
-9 -8 8 1.0015 0.0304
-9 -8 9 1.3252 -0.0286
-9 -8 10 -1.3994 -0.0089
-9 -7 1 -3.3293 -0.4553
-9 -7 2 -2.8102 -0.1601
-9 -7 3 0.9334 0.1529
-9 -7 4 1.8691 0.0922
-9 -7 5 1.5343 0.0019
-9 -7 6 3.1910 0.0642
-9 -7 7 3.5295 0.0698
-9 -7 8 3.0578 -0.0219
-9 -7 9 1.6117 -0.0563
-9 -7 10 -4.2822 -0.0296
-9 -7 11 -6.9648 -0.0231
-9 -6 1 -1.7567 -0.1821
-9 -6 2 -0.4571 0.2685
-9 -6 3 0.1890 0.2280
-9 -6 4 -0.7662 0.0142
-9 -6 5 0.9213 0.0196
-9 -6 6 2.7330 0.0597
-9 -6 7 0.5533 -0.0150
-9 -6 8 -1.8414 -0.0635
-9 -6 9 -4.1406 -0.0300
-9 -6 10 -5.2526 -0.0175
-9 -6 11 3.5805 -0.0303
-9 -5 1 1.7523 0.3623
-9 -5 2 3.8775 0.3389
-9 -5 3 2.1536 -0.0157
-9 -5 4 -1.0048 -0.0926
-9 -5 5 -0.6506 -0.0153
-9 -5 6 -1.0312 -0.0552
-9 -5 7 -3.0526 -0.0838
-9 -5 8 -2.3932 -0.0288
-9 -5 9 -3.7910 -0.0060
-9 -5 10 -7.7323 -0.0230
-9 -5 11 -5.6362 0.0133
-9 -5 12 -2.8441 0.0818
-9 -4 1 -0.7313 0.3976
-9 -4 2 -0.9052 -0.0678
-9 -4 3 -3.7565 -0.2307
-9 -4 4 0.1015 -0.0496
-9 -4 5 6.6103 -0.0113
-9 -4 6 4.5855 -0.0639
-9 -4 7 -0.0620 -0.0092
-9 -4 8 0.6408 0.0339
-9 -4 9 1.4509 0.0107
-9 -4 10 5.0330 0.0083
-9 -4 11 14.6522 0.0360
-9 -4 12 14.1268 0.0578
-9 -3 1 1.8042 -0.1412
-9 -3 2 -0.1563 -0.4089
-9 -3 3 -1.4180 -0.1166
-9 -3 4 -0.2894 0.0803
-9 -3 5 -2.6978 -0.0109
-9 -3 6 -6.8400 -0.0082
-9 -3 7 -4.3397 0.0771
-9 -3 8 -0.3620 0.0562
-9 -3 9 -3.0476 0.0111
-9 -3 10 -4.4078 0.0126
-9 -3 11 -1.6435 0.0234
-9 -3 12 -3.2989 0.0207
-9 -3 13 -3.1003 -0.0244
-9 -2 1 3.4672 -0.5016
-9 -2 2 0.8224 -0.1581
-9 -2 3 -0.4358 0.2110
-9 -2 4 1.6449 0.1118
-9 -2 5 1.2184 -0.0166
-9 -2 6 -2.5222 0.0621
-9 -2 7 -3.0014 0.0640
-9 -2 8 -0.2770 -0.0218
-9 -2 9 0.1893 -0.0241
-9 -2 10 0.7809 -0.0020
-9 -2 11 3.9126 -0.0184
-9 -2 12 5.0618 -0.0306
-9 -2 13 1.8774 -0.0265
-9 -1 1 -1.8804 -0.1692
-9 -1 2 -3.7699 0.3157
-9 -1 3 -3.1887 0.2526
-9 -1 4 -1.0228 -0.0178
-9 -1 5 -1.3289 -0.0082
-9 -1 6 -0.5011 0.0443
-9 -1 7 5.5713 -0.0460
-9 -1 8 7.0468 -0.0653
-9 -1 9 -0.1700 -0.0073
-9 -1 10 -0.2291 -0.0256
-9 -1 11 7.7682 -0.0517
-9 -1 12 3.0111 -0.0120
-9 -1 13 -13.6080 0.0128
-9 0 1 2.5512 0.3828
-9 0 2 -0.9820 0.3408
-9 0 3 -0.3939 -0.0499
-9 0 4 0.0394 -0.1227
-9 0 5 -2.2578 -0.0013
-9 0 6 -2.7975 -0.0468
-9 0 7 -0.8985 -0.0946
-9 0 8 -2.9857 -0.0035
-9 0 9 -4.9549 0.0321
-9 0 10 1.2668 -0.0192
-9 0 11 4.9145 -0.0052
-9 0 12 -1.0714 0.0306
-9 0 13 -0.7506 -0.0081
-9 1 1 -1.4099 0.3834
-9 1 2 -1.0072 -0.1011
-9 1 3 -0.3956 -0.2635
-9 1 4 0.5888 -0.0559
-9 1 5 1.5790 -0.0035
-9 1 6 2.0726 -0.0779
-9 1 7 2.6951 -0.0116
-9 1 8 0.8752 0.0653
-9 1 9 -1.2894 0.0139
-9 1 10 1.6755 -0.0189
-9 1 11 5.0613 0.0280
-9 1 12 2.6906 0.0298
-9 1 13 -1.4184 -0.0058
-9 2 1 0.1823 -0.1635
-9 2 2 0.0574 -0.4148
-9 2 3 0.8601 -0.1071
-9 2 4 1.8520 0.1004
-9 2 5 0.2272 -0.0002
-9 2 6 -0.5932 -0.0115
-9 2 7 0.0349 0.0916
-9 2 8 -2.8872 0.0761
-9 2 9 -1.3694 0.0029
-9 2 10 9.8131 0.0055
-9 2 11 11.7092 0.0187
-9 2 12 -5.5167 -0.0134
-9 2 13 -19.4883 -0.0103
-9 3 1 1.7083 -0.4831
-9 3 2 -0.0416 -0.1442
-9 3 3 -1.5502 0.2195
-9 3 4 -0.7180 0.1159
-9 3 5 -0.2810 -0.0245
-9 3 6 -0.1962 0.0565
-9 3 7 0.0946 0.0737
-9 3 8 1.3482 -0.0173
-9 3 9 4.0323 -0.0241
-9 3 10 1.0562 0.0204
-9 3 11 -7.6213 0.0084
-9 3 12 -6.0029 -0.0164
-9 3 13 9.2243 -0.0039
-9 4 1 0.9844 -0.1591
-9 4 2 -0.4660 0.3246
-9 4 3 2.1021 0.2572
-9 4 4 4.8313 -0.0265
-9 4 5 0.9834 -0.0095
-9 4 6 -3.5054 0.0682
-9 4 7 -2.6570 -0.0248
-9 4 8 -0.3455 -0.0738
-9 4 9 1.1107 -0.0276
-9 4 10 5.8735 -0.0334
-9 4 11 10.9465 -0.0538
-9 4 12 3.1998 -0.0187
-9 4 13 -12.6749 -0.0008
-9 5 1 -0.4159 0.3907
-9 5 2 -2.3711 0.3311
-9 5 3 -0.2461 -0.0775
-9 5 4 -1.3255 -0.1503
-9 5 5 -4.2713 0.0026
-9 5 6 -0.3690 -0.0276
-9 5 7 4.7863 -0.0968
-9 5 8 1.4358 -0.0171
-9 5 9 -4.0971 0.0373
-9 5 10 -3.4208 0.0026
-9 5 11 -5.3747 0.0004
-9 5 12 -13.8596 0.0131
-9 5 13 -10.4258 -0.0067
-9 6 1 -2.7424 0.3548
-9 6 2 0.3300 -0.1321
-9 6 3 3.4961 -0.2799
-9 6 4 1.1511 -0.0469
-9 6 5 -1.1749 0.0289
-9 6 6 -0.9742 -0.0626
-9 6 7 -2.0166 -0.0256
-9 6 8 -1.9994 0.0643
-9 6 9 3.1974 0.0453
-9 6 10 6.9831 0.0245
-9 6 11 -0.1680 0.0713
-9 6 12 -7.4530 0.0861
-9 7 1 -0.4044 -0.1706
-9 7 2 1.6076 -0.3826
-9 7 3 -0.2116 -0.0806
-9 7 4 -2.8093 0.1120
-9 7 5 -2.7466 0.0173
-9 7 6 -1.0455 -0.0051
-9 7 7 0.9542 0.0855
-9 7 8 0.2824 0.0697
-9 7 9 -2.5524 -0.0219
-9 7 10 -1.3919 -0.0349
-9 7 11 3.2836 -0.0115
-9 7 12 8.2605 -0.0511
-9 8 1 -0.0323 -0.4560
-9 8 2 0.3125 -0.1109
-9 8 3 -0.1860 0.2261
-9 8 4 -0.1222 0.1226
-9 8 5 0.4821 -0.0091
-9 8 6 2.3805 0.0512
-9 8 7 2.8989 0.0656
-9 8 8 -2.2874 -0.0126
-9 8 9 -5.0472 -0.0148
-9 8 10 -0.7710 0.0419
-9 8 11 -2.7726 0.0141
-9 8 12 -10.7663 -0.0711
-9 9 1 1.3295 -0.1002
-9 9 2 0.4983 0.3371
-9 9 3 0.1813 0.2192
-9 9 4 0.6751 -0.0562
-9 9 5 0.3517 -0.0183
-9 9 6 -0.1254 0.0605
-9 9 7 -2.0482 -0.0304
-9 9 8 -3.8574 -0.0860
-9 9 9 2.3542 -0.0352
-9 9 10 10.2597 -0.0203
-9 9 11 7.5914 -0.0364
-9 10 1 2.1077 0.3991
-9 10 2 2.0382 0.3009
-9 10 3 2.4978 -0.1123
-9 10 4 2.0034 -0.1577
-9 10 5 0.1072 -0.0013
-9 10 6 -0.4471 -0.0379
-9 10 7 -1.2412 -0.0983
-9 10 8 -2.3317 -0.0124
-9 10 9 0.6706 0.0421
-9 10 10 2.4307 -0.0090
-9 11 1 -0.0798 0.3111
-9 11 2 -1.3378 -0.1443
-9 11 3 -0.0300 -0.2687
-9 11 4 -0.8114 -0.0376
-9 11 5 -2.9058 0.0252
-9 11 6 -1.8822 -0.0561
-9 11 7 -0.7685 -0.0197
-9 11 8 -0.7069 0.0451
-9 11 9 1.7573 0.0191
-9 12 1 0.3095 -0.2046
-9 12 2 2.8026 -0.3772
-9 12 3 2.7050 -0.0830
-9 12 4 -1.0921 0.0881
-9 12 5 -1.8309 0.0155
-9 12 6 0.9176 0.0181
-9 12 7 0.1740 0.0827
-9 12 8 -1.5196 0.0598
-9 13 1 0.6210 -0.3403
-9 13 2 0.2648 -0.0400
-9 13 3 -1.8766 0.1907
-9 13 4 -2.7287 0.0642
-9 13 5 -0.5466 -0.0001
-9 13 6 1.0163 0.0714
-9 13 7 -0.4111 0.0498
-9 14 1 0.1449 -0.0665
-9 14 2 -0.4764 0.3141
-9 14 3 -1.4491 0.1736
-9 14 4 -1.5561 -0.0484
-9 14 5 -0.2529 0.0164
-9 15 1 -0.6898 0.3877
-8 -17 1 0.2011 0.1158
-8 -16 1 2.7889 -0.2016
-8 -16 2 1.3914 -0.1969
-8 -16 3 -0.3187 -0.0033
-8 -15 1 0.7671 -0.2942
-8 -15 2 -2.1007 0.0251
-8 -15 3 -1.8365 0.1356
-8 -15 4 -2.2738 0.0352
-8 -14 1 1.6703 0.0383
-8 -14 2 2.3095 0.2689
-8 -14 3 1.8647 0.0997
-8 -14 4 -0.4796 -0.0172
-8 -14 5 1.7433 0.0265
-8 -14 6 4.8283 -0.0335
-8 -13 1 -2.1437 0.3682
-8 -13 2 -2.6814 0.1683
-8 -13 3 -3.8351 -0.1068
-8 -13 4 -2.2280 -0.0745
-8 -13 5 3.1177 -0.0042
-8 -13 6 3.7216 -0.0582
-8 -13 7 -0.5435 -0.0622
-8 -12 1 1.8715 0.1981
-8 -12 2 2.5656 -0.1922
-8 -12 3 1.1368 -0.2011
-8 -12 4 -0.5999 -0.0172
-8 -12 5 -0.4862 -0.0021
-8 -12 6 -1.9125 -0.0326
-8 -12 7 -3.5043 0.0247
-8 -12 8 -2.7347 0.0688
-8 -11 1 2.2494 -0.2945
-8 -11 2 0.9820 -0.3327
-8 -11 3 -2.2376 -0.0192
-8 -11 4 -1.1203 0.1027
-8 -11 5 2.5250 0.0396
-8 -11 6 1.0569 0.0421
-8 -11 7 -1.4135 0.0634
-8 -11 8 0.3672 0.0440
-8 -11 9 2.2630 0.0440
-8 -10 1 -2.3388 -0.3824
-8 -10 2 -4.1887 0.0297
-8 -10 3 -4.2129 0.2343
-8 -10 4 -1.5595 0.0942
-8 -10 5 -0.3108 0.0158
-8 -10 6 -0.6259 0.0510
-8 -10 7 1.6704 0.0259
-8 -10 8 1.1801 -0.0050
-8 -10 9 -4.9859 0.0093
-8 -10 10 -6.6501 -0.0109
-8 -9 1 3.1374 0.0797
-8 -9 2 0.8463 0.3752
-8 -9 3 -0.7780 0.1623
-8 -9 4 -0.8530 -0.0420
-8 -9 5 -0.4878 -0.0044
-8 -9 6 -0.4840 -0.0055
-8 -9 7 -1.4077 -0.0758
-8 -9 8 -3.6684 -0.0445
-8 -9 9 -1.2821 0.0060
-8 -9 10 6.3239 -0.0329
-8 -9 11 7.2258 -0.0639
-8 -8 1 -5.3557 0.4629
-8 -8 2 -2.7308 0.1890
-8 -8 3 0.0753 -0.1622
-8 -8 4 2.6541 -0.1210
-8 -8 5 3.8867 -0.0072
-8 -8 6 2.8835 -0.0548
-8 -8 7 0.4789 -0.0599
-8 -8 8 -1.5210 0.0185
-8 -8 9 0.4064 0.0201
-8 -8 10 3.2990 -0.0161
-8 -8 11 1.4434 -0.0035
-8 -7 1 0.8171 0.1904
-8 -7 2 1.4243 -0.2810
-8 -7 3 -1.0059 -0.2626
-8 -7 4 -2.1937 -0.0218
-8 -7 5 -3.0828 0.0027
-8 -7 6 -3.4222 -0.0441
-8 -7 7 -2.1508 0.0245
-8 -7 8 0.2736 0.0781
-8 -7 9 3.8167 0.0482
-8 -7 10 3.5472 0.0269
-8 -7 11 -2.0310 0.0136
-8 -7 12 -3.7697 -0.0184
-8 -6 1 2.8782 -0.3579
-8 -6 2 0.1620 -0.3672
-8 -6 3 -0.3783 0.0095
-8 -6 4 0.7902 0.1263
-8 -6 5 0.9219 0.0247
-8 -6 6 1.4964 0.0233
-8 -6 7 0.8817 0.0725
-8 -6 8 -0.7384 0.0419
-8 -6 9 -0.2652 0.0001
-8 -6 10 -1.8602 -0.0022
-8 -6 11 -5.4893 -0.0295
-8 -6 12 -4.3132 -0.0771
-8 -5 1 -3.5345 -0.4311
-8 -5 2 -1.5040 0.0524
-8 -5 3 1.4994 0.2541
-8 -5 4 1.9696 0.0799
-8 -5 5 1.8968 0.0128
-8 -5 6 3.0065 0.0688
-8 -5 7 2.0549 0.0330
-8 -5 8 1.5216 -0.0356
-8 -5 9 3.1415 -0.0320
-8 -5 10 2.1092 -0.0291
-8 -5 11 2.0015 -0.0745
-8 -5 12 6.0297 -0.0733
-8 -5 13 5.9711 -0.0113
-8 -4 1 -0.1605 0.1034
-8 -4 2 0.9159 0.4046
-8 -4 3 1.1768 0.1451
-8 -4 4 -1.8309 -0.0494
-8 -4 5 -3.3535 0.0159
-8 -4 6 -2.8095 0.0058
-8 -4 7 -3.3594 -0.0763
-8 -4 8 -2.0506 -0.0554
-8 -4 9 -0.4514 -0.0016
-8 -4 10 -3.9608 -0.0149
-8 -4 11 -6.8441 -0.0239
-8 -4 12 -4.1557 0.0206
-8 -4 13 0.4931 0.0285
-8 -3 1 2.5428 0.5148
-8 -3 2 5.6876 0.1986
-8 -3 3 2.5523 -0.1777
-8 -3 4 -1.1782 -0.1107
-8 -3 5 1.4236 -0.0014
-8 -3 6 3.4596 -0.0706
-8 -3 7 0.3664 -0.0761
-8 -3 8 -1.3540 0.0028
-8 -3 9 -2.0114 0.0236
-8 -3 10 -3.0857 0.0107
-8 -3 11 2.0784 0.0278
-8 -3 12 8.8801 0.0390
-8 -3 13 5.6460 0.0221
-8 -3 14 -4.3448 0.0451
-8 -2 1 -2.0621 0.2019
-8 -2 2 -0.1251 -0.3136
-8 -2 3 -1.5242 -0.2823
-8 -2 4 -0.7738 -0.0029
-8 -2 5 1.9722 0.0069
-8 -2 6 1.6685 -0.0532
-8 -2 7 0.6139 0.0216
-8 -2 8 1.7362 0.0681
-8 -2 9 1.3828 0.0395
-8 -2 10 1.1810 0.0300
-8 -2 11 2.7788 0.0348
-8 -2 12 -0.8399 0.0089
-8 -2 13 -6.5999 -0.0284
-8 -2 14 -4.5150 -0.0263
-8 -1 1 5.0482 -0.3896
-8 -1 2 1.4875 -0.3902
-8 -1 3 -3.1014 0.0294
-8 -1 4 -3.6806 0.1514
-8 -1 5 -1.5140 0.0139
-8 -1 6 -2.5131 0.0171
-8 -1 7 -6.4482 0.0737
-8 -1 8 -6.6076 0.0261
-8 -1 9 -2.0232 -0.0071
-8 -1 10 1.1907 0.0144
-8 -1 11 0.5696 0.0022
-8 -1 12 3.0116 -0.0423
-8 -1 13 11.3544 -0.0480
-8 -1 14 12.2396 -0.0045
-8 0 1 -1.9258 -0.4141
-8 0 2 0.0550 0.0780
-8 0 3 0.4123 0.2822
-8 0 4 2.1554 0.0721
-8 0 5 4.1101 -0.0164
-8 0 6 1.3836 0.0637
-8 0 7 -0.7043 0.0270
-8 0 8 3.4960 -0.0548
-8 0 9 4.5499 -0.0321
-8 0 10 -1.9178 -0.0074
-8 0 11 -3.8280 -0.0458
-8 0 12 0.6952 -0.0542
-8 0 13 -4.2441 -0.0029
-8 0 14 -18.5853 0.0261
-8 1 1 0.6575 0.1434
-8 1 2 0.0472 0.4014
-8 1 3 -0.8719 0.1109
-8 1 4 0.2199 -0.0985
-8 1 5 -0.3542 -0.0107
-8 1 6 -3.1509 0.0054
-8 1 7 -1.7062 -0.0882
-8 1 8 1.6017 -0.0616
-8 1 9 -0.7356 0.0274
-8 1 10 -1.9192 0.0200
-8 1 11 4.6164 -0.0132
-8 1 12 7.6740 0.0197
-8 1 13 0.3976 0.0377
-8 2 1 0.7933 0.4914
-8 2 2 0.9377 0.1480
-8 2 3 -0.8399 -0.2027
-8 2 4 -1.4834 -0.1116
-8 2 5 -0.9561 0.0097
-8 2 6 -0.6896 -0.0639
-8 2 7 1.2850 -0.0836
-8 2 8 3.3050 0.0018
-8 2 9 1.3735 0.0269
-8 2 10 -1.5999 -0.0029
-8 2 11 -1.7243 0.0180
-8 2 12 -1.4556 0.0497
-8 2 13 -2.7018 0.0073
-8 2 14 -0.4692 -0.0357
-8 3 1 5.0685 0.1490
-8 3 2 3.0514 -0.3338
-8 3 3 0.3490 -0.2647
-8 3 4 0.7068 0.0079
-8 3 5 1.3801 0.0141
-8 3 6 1.5427 -0.0367
-8 3 7 2.3043 0.0401
-8 3 8 -1.3144 0.0838
-8 3 9 -7.6542 0.0369
-8 3 10 -4.5623 0.0038
-8 3 11 6.1881 0.0102
-8 3 12 6.9997 -0.0063
-8 3 13 -3.1894 -0.0392
-8 3 14 -4.2334 -0.0082
-8 4 1 -0.2583 -0.3964
-8 4 2 -3.1536 -0.3570
-8 4 3 -3.2475 0.0521
-8 4 4 -0.5676 0.1453
-8 4 5 2.3884 0.0116
-8 4 6 3.8725 0.0259
-8 4 7 1.2869 0.0786
-8 4 8 -3.0607 0.0286
-8 4 9 -1.0110 -0.0029
-8 4 10 4.7594 0.0289
-8 4 11 3.0129 0.0357
-8 4 12 -3.8181 -0.0055
-8 4 13 -3.6235 -0.0243
-8 5 1 0.9798 -0.3796
-8 5 2 0.2565 0.1050
-8 5 3 0.1842 0.2822
-8 5 4 1.9585 0.0673
-8 5 5 3.4313 -0.0088
-8 5 6 -0.2490 0.0639
-8 5 7 -6.1911 0.0066
-8 5 8 -3.9880 -0.0764
-8 5 9 3.7020 -0.0455
-8 5 10 3.6739 -0.0157
-8 5 11 -1.8958 -0.0382
-8 5 12 -3.4264 -0.0320
-8 5 13 -1.9207 0.0076
-8 5 14 2.3641 0.0083
-8 6 1 -0.2878 0.1586
-8 6 2 -1.5514 0.3970
-8 6 3 -0.3139 0.1061
-8 6 4 2.5598 -0.1008
-8 6 5 2.0235 -0.0135
-8 6 6 -2.5748 0.0036
-8 6 7 -2.9019 -0.0805
-8 6 8 2.1340 -0.0484
-8 6 9 0.8393 0.0186
-8 6 10 -4.0385 -0.0048
-8 6 11 1.9530 -0.0257
-8 6 12 10.2265 -0.0015
-8 6 13 6.6652 0.0020
-8 6 14 -0.1440 0.0043
-8 7 1 -2.3639 0.4448
-8 7 2 -1.1803 0.1109
-8 7 3 1.0266 -0.2115
-8 7 4 1.4458 -0.1176
-8 7 5 -0.4903 -0.0006
-8 7 6 -2.3833 -0.0664
-8 7 7 -0.3967 -0.0741
-8 7 8 2.3378 0.0165
-8 7 9 -0.0513 0.0440
-8 7 10 -2.9386 0.0312
-8 7 11 -5.3086 0.0537
-8 7 12 -13.9247 0.0617
-8 7 13 -16.8973 0.0414
-8 8 1 -0.4633 0.1326
-8 8 2 0.7058 -0.2921
-8 8 3 -0.2088 -0.2201
-8 8 4 -1.0994 0.0113
-8 8 5 -1.4254 0.0085
-8 8 6 -2.3037 -0.0275
-8 8 7 -0.6268 0.0491
-8 8 8 1.8361 0.0844
-8 8 9 0.1632 0.0375
-8 8 10 0.1192 0.0120
-8 8 11 5.5029 0.0164
-8 8 12 10.8106 0.0053
-8 8 13 14.6007 -0.0144
-8 9 1 -1.1564 -0.3669
-8 9 2 0.2825 -0.2938
-8 9 3 -0.4596 0.0779
-8 9 4 0.3764 0.1287
-8 9 5 1.2621 0.0025
-8 9 6 0.9804 0.0301
-8 9 7 2.5919 0.0838
-8 9 8 1.7700 0.0267
-8 9 9 -3.4013 -0.0239
-8 9 10 -3.5510 -0.0070
-8 9 11 -0.1315 -0.0075
-8 9 12 -2.3679 -0.0481
-8 10 1 -0.5454 -0.3351
-8 10 2 -2.5225 0.1216
-8 10 3 -2.9549 0.2563
-8 10 4 0.4843 0.0456
-8 10 5 2.3083 0.0034
-8 10 6 1.4937 0.0865
-8 10 7 1.3905 0.0219
-8 10 8 -0.2985 -0.0710
-8 10 9 -2.4582 -0.0315
-8 10 10 -1.2500 0.0151
-8 10 11 -2.1454 -0.0252
-8 10 12 -5.4591 -0.0341
-8 11 1 1.4572 0.1829
-8 11 2 2.5039 0.3951
-8 11 3 3.1774 0.0848
-8 11 4 4.3670 -0.1203
-8 11 5 2.5771 -0.0268
-8 11 6 -1.1373 -0.0077
-8 11 7 -2.4965 -0.0876
-8 11 8 -2.1546 -0.0473
-8 11 9 -1.0182 0.0351
-8 11 10 1.1292 0.0012
-8 11 11 2.8839 -0.0359
-8 12 1 0.4802 0.4165
-8 12 2 -2.0843 0.1090
-8 12 3 -0.7484 -0.2009
-8 12 4 2.7843 -0.1005
-8 12 5 1.2607 0.0139
-8 12 6 -1.9800 -0.0566
-8 12 7 -0.3562 -0.0727
-8 12 8 1.5284 0.0088
-8 12 9 -0.8759 0.0261
-8 12 10 -3.1497 -0.0129
-8 13 1 0.6530 0.0802
-8 13 2 1.5656 -0.2841
-8 13 3 3.6433 -0.1984
-8 13 4 1.7078 0.0018
-8 13 5 -3.7303 -0.0193
-8 13 6 -4.4667 -0.0320
-8 13 7 -0.2155 0.0546
-8 13 8 0.4464 0.0782
-8 13 9 -1.9530 0.0210
-8 14 1 1.5628 -0.3039
-8 14 2 0.9735 -0.2346
-8 14 3 0.3460 0.0829
-8 14 4 -0.6046 0.1057
-8 14 5 -1.2868 0.0218
-8 14 6 0.4333 0.0679
-8 14 7 2.1991 0.0632
-8 15 1 0.8053 -0.2546
-8 15 2 0.0556 0.1420
-8 15 3 -0.1449 0.2180
-8 15 4 -0.9415 0.0028
-8 15 5 -1.6172 0.0100
-7 -17 1 -0.6433 0.2015
-7 -17 2 1.7518 0.1887
-7 -16 1 -2.6336 0.2566
-7 -16 2 -1.0791 -0.0296
-7 -16 3 0.1630 -0.1183
-7 -16 4 -3.2364 -0.0518
-7 -15 1 1.6013 -0.0718
-7 -15 2 5.0053 -0.2744
-7 -15 3 2.7167 -0.0976
-7 -15 4 -1.2472 0.0277
-7 -15 5 -0.0801 -0.0144
-7 -14 1 0.5595 -0.3615
-7 -14 2 0.3013 -0.1555
-7 -14 3 -1.1347 0.1042
-7 -14 4 -1.9512 0.0653
-7 -14 5 -1.9011 -0.0040
-7 -14 6 -0.8739 0.0559
-7 -14 7 0.0746 0.0898
-7 -13 1 3.2603 -0.1942
-7 -13 2 3.0753 0.1850
-7 -13 3 0.7469 0.2003
-7 -13 4 -3.2829 0.0408
-7 -13 5 -3.1010 0.0195
-7 -13 6 2.4102 0.0287
-7 -13 7 5.0392 -0.0212
-7 -13 8 3.0844 -0.0462
-7 -12 1 2.9098 0.2369
-7 -12 2 1.7475 0.2746
-7 -12 3 -0.9892 0.0077
-7 -12 4 -0.8244 -0.0856
-7 -12 5 4.1109 -0.0349
-7 -12 6 6.3628 -0.0407
-7 -12 7 1.9116 -0.0401
-7 -12 8 -1.3210 -0.0010
-7 -12 9 -1.6966 0.0022
-7 -11 1 -0.3114 0.3558
-7 -11 2 -1.8635 -0.0087
-7 -11 3 -2.0397 -0.1846
-7 -11 4 -1.2130 -0.0799
-7 -11 5 -0.4392 -0.0381
-7 -11 6 -1.2565 -0.0551
-7 -11 7 -2.0725 -0.0036
-7 -11 8 -1.3377 0.0236
-7 -11 9 -2.5197 -0.0051
-7 -11 10 -3.1910 0.0019
-7 -10 1 4.3111 -0.0582
-7 -10 2 2.8770 -0.3264
-7 -10 3 0.9515 -0.1397
-7 -10 4 -0.6854 0.0350
-7 -10 5 -0.1573 0.0172
-7 -10 6 0.0093 0.0305
-7 -10 7 -0.7869 0.0696
-7 -10 8 0.0345 0.0321
-7 -10 9 1.3616 0.0012
-7 -10 10 2.0541 0.0216
-7 -10 11 0.8536 0.0383
-7 -9 1 -1.3650 -0.4427
-7 -9 2 -1.6861 -0.2031
-7 -9 3 -1.8334 0.1268
-7 -9 4 -0.4897 0.1134
-7 -9 5 1.5927 0.0274
-7 -9 6 1.7585 0.0593
-7 -9 7 2.1401 0.0530
-7 -9 8 2.4016 -0.0055
-7 -9 9 -1.4340 -0.0092
-7 -9 10 -4.8049 0.0154
-7 -9 11 -2.5797 0.0208
-7 -9 12 1.8435 0.0046
-7 -8 1 0.9591 -0.2178
-7 -8 2 -2.0994 0.2410
-7 -8 3 -3.2715 0.2505
-7 -8 4 -2.2157 0.0315
-7 -8 5 -1.3500 -0.0051
-7 -8 6 -1.6891 0.0211
-7 -8 7 -0.8131 -0.0380
-7 -8 8 -0.6395 -0.0594
-7 -8 9 -2.1774 -0.0143
-7 -8 10 -1.3140 0.0016
-7 -8 11 -0.3623 0.0002
-7 -8 12 -2.1358 0.0212
-7 -7 1 0.4092 0.3303
-7 -7 2 -1.4973 0.3648
-7 -7 3 0.3915 0.0182
-7 -7 4 2.6140 -0.1069
-7 -7 5 2.7347 -0.0276
-7 -7 6 2.0879 -0.0342
-7 -7 7 1.7786 -0.0718
-7 -7 8 -1.0163 -0.0330
-7 -7 9 -3.7053 -0.0054
-7 -7 10 -1.3288 -0.0072
-7 -7 11 2.6152 0.0257
-7 -7 12 4.9961 0.0454
-7 -7 13 4.9170 0.0108
-7 -6 1 -6.4751 0.4244
-7 -6 2 -2.0074 -0.0353
-7 -6 3 2.0250 -0.2644
-7 -6 4 2.3402 -0.1203
-7 -6 5 -0.2485 -0.0277
-7 -6 6 -1.7175 -0.0543
-7 -6 7 -0.2733 -0.0259
-7 -6 8 1.0159 0.0243
-7 -6 9 2.0569 0.0217
-7 -6 10 2.3451 0.0305
-7 -6 11 -0.6981 0.0579
-7 -6 12 -2.9665 0.0387
-7 -6 13 -2.0244 0.0001
-7 -5 1 0.5845 -0.0982
-7 -5 2 -0.6711 -0.4116
-7 -5 3 -1.8514 -0.1688
-7 -5 4 -2.2580 0.0631
-7 -5 5 -1.9366 0.0331
-7 -5 6 0.6817 0.0079
-7 -5 7 2.6216 0.0608
-7 -5 8 -0.1308 0.0635
-7 -5 9 -2.8586 0.0312
-7 -5 10 -2.8112 0.0396
-7 -5 11 -1.9641 0.0387
-7 -5 12 0.7966 -0.0082
-7 -5 13 2.4947 -0.0413
-7 -5 14 0.5524 -0.0602
-7 -4 1 0.2743 -0.5039
-7 -4 2 1.6421 -0.2101
-7 -4 3 3.6678 0.1695
-7 -4 4 2.8704 0.1312
-7 -4 5 0.5940 0.0179
-7 -4 6 0.9195 0.0615
-7 -4 7 0.7093 0.0741
-7 -4 8 -2.0175 0.0003
-7 -4 9 -3.0470 -0.0264
-7 -4 10 -2.5431 0.0001
-7 -4 11 -0.5336 -0.0224
-7 -4 12 3.4274 -0.0592
-7 -4 13 2.5163 -0.0367
-7 -4 14 -2.2531 -0.0335
-7 -3 1 -8.3293 -0.2116
-7 -3 2 -4.3008 0.3041
-7 -3 3 0.7195 0.2797
-7 -3 4 2.6054 0.0185
-7 -3 5 2.7225 0.0007
-7 -3 6 3.5028 0.0449
-7 -3 7 1.9626 -0.0274
-7 -3 8 -0.5081 -0.0741
-7 -3 9 0.7441 -0.0382
-7 -3 10 3.1387 -0.0241
-7 -3 11 3.1078 -0.0445
-7 -3 12 0.0844 -0.0048
-7 -3 13 -3.0921 0.0474
-7 -3 14 0.2954 0.0035
-7 -2 1 3.9047 0.3837
-7 -2 2 4.7564 0.3964
-7 -2 3 2.7327 -0.0047
-7 -2 4 -2.9344 -0.1160
-7 -2 5 -5.1860 -0.0013
-7 -2 6 -3.2424 -0.0219
-7 -2 7 -3.3187 -0.0851
-7 -2 8 -3.4166 -0.0521
-7 -2 9 -1.1426 -0.0083
-7 -2 10 -1.3204 -0.0051
-7 -2 11 -2.2502 0.0136
-7 -2 12 1.4327 0.0595
-7 -2 13 6.4935 0.0529
-7 -2 14 6.0749 0.0035
-7 -2 15 -0.2463 0.0209
-7 -1 1 -2.8591 0.4454
-7 -1 2 1.9936 -0.0519
-7 -1 3 3.3554 -0.2815
-7 -1 4 2.5170 -0.0946
-7 -1 5 2.6544 -0.0002
-7 -1 6 1.9643 -0.0552
-7 -1 7 0.5225 -0.0261
-7 -1 8 1.0420 0.0382
-7 -1 9 0.0125 0.0410
-7 -1 10 -2.7629 0.0343
-7 -1 11 -0.7411 0.0512
-7 -1 12 1.6868 0.0519
-7 -1 13 -3.2944 0.0015
-7 -1 14 -8.7835 -0.0513
-7 -1 15 -6.3103 -0.0412
-7 0 1 0.0677 -0.1099
-7 0 2 0.2232 -0.4126
-7 0 3 -1.5517 -0.1510
-7 0 4 -2.8979 0.0846
-7 0 5 -2.3388 0.0217
-7 0 6 0.5377 -0.0206
-7 0 7 3.0996 0.0411
-7 0 8 2.1496 0.0453
-7 0 9 -0.1008 0.0122
-7 0 10 1.4263 0.0164
-7 0 11 3.5894 0.0236
-7 0 12 1.6244 0.0021
-7 0 13 2.3309 -0.0294
-7 0 14 8.0409 -0.0318
-7 0 15 8.0526 0.0029
-7 1 1 1.3234 -0.4969
-7 1 2 -0.1822 -0.1806
-7 1 3 -1.2674 0.1947
-7 1 4 -2.7799 0.1334
-7 1 5 -1.4123 -0.0040
-7 1 6 0.6575 0.0461
-7 1 7 -1.9899 0.0703
-7 1 8 -5.0639 -0.0081
-7 1 9 -2.5069 -0.0419
-7 1 10 0.7362 -0.0213
-7 1 11 -0.3524 -0.0283
-7 1 12 -0.0627 -0.0477
-7 1 13 2.5093 -0.0355
-7 1 14 -2.2709 -0.0014
-7 1 15 -10.5638 0.0222
-7 2 1 -3.0274 -0.1641
-7 2 2 -0.4899 0.3234
-7 2 3 1.0254 0.2547
-7 2 4 1.2550 -0.0237
-7 2 5 1.9289 -0.0289
-7 2 6 1.6166 0.0402
-7 2 7 0.7115 -0.0219
-7 2 8 1.3002 -0.0627
-7 2 9 0.4691 -0.0142
-7 2 10 -2.7615 0.0027
-7 2 11 -1.9989 -0.0276
-7 2 12 3.0863 -0.0139
-7 2 13 1.9176 0.0272
-7 2 14 -5.9354 0.0225
-7 3 1 -3.9762 0.4032
-7 3 2 -0.0876 0.3595
-7 3 3 1.3970 -0.0468
-7 3 4 1.0862 -0.1267
-7 3 5 1.9638 -0.0011
-7 3 6 2.2036 -0.0266
-7 3 7 0.4926 -0.0857
-7 3 8 0.1703 -0.0392
-7 3 9 2.8689 0.0050
-7 3 10 5.2583 -0.0088
-7 3 11 4.1761 0.0009
-7 3 12 -0.1344 0.0502
-7 3 13 -5.8141 0.0507
-7 3 14 -7.7062 0.0021
-7 4 1 3.7757 0.4173
-7 4 2 4.9727 -0.0964
-7 4 3 0.2661 -0.2853
-7 4 4 -3.9580 -0.0802
-7 4 5 -4.2919 -0.0051
-7 4 6 -3.2685 -0.0623
-7 4 7 -1.6263 -0.0206
-7 4 8 0.1968 0.0382
-7 4 9 -1.2601 0.0184
-7 4 10 -5.0022 -0.0040
-7 4 11 -4.0459 0.0204
-7 4 12 0.8739 0.0357
-7 4 13 1.2764 -0.0004
-7 4 14 0.7994 -0.0251
-7 5 1 3.5177 -0.1574
-7 5 2 0.3733 -0.4166
-7 5 3 -1.0319 -0.1161
-7 5 4 1.4398 0.0964
-7 5 5 3.9775 0.0094
-7 5 6 4.9234 -0.0038
-7 5 7 4.5035 0.0864
-7 5 8 1.5719 0.0747
-7 5 9 -1.6238 0.0128
-7 5 10 -0.2974 0.0144
-7 5 11 4.0291 0.0379
-7 5 12 3.6301 0.0130
-7 5 13 -2.1504 -0.0290
-7 5 14 -3.6816 -0.0195
-7 5 15 -0.6875 0.0059
-7 6 1 -0.4155 -0.4790
-7 6 2 -1.7312 -0.1410
-7 6 3 -1.3630 0.2088
-7 6 4 -1.5450 0.1131
-7 6 5 -1.1087 -0.0119
-7 6 6 0.7634 0.0669
-7 6 7 -0.6211 0.0716
-7 6 8 -3.6277 -0.0370
-7 6 9 -1.1875 -0.0524
-7 6 10 2.7506 0.0000
-7 6 11 -0.2172 -0.0151
-7 6 12 -7.4080 -0.0620
-7 6 13 -9.4521 -0.0456
-7 6 14 -2.2835 -0.0057
-7 6 15 6.2957 -0.0172
-7 7 1 1.2277 -0.1301
-7 7 2 0.0744 0.3277
-7 7 3 -0.0018 0.2403
-7 7 4 -0.1576 -0.0302
-7 7 5 1.0544 -0.0142
-7 7 6 0.5925 0.0514
-7 7 7 -2.8417 -0.0435
-7 7 8 -1.9015 -0.0920
-7 7 9 2.4915 -0.0273
-7 7 10 1.7532 -0.0099
-7 7 11 0.7906 -0.0366
-7 7 12 5.6974 -0.0040
-7 7 13 8.4430 0.0369
-7 7 14 5.3050 0.0087
-7 8 1 -2.5158 0.3576
-7 8 2 -0.9738 0.3006
-7 8 3 0.6622 -0.0636
-7 8 4 0.5580 -0.1178
-7 8 5 0.8287 0.0005
-7 8 6 0.4854 -0.0395
-7 8 7 0.1822 -0.0950
-7 8 8 1.7980 -0.0259
-7 8 9 0.9016 0.0203
-7 8 10 -2.4255 -0.0074
-7 8 11 -2.1820 0.0014
-7 8 12 -3.2464 0.0412
-7 8 13 -8.0511 0.0366
-7 8 14 -5.0953 0.0268
-7 9 1 -0.4239 0.3478
-7 9 2 -0.0381 -0.1111
-7 9 3 -1.3908 -0.2546
-7 9 4 -2.8029 -0.0651
-7 9 5 -1.6890 -0.0097
-7 9 6 -0.6373 -0.0616
-7 9 7 -0.8128 -0.0121
-7 9 8 -0.5306 0.0513
-7 9 9 -0.4627 0.0420
-7 9 10 -0.0115 0.0414
-7 9 11 0.7072 0.0608
-7 9 12 -1.4594 0.0319
-7 9 13 -2.0928 -0.0274
-7 9 14 2.3834 -0.0558
-7 10 1 0.4484 -0.1677
-7 10 2 1.9637 -0.3433
-7 10 3 0.3269 -0.0524
-7 10 4 -1.3329 0.0970
-7 10 5 -0.1798 -0.0058
-7 10 6 0.4904 -0.0057
-7 10 7 -0.1979 0.0844
-7 10 8 0.1170 0.0673
-7 10 9 1.0655 -0.0007
-7 10 10 2.7375 -0.0055
-7 10 11 4.9237 0.0098
-7 10 12 4.9788 -0.0052
-7 10 13 3.6274 -0.0189
-7 11 1 -2.3558 -0.4329
-7 11 2 -3.8927 -0.0996
-7 11 3 -4.3238 0.1967
-7 11 4 -1.2767 0.0863
-7 11 5 2.7860 -0.0093
-7 11 6 3.7066 0.0771
-7 11 7 2.2665 0.0770
-7 11 8 1.1068 -0.0309
-7 11 9 0.6573 -0.0468
-7 11 10 0.6088 0.0106
-7 11 11 -1.6738 -0.0108
-7 11 12 -7.5696 -0.0725
-7 12 1 -0.2920 -0.0906
-7 12 2 1.2718 0.3057
-7 12 3 1.5304 0.1997
-7 12 4 0.3793 -0.0491
-7 12 5 0.0864 -0.0138
-7 12 6 -0.6010 0.0605
-7 12 7 -2.4566 -0.0236
-7 12 8 -1.9507 -0.0803
-7 12 9 1.2993 -0.0173
-7 12 10 2.0969 0.0129
-7 12 11 -1.6326 -0.0253
-7 13 1 -0.5198 0.3137
-7 13 2 -0.7159 0.2663
-7 13 3 -1.5188 -0.0702
-7 13 4 0.5995 -0.1042
-7 13 5 4.3771 0.0192
-7 13 6 3.4804 -0.0224
-7 13 7 0.0559 -0.0922
-7 13 8 0.4964 -0.0367
-7 13 9 1.4416 0.0360
-7 13 10 -1.2910 0.0222
-7 14 1 -1.7516 0.2568
-7 14 2 0.6968 -0.0980
-7 14 3 1.6251 -0.1976
-7 14 4 1.4060 -0.0341
-7 14 5 0.1319 -0.0136
-7 14 6 -2.8968 -0.0553
-7 14 7 -3.4115 0.0062
-7 14 8 -0.1293 0.0521
-7 14 9 1.0648 0.0206
-7 15 1 1.4179 -0.1660
-7 15 2 1.0746 -0.3258
-7 15 3 -0.9708 -0.0570
-7 15 4 -0.6675 0.0802
-7 15 5 0.8711 -0.0030
-7 15 6 -0.0384 0.0151
-7 15 7 -0.3459 0.0565
-7 16 1 1.5928 -0.3081
-7 16 2 1.2103 -0.0161
-7 16 3 -0.0888 0.2032
-7 16 4 0.8571 0.0448
-7 16 5 1.2820 -0.0111
-6 -18 1 1.2373 -0.1907
-6 -17 1 0.5657 -0.3084
-6 -17 2 -2.2790 -0.0129
-6 -17 3 -1.0467 0.1236
-6 -16 1 0.9960 0.0140
-6 -16 2 0.1265 0.2306
-6 -16 3 0.2722 0.0978
-6 -16 4 1.5943 -0.0175
-6 -16 5 1.9712 0.0160
-6 -15 1 -2.9174 0.3401
-6 -15 2 -3.6676 0.1756
-6 -15 3 0.6069 -0.0667
-6 -15 4 3.0480 -0.0767
-6 -15 5 -2.2468 -0.0306
-6 -15 6 -7.4953 -0.0408
-6 -14 1 -3.2775 0.1911
-6 -14 2 -0.9494 -0.1770
-6 -14 3 2.1157 -0.1954
-6 -14 4 0.2558 -0.0411
-6 -14 5 -3.0379 0.0045
-6 -14 6 0.2697 -0.0078
-6 -14 7 5.0771 -0.0156
-6 -14 8 2.6158 -0.0099
-6 -13 1 -1.1922 -0.2573
-6 -13 2 2.3539 -0.2921
-6 -13 3 4.2394 -0.0347
-6 -13 4 2.2618 0.0546
-6 -13 5 -1.0677 0.0153
-6 -13 6 -2.0865 0.0151
-6 -13 7 -2.5719 0.0142
-6 -13 8 -2.0655 0.0189
-6 -13 9 2.2173 0.0600
-6 -12 1 -2.9430 -0.3545
-6 -12 2 0.3203 0.0047
-6 -12 3 2.4509 0.1782
-6 -12 4 -0.8805 0.0840
-6 -12 5 -4.9112 0.0398
-6 -12 6 -2.4504 0.0392
-6 -12 7 2.4796 -0.0098
-6 -12 8 4.6691 -0.0240
-6 -12 9 4.6895 -0.0003
-6 -12 10 1.6112 -0.0212
-6 -11 1 2.6927 0.0589
-6 -11 2 5.6728 0.3149
-6 -11 3 2.6486 0.1264
-6 -11 4 -3.6696 -0.0306
-6 -11 5 -3.4316 0.0040
-6 -11 6 2.8780 -0.0068
-6 -11 7 4.9508 -0.0571
-6 -11 8 3.0817 -0.0280
-6 -11 9 1.9629 0.0125
-6 -11 10 -1.2912 -0.0093
-6 -11 11 -4.5812 -0.0488
-6 -10 1 1.2409 0.4147
-6 -10 2 3.1349 0.1628
-6 -10 3 0.5951 -0.1340
-6 -10 4 -0.7543 -0.0876
-6 -10 5 1.8229 -0.0106
-6 -10 6 3.4309 -0.0676
-6 -10 7 0.7986 -0.0654
-6 -10 8 -1.4078 0.0089
-6 -10 9 -2.3329 0.0254
-6 -10 10 -3.5666 0.0000
-6 -10 11 -0.9835 0.0009
-6 -10 12 3.5830 0.0267
-6 -9 1 3.6643 0.2063
-6 -9 2 0.3965 -0.2338
-6 -9 3 -3.3380 -0.2170
-6 -9 4 -4.5134 -0.0090
-6 -9 5 -2.2677 -0.0009
-6 -9 6 -0.2764 -0.0386
-6 -9 7 -0.9734 0.0174
-6 -9 8 -0.8498 0.0436
-6 -9 9 0.9481 0.0171
-6 -9 10 2.0075 0.0077
-6 -9 11 1.1568 0.0008
-6 -9 12 -2.1849 -0.0080
-6 -8 1 4.3116 -0.3198
-6 -8 2 2.1637 -0.3348
-6 -8 3 -0.2492 0.0073
-6 -8 4 -0.8461 0.1056
-6 -8 5 0.9008 0.0147
-6 -8 6 1.4384 0.0290
-6 -8 7 0.3644 0.0709
-6 -8 8 1.2005 0.0333
-6 -8 9 1.7988 0.0027
-6 -8 10 0.0301 -0.0009
-6 -8 11 -0.8743 -0.0197
-6 -8 12 0.8251 -0.0176
-6 -8 13 3.5215 0.0206
-6 -7 1 -1.4289 -0.3957
-6 -7 2 -2.2926 0.0448
-6 -7 3 -3.4148 0.2339
-6 -7 4 -1.5617 0.0773
-6 -7 5 2.2563 0.0103
-6 -7 6 2.3381 0.0564
-6 -7 7 0.0299 0.0155
-6 -7 8 0.1252 -0.0418
-6 -7 9 0.7108 -0.0227
-6 -7 10 -0.2117 -0.0162
-6 -7 11 -2.4764 -0.0422
-6 -7 12 -5.3148 -0.0249
-6 -7 13 -5.3916 0.0183
-6 -7 14 -3.1825 0.0307
-6 -6 1 3.6887 0.0838
-6 -6 2 -2.8069 0.3621
-6 -6 3 -5.3199 0.1317
-6 -6 4 -2.3604 -0.0557
-6 -6 5 0.7944 -0.0053
-6 -6 6 -0.0666 0.0007
-6 -6 7 -0.7444 -0.0681
-6 -6 8 0.5567 -0.0540
-6 -6 9 0.5075 -0.0107
-6 -6 10 -0.2368 -0.0281
-6 -6 11 -0.0925 -0.0276
-6 -6 12 1.7770 0.0205
-6 -6 13 4.6381 0.0467
-6 -6 14 3.0213 0.0586
-6 -5 1 0.5151 0.4748
-6 -5 2 -0.9981 0.1802
-6 -5 3 1.2855 -0.1651
-6 -5 4 4.4189 -0.1256
-6 -5 5 3.1951 -0.0247
-6 -5 6 -1.8485 -0.0620
-6 -5 7 -3.4806 -0.0687
-6 -5 8 -0.6618 -0.0058
-6 -5 9 1.6002 0.0106
-6 -5 10 0.6069 -0.0006
-6 -5 11 -2.9049 0.0298
-6 -5 12 -4.0723 0.0490
-6 -5 13 -1.9178 0.0367
-6 -5 14 -1.1111 0.0373
-6 -5 15 0.4457 0.0049
-6 -4 1 -5.1824 0.2107
-6 -4 2 -5.5104 -0.2804
-6 -4 3 -2.6655 -0.2621
-6 -4 4 1.2428 -0.0239
-6 -4 5 1.9805 0.0065
-6 -4 6 1.1258 -0.0340
-6 -4 7 3.2264 0.0143
-6 -4 8 5.1202 0.0546
-6 -4 9 3.3335 0.0298
-6 -4 10 -0.1874 0.0139
-6 -4 11 -2.6241 0.0222
-6 -4 12 -1.6396 0.0056
-6 -4 13 0.3678 -0.0034
-6 -4 14 0.4468 0.0111
-6 -4 15 1.1704 -0.0150
-6 -3 1 2.9360 -0.3944
-6 -3 2 -1.1611 -0.4024
-6 -3 3 -1.2699 -0.0048
-6 -3 4 -1.2986 0.1228
-6 -3 5 -3.9906 0.0327
-6 -3 6 -5.0335 0.0416
-6 -3 7 -1.7335 0.0873
-6 -3 8 0.8111 0.0501
-6 -3 9 -0.5922 0.0005
-6 -3 10 -4.0647 0.0055
-6 -3 11 -4.5132 0.0029
-6 -3 12 0.7453 -0.0420
-6 -3 13 4.2841 -0.0493
-6 -3 14 1.5944 -0.0160
-6 -3 15 -1.0811 -0.0204
-6 -2 1 -6.4885 -0.4509
-6 -2 2 -3.2173 0.0616
-6 -2 3 2.7538 0.2861
-6 -2 4 6.5692 0.1001
-6 -2 5 4.9693 0.0106
-6 -2 6 2.7006 0.0585
-6 -2 7 2.8576 0.0270
-6 -2 8 1.1729 -0.0368
-6 -2 9 -3.1777 -0.0335
-6 -2 10 -4.6194 -0.0125
-6 -2 11 -0.6114 -0.0337
-6 -2 12 1.9484 -0.0410
-6 -2 13 -1.0958 0.0144
-6 -2 14 -0.5285 0.0416
-6 -2 15 5.0289 -0.0011
-6 -2 16 3.7587 -0.0101
-6 -1 1 -3.1392 0.1274
-6 -1 2 -0.5868 0.4352
-6 -1 3 1.9688 0.1532
-6 -1 4 0.7578 -0.0769
-6 -1 5 -2.3166 -0.0100
-6 -1 6 -0.5086 0.0119
-6 -1 7 2.7323 -0.0642
-6 -1 8 0.9711 -0.0694
-6 -1 9 -0.5288 -0.0302
-6 -1 10 2.6586 -0.0254
-6 -1 11 3.7435 -0.0285
-6 -1 12 -0.2808 0.0036
-6 -1 13 -0.1630 0.0444
-6 -1 14 5.0706 0.0487
-6 -1 15 1.7525 0.0419
-6 -1 16 -5.8525 0.0430
-6 0 1 0.8848 0.5074
-6 0 2 -0.0163 0.1834
-6 0 3 0.0654 -0.1950
-6 0 4 -2.3784 -0.1248
-6 0 5 -4.1585 0.0094
-6 0 6 -3.3314 -0.0410
-6 0 7 -3.8443 -0.0589
-6 0 8 -4.4018 0.0049
-6 0 9 -1.4759 0.0253
-6 0 10 0.2877 0.0196
-6 0 11 -1.3226 0.0344
-6 0 12 0.7063 0.0382
-6 0 13 6.5243 0.0213
-6 0 14 3.9792 0.0043
-6 0 15 -6.6854 -0.0136
-6 0 16 -6.8954 -0.0269
-6 1 1 -3.2709 0.1932
-6 1 2 2.4080 -0.3002
-6 1 3 4.5414 -0.2526
-6 1 4 3.7741 0.0198
-6 1 5 2.1555 0.0298
-6 1 6 1.5481 -0.0435
-6 1 7 2.6349 0.0094
-6 1 8 3.9477 0.0537
-6 1 9 2.3264 0.0305
-6 1 10 -1.7774 0.0288
-6 1 11 -3.7413 0.0319
-6 1 12 -2.2669 0.0023
-6 1 13 -1.4085 -0.0076
-6 1 14 -3.7251 -0.0010
-6 1 15 -3.0372 -0.0225
-6 1 16 5.4977 -0.0252
-6 2 1 0.8314 -0.3782
-6 2 2 0.1003 -0.3773
-6 2 3 -1.3566 0.0280
-6 2 4 -3.2289 0.1369
-6 2 5 -2.8022 0.0039
-6 2 6 0.9588 0.0064
-6 2 7 2.6846 0.0741
-6 2 8 -0.0628 0.0349
-6 2 9 -1.2190 -0.0149
-6 2 10 2.1102 0.0004
-6 2 11 4.7144 -0.0103
-6 2 12 4.9920 -0.0475
-6 2 13 4.9365 -0.0335
-6 2 14 1.9570 -0.0139
-6 2 16 -2.0187 0.0118
-6 3 1 0.3827 -0.4348
-6 3 2 -0.9915 0.0836
-6 3 3 -2.6482 0.2905
-6 3 4 -4.0063 0.0715
-6 3 5 -3.8593 -0.0275
-6 3 6 -3.0094 0.0520
-6 3 7 -2.9124 0.0360
-6 3 8 -2.2155 -0.0451
-6 3 9 -0.8731 -0.0347
-6 3 10 -1.9035 0.0027
-6 3 11 -3.0290 -0.0288
-6 3 12 0.9537 -0.0394
-6 3 13 3.6971 0.0065
-6 3 14 -2.4707 0.0064
-6 3 15 -7.1302 -0.0115
-6 4 1 -0.9522 0.1276
-6 4 2 0.4553 0.4196
-6 4 3 2.5475 0.1290
-6 4 4 4.6099 -0.0944
-6 4 5 6.2141 -0.0126
-6 4 6 6.8184 0.0206
-6 4 7 5.3722 -0.0586
-6 4 8 2.5691 -0.0581
-6 4 9 0.9619 0.0046
-6 4 10 0.9514 -0.0019
-6 4 11 0.6179 -0.0400
-6 4 12 -1.4808 -0.0058
-6 4 13 -5.9234 0.0329
-6 4 14 -8.3233 0.0110
-6 4 15 -2.1871 0.0191
-6 5 1 -2.7820 0.5044
-6 5 2 -0.2790 0.1693
-6 5 3 -0.0854 -0.2097
-6 5 4 -1.7571 -0.1272
-6 5 5 -3.0943 0.0179
-6 5 6 -3.1083 -0.0354
-6 5 7 -3.3560 -0.0694
-6 5 8 -3.3123 -0.0085
-6 5 9 -1.0181 0.0221
-6 5 10 1.1705 0.0030
-6 5 11 1.6020 0.0134
-6 5 12 3.0576 0.0457
-6 5 13 4.0478 0.0199
-6 5 14 1.9913 -0.0177
-6 5 15 1.0628 0.0058
-6 5 16 1.4640 0.0078
-6 6 1 4.5037 0.1631
-6 6 2 2.6978 -0.3203
-6 6 3 0.1010 -0.2466
-6 6 4 -0.4490 0.0372
-6 6 5 0.3750 0.0285
-6 6 6 0.7906 -0.0582
-6 6 7 0.6956 0.0105
-6 6 8 1.4815 0.0750
-6 6 9 1.7248 0.0344
-6 6 10 -1.2643 -0.0020
-6 6 11 -3.3783 0.0304
-6 6 12 -0.5333 0.0479
-6 6 13 0.9012 0.0041
-6 6 14 -1.9038 -0.0154
-6 6 15 -1.4741 -0.0090
-6 6 16 1.9783 -0.0532
-6 7 1 0.5807 -0.3705
-6 7 2 -0.2898 -0.3524
-6 7 3 1.3354 0.0546
-6 7 4 2.9123 0.1480
-6 7 5 1.7492 -0.0053
-6 7 6 0.7275 0.0030
-6 7 7 0.8373 0.0890
-6 7 8 -0.2566 0.0496
-6 7 9 -2.1755 -0.0126
-6 7 10 -2.1320 0.0114
-6 7 11 0.7411 0.0223
-6 7 12 2.4905 -0.0532
-6 7 13 -0.6719 -0.0926
-6 7 14 -3.1344 -0.0274
-6 7 15 0.6431 0.0049
-6 8 1 0.8150 -0.3844
-6 8 2 -0.0608 0.1061
-6 8 3 0.0603 0.2882
-6 8 4 -2.0107 0.0586
-6 8 5 -3.5438 -0.0393
-6 8 6 -1.4479 0.0553
-6 8 7 -0.2239 0.0380
-6 8 8 -1.1015 -0.0638
-6 8 9 -0.0728 -0.0603
-6 8 10 1.6086 -0.0058
-6 8 11 1.6703 -0.0258
-6 8 12 1.5032 -0.0551
-6 8 13 0.1685 -0.0087
-6 8 14 -2.1600 0.0132
-6 8 15 -1.9687 -0.0408
-6 9 1 1.0352 0.1200
-6 9 2 1.6706 0.3739
-6 9 3 1.8817 0.1098
-6 9 4 -0.3052 -0.0904
-6 9 5 -0.5525 -0.0142
-6 9 6 0.7960 0.0138
-6 9 7 0.0804 -0.0647
-6 9 8 -0.5891 -0.0576
-6 9 9 -0.3121 0.0061
-6 9 10 -1.4173 -0.0071
-6 9 11 -0.4772 -0.0416
-6 9 12 3.4447 0.0042
-6 9 13 3.5540 0.0665
-6 9 14 1.2913 0.0473
-6 9 15 2.7882 0.0092
-6 10 1 -0.9731 0.4472
-6 10 2 -0.8491 0.1133
-6 10 3 -1.4750 -0.2127
-6 10 4 -1.3945 -0.1251
-6 10 5 0.7890 -0.0063
-6 10 6 2.2548 -0.0566
-6 10 7 1.3053 -0.0661
-6 10 8 -0.3583 0.0070
-6 10 9 -1.7524 0.0280
-6 10 10 -1.6308 0.0109
-6 10 11 0.8856 0.0304
-6 10 12 0.8265 0.0443
-6 10 13 -3.9801 0.0079
-6 10 14 -5.2938 -0.0342
-6 11 1 2.5999 0.1072
-6 11 2 2.2814 -0.3027
-6 11 3 0.0746 -0.1961
-6 11 4 -2.0535 0.0393
-6 11 5 -2.2597 0.0102
-6 11 6 -1.9717 -0.0407
-6 11 7 -2.4963 0.0392
-6 11 8 -2.4062 0.0728
-6 11 9 -0.6732 0.0153
-6 11 10 1.3855 0.0004
-6 11 11 2.8851 0.0323
-6 11 12 3.7919 0.0241
-6 11 13 4.4570 -0.0100
-6 12 1 -0.1184 -0.3790
-6 12 2 -1.7003 -0.2908
-6 12 3 -2.0466 0.0879
-6 12 4 0.7314 0.1252
-6 12 5 3.0400 -0.0205
-6 12 6 2.9704 0.0058
-6 12 7 1.8512 0.0815
-6 12 8 0.8020 0.0395
-6 12 9 -0.0201 -0.0127
-6 12 10 0.6544 0.0131
-6 12 11 3.8509 0.0141
-6 12 12 4.6316 -0.0359
-6 12 13 -2.1182 -0.0363
-6 13 1 -1.3301 -0.3282
-6 13 2 -1.3282 0.1090
-6 13 3 1.0200 0.2441
-6 13 4 1.0235 0.0292
-6 13 5 -1.8001 -0.0289
-6 13 6 -2.5816 0.0672
-6 13 7 -1.9284 0.0436
-6 13 8 -1.8076 -0.0605
-6 13 9 -0.5359 -0.0651
-6 13 10 1.5944 -0.0069
-6 13 11 1.2600 -0.0204
-6 13 12 -2.6941 -0.0296
-6 14 1 0.8219 0.1408
-6 14 2 -0.5336 0.3270
-6 14 3 -0.2862 0.0523
-6 14 4 -1.1394 -0.1149
-6 14 5 -0.5870 -0.0222
-6 14 6 2.0040 0.0078
-6 14 7 2.0874 -0.0519
-6 14 8 0.7179 -0.0420
-6 14 9 0.9532 0.0233
-6 14 10 1.3680 0.0208
-6 14 11 1.1739 -0.0286
-6 15 1 -1.3924 0.3220
-6 15 2 1.8649 0.0825
-6 15 3 3.2297 -0.1581
-6 15 4 0.1345 -0.0670
-6 15 5 -1.4124 0.0058
-6 15 6 -0.2099 -0.0503
-6 15 7 -0.6029 -0.0408
-6 15 8 -1.5771 0.0091
-6 15 9 -1.2854 0.0140
-6 16 1 -2.2033 0.0532
-6 16 2 -1.6743 -0.3079
-6 16 3 -1.9101 -0.1852
-6 16 4 -2.6834 0.0497
-6 16 5 -0.0459 0.0042
-6 16 6 2.0578 -0.0321
-6 16 7 0.3523 0.0481
-6 17 1 1.8592 -0.2808
-6 17 2 3.1262 -0.2089
-6 17 3 0.0052 0.1150
-6 17 4 -1.7206 0.0838
-5 -18 1 -0.3744 0.2801
-5 -18 2 -1.6471 -0.0280
-5 -17 1 1.9498 0.0111
-5 -17 2 1.9847 -0.2295
-5 -17 3 0.0126 -0.1096
-5 -17 4 -1.5348 0.0335
-5 -16 1 2.0235 -0.3001
-5 -16 2 0.0333 -0.1802
-5 -16 3 -0.2362 0.0690
-5 -16 4 0.8747 0.1069
-5 -16 5 0.1036 0.0439
-5 -16 6 -2.5917 0.0264
-5 -15 1 0.5793 -0.1986
-5 -15 2 -1.9347 0.1256
-5 -15 3 -3.1957 0.1693
-5 -15 4 -2.4476 0.0419
-5 -15 5 0.2827 -0.0100
-5 -15 6 2.5288 -0.0139
-5 -15 7 2.9503 -0.0193
-5 -14 1 1.9311 0.2130
-5 -14 2 0.1771 0.2704
-5 -14 3 -0.2251 0.0462
-5 -14 4 2.3229 -0.0449
-5 -14 5 2.5320 -0.0175
-5 -14 6 -2.2953 -0.0217
-5 -14 7 -5.1274 -0.0239
-5 -14 8 -4.2049 -0.0156
-5 -14 9 -3.5633 -0.0413
-5 -13 1 -2.7943 0.3587
-5 -13 2 -5.9324 0.0027
-5 -13 3 -3.3370 -0.1742
-5 -13 4 1.0650 -0.0742
-5 -13 5 0.5420 -0.0172
-5 -13 6 -1.0619 -0.0232
-5 -13 7 1.4079 0.0092
-5 -13 8 1.6611 0.0166
-5 -13 9 -0.3927 -0.0215
-5 -13 10 2.9529 -0.0182
-5 -12 1 -2.2721 -0.0204
-5 -12 2 -1.6298 -0.3030
-5 -12 3 0.6802 -0.1345
-5 -12 4 1.5015 0.0313
-5 -12 5 -0.7804 0.0083
-5 -12 6 -2.2044 0.0030
-5 -12 7 -2.0639 0.0295
-5 -12 8 -3.0074 -0.0005
-5 -12 9 -0.8041 -0.0151
-5 -12 10 3.9427 0.0373
-5 -12 11 2.4810 0.0639
-5 -11 1 -3.5342 -0.4112
-5 -11 2 -1.7445 -0.2103
-5 -11 3 3.4537 0.1084
-5 -11 4 6.2861 0.1051
-5 -11 5 2.4981 0.0158
-5 -11 6 -1.7816 0.0341
-5 -11 7 -2.2701 0.0387
-5 -11 8 -1.1954 -0.0037
-5 -11 9 1.1050 -0.0122
-5 -11 10 2.5071 0.0044
-5 -11 11 0.8361 -0.0017
-5 -11 12 -0.3200 -0.0197
-5 -10 1 -3.1510 -0.2449
-5 -10 2 -0.8269 0.2026
-5 -10 3 2.0727 0.2272
-5 -10 4 -1.2901 0.0153
-5 -10 5 -6.4997 -0.0185
-5 -10 6 -4.4017 0.0389
-5 -10 7 1.6248 0.0091
-5 -10 8 4.4357 -0.0412
-5 -10 9 5.0188 -0.0364
-5 -10 10 3.7469 -0.0147
-5 -10 11 0.3284 -0.0163
-5 -10 12 -1.9738 -0.0347
-5 -9 1 -0.5664 0.2905
-5 -9 2 4.9710 0.3519
-5 -9 3 5.7886 0.0182
-5 -9 4 1.5999 -0.1102
-5 -9 5 -1.1965 -0.0131
-5 -9 6 0.6454 0.0051
-5 -9 7 2.0630 -0.0480
-5 -9 8 0.4192 -0.0436
-5 -9 9 -1.8082 -0.0112
-5 -9 10 -3.2248 0.0002
-5 -9 11 -2.0697 0.0099
-5 -9 12 0.8979 0.0197
-5 -9 13 2.2481 0.0101
-5 -8 1 0.3130 0.4293
-5 -8 2 4.2968 -0.0156
-5 -8 3 2.1302 -0.2407
-5 -8 4 -2.3012 -0.0816
-5 -8 5 -2.6621 0.0279
-5 -8 6 1.3645 -0.0184
-5 -8 7 2.7641 -0.0277
-5 -8 8 -0.2259 0.0096
-5 -8 9 -1.8818 0.0151
-5 -8 10 0.6651 0.0206
-5 -8 11 3.1587 0.0388
-5 -8 12 0.1863 0.0170
-5 -8 13 -4.0458 -0.0306
-5 -8 14 -2.7589 -0.0388
-5 -7 1 4.2711 -0.0659
-5 -7 2 0.8466 -0.3739
-5 -7 3 -3.5759 -0.1490
-5 -7 4 -5.9088 0.0678
-5 -7 5 -4.2567 0.0200
-5 -7 6 -0.6451 -0.0209
-5 -7 7 0.0044 0.0370
-5 -7 8 -1.0617 0.0441
-5 -7 9 0.1069 0.0058
-5 -7 10 2.1569 0.0155
-5 -7 11 1.7732 0.0292
-5 -7 12 0.4001 -0.0080
-5 -7 13 2.8953 -0.0394
-5 -7 14 5.6792 -0.0189
-5 -6 1 4.4345 -0.4683
-5 -6 2 5.3524 -0.1807
-5 -6 3 2.2248 0.1788
-5 -6 4 -0.6993 0.1324
-5 -6 5 1.0567 0.0026
-5 -6 6 3.7291 0.0434
-5 -6 7 1.3553 0.0735
-5 -6 8 -2.0766 0.0040
-5 -6 9 -1.2473 -0.0254
-5 -6 10 1.4377 0.0049
-5 -6 11 1.0526 -0.0075
-5 -6 12 -2.0215 -0.0433
-5 -6 13 -2.9044 -0.0314
-5 -6 14 -2.4236 0.0027
-5 -6 15 -3.0904 0.0209
-5 -5 1 1.2085 -0.1887
-5 -5 2 -2.1488 0.2962
-5 -5 3 -5.2952 0.2451
-5 -5 4 -4.0415 -0.0166
-5 -5 5 1.1848 -0.0245
-5 -5 6 3.8690 0.0536
-5 -5 7 1.8688 -0.0029
-5 -5 8 0.1909 -0.0706
-5 -5 9 0.7613 -0.0419
-5 -5 10 1.3771 -0.0129
-5 -5 11 0.0842 -0.0281
-5 -5 12 -1.2286 -0.0248
-5 -5 13 0.1355 -0.0110
-5 -5 14 -0.3674 -0.0114
-5 -5 15 -4.1272 0.0117
-5 -4 1 4.3838 0.3525
-5 -4 2 -1.3758 0.3418
-5 -4 3 -4.9218 -0.0393
-5 -4 4 -3.8205 -0.1309
-5 -4 5 -0.2975 -0.0129
-5 -4 6 -0.4332 -0.0182
-5 -4 7 -3.8681 -0.0812
-5 -4 8 -4.2620 -0.0522
-5 -4 9 -0.1970 0.0034
-5 -4 10 2.9909 0.0094
-5 -4 11 1.3162 0.0169
-5 -4 12 -0.3814 0.0344
-5 -4 13 1.1147 0.0137
-5 -4 14 -0.1152 -0.0051
-5 -4 15 -2.0502 0.0129
-5 -4 16 1.4756 0.0279
-5 -3 1 4.5711 0.4329
-5 -3 2 1.6851 -0.0642
-5 -3 3 1.0715 -0.2719
-5 -3 4 4.0804 -0.0904
-5 -3 5 6.4745 0.0012
-5 -3 6 3.5011 -0.0468
-5 -3 7 -0.8961 -0.0321
-5 -3 8 -1.0464 0.0252
-5 -3 9 1.1405 0.0303
-5 -3 10 0.5822 0.0164
-5 -3 11 -2.4373 0.0288
-5 -3 12 -2.8766 0.0234
-5 -3 13 -1.9198 -0.0036
-5 -3 14 -2.3542 0.0012
-5 -3 15 1.3569 0.0154
-5 -3 16 6.4998 0.0127
-5 -2 1 -1.3899 -0.0995
-5 -2 2 -6.2126 -0.4008
-5 -2 3 -5.9131 -0.1475
-5 -2 4 -2.4353 0.0658
-5 -2 5 0.2421 0.0144
-5 -2 6 -0.4993 -0.0045
-5 -2 7 -1.4565 0.0630
-5 -2 8 0.7899 0.0652
-5 -2 9 3.7357 0.0132
-5 -2 10 2.5088 0.0015
-5 -2 11 -0.6482 0.0122
-5 -2 12 0.1018 -0.0175
-5 -2 13 0.7986 -0.0533
-5 -2 14 -2.4881 -0.0482
-5 -2 15 -4.0463 -0.0237
-5 -2 16 -3.6506 0.0043
-5 -1 1 -2.8498 -0.5132
-5 -1 2 -6.5835 -0.1986
-5 -1 3 -4.1799 0.1869
-5 -1 4 0.6776 0.1427
-5 -1 5 2.0807 0.0145
-5 -1 6 -2.5803 0.0512
-5 -1 7 -4.8495 0.0655
-5 -1 8 0.1038 -0.0060
-5 -1 9 2.6462 -0.0357
-5 -1 10 -2.5378 -0.0081
-5 -1 11 -4.3325 -0.0040
-5 -1 12 0.6629 -0.0245
-5 -1 13 1.0123 -0.0178
-5 -1 14 -0.2429 -0.0009
-5 -1 15 6.1231 -0.0026
-5 -1 16 8.7249 -0.0000
-5 -1 17 0.9054 0.0090
-5 0 1 -1.3119 -0.1956
-5 0 2 4.0183 0.3088
-5 0 3 7.4740 0.2646
-5 0 4 9.3343 -0.0162
-5 0 5 5.4645 -0.0308
-5 0 6 -0.8581 0.0487
-5 0 7 -0.2951 -0.0077
-5 0 8 2.1591 -0.0664
-5 0 9 -2.7328 -0.0363
-5 0 10 -5.8677 -0.0103
-5 0 11 0.5795 -0.0146
-5 0 12 2.1123 0.0005
-5 0 13 -5.3261 0.0167
-5 0 14 -2.8622 0.0066
-5 0 15 5.8914 0.0126
-5 0 16 1.5643 0.0412
-5 0 17 -3.7949 0.0385
-5 1 1 -4.1154 0.3905
-5 1 2 -6.6506 0.3794
-5 1 3 -4.1259 -0.0338
-5 1 4 -1.9169 -0.1486
-5 1 5 -4.2436 -0.0112
-5 1 6 -4.1098 -0.0073
-5 1 7 1.5461 -0.0782
-5 1 8 3.6389 -0.0421
-5 1 9 1.3239 0.0121
-5 1 10 3.5938 0.0056
-5 1 11 6.1749 0.0187
-5 1 12 1.3255 0.0448
-5 1 13 1.3013 0.0142
-5 1 14 10.0664 -0.0144
-5 1 15 5.7859 0.0112
-5 1 16 -9.9556 0.0242
-5 1 17 -10.0789 0.0062
-5 2 1 -1.4475 0.4111
-5 2 2 -0.1887 -0.0667
-5 2 3 1.9199 -0.2709
-5 2 4 0.7813 -0.0694
-5 2 5 -3.3975 0.0377
-5 2 6 -4.7500 -0.0398
-5 2 7 -2.3081 -0.0394
-5 2 8 -1.3112 0.0391
-5 2 9 -2.0158 0.0361
-5 2 10 -1.7522 0.0071
-5 2 11 -3.2743 0.0384
-5 2 12 -5.0396 0.0349
-5 2 13 -0.4486 -0.0137
-5 2 14 2.0184 -0.0036
-5 2 15 -6.2350 0.0174
-5 2 16 -7.7193 -0.0114
-5 3 1 -0.7774 -0.0927
-5 3 2 3.5476 -0.3953
-5 3 3 6.3765 -0.1470
-5 3 4 4.4673 0.0857
-5 3 5 1.6058 0.0251
-5 3 6 3.8105 -0.0361
-5 3 7 7.1719 0.0388
-5 3 8 3.8637 0.0689
-5 3 9 -1.8357 0.0037
-5 3 10 -2.0041 -0.0031
-5 3 11 -0.1693 0.0307
-5 3 12 0.4844 -0.0145
-5 3 13 2.7941 -0.0477
-5 3 14 2.3883 -0.0111
-5 3 15 -1.2788 -0.0167
-5 3 16 1.7671 -0.0338
-5 4 1 -5.5352 -0.4783
-5 4 2 -3.1871 -0.1797
-5 4 3 -3.0541 0.1870
-5 4 4 -5.2267 0.1368
-5 4 5 -5.4193 -0.0119
-5 4 6 -2.5958 0.0240
-5 4 7 -1.5239 0.0842
-5 4 8 -3.1563 0.0186
-5 4 9 -1.4416 -0.0459
-5 4 10 3.4901 -0.0046
-5 4 11 5.3451 0.0131
-5 4 12 5.9850 -0.0278
-5 4 13 6.8416 -0.0078
-5 4 14 0.6937 0.0095
-5 4 15 -8.0909 -0.0369
-5 5 1 2.9567 -0.1813
-5 5 2 2.8462 0.2822
-5 5 3 -0.1303 0.2460
-5 5 4 -2.0162 -0.0145
-5 5 5 -0.2821 -0.0498
-5 5 6 2.3258 0.0233
-5 5 7 2.6964 -0.0008
-5 5 8 1.5672 -0.0595
-5 5 9 1.0069 -0.0391
-5 5 10 -0.3966 -0.0003
-5 5 11 -3.6730 -0.0301
-5 5 12 -5.8604 -0.0327
-5 5 13 -6.8940 0.0230
-5 5 14 -7.4911 0.0138
-5 5 15 -2.6158 -0.0090
-5 5 16 5.7859 0.0363
-5 6 1 -0.8240 0.3526
-5 6 2 1.3356 0.3486
-5 6 3 1.9444 -0.0334
-5 6 4 3.8737 -0.1427
-5 6 5 4.4612 -0.0158
-5 6 6 2.5975 0.0086
-5 6 7 0.2078 -0.0532
-5 6 8 -1.9918 -0.0555
-5 6 9 -2.5383 -0.0047
-5 6 10 -0.3686 0.0127
-5 6 11 1.8684 0.0053
-5 6 12 1.7267 0.0354
-5 6 13 0.4225 0.0384
-5 6 14 0.7112 -0.0087
-5 6 15 2.9170 0.0087
-5 6 16 3.4961 0.0514
-5 6 17 1.2995 0.0195
-5 7 1 -1.4392 0.3684
-5 7 2 -2.9207 -0.0788
-5 7 3 -3.4122 -0.2614
-5 7 4 -2.5677 -0.0651
-5 7 5 -2.2200 0.0380
-5 7 6 -1.0898 -0.0242
-5 7 7 0.6787 -0.0267
-5 7 8 1.6009 0.0353
-5 7 9 2.7629 0.0413
-5 7 10 2.8779 -0.0007
-5 7 11 -0.5473 0.0131
-5 7 12 -3.0469 0.0625
-5 7 13 -0.2445 0.0325
-5 7 14 2.5624 -0.0219
-5 7 15 0.2015 -0.0148
-5 7 16 -3.3184 -0.0271
-5 8 1 1.3530 -0.0993
-5 8 2 0.8784 -0.3771
-5 8 3 2.1111 -0.1291
-5 8 4 3.7255 0.1012
-5 8 5 2.3302 0.0377
-5 8 6 -0.4588 -0.0314
-5 8 7 -1.8338 0.0303
-5 8 8 -1.7060 0.0666
-5 8 9 -1.6408 0.0201
-5 8 10 -3.0919 0.0016
-5 8 11 -4.4475 0.0407
-5 8 12 -2.1254 0.0211
-5 8 13 2.2495 -0.0518
-5 8 14 3.4020 -0.0400
-5 8 15 2.2407 0.0003
-5 8 16 2.9104 -0.0410
-5 9 1 -1.9801 -0.4221
-5 9 2 -1.2448 -0.1451
-5 9 3 1.9387 0.1950
-5 9 4 2.7565 0.1411
-5 9 5 -0.3615 -0.0146
-5 9 6 -1.0649 0.0115
-5 9 7 2.0162 0.0639
-5 9 8 3.0643 -0.0018
-5 9 9 0.7949 -0.0625
-5 9 10 -0.8433 -0.0187
-5 9 11 -0.5384 0.0154
-5 9 12 0.7763 -0.0406
-5 9 13 1.3279 -0.0611
-5 9 14 -1.2052 -0.0005
-5 9 15 -4.1973 0.0120
-5 9 16 -2.8871 0.0067
-5 10 1 -0.7532 -0.1695
-5 10 2 1.3253 0.2727
-5 10 3 2.4394 0.2491
-5 10 4 -1.6476 -0.0018
-5 10 5 -5.3215 -0.0481
-5 10 6 -2.7772 0.0211
-5 10 7 1.0324 -0.0039
-5 10 8 0.6453 -0.0582
-5 10 9 -0.9384 -0.0301
-5 10 10 -1.2023 0.0074
-5 10 11 -1.4413 -0.0217
-5 10 12 0.2046 -0.0351
-5 10 13 3.6352 0.0182
-5 10 14 3.9822 0.0289
-5 10 15 2.3925 -0.0330
-5 11 1 0.4742 0.3298
-5 11 2 2.2516 0.3025
-5 11 3 1.4989 -0.0465
-5 11 4 -0.3860 -0.1306
-5 11 5 0.4721 -0.0155
-5 11 6 3.4777 -0.0118
-5 11 7 4.1679 -0.0712
-5 11 8 0.9554 -0.0388
-5 11 9 -2.5069 0.0216
-5 11 10 -3.1034 0.0083
-5 11 11 -0.9009 -0.0109
-5 11 12 2.4447 0.0230
-5 11 13 2.3436 0.0450
-5 11 14 -2.2687 0.0238
-5 12 1 0.6199 0.3536
-5 12 2 0.1619 -0.0804
-5 12 3 -1.4337 -0.2456
-5 12 4 -2.3879 -0.0699
-5 12 5 -0.8985 0.0076
-5 12 6 1.2967 -0.0437
-5 12 7 0.5990 -0.0205
-5 12 8 -2.5853 0.0423
-5 12 9 -2.8199 0.0189
-5 12 10 -0.2695 -0.0176
-5 12 11 -0.1404 0.0255
-5 12 12 -1.0267 0.0420
-5 12 13 0.8320 -0.0149
-5 12 14 4.2107 -0.0415
-5 13 1 1.8830 -0.1104
-5 13 2 0.5647 -0.3410
-5 13 3 -1.0210 -0.0866
-5 13 4 0.0031 0.1047
-5 13 5 1.4984 0.0216
-5 13 6 1.5962 -0.0324
-5 13 7 0.8062 0.0418
-5 13 8 0.2630 0.0699
-5 13 9 0.8084 0.0031
-5 13 10 0.5856 -0.0115
-5 13 11 0.6989 0.0267
-5 13 12 4.3287 -0.0046
-5 13 13 5.1992 -0.0296
-5 14 1 -0.3609 -0.4115
-5 14 2 -0.1425 -0.1455
-5 14 3 1.4459 0.1764
-5 14 4 2.8640 0.1184
-5 14 5 1.1154 -0.0060
-5 14 6 -0.3896 0.0304
-5 14 7 -0.6236 0.0615
-5 14 8 -1.6833 -0.0219
-5 14 9 -2.3680 -0.0793
-5 14 10 -2.1555 -0.0032
-5 14 11 -1.1538 0.0351
-5 14 12 0.3418 -0.0265
-5 15 1 -2.0457 -0.1032
-5 15 2 -4.2198 0.2551
-5 15 3 -1.6913 0.1908
-5 15 4 0.8413 -0.0241
-5 15 5 0.6243 -0.0317
-5 15 6 0.9169 0.0204
-5 15 7 0.7623 -0.0076
-5 15 8 -0.4185 -0.0478
-5 15 9 -0.0926 -0.0221
-5 15 10 0.8764 0.0097
-5 15 11 1.8589 -0.0561
-5 16 1 1.4632 0.2520
-5 16 2 4.0403 0.2428
-5 16 3 5.2791 -0.0501
-5 16 4 1.0323 -0.1055
-5 16 5 -3.7303 -0.0149
-5 16 6 -2.9484 -0.0323
-5 16 7 -0.4344 -0.0714
-5 16 8 0.2334 -0.0534
-5 16 9 -0.1503 -0.0085
-5 17 1 -2.1041 0.2643
-5 17 2 -1.9352 -0.1028
-5 17 3 -0.0595 -0.2108
-5 17 4 -0.4965 0.0016
-5 17 5 -0.6737 0.0318
-5 17 6 0.8552 -0.0595
-4 -18 1 1.1800 0.0173
-4 -18 2 2.2759 0.1951
-4 -17 1 -1.8727 0.2814
-4 -17 2 0.0531 0.1253
-4 -17 3 0.6995 -0.0825
-4 -17 4 2.0236 -0.0755
-4 -17 5 2.4675 -0.0159
-4 -16 1 -0.8027 0.1717
-4 -16 2 -0.1751 -0.1241
-4 -16 3 -0.1932 -0.1486
-4 -16 4 -0.4553 -0.0331
-4 -16 5 -0.3332 0.0018
-4 -16 6 0.4684 0.0057
-4 -15 1 4.5834 -0.1817
-4 -15 2 6.0385 -0.2447
-4 -15 3 3.9614 -0.0422
-4 -15 4 1.3399 0.0606
-4 -15 5 0.4632 0.0471
-4 -15 6 0.0941 0.0519
-4 -15 7 -0.7373 0.0454
-4 -15 8 -0.0095 -0.0033
-4 -14 1 1.7822 -0.3146
-4 -14 2 -0.8936 -0.0152
-4 -14 3 -2.5794 0.1468
-4 -14 4 -2.5664 0.0620
-4 -14 5 -0.7817 -0.0019
-4 -14 6 0.3583 0.0147
-4 -14 7 0.5596 0.0027
-4 -14 8 1.8971 -0.0235
-4 -14 9 2.2708 0.0029
-4 -13 1 1.2387 0.0192
-4 -13 2 0.9345 0.2697
-4 -13 3 -1.4625 0.1229
-4 -13 4 -2.4324 -0.0379
-4 -13 5 -0.1668 -0.0137
-4 -13 6 0.2508 0.0217
-4 -13 7 -1.0048 -0.0216
-4 -13 8 -0.8921 -0.0471
-4 -13 9 -2.8357 -0.0139
-4 -13 10 -6.3079 0.0104
-4 -12 1 4.1980 0.3665
-4 -12 2 0.6271 0.1903
-4 -12 3 -1.4742 -0.1060
-4 -12 4 1.4955 -0.1081
-4 -12 5 3.8016 -0.0020
-4 -12 6 0.9550 -0.0022
-4 -12 7 -0.6126 -0.0303
-4 -12 8 -0.0561 0.0024
-4 -12 9 -2.6749 0.0324
-4 -12 10 -3.6244 0.0091
-4 -12 11 0.7270 -0.0129
-4 -11 1 -2.1862 0.2330
-4 -11 2 -5.2000 -0.1739
-4 -11 3 -4.5705 -0.2232
-4 -11 4 -1.6544 -0.0352
-4 -11 5 -0.8509 0.0279
-4 -11 6 -1.4976 -0.0076
-4 -11 7 0.1190 0.0001
-4 -11 8 0.7808 0.0279
-4 -11 9 -0.2771 0.0208
-4 -11 10 1.7765 0.0070
-4 -11 11 3.7917 0.0105
-4 -11 12 1.7121 0.0030
-4 -10 1 -0.4880 -0.2147
-4 -10 2 -1.3380 -0.3134
-4 -10 3 0.4134 -0.0485
-4 -10 4 3.8398 0.0922
-4 -10 5 3.4192 0.0372
-4 -10 6 -0.2147 0.0009
-4 -10 7 -2.1950 0.0204
-4 -10 8 -3.0848 0.0253
-4 -10 9 -3.4124 0.0076
-4 -10 10 -2.2474 -0.0064
-4 -10 11 -1.2596 -0.0122
-4 -10 12 0.1072 -0.0145
-4 -10 13 2.1626 -0.0154
-4 -9 1 -3.2533 -0.3884
-4 -9 2 -2.2201 -0.0469
-4 -9 3 2.4165 0.1856
-4 -9 4 4.5116 0.1015
-4 -9 5 0.7577 -0.0024
-4 -9 6 -2.2667 0.0073
-4 -9 7 -0.4721 0.0266
-4 -9 8 1.9163 0.0071
-4 -9 9 3.0167 -0.0151
-4 -9 10 3.3560 -0.0209
-4 -9 11 2.3331 -0.0192
-4 -9 12 0.9277 -0.0146
-4 -9 13 -0.8658 -0.0018
-4 -9 14 -2.7345 0.0134
-4 -8 1 -3.8423 -0.0040
-4 -8 2 -3.6268 0.3151
-4 -8 3 -0.4860 0.1704
-4 -8 4 -0.2146 -0.0444
-4 -8 5 -3.0050 -0.0529
-4 -8 6 -3.4695 0.0010
-4 -8 7 -0.5943 -0.0080
-4 -8 8 1.5540 -0.0288
-4 -8 9 0.7359 -0.0236
-4 -8 10 -2.2385 -0.0196
-4 -8 11 -3.1332 -0.0175
-4 -8 12 0.1226 0.0035
-4 -8 13 2.6544 0.0239
-4 -8 14 2.8341 0.0083
-4 -7 1 -0.4659 0.4214
-4 -7 2 7.7257 0.2214
-4 -7 3 10.4806 -0.1124
-4 -7 4 5.1239 -0.1294
-4 -7 5 -1.4925 -0.0100
-4 -7 6 -1.8725 0.0016
-4 -7 7 1.7407 -0.0312
-4 -7 8 2.3325 -0.0078
-4 -7 9 -0.7690 0.0186
-4 -7 10 -2.0289 0.0024
-4 -7 11 1.2142 -0.0021
-4 -7 12 2.5707 0.0245
-4 -7 13 -1.5909 0.0333
-4 -7 14 -2.9638 0.0100
-4 -7 15 0.7219 -0.0116
-4 -6 1 -3.3265 0.2539
-4 -6 2 -0.3685 -0.2054
-4 -6 3 -1.0862 -0.2492
-4 -6 4 -3.5516 -0.0362
-4 -6 5 -3.8041 0.0303
-4 -6 6 0.1573 -0.0198
-4 -6 7 3.8117 -0.0024
-4 -6 8 2.2242 0.0495
-4 -6 9 -2.0061 0.0314
-4 -6 10 -2.9260 -0.0033
-4 -6 11 -0.4927 0.0214
-4 -6 12 0.2256 0.0440
-4 -6 13 0.5709 0.0079
-4 -6 14 3.6059 -0.0382
-4 -6 15 2.1290 -0.0456
-4 -6 16 -5.0172 -0.0262
-4 -5 1 0.0028 -0.2977
-4 -5 2 3.4403 -0.3712
-4 -5 3 0.5806 -0.0185
-4 -5 4 -4.7850 0.1378
-4 -5 5 -5.7018 0.0390
-4 -5 6 -1.2734 -0.0053
-4 -5 7 0.8834 0.0544
-4 -5 8 -1.5045 0.0600
-4 -5 9 -2.0495 -0.0028
-4 -5 10 1.8768 -0.0215
-4 -5 11 4.6005 0.0009
-4 -5 12 2.3880 -0.0029
-4 -5 13 0.7474 -0.0092
-4 -5 14 1.8932 0.0087
-4 -5 15 0.4015 0.0078
-4 -5 16 -0.9746 -0.0235
-4 -4 1 10.0534 -0.4278
-4 -4 2 11.2449 0.0352
-4 -4 3 5.5082 0.2666
-4 -4 4 0.6268 0.0929
-4 -4 5 1.1698 -0.0278
-4 -4 6 4.0104 0.0347
-4 -4 7 3.5363 0.0613
-4 -4 8 0.5485 -0.0136
-4 -4 9 -1.4490 -0.0576
-4 -4 10 -1.5495 -0.0300
-4 -4 11 -1.5077 -0.0137
-4 -4 12 -2.1199 -0.0169
-4 -4 13 -1.0682 -0.0014
-4 -4 14 -0.3321 0.0068
-4 -4 15 -2.8475 -0.0088
-4 -4 16 -3.0646 -0.0095
-4 -3 1 -0.6893 0.0718
-4 -3 2 -3.4967 0.3908
-4 -3 3 -7.7955 0.1578
-4 -3 4 -7.9788 -0.0775
-4 -3 5 -2.6580 -0.0393
-4 -3 6 2.8410 0.0115
-4 -3 7 2.9420 -0.0422
-4 -3 8 -0.1218 -0.0681
-4 -3 9 -0.7587 -0.0246
-4 -3 10 1.4664 -0.0007
-4 -3 11 1.3704 -0.0057
-4 -3 12 -0.7122 0.0182
-4 -3 13 0.5473 0.0368
-4 -3 14 1.0780 0.0068
-4 -3 15 -2.9948 -0.0319
-4 -3 16 -4.5430 -0.0366
-4 -3 17 -2.3792 0.0108
-4 -2 1 6.8722 0.4482
-4 -2 2 1.5582 0.1567
-4 -2 3 -3.7596 -0.1960
-4 -2 4 -3.3473 -0.1434
-4 -2 5 1.1439 -0.0010
-4 -2 6 2.5549 -0.0265
-4 -2 7 -0.7969 -0.0640
-4 -2 8 -3.1050 -0.0125
-4 -2 9 -1.2357 0.0266
-4 -2 10 0.7811 0.0092
-4 -2 11 -0.6854 0.0100
-4 -2 12 -1.2908 0.0346
-4 -2 13 0.9589 0.0238
-4 -2 14 0.6186 -0.0009
-4 -2 15 0.3495 -0.0124
-4 -2 16 4.6360 -0.0202
-4 -2 17 5.8439 0.0019
-4 -1 1 15.0980 0.1683
-4 -1 2 7.7345 -0.2709
-4 -1 3 1.6352 -0.2394
-4 -1 4 1.1869 -0.0025
-4 -1 5 3.2531 0.0233
-4 -1 6 3.2611 -0.0328
-4 -1 7 0.0497 0.0191
-4 -1 8 -3.2521 0.0745
-4 -1 9 -3.0295 0.0374
-4 -1 10 -1.2181 -0.0049
-4 -1 11 -1.1800 0.0089
-4 -1 12 -0.0596 0.0131
-4 -1 13 2.0471 -0.0155
-4 -1 14 0.3175 -0.0280
-4 -1 15 -2.7704 -0.0305
-4 -1 16 -3.5986 -0.0214
-4 -1 17 -2.6181 0.0178
-4 0 1 -7.8679 -0.3386
-4 0 2 -16.6627 -0.3243
-4 0 3 -12.9580 0.0390
-4 0 4 -3.7907 0.1513
-4 0 5 4.0562 0.0294
-4 0 6 5.3097 0.0017
-4 0 7 0.8045 0.0597
-4 0 8 0.2586 0.0404
-4 0 9 5.6744 -0.0206
-4 0 10 5.0831 -0.0265
-4 0 11 -2.1708 -0.0135
-4 0 12 -2.6319 -0.0250
-4 0 13 1.7215 -0.0169
-4 0 14 0.4000 0.0102
-4 0 15 -2.0585 0.0042
-4 0 16 -0.1371 -0.0108
-4 0 17 1.8414 -0.0029
-4 1 1 1.2180 -0.3954
-4 1 2 -0.3784 0.0578
-4 1 3 -0.1485 0.2499
-4 1 4 1.0202 0.0793
-4 1 5 1.8445 -0.0237
-4 1 6 -3.3273 0.0383
-4 1 7 -9.2199 0.0422
-4 1 8 -5.8922 -0.0390
-4 1 9 -1.3338 -0.0571
-4 1 10 -4.8364 -0.0200
-4 1 11 -4.3624 -0.0173
-4 1 12 4.0354 -0.0143
-4 1 13 3.3699 0.0209
-4 1 14 -4.5915 0.0262
-4 1 16 5.2657 -0.0144
-4 1 17 5.6820 0.0159
-4 1 18 1.1101 0.0420
-4 2 1 0.6128 0.1139
-4 2 2 2.2059 0.3727
-4 2 3 5.7400 0.1396
-4 2 4 9.7592 -0.0734
-4 2 5 8.3007 -0.0306
-4 2 6 0.9150 0.0232
-4 2 7 -1.1198 -0.0407
-4 2 8 3.7623 -0.0694
-4 2 9 3.0178 -0.0091
-4 2 10 -1.4490 0.0101
-4 2 11 1.7996 -0.0080
-4 2 12 4.3856 0.0252
-4 2 13 -0.8074 0.0482
-4 2 14 0.3051 0.0090
-4 2 15 7.4333 -0.0218
-4 2 16 4.2295 -0.0079
-4 2 18 -5.1444 0.0300
-4 3 1 -9.4770 0.4552
-4 3 2 -11.0255 0.1627
-4 3 3 -8.0500 -0.1564
-4 3 4 -4.1485 -0.1175
-4 3 5 -4.5746 0.0043
-4 3 6 -6.8036 -0.0256
-4 3 7 -2.9286 -0.0757
-4 3 8 3.6006 -0.0055
-4 3 9 4.0629 0.0578
-4 3 10 2.2725 0.0134
-4 3 11 2.0991 -0.0039
-4 3 12 -1.2788 0.0367
-4 3 13 -3.1568 0.0245
-4 3 14 1.0833 -0.0044
-4 3 15 -0.2397 0.0064
-4 3 16 -7.3914 0.0128
-4 4 1 4.4880 0.1559
-4 4 2 4.1887 -0.2616
-4 4 3 4.8169 -0.2238
-4 4 4 3.1466 -0.0039
-4 4 5 -1.3325 0.0297
-4 4 6 -3.1487 -0.0423
-4 4 7 0.8200 -0.0235
-4 4 8 2.7682 0.0546
-4 4 9 -1.9108 0.0356
-4 4 10 -5.2429 -0.0217
-4 4 11 -3.9999 0.0097
-4 4 12 -2.2307 0.0239
-4 4 13 1.1966 -0.0224
-4 4 14 3.7760 -0.0154
-4 4 15 0.8048 0.0070
-4 4 16 -0.0042 -0.0110
-4 4 17 3.8264 -0.0085
-4 5 1 -4.4235 -0.3588
-4 5 2 -0.2611 -0.3139
-4 5 3 3.6838 0.0285
-4 5 4 4.1240 0.1260
-4 5 5 1.9054 0.0303
-4 5 6 1.2094 0.0007
-4 5 7 2.4884 0.0600
-4 5 8 0.9645 0.0690
-4 5 9 -2.0752 -0.0082
-4 5 10 -0.9906 -0.0292
-4 5 11 2.0237 0.0075
-4 5 12 3.7276 -0.0164
-4 5 13 4.6258 -0.0268
-4 5 14 1.2809 0.0097
-4 5 15 -4.4870 -0.0147
-4 5 16 -3.9592 -0.0411
-4 5 17 -0.6052 -0.0023
-4 5 18 -1.1324 0.0115
-4 6 1 -4.4915 -0.3408
-4 6 2 -4.1319 0.0723
-4 6 3 -4.2800 0.2220
-4 6 4 -5.7656 0.0728
-4 6 5 -4.9405 -0.0104
-4 6 6 -1.1529 0.0205
-4 6 7 1.9970 0.0359
-4 6 8 2.5154 -0.0080
-4 6 9 2.8497 -0.0408
-4 6 10 3.2530 -0.0140
-4 6 11 1.9845 -0.0157
-4 6 12 1.3306 -0.0397
-4 6 13 0.8788 0.0040
-4 6 14 -2.7507 0.0244
-4 6 15 -4.8583 -0.0140
-4 6 16 -2.2848 0.0036
-4 6 17 -1.6197 0.0343
-4 7 1 4.3822 0.1256
-4 7 2 6.0860 0.3407
-4 7 3 2.7261 0.1073
-4 7 4 0.6714 -0.0682
-4 7 5 1.2989 -0.0307
-4 7 6 0.3061 -0.0066
-4 7 7 -2.0523 -0.0527
-4 7 8 -2.7754 -0.0757
-4 7 9 -2.7303 -0.0350
-4 7 10 -3.4653 0.0007
-4 7 11 -2.6674 -0.0151
-4 7 12 -1.0088 0.0039
-4 7 13 -3.4153 0.0505
-4 7 14 -6.0192 0.0308
-4 7 15 -0.8575 0.0159
-4 7 16 6.3267 0.0369
-4 7 17 6.7537 0.0127
-4 8 1 0.4053 0.3925
-4 8 2 -1.6110 0.1190
-4 8 3 -2.2310 -0.1600
-4 8 4 0.9749 -0.1009
-4 8 5 2.9933 0.0053
-4 8 6 2.1634 -0.0223
-4 8 7 2.3787 -0.0481
-4 8 8 3.4455 0.0010
-4 8 9 2.3240 0.0429
-4 8 10 0.9090 0.0160
-4 8 11 1.7102 -0.0008
-4 8 12 1.2115 0.0449
-4 8 13 -1.3163 0.0411
-4 8 14 -0.3155 -0.0141
-4 8 15 2.2110 -0.0060
-4 8 16 -0.5891 0.0111
-4 8 17 -4.3921 0.0022
-4 9 1 -2.4260 0.1204
-4 9 2 -4.0453 -0.2628
-4 9 3 -3.8377 -0.2123
-4 9 4 -1.8848 0.0127
-4 9 5 -1.1896 0.0434
-4 9 6 -1.8833 -0.0244
-4 9 7 -1.9480 0.0001
-4 9 8 -1.0265 0.0715
-4 9 9 -0.1637 0.0595
-4 9 10 0.7047 -0.0050
-4 9 11 0.8961 0.0008
-4 9 12 -1.1871 0.0319
-4 9 13 -2.2045 -0.0066
-4 9 14 0.9822 -0.0269
-4 9 15 3.2471 -0.0112
-4 9 16 1.7071 -0.0521
-4 10 1 2.0587 -0.2927
-4 10 2 0.1481 -0.2838
-4 10 3 1.0149 0.0210
-4 10 4 3.8781 0.1321
-4 10 5 3.4417 0.0431
-4 10 6 -0.4449 0.0016
-4 10 7 -1.9275 0.0494
-4 10 8 0.2437 0.0514
-4 10 9 0.8651 -0.0197
-4 10 10 -0.7736 -0.0364
-4 10 11 -1.8996 0.0113
-4 10 12 -2.4900 -0.0083
-4 10 13 -1.2296 -0.0547
-4 10 14 1.4223 -0.0052
-4 10 15 0.8190 0.0353
-4 10 16 -1.5745 0.0032
-4 11 1 -5.0632 -0.3119
-4 11 2 -4.0974 0.0707
-4 11 3 -0.2514 0.2342
-4 11 4 1.2337 0.0882
-4 11 5 -1.0177 -0.0334
-4 11 6 -2.7123 -0.0080
-4 11 7 -0.1950 0.0300
-4 11 8 2.7997 -0.0174
-4 11 9 1.9542 -0.0591
-4 11 10 0.3585 -0.0226
-4 11 11 -0.4742 -0.0002
-4 11 12 -1.8540 -0.0252
-4 11 13 -0.6617 -0.0062
-4 11 14 2.1666 0.0228
-4 11 15 1.5335 -0.0316
-4 12 1 -0.6641 0.0878
-4 12 2 1.8093 0.2803
-4 12 3 1.9775 0.0968
-4 12 4 -0.0510 -0.0505
-4 12 5 -2.5369 -0.0141
-4 12 6 -3.2442 0.0212
-4 12 7 0.2859 -0.0305
-4 12 8 3.8643 -0.0635
-4 12 9 2.3474 -0.0097
-4 12 10 -0.8602 0.0168
-4 12 11 -1.8334 -0.0266
-4 12 12 -0.1670 -0.0199
-4 12 13 2.9406 0.0413
-4 12 14 2.3493 0.0411
-4 12 15 -2.1560 -0.0123
-4 13 1 0.3270 0.3517
-4 13 2 0.7762 0.1194
-4 13 3 -0.5873 -0.1446
-4 13 4 -0.5664 -0.1150
-4 13 5 0.6778 -0.0133
-4 13 6 1.8202 -0.0157
-4 13 7 3.0412 -0.0421
-4 13 8 1.0656 0.0061
-4 13 9 -2.8600 0.0495
-4 13 10 -2.5347 0.0053
-4 13 11 -0.3625 -0.0079
-4 13 12 -0.4655 0.0351
-4 13 13 0.0101 0.0085
-4 13 14 1.7098 -0.0423
-4 14 1 -0.2277 0.1265
-4 14 2 -1.9385 -0.2112
-4 14 3 -2.9496 -0.1786
-4 14 4 -0.2555 0.0188
-4 14 5 1.2235 0.0450
-4 14 6 0.0553 -0.0266
-4 14 7 0.5408 -0.0096
-4 14 8 1.4039 0.0719
-4 14 9 1.2674 0.0394
-4 14 10 1.0973 -0.0512
-4 14 11 -0.2151 -0.0133
-4 14 12 -0.1687 0.0357
-4 14 13 2.2500 -0.0099
-4 15 1 3.8448 -0.2588
-4 15 2 3.0444 -0.2588
-4 15 3 1.6527 0.0138
-4 15 4 1.6967 0.0975
-4 15 5 -0.9929 0.0200
-4 15 6 -2.7585 0.0016
-4 15 7 0.2710 0.0558
-4 15 8 2.2816 0.0542
-4 15 9 1.0534 -0.0404
-4 15 10 -0.5713 -0.0459
-4 15 11 -1.7841 0.0321
-4 15 12 -0.9579 -0.0139
-4 16 1 -0.8943 -0.2520
-4 16 2 -5.1623 0.0575
-4 16 3 -3.2200 0.1810
-4 16 4 2.4197 0.0731
-4 16 5 3.5717 0.0155
-4 16 6 2.8234 0.0277
-4 16 7 2.5772 0.0360
-4 16 8 0.0479 -0.0014
-4 16 9 -2.4760 -0.0511
-4 16 10 -2.4168 -0.0104
-4 17 1 -0.4932 0.0860
-4 17 2 -1.2429 0.2521
-4 17 3 1.2351 0.0578
-4 17 4 1.3687 -0.0723
-4 17 5 -2.2720 -0.0119
-4 17 6 -2.7602 0.0229
-4 17 7 -0.2998 -0.0055
-4 17 8 0.4806 -0.0455
-4 18 1 1.0803 0.2768
-4 18 2 0.4855 0.0826
-4 18 3 2.3682 -0.1390
-4 18 4 2.0948 -0.0356
-4 18 5 -0.5374 0.0350
-3 -18 1 -3.2589 -0.1949
-3 -18 2 -1.3762 -0.0912
-3 -18 3 0.2884 0.0087
-3 -17 1 1.5245 -0.1188
-3 -17 2 -1.2830 0.1151
-3 -17 3 -3.0792 0.0897
-3 -17 4 -2.7481 0.0147
-3 -17 5 -1.5405 0.0379
-3 -16 1 0.5143 0.2066
-3 -16 2 1.8589 0.1950
-3 -16 3 2.0913 -0.0185
-3 -16 4 2.5811 -0.0591
-3 -16 5 2.4388 -0.0118
-3 -16 6 1.4000 -0.0291
-3 -16 7 0.5698 -0.0241
-3 -15 1 -3.4426 0.2737
-3 -15 2 -4.4762 -0.0148
-3 -15 3 -1.8411 -0.1418
-3 -15 4 1.8708 -0.0514
-3 -15 5 1.3277 -0.0060
-3 -15 6 -1.3814 -0.0275
-3 -15 7 -1.9009 -0.0161
-3 -15 8 0.1212 -0.0133
-3 -14 1 -1.2355 -0.0136
-3 -14 2 1.1109 -0.2315
-3 -14 3 2.9731 -0.1088
-3 -14 4 0.9492 0.0286
-3 -14 5 -2.3533 0.0201
-3 -14 6 -1.2077 -0.0022
-3 -14 7 1.9911 0.0297
-3 -14 8 2.3593 0.0432
-3 -14 9 -0.3414 0.0125
-3 -14 10 -3.9795 -0.0202
-3 -13 1 4.8608 -0.3205
-3 -13 2 5.8596 -0.1453
-3 -13 3 4.7201 0.0897
-3 -13 4 1.3281 0.0911
-3 -13 5 -0.4974 0.0087
-3 -13 6 0.6634 0.0039
-3 -13 7 0.7089 0.0405
-3 -13 8 -0.0055 0.0302
-3 -13 9 1.2497 -0.0131
-3 -13 10 2.8251 -0.0202
-3 -13 11 2.4624 0.0242
-3 -12 1 -2.5521 -0.1745
-3 -12 2 -2.5855 0.1624
-3 -12 3 -3.1226 0.1740
-3 -12 4 -4.5758 0.0205
-3 -12 5 -1.9835 -0.0352
-3 -12 6 2.0850 0.0004
-3 -12 7 2.0284 0.0184
-3 -12 8 1.2860 -0.0180
-3 -12 9 1.9425 -0.0447
-3 -12 10 0.3269 -0.0178
-3 -12 11 -2.4863 0.0221
-3 -12 12 -2.4739 0.0287
-3 -11 1 4.8268 0.2364
-3 -11 2 4.6473 0.2696
-3 -11 3 -0.0117 0.0205
-3 -11 4 -2.2975 -0.0896
-3 -11 5 0.5091 -0.0422
-3 -11 6 0.7500 -0.0028
-3 -11 7 -2.2139 -0.0164
-3 -11 8 -2.0640 -0.0358
-3 -11 9 -1.6447 -0.0206
-3 -11 10 -4.0231 0.0068
-3 -11 11 -3.9624 0.0229
-3 -11 12 -0.8969 0.0341
-3 -11 13 0.2003 0.0206
-3 -10 1 1.4758 0.3395
-3 -10 2 -1.6365 0.0050
-3 -10 3 -3.2250 -0.1662
-3 -10 4 0.2472 -0.0775
-3 -10 5 4.1161 -0.0056
-3 -10 6 2.5235 -0.0107
-3 -10 7 0.1774 -0.0085
-3 -10 8 1.0872 0.0136
-3 -10 9 1.3228 0.0265
-3 -10 10 0.8623 0.0242
-3 -10 11 1.5556 0.0252
-3 -10 12 0.3245 0.0235
-3 -10 13 -2.2975 -0.0005
-3 -10 14 -1.9256 -0.0209
-3 -9 1 0.1899 -0.0349
-3 -9 2 -4.5175 -0.2717
-3 -9 3 -6.0422 -0.1279
-3 -9 4 -2.4413 0.0246
-3 -9 5 0.2977 0.0229
-3 -9 6 -1.3067 0.0109
-3 -9 7 -1.8580 0.0325
-3 -9 8 -0.1789 0.0337
-3 -9 9 -0.3094 0.0137
-3 -9 10 -1.2846 0.0000
-3 -9 11 -1.2007 -0.0025
-3 -9 12 -0.7091 -0.0086
-3 -9 13 0.6188 -0.0305
-3 -9 14 2.2315 -0.0480
-3 -8 1 1.3630 -0.3736
-3 -8 2 0.2084 -0.1792
-3 -8 3 3.2201 0.0885
-3 -8 4 6.9336 0.0923
-3 -8 5 4.5836 0.0121
-3 -8 6 -0.9749 0.0096
-3 -8 7 -2.2364 0.0227
-3 -8 8 -0.6184 0.0019
-3 -8 9 0.2175 -0.0201
-3 -8 10 1.2431 -0.0215
-3 -8 11 1.6267 -0.0123
-3 -8 12 0.0094 -0.0098
-3 -8 13 -1.5531 -0.0191
-3 -8 14 -1.2225 -0.0088
-3 -8 15 0.3587 0.0242
-3 -7 1 -5.3258 -0.2008
-3 -7 2 -7.1950 0.1777
-3 -7 3 -3.0750 0.1991
-3 -7 4 1.6500 0.0338
-3 -7 5 1.4867 -0.0187
-3 -7 6 -0.3505 0.0108
-3 -7 7 0.2116 0.0030
-3 -7 8 1.1661 -0.0313
-3 -7 9 1.0002 -0.0343
-3 -7 10 -0.1337 -0.0119
-3 -7 11 -2.1215 0.0019
-3 -7 12 -2.3783 0.0018
-3 -7 13 -0.0453 0.0010
-3 -7 14 1.9734 0.0115
-3 -7 15 1.8568 0.0078
-3 -7 16 0.0282 -0.0318
-3 -6 1 -4.5444 0.2609
-3 -6 2 -2.8780 0.3049
-3 -6 3 2.8043 0.0387
-3 -6 4 2.9415 -0.0850
-3 -6 5 -2.8849 -0.0384
-3 -6 6 -6.4921 -0.0076
-3 -6 7 -4.1795 -0.0356
-3 -6 8 0.3378 -0.0428
-3 -6 9 3.3222 -0.0045
-3 -6 10 3.2658 0.0157
-3 -6 11 1.6653 0.0003
-3 -6 12 0.5992 -0.0071
-3 -6 13 -0.7072 0.0059
-3 -6 14 -0.8729 0.0204
-3 -6 15 1.6868 0.0167
-3 -6 16 3.0556 0.0028
-3 -5 1 1.1165 0.3512
-3 -5 2 6.1786 0.0137
-3 -5 3 10.0490 -0.1804
-3 -5 4 7.1849 -0.1016
-3 -5 5 0.7977 -0.0130
-3 -5 6 -1.3513 -0.0160
-3 -5 7 2.0871 -0.0285
-3 -5 8 4.4712 0.0121
-3 -5 9 1.1264 0.0501
-3 -5 10 -4.4129 0.0312
-3 -5 11 -5.4352 0.0099
-3 -5 12 -2.5100 0.0177
-3 -5 13 -0.0416 0.0124
-3 -5 14 2.4020 -0.0105
-3 -5 15 2.8164 -0.0147
-3 -5 16 -1.5020 0.0030
-3 -5 17 -3.6190 0.0071
-3 -4 1 -16.0512 -0.0026
-3 -4 2 -6.7848 -0.3023
-3 -4 3 -0.8126 -0.1625
-3 -4 4 -2.8213 0.0311
-3 -4 5 -5.8761 0.0454
-3 -4 6 -2.5793 0.0030
-3 -4 7 2.5558 0.0196
-3 -4 8 2.2257 0.0596
-3 -4 9 -0.7155 0.0406
-3 -4 10 -0.1309 -0.0064
-3 -4 11 2.2955 -0.0093
-3 -4 12 1.3354 0.0015
-3 -4 13 -0.0451 -0.0070
-3 -4 14 2.2668 -0.0014
-3 -4 15 2.2191 0.0207
-3 -4 16 -1.6060 0.0090
-3 -4 17 -1.8979 -0.0375
-3 -3 1 -2.7228 -0.3835
-3 -3 2 8.8313 -0.1998
-3 -3 3 8.1017 0.1102
-3 -3 4 -0.6751 0.1214
-3 -3 5 -5.6726 0.0216
-3 -3 6 -2.8181 0.0216
-3 -3 7 0.8092 0.0555
-3 -3 8 0.8394 0.0252
-3 -3 9 0.0431 -0.0320
-3 -3 10 0.5758 -0.0331
-3 -3 11 1.3282 -0.0079
-3 -3 12 1.2596 -0.0183
-3 -3 13 1.6014 -0.0285
-3 -3 14 0.9200 -0.0017
-3 -3 15 -2.5575 0.0242
-3 -3 16 -2.8603 0.0072
-3 -3 17 1.5259 -0.0183
-3 -2 1 17.9143 -0.2289
-3 -2 2 20.2790 0.2194
-3 -2 3 9.6159 0.2515
-3 -2 4 -1.8924 0.0321
-3 -2 5 -4.3049 -0.0302
-3 -2 6 0.8149 0.0177
-3 -2 7 3.7411 -0.0009
-3 -2 8 1.3006 -0.0517
-3 -2 9 -1.5433 -0.0417
-3 -2 10 -1.5100 -0.0033
-3 -2 11 -1.3214 -0.0060
-3 -2 12 -2.6160 -0.0146
-3 -2 13 -1.8191 0.0141
-3 -2 14 0.3432 0.0383
-3 -2 15 0.1530 0.0269
-3 -2 16 -0.4799 -0.0030
-3 -2 17 -1.0889 -0.0076
-3 -2 18 -2.0520 0.0339
-3 -1 1 -7.9000 0.2965
-3 -1 2 -7.2522 0.3189
-3 -1 3 -9.9211 -0.0202
-3 -1 4 -9.1681 -0.1389
-3 -1 5 -1.0687 -0.0270
-3 -1 6 7.0249 -0.0029
-3 -1 7 6.7549 -0.0669
-3 -1 8 2.1305 -0.0523
-3 -1 9 0.6220 0.0179
-3 -1 10 1.3196 0.0291
-3 -1 11 -0.2151 0.0005
-3 -1 12 -2.1291 0.0068
-3 -1 13 -1.6510 0.0223
-3 -1 14 -1.8934 0.0114
-3 -1 15 -1.8931 0.0001
-3 -1 16 1.0529 -0.0134
-3 -1 17 1.5778 -0.0256
-3 0 1 14.6525 0.3581
-3 0 2 10.8962 -0.0623
-3 0 3 -2.2070 -0.2540
-3 0 4 -9.1696 -0.0920
-3 0 5 -6.4296 0.0235
-3 0 6 -3.2178 -0.0211
-3 0 7 -4.0741 -0.0279
-3 0 8 -4.9890 0.0363
-3 0 9 -3.1775 0.0451
-3 0 10 -0.0329 0.0035
-3 0 11 2.1192 0.0020
-3 0 12 2.4709 0.0195
-3 0 13 0.9029 -0.0036
-3 0 14 -0.1525 -0.0290
-3 0 15 2.4834 -0.0227
-3 0 16 3.0819 -0.0230
-3 0 17 -1.6259 -0.0221
-3 0 18 -1.4704 0.0052
-3 1 1 22.2123 -0.1023
-3 1 2 10.6455 -0.3406
-3 1 3 2.6694 -0.1151
-3 1 4 5.3874 0.0888
-3 1 5 10.3889 0.0449
-3 1 6 10.4757 -0.0164
-3 1 7 5.8041 0.0389
-3 1 8 0.5925 0.0731
-3 1 9 -0.6811 0.0221
-3 1 10 0.0151 -0.0119
-3 1 11 -2.8849 -0.0054
-3 1 12 -6.5947 -0.0174
-3 1 13 -3.8842 -0.0317
-3 1 14 4.3289 -0.0088
-3 1 15 7.6127 0.0169
-3 1 16 -0.3465 0.0065
-3 1 17 -6.7851 -0.0069
-3 1 18 -0.5468 0.0035
-3 2 1 -13.7515 -0.4196
-3 2 2 -23.0873 -0.1452
-3 2 3 -21.4424 0.1420
-3 2 4 -12.9770 0.1094
-3 2 5 -3.7694 -0.0005
-3 2 6 0.9290 0.0191
-3 2 7 -1.0966 0.0541
-3 2 8 -2.6015 -0.0072
-3 2 9 1.6461 -0.0520
-3 2 10 3.4067 -0.0163
-3 2 11 -1.0105 -0.0030
-3 2 12 -2.3791 -0.0278
-3 2 13 1.3341 -0.0209
-3 2 14 2.1306 0.0111
-3 2 15 -3.0129 0.0274
-3 2 16 -6.8577 0.0152
-3 2 17 -0.4757 0.0037
-3 3 1 14.7658 -0.1817
-3 3 2 9.5590 0.2390
-3 3 3 7.3561 0.2125
-3 3 4 7.1294 0.0127
-3 3 5 6.0573 -0.0137
-3 3 6 0.4549 0.0538
-3 3 7 -6.5517 0.0182
-3 3 8 -6.4107 -0.0662
-3 3 9 -2.1201 -0.0467
-3 3 10 -2.0467 0.0027
-3 3 11 -1.3536 -0.0105
-3 3 12 4.0645 -0.0078
-3 3 13 6.6693 0.0217
-3 3 14 4.4398 0.0231
-3 3 15 1.6813 0.0090
-3 4 1 -6.7966 0.3554
-3 4 2 -7.5977 0.3067
-3 4 3 -2.2625 -0.0207
-3 4 4 4.0524 -0.1034
-3 4 5 5.8722 -0.0035
-3 4 6 1.7555 0.0083
-3 4 7 -1.3268 -0.0741
-3 4 8 1.7825 -0.0615
-3 4 9 4.2222 0.0381
-3 4 10 1.9859 0.0395
-3 4 11 -0.0097 -0.0112
-3 4 12 -1.7397 0.0080
-3 4 13 -3.2634 0.0225
-3 4 14 -1.1102 0.0049
-3 4 15 -0.2211 -0.0002
-3 4 16 -2.7590 -0.0117
-3 5 1 -5.3199 0.3945
-3 5 2 -6.5331 -0.0560
-3 5 3 -4.6091 -0.2225
-3 5 4 -3.6920 -0.0753
-3 5 5 -4.2983 0.0113
-3 5 6 -4.5513 -0.0378
-3 5 7 -1.4710 -0.0608
-3 5 8 2.9732 0.0192
-3 5 9 3.6517 0.0593
-3 5 10 2.3746 0.0047
-3 5 11 1.7678 0.0077
-3 5 12 0.4072 0.0426
-3 5 13 1.0597 0.0031
-3 5 14 2.9209 -0.0164
-3 5 15 -0.4207 0.0094
-3 5 16 -3.4415 0.0077
-3 5 17 0.0295 0.0057
-3 5 18 1.2906 0.0035
-3 6 1 4.0405 -0.1419
-3 6 2 5.2017 -0.3525
-3 6 3 4.8448 -0.1101
-3 6 4 2.8908 0.0623
-3 6 5 0.4724 0.0246
-3 6 6 -1.6413 -0.0177
-3 6 7 -2.0386 0.0276
-3 6 8 -2.1596 0.0743
-3 6 9 -3.3569 0.0230
-3 6 10 -3.5254 -0.0260
-3 6 11 -3.1864 0.0055
-3 6 12 -2.4690 -0.0085
-3 6 13 0.7686 -0.0488
-3 6 14 1.5723 -0.0145
-3 6 15 -2.2399 0.0012
-3 6 16 -1.5328 -0.0249
-3 6 17 3.3292 -0.0152
-3 6 18 2.4379 -0.0024
-3 7 1 -3.8244 -0.4283
-3 7 2 -2.1323 -0.1365
-3 7 3 1.3875 0.1383
-3 7 4 3.2551 0.0940
-3 7 5 3.0907 0.0148
-3 7 6 2.8826 0.0423
-3 7 7 3.1654 0.0735
-3 7 8 2.6222 0.0271
-3 7 9 2.8823 -0.0402
-3 7 10 3.8468 -0.0233
-3 7 11 1.8630 0.0014
-3 7 12 0.1447 -0.0387
-3 7 13 2.0972 -0.0299
-3 7 14 1.6565 0.0072
-3 7 15 -1.7621 -0.0169
-3 7 16 -1.9350 -0.0153
-3 7 17 -1.4625 0.0188
-3 7 18 -3.2122 0.0245
-3 8 1 -3.1301 -0.1117
-3 8 2 -1.1057 0.2597
-3 8 3 -2.2707 0.1830
-3 8 4 -5.2823 -0.0110
-3 8 5 -5.2021 -0.0096
-3 8 6 -2.4897 0.0407
-3 8 7 -1.3268 -0.0040
-3 8 8 -0.9941 -0.0735
-3 8 9 1.2887 -0.0561
-3 8 10 1.5445 0.0011
-3 8 11 -1.3416 -0.0185
-3 8 12 -0.7229 -0.0322
-3 8 13 1.2650 0.0308
-3 8 14 -1.7241 0.0439
-3 8 15 -3.6138 0.0191
-3 8 16 0.1443 0.0326
-3 8 17 2.8464 0.0113
-3 8 18 1.9595 -0.0030
-3 9 1 8.8844 0.3247
-3 9 2 7.7053 0.2713
-3 9 3 3.7161 -0.0354
-3 9 4 1.8702 -0.1029
-3 9 5 2.4846 -0.0103
-3 9 6 1.5169 -0.0109
-3 9 7 -1.1624 -0.0794
-3 9 8 -1.2484 -0.0713
-3 9 9 0.0775 0.0099
-3 9 10 -2.3506 0.0341
-3 9 11 -4.5361 0.0078
-3 9 12 -1.7398 0.0395
-3 9 13 0.0167 0.0493
-3 9 14 -0.9631 -0.0155
-3 9 15 0.6576 -0.0105
-3 9 16 2.4145 0.0238
-3 9 17 0.8313 -0.0137
-3 10 1 -4.0063 0.3005
-3 10 2 -3.9391 -0.0907
-3 10 3 -2.8488 -0.2174
-3 10 4 -1.2452 -0.0654
-3 10 5 0.1866 0.0211
-3 10 6 1.0732 -0.0255
-3 10 7 1.1957 -0.0445
-3 10 8 1.3927 0.0287
-3 10 9 0.7968 0.0721
-3 10 10 -0.6627 0.0188
-3 10 11 0.8713 -0.0028
-3 10 12 3.3648 0.0397
-3 10 13 1.3073 0.0142
-3 10 14 -1.4955 -0.0293
-3 10 15 -1.1861 -0.0031
-3 10 16 -0.8343 -0.0219
-3 10 17 -0.6593 -0.0369
-3 11 1 3.6223 -0.1226
-3 11 2 1.2173 -0.2988
-3 11 3 -1.6356 -0.1057
-3 11 4 -2.4755 0.0544
-3 11 5 -1.0763 0.0450
-3 11 6 -0.6291 0.0011
-3 11 7 -2.2557 0.0266
-3 11 8 -1.8425 0.0734
-3 11 9 0.3372 0.0438
-3 11 10 1.0114 -0.0065
-3 11 11 1.0732 0.0066
-3 11 12 0.0388 -0.0048
-3 11 13 -1.6916 -0.0671
-3 11 14 -0.0069 -0.0361
-3 11 15 2.9823 0.0381
-3 11 16 2.7881 -0.0012
-3 12 1 -0.2123 -0.3375
-3 12 2 -1.2034 -0.0741
-3 12 3 -0.0722 0.1448
-3 12 4 1.1073 0.0967
-3 12 5 2.3342 0.0022
-3 12 6 1.6251 0.0004
-3 12 7 -1.0249 0.0480
-3 12 8 -1.6610 0.0322
-3 12 9 -0.9679 -0.0361
-3 12 10 -0.4716 -0.0364
-3 12 11 0.4984 0.0034
-3 12 12 -0.2389 -0.0150
-3 12 13 -1.4963 -0.0335
-3 12 14 0.0922 0.0067
-3 12 15 1.1176 0.0051
-3 12 16 -0.3698 -0.0371
-3 13 1 -2.9600 -0.0792
-3 13 2 -2.0214 0.2099
-3 13 3 -0.7760 0.1421
-3 13 4 -0.9582 -0.0066
-3 13 5 -0.7734 -0.0228
-3 13 6 -2.2047 0.0107
-3 13 7 -3.0304 -0.0044
-3 13 8 0.5336 -0.0572
-3 13 9 3.2499 -0.0449
-3 13 10 1.5157 0.0061
-3 13 11 -1.2269 -0.0097
-3 13 12 -2.4217 -0.0258
-3 13 13 -0.7056 0.0301
-3 13 14 1.7940 0.0689
-3 13 15 0.8877 0.0161
-3 14 1 -0.7605 0.2841
-3 14 2 2.4085 0.2173
-3 14 3 1.2530 -0.0438
-3 14 4 -1.5158 -0.1084
-3 14 5 -0.9272 -0.0295
-3 14 6 -0.1703 0.0134
-3 14 7 0.3977 -0.0276
-3 14 8 1.6948 -0.0447
-3 14 9 1.1573 0.0271
-3 14 10 0.7259 0.0467
-3 14 11 1.8653 -0.0031
-3 14 12 1.4321 -0.0057
-3 14 13 0.6345 -0.0056
-3 14 14 1.6458 -0.0273
-3 15 1 -1.5082 0.2405
-3 15 2 -0.6384 -0.0749
-3 15 3 -2.4536 -0.1824
-3 15 4 -0.9248 -0.0550
-3 15 5 3.4368 0.0301
-3 15 6 2.9473 -0.0030
-3 15 7 -0.0447 -0.0444
-3 15 8 -1.1593 0.0238
-3 15 9 -1.5316 0.0783
-3 15 10 -0.9817 -0.0034
-3 15 11 -0.3524 -0.0223
-3 15 12 -0.5869 0.0581
-3 15 13 0.8089 0.0425
-3 16 1 0.2615 -0.1150
-3 16 2 2.7848 -0.2439
-3 16 3 0.0808 -0.0674
-3 16 4 -0.7801 0.0482
-3 16 5 -0.6777 0.0230
-3 16 6 -2.7117 -0.0127
-3 16 7 -2.2752 0.0064
-3 16 8 1.0296 0.0640
-3 16 9 3.2018 0.0364
-3 16 10 3.4780 -0.0256
-3 16 11 1.2726 0.0066
-3 17 1 3.5139 -0.2779
-3 17 2 2.2226 -0.0669
-3 17 3 -0.9861 0.1033
-3 17 4 1.1323 0.0603
-3 17 5 3.2519 0.0142
-3 17 6 1.4444 0.0051
-3 17 7 0.2169 0.0111
-3 17 8 0.5973 0.0225
-3 17 9 0.7640 -0.0247
-3 17 10 0.4563 -0.0282
-3 18 1 2.0098 -0.0647
-3 18 2 -1.9610 0.2186
-3 18 3 -3.5144 0.1382
-3 18 4 -0.3586 -0.0311
-3 18 5 0.8793 -0.0176
-3 18 6 -0.0804 0.0331
-3 18 7 -0.1553 0.0256
-2 -18 1 0.9320 0.1500
-2 -18 2 -0.1013 -0.0472
-2 -18 3 -1.4812 -0.0775
-2 -17 1 -1.8697 -0.1288
-2 -17 2 3.3684 -0.1431
-2 -17 3 4.6657 -0.0146
-2 -17 4 2.3253 -0.0037
-2 -17 5 1.7346 -0.0204
-2 -17 6 1.4143 0.0064
-2 -16 1 -1.4875 -0.2516
-2 -16 2 -1.7177 0.0090
-2 -16 3 -4.3205 0.1122
-2 -16 4 -4.4131 0.0224
-2 -16 5 -1.2300 0.0054
-2 -16 6 0.2057 0.0443
-2 -16 7 -0.9946 0.0300
-2 -15 1 1.5396 0.0264
-2 -15 2 1.6373 0.2303
-2 -15 3 -1.2712 0.0899
-2 -15 4 -2.7243 -0.0370
-2 -15 5 -1.1231 -0.0073
-2 -15 6 0.3874 0.0059
-2 -15 7 0.1093 -0.0123
-2 -15 8 -0.7701 0.0146
-2 -15 9 -0.7289 0.0194
-2 -14 1 1.4736 0.3000
-2 -14 2 1.7258 0.1501
-2 -14 3 0.5972 -0.0720
-2 -14 4 3.0834 -0.0761
-2 -14 5 5.0833 -0.0086
-2 -14 6 2.0722 -0.0108
-2 -14 7 -2.3127 -0.0170
-2 -14 8 -2.4463 -0.0099
-2 -14 9 1.8282 -0.0282
-2 -14 10 5.3439 -0.0132
-2 -13 1 -3.7558 0.1755
-2 -13 2 -5.6881 -0.1440
-2 -13 3 -3.5187 -0.1595
-2 -13 4 0.3801 -0.0291
-2 -13 5 0.1325 0.0052
-2 -13 6 -1.9746 -0.0242
-2 -13 7 -1.1018 -0.0181
-2 -13 8 1.7904 0.0024
-2 -13 9 2.9865 0.0090
-2 -13 10 0.9253 0.0142
-2 -13 11 -1.4316 -0.0155
-2 -12 1 2.8196 -0.2208
-2 -12 2 5.3293 -0.2348
-2 -12 3 5.7897 -0.0124
-2 -12 4 2.3739 0.0569
-2 -12 5 -3.0729 0.0136
-2 -12 6 -4.4089 0.0058
-2 -12 7 -1.7699 0.0303
-2 -12 8 0.1140 0.0340
-2 -12 9 0.2552 0.0181
-2 -12 10 0.0747 -0.0048
-2 -12 11 0.2447 -0.0320
-2 -12 12 0.1310 -0.0163
-2 -11 1 0.2348 -0.3201
-2 -11 2 0.6079 0.0302
-2 -11 3 1.3970 0.1646
-2 -11 4 -0.3200 0.0665
-2 -11 5 -1.2163 0.0133
-2 -11 6 1.8702 0.0242
-2 -11 7 3.6676 0.0236
-2 -11 8 2.0478 0.0055
-2 -11 9 1.2510 -0.0084
-2 -11 10 1.2847 -0.0157
-2 -11 11 -0.2273 -0.0208
-2 -11 12 -1.5033 -0.0071
-2 -11 13 -0.9140 0.0269
-2 -10 1 0.0210 0.0316
-2 -10 2 1.8972 0.2726
-2 -10 3 -0.5581 0.1010
-2 -10 4 -5.3950 -0.0407
-2 -10 5 -4.5839 -0.0130
-2 -10 6 -0.0292 0.0084
-2 -10 7 0.8162 -0.0198
-2 -10 8 0.0147 -0.0343
-2 -10 9 0.8256 -0.0179
-2 -10 10 0.2989 -0.0039
-2 -10 11 -0.7088 -0.0049
-2 -10 12 1.0877 0.0134
-2 -10 13 2.3230 0.0517
-2 -10 14 -0.2626 0.0481
-2 -9 1 4.3211 0.3986
-2 -9 2 4.3927 0.1679
-2 -9 3 -0.1419 -0.1177
-2 -9 4 -2.3078 -0.0942
-2 -9 5 1.1310 -0.0115
-2 -9 6 2.6628 -0.0389
-2 -9 7 -0.7759 -0.0599
-2 -9 8 -2.6677 -0.0168
-2 -9 9 -1.7061 0.0206
-2 -9 10 -1.4936 0.0150
-2 -9 11 -1.1297 0.0041
-2 -9 12 -0.0670 0.0184
-2 -9 13 -0.6405 0.0338
-2 -9 14 -1.6956 0.0125
-2 -9 15 -0.5039 -0.0282
-2 -8 1 1.4875 0.2258
-2 -8 2 -0.8591 -0.1968
-2 -8 3 -5.3273 -0.1976
-2 -8 4 -3.7389 -0.0013
-2 -8 5 2.1246 0.0283
-2 -8 6 3.3886 -0.0218
-2 -8 7 1.0091 0.0065
-2 -8 8 1.0534 0.0538
-2 -8 9 1.5859 0.0459
-2 -8 10 0.0617 0.0147
-2 -8 11 -0.5460 -0.0067
-2 -8 12 0.4676 -0.0108
-2 -8 13 0.2677 0.0020
-2 -8 14 -1.4953 0.0003
-2 -8 15 -2.1567 -0.0165
-2 -8 16 -0.6516 -0.0096
-2 -7 1 3.8627 -0.2927
-2 -7 2 -3.0228 -0.3088
-2 -7 3 -6.2807 -0.0059
-2 -7 4 -2.1963 0.0941
-2 -7 5 1.4214 0.0064
-2 -7 6 -1.0244 -0.0070
-2 -7 7 -3.2654 0.0516
-2 -7 8 -1.4245 0.0515
-2 -7 9 0.0224 0.0049
-2 -7 10 0.1199 -0.0225
-2 -7 11 1.4462 -0.0302
-2 -7 12 2.4636 -0.0191
-2 -7 13 0.6813 -0.0049
-2 -7 14 -1.7329 -0.0238
-2 -7 15 -0.9643 -0.0352
-2 -7 16 1.2240 -0.0122
-2 -6 1 7.8953 -0.4104
-2 -6 2 1.4370 -0.0104
-2 -6 3 0.6400 0.1800
-2 -6 4 5.7037 0.0747
-2 -6 5 6.8252 -0.0024
-2 -6 6 2.4015 0.0259
-2 -6 7 -0.2236 0.0298
-2 -6 8 -0.5649 -0.0173
-2 -6 9 -2.0649 -0.0390
-2 -6 10 -2.6387 -0.0315
-2 -6 11 -0.7930 -0.0288
-2 -6 12 0.5835 -0.0108
-2 -6 13 -0.2926 0.0131
-2 -6 14 -1.1054 0.0159
-2 -6 15 0.5661 0.0127
-2 -6 16 2.1040 -0.0105
-2 -6 17 1.4074 -0.0494
-2 -5 1 -9.3768 0.0853
-2 -5 2 -14.5959 0.3214
-2 -5 3 -8.2109 0.1307
-2 -5 4 0.6673 -0.0366
-2 -5 5 1.9953 -0.0239
-2 -5 6 -1.0166 0.0065
-2 -5 7 -2.2187 -0.0222
-2 -5 8 -1.8857 -0.0514
-2 -5 9 0.1408 -0.0369
-2 -5 10 3.8079 -0.0160
-2 -5 11 4.9268 -0.0051
-2 -5 12 1.7825 0.0167
-2 -5 13 -2.4242 0.0259
-2 -5 14 -3.2983 0.0112
-2 -5 15 -0.0878 -0.0037
-2 -5 16 1.8411 -0.0104
-2 -5 17 -0.1030 0.0010
-2 -4 1 -2.6481 0.4183
-2 -4 2 -6.1878 0.1812
-2 -4 3 1.2711 -0.0909
-2 -4 4 5.8973 -0.0836
-2 -4 5 1.2146 -0.0220
-2 -4 6 -5.2220 -0.0327
-2 -4 7 -5.2430 -0.0472
-2 -4 8 -0.0112 -0.0180
-2 -4 9 4.0034 0.0239
-2 -4 10 2.5247 0.0284
-2 -4 11 -0.9072 0.0162
-2 -4 12 -1.2659 0.0200
-2 -4 13 -0.4599 0.0177
-2 -4 14 0.2124 -0.0006
-2 -4 15 1.6842 -0.0194
-2 -4 16 1.1250 -0.0188
-2 -4 17 -0.7313 -0.0048
-2 -4 18 0.4926 -0.0062
-2 -3 1 -0.9616 0.1770
-2 -3 2 0.0599 -0.2183
-2 -3 3 9.2005 -0.2056
-2 -3 4 10.4663 -0.0260
-2 -3 5 2.6449 0.0048
-2 -3 6 -2.6621 -0.0200
-2 -3 7 -0.8677 0.0074
-2 -3 8 1.3546 0.0496
-2 -3 9 -0.3500 0.0487
-2 -3 10 -2.5531 0.0131
-2 -3 11 -1.7970 -0.0005
-2 -3 12 -1.3990 0.0096
-2 -3 13 -2.6246 0.0067
-2 -3 14 0.3039 -0.0086
-2 -3 15 4.7948 -0.0123
-2 -3 16 2.7918 0.0068
-2 -3 17 -1.2145 0.0088
-2 -3 18 -0.9297 -0.0086
-2 -2 1 -42.6637 -0.2220
-2 -2 2 -20.5278 -0.3012
-2 -2 3 2.2150 -0.0292
-2 -2 4 6.0533 0.0769
-2 -2 5 -0.7700 0.0154
-2 -2 6 -2.4865 0.0218
-2 -2 7 1.9444 0.0660
-2 -2 8 4.4869 0.0452
-2 -2 9 2.9992 -0.0103
-2 -2 10 1.4046 -0.0257
-2 -2 11 1.6020 -0.0033
-2 -2 12 1.2474 0.0032
-2 -2 13 0.7311 -0.0124
-2 -2 14 1.1352 -0.0244
-2 -2 15 -1.3478 -0.0168
-2 -2 16 -4.3471 0.0022
-2 -2 17 -1.6819 -0.0026
-2 -2 18 1.3974 0.0088
-2 -1 1 -3.8750 -0.3598
-2 -1 2 21.0619 -0.0342
-2 -1 3 20.0480 0.2129
-2 -1 4 1.1304 0.0988
-2 -1 5 -13.3835 -0.0123
-2 -1 6 -12.6778 0.0306
-2 -1 7 -4.6422 0.0377
-2 -1 8 -0.2410 -0.0297
-2 -1 9 -0.0206 -0.0533
-2 -1 10 0.9992 -0.0217
-2 -1 11 2.3545 -0.0077
-2 -1 12 0.9291 -0.0140
-2 -1 13 -0.0022 -0.0039
-2 -1 14 0.9997 0.0096
-2 -1 15 -0.0375 0.0145
-2 -1 16 -0.8975 0.0133
-2 -1 17 0.1320 -0.0004
-2 -1 18 -0.6920 0.0115
-2 -1 19 -0.7820 0.0336
-2 0 1 30.7104 -0.1018
-2 0 2 29.3223 0.2788
-2 0 3 16.3876 0.1666
-2 0 4 2.7922 -0.0693
-2 0 5 -0.9561 -0.0457
-2 0 6 5.3955 0.0277
-2 0 7 9.6464 -0.0373
-2 0 8 4.8302 -0.0745
-2 0 9 -2.1272 -0.0078
-2 0 10 -4.8167 0.0284
-2 0 11 -5.8135 0.0030
-2 0 12 -5.3217 0.0026
-2 0 13 -0.7963 0.0254
-2 0 14 1.5798 0.0181
-2 0 15 -0.4885 0.0036
-2 0 16 0.7882 0.0072
-2 0 17 2.6986 0.0062
-2 0 18 -0.0710 0.0072
-2 0 19 -0.4039 -0.0028
-2 1 1 -38.5696 0.3379
-2 1 2 -21.6627 0.2357
-2 1 3 -16.8316 -0.1096
-2 1 4 -18.0208 -0.1462
-2 1 5 -11.4210 0.0103
-2 1 6 -0.1633 0.0060
-2 1 7 3.3006 -0.0668
-2 1 8 0.3705 -0.0159
-2 1 9 0.6450 0.0386
-2 1 10 3.9610 0.0068
-2 1 11 5.3183 -0.0022
-2 1 12 5.3267 0.0298
-2 1 13 1.8160 0.0181
-2 1 14 -7.0859 -0.0225
-2 1 15 -8.9539 -0.0227
-2 1 16 0.2873 -0.0054
-2 1 17 3.8263 -0.0174
-2 1 18 0.0352 -0.0231
-2 1 19 0.7788 -0.0044
-2 2 1 48.1796 0.2965
-2 2 2 39.8957 -0.1425
-2 2 3 16.1340 -0.2277
-2 2 4 0.3505 -0.0193
-2 2 5 -1.3356 0.0480
-2 2 6 0.0769 -0.0408
-2 2 7 -2.0062 -0.0103
-2 2 8 -3.9620 0.0828
-2 2 9 -3.3524 0.0446
-2 2 10 -2.3290 -0.0193
-2 2 11 -1.0575 -0.0006
-2 2 12 0.4120 0.0088
-2 2 13 -1.4503 -0.0171
-2 2 14 -1.5789 -0.0206
-2 2 15 7.5699 -0.0099
-2 2 16 11.5209 -0.0216
-2 2 17 -0.7120 -0.0367
-2 2 18 -8.3538 -0.0104
-2 2 19 -1.7320 0.0269
-2 3 1 -3.6334 -0.2001
-2 3 2 -8.4182 -0.3161
-2 3 3 -11.3625 -0.0578
-2 3 4 -5.5727 0.0946
-2 3 5 3.5692 0.0131
-2 3 6 8.1300 -0.0274
-2 3 7 5.8688 0.0555
-2 3 8 1.0557 0.0450
-2 3 9 -0.9556 -0.0389
-2 3 10 -0.5619 -0.0173
-2 3 11 -1.2005 0.0207
-2 3 12 -4.2357 -0.0127
-2 3 13 -6.9425 -0.0215
-2 3 14 -2.2467 0.0008
-2 3 15 6.0545 0.0030
-2 3 16 2.8003 0.0020
-2 3 17 -5.3426 0.0119
-2 3 18 -0.3596 0.0306
-2 3 19 6.3203 0.0335
-2 4 1 3.6481 -0.4248
-2 4 2 -4.2724 -0.0565
-2 4 3 -9.8553 0.1983
-2 4 4 -8.7482 0.1044
-2 4 5 -3.9714 -0.0251
-2 4 6 -0.5608 0.0325
-2 4 7 -1.1190 0.0813
-2 4 8 -1.5815 -0.0227
-2 4 9 1.2397 -0.0640
-2 4 10 3.5508 0.0045
-2 4 11 3.5146 0.0004
-2 4 12 2.4037 -0.0229
-2 4 13 1.0942 0.0116
-2 4 14 2.5200 0.0146
-2 4 15 3.4291 0.0018
-2 4 16 -1.5401 0.0180
-2 4 18 1.1921 0.0256
-2 4 19 0.7446 0.0151
-2 5 1 11.5132 -0.0307
-2 5 2 3.7840 0.3027
-2 5 3 0.4581 0.1774
-2 5 4 2.5073 -0.0374
-2 5 5 4.7412 -0.0292
-2 5 6 1.8342 0.0581
-2 5 7 -4.4048 -0.0097
-2 5 8 -6.1667 -0.0928
-2 5 9 -3.7593 -0.0115
-2 5 10 -2.7738 0.0347
-2 5 11 -2.1999 -0.0304
-2 5 12 -1.0208 -0.0140
-2 5 13 0.6086 0.0355
-2 5 14 4.6094 0.0088
-2 5 15 5.2696 -0.0075
-2 5 16 -1.1236 -0.0021
-2 5 17 -4.5820 -0.0104
-2 5 18 -2.2418 -0.0074
-2 5 19 -0.9901 -0.0090
-2 6 1 -5.2939 0.4271
-2 6 2 -5.8229 0.2458
-2 6 3 -0.9653 -0.0919
-2 6 4 4.0554 -0.1323
-2 6 5 5.1138 -0.0083
-2 6 6 2.3627 -0.0041
-2 6 7 0.8792 -0.0908
-2 6 8 3.3898 -0.0446
-2 6 9 4.9449 0.0566
-2 6 10 3.9969 0.0140
-2 6 11 2.9778 -0.0184
-2 6 12 -0.0483 0.0515
-2 6 13 -2.8006 0.0444
-2 6 14 -1.0620 -0.0095
-2 6 15 -0.3198 0.0002
-2 6 16 -2.3109 0.0006
-2 6 17 -1.0745 -0.0243
-2 6 18 1.4039 -0.0320
-2 6 19 1.7725 -0.0169
-2 7 1 -3.8385 0.2596
-2 7 2 -5.9287 -0.1620
-2 7 3 -6.6362 -0.2171
-2 7 4 -6.4603 -0.0403
-2 7 5 -5.2532 0.0181
-2 7 6 -3.8849 -0.0463
-2 7 7 -1.6343 -0.0329
-2 7 8 0.3604 0.0744
-2 7 9 -0.2490 0.0714
-2 7 10 -0.5152 -0.0123
-2 7 11 0.6767 0.0149
-2 7 12 0.7548 0.0417
-2 7 13 1.8185 -0.0246
-2 7 14 3.0902 -0.0338
-2 7 15 -0.1060 -0.0010
-2 7 16 -3.5349 -0.0111
-2 7 17 -2.1261 -0.0116
-2 7 18 0.8381 0.0034
-2 7 19 2.3440 0.0174
-2 8 1 5.4995 -0.2676
-2 8 2 5.6953 -0.3316
-2 8 3 6.3433 -0.0418
-2 8 4 6.8987 0.0953
-2 8 5 4.8285 0.0240
-2 8 6 0.6144 -0.0091
-2 8 7 -1.4097 0.0659
-2 8 8 -1.6463 0.0810
-2 8 9 -1.6189 -0.0188
-2 8 10 0.0506 -0.0434
-2 8 11 0.3926 0.0131
-2 8 12 -2.1273 -0.0176
-2 8 13 -2.8663 -0.0495
-2 8 14 -1.7723 -0.0085
-2 8 15 -1.2579 -0.0119
-2 8 16 -0.0545 -0.0255
-2 8 17 1.1282 -0.0012
-2 8 18 1.3438 0.0043
-2 9 1 -8.2468 -0.3597
-2 9 2 -5.9299 -0.0061
-2 9 3 -1.7712 0.1861
-2 9 4 0.5970 0.0799
-2 9 5 -0.1755 -0.0077
-2 9 6 0.0517 0.0479
-2 9 7 2.4647 0.0754
-2 9 8 2.6718 -0.0189
-2 9 9 1.9097 -0.0730
-2 9 10 2.7505 -0.0118
-2 9 11 1.8601 -0.0105
-2 9 12 -0.0377 -0.0599
-2 9 13 0.0692 -0.0017
-2 9 14 -0.0251 0.0468
-2 9 15 -0.6446 0.0091
-2 9 16 -0.5924 0.0114
-2 9 17 -0.6400 0.0130
-2 9 18 0.3428 0.0002
-2 10 1 4.7473 0.0351
-2 10 2 3.5987 0.3114
-2 10 3 0.8293 0.1612
-2 10 4 -2.1547 -0.0403
-2 10 5 -3.1827 -0.0396
-2 10 6 -1.0336 0.0190
-2 10 7 0.5905 -0.0333
-2 10 8 -0.1021 -0.0935
-2 10 9 0.8568 -0.0294
-2 10 10 1.7749 0.0272
-2 10 11 -1.0244 -0.0162
-2 10 12 -3.2199 0.0003
-2 10 13 -2.3510 0.0631
-2 10 14 -0.4181 0.0152
-2 10 15 2.0675 -0.0169
-2 10 16 2.6549 0.0278
-2 10 17 1.3077 -0.0057
-2 11 1 1.1669 0.3745
-2 11 2 2.2338 0.1571
-2 11 3 3.2030 -0.1137
-2 11 4 2.6478 -0.1089
-2 11 5 1.2006 0.0021
-2 11 6 0.8469 -0.0052
-2 11 7 -0.0493 -0.0775
-2 11 8 -1.6156 -0.0402
-2 11 9 -1.9206 0.0439
-2 11 10 -2.7982 0.0172
-2 11 11 -3.3291 -0.0135
-2 11 12 -0.7918 0.0587
-2 11 13 1.2228 0.0655
-2 11 14 0.7975 -0.0203
-2 11 15 -0.3281 -0.0170
-2 11 16 -2.2467 0.0040
-2 11 17 -2.0761 -0.0325
-2 12 1 -0.1433 0.1521
-2 12 2 -2.0494 -0.1972
-2 12 3 -3.2439 -0.1885
-2 12 4 -2.6099 -0.0233
-2 12 5 -0.4616 0.0192
-2 12 6 1.7478 -0.0394
-2 12 7 1.1617 -0.0304
-2 12 8 -0.1163 0.0593
-2 12 9 0.5084 0.0681
-2 12 10 0.7198 0.0053
-2 12 11 0.4978 0.0137
-2 12 12 0.3669 0.0352
-2 12 13 -1.0281 -0.0246
-2 12 14 -1.2306 -0.0392
-2 12 15 0.3463 0.0262
-2 12 16 1.1193 0.0006
-2 13 1 0.8566 -0.2664
-2 13 2 -0.0376 -0.2441
-2 13 3 0.6293 0.0246
-2 13 4 0.5084 0.1028
-2 13 5 -0.0084 0.0240
-2 13 6 0.3031 -0.0026
-2 13 7 -0.4605 0.0612
-2 13 8 -0.8672 0.0677
-2 13 9 0.3032 -0.0175
-2 13 10 1.1262 -0.0351
-2 13 11 1.6049 0.0130
-2 13 12 1.0774 -0.0079
-2 13 13 -0.4555 -0.0591
-2 13 14 0.1334 -0.0410
-2 13 15 1.4937 -0.0080
-2 13 16 0.9007 -0.0200
-2 14 1 1.7914 -0.2970
-2 14 2 -1.3537 0.0519
-2 14 3 -0.8226 0.1864
-2 14 4 0.2189 0.0642
-2 14 5 0.8873 -0.0258
-2 14 6 0.1048 0.0006
-2 14 7 -2.3348 0.0314
-2 14 8 -2.4266 -0.0205
-2 14 9 -1.1853 -0.0486
-2 14 10 -2.2400 -0.0067
-2 14 11 -3.1934 -0.0155
-2 14 12 -2.0450 -0.0332
-2 14 13 -0.1143 0.0234
-2 14 14 1.0489 0.0606
-2 14 15 -0.1529 0.0245
-2 15 1 -4.6997 0.0683
-2 15 2 -3.0703 0.2622
-2 15 3 0.8564 0.1046
-2 15 4 0.3491 -0.0585
-2 15 5 -1.4395 -0.0492
-2 15 6 -1.5069 0.0210
-2 15 7 -0.0645 -0.0061
-2 15 8 2.3399 -0.0822
-2 15 9 2.5337 -0.0356
-2 15 10 0.8145 0.0326
-2 15 11 0.8862 0.0042
-2 15 12 1.0102 0.0017
-2 15 13 -0.7218 0.0164
-2 15 14 -1.2899 -0.0001
-2 16 1 -0.4340 0.3246
-2 16 2 0.3623 0.1253
-2 16 3 0.7066 -0.1192
-2 16 4 -0.6199 -0.1183
-2 16 5 0.3732 -0.0127
-2 16 6 1.5961 0.0113
-2 16 7 1.2192 -0.0504
-2 16 8 0.3799 -0.0318
-2 16 9 -1.4746 0.0509
-2 16 10 -2.0947 0.0001
-2 16 11 0.6648 -0.0468
-2 16 12 2.5812 0.0498
-2 17 1 -3.9596 0.0639
-2 17 2 -0.9050 -0.1997
-2 17 3 0.1376 -0.1349
-2 17 4 -1.2364 0.0198
-2 17 5 -1.4479 0.0435
-2 17 6 -0.5256 -0.0049
-2 17 7 0.7532 -0.0236
-2 17 8 0.5921 0.0307
-2 17 9 -1.5689 0.0432
-2 17 10 -1.5105 -0.0113
-2 17 11 0.9992 0.0250
-2 18 1 -2.4055 -0.2329
-2 18 2 1.8382 -0.2051
-2 18 3 1.8822 0.0039
-2 18 4 0.7041 0.0553
-2 18 5 1.7651 0.0190
-2 18 6 2.4348 0.0093
-2 18 7 1.2277 0.0204
-2 18 8 -0.4735 0.0269
-2 19 3 -1.5824 0.1931
-1 -18 1 1.3299 0.0192
-1 -18 2 3.1783 0.1685
-1 -18 3 6.0236 0.0826
-1 -18 4 5.2986 -0.0124
-1 -17 1 -1.5614 0.2223
-1 -17 2 -3.8487 0.0977
-1 -17 3 -3.4966 -0.0384
-1 -17 4 -2.6879 -0.0467
-1 -17 5 -2.9559 -0.0302
-1 -17 6 -2.2356 -0.0358
-1 -16 1 1.0211 0.1016
-1 -16 2 2.3173 -0.1156
-1 -16 3 4.1098 -0.1024
-1 -16 4 1.6282 -0.0169
-1 -16 5 -2.1533 -0.0082
-1 -16 6 -2.1941 -0.0086
-1 -16 7 -0.0682 0.0153
-1 -16 8 -0.4419 0.0494
-1 -15 1 -2.7193 -0.2090
-1 -15 2 0.1585 -0.1818
-1 -15 3 2.1857 0.0205
-1 -15 4 2.1220 0.0565
-1 -15 5 1.6745 -0.0017
-1 -15 6 1.5925 0.0148
-1 -15 7 1.2714 0.0368
-1 -15 8 0.2124 0.0170
-1 -15 9 -0.6727 -0.0015
-1 -14 1 -1.5928 -0.2440
-1 -14 2 -1.8708 0.0352
-1 -14 3 -1.8715 0.1320
-1 -14 4 -2.9475 0.0318
-1 -14 5 -3.6877 -0.0025
-1 -14 6 -2.0807 0.0289
-1 -14 7 0.5943 -0.0055
-1 -14 8 0.7153 -0.0309
-1 -14 9 -1.4704 -0.0081
-1 -14 10 -2.2512 -0.0256
-1 -14 11 0.0506 -0.0485
-1 -13 1 -0.2862 0.0848
-1 -13 2 2.9130 0.2409
-1 -13 3 2.8306 0.0931
-1 -13 4 0.4556 -0.0353
-1 -13 5 -0.5358 -0.0103
-1 -13 6 0.5740 0.0046
-1 -13 7 0.8117 -0.0333
-1 -13 8 -1.7175 -0.0122
-1 -13 9 -3.3371 0.0126
-1 -13 10 -0.6711 -0.0181
-1 -13 11 2.5278 -0.0144
-1 -13 12 0.9972 0.0093
-1 -12 1 -0.7147 0.3177
-1 -12 2 -1.1507 0.0897
-1 -12 3 -0.4145 -0.1057
-1 -12 4 2.0520 -0.0645
-1 -12 5 3.7305 0.0092
-1 -12 6 3.0354 -0.0265
-1 -12 7 0.3660 -0.0461
-1 -12 8 -2.0169 0.0086
-1 -12 9 -0.8975 0.0178
-1 -12 10 2.0634 -0.0022
-1 -12 11 1.5562 0.0218
-1 -12 12 -1.2108 0.0191
-1 -12 13 -0.0181 -0.0187
-1 -11 1 -2.3291 0.0749
-1 -11 2 -0.2640 -0.2170
-1 -11 3 2.0700 -0.1416
-1 -11 4 2.1686 0.0000
-1 -11 5 -0.2203 -0.0081
-1 -11 6 -1.9831 -0.0447
-1 -11 7 -1.6763 0.0064
-1 -11 8 -0.4022 0.0486
-1 -11 9 1.3549 0.0154
-1 -11 10 2.5905 -0.0009
-1 -11 11 2.2102 0.0104
-1 -11 12 1.7802 -0.0060
-1 -11 13 2.1586 -0.0100
-1 -11 14 1.1957 0.0166
-1 -10 1 1.3544 -0.3014
-1 -10 2 2.7907 -0.2094
-1 -10 3 3.7029 0.0482
-1 -10 4 1.4207 0.0770
-1 -10 5 -2.5536 0.0016
-1 -10 6 -3.7117 0.0134
-1 -10 7 -2.6191 0.0576
-1 -10 8 -1.9931 0.0295
-1 -10 9 -1.0611 -0.0199
-1 -10 10 -0.2271 -0.0181
-1 -10 11 -1.7937 -0.0096
-1 -10 12 -3.7018 -0.0232
-1 -10 13 -2.3028 -0.0257
-1 -10 14 0.9818 -0.0018
-1 -10 15 2.3645 0.0400
-1 -9 1 -1.8069 -0.2942
-1 -9 2 1.7430 0.1142
-1 -9 3 3.6298 0.2113
-1 -9 4 0.9446 0.0522
-1 -9 5 -1.0326 -0.0054
-1 -9 6 1.1938 0.0440
-1 -9 7 3.1699 0.0322
-1 -9 8 2.7567 -0.0295
-1 -9 9 2.5663 -0.0339
-1 -9 10 2.0315 0.0010
-1 -9 11 0.1736 0.0052
-1 -9 12 -0.1989 -0.0067
-1 -9 13 0.9645 0.0024
-1 -9 14 0.1246 0.0282
-1 -9 15 -2.4315 0.0442
-1 -8 1 -1.3159 0.1386
-1 -8 2 1.7389 0.3180
-1 -8 3 0.0350 0.0752
-1 -8 4 -4.7592 -0.0843
-1 -8 5 -4.9080 -0.0212
-1 -8 6 -1.4577 0.0138
-1 -8 7 -0.6511 -0.0445
-1 -8 8 -1.4338 -0.0527
-1 -8 9 -0.6537 -0.0017
-1 -8 10 -0.2220 0.0158
-1 -8 11 -1.0007 0.0122
-1 -8 12 -0.8178 0.0236
-1 -8 13 0.6244 0.0247
-1 -8 14 2.0420 0.0128
-1 -8 15 2.3645 0.0096
-1 -8 16 0.7705 0.0064
-1 -7 1 5.5837 0.4355
-1 -7 2 8.9525 0.0978
-1 -7 3 3.6126 -0.1895
-1 -7 4 -1.6110 -0.1155
-1 -7 5 -0.2994 0.0092
-1 -7 6 1.7587 -0.0303
-1 -7 7 0.3053 -0.0677
-1 -7 8 -0.6688 -0.0057
-1 -7 9 0.1253 0.0324
-1 -7 10 -0.2224 0.0196
-1 -7 11 -1.5334 0.0205
-1 -7 12 -1.7063 0.0079
-1 -7 13 -0.3597 -0.0172
-1 -7 14 0.9193 0.0017
-1 -7 15 0.3447 0.0336
-1 -7 16 -0.8065 0.0140
-1 -7 17 0.1502 -0.0417
-1 -6 1 -2.4745 0.1012
-1 -6 2 -0.8025 -0.2730
-1 -6 3 -5.6200 -0.1817
-1 -6 4 -5.7957 0.0272
-1 -6 5 0.2683 0.0238
-1 -6 6 3.6701 -0.0414
-1 -6 7 2.4383 0.0190
-1 -6 8 1.5283 0.0768
-1 -6 9 1.3168 0.0320
-1 -6 10 -0.0542 0.0033
-1 -6 11 -1.5726 0.0134
-1 -6 12 -1.2984 -0.0116
-1 -6 13 0.8063 -0.0304
-1 -6 14 1.4353 -0.0180
-1 -6 15 -1.2368 -0.0174
-1 -6 16 -3.5367 -0.0204
-1 -6 17 -3.0309 -0.0122
-1 -5 1 14.7710 -0.4298
-1 -5 2 5.8906 -0.2722
-1 -5 3 -6.0097 0.0741
-1 -5 4 -6.0216 0.1277
-1 -5 5 -0.0915 0.0190
-1 -5 6 0.0233 0.0191
-1 -5 7 -2.1416 0.0744
-1 -5 8 -0.9871 0.0327
-1 -5 9 -0.2768 -0.0222
-1 -5 10 -1.8391 -0.0043
-1 -5 11 -2.1752 -0.0129
-1 -5 12 0.4374 -0.0527
-1 -5 13 3.2322 -0.0335
-1 -5 14 2.4059 0.0093
-1 -5 15 -0.1438 0.0214
-1 -5 16 0.2077 0.0051
-1 -5 17 2.2843 -0.0309
-1 -5 18 2.6830 -0.0465
-1 -4 1 19.9562 -0.3506
-1 -4 2 5.2841 0.1462
-1 -4 3 -4.2161 0.2220
-1 -4 4 1.0820 0.0285
-1 -4 5 6.7938 -0.0261
-1 -4 6 4.7660 0.0373
-1 -4 7 1.1255 0.0189
-1 -4 8 -2.1566 -0.0570
-1 -4 9 -4.9053 -0.0520
-1 -4 10 -3.1192 -0.0128
-1 -4 11 1.0532 -0.0233
-1 -4 12 2.2671 -0.0188
-1 -4 13 0.6394 0.0128
-1 -4 14 -1.2790 0.0148
-1 -4 15 -1.4604 0.0084
-1 -4 16 -0.1894 0.0072
-1 -4 17 0.1112 0.0019
-1 -4 18 -0.9575 -0.0101
-1 -3 1 -7.3142 0.2861
-1 -3 2 -22.8460 0.4174
-1 -3 3 -18.6487 0.0737
-1 -3 4 -1.1296 -0.0958
-1 -3 5 7.4136 -0.0209
-1 -3 6 4.0436 0.0011
-1 -3 7 -0.1183 -0.0612
-1 -3 8 -0.3714 -0.0588
-1 -3 9 2.5969 0.0027
-1 -3 10 4.6576 0.0105
-1 -3 11 2.1525 -0.0087
-1 -3 12 -0.1077 0.0112
-1 -3 13 0.8570 0.0250
-1 -3 14 0.3694 0.0226
-1 -3 15 -1.7415 0.0246
-1 -3 16 -1.6176 0.0050
-1 -3 17 0.1554 -0.0186
-1 -3 18 0.7992 -0.0328
-1 -2 1 12.0310 0.5237
-1 -2 2 -9.4966 0.0915
-1 -2 3 -8.2733 -0.2090
-1 -2 4 1.9508 -0.0852
-1 -2 5 1.2118 0.0204
-1 -2 6 -6.1056 -0.0459
-1 -2 7 -8.5105 -0.0584
-1 -2 8 -5.4663 0.0265
-1 -2 9 -1.1172 0.0574
-1 -2 10 0.7388 0.0189
-1 -2 11 0.4520 0.0112
-1 -2 12 1.0504 0.0189
-1 -2 13 0.6394 0.0013
-1 -2 14 -1.0988 0.0029
-1 -2 15 -0.2531 0.0082
-1 -2 16 1.4229 -0.0117
-1 -2 17 0.5231 -0.0232
-1 -2 18 -0.8634 -0.0389
-1 -2 19 0.2631 -0.0186
-1 -1 1 2.8073 0.0874
-1 -1 2 -19.4038 -0.2874
-1 -1 3 0.9670 -0.2032
-1 -1 4 20.2693 0.0345
-1 -1 5 16.2672 0.0257
-1 -1 6 4.8963 -0.0306
-1 -1 7 0.8327 0.0418
-1 -1 8 1.8690 0.0764
-1 -1 9 1.8910 0.0086
-1 -1 10 -1.1263 -0.0194
-1 -1 11 -3.1901 0.0110
-1 -1 12 -1.8847 0.0015
-1 -1 13 -0.7141 -0.0177
-1 -1 14 -0.3834 -0.0001
-1 -1 15 0.4888 -0.0036
-1 -1 16 1.4720 -0.0145
-1 -1 17 2.8741 0.0005
-1 -1 18 2.9801 0.0041
-1 -1 19 0.7752 0.0422
-1 0 1 -103.2457 -0.1558
-1 0 2 -47.2631 -0.2946
-1 0 3 5.3331 0.0180
-1 0 4 15.6283 0.1319
-1 0 5 0.9429 -0.0109
-1 0 6 -7.9577 -0.0098
-1 0 7 -4.6238 0.0816
-1 0 8 1.9266 0.0309
-1 0 9 4.9861 -0.0439
-1 0 10 4.9946 -0.0152
-1 0 11 5.1204 0.0019
-1 0 12 3.3657 -0.0320
-1 0 13 -1.2144 -0.0181
-1 0 14 -3.6266 0.0168
-1 0 15 -3.2822 0.0047
-1 0 16 -2.7172 -0.0020
-1 0 17 -2.0623 -0.0010
-1 0 18 -2.0889 -0.0162
-1 0 19 -1.3075 0.0207
-1 1 1 57.7753 -0.3301
-1 1 2 54.1713 -0.0597
-1 1 3 34.1627 0.2054
-1 1 4 5.8871 0.0504
-1 1 5 -13.2302 -0.0810
-1 1 6 -14.6781 0.0297
-1 1 7 -5.5914 0.0395
-1 1 8 0.7883 -0.0723
-1 1 9 -0.7247 -0.0494
-1 1 10 -4.0646 0.0253
-1 1 11 -4.8146 -0.0055
-1 1 12 -4.4346 -0.0302
-1 1 13 -0.6779 0.0207
-1 1 14 5.4508 0.0346
-1 1 15 6.2443 -0.0005
-1 1 16 3.1042 -0.0008
-1 1 17 1.2990 0.0033
-1 1 18 -0.6087 -0.0072
-1 1 19 -1.4859 0.0117
-1 2 1 -48.2179 -0.2513
-1 2 2 -16.1436 0.2173
-1 2 3 5.1273 0.1730
-1 2 4 5.9133 -0.0840
-1 2 5 1.8412 -0.0318
-1 2 6 5.1802 0.0755
-1 2 7 8.9818 -0.0362
-1 2 8 4.5310 -0.0795
-1 2 9 -2.0459 0.0233
-1 2 10 -2.6180 0.0266
-1 2 11 -1.3391 -0.0286
-1 2 12 -1.1930 0.0064
-1 2 13 0.7979 0.0401
-1 2 14 -0.6250 0.0002
-1 2 15 -6.5403 -0.0134
-1 2 16 -5.4666 0.0233
-1 2 17 1.3802 0.0131
-1 2 18 3.5144 -0.0244
-1 2 19 2.6014 -0.0159
-1 3 1 6.0104 0.3091
-1 3 2 13.8099 0.2608
-1 3 3 3.6206 -0.0800
-1 3 4 -10.8228 -0.1322
-1 3 5 -13.3245 0.0436
-1 3 6 -5.3580 0.0089
-1 3 7 1.1226 -0.0856
-1 3 8 2.2132 0.0185
-1 3 9 3.0457 0.0716
-1 3 10 4.0768 -0.0176
-1 3 11 2.7542 -0.0213
-1 3 12 3.0413 0.0304
-1 3 13 3.3567 0.0011
-1 3 14 -3.1095 -0.0320
-1 3 15 -6.6818 -0.0031
-1 3 16 0.8961 0.0053
-1 3 17 5.2596 -0.0413
-1 3 18 0.5902 -0.0438
-1 3 19 -1.7124 0.0142
-1 4 1 18.8653 0.3240
-1 4 2 20.4716 -0.0649
-1 4 3 9.9375 -0.2299
-1 4 4 -0.0876 -0.0403
-1 4 5 -2.0295 0.0513
-1 4 6 -0.0041 -0.0600
-1 4 7 -1.3149 -0.0229
-1 4 8 -5.8140 0.0816
-1 4 9 -7.8746 0.0061
-1 4 10 -6.7556 -0.0443
-1 4 11 -3.9410 0.0239
-1 4 12 0.4567 0.0157
-1 4 13 1.3922 -0.0288
-1 4 14 -0.6487 0.0034
-1 4 15 3.6141 0.0264
-1 4 16 8.1395 -0.0147
-1 4 17 2.0590 -0.0395
-1 4 18 -3.9063 0.0062
-1 4 19 -1.7071 0.0455
-1 5 1 -0.5169 -0.1601
-1 5 2 1.0820 -0.3231
-1 5 3 -1.9677 -0.0796
-1 5 4 -2.9927 0.1249
-1 5 5 0.0936 0.0213
-1 5 6 4.7440 -0.0474
-1 5 7 6.0601 0.0729
-1 5 8 3.9722 0.0530
-1 5 9 2.8785 -0.0611
-1 5 10 3.0081 -0.0048
-1 5 11 2.8500 0.0409
-1 5 12 1.0009 -0.0325
-1 5 13 -4.5771 -0.0319
-1 5 14 -7.5096 0.0199
-1 5 15 -2.0879 0.0085
-1 5 16 2.7336 -0.0082
-1 5 17 2.5796 0.0155
-1 5 18 3.0852 0.0347
-1 5 19 1.4836 0.0081
-1 6 1 3.8818 -0.3883
-1 6 2 -2.8549 -0.0856
-1 6 3 -10.1401 0.1987
-1 6 4 -11.7861 0.1234
-1 6 5 -6.5586 -0.0348
-1 6 6 -0.1893 0.0390
-1 6 7 -0.3592 0.0881
-1 6 8 -3.8154 -0.0521
-1 6 9 -3.4041 -0.0622
-1 6 10 -0.5809 0.0425
-1 6 11 1.6397 -0.0075
-1 6 12 2.4871 -0.0542
-1 6 13 2.3107 0.0212
-1 6 14 4.3818 0.0343
-1 6 15 6.0827 -0.0090
-1 6 16 1.8423 0.0046
-1 6 17 -2.9516 0.0370
-1 6 18 -3.7759 0.0278
-1 6 19 -3.8422 -0.0095
-1 7 1 8.9866 -0.0259
-1 7 2 7.1400 0.2810
-1 7 3 5.6113 0.1814
-1 7 4 5.1638 -0.0542
-1 7 5 5.4704 -0.0478
-1 7 6 2.8040 0.0551
-1 7 7 -3.1794 -0.0374
-1 7 8 -5.0687 -0.1096
-1 7 9 -1.5952 0.0139
-1 7 10 1.0475 0.0380
-1 7 11 1.0079 -0.0538
-1 7 12 -0.9173 -0.0075
-1 7 13 -2.7193 0.0568
-1 7 14 -1.6518 0.0172
-1 7 15 -0.2715 0.0062
-1 7 16 -0.0154 0.0227
-1 7 17 0.8371 -0.0068
-1 7 18 -0.7173 -0.0532
-1 7 19 -3.0022 -0.0475
-1 8 1 -6.1828 0.3592
-1 8 2 -6.9469 0.2327
-1 8 3 -6.4739 -0.0849
-1 8 4 -3.8855 -0.1447
-1 8 5 0.6325 -0.0056
-1 8 6 2.5570 -0.0090
-1 8 7 1.5018 -0.0979
-1 8 8 1.7303 -0.0103
-1 8 9 2.4967 0.0823
-1 8 10 2.1294 0.0010
-1 8 11 1.6518 -0.0144
-1 8 12 1.0601 0.0611
-1 8 13 1.3859 0.0227
-1 8 14 2.0539 -0.0283
-1 8 15 0.6462 -0.0040
-1 8 16 -0.4208 -0.0074
-1 8 17 -0.8749 -0.0334
-1 8 18 -3.0580 -0.0398
-1 8 19 -1.9463 -0.0020
-1 9 1 3.0008 0.1958
-1 9 2 0.6997 -0.1660
-1 9 3 -1.7576 -0.2288
-1 9 4 -1.7440 -0.0255
-1 9 5 -0.2124 0.0503
-1 9 6 -1.4105 -0.0448
-1 9 7 -3.0192 -0.0152
-1 9 8 -1.4155 0.0990
-1 9 9 1.0530 0.0398
-1 9 10 2.0429 -0.0429
-1 9 11 1.0899 0.0240
-1 9 12 -0.3719 0.0299
-1 9 13 -0.1226 -0.0430
-1 9 14 -0.6396 -0.0195
-1 9 15 -2.4523 0.0056
-1 9 16 -1.7885 -0.0152
-1 9 17 -0.9517 -0.0023
-1 9 18 -0.8012 0.0082
-1 10 1 -0.7332 -0.2170
-1 10 2 0.9915 -0.3001
-1 10 3 2.7989 -0.0481
-1 10 4 4.6450 0.1188
-1 10 5 2.9529 0.0391
-1 10 6 -1.9881 -0.0028
-1 10 7 -3.6564 0.0867
-1 10 8 -1.6370 0.0543
-1 10 9 -0.3872 -0.0611
-1 10 10 -0.5648 -0.0161
-1 10 11 -0.9753 0.0374
-1 10 12 -0.0227 -0.0494
-1 10 13 1.0196 -0.0511
-1 10 14 -1.1051 0.0288
-1 10 15 -2.1559 0.0050
-1 10 16 0.7358 -0.0097
-1 10 17 1.2540 0.0167
-1 10 18 -0.2760 -0.0052
-1 11 1 -1.2122 -0.3123
-1 11 2 -2.0821 0.0092
-1 11 3 -2.1222 0.2143
-1 11 4 -1.1376 0.0988
-1 11 5 -1.0014 -0.0400
-1 11 6 0.3934 0.0273
-1 11 7 3.9446 0.0603
-1 11 8 5.0144 -0.0615
-1 11 9 3.4098 -0.0706
-1 11 10 2.3301 0.0289
-1 11 11 1.5396 -0.0144
-1 11 12 0.7916 -0.0699
-1 11 13 -0.9311 0.0211
-1 11 14 -3.1181 0.0426
-1 11 15 -1.1214 -0.0146
-1 11 16 1.9446 0.0205
-1 11 17 0.1175 0.0126
-1 11 18 -1.1325 -0.0385
-1 12 1 1.8355 0.0596
-1 12 2 3.4505 0.2642
-1 12 3 3.5420 0.1279
-1 12 4 0.1989 -0.0614
-1 12 5 -3.7602 -0.0340
-1 12 6 -3.0246 0.0435
-1 12 7 0.0593 -0.0517
-1 12 8 0.4511 -0.1070
-1 12 9 -0.0844 0.0114
-1 12 10 -0.4145 0.0395
-1 12 11 -1.3296 -0.0453
-1 12 12 -0.9622 0.0034
-1 12 13 -0.2698 0.0785
-1 12 14 -0.0173 0.0029
-1 12 15 1.5550 -0.0232
-1 12 16 1.1001 0.0440
-1 12 17 -1.7508 0.0071
-1 13 1 4.4951 0.3192
-1 13 2 3.1487 0.1233
-1 13 3 -1.2113 -0.1293
-1 13 4 -3.3810 -0.1210
-1 13 5 -0.8279 0.0166
-1 13 6 3.0259 -0.0069
-1 13 7 2.0745 -0.0913
-1 13 8 -2.1426 0.0023
-1 13 9 -3.3922 0.0901
-1 13 10 -2.2363 0.0095
-1 13 11 -0.8053 -0.0194
-1 13 12 0.9833 0.0535
-1 13 13 0.7113 0.0310
-1 13 14 -0.9290 -0.0268
-1 13 15 -1.0795 0.0229
-1 13 16 -1.3938 0.0231
-1 14 1 -2.2859 0.1097
-1 14 2 -2.9924 -0.1938
-1 14 3 -2.8799 -0.1751
-1 14 4 -1.2936 0.0093
-1 14 5 1.0764 0.0453
-1 14 6 2.8388 -0.0412
-1 14 7 1.8609 0.0041
-1 14 8 0.5774 0.0981
-1 14 9 1.9211 0.0207
-1 14 10 2.9832 -0.0461
-1 14 11 1.8039 0.0297
-1 14 12 -0.5180 0.0377
-1 14 13 -2.9182 -0.0468
-1 14 14 -2.4979 -0.0425
-1 14 15 0.5286 0.0192
-1 15 1 6.1779 -0.2286
-1 15 2 2.5185 -0.2126
-1 15 3 -1.6676 0.0256
-1 15 4 -2.0139 0.1188
-1 15 5 0.3580 0.0217
-1 15 6 0.8028 -0.0171
-1 15 7 -2.1139 0.0698
-1 15 8 -2.7604 0.0509
-1 15 9 0.2837 -0.0434
-1 15 10 1.1128 -0.0138
-1 15 11 -0.5728 -0.0002
-1 15 12 -0.3305 -0.0704
-1 15 13 1.4712 -0.0465
-1 15 14 1.9121 0.0143
-1 16 1 -0.7487 -0.2359
-1 16 2 -3.2315 0.0328
-1 16 3 -1.5806 0.1709
-1 16 4 0.8128 0.0636
-1 16 5 1.0151 -0.0406
-1 16 6 -0.5148 0.0288
-1 16 7 -1.6224 0.0671
-1 16 8 -0.0217 -0.0575
-1 16 9 1.4571 -0.0772
-1 16 10 -0.8524 0.0261
-1 16 11 -3.3130 -0.0009
-1 16 12 -2.3194 -0.0403
-1 16 13 -0.5006 0.0230
-1 17 1 0.5026 0.1146
-1 17 2 -0.6904 0.2441
-1 17 3 -0.6116 0.0746
-1 17 4 0.0978 -0.0883
-1 17 5 1.7063 -0.0455
-1 17 6 1.4639 0.0437
-1 17 7 -0.5664 -0.0262
-1 17 8 0.0201 -0.0813
-1 17 9 1.7308 0.0303
-1 17 10 0.5683 0.0331
-1 17 11 -0.2462 -0.0788
-1 17 12 1.4861 -0.0097
-1 18 1 1.1648 0.2191
-1 18 2 -0.7192 0.0266
-1 18 3 -1.4398 -0.1180
-1 18 4 -1.4057 -0.0659
-1 18 5 -2.0670 0.0238
-1 18 6 -3.1317 0.0001
-1 18 7 -1.0090 -0.0636
-1 18 8 3.4045 -0.0024
-1 18 9 3.1950 0.0634
-1 18 10 -1.2877 -0.0175
-1 19 1 -1.9656 0.0537
-1 19 2 -0.8178 -0.1651
-1 19 3 0.9401 -0.1331
-1 19 4 1.5384 0.0011
-1 19 5 1.7168 0.0400
-1 19 6 1.6551 -0.0067
0 -18 1 -3.9148 -0.1027
0 -18 2 -7.1102 -0.1641
0 -18 3 -6.5369 0.0076
0 -18 4 -1.7850 0.1016
0 -17 1 1.0529 -0.2181
0 -17 2 2.8891 -0.0150
0 -17 3 5.0163 0.1299
0 -17 4 4.1666 0.0542
0 -17 5 2.3513 -0.0386
0 -17 6 0.8913 -0.0001
0 -16 1 -2.6449 -0.0093
0 -16 2 -1.8825 0.1692
0 -16 3 -0.9894 0.0947
0 -16 4 1.4389 -0.0296
0 -16 5 4.3026 -0.0336
0 -16 6 2.5846 -0.0088
0 -16 7 -1.3153 -0.0303
0 -16 8 -1.2850 -0.0310
0 -15 1 1.3684 0.2363
0 -15 2 0.7234 0.1334
0 -15 3 -0.7993 -0.0736
0 -15 4 -1.0058 -0.0770
0 -15 5 -1.0675 -0.0071
0 -15 6 -2.8372 -0.0207
0 -15 7 -2.9772 -0.0271
0 -15 8 -0.3164 0.0164
0 -15 9 1.5758 0.0340
0 -15 10 1.8953 0.0080
0 -14 1 -0.8413 0.1560
0 -14 2 -1.5332 -0.1156
0 -14 3 -1.3687 -0.1299
0 -14 4 0.7574 0.0126
0 -14 5 1.7514 0.0107
0 -14 6 -0.3326 -0.0295
0 -14 7 -1.3673 0.0306
0 -14 8 0.2146 0.0599
0 -14 9 1.0405 0.0185
0 -14 10 -0.5066 -0.0008
0 -14 11 -2.8277 -0.0013
0 -13 1 -0.4362 -0.1672
0 -13 2 -1.7962 -0.2302
0 -13 3 -0.8849 -0.0218
0 -13 4 2.7189 0.0697
0 -13 5 3.2480 -0.0049
0 -13 6 -0.0172 0.0147
0 -13 7 -1.1405 0.0653
0 -13 8 0.9768 0.0076
0 -13 9 1.7652 -0.0319
0 -13 10 -0.2802 -0.0044
0 -13 11 -1.7332 -0.0035
0 -13 12 -0.3162 -0.0218
0 -12 1 -3.0031 -0.2702
0 -12 2 -2.8437 -0.0085
0 -12 3 -0.6932 0.1603
0 -12 4 0.5252 0.0514
0 -12 5 -1.3299 -0.0290
0 -12 6 -2.2426 0.0381
0 -12 7 1.2977 0.0137
0 -12 8 4.1315 -0.0687
0 -12 9 1.1105 -0.0377
0 -12 10 -2.6631 0.0039
0 -12 11 -0.6213 -0.0241
0 -12 12 3.1160 -0.0332
0 -12 13 1.7871 0.0025
0 -11 1 -0.2083 0.0364
0 -11 2 -1.0774 0.2403
0 -11 3 -0.5478 0.1100
0 -11 4 0.1921 -0.0525
0 -11 5 -0.9038 -0.0063
0 -11 6 -1.5699 0.0310
0 -11 7 -0.5922 -0.0567
0 -11 8 -1.1546 -0.0526
0 -11 9 -3.0081 0.0280
0 -11 10 -1.8758 0.0140
0 -11 11 0.3920 -0.0221
0 -11 12 -1.4967 -0.0033
0 -11 13 -4.0454 0.0073
0 -11 14 -1.1803 -0.0048
0 -10 1 -1.2875 0.3042
0 -10 2 -0.6409 0.1280
0 -10 3 2.3280 -0.1014
0 -10 4 4.5507 -0.0876
0 -10 5 4.5073 0.0064
0 -10 6 4.5904 -0.0343
0 -10 7 4.6145 -0.0619
0 -10 8 2.1470 0.0225
0 -10 9 -0.7340 0.0477
0 -10 10 -0.2507 0.0034
0 -10 11 1.8642 0.0064
0 -10 12 2.4544 0.0173
0 -10 13 2.0878 0.0069
0 -10 14 0.7539 0.0042
0 -10 15 -1.6827 -0.0201
0 -9 1 -3.1248 0.1232
0 -9 2 -2.7511 -0.2013
0 -9 3 -0.3025 -0.1944
0 -9 4 0.0515 -0.0125
0 -9 5 -1.7794 0.0242
0 -9 6 -2.5128 -0.0258
0 -9 7 -2.2177 0.0219
0 -9 8 -2.3456 0.0669
0 -9 9 -1.2339 0.0171
0 -9 10 1.4688 -0.0107
0 -9 11 2.0551 0.0023
0 -9 12 -0.2468 -0.0052
0 -9 13 -1.6969 0.0004
0 -9 14 -0.5717 0.0160
0 -9 15 1.9788 0.0122
0 -9 16 3.5702 0.0387
0 -8 1 2.2870 -0.2617
0 -8 2 3.0672 -0.2432
0 -8 3 4.7095 0.0271
0 -8 4 2.8621 0.1079
0 -8 5 -0.5601 0.0063
0 -8 6 -1.5874 0.0015
0 -8 7 -1.3317 0.0606
0 -8 8 -1.5099 0.0169
0 -8 9 -0.8314 -0.0356
0 -8 10 0.4331 -0.0119
0 -8 11 0.4898 -0.0082
0 -8 12 -0.0868 -0.0274
0 -8 13 -0.7146 -0.0076
0 -8 14 -1.7013 0.0066
0 -8 15 -1.5674 -0.0049
0 -8 16 -0.1336 0.0130
0 -7 1 -9.2075 -0.2971
0 -7 2 -2.7210 0.0696
0 -7 3 2.8684 0.2276
0 -7 4 1.8681 0.0791
0 -7 5 0.4710 -0.0077
0 -7 6 2.3163 0.0522
0 -7 7 3.0557 0.0281
0 -7 8 1.6314 -0.0471
0 -7 9 0.9960 -0.0182
0 -7 10 0.9115 0.0122
0 -7 11 0.1991 -0.0244
0 -7 12 -0.8321 -0.0140
0 -7 13 -2.1699 0.0350
0 -7 14 -2.2907 0.0242
0 -7 15 -0.0012 -0.0070
0 -7 16 1.2426 0.0172
0 -7 17 -0.9547 0.0390
0 -6 1 0.0099 0.1264
0 -6 2 3.5758 0.3126
0 -6 3 1.0835 0.0910
0 -6 4 -5.6169 -0.0950
0 -6 5 -7.1621 -0.0207
0 -6 6 -4.5641 0.0244
0 -6 7 -3.0949 -0.0649
0 -6 8 -1.5007 -0.0553
0 -6 9 0.8602 0.0254
0 -6 10 1.7884 0.0061
0 -6 11 1.8463 -0.0166
0 -6 12 1.0263 0.0323
0 -6 13 -1.0872 0.0418
0 -6 14 -0.8581 0.0017
0 -6 15 2.5019 0.0009
0 -6 16 3.7992 0.0270
0 -6 17 1.7264 0.0041
0 -6 18 0.5066 -0.0409
0 -5 1 -0.9013 0.3868
0 -5 2 9.8968 0.0810
0 -5 3 9.5886 -0.1980
0 -5 4 2.8456 -0.1283
0 -5 5 0.9268 0.0057
0 -5 6 2.4662 -0.0526
0 -5 7 2.0582 -0.0770
0 -5 8 0.4790 0.0359
0 -5 9 -0.7889 0.0495
0 -5 10 -0.8981 -0.0198
0 -5 11 -0.2553 0.0058
0 -5 12 -1.9411 0.0426
0 -5 13 -4.0263 0.0065
0 -5 14 -1.7712 -0.0209
0 -5 15 1.1456 -0.0147
0 -5 16 -0.6184 -0.0123
0 -5 17 -3.6061 -0.0206
0 -5 18 -3.0770 -0.0248
0 -4 1 -8.6732 0.0612
0 -4 2 4.0234 -0.3029
0 -4 3 -1.1673 -0.1934
0 -4 4 -8.0518 0.0503
0 -4 5 -3.3138 0.0410
0 -4 6 3.1393 -0.0480
0 -4 7 3.8608 0.0369
0 -4 8 3.5506 0.0986
0 -4 9 3.2520 0.0098
0 -4 10 1.1928 -0.0197
0 -4 11 -1.5011 0.0193
0 -4 12 -2.9762 -0.0106
0 -4 13 -1.0747 -0.0371
0 -4 14 2.6242 -0.0142
0 -4 15 3.1916 -0.0087
0 -4 16 0.8972 -0.0147
0 -4 17 -0.0572 -0.0090
0 -4 18 0.9824 -0.0019
0 -3 1 21.8836 -0.4457
0 -3 2 19.5062 -0.2742
0 -3 3 -3.7923 0.1083
0 -3 4 -15.6452 0.1532
0 -3 5 -9.2868 0.0032
0 -3 6 -3.2920 0.0207
0 -3 7 -2.5375 0.1013
0 -3 8 -2.4757 0.0183
0 -3 9 -3.6242 -0.0591
0 -3 10 -3.0580 -0.0054
0 -3 11 0.6034 0.0045
0 -3 12 1.9038 -0.0336
0 -3 13 0.2180 -0.0126
0 -3 14 -0.3609 -0.0062
0 -3 15 0.2863 -0.0275
0 -3 16 -0.2093 -0.0060
0 -3 17 -1.4684 0.0241
0 -3 18 -1.3861 0.0192
0 -3 19 -0.9619 -0.0177
0 -2 1 38.3458 -0.4320
0 -2 2 20.0108 0.1652
0 -2 3 -2.8907 0.2822
0 -2 4 -1.6752 0.0237
0 -2 5 10.7286 -0.0495
0 -2 6 12.3573 0.0586
0 -2 7 6.5587 0.0256
0 -2 8 1.1795 -0.0780
0 -2 9 -2.1729 -0.0390
0 -2 10 -1.4674 0.0079
0 -2 11 -0.3622 -0.0391
0 -2 12 -1.8797 -0.0260
0 -2 13 -1.0425 0.0262
0 -2 14 2.6119 0.0075
0 -2 15 3.1369 0.0007
0 -2 16 0.1914 0.0293
0 -2 17 -0.7045 0.0262
0 -2 18 1.0734 -0.0005
0 -2 19 0.7835 -0.0349
0 -1 1 -21.5034 0.3036
0 -1 2 -22.4804 0.4243
0 -1 3 -29.0826 0.0471
0 -1 4 -14.8446 -0.1433
0 -1 5 1.9288 -0.0104
0 -1 6 4.3347 0.0209
0 -1 7 0.7594 -0.0872
0 -1 8 -1.3093 -0.0551
0 -1 9 -0.2806 0.0467
0 -1 10 3.4146 0.0131
0 -1 11 4.2823 -0.0237
0 -1 12 1.8071 0.0378
0 -1 13 0.9508 0.0394
0 -1 14 1.1629 -0.0089
0 -1 15 -1.0015 0.0075
0 -1 16 -4.6342 0.0166
0 -1 17 -5.5448 -0.0096
0 -1 18 -3.1269 -0.0251
0 -1 19 -0.1508 -0.0326
0 0 1 104.3654 0.4072
0 0 2 12.6085 0.1783
0 0 3 -28.1081 -0.1612
0 0 4 -13.1618 -0.0773
0 0 5 2.3724 0.0631
0 0 6 -0.8229 -0.0298
0 0 7 -6.3420 -0.0663
0 0 8 -6.3442 0.0412
0 0 9 -2.7704 0.0417
0 0 10 0.2257 -0.0323
0 0 11 -0.4456 0.0095
0 0 12 -0.7736 0.0519
0 0 13 1.9079 -0.0118
0 0 14 3.0835 -0.0293
0 0 15 0.3215 0.0096
0 0 16 -1.3138 -0.0024
0 0 17 2.6010 -0.0045
0 0 18 6.2089 0.0121
0 0 19 3.7090 0.0031
0 0 20 -0.1306 0.0305
0 1 0 -55.5524 0.2012
0 1 1 -91.3077 0.2301
0 1 2 -72.7620 -0.1734
0 1 3 -8.8571 -0.2055
0 1 4 36.2880 0.0673
0 1 5 34.0459 0.0576
0 1 6 13.5882 -0.0700
0 1 7 1.9421 0.0252
0 1 8 -0.1332 0.0993
0 1 9 1.5056 -0.0023
0 1 10 1.9208 -0.0339
0 1 11 0.2269 0.0319
0 1 12 -0.7899 0.0027
0 1 13 -1.9493 -0.0514
0 1 14 -4.5838 -0.0093
0 1 15 -6.0961 0.0102
0 1 16 -3.5896 -0.0167
0 1 17 0.5845 0.0080
0 1 18 0.7112 0.0161
0 1 19 -0.9535 -0.0055
0 1 20 0.4200 0.0243
0 2 0 26.2157 0.6594
0 2 1 1.9173 0.1216
0 2 2 -5.0056 -0.2980
0 2 3 2.0513 -0.0843
0 2 4 1.4950 0.0857
0 2 5 -8.0468 -0.0649
0 2 6 -12.1984 -0.0517
0 2 7 -6.3732 0.0878
0 2 8 3.0010 0.0159
0 2 9 7.6377 -0.0727
0 2 10 5.2551 0.0054
0 2 11 1.8638 0.0339
0 2 12 0.6949 -0.0385
0 2 13 -0.1130 -0.0255
0 2 14 -0.3078 0.0346
0 2 15 0.4318 0.0061
0 2 16 1.4444 -0.0158
0 2 17 1.6150 0.0206
0 2 18 0.0779 0.0054
0 2 19 -0.1768 -0.0166
0 2 20 0.6022 0.0125
0 3 0 0.1598 -0.0081
0 3 1 -12.1814 -0.4567
0 3 2 1.7657 -0.2048
0 3 3 19.6195 0.1927
0 3 4 17.5603 0.0727
0 3 5 2.0696 -0.0928
0 3 6 -7.5968 0.0471
0 3 7 -6.5727 0.0661
0 3 8 -4.0594 -0.0683
0 3 9 -6.1463 -0.0278
0 3 10 -7.6006 0.0493
0 3 11 -4.8609 -0.0163
0 3 12 -2.5175 -0.0449
0 3 13 -0.7219 0.0267
0 3 14 2.6066 0.0349
0 3 15 3.7793 -0.0163
0 3 16 1.9304 0.0048
0 3 17 -0.3311 0.0338
0 3 18 -1.6250 -0.0153
0 3 19 -0.7051 -0.0321
0 3 20 -0.1768 -0.0016
0 4 0 -25.6299 -0.4897
0 4 1 -23.3885 -0.3258
0 4 2 -4.5460 0.1695
0 4 3 9.3259 0.2046
0 4 4 8.5851 -0.0555
0 4 5 2.6294 -0.0021
0 4 6 2.4772 0.1043
0 4 7 7.3789 -0.0383
0 4 8 9.0018 -0.0732
0 4 9 5.6872 0.0408
0 4 10 2.8352 0.0100
0 4 11 0.6000 -0.0528
0 4 12 -1.9255 0.0065
0 4 13 -1.8564 0.0354
0 4 14 -2.3686 -0.0246
0 4 15 -5.6686 -0.0369
0 4 16 -5.1797 0.0171
0 4 17 -0.2065 0.0120
0 4 18 3.6542 -0.0343
0 4 19 4.3976 -0.0125
0 4 20 1.5363 0.0123
0 5 0 -9.2546 -0.2131
0 5 1 -4.9337 0.2686
0 5 2 3.1690 0.3408
0 5 3 2.5018 -0.0381
0 5 4 -5.7502 -0.1525
0 5 5 -11.0522 0.0381
0 5 6 -7.6516 0.0042
0 5 7 -1.4341 -0.0950
0 5 8 -0.5685 0.0216
0 5 9 -2.6248 0.0542
0 5 10 -2.3172 -0.0451
0 5 11 -0.9113 -0.0151
0 5 12 1.6269 0.0477
0 5 13 4.8208 0.0062
0 5 14 3.9736 -0.0216
0 5 15 1.3606 0.0129
0 5 16 1.0884 0.0171
0 5 17 0.1352 -0.0256
0 5 18 -0.6887 -0.0202
0 5 19 0.6889 0.0303
0 5 20 0.7855 0.0274
0 6 0 1.2377 0.3178
0 6 1 10.3102 0.3928
0 6 2 16.9092 -0.0172
0 6 3 14.2499 -0.2489
0 6 4 5.8551 -0.0375
0 6 5 -0.8804 0.0534
0 6 6 -1.6269 -0.0898
0 6 7 -0.1381 -0.0258
0 6 8 -1.6027 0.0950
0 6 9 -3.8868 -0.0026
0 6 10 -4.1388 -0.0361
0 6 11 -2.5364 0.0510
0 6 12 0.2670 0.0156
0 6 13 0.2386 -0.0479
0 6 14 -2.8338 -0.0074
0 6 15 -2.1450 0.0254
0 6 16 1.4254 -0.0037
0 6 17 2.8314 -0.0162
0 6 18 3.2472 0.0161
0 6 19 1.1468 0.0173
0 6 20 -3.5958 -0.0054
0 7 0 -8.0401 0.3225
0 7 1 -3.1716 -0.1003
0 7 2 -2.0754 -0.3563
0 7 3 -4.3250 -0.0992
0 7 4 -6.1390 0.1379
0 7 5 -3.6871 0.0048
0 7 6 3.3592 -0.0456
0 7 7 7.5680 0.1023
0 7 8 4.7142 0.0436
0 7 9 0.5575 -0.0791
0 7 10 -0.1380 0.0066
0 7 11 1.6660 0.0375
0 7 12 2.1961 -0.0477
0 7 13 -0.5424 -0.0229
0 7 14 -1.5663 0.0286
0 7 15 0.8684 -0.0082
0 7 16 0.7924 -0.0257
0 7 17 -0.2395 0.0231
0 7 18 1.3699 0.0408
0 7 19 0.4241 -0.0148
0 7 20 -2.2345 -0.0245
0 8 0 3.8743 -0.1257
0 8 1 4.0399 -0.3903
0 8 2 1.9114 -0.1317
0 8 3 -1.0652 0.1969
0 8 4 -3.8123 0.1024
0 8 5 -3.1913 -0.0573
0 8 6 -0.1344 0.0621
0 8 7 -0.6769 0.0887
0 8 8 -3.9393 -0.0721
0 8 9 -4.2502 -0.0402
0 8 10 -1.4029 0.0580
0 8 11 1.3041 -0.0285
0 8 12 1.2711 -0.0556
0 8 13 0.3911 0.0343
0 8 14 2.2115 0.0298
0 8 15 2.4238 -0.0096
0 8 16 -1.0929 0.0189
0 8 17 -1.1536 0.0442
0 8 18 0.8783 0.0053
0 8 19 -0.7835 -0.0317
0 9 0 -0.8087 -0.3616
0 9 1 1.4543 -0.1034
0 9 2 2.3647 0.2835
0 9 3 1.4205 0.2080
0 9 4 0.2248 -0.0804
0 9 5 1.3501 -0.0475
0 9 6 2.0624 0.0690
0 9 7 -0.4701 -0.0560
0 9 8 -2.9552 -0.0959
0 9 9 -2.8253 0.0453
0 9 10 -0.6114 0.0218
0 9 11 1.7582 -0.0608
0 9 12 1.3177 0.0194
0 9 13 -0.0379 0.0501
0 9 14 0.2028 -0.0139
0 9 15 -0.6979 -0.0043
0 9 16 -0.5132 0.0246
0 9 17 2.8227 -0.0008
0 9 18 1.6213 -0.0486
0 9 19 -3.7059 -0.0403
0 10 0 -0.8416 -0.0800
0 10 1 -1.2936 0.3016
0 10 2 -2.2707 0.2627
0 10 3 -2.7651 -0.0980
0 10 4 -0.9940 -0.1563
0 10 5 2.5408 0.0337
0 10 6 3.9258 -0.0057
0 10 7 2.5640 -0.1022
0 10 8 0.9120 0.0265
0 10 9 0.4144 0.0711
0 10 10 1.9797 -0.0533
0 10 11 2.5832 -0.0196
0 10 12 -0.2636 0.0675
0 10 13 -1.2107 -0.0012
0 10 14 0.6624 -0.0311
0 10 15 -0.1510 0.0131
0 10 16 -1.6211 -0.0029
0 10 17 -1.7667 -0.0254
0 10 18 -3.0269 -0.0277
0 10 19 -1.7145 0.0037
0 11 0 0.2737 0.2946
0 11 1 0.2468 0.2630
0 11 2 0.3248 -0.1253
0 11 3 0.4007 -0.2619
0 11 4 0.6295 -0.0096
0 11 5 -0.6217 0.0729
0 11 6 -3.8443 -0.0699
0 11 7 -5.4333 -0.0113
0 11 8 -3.9666 0.1058
0 11 9 -1.0123 0.0039
0 11 10 1.5621 -0.0394
0 11 11 0.5177 0.0641
0 11 12 -1.8001 0.0224
0 11 13 0.2308 -0.0566
0 11 14 2.0744 0.0098
0 11 15 -0.1565 0.0194
0 11 16 -0.2827 -0.0304
0 11 17 1.9235 0.0029
0 11 18 2.1192 0.0218
0 12 0 -1.1524 0.2145
0 12 1 0.7617 -0.1388
0 12 2 1.0871 -0.2989
0 12 3 1.5030 -0.0428
0 12 4 2.8382 0.1453
0 12 5 1.9774 0.0057
0 12 6 -0.3839 -0.0251
0 12 7 -0.6742 0.1200
0 12 8 -0.2626 0.0506
0 12 9 -0.2273 -0.0869
0 12 10 0.5810 -0.0015
0 12 11 0.7366 0.0456
0 12 12 0.9200 -0.0599
0 12 13 1.8833 -0.0382
0 12 14 0.2101 0.0354
0 12 15 -1.7596 -0.0232
0 12 16 0.0800 -0.0265
0 12 17 1.0605 0.0297
0 12 18 -0.7626 -0.0013
0 13 0 -1.0603 -0.1563
0 13 1 -3.1393 -0.2999
0 13 2 -2.2617 -0.0478
0 13 3 1.7905 0.2113
0 13 4 2.4395 0.0915
0 13 5 -1.9837 -0.0729
0 13 6 -3.1340 0.0300
0 13 7 1.2582 0.0531
0 13 8 3.8940 -0.0907
0 13 9 3.2782 -0.0526
0 13 10 1.9869 0.0551
0 13 11 -0.6621 -0.0272
0 13 12 -2.5865 -0.0691
0 13 13 -1.7424 0.0415
0 13 14 -0.6112 0.0363
0 13 15 0.3803 -0.0369
0 13 16 0.8561 0.0328
0 13 17 -1.0918 0.0647
0 14 0 0.7224 -0.2761
0 14 1 4.0525 -0.0275
0 14 2 6.6047 0.2358
0 14 3 4.5462 0.1344
0 14 4 -1.7815 -0.0920
0 14 5 -5.6332 -0.0314
0 14 6 -2.7620 0.0710
0 14 7 0.4833 -0.0638
0 14 8 -0.9066 -0.0992
0 14 9 -2.0715 0.0509
0 14 10 -0.6582 0.0421
0 14 11 0.5149 -0.0512
0 14 12 2.0885 0.0141
0 14 13 3.8014 0.0678
0 14 14 2.7699 -0.0139
0 14 15 0.3035 -0.0269
0 14 16 -1.0870 0.0391
0 15 0 0.6290 0.0037
0 15 1 -0.3053 0.2624
0 15 2 -0.4436 0.1653
0 15 3 -0.4583 -0.1068
0 15 4 -1.5352 -0.1259
0 15 5 -1.2449 0.0195
0 15 6 1.7795 -0.0298
0 15 7 2.6850 -0.0913
0 15 8 -0.2477 0.0506
0 15 9 -1.7781 0.0834
0 15 10 -0.5966 -0.0361
0 15 11 -0.2256 -0.0039
0 15 12 -1.1014 0.0776
0 15 13 -1.8362 0.0108
0 15 14 -1.6755 -0.0448
0 15 15 -0.0949 0.0222
0 16 0 -1.9609 0.2282
0 16 1 0.1856 0.1426
0 16 2 1.2203 -0.1295
0 16 3 -0.5026 -0.1744
0 16 4 -2.6086 0.0207
0 16 5 -1.1220 0.0587
0 16 6 1.9675 -0.0615
0 16 7 1.3720 0.0051
0 16 8 -0.7436 0.1099
0 16 9 0.8350 0.0155
0 16 10 3.1236 -0.0203
0 16 11 1.7318 0.0518
0 16 12 -0.0675 0.0061
0 16 13 0.4173 -0.0526
0 16 14 0.2274 -0.0262
0 17 0 1.4066 0.1457
0 17 1 1.3904 -0.1374
0 17 2 0.7058 -0.2195
0 17 3 0.2740 -0.0110
0 17 4 -0.6822 0.0996
0 17 5 -1.6394 -0.0295
0 17 6 -1.3791 -0.0354
0 17 7 -0.6839 0.1126
0 17 8 -0.0411 0.0464
0 17 9 0.9638 -0.0869
0 17 10 0.8380 -0.0054
0 17 11 -0.8019 0.0264
0 17 12 -1.1246 -0.0679
0 18 0 -2.0269 -0.1347
0 18 1 -1.2817 -0.1884
0 18 2 0.8619 0.0210
0 18 3 1.4953 0.1554
0 18 4 -0.2063 0.0347
0 18 5 0.4687 -0.0463
0 18 6 2.8030 0.0684
0 18 7 0.8654 0.0620
0 18 8 -3.3989 -0.0890
0 18 9 -3.2632 -0.0332
0 18 10 -0.6740 0.0744
0 19 0 -0.0796 -0.1798
0 19 1 0.8750 -0.0054
0 19 2 1.0871 0.1441
0 19 3 -1.4556 0.0663
0 19 4 -2.9524 -0.0568
0 19 5 -1.1720 -0.0063
0 19 6 0.3165 0.0521
0 19 7 -0.0049 -0.0418
1 -19 0 0.2749 -0.2618
1 -18 0 3.2545 -0.1295
1 -18 1 3.2419 0.1366
1 -18 2 1.7042 0.1646
1 -18 3 1.0551 0.0020
1 -18 4 -0.4446 -0.0310
1 -17 0 2.2556 0.1931
1 -17 1 0.1109 0.2183
1 -17 2 -4.2488 -0.0433
1 -17 3 -4.8977 -0.1391
1 -17 4 -2.4084 -0.0069
1 -17 5 0.8952 0.0410
1 -17 6 3.4561 -0.0159
1 -16 0 1.2528 0.2264
1 -16 1 -1.1031 -0.0808
1 -16 2 -1.6933 -0.2030
1 -16 3 0.4863 -0.0169
1 -16 4 -0.5410 0.0904
1 -16 5 -1.5522 0.0091
1 -16 6 1.3299 -0.0251
1 -16 7 2.6422 0.0088
1 -16 8 0.6170 -0.0025
1 -15 0 3.6282 -0.0987
1 -15 1 -1.2003 -0.2892
1 -15 2 -1.1979 -0.0668
1 -15 3 -0.3571 0.1326
1 -15 4 -1.5125 0.0500
1 -15 5 0.7994 -0.0255
1 -15 6 3.7312 0.0240
1 -15 7 0.9624 0.0243
1 -15 8 -2.6024 -0.0175
1 -15 9 -2.0849 0.0136
1 -15 10 -0.3334 0.0367
1 -14 0 -2.2420 -0.3332
1 -14 1 -0.3362 -0.0858
1 -14 2 3.0267 0.2182
1 -14 3 2.4836 0.1165
1 -14 4 0.9237 -0.0583
1 -14 5 3.1830 -0.0091
1 -14 6 3.4653 0.0265
1 -14 7 -0.9007 -0.0402
1 -14 8 -3.0529 -0.0341
1 -14 9 -0.7890 0.0298
1 -14 10 1.7917 0.0197
1 -14 11 2.1466 -0.0162
1 -13 0 2.2357 -0.0931
1 -13 1 0.9826 0.2754
1 -13 2 -0.0355 0.2097
1 -13 3 -3.3728 -0.0804
1 -13 4 -4.3044 -0.0769
1 -13 5 -1.7363 0.0322
1 -13 6 -1.2679 -0.0242
1 -13 7 -2.0580 -0.0540
1 -13 8 -0.2232 0.0137
1 -13 9 1.7285 0.0260
1 -13 10 0.8645 -0.0120
1 -13 11 -0.8408 -0.0067
1 -13 12 -0.8680 0.0138
1 -12 0 1.0632 0.2921
1 -12 1 0.7844 0.2652
1 -12 2 -1.5589 -0.1022
1 -12 3 -3.5773 -0.1895
1 -12 4 -1.0420 0.0130
1 -12 5 1.8362 0.0280
1 -12 6 -0.1668 -0.0559
1 -12 7 -3.4964 0.0124
1 -12 8 -3.1825 0.0707
1 -12 9 -0.0806 0.0249
1 -12 10 1.9257 -0.0044
1 -12 11 1.0673 0.0035
1 -12 12 -0.9207 -0.0104
1 -12 13 -1.8225 -0.0493
1 -11 0 -0.8521 0.2775
1 -11 1 -0.6633 -0.1254
1 -11 2 -0.3190 -0.2985
1 -11 3 1.2429 -0.0416
1 -11 4 3.4603 0.0991
1 -11 5 3.1770 -0.0174
1 -11 6 0.9399 -0.0040
1 -11 7 0.7782 0.0811
1 -11 8 2.8429 0.0131
1 -11 9 2.7604 -0.0497
1 -11 10 -0.7621 -0.0114
1 -11 11 -2.4970 0.0050
1 -11 12 0.3343 -0.0247
1 -11 13 2.8849 -0.0355
1 -11 14 1.6409 -0.0009
1 -10 0 -2.2015 -0.1812
1 -10 1 -3.1235 -0.3539
1 -10 2 -3.9010 -0.0588
1 -10 3 -3.2901 0.1894
1 -10 4 -1.9216 0.0610
1 -10 5 -2.3822 -0.0404
1 -10 6 -3.5333 0.0440
1 -10 7 -2.2165 0.0148
1 -10 8 0.8926 -0.0691
1 -10 9 2.2850 -0.0206
1 -10 10 1.6785 0.0156
1 -10 11 1.3207 -0.0229
1 -10 12 0.3649 -0.0231
1 -10 13 -1.5298 0.0062
1 -10 14 -1.2747 0.0236
1 -10 15 0.8720 0.0399
1 -9 0 4.4307 -0.3591
1 -9 1 3.9847 -0.0468
1 -9 2 2.3003 0.2757
1 -9 3 1.8126 0.1572
1 -9 4 1.2494 -0.0651
1 -9 5 -0.8138 -0.0247
1 -9 6 -1.5919 0.0168
1 -9 7 0.1607 -0.0661
1 -9 8 0.9762 -0.0419
1 -9 9 -1.2947 0.0279
1 -9 10 -3.3763 -0.0050
1 -9 11 -2.2563 -0.0194
1 -9 12 0.4459 0.0126
1 -9 13 2.5270 -0.0006
1 -9 14 2.3935 -0.0126
1 -9 15 -0.4115 -0.0031
1 -9 16 -2.1038 -0.0308
1 -8 0 -4.9138 -0.0185
1 -8 1 -4.5665 0.3458
1 -8 2 -3.0343 0.2130
1 -8 3 0.8642 -0.1195
1 -8 4 3.4031 -0.1189
1 -8 5 3.6860 0.0218
1 -8 6 4.4820 -0.0250
1 -8 7 5.0758 -0.0536
1 -8 8 3.1291 0.0365
1 -8 9 0.4052 0.0384
1 -8 10 -0.1624 -0.0055
1 -8 11 0.4588 0.0247
1 -8 12 0.4670 0.0260
1 -8 13 0.1298 -0.0153
1 -8 14 -0.9134 -0.0016
1 -8 15 -1.9569 0.0217
1 -8 16 -0.8388 0.0058
1 -8 17 0.4424 0.0154
1 -7 0 7.7882 0.3707
1 -7 1 2.1338 0.2280
1 -7 2 -2.2352 -0.1837
1 -7 3 -2.5223 -0.2346
1 -7 4 -3.0002 -0.0082
1 -7 5 -4.7969 0.0125
1 -7 6 -4.9977 -0.0592
1 -7 7 -3.6925 0.0325
1 -7 8 -2.4826 0.0800
1 -7 9 -1.0328 -0.0012
1 -7 10 0.5805 -0.0047
1 -7 11 1.7749 0.0391
1 -7 12 3.1884 0.0028
1 -7 13 3.6491 -0.0260
1 -7 14 1.3593 0.0074
1 -7 15 -0.5992 0.0172
1 -7 16 0.5061 -0.0007
1 -7 17 1.5615 0.0194
1 -6 0 2.9645 0.2269
1 -6 1 -1.5628 -0.2295
1 -6 2 1.0888 -0.3185
1 -6 3 8.1572 0.0050
1 -6 4 8.7426 0.1299
1 -6 5 4.1866 -0.0073
1 -6 6 1.8718 0.0086
1 -6 7 0.8477 0.0905
1 -6 8 -1.2904 0.0084
1 -6 9 -2.2315 -0.0413
1 -6 10 -1.5633 0.0224
1 -6 11 -0.7415 0.0083
1 -6 12 0.0495 -0.0589
1 -6 13 -0.6480 -0.0370
1 -6 14 -2.9006 0.0223
1 -6 15 -3.3819 0.0255
1 -6 16 -1.9317 0.0115
1 -6 17 -1.4662 0.0236
1 -6 18 -1.8237 0.0129
1 -5 0 -8.7587 -0.2608
1 -5 1 -12.9538 -0.3435
1 -5 2 -6.3655 0.0354
1 -5 3 0.2370 0.2568
1 -5 4 -1.3686 0.0666
1 -5 5 -3.2711 -0.0354
1 -5 6 -0.5274 0.0719
1 -5 7 1.6418 0.0283
1 -5 8 2.3460 -0.0774
1 -5 9 3.0658 -0.0160
1 -5 10 1.5612 0.0301
1 -5 11 -0.0342 -0.0295
1 -5 12 1.2540 -0.0322
1 -5 13 1.5726 0.0215
1 -5 14 -0.2522 0.0273
1 -5 15 0.0023 0.0030
1 -5 16 2.1165 0.0062
1 -5 17 2.5150 0.0158
1 -5 18 1.2530 -0.0046
1 -4 0 5.6985 -0.3624
1 -4 1 -3.1664 0.0627
1 -4 2 -0.2925 0.3532
1 -4 3 2.6197 0.1293
1 -4 4 -2.3027 -0.1163
1 -4 5 -7.1818 -0.0140
1 -4 6 -7.0523 0.0427
1 -4 7 -5.2281 -0.0821
1 -4 8 -2.8334 -0.0551
1 -4 9 -0.8736 0.0474
1 -4 10 0.2028 0.0034
1 -4 11 2.8419 -0.0305
1 -4 12 3.7545 0.0203
1 -4 13 -0.8043 0.0292
1 -4 14 -4.5456 0.0115
1 -4 15 -2.9892 0.0213
1 -4 16 -0.7775 0.0176
1 -4 17 -0.8953 -0.0199
1 -4 18 -1.1594 -0.0422
1 -4 19 -0.3703 -0.0253
1 -3 0 -8.7187 0.0996
1 -3 1 -6.4182 0.3757
1 -3 2 12.7221 0.1139
1 -3 3 22.3221 -0.2299
1 -3 4 13.5296 -0.1461
1 -3 5 4.6362 0.0284
1 -3 6 3.8376 -0.0692
1 -3 7 3.7277 -0.1017
1 -3 8 1.9644 0.0525
1 -3 9 -0.1683 0.0607
1 -3 10 -1.9892 -0.0200
1 -3 11 -2.2982 0.0168
1 -3 12 -2.2405 0.0329
1 -3 13 -1.4778 -0.0119
1 -3 14 1.2895 0.0002
1 -3 15 2.9842 0.0130
1 -3 16 2.0245 -0.0295
1 -3 17 0.6341 -0.0551
1 -3 18 -0.1909 -0.0263
1 -3 19 -0.5922 -0.0113
1 -2 0 -59.4771 0.5702
1 -2 1 -35.2161 0.2235
1 -2 2 -3.9001 -0.2673
1 -2 4 -13.3297 0.0454
1 -2 5 -13.9905 0.0262
1 -2 6 -4.2875 -0.0843
1 -2 7 1.7257 0.0403
1 -2 8 4.0077 0.1030
1 -2 9 4.1104 -0.0162
1 -2 10 2.5373 -0.0158
1 -2 11 1.8842 0.0461
1 -2 12 1.1370 -0.0148
1 -2 13 -0.9269 -0.0416
1 -2 14 -2.6368 0.0070
1 -2 15 -2.3491 -0.0039
1 -2 16 -0.4767 -0.0328
1 -2 17 0.0057 -0.0096
1 -2 18 -0.9527 0.0205
1 -2 19 -0.6227 0.0038
1 -1 0 54.9147 0.0097
1 -1 1 54.1265 -0.4551
1 -1 2 41.6065 -0.3285
1 -1 3 10.1677 0.1135
1 -1 4 -13.8919 0.1714
1 -1 5 -13.3294 -0.0289
1 -1 6 -5.2264 0.0128
1 -1 7 -2.5249 0.1314
1 -1 8 -2.2612 0.0233
1 -1 9 -3.4030 -0.0508
1 -1 10 -4.0994 0.0328
1 -1 11 -2.0753 0.0061
1 -1 12 0.0678 -0.0757
1 -1 13 0.8662 -0.0236
1 -1 14 1.5180 0.0201
1 -1 15 2.9019 -0.0122
1 -1 16 3.8801 -0.0110
1 -1 17 2.6808 0.0088
1 -1 18 0.9389 0.0040
1 -1 19 -0.4547 -0.0159
1 -1 20 -2.0831 -0.0051
1 0 0 -100.5694 -0.3590
1 0 1 -39.7266 -0.4143
1 0 2 10.4758 0.0315
1 0 3 14.1212 0.2012
1 0 4 5.5127 -0.0134
1 0 5 9.8091 -0.0535
1 0 6 13.4440 0.0939
1 0 7 9.3423 0.0439
1 0 8 3.3982 -0.0770
1 0 9 -1.4748 -0.0077
1 0 10 -2.6400 0.0367
1 0 11 -0.6012 -0.0561
1 0 12 0.1838 -0.0427
1 0 13 -1.0795 0.0467
1 0 14 -1.1876 0.0272
1 0 15 0.9214 -0.0056
1 0 16 0.4621 0.0066
1 0 17 -4.3068 -0.0070
1 0 18 -6.6429 -0.0159
1 0 19 -3.5380 -0.0063
1 0 20 1.6609 0.0168
1 1 0 59.9048 -0.3034
1 1 1 80.9894 0.0751
1 1 2 28.6329 0.3651
1 1 3 -36.9735 0.1096
1 1 4 -47.4010 -0.1090
1 1 5 -19.5185 0.0190
1 1 6 -0.5728 0.0590
1 1 7 2.6012 -0.0786
1 1 8 1.7620 -0.0614
1 1 9 1.5034 0.0419
1 1 10 3.3669 -0.0063
1 1 11 5.2247 -0.0482
1 1 12 4.4000 0.0337
1 1 13 3.0961 0.0466
1 1 14 3.9569 -0.0075
1 1 15 3.8885 0.0122
1 1 16 -0.7059 0.0199
1 1 17 -3.7970 -0.0151
1 1 18 -0.2008 -0.0053
1 1 19 3.2104 0.0071
1 1 20 2.3514 0.0163
1 2 0 31.3082 -0.3154
1 2 1 16.1205 0.2428
1 2 2 -16.8074 0.2600
1 2 3 -21.1452 -0.0409
1 2 4 3.6301 -0.0080
1 2 5 16.7183 0.0944
1 2 6 6.8011 -0.0475
1 2 7 -5.6251 -0.0959
1 2 8 -10.0436 0.0398
1 2 9 -7.8310 0.0471
1 2 10 -2.6866 -0.0389
1 2 11 -0.0835 0.0028
1 2 12 -0.8942 0.0521
1 2 13 -1.3777 -0.0132
1 2 14 -0.6982 -0.0315
1 2 15 -1.9109 0.0112
1 2 16 -4.0448 -0.0180
1 2 17 -2.0205 -0.0339
1 2 18 1.1452 0.0135
1 2 19 0.3849 0.0213
1 2 20 0.2478 0.0194
1 3 0 2.9726 0.3259
1 3 1 -9.4156 0.4483
1 3 2 -22.8167 -0.0554
1 3 3 -11.4536 -0.2329
1 3 4 11.0802 0.0086
1 3 5 18.5956 0.0160
1 3 6 12.1763 -0.0910
1 3 7 6.0581 0.0196
1 3 8 5.6305 0.0789
1 3 9 7.7852 -0.0250
1 3 10 6.4456 -0.0294
1 3 11 1.3652 0.0459
1 3 12 -1.8031 0.0074
1 3 13 -1.6399 -0.0481
1 3 14 -1.6972 0.0024
1 3 15 -3.4824 0.0203
1 3 16 -3.3010 -0.0301
1 3 17 0.2892 -0.0065
1 3 18 1.9975 0.0346
1 3 19 1.7075 0.0065
1 3 20 2.7597 -0.0046
1 4 0 15.9308 0.5529
1 4 1 -6.0205 0.0509
1 4 2 -19.6593 -0.3186
1 4 3 -13.5035 -0.0764
1 4 4 -3.7225 0.0643
1 4 5 -3.4203 -0.1042
1 4 6 -7.5503 -0.0557
1 4 7 -7.6357 0.0953
1 4 8 -2.8608 0.0210
1 4 9 0.8661 -0.0381
1 4 10 0.4686 0.0392
1 4 11 0.0950 0.0307
1 4 12 1.4661 -0.0506
1 4 13 1.9540 -0.0290
1 4 14 1.2607 0.0351
1 4 15 0.8923 0.0111
1 4 16 1.6016 -0.0161
1 4 17 1.1663 0.0178
1 4 18 -1.6046 0.0063
1 4 19 -1.8051 -0.0320
1 4 20 0.4052 -0.0145
1 5 0 8.9761 -0.0200
1 5 1 -0.4831 -0.4590
1 5 2 1.9774 -0.1960
1 5 3 13.0854 0.1825
1 5 4 17.5439 0.0605
1 5 5 9.3399 -0.0558
1 5 6 -2.5651 0.0859
1 5 7 -6.3181 0.0576
1 5 8 -2.5407 -0.0650
1 5 9 -1.1083 -0.0042
1 5 10 -3.3603 0.0365
1 5 11 -3.8166 -0.0387
1 5 12 -2.5945 -0.0441
1 5 13 -1.7282 0.0181
1 5 14 -1.1278 0.0194
1 5 15 -0.3582 -0.0170
1 5 16 1.0374 -0.0020
1 5 17 1.1178 0.0179
1 5 18 -0.1403 -0.0115
1 5 19 0.4500 -0.0153
1 5 20 0.3227 0.0068
1 6 0 -11.8348 -0.5097
1 6 1 -17.4971 -0.2743
1 6 2 -12.0400 0.2252
1 6 3 -1.0395 0.1850
1 6 4 4.8257 -0.0740
1 6 5 2.5364 0.0271
1 6 6 0.3000 0.1075
1 6 7 4.4972 -0.0554
1 6 8 8.5026 -0.0648
1 6 9 6.1232 0.0313
1 6 10 2.3487 -0.0204
1 6 11 0.6211 -0.0521
1 6 12 -0.8801 0.0143
1 6 13 -1.7021 0.0285
1 6 14 -1.7381 -0.0079
1 6 15 -1.7928 -0.0100
1 6 16 -1.9974 0.0071
1 6 17 -2.7134 -0.0080
1 6 18 -0.9040 -0.0166
1 6 19 3.7300 0.0098
1 6 20 4.3515 0.0052
1 7 0 -1.9981 -0.2111
1 7 1 -3.3510 0.3305
1 7 2 2.3377 0.3407
1 7 3 6.4137 -0.0706
1 7 4 2.1160 -0.1137
1 7 5 -6.5238 0.0674
1 7 6 -8.8831 -0.0364
1 7 7 -3.9705 -0.1121
1 7 8 -1.2498 0.0369
1 7 9 -2.8894 0.0460
1 7 10 -3.5485 -0.0370
1 7 11 -1.9974 0.0179
1 7 12 0.9796 0.0465
1 7 13 3.7086 -0.0136
1 7 14 3.5843 -0.0142
1 7 15 2.6464 0.0263
1 7 16 2.4839 0.0112
1 7 17 1.5322 -0.0229
1 7 18 1.0941 0.0061
1 7 19 0.5133 0.0293
1 7 20 -1.8034 -0.0032
1 8 0 -2.0364 0.3625
1 8 1 2.2428 0.4040
1 8 2 6.7037 -0.0750
1 8 3 6.5596 -0.2374
1 8 4 1.4350 0.0214
1 8 5 -3.1053 0.0274
1 8 6 -1.3912 -0.1330
1 8 7 2.7601 -0.0115
1 8 8 2.9664 0.0905
1 8 9 0.8504 -0.0241
1 8 10 -0.3681 -0.0179
1 8 11 -0.2621 0.0608
1 8 12 0.5092 -0.0061
1 8 13 -1.0619 -0.0483
1 8 14 -3.7986 0.0121
1 8 15 -2.7055 0.0252
1 8 16 -0.2676 -0.0169
1 8 17 0.2133 -0.0059
1 8 18 0.9476 0.0334
1 8 19 0.6791 -0.0160
1 8 20 -1.3309 -0.0417
1 9 0 -2.4285 0.3751
1 9 1 -0.7536 -0.1093
1 9 2 0.9437 -0.3741
1 9 3 0.7463 -0.0587
1 9 4 -1.3539 0.1256
1 9 5 -0.9139 -0.0541
1 9 6 3.2851 -0.0362
1 9 7 4.9823 0.1236
1 9 8 2.0263 0.0239
1 9 9 -1.1294 -0.0606
1 9 10 -2.3462 0.0484
1 9 11 -1.7208 0.0319
1 9 12 -0.8495 -0.0630
1 9 13 -1.2259 -0.0144
1 9 14 0.5464 0.0345
1 9 15 3.7467 -0.0124
1 9 16 1.9561 -0.0376
1 9 17 -1.8996 0.0091
1 9 18 -1.8923 0.0272
1 9 19 -0.4733 -0.0262
1 10 0 0.3245 -0.1053
1 10 1 -0.3359 -0.4248
1 10 2 -0.8673 -0.1107
1 10 3 -3.0504 0.2229
1 10 4 -5.2812 0.0519
1 10 5 -3.6281 -0.0771
1 10 6 -0.8600 0.0948
1 10 7 -1.0870 0.0809
1 10 8 -1.4161 -0.0761
1 10 9 -0.4167 -0.0021
1 10 10 -0.1359 0.0617
1 10 11 0.7630 -0.0524
1 10 12 2.1400 -0.0534
1 10 13 2.0376 0.0339
1 10 14 1.5698 0.0149
1 10 15 -0.0190 -0.0177
1 10 16 -2.0444 0.0086
1 10 17 0.0473 0.0389
1 10 18 3.1967 0.0127
1 10 19 2.3170 -0.0212
1 11 0 -2.2116 -0.3932
1 11 1 0.4702 -0.1417
1 11 2 2.5568 0.2924
1 11 3 1.7775 0.1793
1 11 4 1.8115 -0.1028
1 11 5 3.8770 0.0052
1 11 6 3.3671 0.0982
1 11 7 0.8098 -0.0711
1 11 8 -0.2664 -0.0795
1 11 9 -1.7133 0.0473
1 11 10 -2.6864 -0.0182
1 11 11 -0.0243 -0.0685
1 11 12 1.6341 0.0327
1 11 13 -0.5875 0.0317
1 11 14 -1.9848 -0.0301
1 11 15 -1.3018 0.0044
1 11 16 -0.1069 0.0364
1 11 17 0.5243 0.0164
1 11 18 -1.2444 -0.0328
1 11 19 -2.6526 -0.0398
1 12 0 -0.8066 -0.1209
1 12 1 -1.3196 0.3114
1 12 2 -2.4213 0.2609
1 12 3 -2.8185 -0.1241
1 12 4 -0.3573 -0.1143
1 12 5 1.8167 0.0824
1 12 6 0.7444 -0.0377
1 12 7 0.1322 -0.1339
1 12 8 0.9523 0.0267
1 12 9 0.1776 0.0581
1 12 10 -0.1988 -0.0425
1 12 11 0.4457 0.0127
1 12 12 -1.4219 0.0555
1 12 13 -2.8912 -0.0216
1 12 14 -0.7041 -0.0028
1 12 15 0.8497 0.0420
1 12 16 0.0199 -0.0134
1 12 17 -0.8410 -0.0356
1 12 18 -0.6140 -0.0148
1 13 0 -1.6404 0.2809
1 13 1 1.0306 0.2860
1 13 2 2.4526 -0.1183
1 13 3 1.3792 -0.2278
1 13 4 1.2658 0.0346
1 13 5 0.5117 0.0467
1 13 6 -2.1331 -0.0993
1 13 7 -3.1014 0.0135
1 13 8 -2.5284 0.1018
1 13 9 -2.4048 -0.0243
1 13 10 -0.7777 -0.0257
1 13 11 1.7708 0.0781
1 13 12 2.3565 0.0125
1 13 13 2.0300 -0.0534
1 13 14 1.5822 0.0158
1 13 15 0.8784 0.0072
1 13 16 1.7255 -0.0496
1 13 17 3.2797 -0.0139
1 14 0 0.1117 0.2614
1 14 1 0.0157 -0.1131
1 14 2 -2.6569 -0.2946
1 14 3 -1.9221 -0.0078
1 14 4 2.1235 0.1438
1 14 5 2.2276 -0.0394
1 14 6 -0.4218 -0.0360
1 14 7 -0.0184 0.1093
1 14 8 1.0903 0.0241
1 14 9 0.0177 -0.0596
1 14 10 -0.3757 0.0327
1 14 11 -0.0510 0.0213
1 14 12 -1.4990 -0.0800
1 14 13 -3.0739 -0.0299
1 14 14 -2.3867 0.0343
1 14 15 -0.2344 -0.0315
1 14 16 0.7318 -0.0318
1 14 17 -0.9275 0.0428
1 15 0 -2.9384 -0.1117
1 15 1 -1.0544 -0.3183
1 15 2 0.9070 -0.0596
1 15 3 2.8394 0.1892
1 15 4 2.4544 0.0371
1 15 5 -0.9106 -0.0615
1 15 6 -2.3022 0.0857
1 15 7 -0.1662 0.0453
1 15 8 1.1662 -0.1040
1 15 9 0.6716 -0.0229
1 15 10 0.7126 0.0547
1 15 11 0.8024 -0.0384
1 15 12 0.2473 -0.0484
1 15 13 0.7937 0.0487
1 15 14 2.1914 0.0436
1 15 15 2.0413 -0.0128
1 15 16 0.1938 0.0219
1 16 0 3.0282 -0.2598
1 16 1 3.5580 -0.0342
1 16 2 1.4748 0.2418
1 16 3 0.6163 0.1153
1 16 4 0.1128 -0.0972
1 16 5 -1.7674 -0.0033
1 16 6 -2.2273 0.0518
1 16 7 -0.7044 -0.0942
1 16 8 -0.7487 -0.0706
1 16 9 -2.1516 0.0453
1 16 10 -0.9371 -0.0154
1 16 11 1.9123 -0.0473
1 16 12 1.9095 0.0393
1 16 13 -0.2273 0.0411
1 16 14 -0.6791 -0.0221
1 17 0 0.6437 -0.0524
1 17 1 -0.4364 0.2259
1 17 2 -1.8201 0.1534
1 17 3 -1.1055 -0.1105
1 17 4 -0.5093 -0.0739
1 17 5 -0.3956 0.0741
1 17 6 0.5996 -0.0368
1 17 7 1.1774 -0.1017
1 17 8 0.0012 0.0467
1 17 9 -0.7041 0.0583
1 17 10 0.3279 -0.0232
1 17 11 -0.2591 0.0303
1 17 12 -2.5394 0.0572
1 17 13 -1.5104 0.0113
1 18 0 1.0797 0.2412
1 18 1 -0.4534 0.1864
1 18 2 -1.7473 -0.1232
1 18 3 -0.5261 -0.1619
1 18 4 0.9896 0.0403
1 18 5 0.1191 0.0111
1 18 6 -1.3054 -0.1068
1 18 7 -0.1564 0.0285
1 18 8 1.9085 0.1060
1 18 9 2.2372 -0.0291
1 18 10 1.6681 -0.0156
1 18 11 0.8301 0.0748
1 19 0 0.5804 0.2009
1 19 1 -2.3220 -0.0862
1 19 2 -1.3550 -0.2043
1 19 3 2.3540 -0.0134
1 19 4 2.0081 0.0567
1 19 5 -1.7366 -0.0535
1 19 6 -2.3937 0.0124
1 19 7 -0.1984 0.1122
1 19 8 -0.8593 -0.0220
2 -18 0 -3.0992 -0.0807
2 -18 1 2.8898 -0.2586
2 -18 2 4.8188 -0.0918
2 -18 3 0.3873 0.0269
2 -17 0 -2.5092 -0.3008
2 -17 1 1.0265 -0.1223
2 -17 2 0.1458 0.1294
2 -17 3 -0.9029 0.0990
2 -17 4 -0.3695 0.0124
2 -17 5 -3.0172 0.0246
2 -17 6 -3.8621 0.0127
2 -16 0 3.2717 -0.1018
2 -16 1 5.2702 0.2248
2 -16 2 1.3917 0.1695
2 -16 3 -1.0826 -0.0440
2 -16 4 -1.4800 -0.0538
2 -16 5 -3.0788 0.0047
2 -16 6 -1.8720 -0.0148
2 -16 7 1.2310 -0.0150
2 -16 8 1.1490 -0.0056
2 -15 0 -0.9878 0.2839
2 -15 1 -0.1079 0.2397
2 -15 2 -1.2558 -0.0657
2 -15 3 1.2586 -0.1178
2 -15 4 2.1062 0.0049
2 -15 5 0.2369 0.0000
2 -15 6 2.0224 -0.0482
2 -15 7 4.1698 -0.0142
2 -15 8 1.7626 0.0083
2 -15 9 -1.1091 -0.0025
2 -15 10 -1.1690 0.0292
2 -14 0 4.3990 0.2871
2 -14 1 1.2149 -0.1211
2 -14 2 -1.5196 -0.2525
2 -14 3 -1.4052 -0.0289
2 -14 4 -3.5782 0.0493
2 -14 5 -4.3301 -0.0358
2 -14 6 -0.2449 -0.0167
2 -14 7 2.0899 0.0523
2 -14 8 0.4992 0.0371
2 -14 9 -0.6357 0.0069
2 -14 10 -0.4497 0.0238
2 -14 11 -0.5932 0.0183
2 -13 0 0.5874 -0.1498
2 -13 1 -1.0980 -0.3544
2 -13 2 0.3274 -0.0482
2 -13 3 1.8317 0.1493
2 -13 4 0.8084 0.0215
2 -13 5 2.2588 -0.0240
2 -13 6 4.3586 0.0541
2 -13 7 0.9827 0.0435
2 -13 8 -4.0618 -0.0100
2 -13 9 -3.9142 -0.0045
2 -13 10 0.2095 0.0117
2 -13 11 2.6597 -0.0134
2 -13 12 1.9933 -0.0276
2 -12 0 0.1670 -0.3905
2 -12 1 1.1863 -0.0732
2 -12 2 3.3246 0.2545
2 -12 3 2.1650 0.1084
2 -12 4 0.1797 -0.0601
2 -12 5 1.4365 0.0166
2 -12 6 1.6871 0.0437
2 -12 7 -0.7035 -0.0222
2 -12 8 -1.0693 -0.0303
2 -12 9 0.7285 -0.0080
2 -12 10 0.4037 -0.0018
2 -12 11 -2.0954 0.0048
2 -12 12 -2.6546 0.0172
2 -12 13 -1.2363 0.0142
2 -11 0 0.6173 -0.0853
2 -11 1 0.0501 0.3326
2 -11 2 -2.7265 0.2193
2 -11 3 -5.6588 -0.0912
2 -11 4 -3.5163 -0.0562
2 -11 5 0.3908 0.0370
2 -11 6 -0.1236 -0.0480
2 -11 7 -2.4488 -0.0686
2 -11 8 -2.1772 0.0007
2 -11 9 -0.0569 0.0169
2 -11 10 1.5795 0.0041
2 -11 11 1.8796 0.0049
2 -11 12 1.1541 0.0094
2 -11 13 -0.2790 0.0013
2 -11 14 -0.6557 -0.0191
2 -10 0 4.0446 0.3893
2 -10 1 2.0074 0.2854
2 -10 2 -0.4823 -0.1539
2 -10 3 -0.3815 -0.1907
2 -10 4 1.9658 0.0275
2 -10 5 1.3847 0.0029
2 -10 6 -1.8069 -0.0590
2 -10 7 -3.0430 0.0333
2 -10 8 -2.1734 0.0530
2 -10 9 -1.2620 -0.0035
2 -10 10 -1.1609 0.0073
2 -10 11 -1.3526 0.0251
2 -10 12 -0.7934 -0.0109
2 -10 13 0.0994 -0.0488
2 -10 14 0.9730 -0.0416
2 -10 15 1.4504 -0.0106
2 -9 0 -7.3462 0.2784
2 -9 1 -5.2406 -0.1990
2 -9 2 -3.1907 -0.3060
2 -9 3 0.6426 0.0102
2 -9 4 4.5192 0.0871
2 -9 5 4.5947 -0.0489
2 -9 6 2.4804 0.0056
2 -9 7 1.2782 0.0721
2 -9 8 1.4528 -0.0089
2 -9 9 2.3258 -0.0227
2 -9 10 2.1613 0.0248
2 -9 11 0.4066 -0.0073
2 -9 12 -1.4777 -0.0431
2 -9 13 -2.0412 -0.0173
2 -9 14 -0.6777 0.0035
2 -9 15 0.5560 -0.0075
2 -9 16 0.0512 -0.0064
2 -8 0 4.9006 -0.2307
2 -8 1 1.9512 -0.4169
2 -8 2 -1.9538 -0.0251
2 -8 3 -2.6815 0.2086
2 -8 4 -2.1135 0.0259
2 -8 5 -4.1192 -0.0341
2 -8 6 -6.2124 0.0688
2 -8 7 -4.8286 0.0086
2 -8 8 -1.1405 -0.0610
2 -8 9 1.2464 0.0016
2 -8 10 0.9255 0.0047
2 -8 11 0.0187 -0.0499
2 -8 12 0.4488 -0.0247
2 -8 13 2.1212 0.0213
2 -8 14 3.6038 0.0185
2 -8 15 3.0971 0.0166
2 -8 16 1.8276 0.0287
2 -8 17 1.4731 0.0214
2 -7 0 -0.3976 -0.4453
2 -7 1 1.3676 -0.0109
2 -7 2 2.3005 0.3465
2 -7 3 5.0370 0.1273
2 -7 4 5.9754 -0.0878
2 -7 5 3.1561 0.0232
2 -7 6 1.3839 0.0340
2 -7 7 2.1878 -0.0904
2 -7 8 1.7684 -0.0526
2 -7 9 -0.7055 0.0211
2 -7 10 -2.5231 -0.0175
2 -7 11 -2.8428 -0.0209
2 -7 12 -2.2420 0.0300
2 -7 13 -0.6485 0.0235
2 -7 14 0.2799 -0.0086
2 -7 15 -0.8737 -0.0016
2 -7 16 -1.7858 0.0117
2 -7 17 -1.5063 0.0107
2 -6 0 -1.6746 -0.0173
2 -6 1 -2.1988 0.4261
2 -6 2 -5.0857 0.2163
2 -6 3 -4.2172 -0.1570
2 -6 4 -1.4256 -0.0836
2 -6 5 -0.1599 0.0436
2 -6 6 1.0505 -0.0715
2 -6 7 2.5545 -0.0807
2 -6 8 2.6509 0.0435
2 -6 9 1.8087 0.0350
2 -6 10 0.6737 -0.0152
2 -6 11 -0.5447 0.0260
2 -6 12 0.1621 0.0479
2 -6 13 2.2731 0.0080
2 -6 14 2.2397 -0.0131
2 -6 15 1.1909 -0.0038
2 -6 16 2.0587 -0.0031
2 -6 17 2.4715 0.0004
2 -6 18 0.8348 0.0137
2 -5 0 13.3369 0.4508
2 -5 1 4.0615 0.2521
2 -5 2 -4.3182 -0.2449
2 -5 3 -2.3788 -0.2285
2 -5 4 1.2042 0.0493
2 -5 5 -1.0694 0.0044
2 -5 6 -3.7384 -0.0847
2 -5 7 -3.5771 0.0428
2 -5 8 -3.3677 0.0873
2 -5 9 -2.6101 0.0077
2 -5 10 -0.4393 0.0149
2 -5 11 1.4530 0.0444
2 -5 12 2.4466 0.0004
2 -5 13 1.6548 -0.0324
2 -5 14 -0.6796 -0.0090
2 -5 15 -1.5319 0.0174
2 -5 16 -1.2110 0.0180
2 -5 17 -1.9871 0.0179
2 -5 18 -2.3639 0.0154
2 -5 19 -1.3287 0.0045
2 -4 0 3.9585 0.2800
2 -4 1 -1.7258 -0.2655
2 -4 2 0.1480 -0.3505
2 -4 3 9.3622 0.0378
2 -4 4 11.5251 0.1196
2 -4 5 6.0740 -0.0571
2 -4 6 3.2052 0.0060
2 -4 7 2.1706 0.1007
2 -4 8 -0.2909 0.0021
2 -4 9 -1.3852 -0.0338
2 -4 10 -2.2756 0.0222
2 -4 11 -3.8168 -0.0008
2 -4 12 -2.2818 -0.0361
2 -4 13 0.7934 -0.0112
2 -4 14 1.9799 0.0073
2 -4 15 2.4082 -0.0041
2 -4 16 2.1685 0.0008
2 -4 17 0.5278 0.0291
2 -4 18 -1.2007 0.0257
2 -4 19 -1.7304 -0.0052
2 -3 0 -8.2533 -0.2839
2 -3 1 -18.1145 -0.3970
2 -3 2 -18.3160 0.0675
2 -3 3 -9.4113 0.2985
2 -3 4 -4.3862 0.0467
2 -3 5 -3.7601 -0.0306
2 -3 6 -1.5370 0.1073
2 -3 7 0.7579 0.0282
2 -3 8 2.7487 -0.0818
2 -3 9 4.5520 -0.0114
2 -3 10 3.1845 0.0025
2 -3 11 1.7830 -0.0570
2 -3 12 2.3629 -0.0287
2 -3 13 -0.0296 0.0125
2 -3 14 -3.4111 0.0003
2 -3 15 -2.8076 0.0050
2 -3 16 -1.2983 0.0406
2 -3 17 -1.0845 0.0374
2 -3 18 -0.0650 -0.0148
2 -3 19 1.7908 -0.0292
2 -2 0 29.9621 -0.4515
2 -2 1 6.1388 -0.0004
2 -2 2 2.3064 0.3518
2 -2 3 10.4128 0.1110
2 -2 4 8.0821 -0.1108
2 -2 5 -1.8926 0.0353
2 -2 6 -6.5842 0.0440
2 -2 7 -6.6721 -0.1188
2 -2 8 -5.9766 -0.0556
2 -2 9 -5.5671 0.0487
2 -2 10 -4.6619 -0.0201
2 -2 11 -0.8527 -0.0254
2 -2 12 2.0828 0.0521
2 -2 13 1.2556 0.0365
2 -2 14 1.7952 -0.0050
2 -2 15 3.2641 0.0100
2 -2 16 1.5244 0.0158
2 -2 17 -0.3870 -0.0252
2 -2 18 -0.4649 -0.0480
2 -2 19 -0.7615 -0.0180
2 -2 20 -1.4947 -0.0305
2 -1 0 -51.2874 0.1095
2 -1 1 -37.7806 0.4603
2 -1 2 -2.2757 0.1604
2 -1 3 21.6227 -0.2255
2 -1 4 18.2066 -0.1151
2 -1 5 8.1094 0.0370
2 -1 6 5.3995 -0.1097
2 -1 7 4.2655 -0.1229
2 -1 8 2.5638 0.0474
2 -1 9 1.7404 0.0262
2 -1 10 1.4469 -0.0430
2 -1 11 1.1252 0.0438
2 -1 12 -1.3792 0.0663
2 -1 13 -3.6280 -0.0112
2 -1 14 -2.1989 -0.0161
2 -1 15 -1.2660 0.0153
2 -1 16 -2.2732 0.0048
2 -1 17 -1.8949 -0.0157
2 -1 18 -0.7984 -0.0059
2 -1 19 0.1605 -0.0008
2 -1 20 1.0669 -0.0524
2 0 0 18.0152 0.4633
2 0 1 4.8865 0.2085
2 0 2 0.6771 -0.2179
2 0 3 -6.0512 -0.1542
2 0 4 -17.4241 0.0734
2 0 5 -18.6612 -0.0315
2 0 6 -9.6825 -0.1342
2 0 7 -1.3456 0.0376
2 0 8 3.3614 0.1038
2 0 9 4.5270 -0.0112
2 0 10 3.3353 0.0126
2 0 11 1.2487 0.0754
2 0 12 -1.1418 -0.0075
2 0 13 -0.2635 -0.0561
2 0 14 2.8505 -0.0140
2 0 15 2.8805 -0.0025
2 0 16 2.0697 -0.0064
2 0 17 3.1729 0.0006
2 0 18 3.2091 -0.0001
2 0 19 1.0178 -0.0198
2 0 20 -1.9925 -0.0409
2 1 0 -28.3318 0.1393
2 1 1 -16.7845 -0.3419
2 1 2 17.4788 -0.3171
2 1 3 28.2861 0.0363
2 1 4 11.6839 0.0716
2 1 5 -1.7636 -0.0652
2 1 6 -4.2012 0.0328
2 1 7 -4.9488 0.1369
2 1 8 -6.0653 0.0223
2 1 9 -6.1654 -0.0332
2 1 10 -5.1638 0.0439
2 1 11 -4.0682 0.0116
2 1 12 -2.2320 -0.0609
2 1 13 0.7703 -0.0228
2 1 14 0.5635 0.0024
2 1 15 -2.0846 -0.0152
2 1 16 -1.1298 0.0013
2 1 17 0.7477 0.0054
2 1 18 -0.6537 -0.0074
2 1 19 -2.0839 -0.0076
2 1 20 -0.9522 -0.0016
2 2 0 -32.4501 -0.2442
2 2 1 7.2549 -0.3580
2 2 2 29.2713 -0.0064
2 2 3 11.8102 0.1199
2 2 4 -8.0542 -0.0413
2 2 5 -3.4092 -0.0063
2 2 6 8.3780 0.1299
2 2 7 11.3831 0.0503
2 2 8 8.7181 -0.0541
2 2 9 4.6402 0.0068
2 2 10 0.8398 0.0275
2 2 11 -0.8915 -0.0498
2 2 12 0.2524 -0.0342
2 2 13 1.7505 0.0256
2 2 14 1.6703 0.0068
2 2 15 2.9395 0.0090
2 2 16 4.0007 0.0383
2 2 17 0.3089 0.0096
2 2 18 -3.3104 -0.0144
2 2 19 -2.3011 -0.0134
2 2 20 -0.3069 -0.0146
2 2 21 0.4682 0.0213
2 3 0 13.8321 -0.3994
2 3 1 23.5303 -0.0203
2 3 2 4.0496 0.2961
2 3 3 -26.1563 0.1181
2 3 4 -31.0287 -0.0197
2 3 5 -14.4039 0.0742
2 3 6 -2.3843 0.0287
2 3 7 -0.9248 -0.0944
2 3 8 -2.8297 -0.0415
2 3 9 -3.2005 0.0281
2 3 10 -0.3336 -0.0283
2 3 11 3.5168 -0.0382
2 3 12 4.9896 0.0359
2 3 13 3.4521 0.0239
2 3 14 1.6393 -0.0264
2 3 15 0.8567 0.0117
2 3 16 -1.6186 0.0288
2 3 17 -3.8035 -0.0161
2 3 18 -1.8252 -0.0169
2 3 19 -0.0967 -0.0034
2 3 20 -0.7628 -0.0020
2 3 21 0.2976 0.0249
2 4 0 12.0043 -0.1005
2 4 1 19.2490 0.3319
2 4 2 10.3821 0.1926
2 4 3 2.8756 -0.0808
2 4 4 7.5000 0.0204
2 4 5 10.7959 0.0794
2 4 6 4.4698 -0.0811
2 4 7 -3.6228 -0.0853
2 4 8 -6.3571 0.0270
2 4 9 -3.7512 0.0030
2 4 10 -0.6741 -0.0359
2 4 11 -0.8936 0.0312
2 4 12 -2.4090 0.0533
2 4 13 -2.3043 -0.0167
2 4 14 -0.9547 -0.0230
2 4 15 -0.8712 0.0218
2 4 16 -1.8257 -0.0087
2 4 17 -0.1583 -0.0336
2 4 18 2.1385 0.0077
2 4 19 1.1523 0.0165
2 4 20 0.8558 0.0067
2 4 21 2.1131 0.0130
2 5 0 -0.8541 0.3739
2 5 1 -3.7112 0.2927
2 5 2 -14.5922 -0.1497
2 5 3 -16.4908 -0.1647
2 5 4 -5.6667 0.0360
2 5 5 6.5869 -0.0477
2 5 6 11.5813 -0.0973
2 5 7 9.2861 0.0518
2 5 8 5.7286 0.0635
2 5 9 4.9031 -0.0224
2 5 10 3.8664 0.0153
2 5 11 1.0976 0.0587
2 5 12 -0.5942 -0.0041
2 5 13 -0.4577 -0.0471
2 5 14 -0.5052 -0.0054
2 5 15 -2.0376 0.0077
2 5 16 -2.8581 -0.0250
2 5 17 -1.4034 -0.0059
2 5 18 -0.8281 0.0169
2 5 19 -0.8467 -0.0104
2 5 20 1.2827 -0.0170
2 5 21 1.7735 -0.0162
2 6 0 9.6316 0.3605
2 6 1 2.6908 -0.1610
2 6 2 -4.8626 -0.2992
2 6 3 -5.2255 0.0209
2 6 4 -0.8168 0.0558
2 6 5 0.4394 -0.1105
2 6 6 -4.8259 -0.0078
2 6 7 -10.1094 0.0945
2 6 8 -7.7644 0.0033
2 6 9 -2.0638 -0.0077
2 6 10 -0.4823 0.0450
2 6 11 -0.4733 -0.0020
2 6 12 1.8426 -0.0513
2 6 13 3.7789 -0.0233
2 6 14 2.6013 0.0050
2 6 15 0.8081 -0.0062
2 6 16 2.2128 0.0017
2 6 17 3.8303 0.0246
2 6 18 1.0191 -0.0004
2 6 19 -2.1385 -0.0203
2 6 20 -1.9546 -0.0044
2 6 21 -1.2406 -0.0049
2 7 0 6.0164 -0.1999
2 7 1 1.9308 -0.4177
2 7 2 -2.1459 -0.0343
2 7 3 0.3965 0.1869
2 7 4 7.4279 -0.0160
2 7 5 8.7980 -0.0316
2 7 6 1.7068 0.1203
2 7 7 -3.0107 0.0301
2 7 8 0.1612 -0.0676
2 7 9 2.7822 0.0061
2 7 10 0.5862 0.0088
2 7 11 -1.6685 -0.0466
2 7 12 -2.4200 -0.0198
2 7 13 -3.2633 0.0122
2 7 14 -3.7463 -0.0058
2 7 15 -2.6218 -0.0113
2 7 16 -1.1875 0.0179
2 7 17 -2.2676 0.0179
2 7 18 -2.8624 -0.0071
2 7 19 1.2337 0.0071
2 7 20 4.5813 0.0054
2 8 0 -2.0252 -0.4746
2 8 1 -6.5735 -0.0854
2 8 2 -5.6355 0.2844
2 8 3 1.5919 0.0918
2 8 4 6.9736 -0.0810
2 8 5 3.3080 0.0877
2 8 6 -2.6853 0.0904
2 8 7 -1.2017 -0.0792
2 8 8 2.6896 -0.0417
2 8 9 0.9339 0.0200
2 8 10 -2.0855 -0.0474
2 8 11 -1.3632 -0.0328
2 8 12 0.5881 0.0361
2 8 13 1.4969 0.0188
2 8 14 1.7041 -0.0127
2 8 15 1.9670 0.0103
2 8 16 1.7850 0.0223
2 8 17 0.7649 -0.0204
2 8 18 1.1408 -0.0190
2 8 19 1.9013 0.0303
2 8 20 -0.1936 0.0016
2 9 0 -0.0567 -0.0628
2 9 1 -4.1738 0.3753
2 9 2 -3.9487 0.2120
2 9 3 -0.2197 -0.1267
2 9 4 -0.0069 -0.0327
2 9 5 -5.0737 0.0841
2 9 6 -6.8129 -0.0835
2 9 7 -2.0166 -0.1029
2 9 8 1.8909 0.0418
2 9 9 2.1935 0.0066
2 9 10 2.3263 -0.0447
2 9 11 2.5918 0.0370
2 9 12 2.6599 0.0486
2 9 13 2.5319 -0.0151
2 9 14 0.7782 -0.0146
2 9 15 -1.5193 0.0259
2 9 16 -2.2580 0.0166
2 9 17 -0.9890 -0.0172
2 9 18 1.2848 0.0137
2 9 19 1.2176 0.0110
2 9 20 -0.7513 -0.0516
2 10 0 -1.1026 0.3986
2 10 1 1.0778 0.2855
2 10 2 5.7677 -0.1649
2 10 3 8.3722 -0.1705
2 10 4 4.2329 0.0646
2 10 5 -1.6192 -0.0286
2 10 6 -1.2335 -0.1427
2 10 7 1.8529 0.0118
2 10 8 0.8916 0.0603
2 10 9 -1.7880 -0.0345
2 10 10 -2.5349 0.0221
2 10 11 -2.1043 0.0841
2 10 12 -1.8042 0.0053
2 10 13 -2.7104 -0.0382
2 10 14 -3.1238 -0.0014
2 10 15 -0.4325 0.0167
2 10 16 2.3083 -0.0144
2 10 17 1.9328 -0.0213
2 10 18 -0.2570 0.0233
2 10 19 -2.4215 -0.0117
2 11 0 0.0333 0.2847
2 11 1 -1.4551 -0.1846
2 11 2 -1.7032 -0.2977
2 11 3 -1.5759 0.0173
2 11 4 -2.9824 0.0614
2 11 5 -1.7776 -0.1001
2 11 6 2.5427 0.0093
2 11 7 3.5984 0.1325
2 11 8 1.3789 0.0116
2 11 9 0.8938 -0.0266
2 11 10 1.2097 0.0568
2 11 11 0.2858 0.0067
2 11 12 -0.0706 -0.0569
2 11 13 1.0446 -0.0108
2 11 14 2.5985 0.0145
2 11 15 2.1674 -0.0138
2 11 16 -0.9495 -0.0415
2 11 17 -2.5857 -0.0122
2 11 18 -1.4407 0.0361
2 11 19 -0.3220 0.0049
2 12 0 -0.8892 -0.2009
2 12 1 -1.9405 -0.3779
2 12 2 0.7061 -0.0111
2 12 3 0.9370 0.1843
2 12 4 -1.6111 -0.0199
2 12 5 -1.4565 -0.0330
2 12 6 -0.3244 0.1309
2 12 7 -1.3751 0.0499
2 12 8 -1.2928 -0.0688
2 12 9 0.2577 0.0045
2 12 10 -0.0708 0.0124
2 12 11 -0.2972 -0.0608
2 12 12 1.4699 -0.0161
2 12 13 1.8684 0.0219
2 12 14 -0.3644 -0.0183
2 12 15 -2.4049 -0.0104
2 12 16 -1.5262 0.0242
2 12 17 1.4519 0.0402
2 12 18 2.4379 0.0105
2 13 0 -1.6734 -0.3554
2 13 1 -0.2394 -0.0194
2 13 2 0.5281 0.2650
2 13 3 -0.2379 0.0531
2 13 4 0.2117 -0.0873
2 13 5 2.2065 0.0926
2 13 6 2.0522 0.0859
2 13 7 0.7644 -0.0900
2 13 8 0.9513 -0.0495
2 13 9 0.5194 0.0305
2 13 10 -0.9784 -0.0420
2 13 11 -1.1068 -0.0367
2 13 12 -1.1574 0.0453
2 13 13 -2.4886 0.0144
2 13 14 -2.6899 -0.0132
2 13 15 -1.3769 0.0247
2 13 16 -0.7526 0.0131
2 13 17 -1.7575 0.0014
2 13 18 -3.2484 0.0020
2 14 0 -1.7424 -0.0124
2 14 1 -1.5134 0.3311
2 14 2 1.7979 0.1582
2 14 3 2.7615 -0.1356
2 14 4 1.7900 -0.0283
2 14 5 0.8097 0.0683
2 14 6 -0.2284 -0.0953
2 14 7 -0.6043 -0.1020
2 14 8 -0.3858 0.0363
2 14 9 -0.6072 0.0026
2 14 10 -0.9103 -0.0391
2 14 11 -0.6739 0.0570
2 14 12 0.1162 0.0609
2 14 13 1.6105 -0.0258
2 14 14 2.6185 0.0023
2 14 15 1.7061 0.0444
2 14 16 0.5996 -0.0037
2 14 17 1.1762 -0.0252
2 15 0 0.5454 0.3131
2 15 1 1.4471 0.2022
2 15 2 0.7780 -0.1708
2 15 3 -1.6669 -0.1396
2 15 4 -2.1659 0.0846
2 15 5 -1.3677 -0.0080
2 15 6 -1.1893 -0.0989
2 15 7 -1.0991 0.0496
2 15 8 -0.7143 0.0718
2 15 9 -0.4214 -0.0331
2 15 10 -0.2114 0.0126
2 15 11 0.3964 0.0705
2 15 12 0.9328 -0.0068
2 15 13 -0.0496 -0.0431
2 15 14 -2.1263 -0.0014
2 15 15 -2.5880 -0.0344
2 15 16 -0.4898 -0.0750
2 16 0 -1.9820 0.1891
2 16 1 -0.3436 -0.1823
2 16 2 1.2677 -0.2321
2 16 3 1.4317 0.0501
2 16 4 0.9013 0.0623
2 16 5 0.5428 -0.0910
2 16 6 0.6880 0.0207
2 16 7 0.7545 0.1173
2 16 8 1.0671 -0.0046
2 16 9 1.2552 -0.0234
2 16 10 -0.5443 0.0473
2 16 11 -2.8511 -0.0181
2 16 12 -2.4311 -0.0809
2 16 13 0.1626 -0.0152
2 16 14 2.0319 0.0322
2 16 15 1.7677 -0.0039
2 17 0 -3.0371 -0.1501
2 17 1 0.4826 -0.2403
2 17 2 2.1630 0.0355
2 17 3 0.9884 0.1487
2 17 4 0.1655 -0.0331
2 17 5 0.3792 -0.0254
2 17 6 -0.2971 0.1134
2 17 7 -1.5654 0.0188
2 17 8 -1.2139 -0.0756
2 17 9 -0.7667 0.0004
2 17 10 -0.8571 -0.0000
2 17 11 1.9231 -0.0400
2 17 12 5.1919 0.0149
2 17 13 2.9186 0.0297
2 17 14 -2.5055 -0.0175
2 18 0 3.4240 -0.2395
2 18 1 4.0905 0.0278
2 18 2 1.4121 0.2254
2 18 3 -1.4041 0.0360
2 18 4 -2.1687 -0.0909
2 18 5 -1.4305 0.0524
2 18 6 -0.9414 0.0473
2 18 7 -0.4265 -0.0873
2 18 8 0.8176 -0.0257
2 18 9 0.7268 0.0311
2 18 10 -0.3212 -0.0551
2 18 11 -0.5050 -0.0457
2 18 12 -1.5227 0.0222
2 19 0 -0.6649 0.0218
2 19 1 1.6479 0.2521
2 19 2 0.4301 0.0955
2 19 3 -1.4030 -0.1144
2 19 4 -0.4684 -0.0064
2 19 5 1.6199 0.0607
2 19 6 1.1138 -0.0883
2 19 7 -0.0229 -0.0658
2 19 8 0.6357 0.0671
2 19 9 0.4529 -0.0116
3 -18 0 -0.1852 0.2803
3 -18 1 -4.7582 0.0878
3 -18 2 -3.8823 -0.1012
3 -18 3 -0.2650 -0.0429
3 -17 0 0.0911 0.1223
3 -17 1 0.6565 -0.1606
3 -17 2 3.5972 -0.1294
3 -17 3 2.0275 0.0175
3 -17 4 0.2873 0.0093
3 -17 5 0.7135 -0.0237
3 -17 6 -0.6646 -0.0122
3 -16 0 -4.0374 -0.2158
3 -16 1 -2.6766 -0.2266
3 -16 2 -0.5494 0.0146
3 -16 3 0.0953 0.0752
3 -16 4 2.4916 0.0063
3 -16 5 2.4418 0.0143
3 -16 6 -0.6154 0.0278
3 -16 7 -0.6031 0.0110
3 -16 8 0.7635 0.0078
3 -15 0 -1.2399 -0.2680
3 -15 1 1.3864 0.0359
3 -15 2 0.4815 0.1621
3 -15 3 -1.2428 0.0490
3 -15 4 -1.2419 0.0128
3 -15 5 -3.3559 0.0394
3 -15 6 -4.4981 -0.0037
3 -15 7 -1.4536 -0.0426
3 -15 8 0.9090 -0.0331
3 -15 9 0.6622 -0.0165
3 -15 10 0.0130 0.0142
3 -14 0 -1.6795 0.0481
3 -14 1 -0.2589 0.2688
3 -14 2 0.3939 0.1100
3 -14 3 2.0058 -0.0324
3 -14 4 1.9551 0.0009
3 -14 5 -0.6345 0.0022
3 -14 6 0.0759 -0.0473
3 -14 7 2.5318 -0.0515
3 -14 8 1.4757 -0.0253
3 -14 9 -0.5370 -0.0006
3 -14 10 -0.1630 0.0182
3 -14 11 1.7362 0.0174
3 -13 0 -0.2831 0.3450
3 -13 1 1.9789 0.1390
3 -13 2 1.7393 -0.1331
3 -13 3 0.7009 -0.0770
3 -13 4 -1.4030 0.0137
3 -13 5 -1.6242 -0.0436
3 -13 6 1.6383 -0.0736
3 -13 7 3.4501 -0.0234
3 -13 8 2.3985 0.0295
3 -13 9 0.8307 0.0481
3 -13 10 -1.0805 0.0396
3 -13 11 -2.4235 0.0266
3 -13 12 -2.4476 0.0170
3 -12 0 1.8490 0.1482
3 -12 1 1.2373 -0.2280
3 -12 2 -0.5101 -0.1911
3 -12 3 -1.9002 0.0228
3 -12 4 -2.8924 0.0082
3 -12 5 -0.9476 -0.0413
3 -12 6 2.2817 0.0154
3 -12 7 2.2824 0.0451
3 -12 8 -0.3980 0.0301
3 -12 9 -2.6809 0.0156
3 -12 10 -1.9570 0.0022
3 -12 11 1.5343 -0.0084
3 -12 12 3.6801 -0.0131
3 -12 13 3.0259 -0.0049
3 -11 0 3.1007 -0.2967
3 -11 1 1.7051 -0.2965
3 -11 2 1.6145 0.0540
3 -11 3 0.1295 0.1248
3 -11 4 -1.4738 -0.0044
3 -11 5 0.2910 0.0200
3 -11 6 1.7634 0.0640
3 -11 7 -0.0781 0.0221
3 -11 8 -2.2034 0.0014
3 -11 9 -1.8777 0.0013
3 -11 10 0.5054 -0.0030
3 -11 11 1.7620 -0.0018
3 -11 12 0.1216 -0.0073
3 -11 13 -2.3129 -0.0167
3 -11 14 -4.0680 -0.0285
3 -11 15 -3.8482 -0.0197
3 -10 0 -2.5308 -0.3401
3 -10 1 0.6557 0.0870
3 -10 2 1.4844 0.2625
3 -10 3 -1.1440 0.0397
3 -10 4 -0.3290 -0.0283
3 -10 5 4.1171 0.0603
3 -10 6 4.7385 0.0074
3 -10 7 1.7059 -0.0585
3 -10 8 -0.2861 -0.0270
3 -10 9 -0.5903 -0.0073
3 -10 10 -0.5732 -0.0171
3 -10 11 -1.3047 -0.0184
3 -10 12 -1.9579 -0.0002
3 -10 13 -1.5121 0.0189
3 -10 14 -0.7497 0.0041
3 -10 15 0.3210 -0.0051
3 -9 0 6.5774 0.1137
3 -9 1 2.7802 0.3745
3 -9 2 -3.4213 0.0871
3 -9 3 -7.9978 -0.1228
3 -9 4 -5.4381 0.0117
3 -9 5 -1.3249 0.0350
3 -9 6 -1.4050 -0.0802
3 -9 7 -2.1906 -0.0554
3 -9 8 -1.5406 0.0092
3 -9 9 -0.4608 -0.0016
3 -9 10 1.2043 0.0008
3 -9 11 2.5258 0.0305
3 -9 12 2.1289 0.0313
3 -9 13 0.1895 -0.0066
3 -9 14 -1.2379 -0.0228
3 -9 15 -0.2786 0.0206
3 -9 16 1.4363 0.0280
3 -8 0 -3.1512 0.4271
3 -8 1 -0.7522 0.1365
3 -8 2 -0.3293 -0.2267
3 -8 3 0.6561 -0.1056
3 -8 4 4.3577 0.0541
3 -8 5 5.2951 -0.0569
3 -8 6 2.2991 -0.0803
3 -8 7 -0.5960 0.0334
3 -8 8 -2.2148 0.0397
3 -8 9 -2.0070 0.0024
3 -8 10 -0.5597 0.0223
3 -8 11 -0.8748 0.0263
3 -8 12 -2.7529 -0.0105
3 -8 13 -3.0163 -0.0381
3 -8 14 -1.2008 -0.0287
3 -8 15 -0.1804 -0.0219
3 -8 16 -0.8138 -0.0495
3 -8 17 -0.2069 -0.0391
3 -7 0 -1.5847 0.1461
3 -7 1 -0.4659 -0.3366
3 -7 2 -3.7014 -0.2517
3 -7 3 -4.5858 0.0838
3 -7 4 -0.1760 0.0511
3 -7 5 2.8486 -0.0651
3 -7 6 1.5040 0.0386
3 -7 7 -0.3689 0.0834
3 -7 8 0.3974 0.0047
3 -7 9 2.8549 -0.0017
3 -7 10 3.2321 0.0192
3 -7 11 0.5785 -0.0199
3 -7 12 -1.4067 -0.0562
3 -7 13 -0.6439 -0.0437
3 -7 14 0.6155 -0.0099
3 -7 15 0.8366 0.0029
3 -7 16 1.8770 0.0024
3 -7 17 3.5379 0.0187
3 -7 18 2.1869 0.0291
3 -6 0 3.0517 -0.3669
3 -6 1 0.7292 -0.3505
3 -6 2 -2.5127 0.1021
3 -6 3 -1.8164 0.1770
3 -6 4 0.9423 -0.0377
3 -6 5 -0.6798 -0.0018
3 -6 6 -4.3881 0.0945
3 -6 7 -3.9747 -0.0024
3 -6 8 -0.6951 -0.0601
3 -6 9 0.8651 -0.0123
3 -6 10 0.3046 -0.0141
3 -6 11 -0.3712 -0.0373
3 -6 12 0.0800 -0.0137
3 -6 13 1.3787 0.0164
3 -6 14 1.3870 0.0202
3 -6 15 -0.2732 0.0168
3 -6 16 -0.8105 0.0286
3 -6 17 -0.1153 0.0370
3 -6 18 -0.2068 0.0281
3 -5 0 0.9500 -0.3998
3 -5 1 5.6924 0.1471
3 -5 2 4.7449 0.3529
3 -5 3 3.3307 0.0388
3 -5 4 3.9708 -0.0682
3 -5 5 3.1230 0.0720
3 -5 6 1.2223 0.0144
3 -5 7 1.0984 -0.0980
3 -5 8 1.3399 -0.0460
3 -5 9 0.3368 -0.0037
3 -5 10 -1.4591 -0.0248
3 -5 11 -3.4594 -0.0062
3 -5 12 -3.2659 0.0228
3 -5 13 -0.6697 0.0168
3 -5 14 0.0497 0.0077
3 -5 15 -0.4613 0.0203
3 -5 16 1.6140 0.0286
3 -5 17 3.2562 0.0121
3 -5 18 1.4661 0.0058
3 -5 19 -0.8908 0.0131
3 -4 0 -1.8103 0.1346
3 -4 1 -2.2158 0.4158
3 -4 2 -8.3712 0.0654
3 -4 3 -8.8079 -0.1818
3 -4 4 -2.4936 0.0022
3 -4 5 0.4730 0.0503
3 -4 6 0.1489 -0.1003
3 -4 7 2.4295 -0.0700
3 -4 8 4.7793 0.0325
3 -4 9 4.0750 0.0225
3 -4 10 2.1295 0.0200
3 -4 11 0.8243 0.0469
3 -4 12 1.2666 0.0264
3 -4 13 1.3510 -0.0080
3 -4 14 -1.0562 -0.0083
3 -4 15 -1.9585 0.0070
3 -4 16 -0.1158 -0.0077
3 -4 17 0.3994 -0.0311
3 -4 18 0.1422 -0.0140
3 -4 19 0.4425 0.0066
3 -3 0 17.5987 0.5011
3 -3 1 10.0689 0.1452
3 -3 2 -1.0464 -0.2895
3 -3 3 -2.5225 -0.1502
3 -3 4 0.1486 0.0576
3 -3 5 -3.1896 -0.0613
3 -3 6 -6.0219 -0.0847
3 -3 7 -4.2585 0.0637
3 -3 8 -4.0594 0.0683
3 -3 9 -4.4958 0.0139
3 -3 10 -2.6749 0.0417
3 -3 11 -0.9091 0.0388
3 -3 12 0.9362 -0.0096
3 -3 13 2.0582 -0.0226
3 -3 14 0.8559 0.0002
3 -3 15 0.6638 0.0089
3 -3 16 2.0898 -0.0121
3 -3 17 2.0369 -0.0011
3 -3 18 0.1411 0.0357
3 -3 19 -2.5755 0.0248
3 -3 20 -2.8402 0.0001
3 -2 0 -2.2591 0.1346
3 -2 1 -1.0135 -0.3471
3 -2 2 -2.8205 -0.2509
3 -2 3 4.1959 0.1153
3 -2 4 11.2366 0.0720
3 -2 5 9.9549 -0.0696
3 -2 6 7.6811 0.0595
3 -2 7 6.6252 0.1085
3 -2 8 4.5122 -0.0091
3 -2 9 3.4376 -0.0094
3 -2 10 0.7306 0.0316
3 -2 11 -3.5362 -0.0253
3 -2 12 -3.2571 -0.0643
3 -2 13 -1.5024 -0.0325
3 -2 14 -2.2251 0.0052
3 -2 15 -1.4003 0.0056
3 -2 16 0.3110 -0.0005
3 -2 17 -0.3861 0.0292
3 -2 18 -1.6893 0.0293
3 -2 19 -1.3786 -0.0079
3 -2 20 0.8202 -0.0036
3 -1 0 16.6508 -0.3845
3 -1 1 -7.6029 -0.3490
3 -1 2 -22.6223 0.1216
3 -1 3 -16.0096 0.2152
3 -1 4 -8.3538 -0.0157
3 -1 5 -8.6373 0.0237
3 -1 6 -5.8440 0.1382
3 -1 7 -0.1018 0.0009
3 -1 8 2.4853 -0.0787
3 -1 9 1.7085 0.0027
3 -1 10 -1.0923 -0.0164
3 -1 11 -0.4609 -0.0771
3 -1 12 3.5953 -0.0338
3 -1 13 2.5187 0.0198
3 -1 14 -1.0462 0.0168
3 -1 15 0.2866 -0.0049
3 -1 16 2.5701 0.0029
3 -1 17 2.2087 0.0212
3 -1 18 0.9086 -0.0055
3 -1 19 -0.3827 -0.0120
3 -1 20 -0.5552 0.0147
3 0 0 2.8649 -0.3323
3 0 1 -7.8969 0.1513
3 0 2 0.7584 0.3032
3 0 3 15.9760 0.0030
3 0 4 14.9668 -0.0725
3 0 5 4.7631 0.1005
3 0 6 -0.5465 0.0247
3 0 7 -4.2821 -0.1355
3 0 8 -7.4270 -0.0556
3 0 9 -6.9078 0.0146
3 0 10 -4.1613 -0.0464
3 0 11 0.7103 -0.0229
3 0 12 3.4705 0.0463
3 0 13 0.0998 0.0361
3 0 14 -2.4633 0.0126
3 0 15 -1.2857 0.0139
3 0 16 -1.3809 0.0182
3 0 17 -2.4246 0.0023
3 0 18 -2.2495 -0.0227
3 0 19 -0.5901 -0.0013
3 0 20 2.1694 0.0045
3 1 0 -13.0773 0.1907
3 1 1 -13.5972 0.3932
3 1 2 -1.7627 0.0566
3 1 3 9.3909 -0.1465
3 1 4 7.5059 0.0084
3 1 5 2.8882 0.0158
3 1 6 3.7122 -0.1540
3 1 7 5.7924 -0.1021
3 1 8 6.8856 0.0454
3 1 9 5.1224 0.0134
3 1 10 1.7335 -0.0148
3 1 11 0.6499 0.0548
3 1 12 -2.0272 0.0488
3 1 13 -5.8556 0.0033
3 1 14 -2.8240 0.0101
3 1 15 3.3868 0.0072
3 1 16 4.4424 -0.0095
3 1 17 1.7114 -0.0163
3 1 18 -0.7733 -0.0132
3 1 19 -1.1240 0.0054
3 1 20 -0.3724 -0.0102
3 1 21 -0.9350 -0.0303
3 2 0 1.0108 0.4426
3 2 1 -12.4542 0.0647
3 2 2 -9.8265 -0.2377
3 2 3 -5.9568 -0.0758
3 2 4 -10.8344 0.0376
3 2 5 -12.4881 -0.1031
3 2 6 -6.9212 -0.1014
3 2 7 -2.0631 0.0582
3 2 8 -0.7616 0.0582
3 2 9 -0.7596 -0.0163
3 2 10 1.3396 0.0317
3 2 11 3.3052 0.0564
3 2 12 0.7868 -0.0088
3 2 13 -0.5007 -0.0189
3 2 14 2.1077 -0.0045
3 2 15 1.0664 -0.0298
3 2 16 -2.4729 -0.0241
3 2 17 -1.7773 -0.0005
3 2 18 1.1980 0.0071
3 2 19 2.4840 0.0183
3 2 20 1.6129 0.0086
3 2 21 -0.1155 -0.0051
3 3 0 -12.8417 0.0121
3 3 1 -1.8741 -0.3741
3 3 2 21.1993 -0.2022
3 3 3 26.4454 0.0619
3 3 4 12.2261 -0.0063
3 3 5 0.2741 -0.0453
3 3 6 -3.2977 0.0945
3 3 7 -4.0816 0.1014
3 3 8 -3.9457 -0.0090
3 3 9 -3.0605 0.0059
3 3 10 -2.1039 0.0570
3 3 11 -3.0601 -0.0068
3 3 12 -4.4190 -0.0480
3 3 13 -2.1326 0.0001
3 3 14 0.4906 0.0017
3 3 15 0.6338 -0.0255
3 3 16 1.9196 -0.0030
3 3 17 2.7324 0.0080
3 3 18 0.5486 0.0029
3 3 19 -0.2745 0.0136
3 3 20 1.2635 0.0034
3 3 21 1.4023 -0.0113
3 4 0 -15.3362 -0.4041
3 4 1 -1.6339 -0.2501
3 4 2 5.5241 0.1461
3 4 3 -4.7516 0.1159
3 4 4 -12.2853 -0.0503
3 4 5 -2.9220 0.0534
3 4 6 9.9681 0.1204
3 4 7 13.2482 0.0027
3 4 8 8.6084 -0.0288
3 4 9 3.2562 0.0286
3 4 10 0.9514 -0.0096
3 4 11 0.0204 -0.0664
3 4 12 -0.2313 -0.0142
3 4 13 0.8369 0.0307
3 4 14 1.7790 -0.0086
3 4 15 2.4331 -0.0078
3 4 16 1.6510 0.0349
3 4 17 -2.0771 0.0202
3 4 18 -4.0306 -0.0034
3 4 19 -2.0021 0.0014
3 4 20 -1.3785 -0.0112
3 4 21 -2.8871 -0.0236
3 5 0 3.0286 -0.2478
3 5 1 8.6193 0.2178
3 5 2 4.9535 0.2790
3 5 3 -5.9780 -0.0123
3 5 4 -10.0608 -0.0206
3 5 5 -7.4964 0.0919
3 5 6 -6.7671 -0.0326
3 5 7 -7.3572 -0.1163
3 5 8 -5.5757 -0.0189
3 5 9 -1.4799 0.0076
3 5 10 1.9168 -0.0479
3 5 11 2.3253 -0.0162
3 5 12 1.8030 0.0513
3 5 13 2.1378 0.0243
3 5 14 2.0712 -0.0217
3 5 15 0.6152 0.0092
3 5 16 -1.8237 0.0217
3 5 17 -2.1124 -0.0174
3 5 18 1.1717 -0.0165
3 5 19 2.8259 -0.0003
3 5 20 0.6506 -0.0155
3 5 21 -0.6156 -0.0179
3 6 0 2.3632 0.2012
3 6 1 8.6337 0.3778
3 6 2 5.3273 0.0203
3 6 3 -0.6916 -0.1486
3 6 4 0.1176 0.0396
3 6 5 5.2046 0.0326
3 6 6 7.8201 -0.1020
3 6 7 5.3348 -0.0337
3 6 8 0.5516 0.0323
3 6 9 -1.6089 -0.0233
3 6 10 -1.9253 -0.0087
3 6 11 -3.6973 0.0632
3 6 12 -5.2088 0.0492
3 6 13 -3.8934 -0.0114
3 6 14 -1.0879 -0.0070
3 6 15 -0.0589 0.0158
3 6 16 -1.2040 -0.0247
3 6 17 -1.2129 -0.0458
3 6 18 0.2137 -0.0051
3 6 19 0.6114 0.0125
3 6 20 0.6615 0.0003
3 6 21 0.9470 -0.0122
3 7 0 -0.6550 0.4092
3 7 1 0.0688 0.0428
3 7 2 -3.5504 -0.2790
3 7 3 -5.4828 -0.0829
3 7 4 -2.4642 0.0693
3 7 5 2.7916 -0.0755
3 7 6 5.1849 -0.0606
3 7 7 2.7991 0.0798
3 7 8 0.3043 0.0420
3 7 9 0.8614 -0.0103
3 7 10 1.0533 0.0360
3 7 11 0.2282 0.0317
3 7 12 1.5986 -0.0221
3 7 13 3.7419 -0.0283
3 7 14 2.4399 -0.0037
3 7 15 -1.4430 -0.0166
3 7 16 -2.0538 -0.0360
3 7 17 1.5701 -0.0053
3 7 18 2.8866 0.0091
3 7 19 -0.1318 -0.0114
3 7 20 -2.6642 -0.0129
3 7 21 -2.1938 -0.0156
3 8 0 2.7258 0.0632
3 8 1 0.0733 -0.3282
3 8 2 -5.4640 -0.1795
3 8 3 -7.9424 0.1089
3 8 4 -3.6584 0.0057
3 8 5 2.2505 -0.0944
3 8 6 1.3964 0.0558
3 8 7 -3.9715 0.0773
3 8 8 -4.0720 -0.0187
3 8 9 0.6094 0.0173
3 8 10 2.0272 0.0440
3 8 11 0.1203 -0.0227
3 8 12 -0.4416 -0.0461
3 8 13 0.2046 -0.0170
3 8 14 -0.1426 -0.0123
3 8 15 -0.3289 -0.0309
3 8 16 1.0248 -0.0083
3 8 17 0.6310 0.0294
3 8 18 -2.4787 0.0109
3 8 19 -2.8597 -0.0006
3 8 20 0.2022 0.0027
3 9 0 3.9000 -0.3415
3 9 1 4.7323 -0.2340
3 9 2 3.0603 0.1470
3 9 3 2.6330 0.1332
3 9 4 5.1264 -0.0684
3 9 5 5.1573 0.0243
3 9 6 -0.1835 0.1174
3 9 7 -3.9030 -0.0139
3 9 8 -2.0468 -0.0494
3 9 9 -1.0381 0.0175
3 9 10 -3.3704 -0.0199
3 9 11 -3.8581 -0.0524
3 9 12 -1.9585 -0.0105
3 9 13 -1.5567 0.0117
3 9 14 -2.0631 0.0001
3 9 15 -0.0783 0.0031
3 9 16 2.6263 0.0355
3 9 17 1.7942 0.0255
3 9 18 0.1932 -0.0100
3 9 19 1.4762 0.0219
3 9 20 2.1639 0.0164
3 10 0 1.5958 -0.2742
3 10 1 -2.8082 0.1541
3 10 2 -7.2333 0.2422
3 10 3 -4.4596 -0.0242
3 10 4 2.9404 -0.0389
3 10 5 4.9513 0.1157
3 10 6 1.0605 0.0271
3 10 7 -0.4681 -0.0820
3 10 8 1.5362 -0.0097
3 10 9 2.2158 -0.0064
3 10 10 1.6232 -0.0702
3 10 11 1.8400 -0.0285
3 10 12 2.3989 0.0298
3 10 13 3.1045 0.0305
3 10 14 3.7314 0.0126
3 10 15 2.6708 0.0096
3 10 16 -0.7203 0.0180
3 10 17 -3.1850 -0.0192
3 10 18 -1.3006 -0.0331
3 10 19 1.0225 0.0055
3 10 20 -0.3045 -0.0276
3 11 0 1.0574 0.1737
3 11 1 -2.8612 0.3255
3 11 2 -3.1570 0.0132
3 11 3 0.2518 -0.1302
3 11 4 1.1029 0.0435
3 11 5 -3.2340 0.0333
3 11 6 -6.1517 -0.1199
3 11 7 -3.3440 -0.0580
3 11 8 0.6737 0.0369
3 11 9 1.7476 -0.0161
3 11 10 1.0778 -0.0129
3 11 11 0.3623 0.0492
3 11 12 -0.1943 0.0343
3 11 13 -1.0814 0.0015
3 11 14 -2.2694 -0.0055
3 11 15 -2.1706 0.0100
3 11 16 -0.4581 0.0142
3 11 17 1.4089 -0.0292
3 11 18 2.0226 -0.0159
3 11 19 0.5166 0.0077
3 12 0 -1.0054 0.3682
3 12 1 -0.0680 0.0581
3 12 2 1.2131 -0.2119
3 12 3 3.6958 -0.0552
3 12 4 3.7983 0.0439
3 12 5 1.5335 -0.1022
3 12 6 0.8771 -0.0833
3 12 7 1.7208 0.0653
3 12 8 1.2074 0.0336
3 12 9 -0.4172 -0.0201
3 12 10 -1.2971 0.0484
3 12 11 -1.2287 0.0507
3 12 12 -0.7629 -0.0075
3 12 13 -0.0855 -0.0077
3 12 14 1.1143 -0.0023
3 12 15 2.2683 -0.0059
3 12 16 1.5479 -0.0210
3 12 17 -0.5432 -0.0268
3 12 18 -2.2308 0.0385
3 12 19 -3.3370 0.0386
3 13 0 1.2858 0.0481
3 13 1 -2.7269 -0.2852
3 13 2 -2.5000 -0.1325
3 13 3 -0.3480 0.1065
3 13 4 -0.2302 -0.0139
3 13 5 -0.1375 -0.0935
3 13 6 0.9371 0.0664
3 13 7 1.0068 0.0880
3 13 8 0.3640 -0.0235
3 13 9 0.2534 0.0034
3 13 10 0.1636 0.0371
3 13 11 0.0669 -0.0377
3 13 12 0.8892 -0.0464
3 13 13 1.8642 -0.0031
3 13 14 1.5347 -0.0134
3 13 15 0.1356 -0.0098
3 13 16 -0.9258 -0.0001
3 13 17 -0.6578 -0.0043
3 13 18 0.1521 0.0049
3 14 0 -2.7075 -0.3259
3 14 1 -2.6912 -0.2158
3 14 2 -1.4442 0.1289
3 14 3 -0.9954 0.0899
3 14 4 -0.6858 -0.0796
3 14 5 -0.2759 0.0513
3 14 6 -1.1467 0.1404
3 14 7 -1.1838 -0.0053
3 14 8 0.7537 -0.0431
3 14 9 1.5405 0.0311
3 14 10 0.5831 -0.0218
3 14 11 0.2711 -0.0719
3 14 12 -0.0529 0.0036
3 14 13 -2.2438 0.0337
3 14 14 -3.9278 -0.0001
3 14 15 -2.3155 0.0088
3 14 16 0.2522 0.0097
3 14 17 0.4294 0.0076
3 15 0 -1.8133 -0.2220
3 15 1 0.0342 0.1624
3 15 2 2.3068 0.2235
3 15 3 3.8063 -0.0455
3 15 4 4.2328 -0.0464
3 15 5 2.7755 0.0994
3 15 6 0.8565 -0.0083
3 15 7 0.7426 -0.1042
3 15 8 0.0957 -0.0056
3 15 9 -1.8323 0.0104
3 15 10 -1.7500 -0.0599
3 15 11 -0.3888 -0.0138
3 15 12 -0.7137 0.0472
3 15 13 -0.8598 0.0055
3 15 14 1.7983 -0.0045
3 15 15 3.8449 0.0418
3 15 16 1.1279 0.0240
3 16 0 -1.6250 0.1405
3 16 1 -2.3783 0.2887
3 16 2 -2.1561 -0.0000
3 16 3 -0.9099 -0.1303
3 16 4 0.6551 0.0530
3 16 5 -0.0797 0.0352
3 16 6 -1.2663 -0.1179
3 16 7 -1.0530 -0.0392
3 16 8 -1.4886 0.0510
3 16 9 -1.2754 -0.0186
3 16 10 1.0247 -0.0160
3 16 11 2.0315 0.0693
3 16 12 0.5545 0.0582
3 16 13 -0.5374 -0.0019
3 16 14 -0.1680 0.0039
3 16 15 -0.1148 0.0148
3 17 0 3.1155 0.2763
3 17 1 2.4997 0.0302
3 17 2 1.2183 -0.1812
3 17 3 1.3745 -0.0163
3 17 4 0.4734 0.0686
3 17 5 -1.9491 -0.0952
3 17 6 -1.2315 -0.0736
3 17 7 1.0037 0.0738
3 17 8 1.0581 0.0284
3 17 9 1.4746 -0.0204
3 17 10 1.4316 0.0431
3 17 11 -2.3586 0.0210
3 17 12 -5.5140 -0.0515
3 17 13 -2.6349 -0.0269
3 17 14 2.9653 0.0240
3 18 0 -4.7310 0.0139
3 18 1 -4.1574 -0.2267
3 18 2 -0.9361 -0.1110
3 18 3 2.3477 0.0806
3 18 4 2.0182 -0.0185
3 18 5 0.6451 -0.0783
3 18 6 0.8870 0.0706
3 18 7 -0.8814 0.0764
3 18 8 -3.2050 -0.0224
3 18 9 -1.7734 0.0195
3 18 10 -0.0577 0.0384
3 18 11 0.3016 -0.0245
3 18 12 2.6677 -0.0115
3 19 0 1.1882 -0.2252
3 19 1 0.0694 -0.1335
3 19 2 0.8449 0.1333
3 19 3 1.4155 0.0976
3 19 4 -0.1745 -0.0708
3 19 5 -0.9201 0.0142
3 19 6 -0.3663 0.0960
3 19 7 -0.9541 -0.0193
3 19 8 -0.0540 -0.0325
3 19 9 2.2391 0.0439
4 -18 0 3.1721 -0.0485
4 -18 1 3.2959 0.1671
4 -17 0 0.2754 0.2228
4 -17 1 -0.7237 0.1655
4 -17 2 -0.2675 -0.0442
4 -17 3 0.8133 -0.0535
4 -17 4 1.8087 -0.0170
4 -17 5 2.6859 -0.0290
4 -16 0 1.4835 0.2332
4 -16 1 0.7330 -0.0806
4 -16 2 -0.7575 -0.1590
4 -16 3 -2.9099 -0.0203
4 -16 4 -2.3946 0.0209
4 -16 5 -0.3365 0.0046
4 -16 6 -1.3340 -0.0004
4 -16 7 -1.9010 -0.0212
4 -15 0 1.0891 -0.1161
4 -15 1 -0.3278 -0.2697
4 -15 2 0.2593 -0.0553
4 -15 3 0.8119 0.0570
4 -15 4 2.0260 -0.0048
4 -15 5 0.7440 -0.0008
4 -15 6 -2.1405 0.0374
4 -15 7 -0.4808 0.0382
4 -15 8 2.3559 0.0329
4 -15 9 1.6477 -0.0069
4 -14 0 0.1234 -0.3275
4 -14 1 0.0791 -0.0840
4 -14 2 -1.5243 0.1176
4 -14 3 -1.4350 0.0453
4 -14 4 1.3807 0.0162
4 -14 5 1.0203 0.0723
4 -14 6 -0.5825 0.0446
4 -14 7 1.0511 -0.0128
4 -14 8 1.3691 -0.0326
4 -14 9 -0.9637 -0.0389
4 -14 10 -2.2057 -0.0170
4 -14 11 -2.9245 0.0112
4 -13 0 -1.3945 -0.1177
4 -13 1 -2.5293 0.1993
4 -13 2 -1.5236 0.1328
4 -13 3 1.9936 -0.0127
4 -13 4 1.2185 0.0228
4 -13 5 -4.9297 0.0418
4 -13 6 -5.4727 -0.0087
4 -13 7 -0.1345 -0.0334
4 -13 8 1.4272 -0.0424
4 -13 9 0.4927 -0.0312
4 -13 10 1.7707 0.0068
4 -13 11 2.7305 0.0257
4 -13 12 2.0973 0.0187
4 -12 0 -2.4614 0.2810
4 -12 1 -1.8334 0.2300
4 -12 2 1.2371 -0.0491
4 -12 3 2.8725 -0.0520
4 -12 4 -0.9905 0.0432
4 -12 5 -3.3165 -0.0116
4 -12 6 1.2364 -0.0663
4 -12 7 3.7436 -0.0475
4 -12 8 1.1155 -0.0133
4 -12 9 0.6126 0.0179
4 -12 10 1.3343 0.0221
4 -12 11 -0.9549 0.0145
4 -12 12 -2.5733 0.0172
4 -12 13 -0.6238 0.0099
4 -11 0 -1.9945 0.3090
4 -11 1 2.1616 -0.0820
4 -11 2 5.3506 -0.1969
4 -11 3 4.2291 -0.0179
4 -11 4 -0.3140 0.0044
4 -11 5 -0.4933 -0.0569
4 -11 6 2.7897 -0.0124
4 -11 7 2.5369 0.0275
4 -11 8 0.9832 0.0226
4 -11 9 0.3176 0.0181
4 -11 10 -2.5382 0.0169
4 -11 11 -4.6687 0.0270
4 -11 12 -1.5496 0.0186
4 -11 13 3.3187 -0.0100
4 -11 14 3.9778 -0.0130
4 -10 0 2.3476 -0.1338
4 -10 1 1.1854 -0.3377
4 -10 2 0.4742 -0.0699
4 -10 3 -2.9234 0.0900
4 -10 4 -6.7395 -0.0099
4 -10 5 -4.7087 -0.0137
4 -10 6 -0.5975 0.0549
4 -10 7 0.7271 0.0404
4 -10 8 1.3019 0.0104
4 -10 9 1.2373 -0.0004
4 -10 10 0.9557 0.0067
4 -10 11 3.1924 0.0215
4 -10 12 5.3383 -0.0051
4 -10 13 2.9466 -0.0321
4 -10 14 -2.5225 -0.0209
4 -10 15 -5.4129 -0.0163
4 -9 0 -0.6938 -0.3983
4 -9 1 2.8405 -0.1213
4 -9 2 5.9290 0.1751
4 -9 3 3.5393 0.0706
4 -9 4 0.4395 -0.0249
4 -9 5 1.5168 0.0676
4 -9 6 1.8375 0.0727
4 -9 7 -0.3713 -0.0013
4 -9 8 -2.0351 -0.0213
4 -9 9 -3.0609 -0.0145
4 -9 10 -3.0264 -0.0033
4 -9 11 -1.8121 -0.0161
4 -9 12 -1.4372 -0.0412
4 -9 13 -1.6042 -0.0154
4 -9 14 -0.8252 0.0050
4 -9 15 0.3726 -0.0145
4 -9 16 0.2904 0.0047
4 -8 0 0.8243 -0.1285
4 -8 1 1.9387 0.2789
4 -8 2 0.9237 0.1979
4 -8 3 -4.3188 -0.0403
4 -8 4 -5.7633 0.0120
4 -8 5 -0.9631 0.0771
4 -8 6 2.9353 -0.0163
4 -8 7 3.7921 -0.0608
4 -8 8 3.0169 -0.0406
4 -8 9 1.0526 -0.0253
4 -8 10 0.4189 -0.0009
4 -8 11 1.6273 0.0074
4 -8 12 1.7530 0.0137
4 -8 13 0.0948 0.0216
4 -8 14 -1.2807 -0.0058
4 -8 15 -1.3809 -0.0052
4 -8 16 -1.3613 0.0293
4 -8 17 -1.1590 -0.0053
4 -7 0 0.4611 0.3349
4 -7 1 0.1698 0.3042
4 -7 2 -0.7415 -0.0701
4 -7 3 -4.0426 -0.1130
4 -7 4 -3.7556 0.0393
4 -7 5 -0.8282 -0.0149
4 -7 6 -0.2255 -0.0931
4 -7 7 -1.4149 -0.0437
4 -7 8 -2.9128 -0.0086
4 -7 9 -2.9585 0.0029
4 -7 10 0.3034 0.0224
4 -7 11 3.0503 0.0232
4 -7 12 1.3271 0.0261
4 -7 13 -1.0715 0.0133
4 -7 14 -0.3107 -0.0137
4 -7 15 0.2445 -0.0064
4 -7 16 -1.3517 -0.0098
4 -7 17 -0.6260 -0.0389
4 -7 18 2.6545 -0.0224
4 -6 0 0.0768 0.3430
4 -6 1 6.7270 -0.1162
4 -6 2 6.0613 -0.2625
4 -6 3 0.5177 -0.0101
4 -6 4 0.0531 0.0467
4 -6 5 3.7788 -0.0672
4 -6 6 4.1178 -0.0213
4 -6 7 -0.0416 0.0498
4 -6 8 -3.4243 0.0250
4 -6 9 -1.9108 0.0217
4 -6 10 1.4239 0.0347
4 -6 11 0.3904 0.0158
4 -6 12 -3.4261 -0.0158
4 -6 13 -3.2617 -0.0474
4 -6 14 -0.2615 -0.0457
4 -6 15 -0.2930 -0.0249
4 -6 16 -1.2265 -0.0297
4 -6 17 0.5825 -0.0189
4 -6 18 1.0289 0.0213
4 -5 0 -5.3497 -0.1220
4 -5 1 -5.0925 -0.3930
4 -5 2 -6.9412 -0.0972
4 -5 3 -6.8141 0.1066
4 -5 4 -1.0307 -0.0259
4 -5 5 4.0556 -0.0399
4 -5 6 2.7281 0.0736
4 -5 7 -0.2255 0.0458
4 -5 8 0.7530 -0.0101
4 -5 9 3.5390 0.0095
4 -5 10 3.8899 0.0041
4 -5 11 1.3181 -0.0258
4 -5 12 -0.6290 -0.0309
4 -5 13 0.8780 -0.0187
4 -5 14 2.2079 -0.0129
4 -5 15 0.0840 -0.0278
4 -5 16 -1.2212 -0.0167
4 -5 17 0.1853 0.0316
4 -5 18 0.9904 0.0394
4 -5 19 1.5362 0.0065
4 -4 0 6.9659 -0.4477
4 -4 1 7.9793 -0.1046
4 -4 2 3.5860 0.2526
4 -4 3 -1.9132 0.1008
4 -4 4 -2.4146 -0.0547
4 -4 5 -1.6999 0.0650
4 -4 6 -4.8122 0.0827
4 -4 7 -7.5400 -0.0325
4 -4 8 -5.6646 -0.0454
4 -4 9 -1.4295 -0.0217
4 -4 10 1.3590 -0.0383
4 -4 11 0.5394 -0.0329
4 -4 12 -0.8946 -0.0075
4 -4 13 0.7898 0.0062
4 -4 14 1.3992 0.0032
4 -4 15 -0.9753 0.0155
4 -4 16 -0.6267 0.0648
4 -4 17 1.6167 0.0725
4 -4 18 1.3873 0.0169
4 -4 19 0.5574 -0.0040
4 -3 0 -3.1264 -0.1551
4 -3 1 3.6963 0.3043
4 -3 2 5.2427 0.2040
4 -3 3 5.4002 -0.0788
4 -3 4 9.6779 0.0043
4 -3 5 10.8219 0.1013
4 -3 6 4.5778 -0.0380
4 -3 7 0.5216 -0.0980
4 -3 8 2.6191 -0.0306
4 -3 9 4.1393 -0.0136
4 -3 10 1.2015 -0.0098
4 -3 11 -3.5556 0.0194
4 -3 12 -4.1824 0.0362
4 -3 13 -0.4849 0.0328
4 -3 14 0.6276 0.0096
4 -3 15 -0.5423 0.0098
4 -3 16 -0.0553 0.0246
4 -3 17 -0.6374 -0.0116
4 -3 18 -1.4004 -0.0377
4 -3 19 0.0544 -0.0047
4 -3 20 -0.7642 0.0087
4 -2 0 1.0234 0.3771
4 -2 1 -1.0737 0.3159
4 -2 2 -9.4600 -0.1210
4 -2 3 -14.4277 -0.1592
4 -2 4 -10.3367 0.0454
4 -2 5 -7.9110 -0.0184
4 -2 6 -8.5950 -0.1190
4 -2 7 -3.7134 -0.0265
4 -2 8 2.5242 0.0277
4 -2 9 3.7823 0.0046
4 -2 10 3.1891 0.0242
4 -2 11 2.9483 0.0463
4 -2 12 3.1828 0.0421
4 -2 13 2.4870 0.0117
4 -2 14 -0.8954 -0.0264
4 -2 15 -2.7703 -0.0118
4 -2 16 -1.0146 0.0007
4 -2 17 1.1865 -0.0249
4 -2 18 3.2789 -0.0098
4 -2 19 2.7703 0.0090
4 -2 20 -1.0540 -0.0171
4 -1 0 7.9218 0.3898
4 -1 1 11.5876 -0.1061
4 -1 2 6.3277 -0.2700
4 -1 3 4.6240 0.0062
4 -1 4 9.0224 0.0599
4 -1 5 6.2162 -0.0951
4 -1 6 -1.2874 -0.0331
4 -1 7 -3.6529 0.0806
4 -1 8 -3.1551 0.0396
4 -1 9 -1.7191 0.0227
4 -1 10 -0.5191 0.0550
4 -1 11 -2.4161 0.0363
4 -1 12 -2.7293 -0.0004
4 -1 13 0.5343 -0.0332
4 -1 14 2.1911 -0.0323
4 -1 15 1.8099 0.0028
4 -1 16 0.5947 -0.0073
4 -1 17 -0.9789 -0.0169
4 -1 18 -1.1712 0.0115
4 -1 19 -1.7703 -0.0062
4 -1 20 -2.1171 -0.0207
4 0 0 6.0641 -0.1601
4 0 1 5.7067 -0.4034
4 0 2 -4.5735 -0.0681
4 0 3 -3.2365 0.1497
4 0 4 3.6429 -0.0176
4 0 5 0.9899 -0.0470
4 0 6 -0.9694 0.1082
4 0 7 4.6291 0.0795
4 0 8 7.7880 -0.0181
4 0 9 4.9822 0.0066
4 0 10 -0.8344 0.0086
4 0 11 -4.8536 -0.0363
4 0 12 -2.6648 -0.0389
4 0 13 -0.1522 -0.0306
4 0 14 -1.7891 -0.0190
4 0 15 -2.2197 -0.0108
4 0 16 -0.3324 -0.0110
4 0 17 1.3295 0.0260
4 0 18 1.6911 0.0348
4 0 19 -0.8517 -0.0077
4 0 20 -2.8114 0.0061
4 0 21 -1.1099 0.0254
4 1 0 10.4556 -0.4492
4 1 1 -9.2722 -0.1057
4 1 2 -21.4380 0.2338
4 1 3 -12.8831 0.0806
4 1 4 -3.3912 -0.0635
4 1 5 -3.4390 0.0855
4 1 6 -2.0743 0.1087
4 1 7 -0.0281 -0.0517
4 1 8 -1.4488 -0.0634
4 1 9 -0.8034 -0.0020
4 1 10 1.5012 -0.0422
4 1 11 3.3003 -0.0529
4 1 12 5.5586 -0.0060
4 1 13 4.6856 -0.0000
4 1 14 0.7095 -0.0044
4 1 15 -1.9012 0.0078
4 1 16 -2.3793 0.0291
4 1 17 -0.4927 0.0399
4 1 18 1.3275 -0.0062
4 1 19 -0.0280 -0.0354
4 1 20 -0.4470 -0.0019
4 1 21 1.6018 0.0039
4 2 0 4.6393 -0.1061
4 2 1 -0.9837 0.3431
4 2 2 4.9123 0.2082
4 2 3 16.9764 -0.0826
4 2 4 14.3231 -0.0003
4 2 5 0.9611 0.0981
4 2 6 -6.2264 -0.0521
4 2 7 -6.6708 -0.1118
4 2 8 -4.1697 -0.0064
4 2 9 -1.8100 -0.0050
4 2 10 -3.2428 -0.0514
4 2 11 -3.2330 0.0060
4 2 12 -0.1192 0.0413
4 2 13 -0.9310 0.0091
4 2 14 -3.4895 0.0109
4 2 15 -1.6901 0.0310
4 2 16 2.0426 0.0281
4 2 17 3.0064 -0.0007
4 2 18 -0.1919 -0.0375
4 2 19 -3.0220 -0.0246
4 2 20 -0.3923 0.0047
4 2 21 3.3900 0.0073
4 3 0 -5.0368 0.4291
4 3 1 -10.8162 0.3059
4 3 2 -6.2555 -0.1339
4 3 3 1.9308 -0.1415
4 3 4 2.0149 0.0376
4 3 5 1.2632 -0.0549
4 3 6 5.4631 -0.1423
4 3 7 8.2928 -0.0113
4 3 8 7.2913 0.0527
4 3 9 3.4653 -0.0201
4 3 10 0.1442 -0.0037
4 3 11 1.2808 0.0657
4 3 12 1.4776 0.0371
4 3 13 -2.1029 -0.0035
4 3 14 -2.1338 0.0107
4 3 15 1.2967 0.0116
4 3 16 1.9742 -0.0025
4 3 17 0.2179 -0.0121
4 3 18 -1.6034 -0.0166
4 3 19 -2.3894 -0.0022
4 3 20 -1.6968 0.0098
4 3 21 -1.0149 0.0257
4 4 0 -0.5421 0.3371
4 4 1 -8.4034 -0.2029
4 4 2 -3.5005 -0.3019
4 4 3 1.5939 -0.0043
4 4 4 -4.1230 0.0228
4 4 5 -11.2004 -0.0990
4 4 6 -11.3188 -0.0057
4 4 7 -6.6812 0.0843
4 4 8 -1.9247 0.0061
4 4 9 -0.0881 -0.0211
4 4 10 1.5512 0.0526
4 4 11 4.1479 0.0477
4 4 12 3.1405 -0.0196
4 4 13 0.3343 -0.0181
4 4 14 -0.2206 0.0045
4 4 15 -1.0079 -0.0158
4 4 16 -1.7428 -0.0250
4 4 17 -0.2767 -0.0106
4 4 18 0.8081 0.0005
4 4 19 1.3316 0.0048
4 4 20 3.4894 0.0081
4 4 21 4.7304 0.0166
4 5 0 -4.9707 -0.2606
4 5 1 -0.0104 -0.4378
4 5 2 12.3731 -0.0362
4 5 3 14.2957 0.1485
4 5 4 4.6950 -0.0118
4 5 5 -0.5533 0.0119
4 5 6 2.0056 0.1348
4 5 7 3.5741 0.0581
4 5 8 -0.0050 -0.0316
4 5 9 -3.9755 0.0119
4 5 10 -2.9597 0.0286
4 5 11 -0.8449 -0.0319
4 5 12 -2.5437 -0.0438
4 5 13 -4.1014 0.0012
4 5 14 -2.2014 0.0048
4 5 15 1.5591 -0.0105
4 5 16 4.8791 0.0125
4 5 17 3.9001 0.0256
4 5 18 -1.0211 0.0041
4 5 19 -2.9884 -0.0065
4 5 20 -0.5299 0.0147
4 5 21 0.4819 0.0176
4 6 0 -5.6918 -0.4656
4 6 1 -1.2444 -0.0434
4 6 2 3.3556 0.2855
4 6 3 -1.1761 0.0923
4 6 4 -6.9861 -0.0393
4 6 5 -4.4307 0.0807
4 6 6 1.7347 0.0519
4 6 7 4.3582 -0.0581
4 6 8 3.4900 -0.0157
4 6 9 3.1491 0.0231
4 6 10 4.5036 -0.0381
4 6 11 4.0778 -0.0580
4 6 12 1.6055 0.0031
4 6 13 0.5731 0.0304
4 6 14 1.0037 -0.0050
4 6 15 0.7544 -0.0039
4 6 16 -1.2796 0.0355
4 6 17 -3.9754 0.0298
4 6 18 -3.6142 -0.0058
4 6 19 0.0152 -0.0186
4 6 20 1.9005 -0.0138
4 6 21 -0.0652 -0.0304
4 7 0 -4.3868 -0.0356
4 7 1 -0.8934 0.3911
4 7 2 0.6591 0.2120
4 7 3 -4.1200 -0.0950
4 7 4 -7.1402 -0.0165
4 7 5 -4.3008 0.0493
4 7 6 -0.4149 -0.0837
4 7 7 0.3001 -0.0854
4 7 8 -1.0626 0.0012
4 7 9 -0.3337 -0.0188
4 7 10 1.9334 -0.0333
4 7 11 0.8056 0.0244
4 7 12 -2.8337 0.0517
4 7 13 -3.5486 0.0146
4 7 14 -0.4356 -0.0033
4 7 15 2.2967 0.0300
4 7 16 1.4024 0.0248
4 7 17 -0.9760 -0.0263
4 7 18 -1.2618 -0.0400
4 7 19 0.0933 -0.0184
4 7 20 0.7339 -0.0074
4 7 21 -0.3618 -0.0378
4 8 0 2.0231 0.4265
4 8 1 8.9399 0.2741
4 8 2 8.8973 -0.1525
4 8 3 2.8437 -0.1416
4 8 4 -1.3236 0.0499
4 8 5 -0.3721 -0.0389
4 8 6 2.2213 -0.1032
4 8 7 1.7852 0.0177
4 8 8 -1.1692 0.0323
4 8 9 -2.3994 -0.0279
4 8 10 -2.1717 0.0101
4 8 11 -2.8012 0.0573
4 8 12 -2.5088 0.0362
4 8 13 -0.1973 0.0009
4 8 14 1.0631 0.0046
4 8 15 -0.8603 0.0094
4 8 16 -2.8095 -0.0277
4 8 17 -0.7884 -0.0402
4 8 18 3.0080 -0.0189
4 8 19 4.0963 -0.0154
4 8 20 2.1826 -0.0128
4 8 21 -0.2057 -0.0258
4 9 0 -1.2571 0.2467
4 9 1 -0.9960 -0.2272
4 9 2 -4.0132 -0.2797
4 9 3 -5.7939 0.0226
4 9 4 -2.3275 0.0412
4 9 5 3.9072 -0.0897
4 9 6 6.6588 0.0151
4 9 7 3.5687 0.1000
4 9 8 0.1815 0.0173
4 9 9 1.2009 0.0069
4 9 10 2.8900 0.0466
4 9 11 1.7481 0.0113
4 9 12 0.5515 -0.0293
4 9 13 1.2748 -0.0268
4 9 14 1.2932 -0.0122
4 9 15 -0.8052 -0.0302
4 9 16 -1.6973 -0.0446
4 9 17 -0.1909 -0.0034
4 9 18 0.0491 0.0071
4 9 19 -1.5916 -0.0138
4 9 20 -2.7377 -0.0000
4 10 0 0.7232 -0.2412
4 10 1 1.3611 -0.3483
4 10 2 -0.0112 0.0075
4 10 3 -3.3176 0.1376
4 10 4 -5.2597 -0.0487
4 10 5 -3.9554 -0.0318
4 10 6 -2.3532 0.1074
4 10 7 -2.7400 0.0434
4 10 8 -2.3012 -0.0203
4 10 9 -0.1221 0.0330
4 10 10 0.3991 0.0163
4 10 11 -0.8597 -0.0359
4 10 12 -1.3969 -0.0343
4 10 13 -1.7525 -0.0246
4 10 14 -2.8755 -0.0201
4 10 15 -2.1928 -0.0193
4 10 16 1.4808 0.0121
4 10 17 3.3189 0.0477
4 10 18 0.9789 0.0164
4 10 19 -0.7581 0.0145
4 10 20 0.0222 0.0237
4 11 0 2.7052 -0.3876
4 11 1 5.3413 -0.0002
4 11 2 3.1762 0.2607
4 11 3 0.6572 0.0598
4 11 4 2.5640 -0.0559
4 11 5 5.9360 0.0805
4 11 6 5.0289 0.0590
4 11 7 0.6084 -0.0690
4 11 8 -2.0773 -0.0357
4 11 9 -2.2496 -0.0032
4 11 10 -2.1917 -0.0506
4 11 11 -1.6250 -0.0293
4 11 12 -0.0725 0.0099
4 11 13 1.3812 0.0095
4 11 14 2.2279 0.0103
4 11 15 2.5868 0.0119
4 11 16 1.9075 0.0414
4 11 17 0.3409 0.0395
4 11 18 0.3190 -0.0173
4 11 19 1.6188 -0.0116
4 11 20 0.7418 -0.0216
4 12 0 4.3289 -0.0214
4 12 1 -0.0812 0.3230
4 12 2 -5.5218 0.1379
4 12 3 -6.7053 -0.1012
4 12 4 -3.3500 0.0142
4 12 5 0.1911 0.0831
4 12 6 0.5727 -0.0562
4 12 7 -1.0376 -0.0614
4 12 8 -0.9698 0.0279
4 12 9 1.2885 -0.0166
4 12 10 3.0927 -0.0492
4 12 11 2.7853 0.0045
4 12 12 1.0569 0.0153
4 12 13 -0.3473 0.0134
4 12 14 -0.9906 0.0207
4 12 15 -1.3039 0.0126
4 12 16 -0.9668 0.0158
4 12 17 0.0010 -0.0310
4 12 18 0.5580 -0.0661
4 12 19 -0.3599 -0.0067
4 13 0 0.4427 0.3409
4 13 1 -0.9570 0.2042
4 13 2 -1.6609 -0.1449
4 13 3 -0.1847 -0.1030
4 13 4 1.3288 0.0574
4 13 5 0.5385 -0.0470
4 13 6 -1.8391 -0.1111
4 13 7 -2.5230 0.0163
4 13 8 0.1545 0.0413
4 13 9 2.6173 -0.0226
4 13 10 1.6553 0.0206
4 13 11 -0.6459 0.0551
4 13 12 -1.2213 0.0112
4 13 13 -0.4634 -0.0004
4 13 14 -0.4354 -0.0011
4 13 15 -0.6134 -0.0055
4 13 16 0.6566 0.0003
4 13 17 2.0140 -0.0216
4 13 18 1.2065 0.0109
4 14 0 2.6241 0.2263
4 14 1 0.5038 -0.1695
4 14 2 -0.3989 -0.2091
4 14 3 0.6661 0.0405
4 14 4 1.3350 0.0231
4 14 5 2.2657 -0.1025
4 14 6 2.9583 0.0050
4 14 7 1.8502 0.0923
4 14 8 -0.1140 0.0009
4 14 9 -1.5639 -0.0221
4 14 10 -1.6399 0.0432
4 14 11 -0.3088 0.0222
4 14 12 1.2875 -0.0219
4 14 13 1.9376 -0.0162
4 14 14 1.1533 -0.0256
4 14 15 0.2729 -0.0254
4 14 16 0.3670 -0.0096
4 14 17 -0.1572 -0.0081
4 14 18 -1.9226 0.0235
4 15 0 -0.7767 -0.1897
4 15 1 -4.7538 -0.2892
4 15 2 -4.0925 0.0171
4 15 3 -2.7629 0.1250
4 15 4 -1.6084 -0.0421
4 15 5 0.4136 -0.0203
4 15 6 0.1942 0.0970
4 15 7 -0.9699 0.0242
4 15 8 0.7772 -0.0434
4 15 9 2.6772 0.0202
4 15 10 1.4685 0.0218
4 15 11 -0.5420 -0.0519
4 15 12 -0.6788 -0.0478
4 15 13 -0.7143 -0.0017
4 15 14 -2.3539 0.0017
4 15 15 -2.1351 0.0077
4 15 16 1.4688 0.0253
4 15 17 3.6513 0.0352
4 16 0 -1.1625 -0.3102
4 16 1 1.2876 -0.0105
4 16 2 3.5587 0.2078
4 16 3 1.8809 0.0324
4 16 4 0.3975 -0.0555
4 16 5 0.5831 0.0846
4 16 6 -0.2722 0.0653
4 16 7 -0.0615 -0.0550
4 16 8 1.0294 -0.0279
4 16 9 -0.3652 0.0115
4 16 10 -1.7359 -0.0331
4 16 11 -0.2149 -0.0381
4 16 12 0.9328 0.0081
4 16 13 -1.2298 0.0172
4 16 14 -3.0611 0.0026
4 16 15 -0.6296 0.0137
4 16 16 1.4115 0.0058
4 17 0 -3.5292 -0.0308
4 17 1 -2.0724 0.2572
4 17 2 -1.3973 0.1055
4 17 3 -2.0293 -0.1020
4 17 4 0.6049 0.0162
4 17 5 2.9089 0.0710
4 17 6 1.3429 -0.0784
4 17 7 -0.2489 -0.0703
4 17 8 -1.3871 0.0385
4 17 9 -2.5988 0.0078
4 17 10 -1.0681 -0.0387
4 17 11 1.9171 -0.0005
4 17 12 2.2043 0.0309
4 17 13 -0.1027 0.0150
4 17 14 -0.9147 -0.0026
4 18 0 1.5100 0.2679
4 18 1 3.2721 0.1717
4 18 2 1.1155 -0.1079
4 18 3 -1.0881 -0.0527
4 18 4 0.3938 0.0883
4 18 5 0.0914 -0.0428
4 18 6 -1.3548 -0.1084
4 18 7 0.2890 0.0232
4 18 8 1.6510 0.0213
4 18 9 1.2306 -0.0514
4 18 10 1.0697 0.0073
4 18 11 -0.2928 0.0506
4 18 12 -3.2847 0.0090
4 19 1 1.3350 -0.1179
4 19 2 -2.0412 -0.1645
4 19 3 -2.1664 0.0392
4 19 4 0.0018 0.0192
4 19 5 -0.6938 -0.1060
4 19 6 -0.5546 -0.0048
4 19 7 0.8385 0.0765
4 19 8 -0.8178 -0.0028
4 19 9 -2.3775 0.0020
5 -17 0 0.2119 -0.2329
5 -17 1 0.3683 0.0626
5 -17 2 -1.3349 0.0887
5 -17 3 -3.2806 0.0190
5 -17 4 -4.7133 0.0651
5 -16 0 -0.2960 0.1172
5 -16 1 -0.2602 0.2389
5 -16 2 3.0856 0.0451
5 -16 3 4.4842 -0.0201
5 -16 4 2.1813 0.0068
5 -16 5 1.6279 -0.0307
5 -16 6 1.1196 -0.0302
5 -16 7 -1.4079 -0.0316
5 -15 0 1.0508 0.3308
5 -15 1 2.0919 0.0786
5 -15 2 0.9514 -0.1410
5 -15 3 -2.2799 -0.0761
5 -15 4 -1.2387 -0.0236
5 -15 5 4.1783 -0.0338
5 -15 6 3.1064 -0.0169
5 -15 7 -2.6605 -0.0262
5 -15 8 -2.9549 -0.0171
5 -15 9 -0.9907 0.0266
5 -14 0 -1.3925 0.1077
5 -14 1 -1.2190 -0.2671
5 -14 2 -0.3170 -0.1802
5 -14 3 -0.7466 0.0069
5 -14 4 0.0563 -0.0054
5 -14 5 -0.9808 -0.0215
5 -14 6 -6.1667 0.0133
5 -14 7 -5.9878 0.0257
5 -14 8 0.9305 0.0405
5 -14 9 4.0301 0.0335
5 -14 10 2.9907 0.0143
5 -14 11 3.6722 0.0468
5 -13 0 1.7954 -0.3136
5 -13 1 1.6513 -0.2489
5 -13 2 -0.6950 0.0485
5 -13 3 -1.9982 0.0675
5 -13 4 2.0753 0.0012
5 -13 5 3.8568 0.0484
5 -13 6 0.3232 0.0624
5 -13 7 -0.2668 0.0286
5 -13 8 1.3563 0.0065
5 -13 9 -0.6118 -0.0218
5 -13 10 -3.0637 -0.0261
5 -13 11 -2.6957 -0.0136
5 -13 12 -1.9612 -0.0282
5 -12 0 1.1137 -0.3434
5 -12 1 0.4583 0.0771
5 -12 2 -1.3559 0.1961
5 -12 3 1.4307 0.0336
5 -12 4 5.0174 0.0120
5 -12 5 0.0189 0.0524
5 -12 6 -5.7110 0.0149
5 -12 7 -2.3767 -0.0192
5 -12 8 1.9562 -0.0365
5 -12 9 1.0166 -0.0289
5 -12 10 0.6450 0.0147
5 -12 11 2.7200 0.0251
5 -12 12 1.9726 0.0097
5 -12 13 -1.4274 0.0098
5 -11 0 -2.2100 0.1280
5 -11 1 -5.3277 0.3306
5 -11 2 -5.2154 0.0625
5 -11 3 -0.4282 -0.0785
5 -11 4 -0.0696 0.0082
5 -11 5 -5.2388 0.0042
5 -11 6 -4.1279 -0.0511
5 -11 7 2.0526 -0.0473
5 -11 8 2.8495 -0.0230
5 -11 9 0.9636 0.0067
5 -11 10 2.4207 0.0044
5 -11 11 3.1047 -0.0163
5 -11 12 -0.4173 0.0164
5 -11 13 -2.3824 0.0436
5 -11 14 0.7758 0.0104
5 -10 0 -0.7774 0.4368
5 -10 1 -0.3532 0.1102
5 -10 2 2.8377 -0.1899
5 -10 3 6.9017 -0.0855
5 -10 4 4.6366 0.0110
5 -10 5 0.3887 -0.0383
5 -10 6 0.8983 -0.0324
5 -10 7 0.6613 0.0028
5 -10 8 -2.3178 0.0171
5 -10 9 -2.3666 0.0282
5 -10 10 -1.0590 0.0174
5 -10 11 -2.8669 0.0291
5 -10 12 -4.4636 0.0539
5 -10 13 -0.9436 0.0139
5 -10 14 4.0281 -0.0329
5 -10 15 3.7243 -0.0224
5 -9 0 -2.6117 0.1142
5 -9 1 -3.3229 -0.2858
5 -9 2 0.0512 -0.1836
5 -9 3 2.3409 0.0360
5 -9 4 -1.3643 -0.0036
5 -9 5 -3.3436 -0.0396
5 -9 6 -0.2667 0.0244
5 -9 7 2.3372 0.0448
5 -9 8 3.7111 0.0377
5 -9 9 3.9256 0.0152
5 -9 10 1.1934 -0.0064
5 -9 11 -0.9429 0.0250
5 -9 12 0.8124 0.0289
5 -9 13 2.9323 -0.0237
5 -9 14 1.1939 -0.0371
5 -9 15 -2.2535 -0.0203
5 -9 16 -2.6855 -0.0159
5 -8 0 0.3740 -0.3742
5 -8 1 -0.1406 -0.3062
5 -8 2 2.2802 0.0544
5 -8 3 2.2083 0.0890
5 -8 4 -1.4720 -0.0079
5 -8 5 -2.8859 0.0546
5 -8 6 -2.2049 0.0823
5 -8 7 -1.9532 0.0288
5 -8 8 -1.3665 0.0067
5 -8 9 -1.2685 -0.0123
5 -8 10 -1.2309 -0.0112
5 -8 11 0.6309 0.0037
5 -8 12 1.8514 -0.0300
5 -8 13 0.3977 -0.0417
5 -8 14 -0.8141 -0.0055
5 -8 15 0.4087 -0.0003
5 -8 16 1.6857 0.0037
5 -8 17 0.8333 0.0298
5 -7 0 -1.1658 -0.3381
5 -7 1 1.1694 0.1169
5 -7 2 5.5685 0.2255
5 -7 3 4.8738 0.0119
5 -7 4 -0.0943 0.0007
5 -7 5 -1.7650 0.0795
5 -7 6 0.3844 0.0198
5 -7 7 2.4050 -0.0218
5 -7 8 1.8491 -0.0182
5 -7 9 -1.2928 -0.0354
5 -7 10 -3.2506 -0.0165
5 -7 11 -1.7415 0.0028
5 -7 12 0.1059 -0.0031
5 -7 13 0.0994 0.0162
5 -7 14 0.0657 0.0126
5 -7 15 0.5014 -0.0134
5 -7 16 -0.8762 0.0042
5 -7 17 -3.3832 0.0068
5 -7 18 -3.6758 -0.0261
5 -6 0 -5.2886 0.1683
5 -6 1 -5.8063 0.3946
5 -6 2 -2.8067 0.0847
5 -6 3 -2.9654 -0.0802
5 -6 4 -4.5179 0.0334
5 -6 5 -2.1399 0.0142
5 -6 6 2.4579 -0.0726
5 -6 7 4.7439 -0.0428
5 -6 8 2.7727 -0.0212
5 -6 9 -0.9270 -0.0254
5 -6 10 -0.8790 -0.0020
5 -6 11 2.6106 0.0051
5 -6 12 2.8363 0.0195
5 -6 13 -0.6477 0.0326
5 -6 14 -1.3867 -0.0005
5 -6 15 0.3770 -0.0094
5 -6 16 -0.0629 0.0105
5 -6 17 -0.2250 -0.0091
5 -6 18 2.2703 -0.0210
5 -5 0 2.9799 0.4606
5 -5 1 6.3965 0.0993
5 -5 2 7.3819 -0.2206
5 -5 3 1.0589 -0.0717
5 -5 4 -5.2966 0.0436
5 -5 5 -4.1471 -0.0540
5 -5 6 0.1879 -0.0483
5 -5 7 -0.1222 0.0214
5 -5 8 -4.4199 0.0039
5 -5 9 -5.4502 -0.0039
5 -5 10 -0.5679 0.0209
5 -5 11 3.3851 0.0312
5 -5 12 0.9404 0.0284
5 -5 13 -1.8909 -0.0084
5 -5 14 0.2157 -0.0305
5 -5 15 1.2833 -0.0049
5 -5 16 -0.9979 -0.0160
5 -5 17 -0.8912 -0.0469
5 -5 18 0.0620 -0.0215
5 -5 19 -1.3402 0.0055
5 -4 0 -5.2941 0.1233
5 -4 1 -0.7493 -0.3407
5 -4 2 2.6338 -0.2211
5 -4 3 1.4782 0.0479
5 -4 4 1.5844 -0.0121
5 -4 5 6.4772 -0.0700
5 -4 6 9.0640 0.0385
5 -4 7 4.5859 0.0636
5 -4 8 -1.2668 0.0170
5 -4 9 -2.6365 0.0173
5 -4 10 -0.4900 0.0178
5 -4 11 0.2800 0.0060
5 -4 12 -2.0724 -0.0107
5 -4 13 -2.5356 -0.0291
5 -4 14 0.1902 -0.0187
5 -4 15 0.5107 -0.0268
5 -4 16 -0.6383 -0.0530
5 -4 17 0.1551 -0.0076
5 -4 18 -0.2647 0.0518
5 -4 19 -0.9908 0.0320
5 -3 0 -2.5125 -0.4124
5 -3 1 -2.0816 -0.3125
5 -3 2 -4.5224 0.1099
5 -3 3 -10.1743 0.1204
5 -3 4 -10.1429 -0.0487
5 -3 5 -2.4417 0.0268
5 -3 6 1.9938 0.0989
5 -3 7 -0.9586 0.0168
5 -3 8 -3.5905 -0.0261
5 -3 9 -0.9100 -0.0175
5 -3 10 4.4385 -0.0205
5 -3 11 5.7170 -0.0201
5 -3 12 1.5967 -0.0339
5 -3 13 -0.2892 -0.0329
5 -3 14 0.8602 -0.0084
5 -3 15 -0.6500 -0.0096
5 -3 16 -1.3488 0.0117
5 -3 17 1.0403 0.0575
5 -3 18 1.6022 0.0351
5 -3 19 1.6784 -0.0082
5 -3 20 2.6186 0.0122
5 -2 0 1.0065 -0.3612
5 -2 1 6.2257 0.1644
5 -2 2 7.7658 0.2883
5 -2 3 4.5003 0.0106
5 -2 4 5.3109 -0.0196
5 -2 5 9.1059 0.1005
5 -2 6 4.6944 0.0262
5 -2 7 -4.9885 -0.0563
5 -2 8 -8.1640 -0.0303
5 -2 9 -3.8502 -0.0257
5 -2 10 0.3681 -0.0277
5 -2 11 -1.1520 -0.0190
5 -2 12 -3.8312 -0.0183
5 -2 13 -0.3851 0.0188
5 -2 14 3.6218 0.0403
5 -2 15 2.8608 0.0202
5 -2 16 2.3850 0.0340
5 -2 17 1.2010 0.0406
5 -2 18 -2.3460 0.0077
5 -2 19 -2.0201 0.0072
5 -2 20 -0.2659 0.0135
5 -1 0 1.9989 0.1642
5 -1 1 6.2415 0.4021
5 -1 2 2.4259 0.0417
5 -1 3 -4.0739 -0.1460
5 -1 4 -1.4847 0.0245
5 -1 5 4.0993 0.0342
5 -1 6 1.6269 -0.0849
5 -1 7 -1.8916 -0.0532
5 -1 8 0.3886 -0.0098
5 -1 9 3.2844 -0.0251
5 -1 10 2.8385 -0.0006
5 -1 11 0.0037 0.0168
5 -1 12 -1.3159 0.0269
5 -1 13 -0.4474 0.0529
5 -1 14 -2.3969 0.0268
5 -1 15 -4.6480 0.0016
5 -1 16 -2.4269 0.0186
5 -1 17 -0.6613 -0.0023
5 -1 18 0.1572 -0.0228
5 -1 19 2.6204 -0.0058
5 -1 20 1.1579 -0.0240
5 0 0 -6.0287 0.5024
5 0 1 -7.5622 0.1039
5 0 2 -10.5097 -0.2598
5 0 3 -10.5715 -0.0868
5 0 4 -1.2941 0.0597
5 0 5 4.8722 -0.0686
5 0 6 -0.0972 -0.0738
5 0 7 -4.4734 0.0352
5 0 8 -1.9989 0.0247
5 0 9 2.8194 0.0093
5 0 10 5.4485 0.0394
5 0 11 3.3185 0.0251
5 0 12 0.6636 0.0193
5 0 13 1.3745 0.0210
5 0 14 2.1642 -0.0059
5 0 15 2.6385 -0.0059
5 0 16 2.6917 -0.0162
5 0 17 0.2813 -0.0454
5 0 18 -0.3218 -0.0155
5 0 19 1.0624 -0.0015
5 0 20 -0.6959 -0.0430
5 0 21 -1.4328 -0.0333
5 1 0 8.7219 0.1454
5 1 1 17.0440 -0.3322
5 1 2 11.6891 -0.1934
5 1 3 5.2960 0.0978
5 1 4 5.8119 0.0081
5 1 5 0.8390 -0.0814
5 1 6 -7.6956 0.0587
5 1 7 -6.6431 0.0942
5 1 8 -0.9425 0.0063
5 1 9 -0.4638 0.0107
5 1 10 -4.4209 0.0274
5 1 11 -7.0275 -0.0063
5 1 12 -3.6619 -0.0118
5 1 13 1.1294 -0.0148
5 1 14 1.3293 -0.0241
5 1 15 0.6023 -0.0235
5 1 16 0.3595 -0.0381
5 1 17 -1.0622 -0.0108
5 1 18 -0.4696 0.0385
5 1 19 0.5596 0.0118
5 1 20 -0.8846 -0.0058
5 1 21 -0.7158 0.0233
5 2 0 4.5724 -0.4292
5 2 1 0.6151 -0.3402
5 2 2 -9.6443 0.1080
5 2 3 -7.5168 0.1426
5 2 4 3.9179 -0.0381
5 2 5 7.7504 0.0354
5 2 6 6.7360 0.1163
5 2 7 6.6871 -0.0014
5 2 8 3.5541 -0.0515
5 2 9 0.0236 0.0112
5 2 10 -0.1132 -0.0034
5 2 11 0.6991 -0.0453
5 2 12 1.3007 -0.0249
5 2 13 0.6750 -0.0002
5 2 14 -0.6617 0.0007
5 2 15 -0.8756 -0.0177
5 2 16 -1.8362 -0.0163
5 2 17 -1.8477 0.0352
5 2 18 1.2117 0.0391
5 2 19 0.9764 -0.0079
5 2 20 -3.3015 -0.0040
5 2 21 -4.0846 -0.0102
5 3 0 3.4937 -0.3938
5 3 1 -6.1882 0.1571
5 3 2 -13.1284 0.3071
5 3 3 -6.6408 0.0155
5 3 4 -0.3444 -0.0399
5 3 5 -4.3882 0.0926
5 3 6 -7.7740 0.0196
5 3 7 -5.5980 -0.0925
5 3 8 -2.1670 -0.0353
5 3 9 1.5551 0.0055
5 3 10 2.8839 -0.0461
5 3 11 1.8581 -0.0463
5 3 12 2.5949 0.0031
5 3 13 3.0702 0.0184
5 3 14 0.8163 0.0065
5 3 15 -1.7993 0.0001
5 3 16 -2.5445 0.0243
5 3 17 -0.2650 0.0397
5 3 18 1.9707 0.0010
5 3 19 0.6619 -0.0128
5 3 20 0.0772 -0.0001
5 3 21 2.5993 -0.0380
5 4 0 6.8473 0.2026
5 4 1 4.0754 0.4476
5 4 2 5.0689 0.0769
5 4 3 11.3991 -0.1409
5 4 4 10.9395 0.0040
5 4 5 3.6837 0.0084
5 4 6 -0.9618 -0.1180
5 4 7 -3.0754 -0.0676
5 4 8 -3.7912 0.0322
5 4 9 -3.0820 -0.0001
5 4 10 -3.9973 -0.0358
5 4 11 -4.0917 0.0113
5 4 12 -1.2373 0.0436
5 4 13 -0.1083 0.0240
5 4 14 -0.8308 0.0003
5 4 15 0.2760 -0.0002
5 4 16 2.5453 0.0152
5 4 17 3.6510 0.0051
5 4 18 1.9717 -0.0139
5 4 19 -1.4562 0.0027
5 4 20 -2.9066 -0.0046
5 4 21 -1.4901 -0.0195
5 5 0 -0.5987 0.4985
5 5 1 -6.5968 0.1066
5 5 2 -7.2726 -0.2640
5 5 3 -1.9945 -0.1141
5 5 4 0.6671 0.0152
5 5 5 0.3853 -0.0956
5 5 6 0.9400 -0.0750
5 5 7 2.8212 0.0570
5 5 8 5.1663 0.0545
5 5 9 3.9603 0.0012
5 5 10 -0.1982 0.0240
5 5 11 -0.1363 0.0472
5 5 12 2.6316 0.0194
5 5 13 1.9316 -0.0027
5 5 14 -0.2189 -0.0012
5 5 15 -1.2835 -0.0033
5 5 16 -2.2808 -0.0149
5 5 17 -2.3852 -0.0191
5 5 18 -1.3498 0.0117
5 5 19 -0.7111 0.0329
5 5 20 -0.3353 -0.0068
5 5 21 0.7047 -0.0116
5 6 0 -1.8886 0.0955
5 6 1 -7.7620 -0.3767
5 6 2 -4.5256 -0.2349
5 6 3 2.4277 0.0522
5 6 4 1.9504 -0.0089
5 6 5 -3.7719 -0.0473
5 6 6 -6.1732 0.0842
5 6 7 -3.2519 0.0821
5 6 8 -0.2135 -0.0113
5 6 9 -0.9377 -0.0018
5 6 10 -0.7760 0.0340
5 6 11 2.8632 0.0049
5 6 12 3.7452 -0.0264
5 6 13 0.4270 -0.0158
5 6 14 -1.7359 -0.0059
5 6 15 -1.1082 -0.0144
5 6 16 1.1871 -0.0125
5 6 17 3.4064 0.0108
5 6 18 2.4732 0.0331
5 6 19 -0.8840 0.0128
5 6 20 -1.7357 -0.0132
5 6 21 0.7773 0.0162
5 7 0 3.9545 -0.4328
5 7 1 4.3463 -0.3246
5 7 2 8.9658 0.1125
5 7 3 9.7538 0.1403
5 7 4 2.7444 -0.0062
5 7 5 -3.5065 0.0758
5 7 6 -3.4367 0.1099
5 7 7 -0.9401 -0.0043
5 7 8 -1.3859 -0.0204
5 7 9 -3.7939 0.0180
5 7 10 -3.0358 -0.0232
5 7 11 0.0995 -0.0625
5 7 12 0.9724 -0.0296
5 7 13 -0.0057 0.0105
5 7 14 -0.3405 -0.0021
5 7 15 0.2964 -0.0185
5 7 16 1.1882 0.0080
5 7 17 1.0353 0.0409
5 7 18 -0.1167 0.0395
5 7 19 -0.1856 0.0046
5 7 20 1.5427 -0.0073
5 7 21 2.5169 0.0058
5 8 0 -6.5008 -0.3457
5 8 1 -7.7118 0.1856
5 8 2 -2.9902 0.3071
5 8 3 -0.4653 0.0259
5 8 4 -1.2305 -0.0117
5 8 5 -0.3722 0.0852
5 8 6 2.7902 -0.0131
5 8 7 5.2776 -0.0763
5 8 8 4.8309 -0.0055
5 8 9 3.3158 0.0004
5 8 10 3.6186 -0.0406
5 8 11 3.5771 -0.0269
5 8 12 0.8082 0.0111
5 8 13 -2.0170 0.0167
5 8 14 -1.9308 0.0007
5 8 15 0.0256 0.0182
5 8 16 0.5197 0.0431
5 8 17 -1.4377 0.0306
5 8 18 -3.5544 0.0100
5 8 19 -3.8320 -0.0053
5 8 20 -2.2944 -0.0110
5 8 21 -1.2111 -0.0380
5 9 0 -4.0010 0.2377
5 9 1 -0.7710 0.4218
5 9 2 3.2276 0.0514
5 9 3 0.8057 -0.1336
5 9 4 -4.7929 0.0163
5 9 5 -6.7716 -0.0064
5 9 6 -3.9686 -0.1268
5 9 7 -0.6131 -0.0568
5 9 8 -0.5345 0.0120
5 9 9 -1.7473 -0.0205
5 9 10 -1.3484 -0.0096
5 9 11 -0.7589 0.0377
5 9 12 -0.9935 0.0517
5 9 13 -0.6905 0.0249
5 9 14 0.5564 0.0044
5 9 15 1.2772 0.0201
5 9 16 0.3726 0.0051
5 9 17 -0.6886 -0.0276
5 9 18 -0.3053 -0.0217
5 9 19 1.1090 -0.0223
5 9 20 2.3190 -0.0292
5 10 0 0.1965 0.4545
5 10 1 5.3911 0.0566
5 10 2 6.1023 -0.2569
5 10 3 3.4342 -0.0822
5 10 4 2.4966 0.0338
5 10 5 3.3542 -0.0962
5 10 6 3.5233 -0.0695
5 10 7 1.9444 0.0548
5 10 8 -0.8087 0.0288
5 10 9 -2.3918 0.0001
5 10 10 -2.0195 0.0365
5 10 11 -1.0992 0.0335
5 10 12 -0.1714 0.0078
5 10 13 0.8202 -0.0087
5 10 14 1.3077 -0.0022
5 10 15 0.1656 -0.0022
5 10 16 -1.9123 -0.0409
5 10 17 -1.8068 -0.0281
5 10 18 0.8269 0.0077
5 10 19 2.9888 -0.0201
5 10 20 2.6848 -0.0184
5 11 0 -2.9256 0.0351
5 11 1 -2.4230 -0.3679
5 11 2 -2.5860 -0.1986
5 11 3 -2.9043 0.0753
5 11 4 -3.6442 -0.0050
5 11 5 -4.0912 -0.0571
5 11 6 -2.0556 0.0886
5 11 7 0.6449 0.0991
5 11 8 0.9509 0.0169
5 11 9 0.7683 0.0366
5 11 10 1.9946 0.0291
5 11 11 2.7143 -0.0293
5 11 12 1.2187 -0.0369
5 11 13 -1.2146 -0.0213
5 11 14 -2.3052 -0.0053
5 11 15 -1.9960 -0.0192
5 11 16 -1.1208 -0.0368
5 11 17 -0.1846 0.0135
5 11 18 -0.5077 0.0290
5 11 19 -1.7410 0.0108
5 11 20 -2.2529 0.0464
5 12 0 -0.2930 -0.3959
5 12 1 2.7111 -0.2585
5 12 2 3.8273 0.1375
5 12 3 2.4216 0.1296
5 12 4 -0.3524 -0.0353
5 12 5 -1.9898 0.0491
5 12 6 -0.6644 0.1015
5 12 7 0.9096 -0.0210
5 12 8 0.4698 -0.0368
5 12 9 -0.4812 0.0168
5 12 10 -1.1955 -0.0251
5 12 11 -1.6763 -0.0413
5 12 12 -1.2147 -0.0104
5 12 13 0.3265 -0.0104
5 12 14 1.8198 -0.0092
5 12 15 1.4620 -0.0125
5 12 16 -0.1559 0.0137
5 12 17 -0.3233 0.0601
5 12 18 1.5400 0.0183
5 12 19 3.3150 -0.0063
5 13 0 2.1994 -0.2752
5 13 1 3.8040 0.1749
5 13 2 1.6648 0.2584
5 13 3 -0.9523 0.0070
5 13 4 -2.1189 -0.0165
5 13 5 -0.2038 0.0803
5 13 6 3.4057 -0.0162
5 13 7 2.9079 -0.0864
5 13 8 -1.6031 -0.0063
5 13 9 -3.7498 -0.0033
5 13 10 -1.7119 -0.0500
5 13 11 0.7582 -0.0055
5 13 12 0.8088 0.0293
5 13 13 0.0563 0.0246
5 13 14 0.4608 0.0259
5 13 15 0.3241 0.0085
5 13 16 -0.5560 0.0196
5 13 17 0.1172 0.0174
5 13 18 1.3444 -0.0381
5 14 0 2.1367 0.1998
5 14 1 0.1061 0.3333
5 14 2 -2.0577 0.0283
5 14 3 -2.5322 -0.1107
5 14 4 -2.1348 0.0176
5 14 5 -1.0341 -0.0026
5 14 6 -0.4591 -0.1072
5 14 7 -1.4050 -0.0431
5 14 8 -0.3671 0.0324
5 14 9 2.9306 -0.0045
5 14 10 3.4788 -0.0079
5 14 11 0.7484 0.0219
5 14 12 -0.7966 0.0033
5 14 13 0.7544 0.0040
5 14 14 1.5900 0.0186
5 14 15 -0.9746 0.0054
5 14 16 -2.1764 -0.0015
5 14 17 0.9629 -0.0398
5 14 18 3.3406 -0.0477
5 15 0 2.3174 0.3302
5 15 1 1.1563 0.0117
5 15 2 0.1845 -0.2113
5 15 3 0.9017 -0.0622
5 15 4 0.6215 0.0174
5 15 5 0.0544 -0.0738
5 15 6 0.2055 -0.0289
5 15 7 0.0875 0.0786
5 15 8 -0.1481 0.0478
5 15 9 -0.8393 -0.0027
5 15 10 -1.1285 0.0272
5 15 11 0.5395 0.0409
5 15 12 2.1650 0.0163
5 15 13 1.4670 0.0028
5 15 14 -1.1706 -0.0164
5 15 15 -3.0521 -0.0261
5 15 16 -1.6093 -0.0202
5 15 17 0.1049 -0.0337
5 16 0 0.9640 -0.0028
5 16 1 -2.4844 -0.2798
5 16 2 -1.9772 -0.1155
5 16 3 0.4326 0.0758
5 16 4 0.6863 -0.0077
5 16 5 1.4216 -0.0332
5 16 6 2.4165 0.0641
5 16 7 1.6227 0.0433
5 16 8 0.6990 -0.0141
5 16 9 0.3703 0.0134
5 16 10 -0.0341 0.0175
5 16 11 -0.8614 -0.0311
5 16 12 -1.2353 -0.0435
5 16 13 0.2427 -0.0171
5 16 14 1.3599 -0.0121
5 16 15 0.7764 -0.0297
5 16 16 1.3316 -0.0312
5 17 0 -1.1736 -0.3283
5 17 1 -1.8450 -0.1882
5 17 2 1.9482 0.1247
5 17 3 2.6783 0.0817
5 17 4 -0.3554 -0.0436
5 17 5 -1.5733 0.0524
5 17 6 -1.6017 0.0798
5 17 7 -1.2332 -0.0243
5 17 8 0.3202 -0.0311
5 17 9 1.0752 0.0004
5 17 10 0.6630 -0.0171
5 17 11 0.4025 -0.0145
5 17 12 0.5622 -0.0042
5 17 13 0.0262 -0.0153
5 17 14 -2.1507 -0.0142
5 18 0 -0.2946 -0.2225
5 18 1 0.6232 0.1622
5 18 2 2.1771 0.2129
5 18 3 0.2551 -0.0244
5 18 4 -1.4438 -0.0056
5 18 5 0.0566 0.0995
5 18 6 1.0401 -0.0211
5 18 7 0.6164 -0.0810
5 18 8 -0.5157 0.0188
5 18 9 -1.8926 0.0286
5 18 10 -1.5095 -0.0255
5 18 11 0.0199 -0.0271
5 18 12 0.6686 -0.0033
5 19 2 2.0551 0.0145
5 19 3 1.6143 -0.1012
5 19 4 0.9142 0.0502
5 19 5 1.2385 0.0151
5 19 6 -0.3259 -0.1080
5 19 7 -1.6221 -0.0155
5 19 8 -0.6979 0.0479
5 19 9 1.2986 -0.0312
6 -17 0 -1.1751 -0.0619
6 -17 1 -1.6142 -0.2027
6 -17 2 1.2729 -0.0837
6 -16 0 -0.0614 -0.3149
6 -16 1 1.4324 -0.1209
6 -16 2 0.0120 0.0423
6 -16 3 -1.8255 0.0236
6 -16 4 -2.8935 0.0543
6 -16 5 -1.0578 0.0612
6 -16 6 2.6188 0.0153
6 -15 0 -2.7038 -0.0888
6 -15 1 -3.0989 0.1909
6 -15 2 -1.3456 0.1159
6 -15 3 0.5971 0.0162
6 -15 4 -1.0448 0.0398
6 -15 5 -1.6378 0.0192
6 -15 6 0.9216 -0.0037
6 -15 7 1.4241 -0.0229
6 -15 8 0.1123 -0.0776
6 -14 0 3.0687 0.2697
6 -14 1 3.5591 0.2451
6 -14 2 2.9713 -0.0138
6 -14 3 0.6184 -0.0615
6 -14 4 -0.4048 -0.0328
6 -14 5 4.0306 -0.0469
6 -14 6 6.1159 -0.0301
6 -14 7 0.2786 -0.0371
6 -14 8 -4.6042 -0.0437
6 -14 9 -3.4218 -0.0004
6 -14 10 -1.5904 -0.0057
6 -13 0 -0.3303 0.3265
6 -13 1 0.0179 -0.0826
6 -13 2 -0.0042 -0.2083
6 -13 3 -1.1485 -0.0683
6 -13 4 -0.4672 -0.0308
6 -13 5 1.9989 -0.0314
6 -13 6 0.2009 -0.0020
6 -13 7 -3.3320 -0.0090
6 -13 8 -1.8738 0.0033
6 -13 9 1.5806 0.0216
6 -13 10 2.5973 0.0018
6 -13 11 2.7985 0.0228
6 -13 12 3.5083 0.0625
6 -12 0 -0.4761 -0.0632
6 -12 1 -0.9304 -0.3130
6 -12 2 -1.6444 -0.1255
6 -12 3 -3.1005 -0.0021
6 -12 4 -1.3121 -0.0172
6 -12 5 1.6282 0.0333
6 -12 6 0.2252 0.0599
6 -12 7 -2.0758 0.0322
6 -12 8 -1.2756 0.0252
6 -12 9 -0.2160 -0.0028
6 -12 10 -1.1779 -0.0245
6 -12 11 -2.4613 0.0097
6 -12 12 -1.6212 0.0249
6 -12 13 0.2571 0.0104
6 -11 0 2.9550 -0.4299
6 -11 1 3.3967 -0.1621
6 -11 2 1.0618 0.1398
6 -11 3 -0.1467 0.0982
6 -11 4 3.4367 0.0432
6 -11 5 4.7501 0.0701
6 -11 6 0.3005 0.0389
6 -11 7 -3.2018 0.0011
6 -11 8 -2.7808 -0.0235
6 -11 9 -1.4332 -0.0453
6 -11 10 -0.4741 -0.0120
6 -11 11 1.3820 0.0181
6 -11 12 3.3360 -0.0019
6 -11 13 1.4201 0.0020
6 -11 14 -2.6496 0.0200
6 -10 0 -0.6093 -0.1723
6 -10 1 -1.1660 0.2554
6 -10 2 -3.0224 0.1984
6 -10 3 -1.8206 -0.0030
6 -10 4 0.8032 0.0109
6 -10 5 -0.7710 0.0254
6 -10 6 -3.0137 -0.0292
6 -10 7 -0.8010 -0.0466
6 -10 8 2.8000 -0.0473
6 -10 9 3.7139 -0.0297
6 -10 10 2.3449 -0.0072
6 -10 11 1.1737 -0.0189
6 -10 12 0.1473 -0.0009
6 -10 13 -2.0620 0.0454
6 -10 14 -2.2388 0.0291
6 -10 15 0.7188 -0.0142
6 -9 0 2.4000 0.3626
6 -9 1 1.0043 0.3088
6 -9 2 -2.5157 -0.0553
6 -9 3 -1.6982 -0.1100
6 -9 4 1.0772 -0.0156
6 -9 5 0.8953 -0.0425
6 -9 6 -0.1952 -0.0573
6 -9 7 -0.8661 -0.0300
6 -9 8 -1.6248 -0.0154
6 -9 9 -1.1349 0.0127
6 -9 10 0.3909 0.0227
6 -9 11 1.0833 0.0269
6 -9 12 0.0396 0.0598
6 -9 13 -1.0158 0.0507
6 -9 14 0.4263 -0.0018
6 -9 15 1.9215 -0.0225
6 -9 16 0.8018 -0.0250
6 -8 0 1.0396 0.3842
6 -8 1 -1.8869 -0.0840
6 -8 2 -1.6193 -0.2377
6 -8 3 3.4389 -0.0635
6 -8 4 4.9859 -0.0378
6 -8 5 1.7406 -0.0771
6 -8 6 -0.8234 -0.0117
6 -8 7 -1.3223 0.0328
6 -8 8 -0.0671 0.0368
6 -8 9 1.1899 0.0317
6 -8 10 -0.5455 0.0103
6 -8 11 -2.8313 0.0287
6 -8 12 -1.6398 0.0466
6 -8 13 1.0393 0.0040
6 -8 14 1.1391 -0.0239
6 -8 15 -0.9186 -0.0166
6 -8 16 -1.3467 -0.0174
6 -8 17 0.0770 -0.0052
6 -7 0 -0.0847 -0.1565
6 -7 1 -2.9081 -0.3933
6 -7 2 -2.7033 -0.1000
6 -7 3 -0.2311 0.0701
6 -7 4 0.1378 -0.0023
6 -7 5 -0.9608 0.0339
6 -7 6 -1.6600 0.0989
6 -7 7 -0.6611 0.0580
6 -7 8 2.4493 0.0205
6 -7 9 3.4840 0.0014
6 -7 10 0.7238 -0.0052
6 -7 11 -0.6597 0.0082
6 -7 12 0.4325 -0.0231
6 -7 13 -0.3525 -0.0509
6 -7 14 -2.0925 -0.0177
6 -7 15 -0.5105 -0.0049
6 -7 16 2.5033 -0.0142
6 -7 17 2.5264 0.0143
6 -7 18 1.0576 0.0369
6 -6 0 2.7309 -0.4855
6 -6 1 0.6296 -0.1539
6 -6 2 2.1200 0.1658
6 -6 3 3.7074 0.0633
6 -6 4 0.8953 -0.0047
6 -6 5 -3.9196 0.0890
6 -6 6 -5.3860 0.0668
6 -6 7 -1.9236 -0.0079
6 -6 8 1.8591 -0.0187
6 -6 9 0.8016 -0.0236
6 -6 10 -2.2953 -0.0112
6 -6 11 -1.4562 -0.0045
6 -6 12 1.7073 -0.0259
6 -6 13 2.1245 -0.0003
6 -6 14 0.9005 0.0265
6 -6 15 0.8780 -0.0068
6 -6 16 0.0259 -0.0137
6 -6 17 -2.1057 0.0109
6 -6 18 -2.2958 -0.0057
6 -5 0 -5.6236 -0.1484
6 -5 1 -4.9593 0.3358
6 -5 2 -0.0564 0.2377
6 -5 3 3.6665 -0.0204
6 -5 4 2.2124 0.0131
6 -5 5 -0.6756 0.0439
6 -5 6 0.3233 -0.0463
6 -5 7 3.9659 -0.0551
6 -5 8 4.3084 -0.0230
6 -5 9 -0.5018 -0.0197
6 -5 10 -4.4898 -0.0093
6 -5 11 -2.4410 -0.0165
6 -5 12 0.9107 -0.0036
6 -5 13 -0.5206 0.0409
6 -5 14 -2.4754 0.0214
6 -5 15 -0.8187 -0.0137
6 -5 16 0.0260 0.0133
6 -5 17 -0.5346 0.0230
6 -5 18 0.7555 -0.0001
6 -5 19 1.2026 0.0061
6 -4 0 -1.4153 0.4155
6 -4 1 -0.7179 0.3535
6 -4 2 0.2728 -0.0572
6 -4 3 -1.6431 -0.1027
6 -4 4 -6.5483 0.0242
6 -4 5 -7.9762 -0.0337
6 -4 6 -2.4576 -0.0760
6 -4 7 3.8340 -0.0193
6 -4 8 4.1847 -0.0048
6 -4 9 0.2620 -0.0005
6 -4 10 -1.1463 0.0158
6 -4 11 1.8352 0.0149
6 -4 12 2.9081 0.0315
6 -4 13 0.1312 0.0240
6 -4 14 -0.0300 -0.0158
6 -4 15 1.5137 -0.0072
6 -4 16 -0.3262 -0.0005
6 -4 17 -0.8463 -0.0406
6 -4 18 1.4416 -0.0380
6 -4 19 0.6917 -0.0003
6 -3 0 1.6254 0.4094
6 -3 1 3.8177 -0.1220
6 -3 2 6.5723 -0.2826
6 -3 3 5.0592 -0.0548
6 -3 4 -1.0024 -0.0144
6 -3 5 -2.8922 -0.0805
6 -3 6 1.7336 -0.0025
6 -3 7 4.2413 0.0554
6 -3 8 0.2766 0.0330
6 -3 9 -5.1662 0.0262
6 -3 10 -5.3782 0.0121
6 -3 11 -0.4843 0.0043
6 -3 12 1.6301 0.0140
6 -3 13 -0.5984 -0.0120
6 -3 14 -0.7004 -0.0298
6 -3 15 0.3669 -0.0240
6 -3 16 -0.0396 -0.0416
6 -3 17 1.0702 -0.0229
6 -3 18 1.0472 0.0361
6 -3 19 -1.6935 0.0313
6 -3 20 -1.4102 -0.0121
6 -2 0 0.3162 -0.1818
6 -2 1 -0.2198 -0.4286
6 -2 2 -0.1944 -0.1031
6 -2 3 -3.0411 0.0798
6 -2 4 -5.8631 -0.0268
6 -2 5 -1.0274 -0.0002
6 -2 6 6.7370 0.0916
6 -2 7 7.2561 0.0481
6 -2 8 1.5267 0.0047
6 -2 9 -3.0029 0.0065
6 -2 10 -1.4285 -0.0046
6 -2 11 2.8801 -0.0015
6 -2 12 1.5778 -0.0151
6 -2 13 -2.4700 -0.0415
6 -2 14 -1.9853 -0.0221
6 -2 15 -1.4353 -0.0095
6 -2 16 -2.6757 -0.0117
6 -2 17 -1.0002 0.0190
6 -2 18 0.5592 0.0220
6 -2 19 0.3167 -0.0049
6 -2 20 1.4297 0.0180
6 -1 0 -8.5177 -0.5000
6 -1 1 -6.6438 -0.1268
6 -1 2 -1.1184 0.2215
6 -1 3 -2.1081 0.0916
6 -1 4 -5.4251 -0.0125
6 -1 5 -1.3899 0.0877
6 -1 6 3.9603 0.0662
6 -1 7 2.3095 -0.0264
6 -1 8 -2.4610 -0.0225
6 -1 9 -3.2582 -0.0178
6 -1 10 1.6842 -0.0284
6 -1 11 5.0701 -0.0212
6 -1 12 1.2128 -0.0349
6 -1 13 -1.1959 -0.0244
6 -1 14 2.0953 0.0063
6 -1 15 2.8501 -0.0018
6 -1 16 1.7612 0.0108
6 -1 17 2.4320 0.0465
6 -1 18 0.5898 0.0431
6 -1 19 -1.2921 0.0420
6 -1 20 0.3619 0.0472
6 0 0 6.4868 -0.1380
6 0 1 13.1297 0.3551
6 0 2 11.0054 0.2415
6 0 3 -0.2140 -0.0388
6 0 4 -5.2581 0.0110
6 0 5 0.8117 0.0585
6 0 6 4.2474 -0.0583
6 0 7 -0.4076 -0.0744
6 0 8 -5.3161 -0.0187
6 0 9 -5.1464 -0.0226
6 0 10 -1.3001 -0.0141
6 0 11 -0.1667 0.0012
6 0 12 -2.4207 0.0005
6 0 13 -1.0964 0.0259
6 0 14 1.0309 0.0275
6 0 15 -1.1347 0.0129
6 0 16 -1.3966 0.0386
6 0 17 0.5599 0.0333
6 0 18 -0.1369 -0.0047
6 0 19 0.4747 -0.0048
6 0 20 2.1361 -0.0088
6 0 21 0.2359 -0.0357
6 1 0 -3.5751 0.4154
6 1 1 -2.1436 0.3290
6 1 2 -3.3245 -0.1035
6 1 3 -6.0003 -0.1290
6 1 4 -0.5825 0.0329
6 1 5 9.1436 -0.0403
6 1 6 9.3581 -0.1033
6 1 7 1.8108 -0.0085
6 1 8 -2.1569 0.0284
6 1 9 1.0472 0.0096
6 1 10 5.6779 0.0252
6 1 11 3.5196 0.0216
6 1 12 -2.4091 0.0178
6 1 13 -3.2627 0.0276
6 1 14 -1.9345 0.0098
6 1 15 -1.9941 0.0111
6 1 16 -0.3293 0.0130
6 1 17 0.5909 -0.0290
6 1 18 -0.2261 -0.0288
6 1 19 0.6894 -0.0026
6 1 20 0.1086 -0.0320
6 1 21 -2.6021 -0.0464
6 2 0 -4.8065 0.4083
6 2 1 -1.2815 -0.1299
6 2 2 -3.5647 -0.2770
6 2 3 -7.4664 -0.0331
6 2 4 -3.4421 -0.0066
6 2 5 0.6257 -0.0985
6 2 6 -3.2241 0.0041
6 2 7 -5.3296 0.0958
6 2 8 0.0387 0.0417
6 2 9 5.6081 0.0117
6 2 10 4.6340 0.0243
6 2 11 -1.1740 0.0144
6 2 12 -2.7401 0.0054
6 2 13 1.6515 -0.0171
6 2 14 3.3507 -0.0319
6 2 15 2.0663 -0.0088
6 2 16 2.0843 -0.0176
6 2 17 0.5967 -0.0296
6 2 18 -1.3424 0.0080
6 2 19 -0.3215 0.0048
6 2 20 0.6419 -0.0105
6 2 21 0.6797 0.0382
6 3 0 10.6816 -0.1741
6 3 1 14.3046 -0.4197
6 3 2 7.7622 -0.0778
6 3 3 1.1999 0.1172
6 3 4 2.9629 -0.0046
6 3 5 3.9021 0.0037
6 3 6 -0.1078 0.1056
6 3 7 -2.4564 0.0554
6 3 8 -2.9234 -0.0161
6 3 9 -4.2302 -0.0006
6 3 10 -5.8294 0.0011
6 3 11 -6.1147 -0.0228
6 3 12 -2.7592 -0.0350
6 3 13 1.4445 -0.0377
6 3 14 1.9756 -0.0125
6 3 15 1.3219 -0.0042
6 3 16 0.7636 -0.0311
6 3 17 -0.6701 -0.0057
6 3 18 0.3198 0.0258
6 3 19 2.2355 -0.0029
6 3 20 0.2749 0.0150
6 3 21 -2.2173 0.0455
6 4 0 -3.0994 -0.5081
6 4 1 -4.6572 -0.1229
6 4 2 -9.2883 0.2374
6 4 3 -6.0825 0.1094
6 4 4 3.7663 -0.0047
6 4 5 6.9738 0.0934
6 4 6 4.1166 0.0741
6 4 7 3.2434 -0.0453
6 4 8 3.6643 -0.0535
6 4 9 3.2074 -0.0146
6 4 10 1.9985 -0.0183
6 4 11 0.7321 -0.0268
6 4 12 0.7195 -0.0262
6 4 13 0.2888 -0.0063
6 4 14 -1.5399 0.0257
6 4 15 -2.5358 0.0175
6 4 16 -2.9089 0.0087
6 4 17 -2.7472 0.0299
6 4 18 -1.2008 0.0047
6 4 19 -0.8938 -0.0129
6 4 20 -1.9396 0.0385
6 4 21 -1.3305 0.0171
6 5 0 2.9794 -0.1250
6 5 1 -0.0161 0.3439
6 5 2 -4.8694 0.2277
6 5 3 -2.7731 -0.0482
6 5 4 0.3957 -0.0030
6 5 5 -2.7276 0.0429
6 5 6 -5.4912 -0.0713
6 5 7 -3.8930 -0.0914
6 5 8 -1.2221 -0.0214
6 5 9 1.5014 -0.0164
6 5 10 2.4393 -0.0331
6 5 11 0.7731 -0.0122
6 5 12 0.1983 0.0161
6 5 13 1.4187 0.0344
6 5 14 1.6240 0.0233
6 5 15 0.3261 -0.0041
6 5 16 -0.4938 0.0084
6 5 17 0.6739 0.0141
6 5 18 2.0634 -0.0226
6 5 19 1.6524 -0.0056
6 5 20 1.0550 0.0291
6 5 21 1.3873 -0.0150
6 6 0 8.0728 0.4056
6 6 1 6.4987 0.3140
6 6 2 4.1624 -0.1003
6 6 3 5.0400 -0.1239
6 6 4 4.0823 0.0189
6 6 5 0.4869 -0.0638
6 6 6 -1.7522 -0.1190
6 6 7 -3.1465 -0.0157
6 6 8 -3.5589 0.0291
6 6 9 -2.9598 0.0028
6 6 10 -4.3469 0.0178
6 6 11 -5.1909 0.0398
6 6 12 -1.7779 0.0254
6 6 13 1.4773 0.0058
6 6 14 1.0908 -0.0042
6 6 15 0.3588 -0.0024
6 6 16 1.1736 -0.0010
6 6 17 1.4592 -0.0308
6 6 18 0.7106 -0.0332
6 6 19 0.6493 0.0296
6 6 20 0.8754 0.0397
6 6 21 0.1894 0.0008
6 7 0 -3.5125 0.3485
6 7 1 -8.1297 -0.1430
6 7 2 -8.7790 -0.2595
6 7 3 -2.8170 -0.0171
6 7 4 3.1986 -0.0082
6 7 5 4.9906 -0.1024
6 7 6 4.3477 -0.0010
6 7 7 4.5086 0.0754
6 7 8 6.1734 0.0231
6 7 9 5.2986 0.0186
6 7 10 1.3971 0.0605
6 7 11 0.1833 0.0439
6 7 12 1.5324 -0.0035
6 7 13 0.5610 -0.0145
6 7 14 -1.6913 -0.0038
6 7 15 -2.1207 -0.0068
6 7 16 -1.7518 -0.0231
6 7 17 -1.8001 -0.0304
6 7 18 -1.4255 0.0060
6 7 19 -1.1556 0.0427
6 7 20 -1.9769 0.0199
6 7 21 -1.8178 0.0187
6 8 0 3.4012 -0.1971
6 8 1 0.1358 -0.4144
6 8 2 0.2259 -0.0817
6 8 3 2.2954 0.0978
6 8 4 -0.1771 -0.0226
6 8 5 -5.3554 0.0071
6 8 6 -7.2833 0.1084
6 8 7 -5.1898 0.0486
6 8 8 -2.6635 -0.0061
6 8 9 -2.1658 0.0204
6 8 10 -1.4912 0.0097
6 8 11 0.8558 -0.0354
6 8 12 2.0753 -0.0415
6 8 13 1.3316 -0.0124
6 8 14 0.7423 -0.0078
6 8 15 0.8104 -0.0253
6 8 16 1.0067 -0.0186
6 8 17 1.6243 0.0037
6 8 18 2.6557 0.0234
6 8 19 2.7718 0.0218
6 8 20 1.8431 0.0148
6 8 21 1.5632 0.0476
6 9 0 3.2961 -0.4655
6 9 1 1.4511 -0.0995
6 9 2 2.6488 0.2335
6 9 3 4.3716 0.0948
6 9 4 3.5081 -0.0146
6 9 5 2.1182 0.0893
6 9 6 1.2678 0.0660
6 9 7 0.6074 -0.0308
6 9 8 0.2082 -0.0178
6 9 9 -0.1764 -0.0057
6 9 10 -0.2086 -0.0392
6 9 11 -0.0801 -0.0507
6 9 12 -0.4351 -0.0273
6 9 13 -0.8240 0.0043
6 9 14 -0.8533 0.0040
6 9 15 -0.4146 0.0025
6 9 16 0.2484 0.0239
6 9 17 0.4227 0.0259
6 9 18 -0.0537 0.0244
6 9 19 -1.0089 0.0284
6 9 20 -1.2352 0.0282
6 10 0 -4.9110 -0.0964
6 10 1 -7.6477 0.3217
6 10 2 -4.1317 0.2121
6 10 3 -1.1209 -0.0335
6 10 4 -1.6419 0.0247
6 10 5 -2.2459 0.0576
6 10 6 -0.9935 -0.0700
6 10 7 1.4064 -0.0809
6 10 8 2.9386 -0.0214
6 10 9 2.7356 -0.0262
6 10 10 1.8473 -0.0176
6 10 11 0.5586 0.0117
6 10 12 -0.6375 0.0317
6 10 13 -0.8808 0.0321
6 10 14 -0.5605 0.0055
6 10 15 0.0118 0.0145
6 10 16 0.3376 0.0283
6 10 17 -0.3177 -0.0050
6 10 18 -1.6190 -0.0096
6 10 19 -2.6300 0.0056
6 10 20 -2.1778 0.0040
6 11 0 -0.1321 0.3733
6 11 1 1.2898 0.2934
6 11 2 2.7930 -0.0776
6 11 3 1.0942 -0.1083
6 11 4 0.1456 0.0128
6 11 5 1.1377 -0.0718
6 11 6 0.8737 -0.1131
6 11 7 -0.3379 -0.0076
6 11 8 -0.6044 0.0138
6 11 9 -0.5193 -0.0038
6 11 10 -1.6141 0.0316
6 11 11 -2.7144 0.0407
6 11 12 -1.0283 0.0298
6 11 13 1.6469 0.0060
6 11 14 1.9032 -0.0163
6 11 15 0.8852 0.0045
6 11 16 0.0805 -0.0134
6 11 17 -0.6731 -0.0454
6 11 18 -0.5640 -0.0125
6 11 19 0.8414 -0.0122
6 11 20 2.3980 -0.0206
6 12 0 -3.1673 0.2892
6 12 1 -0.9464 -0.1471
6 12 2 0.5571 -0.2483
6 12 3 1.3041 -0.0233
6 12 4 2.5175 -0.0084
6 12 5 1.6874 -0.1040
6 12 6 -1.0965 -0.0062
6 12 7 -2.1258 0.0726
6 12 8 -1.5729 0.0203
6 12 9 -1.5883 0.0261
6 12 10 -1.6774 0.0481
6 12 11 -0.2377 0.0108
6 12 12 1.2842 -0.0093
6 12 13 -0.3337 -0.0198
6 12 14 -2.5982 -0.0105
6 12 15 -1.2988 0.0068
6 12 16 0.6689 -0.0278
6 12 17 0.1256 -0.0133
6 12 18 -0.8579 0.0323
6 12 19 -0.6135 -0.0034
6 13 0 -2.6823 -0.1794
6 13 1 -1.7429 -0.3550
6 13 2 -1.3374 -0.0693
6 13 3 -1.0920 0.0839
6 13 4 -0.4833 -0.0236
6 13 5 -1.8758 0.0129
6 13 6 -3.1966 0.1283
6 13 7 -1.1772 0.0609
6 13 8 1.9357 -0.0125
6 13 9 3.0508 0.0222
6 13 10 2.2780 0.0019
6 13 11 1.6854 -0.0452
6 13 12 1.4109 -0.0401
6 13 13 0.1748 -0.0321
6 13 14 -0.0692 -0.0052
6 13 15 0.9178 0.0077
6 13 16 -0.3379 -0.0097
6 13 17 -2.2908 0.0167
6 13 18 -1.0587 0.0041
6 14 0 -1.1678 -0.3909
6 14 1 1.3350 -0.0766
6 14 2 1.1895 0.2035
6 14 3 1.4638 0.0963
6 14 4 1.6050 0.0040
6 14 5 -0.4838 0.0821
6 14 6 -0.9875 0.0498
6 14 7 0.7262 -0.0517
6 14 8 0.4862 -0.0254
6 14 9 -1.5421 0.0046
6 14 10 -2.1068 -0.0400
6 14 11 -0.8267 -0.0276
6 14 12 -0.9448 0.0118
6 14 13 -2.4641 0.0091
6 14 14 -0.7707 0.0135
6 14 15 2.2248 0.0110
6 14 16 1.0743 0.0249
6 14 17 -1.2677 0.0588
6 14 18 -0.8831 0.0092
6 15 0 0.9172 -0.0509
6 15 1 1.8017 0.2778
6 15 2 -0.0968 0.1659
6 15 3 -0.6706 -0.0349
6 15 4 -0.7606 0.0080
6 15 5 -0.5613 0.0300
6 15 6 1.4353 -0.0689
6 15 7 2.0653 -0.0773
6 15 8 0.5256 -0.0183
6 15 9 0.0483 -0.0238
6 15 10 0.2691 -0.0236
6 15 11 -0.5682 0.0193
6 15 12 -1.4713 0.0224
6 15 13 0.3938 0.0155
6 15 14 3.8530 0.0316
6 15 15 2.4656 0.0150
6 15 16 -2.2049 -0.0097
6 15 17 -1.2678 -0.0440
6 16 0 1.0361 0.3059
6 16 1 -1.7636 0.1908
6 16 2 -3.9625 -0.1019
6 16 3 -2.1748 -0.0859
6 16 4 -0.0690 0.0032
6 16 5 -0.0225 -0.0734
6 16 6 -1.0826 -0.0816
6 16 7 -2.1642 0.0124
6 16 8 -0.9155 0.0241
6 16 9 1.3539 0.0001
6 16 10 1.6426 0.0328
6 16 11 1.6365 0.0518
6 16 12 2.2469 0.0177
6 16 13 1.7413 -0.0081
6 16 14 -0.7191 -0.0042
6 16 15 -3.7109 0.0197
6 16 16 -2.8186 0.0436
6 17 0 2.7795 0.2256
6 17 1 0.1194 -0.1458
6 17 2 -1.5029 -0.1819
6 17 3 1.0582 0.0169
6 17 4 2.6760 -0.0013
6 17 5 2.3997 -0.0544
6 17 6 2.1670 0.0417
6 17 7 1.9339 0.0574
6 17 8 1.3472 0.0002
6 17 9 -0.6140 0.0278
6 17 10 -2.1154 0.0484
6 17 11 -1.0405 -0.0017
6 17 12 -0.2442 -0.0266
6 17 13 -0.5769 0.0073
6 17 14 -0.2968 0.0298
6 18 0 -3.1196 -0.1791
6 18 1 -6.0479 -0.3157
6 18 2 -2.4290 -0.0347
6 18 3 2.2782 0.0803
6 18 4 2.2044 -0.0420
6 18 5 0.4929 0.0015
6 18 6 -0.5989 0.0846
6 18 7 -0.9984 0.0157
6 18 8 -0.1845 -0.0059
6 18 9 0.5643 0.0297
6 18 10 1.2683 -0.0046
6 18 11 1.6602 -0.0322
6 18 12 0.4914 -0.0251
6 19 3 1.5175 0.0610
6 19 4 0.8231 -0.0268
6 19 5 1.0647 0.0808
6 19 6 0.9708 0.0396
6 19 7 0.8161 -0.0725
6 19 8 0.0771 -0.0280
7 -16 0 -0.9527 0.1569
7 -16 1 -3.7336 -0.0842
7 -16 2 -3.4167 -0.0985
7 -16 3 0.2437 -0.0951
7 -16 4 2.0114 -0.0643
7 -15 0 0.5741 -0.2082
7 -15 1 1.0204 -0.2062
7 -15 2 2.4219 -0.0329
7 -15 3 2.9923 0.0034
7 -15 4 0.7571 0.0428
7 -15 5 -1.7253 0.0665
7 -15 6 -0.9964 0.0310
7 -15 7 -0.1132 0.0514
7 -14 0 -3.2003 -0.2481
7 -14 1 -2.8024 0.0640
7 -14 2 -1.2830 0.1244
7 -14 3 -0.3742 0.0277
7 -14 4 -1.7346 0.0334
7 -14 5 -1.7397 0.0335
7 -14 6 1.8805 0.0266
7 -14 7 4.4150 0.0277
7 -14 8 3.3945 -0.0544
7 -14 9 0.4056 -0.0979
7 -13 0 -1.1888 0.1037
7 -13 1 -0.6650 0.2924
7 -13 2 1.0850 0.0881
7 -13 3 0.6741 -0.0233
7 -13 4 -1.8469 -0.0056
7 -13 5 -1.3598 -0.0329
7 -13 6 1.1237 -0.0309
7 -13 7 0.7108 -0.0259
7 -13 8 -1.0918 -0.0514
7 -13 9 -1.6446 -0.0194
7 -13 10 -1.3706 0.0096
7 -13 11 -0.9954 -0.0025
7 -12 0 -0.2180 0.3780
7 -12 1 1.7686 0.1320
7 -12 2 2.5867 -0.1055
7 -12 3 0.5398 -0.0616
7 -12 4 -0.5574 -0.0488
7 -12 5 1.7950 -0.0752
7 -12 6 3.1290 -0.0196
7 -12 7 1.3400 0.0065
7 -12 8 -0.6600 -0.0004
7 -12 9 -1.7254 0.0130
7 -12 10 -1.1503 -0.0064
7 -12 11 1.0506 -0.0285
7 -12 12 2.1031 -0.0144
7 -11 0 -1.2757 0.1943
7 -11 1 0.2165 -0.2061
7 -11 2 0.7881 -0.1983
7 -11 3 -0.8423 -0.0644
7 -11 4 -1.7671 -0.0569
7 -11 5 -0.8491 -0.0062
7 -11 6 -0.0735 0.0566
7 -11 7 0.8172 0.0380
7 -11 8 1.4921 0.0262
7 -11 9 0.5970 0.0211
7 -11 10 -0.6010 -0.0046
7 -11 11 -1.5477 0.0043
7 -11 12 -2.1090 0.0234
7 -11 13 -0.6353 0.0117
7 -11 14 1.8649 -0.0109
7 -10 0 -0.5484 -0.2866
7 -10 1 0.5244 -0.2844
7 -10 2 -0.2806 0.0130
7 -10 3 -2.2338 0.0613
7 -10 4 -1.2326 -0.0022
7 -10 5 1.1941 0.0386
7 -10 6 2.1527 0.0621
7 -10 7 1.2495 0.0440
7 -10 8 -1.7875 0.0228
7 -10 9 -3.9093 -0.0179
7 -10 10 -1.7809 -0.0281
7 -10 11 1.6836 -0.0103
7 -10 12 3.2379 -0.0169
7 -10 13 2.8345 -0.0071
7 -10 14 0.6058 0.0279
7 -10 15 -1.6885 0.0256
7 -9 0 0.2973 -0.3774
7 -9 1 2.0254 0.0554
7 -9 2 2.2259 0.2165
7 -9 3 1.7339 0.0645
7 -9 4 1.4759 0.0336
7 -9 5 0.8556 0.0719
7 -9 6 0.4691 0.0295
7 -9 7 -0.5068 -0.0157
7 -9 8 -2.3440 -0.0432
7 -9 9 -1.6719 -0.0520
7 -9 10 0.8557 -0.0359
7 -9 11 0.9948 -0.0390
7 -9 12 -0.3921 -0.0279
7 -9 13 -1.1330 0.0208
7 -9 14 -1.5258 0.0313
7 -9 15 -0.8723 0.0108
7 -9 16 0.5844 0.0298
7 -8 0 -0.1055 0.1148
7 -8 1 2.1960 0.3657
7 -8 2 -0.2925 0.1176
7 -8 3 -3.5174 -0.0525
7 -8 4 -2.8366 0.0010
7 -8 5 0.3179 -0.0064
7 -8 6 2.2402 -0.0480
7 -8 7 1.1960 -0.0442
7 -8 8 0.0326 -0.0381
7 -8 9 1.6841 -0.0163
7 -8 10 2.9970 -0.0023
7 -8 11 1.0707 -0.0001
7 -8 12 -1.3598 0.0382
7 -8 13 -1.5150 0.0540
7 -8 14 0.3756 0.0151
7 -8 15 1.9205 -0.0054
7 -8 16 0.5531 -0.0100
7 -8 17 -2.0867 -0.0331
7 -7 0 3.2070 0.4678
7 -7 1 1.7862 0.1753
7 -7 2 -1.2507 -0.1579
7 -7 3 -0.6552 -0.1126
7 -7 4 1.7291 -0.0506
7 -7 5 1.8269 -0.0993
7 -7 6 -0.1689 -0.0720
7 -7 7 -2.5065 -0.0118
7 -7 8 -2.7966 0.0200
7 -7 9 -0.3261 0.0338
7 -7 10 1.3528 0.0148
7 -7 11 0.6202 0.0272
7 -7 12 0.7385 0.0619
7 -7 13 2.4529 0.0279
7 -7 14 1.7977 -0.0156
7 -7 15 -1.8949 -0.0107
7 -7 16 -3.4921 -0.0112
7 -7 17 -0.6498 -0.0213
7 -6 0 0.7281 0.1806
7 -6 1 -0.7731 -0.2708
7 -6 2 -1.3845 -0.2215
7 -6 3 1.3549 -0.0138
7 -6 4 4.2890 -0.0317
7 -6 5 4.3700 -0.0398
7 -6 6 1.2840 0.0459
7 -6 7 -2.3273 0.0700
7 -6 8 -2.1369 0.0500
7 -6 9 0.7687 0.0180
7 -6 10 0.4795 -0.0029
7 -6 11 -2.7996 0.0254
7 -6 12 -3.4247 0.0143
7 -6 13 -1.5568 -0.0399
7 -6 14 -1.1104 -0.0276
7 -6 15 -0.5132 0.0058
7 -6 16 1.7688 -0.0070
7 -6 17 1.8711 -0.0205
7 -6 18 -0.3134 -0.0080
7 -5 0 2.7798 -0.3734
7 -5 1 -1.0145 -0.3575
7 -5 2 -2.6848 0.0128
7 -5 3 -1.4116 0.0887
7 -5 4 -0.9109 0.0057
7 -5 5 -3.1952 0.0640
7 -5 6 -5.4873 0.1033
7 -5 7 -3.5693 0.0545
7 -5 8 2.0801 0.0177
7 -5 9 5.5816 -0.0112
7 -5 10 3.2940 -0.0122
7 -5 11 -0.4483 -0.0016
7 -5 12 -0.1874 -0.0375
7 -5 13 1.5988 -0.0395
7 -5 14 0.9696 0.0066
7 -5 15 0.2190 -0.0018
7 -5 16 0.2187 -0.0284
7 -5 17 -0.7725 -0.0046
7 -5 18 -0.4755 0.0324
7 -5 19 0.9834 0.0415
7 -4 0 -1.4225 -0.4290
7 -4 1 -3.2781 0.0673
7 -4 2 0.6928 0.2491
7 -4 3 5.9235 0.0587
7 -4 4 6.0315 0.0148
7 -4 5 0.7996 0.0750
7 -4 6 -3.2128 0.0213
7 -4 7 -2.2110 -0.0304
7 -4 8 0.7284 -0.0358
7 -4 9 1.0629 -0.0470
7 -4 10 -1.8931 -0.0323
7 -4 11 -3.2741 -0.0199
7 -4 12 -0.1598 -0.0148
7 -4 13 1.7116 0.0215
7 -4 14 -0.3176 0.0231
7 -4 15 -0.8195 -0.0087
7 -4 16 0.0508 0.0078
7 -4 17 -0.6995 0.0244
7 -4 18 -0.4049 -0.0074
7 -4 19 0.5611 -0.0285
7 -3 0 -5.7779 0.1376
7 -3 1 -3.6858 0.4249
7 -3 2 0.3512 0.1505
7 -3 3 3.0365 -0.0429
7 -3 4 1.0737 0.0187
7 -3 5 -3.1641 -0.0112
7 -3 6 -3.6270 -0.0855
7 -3 7 0.0845 -0.0530
7 -3 8 3.7260 -0.0229
7 -3 9 3.5406 -0.0169
7 -3 10 -0.7527 0.0075
7 -3 11 -3.1153 0.0160
7 -3 12 -0.5679 0.0262
7 -3 13 0.9045 0.0319
7 -3 14 0.1508 0.0083
7 -3 15 0.4098 0.0099
7 -3 16 -1.0038 0.0136
7 -3 17 -2.6416 -0.0294
7 -3 18 -0.1373 -0.0356
7 -3 19 1.6594 0.0179
7 -3 20 0.1990 0.0279
7 -2 0 -3.2685 0.4998
7 -2 1 -0.2262 0.1707
7 -2 2 4.2205 -0.1742
7 -2 3 4.7367 -0.0963
7 -2 4 -2.0952 -0.0215
7 -2 5 -8.6774 -0.0961
7 -2 6 -6.3875 -0.0616
7 -2 7 1.0917 0.0194
7 -2 8 5.2717 0.0159
7 -2 9 2.6299 0.0112
7 -2 10 -2.5862 0.0243
7 -2 11 -1.9154 0.0320
7 -2 12 2.7082 0.0379
7 -2 13 2.1767 0.0068
7 -2 14 -0.7573 -0.0230
7 -2 15 -0.3833 -0.0183
7 -2 16 0.4553 -0.0386
7 -2 17 1.3198 -0.0467
7 -2 18 2.0188 0.0047
7 -2 19 -0.3019 0.0239
7 -2 20 -1.7889 -0.0110
7 -1 0 3.9099 0.1554
7 -1 1 4.9707 -0.3104
7 -1 2 4.2115 -0.2348
7 -1 3 1.2062 -0.0045
7 -1 4 -3.2058 -0.0365
7 -1 5 -3.1280 -0.0542
7 -1 6 1.7750 0.0524
7 -1 7 4.3937 0.0720
7 -1 8 2.1193 0.0317
7 -1 9 -2.8459 0.0239
7 -1 10 -5.6289 0.0145
7 -1 11 -1.7592 0.0064
7 -1 12 2.5532 -0.0131
7 -1 13 0.8990 -0.0412
7 -1 14 -0.5779 -0.0212
7 -1 15 0.4356 -0.0072
7 -1 16 -0.3404 -0.0326
7 -1 17 -0.5439 -0.0168
7 -1 18 0.6464 0.0106
7 -1 19 0.4420 -0.0046
7 -1 20 0.4503 0.0012
7 0 0 -3.0662 -0.4041
7 0 1 -3.4652 -0.3450
7 0 2 2.0508 0.0379
7 0 3 4.4359 0.0896
7 0 4 -0.4640 -0.0171
7 0 5 -3.2441 0.0531
7 0 6 -0.0451 0.1087
7 0 7 3.2782 0.0406
7 0 8 2.7283 -0.0052
7 0 9 -1.0987 -0.0150
7 0 10 -2.0360 -0.0174
7 0 11 2.5867 -0.0121
7 0 12 3.5273 -0.0339
7 0 13 -1.3516 -0.0350
7 0 14 -2.6604 -0.0000
7 0 15 -1.1319 -0.0061
7 0 16 -1.6089 -0.0115
7 0 17 -1.3516 0.0234
7 0 18 -0.8548 0.0322
7 0 19 -1.4009 0.0358
7 0 20 -0.4025 0.0549
7 0 21 0.6974 0.0363
7 1 0 -5.5045 -0.4042
7 1 1 -1.8413 0.1023
7 1 2 1.5114 0.2592
7 1 3 -3.0884 0.0550
7 1 4 -8.8232 0.0167
7 1 5 -5.9694 0.0836
7 1 6 1.0798 0.0122
7 1 7 4.0285 -0.0600
7 1 8 1.6277 -0.0470
7 1 9 -2.0655 -0.0335
7 1 10 -0.4943 -0.0212
7 1 11 4.2824 -0.0148
7 1 12 3.2738 -0.0135
7 1 13 -0.0757 0.0250
7 1 14 1.2167 0.0383
7 1 15 2.2533 0.0048
7 1 16 1.1752 0.0105
7 1 17 1.2497 0.0251
7 1 18 0.3082 0.0112
7 1 19 -0.8414 0.0187
7 1 20 0.5026 0.0139
7 1 21 1.2809 -0.0098
7 2 0 5.3641 0.1741
7 2 1 9.1352 0.4135
7 2 2 8.7382 0.1133
7 2 3 1.0114 -0.0551
7 2 4 -5.0493 0.0323
7 2 5 -1.7552 -0.0021
7 2 6 3.8790 -0.0978
7 2 7 2.4571 -0.0648
7 2 8 -4.5992 -0.0144
7 2 9 -7.8578 -0.0059
7 2 10 -2.5304 0.0094
7 2 11 2.3277 0.0119
7 2 12 -0.5241 0.0223
7 2 13 -3.0548 0.0446
7 2 14 -1.0820 0.0229
7 2 15 -0.4642 0.0039
7 2 16 -0.8146 0.0085
7 2 17 0.2937 -0.0199
7 2 18 1.3549 -0.0270
7 2 19 2.9587 -0.0006
7 2 20 3.4450 -0.0244
7 2 21 0.5696 -0.0435
7 3 0 -8.2444 0.5080
7 3 1 -4.8338 0.1270
7 3 2 -2.9362 -0.2057
7 3 3 -3.5938 -0.0920
7 3 4 -0.0045 -0.0117
7 3 5 7.2010 -0.0932
7 3 6 8.1194 -0.0531
7 3 7 2.3579 0.0381
7 3 8 -0.7955 0.0317
7 3 9 2.8623 0.0230
7 3 10 7.6598 0.0392
7 3 11 5.4637 0.0369
7 3 12 -1.3246 0.0398
7 3 13 -3.7594 0.0206
7 3 14 -2.4730 -0.0190
7 3 15 -1.8173 -0.0199
7 3 16 -0.7563 -0.0254
7 3 17 -0.5174 -0.0396
7 3 18 -2.4158 -0.0038
7 3 19 -3.3400 0.0028
7 3 20 -2.9335 -0.0330
7 3 21 -2.3510 0.0078
7 4 0 1.5099 0.1167
7 4 1 3.3126 -0.3458
7 4 2 0.2702 -0.2126
7 4 3 -6.2917 0.0342
7 4 4 -7.4440 -0.0288
7 4 5 -3.1318 -0.0577
7 4 6 -1.0787 0.0603
7 4 7 -2.1289 0.0811
7 4 8 -1.9861 0.0381
7 4 9 0.6590 0.0375
7 4 10 2.2035 0.0181
7 4 11 -0.6987 -0.0111
7 4 12 -3.3126 -0.0171
7 4 13 -0.3641 -0.0353
7 4 14 3.7930 -0.0383
7 4 15 4.3751 -0.0266
7 4 16 2.5069 -0.0408
7 4 17 0.4333 -0.0152
7 4 18 0.8354 0.0345
7 4 19 3.3109 0.0086
7 4 20 3.2997 -0.0050
7 4 21 0.9206 0.0472
7 5 0 2.5497 -0.4127
7 5 1 5.5611 -0.3129
7 5 2 4.7885 0.0957
7 5 3 1.4698 0.1160
7 5 4 2.7854 -0.0109
7 5 5 5.2571 0.0681
7 5 6 1.5955 0.1053
7 5 7 -4.3497 0.0075
7 5 8 -5.6420 -0.0249
7 5 9 -3.1013 -0.0057
7 5 10 -1.7289 -0.0213
7 5 11 -2.2048 -0.0322
7 5 12 -1.0238 -0.0375
7 5 13 1.1989 -0.0381
7 5 14 1.1256 -0.0056
7 5 15 -0.0337 0.0060
7 5 16 -0.3095 -0.0026
7 5 17 -0.2868 0.0269
7 5 18 -0.3239 0.0224
7 5 19 -1.3718 -0.0201
7 5 20 -3.2366 0.0094
7 5 21 -2.9996 0.0367
7 6 0 -5.7713 -0.3594
7 6 1 -3.1987 0.1522
7 6 2 -5.6143 0.2760
7 6 3 -5.8925 0.0329
7 6 4 1.9979 0.0056
7 6 5 7.7935 0.0906
7 6 6 5.9304 0.0084
7 6 7 3.8604 -0.0618
7 6 8 4.8104 -0.0260
7 6 9 5.1669 -0.0235
7 6 10 3.2778 -0.0504
7 6 11 0.3278 -0.0368
7 6 12 -1.9327 -0.0036
7 6 13 -2.2130 0.0311
7 6 14 -1.0453 0.0412
7 6 15 -0.9551 0.0094
7 6 16 -2.6217 0.0086
7 6 17 -3.1213 0.0340
7 6 18 -1.7616 -0.0018
7 6 19 -1.1109 -0.0288
7 6 20 -0.9061 0.0013
7 6 21 0.2916 -0.0101
7 7 0 5.3561 0.1886
7 7 1 5.6917 0.3886
7 7 2 0.1910 0.0587
7 7 3 -2.3950 -0.1068
7 7 4 -2.1260 0.0181
7 7 5 -5.2527 0.0003
7 7 6 -8.4735 -0.0996
7 7 7 -7.4593 -0.0550
7 7 8 -4.3803 0.0026
7 7 9 -0.9283 -0.0218
7 7 10 1.5067 -0.0295
7 7 11 1.2799 0.0087
7 7 12 0.8361 0.0386
7 7 13 2.4345 0.0371
7 7 14 3.0563 0.0120
7 7 15 0.9397 -0.0012
7 7 16 -0.0469 0.0180
7 7 17 1.5050 0.0064
7 7 18 1.9246 -0.0367
7 7 19 1.0391 -0.0196
7 7 20 1.5111 0.0039
7 7 21 2.3385 -0.0194
7 8 0 3.2708 0.4609
7 8 1 1.3122 0.0863
7 8 2 -1.5910 -0.2300
7 8 3 0.8805 -0.0888
7 8 4 5.5175 0.0165
7 8 5 6.3532 -0.0804
7 8 6 3.9478 -0.0685
7 8 7 1.1022 0.0176
7 8 8 -0.2179 0.0133
7 8 9 -0.7109 -0.0008
7 8 10 -2.6990 0.0365
7 8 11 -3.9638 0.0612
7 8 12 -1.4095 0.0350
7 8 13 1.4713 -0.0015
7 8 14 0.6468 -0.0074
7 8 15 -1.0081 -0.0008
7 8 16 -0.1812 -0.0112
7 8 17 0.3150 -0.0389
7 8 18 -1.3197 -0.0355
7 8 19 -1.9041 0.0053
7 8 20 -0.9149 0.0012
7 8 21 -0.3040 -0.0009
7 9 0 -1.8340 0.0936
7 9 1 -4.1581 -0.3225
7 9 2 -4.8529 -0.1914
7 9 3 -1.5879 0.0615
7 9 4 0.4809 0.0028
7 9 5 -0.8581 -0.0502
7 9 6 -1.3478 0.0420
7 9 7 0.9956 0.0579
7 9 8 3.5120 0.0223
7 9 9 3.3088 0.0326
7 9 10 1.7192 0.0386
7 9 11 1.5923 0.0126
7 9 12 1.6097 -0.0212
7 9 13 -0.1373 -0.0243
7 9 14 -1.8112 -0.0106
7 9 15 -1.5509 -0.0214
7 9 16 -0.6710 -0.0266
7 9 17 -0.8319 -0.0102
7 9 18 -0.5802 0.0071
7 9 19 0.9971 0.0083
7 9 20 1.4813 -0.0112
7 10 0 4.8691 -0.3717
7 10 1 2.9258 -0.2806
7 10 2 1.1208 0.0846
7 10 3 1.1796 0.1013
7 10 4 0.7003 -0.0230
7 10 5 -0.3095 0.0506
7 10 6 -0.8122 0.0929
7 10 7 -1.4751 0.0216
7 10 8 -2.3679 0.0078
7 10 9 -2.5706 0.0091
7 10 10 -1.0999 -0.0251
7 10 11 0.9496 -0.0457
7 10 12 1.4728 -0.0415
7 10 13 0.9819 -0.0077
7 10 14 0.6323 0.0072
7 10 15 0.5527 -0.0098
7 10 16 0.7771 0.0043
7 10 17 0.7589 0.0175
7 10 18 0.4808 0.0073
7 10 19 0.1595 0.0004
7 10 20 -0.2367 -0.0069
7 11 0 0.2222 -0.2974
7 11 1 -0.9085 0.1215
7 11 2 -0.0659 0.2185
7 11 3 1.8692 0.0185
7 11 4 1.3991 0.0147
7 11 5 -0.2326 0.0839
7 11 6 -0.7114 -0.0138
7 11 7 -0.1672 -0.0659
7 11 8 -0.0988 -0.0241
7 11 9 -0.4650 -0.0357
7 11 10 0.3219 -0.0436
7 11 11 0.7509 -0.0215
7 11 12 -0.7717 -0.0053
7 11 13 -1.8738 0.0191
7 11 14 -1.4234 0.0117
7 11 15 -0.5834 0.0064
7 11 16 0.0035 0.0345
7 11 17 0.0228 0.0162
7 11 18 -0.0333 -0.0085
7 11 19 0.0118 -0.0040
7 11 20 -0.0482 -0.0150
7 12 0 0.9394 0.1811
7 12 1 -1.7138 0.3280
7 12 2 -2.5774 0.0520
7 12 3 -3.0878 -0.0714
7 12 4 -3.0403 0.0404
7 12 5 -0.6649 0.0003
7 12 6 2.2051 -0.0975
7 12 7 2.8683 -0.0384
7 12 8 1.6165 0.0018
7 12 9 1.3238 -0.0213
7 12 10 2.0812 0.0060
7 12 11 0.6915 0.0241
7 12 12 -0.7881 0.0270
7 12 13 0.8750 0.0335
7 12 14 2.0098 0.0034
7 12 15 0.7109 0.0058
7 12 16 -0.1158 0.0161
7 12 17 -0.1894 -0.0286
7 12 18 -0.7326 -0.0266
7 12 19 -1.3837 -0.0082
7 13 0 2.1397 0.3900
7 13 1 1.1208 0.0773
7 13 2 1.1843 -0.1790
7 13 3 1.2004 -0.0560
7 13 4 1.4762 0.0164
7 13 5 2.0189 -0.0996
7 13 6 1.1717 -0.0819
7 13 7 -1.1474 0.0281
7 13 8 -2.9978 0.0220
7 13 9 -2.6100 0.0096
7 13 10 -2.0172 0.0359
7 13 11 -2.9235 0.0199
7 13 12 -1.8552 0.0122
7 13 13 0.5059 0.0013
7 13 14 -0.1019 -0.0254
7 13 15 -0.8282 -0.0096
7 13 16 0.4732 -0.0238
7 13 17 0.1503 -0.0376
7 13 18 -1.6234 0.0243
7 14 0 -1.3568 0.0650
7 14 1 -1.9845 -0.2949
7 14 2 -1.2847 -0.1898
7 14 3 -1.8472 0.0260
7 14 4 -1.7631 -0.0230
7 14 5 -0.0901 -0.0620
7 14 6 0.6773 0.0542
7 14 7 -0.4513 0.0765
7 14 8 -1.4619 0.0070
7 14 9 -0.6106 0.0193
7 14 10 0.1496 0.0344
7 14 11 0.6651 -0.0013
7 14 12 2.9263 -0.0137
7 14 13 2.8730 -0.0232
7 14 14 -0.9855 -0.0153
7 14 15 -2.2372 0.0119
7 14 16 -0.5394 -0.0081
7 14 17 -0.0051 -0.0018
7 14 18 0.6051 0.0127
7 15 0 -2.1721 -0.3002
7 15 1 -1.8548 -0.2410
7 15 2 -1.4768 0.0651
7 15 3 -1.8996 0.0953
7 15 4 -0.2095 -0.0043
7 15 5 0.6640 0.0490
7 15 6 -1.4791 0.0860
7 15 7 -3.0836 0.0065
7 15 8 -1.2257 -0.0153
7 15 9 1.9828 0.0183
7 15 10 2.5210 -0.0204
7 15 11 1.7129 -0.0592
7 15 12 1.3881 -0.0357
7 15 13 -1.0703 -0.0166
7 15 14 -2.4936 0.0004
7 15 15 0.9696 0.0130
7 15 16 2.6687 0.0186
7 15 17 -0.6920 0.0626
7 16 0 0.5708 -0.2381
7 16 1 4.3633 0.1021
7 16 2 2.9423 0.1920
7 16 3 0.0214 0.0282
7 16 4 -0.7775 0.0113
7 16 5 -0.8415 0.0664
7 16 6 0.3385 0.0032
7 16 7 2.0003 -0.0461
7 16 8 1.6043 -0.0115
7 16 9 -0.5416 -0.0094
7 16 10 -2.3927 -0.0421
7 16 11 -1.9089 -0.0230
7 16 12 -0.6993 0.0146
7 16 13 -0.7498 0.0211
7 16 14 1.0643 0.0237
7 16 15 2.9029 0.0129
7 17 0 -0.7357 0.1249
7 17 1 -1.3413 0.2646
7 17 2 -4.0153 0.0334
7 17 3 -4.6793 -0.0672
7 17 4 -2.7844 0.0264
7 17 5 -0.6834 -0.0106
7 17 6 0.5855 -0.0854
7 17 7 0.0726 -0.0370
7 17 8 -0.0539 0.0020
7 17 9 1.3758 -0.0241
7 17 10 1.3275 -0.0203
7 17 11 0.1878 0.0267
7 17 12 0.1129 0.0457
7 17 13 0.8959 0.0179
7 17 14 1.4423 -0.0061
7 18 1 3.6256 0.0432
7 18 2 -1.3333 -0.1788
7 18 3 -2.3135 -0.0533
7 18 4 0.4912 0.0098
7 18 5 2.7726 -0.0768
7 18 6 2.7707 -0.0404
7 18 7 1.0800 0.0198
7 18 8 0.0699 -0.0174
7 18 9 -0.9251 -0.0123
7 18 10 -1.9659 0.0471
7 18 11 0.4502 0.0564
8 -15 0 1.7398 0.2921
8 -15 1 0.6610 0.0214
8 -15 2 -2.5164 -0.0644
8 -15 3 -3.1848 -0.0712
8 -15 4 -0.1173 -0.1013
8 -15 5 1.8647 -0.0276
8 -15 6 1.9043 0.0278
8 -14 0 1.1996 -0.0613
8 -14 1 -0.7397 -0.2270
8 -14 2 -2.1050 -0.0755
8 -14 3 -0.3844 -0.0037
8 -14 4 1.0216 0.0146
8 -14 5 -1.3800 0.0523
8 -14 6 -3.7291 0.0271
8 -14 7 -3.0951 0.0443
8 -14 8 -0.6477 0.0827
8 -13 0 1.2133 -0.3379
8 -13 1 0.3910 -0.1034
8 -13 2 -0.4168 0.1074
8 -13 3 0.8431 0.0524
8 -13 4 1.2429 0.0144
8 -13 5 0.1278 0.0240
8 -13 6 0.6985 0.0302
8 -13 7 1.8463 0.0537
8 -13 8 1.3917 -0.0039
8 -13 9 -0.0971 -0.0776
8 -13 10 -2.4699 -0.0446
8 -12 0 0.4639 -0.1468
8 -12 1 -2.4313 0.2336
8 -12 2 -2.3866 0.1776
8 -12 3 -0.0106 0.0148
8 -12 4 -0.2727 0.0124
8 -12 5 -1.8636 0.0048
8 -12 6 -1.5651 -0.0215
8 -12 7 -0.2364 -0.0304
8 -12 8 1.5109 -0.0547
8 -12 9 2.5542 -0.0353
8 -12 10 1.0394 -0.0044
8 -12 11 -0.5727 -0.0130
8 -12 12 0.2650 0.0283
8 -11 0 -1.7486 0.2866
8 -11 1 -3.5284 0.2835
8 -11 2 -1.5582 0.0055
8 -11 3 0.5112 -0.0539
8 -11 4 0.2928 -0.0361
8 -11 5 -0.1569 -0.0798
8 -11 6 -0.0530 -0.0600
8 -11 7 0.0350 -0.0194
8 -11 8 0.2833 -0.0150
8 -11 9 -0.2438 -0.0039
8 -11 10 -1.0604 -0.0079
8 -11 11 -0.0096 -0.0091
8 -11 12 1.4323 0.0172
8 -11 13 0.4217 0.0209
8 -10 0 -0.8289 0.3626
8 -10 1 -0.2919 -0.0461
8 -10 2 2.3513 -0.1988
8 -10 3 2.9892 -0.0747
8 -10 4 0.7781 -0.0373
8 -10 5 -1.1040 -0.0360
8 -10 6 -1.3290 0.0063
8 -10 7 -0.1230 0.0177
8 -10 8 1.3901 0.0296
8 -10 9 1.0946 0.0416
8 -10 10 -0.8229 0.0199
8 -10 11 -2.2733 0.0187
8 -10 12 -2.2930 0.0305
8 -10 13 -1.1587 0.0070
8 -10 14 0.2695 -0.0233
8 -9 0 -3.4371 -0.0831
8 -9 1 -2.3393 -0.3243
8 -9 2 -0.4649 -0.1065
8 -9 3 -0.8896 0.0309
8 -9 4 -1.5668 -0.0259
8 -9 5 -1.2873 -0.0195
8 -9 6 -0.3008 0.0311
8 -9 7 1.9378 0.0557
8 -9 8 3.2658 0.0587
8 -9 9 1.2431 0.0187
8 -9 10 -1.3446 -0.0075
8 -9 11 -0.9953 0.0093
8 -9 12 1.1510 0.0022
8 -9 13 2.0858 -0.0158
8 -9 14 1.3032 -0.0041
8 -9 15 0.3486 -0.0083
8 -8 0 -1.1996 -0.4412
8 -8 1 0.2748 -0.1559
8 -8 2 1.8006 0.1535
8 -8 3 1.7492 0.0989
8 -8 4 0.0959 0.0256
8 -8 5 -1.3898 0.0585
8 -8 6 -0.1937 0.0506
8 -8 7 1.5185 0.0238
8 -8 8 -0.3648 -0.0053
8 -8 9 -3.1569 -0.0395
8 -8 10 -1.8023 -0.0374
8 -8 11 2.1215 -0.0332
8 -8 12 3.8738 -0.0339
8 -8 13 2.1375 -0.0014
8 -8 14 -0.7826 0.0179
8 -8 15 -1.8620 -0.0012
8 -8 16 -0.2611 0.0050
8 -7 0 -0.4553 -0.1780
8 -7 1 2.3071 0.2547
8 -7 2 2.4427 0.2183
8 -7 3 0.1071 0.0204
8 -7 4 -0.9726 0.0200
8 -7 5 1.3848 0.0276
8 -7 6 3.6467 -0.0174
8 -7 7 1.7513 -0.0257
8 -7 8 -1.5689 -0.0386
8 -7 9 -1.8282 -0.0410
8 -7 10 -0.4293 -0.0192
8 -7 11 -0.6228 -0.0121
8 -7 12 -2.2771 0.0117
8 -7 13 -3.1844 0.0381
8 -7 14 -1.3809 0.0219
8 -7 15 2.0186 0.0068
8 -7 16 2.6879 0.0136
8 -7 17 -1.1167 0.0098
8 -6 0 1.0085 0.3391
8 -6 1 0.5217 0.3299
8 -6 2 -1.7947 -0.0075
8 -6 3 -3.9392 -0.0796
8 -6 4 -3.2142 -0.0156
8 -6 5 -0.6179 -0.0624
8 -6 6 0.2850 -0.0776
8 -6 7 -0.2651 -0.0364
8 -6 8 0.3698 -0.0150
8 -6 9 1.9182 0.0102
8 -6 10 3.1388 0.0131
8 -6 11 3.6049 0.0099
8 -6 12 2.4524 0.0434
8 -6 13 0.6523 0.0465
8 -6 14 -0.1065 0.0118
8 -6 15 -0.9475 -0.0065
8 -6 16 -2.1587 -0.0154
8 -6 17 -1.6022 -0.0085
8 -6 18 1.0978 0.0023
8 -5 0 1.4825 0.3959
8 -5 1 1.3946 -0.0519
8 -5 2 0.5644 -0.2237
8 -5 3 1.2308 -0.0734
8 -5 4 4.8221 -0.0454
8 -5 5 6.8561 -0.0878
8 -5 6 3.5474 -0.0294
8 -5 7 -1.4179 0.0201
8 -5 8 -3.5849 0.0297
8 -5 9 -2.8886 0.0316
8 -5 10 -0.9338 0.0189
8 -5 11 -0.1568 0.0378
8 -5 12 -1.1272 0.0493
8 -5 13 -0.9317 0.0014
8 -5 14 0.5271 -0.0235
8 -5 15 0.9704 -0.0091
8 -5 16 1.0032 -0.0087
8 -5 17 0.7206 -0.0246
8 -5 18 -0.1993 -0.0633
8 -4 0 1.8147 -0.1157
8 -4 1 0.3290 -0.3851
8 -4 2 -3.1387 -0.1335
8 -4 3 -3.3882 0.0499
8 -4 4 0.1759 -0.0119
8 -4 5 1.1836 -0.0073
8 -4 6 -1.8229 0.0628
8 -4 7 -3.2845 0.0691
8 -4 8 -1.4853 0.0543
8 -4 9 1.2031 0.0325
8 -4 10 2.7372 0.0125
8 -4 11 1.0257 0.0063
8 -4 12 -2.0188 -0.0276
8 -4 13 -2.1370 -0.0388
8 -4 14 -0.7141 0.0006
8 -4 15 -0.2402 -0.0047
8 -4 16 -0.1933 -0.0406
8 -4 17 -0.9037 -0.0272
8 -4 18 -1.1745 0.0188
8 -4 19 -0.0915 0.0631
8 -3 0 2.5820 -0.4953
8 -3 1 -2.5396 -0.1926
8 -3 2 -5.0855 0.1564
8 -3 3 -1.2612 0.1042
8 -3 4 3.7598 0.0176
8 -3 5 2.2593 0.0791
8 -3 6 -2.0962 0.0803
8 -3 7 -2.3515 0.0192
8 -3 8 0.1072 -0.0086
8 -3 9 2.2836 -0.0231
8 -3 10 2.5729 -0.0305
8 -3 11 -0.2687 -0.0404
8 -3 12 -2.2656 -0.0394
8 -3 13 -0.7093 0.0065
8 -3 14 0.5292 0.0205
8 -3 15 0.8625 -0.0147
8 -3 16 1.7356 0.0026
8 -3 17 1.1337 0.0354
8 -3 18 -0.1114 -0.0004
8 -3 19 -0.4488 -0.0468
8 -2 0 -1.6988 -0.1855
8 -2 1 -4.6357 0.2872
8 -2 2 -3.5632 0.2420
8 -2 3 3.3276 0.0110
8 -2 4 7.7706 0.0206
8 -2 5 3.9983 0.0503
8 -2 6 -1.4616 -0.0278
8 -2 7 -3.1713 -0.0523
8 -2 8 -1.8317 -0.0273
8 -2 9 1.2592 -0.0256
8 -2 10 1.6222 -0.0334
8 -2 11 -2.0675 -0.0328
8 -2 12 -2.4888 0.0049
8 -2 13 1.3001 0.0410
8 -2 14 2.6593 0.0133
8 -2 15 1.2560 -0.0024
8 -2 16 -1.0572 0.0217
8 -2 17 -3.0728 0.0012
8 -2 18 -1.2417 -0.0262
8 -2 19 2.1201 0.0069
8 -2 20 2.3495 0.0356
8 -1 0 -2.1298 0.3751
8 -1 1 -4.6473 0.3546
8 -1 2 -0.2233 -0.0120
8 -1 3 7.0820 -0.0842
8 -1 5 -2.9407 -0.0585
8 -1 6 -6.7286 -0.1029
8 -1 7 -3.0483 -0.0427
8 -1 8 2.5580 -0.0090
8 -1 9 4.3577 -0.0073
8 -1 10 -0.3823 0.0038
8 -1 11 -4.7209 0.0296
8 -1 12 -1.7431 0.0616
8 -1 13 1.4384 0.0411
8 -1 14 -0.5347 -0.0031
8 -1 15 -1.8701 0.0068
8 -1 16 -1.0950 0.0049
8 -1 17 -0.4655 -0.0399
8 -1 18 0.2444 -0.0446
8 -1 19 -0.5991 -0.0208
8 -1 20 -1.6638 -0.0192
8 0 0 -4.3033 0.3959
8 0 1 -3.5705 -0.0904
8 0 2 0.4326 -0.2571
8 0 3 2.3434 -0.0650
8 0 4 -1.0850 -0.0151
8 0 5 -4.2761 -0.0779
8 0 6 -2.6277 -0.0316
8 0 7 1.0219 0.0273
8 0 8 3.3717 0.0327
8 0 9 2.1393 0.0362
8 0 10 -2.2382 0.0303
8 0 11 -2.9684 0.0253
8 0 12 1.1131 0.0164
8 0 13 2.3672 -0.0173
8 0 14 1.0121 -0.0199
8 0 15 1.6501 -0.0074
8 0 16 1.9699 -0.0395
8 0 17 1.6012 -0.0460
8 0 18 2.0087 -0.0061
8 0 19 0.8429 0.0020
8 0 20 -0.8731 -0.0032
8 1 0 3.8382 -0.1508
8 1 1 2.1223 -0.4003
8 1 2 4.9849 -0.1262
8 1 3 7.2059 0.0552
8 1 4 2.9699 -0.0155
8 1 5 -2.5367 -0.0084
8 1 6 -3.1822 0.0731
8 1 7 -0.3368 0.0736
8 1 8 1.4048 0.0400
8 1 9 -1.4532 0.0144
8 1 10 -5.4343 -0.0034
8 1 11 -3.1470 -0.0058
8 1 12 2.0674 -0.0318
8 1 13 2.2388 -0.0536
8 1 14 0.2023 -0.0238
8 1 15 -0.2648 -0.0055
8 1 16 -1.0381 -0.0037
8 1 17 -0.9653 0.0231
8 1 18 0.1839 0.0204
8 1 19 0.2908 0.0029
8 1 20 1.0076 0.0326
8 1 21 2.1309 0.0457
8 2 0 -5.5167 -0.5081
8 2 1 -3.5458 -0.1641
8 2 2 2.0102 0.1666
8 2 3 3.2208 0.0949
8 2 4 -0.1156 0.0148
8 2 5 -2.4977 0.0737
8 2 6 -1.7155 0.0605
8 2 7 1.6479 -0.0039
8 2 8 4.0437 -0.0173
8 2 9 1.4873 -0.0177
8 2 10 -1.2727 -0.0258
8 2 11 1.5446 -0.0425
8 2 12 3.8236 -0.0521
8 2 13 0.7849 -0.0076
8 2 14 -1.8370 0.0331
8 2 15 -1.8241 0.0183
8 2 16 -1.4764 0.0214
8 2 17 -0.8150 0.0339
8 2 18 -1.8014 0.0084
8 2 19 -4.2122 0.0059
8 2 20 -3.5144 0.0145
8 2 21 -0.7200 -0.0155
8 3 0 -0.8230 -0.1563
8 3 1 0.2320 0.3044
8 3 2 1.7600 0.2244
8 3 3 -1.1918 0.0079
8 3 4 -7.4005 0.0301
8 3 5 -9.7905 0.0363
8 3 6 -3.5007 -0.0544
8 3 7 4.8788 -0.0652
8 3 8 3.9127 -0.0274
8 3 9 -3.8569 -0.0223
8 3 10 -5.0006 -0.0234
8 3 11 0.7556 -0.0191
8 3 12 2.3503 0.0106
8 3 13 0.0668 0.0513
8 3 14 0.7125 0.0433
8 3 15 2.4369 0.0339
8 3 16 2.6692 0.0478
8 3 17 2.7874 0.0051
8 3 18 2.5921 -0.0436
8 3 19 3.1611 -0.0230
8 3 20 4.7201 -0.0132
8 3 21 3.4816 -0.0263
8 4 0 1.7524 0.4207
8 4 1 4.7412 0.3401
8 4 2 5.4633 -0.0584
8 4 3 2.3788 -0.0999
8 4 4 -1.7323 0.0090
8 4 5 -1.0061 -0.0503
8 4 6 3.6677 -0.0838
8 4 7 3.7966 -0.0208
8 4 8 -2.2379 -0.0031
8 4 9 -5.2753 -0.0091
8 4 10 -1.0602 0.0087
8 4 11 3.1262 0.0279
8 4 12 2.3876 0.0504
8 4 13 0.3378 0.0443
8 4 14 -0.9483 0.0144
8 4 15 -2.0096 0.0196
8 4 16 -1.3212 0.0023
8 4 17 -0.3047 -0.0576
8 4 18 -1.7718 -0.0530
8 4 19 -3.0610 -0.0214
8 4 20 -2.1639 -0.0377
8 4 21 -1.3414 -0.0179
8 5 0 -3.8064 0.3860
8 5 1 -3.6510 -0.1345
8 5 2 -2.9808 -0.2719
8 5 3 -2.7551 -0.0367
8 5 4 -1.8252 -0.0023
8 5 5 2.9295 -0.0790
8 5 6 8.1406 -0.0074
8 5 7 6.8281 0.0568
8 5 8 0.7516 0.0353
8 5 9 -1.6027 0.0327
8 5 10 1.0950 0.0394
8 5 11 1.9250 0.0296
8 5 12 -1.6912 0.0156
8 5 13 -4.7454 -0.0166
8 5 14 -3.6572 -0.0252
8 5 15 -0.2322 -0.0097
8 5 16 1.6050 -0.0413
8 5 17 0.1705 -0.0554
8 5 18 -1.0717 -0.0066
8 5 19 1.0617 0.0005
8 5 20 3.0135 -0.0040
8 5 21 1.0773 0.0472
8 6 0 2.9005 -0.1841
8 6 1 1.9211 -0.4184
8 6 2 2.0450 -0.0918
8 6 3 -1.6272 0.0972
8 6 4 -7.3479 -0.0104
8 6 5 -7.2561 -0.0053
8 6 6 -3.8102 0.0782
8 6 7 -4.1669 0.0447
8 6 8 -5.1677 0.0074
8 6 9 -1.1843 0.0292
8 6 10 3.5332 0.0262
8 6 11 3.4365 -0.0032
8 6 12 1.5664 -0.0338
8 6 13 2.0367 -0.0483
8 6 14 3.3486 -0.0172
8 6 15 3.2658 -0.0012
8 6 16 1.9574 -0.0269
8 6 17 0.6245 -0.0068
8 6 18 0.4948 0.0232
8 6 19 0.7541 0.0064
8 6 20 -0.6163 0.0306
8 6 21 -2.3977 0.0500
8 7 0 -1.9741 -0.4750
8 7 1 0.3055 -0.1251
8 7 2 3.4386 0.2030
8 7 3 1.4910 0.0925
8 7 4 2.3243 -0.0023
8 7 5 8.3021 0.0830
8 7 6 8.5241 0.0644
8 7 7 1.5566 -0.0284
8 7 8 -2.7015 -0.0298
8 7 9 -2.5531 -0.0051
8 7 10 -3.2344 -0.0217
8 7 11 -4.2364 -0.0433
8 7 12 -3.1633 -0.0483
8 7 13 -1.6346 -0.0223
8 7 14 -0.4088 0.0164
8 7 15 0.8678 0.0110
8 7 16 0.6775 0.0015
8 7 17 -0.5621 0.0307
8 7 18 -0.6623 0.0180
8 7 19 -0.4792 -0.0116
8 7 20 -1.5306 0.0189
8 7 21 -2.5250 0.0056
8 8 0 -3.5585 -0.1134
8 8 1 1.2359 0.3293
8 8 2 -0.2371 0.2300
8 8 3 -5.5113 -0.0127
8 8 4 -4.9623 0.0155
8 8 5 -1.4721 0.0406
8 8 6 -0.5664 -0.0522
8 8 7 0.8008 -0.0615
8 8 8 3.6427 -0.0081
8 8 9 4.7020 -0.0089
8 8 10 4.1996 -0.0353
8 8 11 2.9684 -0.0328
8 8 12 -0.1938 -0.0004
8 8 13 -2.6750 0.0340
8 8 14 -1.2464 0.0371
8 8 15 0.3418 0.0177
8 8 16 -0.9577 0.0245
8 8 17 -1.5104 0.0313
8 8 18 -0.1703 -0.0086
8 8 19 0.1028 -0.0135
8 8 20 -0.6018 0.0139
8 8 21 -0.3345 -0.0425
8 9 0 5.3193 0.3819
8 9 1 4.4992 0.2838
8 9 2 -0.0082 -0.0982
8 9 3 -1.6939 -0.1222
8 9 4 1.0163 0.0106
8 9 5 1.8450 -0.0363
8 9 6 -0.8630 -0.0773
8 9 7 -4.0044 -0.0227
8 9 8 -5.3759 0.0004
8 9 9 -4.0040 -0.0020
8 9 10 -1.7125 0.0140
8 9 11 -1.0013 0.0370
8 9 12 -0.1100 0.0434
8 9 13 3.1208 0.0242
8 9 14 5.0502 0.0107
8 9 15 2.4550 0.0143
8 9 16 -0.1847 0.0115
8 9 17 0.4690 -0.0176
8 9 18 0.6528 -0.0453
8 9 19 -0.9386 -0.0146
8 9 20 -1.5171 0.0033
8 10 0 -0.4630 0.3192
8 10 1 0.1182 -0.1403
8 10 2 -0.4782 -0.2502
8 10 3 -0.1553 -0.0270
8 10 4 0.4603 0.0046
8 10 5 0.2371 -0.0688
8 10 6 0.3807 -0.0075
8 10 7 1.3300 0.0401
8 10 8 2.5809 0.0208
8 10 9 2.6674 0.0260
8 10 10 0.4158 0.0387
8 10 11 -1.8247 0.0316
8 10 12 -1.7114 -0.0034
8 10 13 -0.6279 -0.0322
8 10 14 -0.6449 -0.0141
8 10 15 -1.2573 -0.0063
8 10 16 -0.7369 -0.0249
8 10 17 0.1743 -0.0287
8 10 18 0.1404 -0.0142
8 10 19 0.1831 0.0198
8 10 20 0.1973 0.0148
8 11 0 1.0014 -0.1708
8 11 1 -0.5350 -0.3456
8 11 2 -1.6067 -0.0441
8 11 3 -1.5273 0.1128
8 11 4 -0.5697 0.0015
8 11 5 0.7376 0.0109
8 11 6 1.4908 0.0805
8 11 7 1.4771 0.0313
8 11 8 1.7916 0.0044
8 11 9 1.5066 0.0281
8 11 10 0.1906 0.0171
8 11 11 -0.0559 -0.0105
8 11 12 0.8029 -0.0340
8 11 13 1.3425 -0.0192
8 11 14 1.0589 0.0053
8 11 15 0.2545 -0.0218
8 11 16 0.3641 -0.0202
8 11 17 1.1027 0.0202
8 11 18 0.6389 0.0262
8 11 19 -0.6980 0.0263
8 12 0 2.2484 -0.3873
8 12 1 3.3900 -0.0552
8 12 2 2.9684 0.2052
8 12 3 1.4261 0.0673
8 12 4 0.3509 -0.0203
8 12 5 -0.0434 0.0780
8 12 6 -1.0106 0.0528
8 12 7 -1.6913 -0.0332
8 12 8 -1.3664 -0.0136
8 12 9 -2.0446 -0.0065
8 12 10 -2.4846 -0.0316
8 12 11 -0.7968 -0.0333
8 12 12 0.3972 -0.0335
8 12 13 0.0717 -0.0092
8 12 14 -0.4221 0.0019
8 12 15 -0.7711 -0.0102
8 12 16 -0.5420 0.0228
8 12 17 -0.2707 0.0223
8 12 18 -0.5809 -0.0176
8 12 19 -0.7209 -0.0021
8 13 0 -1.1379 -0.0662
8 13 1 -0.2055 0.2743
8 13 2 -0.4147 0.1557
8 13 3 -0.8042 -0.0491
8 13 4 -0.4066 0.0131
8 13 5 -0.1977 0.0489
8 13 6 -0.4524 -0.0625
8 13 7 0.8492 -0.0718
8 13 8 1.9832 -0.0135
8 13 9 0.6625 -0.0189
8 13 10 0.3617 -0.0064
8 13 11 1.2270 0.0118
8 13 12 0.1319 0.0046
8 13 13 -0.6246 0.0180
8 13 14 0.1091 0.0060
8 13 15 0.4021 0.0077
8 13 16 1.0775 0.0571
8 13 17 2.0285 0.0342
8 13 18 1.5237 -0.0072
8 14 0 3.2088 0.3393
8 14 1 3.4507 0.2512
8 14 2 1.0145 -0.0795
8 14 3 -0.7224 -0.1052
8 14 4 -0.5638 0.0195
8 14 5 -0.6472 -0.0252
8 14 6 -0.6359 -0.0743
8 14 7 0.8597 -0.0081
8 14 8 1.0917 0.0088
8 14 9 0.1859 -0.0114
8 14 10 0.7600 0.0126
8 14 11 -0.3890 0.0084
8 14 12 -2.6654 -0.0015
8 14 13 -0.6614 0.0085
8 14 14 2.3888 -0.0117
8 14 15 2.0845 -0.0028
8 14 16 0.6099 -0.0014
8 14 17 -1.1829 -0.0643
8 15 0 3.2667 0.2556
8 15 1 1.8001 -0.1142
8 15 2 0.2357 -0.2021
8 15 3 0.3281 -0.0133
8 15 4 -0.4026 0.0156
8 15 5 -1.5384 -0.0670
8 15 6 0.0408 -0.0210
8 15 7 2.0843 0.0438
8 15 8 -0.2511 0.0157
8 15 9 -3.4190 0.0130
8 15 10 -3.5072 0.0428
8 15 11 -3.0589 0.0271
8 15 12 -0.8988 0.0076
8 15 13 2.5415 -0.0143
8 15 14 1.2035 -0.0338
8 15 15 -2.2307 0.0035
8 15 16 -1.5049 0.0182
8 16 0 -0.3950 -0.1219
8 16 1 -3.2700 -0.2568
8 16 2 -2.2400 -0.0437
8 16 3 -0.9775 0.0669
8 16 4 -0.9210 -0.0085
8 16 5 -0.3344 0.0039
8 16 6 0.4068 0.0689
8 16 7 -0.8869 0.0306
8 16 8 -2.3653 -0.0212
8 16 9 0.1426 0.0066
8 16 10 2.5678 0.0228
8 16 11 0.7154 -0.0082
8 16 12 -0.0333 -0.0192
8 16 13 0.9228 -0.0139
8 16 14 -0.3502 0.0013
8 16 15 -0.4371 0.0185
8 17 0 -0.2276 -0.2828
8 17 1 1.9607 -0.0749
8 17 2 3.1281 0.1200
8 17 3 1.1792 0.0350
8 17 4 -0.7161 -0.0257
8 17 5 -1.3479 0.0423
8 17 6 -1.2293 0.0467
8 17 7 -1.0271 -0.0109
8 17 8 -0.7245 -0.0208
8 17 9 0.1319 0.0017
8 17 10 -0.0034 -0.0048
8 17 11 0.3209 -0.0306
8 17 12 2.7846 -0.0431
8 17 13 2.4464 -0.0450
8 18 3 -0.7188 -0.0235
8 18 4 -2.5088 0.0236
8 18 5 -3.5176 0.0705
8 18 6 -1.8946 -0.0025
8 18 7 0.6324 -0.0421
8 18 8 2.3084 -0.0218
8 18 9 3.0567 -0.0063
8 18 10 0.7027 -0.0180
9 -15 0 -0.9522 0.0650
9 -15 1 -0.4246 0.2726
9 -15 2 0.8988 0.1172
9 -15 3 0.3430 0.0015
9 -14 0 1.0657 0.3631
9 -14 1 3.2081 0.1607
9 -14 2 3.9259 -0.0375
9 -14 3 1.3787 -0.0496
9 -14 4 -0.5449 -0.0773
9 -14 5 0.6527 -0.0573
9 -14 6 2.1636 0.0005
9 -14 7 1.0830 0.0166
9 -13 0 -0.0758 0.1496
9 -13 1 -0.0494 -0.1565
9 -13 2 -0.8298 -0.1209
9 -13 3 -2.4940 -0.0182
9 -13 4 -1.8848 -0.0043
9 -13 5 0.2200 0.0211
9 -13 6 0.3692 0.0146
9 -13 7 -0.9858 0.0341
9 -13 8 -0.5458 0.0910
9 -13 9 2.7947 0.0300
9 -12 0 0.6565 -0.2398
9 -12 1 2.6829 -0.2617
9 -12 2 1.8443 -0.0085
9 -12 3 -0.2950 0.0612
9 -12 4 0.0743 0.0343
9 -12 5 1.2063 0.0298
9 -12 6 0.3180 0.0282
9 -12 7 -1.5158 0.0624
9 -12 8 -2.0322 0.0317
9 -12 9 -0.9806 -0.0663
9 -12 10 -0.5820 -0.0558
9 -12 11 -1.7068 -0.0072
9 -11 0 2.6766 -0.3452
9 -11 1 2.3793 0.0521
9 -11 2 -0.6216 0.2041
9 -11 3 -2.0732 0.0836
9 -11 4 -0.5602 0.0265
9 -11 5 0.8830 0.0059
9 -11 6 0.0079 -0.0147
9 -11 7 -1.4218 -0.0005
9 -11 8 -0.6535 -0.0153
9 -11 9 1.2038 -0.0255
9 -11 10 0.6199 -0.0151
9 -11 11 -1.6865 -0.0532
9 -11 12 -1.7021 -0.0481
9 -10 0 1.2078 0.0518
9 -10 1 -1.2358 0.3091
9 -10 2 -3.3606 0.1269
9 -10 3 -2.4694 -0.0133
9 -10 4 0.8237 -0.0197
9 -10 5 1.5975 -0.0555
9 -10 6 -1.2235 -0.0563
9 -10 7 -2.4677 -0.0329
9 -10 8 -0.3926 -0.0500
9 -10 9 0.9310 -0.0503
9 -10 10 0.4678 -0.0403
9 -10 11 1.0762 -0.0349
9 -10 12 2.3393 0.0151
9 -10 13 1.6129 0.0629
9 -10 14 -0.7987 0.0719
9 -9 0 0.4520 0.4307
9 -9 1 -1.5416 0.1678
9 -9 2 -2.1123 -0.1230
9 -9 3 -0.1789 -0.0925
9 -9 4 1.3360 -0.0408
9 -9 5 -0.2307 -0.0513
9 -9 6 -1.6855 -0.0277
9 -9 7 -0.3709 -0.0128
9 -9 8 0.6541 0.0057
9 -9 9 0.2000 0.0315
9 -9 10 0.6159 0.0084
9 -9 11 0.8036 -0.0091
9 -9 12 -0.9015 0.0233
9 -9 13 -1.6468 0.0419
9 -9 14 0.1360 0.0272
9 -9 15 1.9877 0.0021
9 -8 0 -1.1811 0.1780
9 -8 1 -1.6912 -0.2528
9 -8 2 -1.1155 -0.2104
9 -8 3 0.6432 -0.0222
9 -8 4 1.7258 -0.0237
9 -8 5 0.3747 -0.0358
9 -8 6 -1.1525 0.0042
9 -8 7 -0.9486 0.0337
9 -8 8 -0.1470 0.0594
9 -8 9 0.4921 0.0433
9 -8 10 -0.0201 0.0058
9 -8 11 -2.4042 0.0087
9 -8 12 -3.6134 0.0155
9 -8 13 -1.5039 0.0051
9 -8 14 0.6845 0.0060
9 -8 15 0.2471 0.0038
9 -8 16 -1.3896 -0.0249
9 -7 0 -2.9278 -0.3222
9 -7 1 -3.2349 -0.3153
9 -7 2 -1.4400 0.0205
9 -7 3 0.8172 0.0870
9 -7 4 -0.2708 0.0118
9 -7 5 -3.3818 0.0390
9 -7 6 -2.2343 0.0533
9 -7 7 1.9254 0.0326
9 -7 8 3.0106 0.0184
9 -7 9 1.5139 -0.0135
9 -7 10 0.6624 -0.0316
9 -7 11 0.8057 -0.0329
9 -7 12 2.0688 -0.0297
9 -7 13 3.6799 0.0001
9 -7 14 3.2035 0.0230
9 -7 15 0.7197 0.0117
9 -7 16 -0.3807 -0.0060
9 -7 17 1.3304 -0.0048
9 -6 0 -0.2081 -0.3940
9 -6 1 3.1881 0.0572
9 -6 2 4.2394 0.2360
9 -6 3 3.1478 0.0743
9 -6 4 0.0876 0.0303
9 -6 5 -0.4358 0.0579
9 -6 6 2.6646 0.0037
9 -6 7 2.3408 -0.0211
9 -6 8 -1.8422 -0.0145
9 -6 9 -3.1461 -0.0268
9 -6 10 -1.8588 -0.0331
9 -6 11 -1.2210 -0.0327
9 -6 12 0.1645 -0.0094
9 -6 13 1.8496 0.0213
9 -6 14 0.9482 0.0179
9 -6 15 -1.0206 0.0146
9 -6 16 -0.5660 0.0175
9 -6 17 0.6063 0.0061
9 -5 0 2.2093 0.0990
9 -5 1 0.6542 0.3603
9 -5 2 -1.3058 0.1151
9 -5 3 -3.2781 -0.0514
9 -5 4 -5.2199 0.0121
9 -5 5 -2.2089 -0.0085
9 -5 6 2.4738 -0.0690
9 -5 7 1.7705 -0.0448
9 -5 8 -0.4406 -0.0231
9 -5 9 0.3888 -0.0216
9 -5 10 1.1641 -0.0198
9 -5 11 1.0115 -0.0155
9 -5 12 1.0101 0.0174
9 -5 13 -0.5474 0.0417
9 -5 14 -2.8241 0.0435
9 -5 15 -2.5271 0.0467
9 -5 16 -0.2505 0.0188
9 -5 17 0.0147 -0.0104
9 -5 18 -2.0137 0.0035
9 -4 0 1.0053 0.4861
9 -4 1 0.2563 0.1802
9 -4 2 0.6031 -0.1549
9 -4 3 -1.1514 -0.1003
9 -4 4 -1.4316 -0.0157
9 -4 5 2.8570 -0.0676
9 -4 6 3.9544 -0.0641
9 -4 7 -0.0415 -0.0131
9 -4 8 -1.4223 0.0093
9 -4 9 0.1605 0.0192
9 -4 10 0.5516 0.0130
9 -4 11 0.6563 0.0250
9 -4 12 1.0187 0.0478
9 -4 13 0.7685 0.0213
9 -4 14 0.7587 -0.0003
9 -4 15 1.1930 0.0142
9 -4 16 1.5026 0.0093
9 -4 17 1.1288 -0.0050
9 -4 18 0.7883 -0.0263
9 -4 19 2.0327 -0.0576
9 -3 0 1.4198 0.1741
9 -3 1 1.9539 -0.2823
9 -3 2 1.3336 -0.2405
9 -3 3 -1.6723 -0.0151
9 -3 4 -0.5576 -0.0084
9 -3 5 3.4741 -0.0468
9 -3 6 2.4382 0.0038
9 -3 7 -1.4403 0.0449
9 -3 8 -2.3890 0.0498
9 -3 9 -1.3337 0.0297
9 -3 10 0.6077 0.0163
9 -3 11 2.5026 0.0366
9 -3 12 1.7612 0.0170
9 -3 13 -0.2957 -0.0249
9 -3 14 -1.2361 0.0001
9 -3 15 -1.5367 0.0125
9 -3 16 -1.5547 -0.0397
9 -3 17 -1.7391 -0.0593
9 -3 18 -1.4589 -0.0202
9 -3 19 0.2217 0.0241
9 -2 0 1.1188 -0.3642
9 -2 1 1.6149 -0.3595
9 -2 2 -2.4955 0.0090
9 -2 3 -6.4267 0.1136
9 -2 4 -2.8217 0.0263
9 -2 5 1.9733 0.0332
9 -2 6 1.1076 0.0594
9 -2 7 -0.9381 0.0373
9 -2 8 -0.7213 0.0165
9 -2 9 0.3980 0.0034
9 -2 10 1.4464 0.0066
9 -2 11 0.3020 -0.0084
9 -2 12 -2.7071 -0.0563
9 -2 13 -3.4858 -0.0387
9 -2 14 -1.9795 0.0207
9 -2 15 0.0068 0.0100
9 -2 16 2.4015 -0.0103
9 -2 17 2.8413 0.0145
9 -2 18 0.6975 0.0111
9 -2 19 -1.4685 -0.0321
9 -1 0 0.1645 -0.3989
9 -1 1 -0.2107 0.0710
9 -1 2 -4.8391 0.2523
9 -1 3 -4.7060 0.0742
9 -1 4 1.9118 0.0165
9 -1 5 4.6120 0.0700
9 -1 6 1.4105 0.0359
9 -1 7 -1.5830 -0.0102
9 -1 8 -1.6870 -0.0182
9 -1 9 1.4999 -0.0253
9 -1 10 4.3840 -0.0283
9 -1 11 1.7052 -0.0412
9 -1 12 -2.3430 -0.0365
9 -1 13 -1.4707 0.0093
9 -1 14 0.9553 0.0185
9 -1 15 1.2772 -0.0020
9 -1 16 0.2367 0.0189
9 -1 17 -1.6728 0.0344
9 -1 18 -1.7302 0.0152
9 -1 19 0.7609 0.0056
9 -1 20 1.5302 0.0075
9 0 0 4.9264 0.1273
9 0 1 -0.6075 0.3986
9 0 2 -5.3346 0.1371
9 0 3 0.0910 -0.0572
9 0 4 6.7065 0.0036
9 0 5 5.6158 -0.0037
9 0 6 0.9849 -0.0700
9 0 7 -2.1928 -0.0491
9 0 8 -1.4147 -0.0213
9 0 9 2.5212 -0.0252
9 0 10 2.1629 -0.0174
9 0 11 -3.0662 -0.0020
9 0 12 -3.3635 0.0219
9 0 13 0.9693 0.0325
9 0 14 1.3687 0.0179
9 0 15 -0.4941 0.0276
9 0 16 -0.4908 0.0356
9 0 17 -0.4847 -0.0047
9 0 18 -0.1494 -0.0340
9 0 19 0.8418 -0.0269
9 0 20 0.9257 -0.0193
9 1 0 -2.0898 0.4982
9 1 1 -3.7872 0.1761
9 1 2 -1.2847 -0.1789
9 1 3 3.0958 -0.1138
9 1 4 3.3011 -0.0061
9 1 5 0.5883 -0.0632
9 1 6 -2.7498 -0.0728
9 1 7 -4.5416 -0.0186
9 1 8 -0.5822 -0.0036
9 1 9 4.0275 0.0083
9 1 10 0.6023 0.0320
9 1 11 -4.4598 0.0382
9 1 12 -2.6002 0.0255
9 1 13 -0.1930 0.0006
9 1 14 -1.5511 -0.0009
9 1 15 -1.1108 0.0104
9 1 16 0.5235 -0.0248
9 1 17 0.0320 -0.0573
9 1 18 0.0648 -0.0316
9 1 19 0.1020 -0.0158
9 1 20 -1.9873 -0.0376
9 2 0 0.8698 0.1767
9 2 1 -3.9660 -0.3025
9 2 2 -3.2889 -0.2589
9 2 3 0.7868 -0.0154
9 2 4 2.4817 -0.0025
9 2 5 0.9991 -0.0367
9 2 6 -1.9056 0.0293
9 2 7 -1.5218 0.0591
9 2 8 3.0582 0.0287
9 2 9 3.3655 0.0160
9 2 10 -2.2628 0.0301
9 2 11 -3.8146 0.0359
9 2 12 -0.0030 -0.0003
9 2 13 1.4361 -0.0373
9 2 14 1.3474 -0.0212
9 2 15 2.9671 -0.0106
9 2 16 2.5893 -0.0273
9 2 17 0.7681 -0.0060
9 2 18 1.5135 0.0228
9 2 19 2.0242 0.0094
9 2 20 0.5232 0.0081
9 2 21 0.2619 0.0419
9 3 0 1.2232 -0.3812
9 3 1 2.4088 -0.3507
9 3 2 5.6132 0.0219
9 3 3 5.8770 0.1078
9 3 4 4.3000 0.0175
9 3 5 1.4729 0.0445
9 3 6 -3.8931 0.0798
9 3 7 -4.8884 0.0344
9 3 8 0.7465 -0.0021
9 3 9 2.4481 0.0026
9 3 10 -1.7409 0.0099
9 3 11 -2.1785 -0.0271
9 3 12 1.4863 -0.0813
9 3 13 2.4333 -0.0577
9 3 14 0.7351 0.0010
9 3 15 -1.3787 -0.0028
9 3 16 -3.4307 -0.0021
9 3 17 -2.7260 0.0457
9 3 18 -0.3252 0.0602
9 3 19 -1.0047 0.0369
9 3 20 -2.4472 0.0168
9 3 21 -0.3316 -0.0012
9 4 0 -3.8959 -0.3860
9 4 1 -3.7004 0.0870
9 4 2 -0.6270 0.2495
9 4 3 2.8141 0.0710
9 4 4 4.0816 0.0186
9 4 5 -1.4374 0.0583
9 4 6 -6.7678 0.0076
9 4 7 -0.9078 -0.0445
9 4 8 6.1059 -0.0410
9 4 9 1.4343 -0.0228
9 4 10 -4.3416 -0.0147
9 4 11 -1.2167 -0.0373
9 4 12 1.4464 -0.0375
9 4 13 -1.7382 0.0146
9 4 14 -3.3310 0.0258
9 4 15 -1.1844 0.0092
9 4 16 0.6892 0.0466
9 4 17 1.8983 0.0631
9 4 18 2.0944 0.0177
9 4 19 0.5488 -0.0148
9 4 20 0.1290 -0.0305
9 4 21 1.2331 -0.0396
9 5 0 1.3503 0.1423
9 5 1 2.9325 0.3900
9 5 2 2.4542 0.1134
9 5 3 -0.4003 -0.0720
9 5 4 -6.2730 -0.0029
9 5 5 -12.0993 -0.0041
9 5 6 -7.6965 -0.0653
9 5 7 4.2411 -0.0540
9 5 8 7.3268 -0.0267
9 5 9 1.3350 -0.0097
9 5 10 -0.4906 0.0015
9 5 11 1.8630 -0.0010
9 5 12 1.9796 0.0277
9 5 13 2.0843 0.0550
9 5 14 3.1703 0.0289
9 5 15 1.6074 0.0284
9 5 16 -0.3843 0.0472
9 5 17 0.8250 0.0051
9 5 18 1.6837 -0.0294
9 5 19 -0.2788 -0.0311
9 5 20 -1.3478 -0.0602
9 5 21 -0.1375 -0.0597
9 6 0 -0.6436 0.4879
9 6 1 0.8896 0.1598
9 6 2 2.2191 -0.1914
9 6 3 4.0953 -0.1185
9 6 4 4.1225 -0.0099
9 6 5 3.5192 -0.0549
9 6 6 5.8308 -0.0442
9 6 7 5.7892 0.0097
9 6 8 -1.3874 0.0074
9 6 9 -7.5920 0.0027
9 6 10 -6.0713 0.0140
9 6 11 -1.9105 0.0246
9 6 12 -0.5212 0.0351
9 6 13 -1.7293 0.0076
9 6 14 -3.5172 -0.0202
9 6 15 -3.0121 0.0061
9 6 16 0.3457 0.0039
9 6 17 2.3526 -0.0295
9 6 18 0.5367 -0.0155
9 6 19 -1.2200 -0.0265
9 6 20 0.4184 -0.0618
9 6 21 2.1679 -0.0037
9 7 0 -1.2705 0.1548
9 7 1 -1.2728 -0.2928
9 7 2 -1.3815 -0.2330
9 7 3 -1.5581 0.0076
9 7 4 -4.8583 0.0006
9 7 5 -6.1432 -0.0360
9 7 6 -0.5045 0.0352
9 7 7 4.5978 0.0511
9 7 8 3.4385 0.0158
9 7 9 2.2056 0.0208
9 7 10 4.3227 0.0340
9 7 11 4.6029 0.0250
9 7 12 1.0328 0.0007
9 7 13 -2.2603 -0.0280
9 7 14 -2.2236 -0.0200
9 7 15 -0.1372 -0.0022
9 7 16 0.9643 -0.0291
9 7 17 0.1766 -0.0285
9 7 18 -0.8551 0.0071
9 7 19 -0.5113 -0.0134
9 7 20 0.7096 -0.0116
9 7 21 0.5117 0.0537
9 8 0 2.4460 -0.3557
9 8 1 0.6542 -0.3279
9 8 2 2.9764 0.0235
9 8 3 3.5277 0.0890
9 8 4 -0.1433 -0.0009
9 8 5 -1.0045 0.0537
9 8 6 -0.0952 0.0883
9 8 7 -3.9689 0.0134
9 8 8 -7.9709 -0.0215
9 8 9 -5.2906 0.0042
9 8 10 -0.8873 0.0097
9 8 11 -0.0262 -0.0115
9 8 12 0.4802 -0.0304
9 8 13 2.3094 -0.0308
9 8 14 2.8695 -0.0119
9 8 15 1.9091 -0.0082
9 8 16 1.1019 -0.0136
9 8 17 0.7638 0.0226
9 8 18 0.5327 0.0390
9 8 19 0.7594 -0.0067
9 8 20 1.1808 -0.0026
9 9 0 -4.1164 -0.3393
9 9 1 -0.2233 0.0969
9 9 2 3.0666 0.2284
9 9 3 -0.5152 0.0345
9 9 4 -3.4242 0.0057
9 9 5 -0.0457 0.0741
9 9 6 3.4860 0.0155
9 9 7 4.1015 -0.0440
9 9 8 4.5698 -0.0315
9 9 9 3.9011 -0.0262
9 9 10 0.8625 -0.0361
9 9 11 -1.3490 -0.0279
9 9 12 -2.3563 -0.0057
9 9 13 -4.3938 0.0055
9 9 14 -4.7519 0.0054
9 9 15 -1.4607 0.0067
9 9 16 1.1763 0.0225
9 9 17 0.8010 0.0489
9 9 18 -0.0441 0.0270
9 9 19 0.0774 -0.0223
9 9 20 -0.2513 -0.0035
9 10 0 -0.2025 0.1503
9 10 1 1.4971 0.3507
9 10 2 0.0703 0.0767
9 10 3 -1.6403 -0.0724
9 10 4 0.3999 0.0268
9 10 5 1.7649 0.0072
9 10 6 -0.1381 -0.0813
9 10 7 -1.7439 -0.0627
9 10 8 -1.8793 -0.0232
9 10 9 -1.2243 -0.0108
9 10 10 0.5864 0.0041
9 10 11 1.9311 0.0235
9 10 12 0.8853 0.0373
9 10 13 -0.0795 0.0250
9 10 14 1.4142 0.0115
9 10 15 2.1672 0.0161
9 10 16 0.4072 0.0187
9 10 17 -0.4579 0.0173
9 10 18 0.4298 -0.0116
9 10 19 1.1300 -0.0430
9 10 20 1.2884 -0.0172
9 11 0 0.8878 0.4060
9 11 1 1.9072 0.0979
9 11 2 0.8845 -0.1994
9 11 3 0.1155 -0.0978
9 11 4 -0.6488 0.0038
9 11 5 -2.0040 -0.0593
9 11 6 -1.8557 -0.0365
9 11 7 -1.3386 0.0331
9 11 8 -1.9329 0.0252
9 11 9 -1.2817 0.0138
9 11 10 0.3860 0.0302
9 11 11 0.4741 0.0504
9 11 12 -0.4100 0.0363
9 11 13 -0.3146 -0.0117
9 11 14 0.3450 -0.0078
9 11 15 -0.0831 0.0183
9 11 16 -1.0298 -0.0020
9 11 17 -1.0159 -0.0223
9 11 18 -0.3476 -0.0405
9 11 19 0.4306 -0.0403
9 12 0 -1.2400 0.0892
9 12 1 -0.7301 -0.2863
9 12 2 0.6913 -0.2017
9 12 3 2.3256 0.0334
9 12 4 1.6691 0.0120
9 12 5 0.3496 -0.0314
9 12 6 0.5101 0.0473
9 12 7 0.8749 0.0547
9 12 8 2.0010 0.0117
9 12 9 3.5793 0.0146
9 12 10 2.3040 0.0198
9 12 11 -0.6991 0.0126
9 12 12 -1.9768 -0.0163
9 12 13 -1.3721 -0.0301
9 12 14 -0.0455 -0.0012
9 12 15 0.8697 -0.0262
9 12 16 1.3249 -0.0566
9 12 17 1.9953 0.0026
9 12 18 2.3467 0.0332
9 12 19 1.8699 0.0212
9 13 0 1.2105 -0.3141
9 13 1 1.6563 -0.2483
9 13 2 1.5892 0.0699
9 13 3 -0.7209 0.1103
9 13 4 -2.9502 -0.0005
9 13 5 -1.0227 0.0481
9 13 6 2.0732 0.0887
9 13 7 1.7606 0.0102
9 13 8 0.4458 -0.0209
9 13 9 -0.2898 -0.0082
9 13 10 -1.1660 -0.0111
9 13 11 -0.6694 -0.0043
9 13 12 0.3634 -0.0160
9 13 13 0.3963 -0.0159
9 13 14 0.3293 -0.0023
9 13 15 -0.2496 -0.0328
9 13 16 -1.3232 -0.0186
9 13 17 -1.3581 0.0243
9 13 18 -0.2197 -0.0134
9 14 0 0.0587 -0.2380
9 14 1 0.5117 0.1277
9 14 2 1.5815 0.2219
9 14 3 1.5841 0.0497
9 14 4 1.6456 0.0068
9 14 5 2.3019 0.0516
9 14 6 0.3190 -0.0139
9 14 7 -2.3670 -0.0548
9 14 8 -1.6603 -0.0084
9 14 9 -0.8817 -0.0109
9 14 10 -1.2602 -0.0243
9 14 11 -0.0669 -0.0032
9 14 12 0.4473 -0.0038
9 14 13 -0.7993 0.0086
9 14 14 -1.3844 0.0075
9 14 15 -1.0347 -0.0229
9 14 16 0.4449 0.0239
9 14 17 2.5724 0.0707
9 15 0 -0.2116 0.1552
9 15 1 1.9100 0.2801
9 15 2 2.2953 0.0350
9 15 3 0.0659 -0.0964
9 15 4 -0.2911 -0.0158
9 15 5 0.7077 -0.0051
9 15 6 -0.6276 -0.0516
9 15 7 -1.0933 -0.0142
9 15 8 0.8788 0.0038
9 15 9 1.6639 -0.0320
9 15 10 2.2685 -0.0038
9 15 11 2.2632 0.0276
9 15 12 -1.0474 0.0045
9 15 13 -2.6434 0.0032
9 15 14 0.2529 -0.0043
9 15 15 2.2269 -0.0126
9 15 16 0.9826 0.0195
9 16 0 0.6470 0.3149
9 16 1 2.4463 0.0214
9 16 2 0.6308 -0.1865
9 16 3 -1.1221 -0.0655
9 16 4 -0.2551 0.0143
9 16 5 -0.4798 -0.0503
9 16 6 -1.7650 -0.0338
9 16 7 0.1006 0.0389
9 16 8 1.5401 0.0163
9 16 9 -0.5766 -0.0212
9 16 10 -1.4757 0.0041
9 16 11 -1.1646 0.0040
9 16 12 -1.4844 -0.0109
9 16 13 0.1758 -0.0004
9 16 14 1.5060 -0.0252
9 17 1 1.6340 -0.2228
9 17 2 -0.4181 -0.1057
9 17 3 0.5645 0.0595
9 17 4 1.5467 0.0044
9 17 5 0.1238 -0.0357
9 17 6 -0.6255 0.0270
9 17 7 0.5620 0.0368
9 17 8 -0.0429 -0.0049
9 17 9 -0.8647 0.0070
9 17 10 0.1718 0.0342
9 17 11 -1.4636 0.0127
9 17 12 -3.8078 0.0075
9 18 6 0.7100 0.0532
9 18 7 0.0256 0.0498
9 18 8 -2.5527 0.0125
10 -14 0 -1.3935 -0.1947
10 -14 1 -2.1854 0.1540
10 -14 2 -2.0475 0.1482
10 -14 3 -0.7966 0.0564
10 -14 4 -0.5524 -0.0021
10 -13 0 0.5131 0.2476
10 -13 1 1.5370 0.2434
10 -13 2 2.7325 0.0358
10 -13 3 3.3860 -0.0027
10 -13 4 1.1028 -0.0271
10 -13 5 -1.4534 -0.0527
10 -13 6 -0.4410 -0.0217
10 -13 7 1.5330 -0.0017
10 -12 0 0.7535 0.2832
10 -12 1 -1.0574 -0.0075
10 -12 2 -1.0684 -0.1014
10 -12 3 -0.2950 -0.0341
10 -12 4 -1.3030 -0.0361
10 -12 5 -0.6984 -0.0206
10 -12 6 2.4475 -0.0080
10 -12 7 2.9239 -0.0005
10 -12 8 -0.2703 0.0812
10 -12 9 -1.3757 0.0952
10 -12 10 1.0516 -0.0090
10 -11 0 0.5079 -0.0424
10 -11 1 0.5766 -0.2824
10 -11 2 2.5059 -0.1104
10 -11 3 2.4350 0.0293
10 -11 4 0.1654 0.0409
10 -11 5 0.2274 0.0574
10 -11 6 1.7554 0.0437
10 -11 7 0.5287 0.0423
10 -11 8 -2.1453 0.0509
10 -11 9 -2.0376 -0.0100
10 -11 10 0.2850 -0.0484
10 -11 11 1.1876 -0.0397
10 -10 0 0.3702 -0.3695
10 -10 1 0.8171 -0.1372
10 -10 2 1.4343 0.1276
10 -10 3 -0.1917 0.1000
10 -10 4 -2.2700 0.0501
10 -10 5 -0.4799 0.0429
10 -10 6 2.1657 0.0023
10 -10 7 1.0236 0.0001
10 -10 8 -0.9195 0.0215
10 -10 9 0.2321 0.0167
10 -10 10 1.3014 -0.0037
10 -10 11 -1.0850 -0.0602
10 -10 12 -3.2702 -0.0932
10 -10 13 -1.7085 -0.0307
10 -9 0 1.8485 -0.1995
10 -9 1 1.7245 0.2089
10 -9 2 1.4564 0.1985
10 -9 3 -0.6427 0.0476
10 -9 4 -0.9004 0.0257
10 -9 5 1.5790 -0.0065
10 -9 6 0.5276 -0.0501
10 -9 7 -3.4214 -0.0442
10 -9 8 -3.6107 -0.0377
10 -9 9 -1.4403 -0.0307
10 -9 10 -1.7821 -0.0273
10 -9 11 -1.9691 -0.0458
10 -9 12 1.0566 -0.0376
10 -9 13 2.4101 0.0040
10 -9 14 -1.1237 0.0397
10 -8 0 -0.0459 0.3052
10 -8 1 -0.8563 0.3093
10 -8 2 -0.9389 0.0046
10 -8 3 -2.1156 -0.0688
10 -8 4 -1.4803 -0.0267
10 -8 5 -0.2227 -0.0492
10 -8 6 -0.8807 -0.0576
10 -8 7 -0.1386 -0.0468
10 -8 8 1.9992 -0.0199
10 -8 9 1.4367 0.0162
10 -8 10 0.3289 0.0004
10 -8 11 2.0183 -0.0253
10 -8 12 2.8315 -0.0034
10 -8 13 0.2897 0.0191
10 -8 14 -0.5285 0.0166
10 -8 15 3.1029 0.0156
10 -7 0 -0.0440 0.3692
10 -7 1 1.3330 -0.0541
10 -7 2 0.3689 -0.2141
10 -7 3 -1.1367 -0.0669
10 -7 4 0.5808 -0.0173
10 -7 5 1.2973 -0.0385
10 -7 6 -0.8722 -0.0218
10 -7 7 -1.7180 0.0076
10 -7 8 -1.2447 0.0550
10 -7 9 -1.0834 0.0586
10 -7 10 0.1383 0.0093
10 -7 11 1.1783 -0.0062
10 -7 12 -0.7167 -0.0059
10 -7 13 -3.6416 -0.0159
10 -7 14 -3.7323 -0.0017
10 -7 15 -1.7376 0.0160
10 -7 16 -1.2374 0.0070
10 -6 0 -1.3811 -0.0677
10 -6 1 -2.6720 -0.3545
10 -6 2 -3.0040 -0.1359
10 -6 3 -1.1050 0.0401
10 -6 4 0.7472 0.0018
10 -6 5 -1.0177 0.0064
10 -6 6 -1.8283 0.0400
10 -6 7 1.2355 0.0385
10 -6 8 2.6120 0.0301
10 -6 9 0.7811 0.0020
10 -6 10 -0.2821 -0.0062
10 -6 11 -0.8532 0.0003
10 -6 12 -2.7287 -0.0280
10 -6 13 -3.0102 -0.0375
10 -6 14 0.9795 -0.0128
10 -6 15 4.9010 0.0068
10 -6 16 3.6414 0.0309
10 -6 17 0.3943 0.0368
10 -5 0 -3.6547 -0.4529
10 -5 1 0.3925 -0.1740
10 -5 2 2.7020 0.1654
10 -5 3 3.4929 0.1138
10 -5 4 1.9669 0.0245
10 -5 5 -1.8053 0.0646
10 -5 6 -2.3935 0.0465
10 -5 7 -0.1384 -0.0006
10 -5 8 0.0715 -0.0056
10 -5 9 -0.4911 -0.0051
10 -5 10 0.2380 -0.0087
10 -5 11 0.3581 -0.0316
10 -5 12 0.4294 -0.0423
10 -5 13 2.8228 -0.0143
10 -5 14 5.0236 -0.0062
10 -5 15 2.4246 -0.0034
10 -5 16 -1.9600 0.0238
10 -5 17 -1.1587 0.0293
10 -4 0 2.3975 -0.2070
10 -4 1 3.6977 0.2537
10 -4 2 2.0099 0.2314
10 -4 3 1.1910 0.0203
10 -4 4 -1.6754 0.0223
10 -4 5 -3.6257 0.0378
10 -4 6 0.5641 -0.0380
10 -4 7 4.2581 -0.0575
10 -4 8 1.7475 -0.0362
10 -4 9 -1.4647 -0.0265
10 -4 10 -1.0960 -0.0199
10 -4 11 0.5900 -0.0236
10 -4 12 1.1403 -0.0116
10 -4 13 0.1795 0.0075
10 -4 14 -1.5351 0.0164
10 -4 15 -2.6249 0.0459
10 -4 16 -1.4324 0.0557
10 -4 17 0.4932 0.0191
10 -4 18 -1.2919 -0.0097
10 -3 0 0.3457 0.3712
10 -3 1 0.9816 0.3507
10 -3 2 0.9085 -0.0173
10 -3 3 -0.3589 -0.1096
10 -3 4 -3.6966 -0.0210
10 -3 5 -2.5871 -0.0374
10 -3 6 1.6855 -0.0653
10 -3 7 1.3351 -0.0393
10 -3 8 -1.5730 -0.0137
10 -3 9 -1.5073 0.0158
10 -3 10 -0.1269 0.0181
10 -3 11 -0.1609 -0.0025
10 -3 12 -0.8858 0.0077
10 -3 13 -0.6325 0.0103
10 -3 14 0.8152 -0.0029
10 -3 15 1.7163 0.0134
10 -3 16 1.7267 0.0337
10 -3 17 1.4429 0.0336
10 -3 18 0.4399 0.0109
10 -3 19 0.6178 -0.0149
10 -2 0 3.4121 0.4007
10 -2 1 0.9341 -0.0572
10 -2 2 0.8155 -0.2341
10 -2 3 -0.2895 -0.0825
10 -2 4 -1.7290 -0.0273
10 -2 5 -0.0368 -0.0523
10 -2 6 1.5032 -0.0143
10 -2 7 0.5992 0.0218
10 -2 8 -0.5110 0.0382
10 -2 9 -0.5351 0.0384
10 -2 10 1.0096 0.0106
10 -2 11 3.0043 0.0219
10 -2 12 2.6057 0.0435
10 -2 13 0.8520 0.0021
10 -2 14 0.1545 -0.0204
10 -2 15 -0.8377 0.0129
10 -2 16 -2.2789 0.0199
10 -2 17 -2.5896 -0.0089
10 -2 18 -1.7528 -0.0227
10 -2 19 0.4676 0.0069
10 -1 0 -0.3497 -0.1235
10 -1 1 0.8230 -0.3977
10 -1 2 1.5918 -0.1477
10 -1 3 -1.4147 0.0464
10 -1 4 -2.5334 0.0156
10 -1 5 0.0820 0.0229
10 -1 6 1.8665 0.0520
10 -1 7 0.9031 0.0312
10 -1 8 -1.5544 0.0279
10 -1 9 -2.0989 0.0244
10 -1 10 0.9350 0.0098
10 -1 11 2.9086 0.0093
10 -1 12 1.0877 -0.0212
10 -1 13 -0.2417 -0.0466
10 -1 14 0.1186 -0.0117
10 -1 15 -0.3396 0.0040
10 -1 16 0.2323 -0.0222
10 -1 17 2.3902 -0.0228
10 -1 18 2.5739 0.0019
10 -1 19 0.7127 0.0209
10 0 0 -2.8123 -0.4796
10 0 1 1.6769 -0.1666
10 0 2 0.8354 0.1740
10 0 3 -3.2260 0.1086
10 0 4 -3.3241 0.0220
10 0 5 -1.7618 0.0782
10 0 6 -0.8477 0.0621
10 0 7 -0.4575 -0.0000
10 0 8 -1.4673 -0.0105
10 0 9 -0.8429 -0.0193
10 0 10 2.2167 -0.0259
10 0 11 1.7572 -0.0189
10 0 12 -2.2504 -0.0239
10 0 13 -3.2166 -0.0212
10 0 14 -1.4320 -0.0174
10 0 15 -0.7873 -0.0160
10 0 16 -0.5256 0.0222
10 0 17 -0.6960 0.0523
10 0 18 -2.0103 0.0265
10 0 19 -1.9454 -0.0082
10 0 20 -0.5832 -0.0300
10 1 0 2.5688 -0.1837
10 1 1 0.4046 0.2914
10 1 2 -6.7399 0.2467
10 1 3 -6.0754 0.0045
10 1 4 -0.1779 0.0117
10 1 5 2.8458 0.0514
10 1 6 5.1582 -0.0270
10 1 7 4.4808 -0.0511
10 1 8 -0.0833 -0.0175
10 1 9 0.6734 -0.0204
10 1 10 5.3658 -0.0276
10 1 11 3.5267 -0.0128
10 1 12 -1.2520 0.0047
10 1 13 -0.7093 0.0091
10 1 14 0.9629 0.0010
10 1 15 -0.1995 0.0174
10 1 16 -0.5723 0.0452
10 1 17 -0.0382 0.0288
10 1 18 -0.2555 0.0048
10 1 19 0.5894 0.0169
10 1 20 1.7564 0.0191
10 2 0 1.6452 0.3688
10 2 1 0.8365 0.3654
10 2 2 1.0858 -0.0135
10 2 3 4.0743 -0.1186
10 2 4 2.7249 -0.0122
10 2 5 1.7093 -0.0338
10 2 6 2.7566 -0.0882
10 2 7 -2.7063 -0.0436
10 2 8 -7.0022 0.0002
10 2 9 -0.5042 -0.0003
10 2 10 3.6483 0.0057
10 2 11 -1.7074 0.0263
10 2 12 -3.6767 0.0304
10 2 13 0.3514 0.0031
10 2 14 0.4756 -0.0112
10 2 15 -2.0016 0.0141
10 2 16 -1.0630 0.0190
10 2 17 0.3967 -0.0148
10 2 18 0.6226 -0.0268
10 2 19 1.8387 -0.0104
10 2 20 2.0047 -0.0165
10 3 0 0.5485 0.3970
10 3 1 -4.8074 -0.0637
10 3 2 -4.8586 -0.2682
10 3 3 -1.2004 -0.0986
10 3 4 0.3477 -0.0083
10 3 5 2.8822 -0.0492
10 3 6 2.5203 -0.0234
10 3 7 -2.7642 0.0339
10 3 8 -1.7241 0.0344
10 3 9 4.0274 0.0099
10 3 10 1.9748 0.0144
10 3 11 -3.1224 0.0430
10 3 12 -2.2651 0.0324
10 3 13 -0.7683 -0.0172
10 3 14 -1.6829 -0.0276
10 3 15 0.1656 -0.0085
10 3 16 2.7166 -0.0193
10 3 17 0.8034 -0.0374
10 3 18 -1.6023 -0.0289
10 3 19 -1.0713 -0.0133
10 3 20 -1.4973 -0.0211
10 4 0 -0.4729 -0.1392
10 4 1 -1.6023 -0.3906
10 4 2 1.0848 -0.1375
10 4 3 0.1368 0.0603
10 4 4 -1.4038 0.0192
10 4 5 2.6592 0.0132
10 4 6 2.4015 0.0653
10 4 7 -3.2004 0.0634
10 4 8 -1.1924 0.0315
10 4 9 4.3887 0.0079
10 4 10 2.3183 0.0072
10 4 11 -1.8736 0.0087
10 4 12 -0.6157 -0.0290
10 4 13 2.5690 -0.0521
10 4 14 3.3391 -0.0226
10 4 15 1.5804 -0.0085
10 4 16 -1.5743 -0.0163
10 4 17 -2.8532 -0.0020
10 4 18 0.0894 0.0253
10 4 19 2.9019 0.0456
10 4 20 1.4829 0.0377
10 5 0 -1.0804 -0.4456
10 5 1 -0.8322 -0.1324
10 5 2 1.8527 0.1818
10 5 3 3.9746 0.1100
10 5 4 8.7445 0.0194
10 5 5 9.2967 0.0608
10 5 6 -2.6173 0.0525
10 5 7 -10.7423 0.0082
10 5 8 -3.9548 -0.0105
10 5 9 1.0544 -0.0318
10 5 10 -2.9780 -0.0329
10 5 11 -3.3790 -0.0254
10 5 12 1.3400 -0.0380
10 5 13 1.6602 -0.0252
10 5 14 -1.8774 -0.0019
10 5 15 -2.6573 -0.0018
10 5 16 -0.9395 0.0161
10 5 17 -0.0313 0.0386
10 5 18 0.0513 0.0415
10 5 19 -0.3758 0.0462
10 5 20 -0.8988 0.0349
10 6 0 -1.9204 -0.1458
10 6 1 -0.7192 0.2838
10 6 2 -0.3488 0.2169
10 6 3 -0.7417 -0.0051
10 6 4 -0.6272 0.0071
10 6 5 -5.3554 0.0354
10 6 6 -9.2181 -0.0287
10 6 7 -0.1695 -0.0445
10 6 8 10.7230 -0.0337
10 6 9 8.0011 -0.0398
10 6 10 1.0518 -0.0216
10 6 11 0.7310 -0.0051
10 6 12 1.6354 0.0029
10 6 13 0.3431 0.0222
10 6 14 0.0715 0.0141
10 6 15 -0.0640 0.0050
10 6 16 -2.0253 0.0261
10 6 17 -2.5544 0.0170
10 6 18 0.3947 -0.0024
10 6 19 2.6151 0.0082
10 6 20 1.3940 0.0002
10 7 0 0.3321 0.3479
10 7 1 -0.1377 0.3256
10 7 2 -0.0697 -0.0213
10 7 3 1.6537 -0.0968
10 7 4 1.9348 -0.0048
10 7 5 -1.8241 -0.0369
10 7 6 -3.4082 -0.0696
10 7 7 -0.5967 -0.0228
10 7 8 -0.9395 -0.0067
10 7 9 -4.2716 -0.0146
10 7 10 -3.7287 0.0045
10 7 11 -0.5039 0.0256
10 7 12 1.5966 0.0361
10 7 13 2.3269 0.0230
10 7 14 1.0421 -0.0043
10 7 15 -1.1398 0.0092
10 7 16 -0.9067 0.0198
10 7 17 1.6273 -0.0170
10 7 18 2.9050 -0.0141
10 7 19 1.0851 0.0163
10 7 20 -1.0185 -0.0128
10 8 0 -2.2229 0.3493
10 8 1 -1.7333 -0.0641
10 8 2 -0.2175 -0.2322
10 8 3 1.9667 -0.0731
10 8 4 2.0431 -0.0183
10 8 5 0.5138 -0.0639
10 8 6 2.2833 -0.0137
10 8 7 6.3297 0.0450
10 8 8 6.0782 0.0240
10 8 9 1.3759 0.0003
10 8 10 -1.9610 0.0168
10 8 11 -1.4859 0.0329
10 8 12 -0.3816 0.0186
10 8 13 -2.2011 -0.0144
10 8 14 -4.5353 -0.0222
10 8 15 -3.0441 -0.0005
10 8 16 -0.0089 -0.0105
10 8 17 0.6566 -0.0313
10 8 18 -0.1796 -0.0017
10 8 19 -1.0324 0.0164
10 8 20 -1.1798 -0.0028
10 9 0 -1.1119 -0.1208
10 9 1 -1.0759 -0.3362
10 9 2 0.1702 -0.1005
10 9 3 2.0587 0.0657
10 9 4 0.3185 -0.0055
10 9 5 -2.8568 -0.0108
10 9 6 -2.7224 0.0557
10 9 7 -1.5876 0.0442
10 9 8 -2.8303 0.0059
10 9 9 -3.1683 0.0110
10 9 10 0.1396 0.0177
10 9 11 3.4344 -0.0157
10 9 12 3.3616 -0.0475
10 9 13 1.8922 -0.0343
10 9 14 1.8215 -0.0043
10 9 15 1.7712 0.0003
10 9 16 -0.0371 -0.0218
10 9 17 -1.0328 -0.0203
10 9 18 0.1100 0.0244
10 9 19 0.9760 0.0494
10 9 20 1.8552 0.0268
10 10 0 0.5910 -0.4007
10 10 1 -0.7002 -0.1190
10 10 2 1.7222 0.1698
10 10 3 1.6434 0.0748
10 10 4 -2.1576 -0.0173
10 10 5 -2.9209 0.0625
10 10 6 -0.2651 0.0711
10 10 7 0.7278 0.0045
10 10 8 -0.3802 -0.0209
10 10 9 -0.7239 -0.0254
10 10 10 -0.0271 -0.0354
10 10 11 0.3772 -0.0306
10 10 12 0.0409 0.0035
10 10 13 -0.9756 0.0223
10 10 14 -1.7947 0.0011
10 10 15 -1.6763 -0.0044
10 10 16 -1.2066 0.0123
10 10 17 -0.6853 0.0261
10 10 18 -0.4515 0.0455
10 10 19 -0.8112 0.0377
10 11 0 -2.6653 -0.1244
10 11 1 -0.7898 0.2609
10 11 2 1.4871 0.1796
10 11 3 0.2617 -0.0463
10 11 4 -0.2141 -0.0069
10 11 5 1.4670 0.0407
10 11 6 2.2560 -0.0409
10 11 7 2.4400 -0.0594
10 11 8 2.3353 -0.0244
10 11 9 1.0204 -0.0223
10 11 10 -0.3003 -0.0293
10 11 11 -0.7437 -0.0172
10 11 12 -1.3263 0.0148
10 11 13 -1.7309 0.0193
10 11 14 -0.5681 0.0029
10 11 15 0.7917 0.0165
10 11 16 0.8286 0.0146
10 11 17 1.1470 -0.0005
10 11 18 1.6094 0.0203
10 11 19 0.9689 0.0112
10 12 0 -1.8175 0.2921
10 12 1 -1.8095 0.2613
10 12 2 -1.9955 -0.0477
10 12 3 -2.6737 -0.0939
10 12 4 -1.9365 0.0158
10 12 5 -0.8378 -0.0379
10 12 6 0.6409 -0.0873
10 12 7 1.0780 -0.0240
10 12 8 -1.6466 0.0048
10 12 9 -3.0717 0.0020
10 12 10 -0.1907 0.0202
10 12 11 2.1284 0.0482
10 12 12 1.3282 0.0597
10 12 13 0.4644 0.0189
10 12 14 0.5579 0.0035
10 12 15 -0.4337 0.0434
10 12 16 -1.9107 0.0265
10 12 17 -1.7835 -0.0093
10 12 18 -1.1221 0.0020
10 13 0 -1.6682 0.2750
10 13 1 -0.0241 -0.0512
10 13 2 1.6286 -0.1892
10 13 3 3.0691 -0.0449
10 13 4 2.7257 -0.0025
10 13 5 0.4934 -0.0604
10 13 6 -1.0907 0.0019
10 13 7 -2.1951 0.0664
10 13 8 -1.9551 0.0417
10 13 9 1.1489 0.0250
10 13 10 2.4230 0.0152
10 13 11 -0.0925 0.0061
10 13 12 -1.0873 0.0026
10 13 13 0.4304 -0.0101
10 13 14 0.6549 0.0148
10 13 15 -0.5517 0.0113
10 13 16 -0.3474 -0.0662
10 13 17 0.9343 -0.0620
10 14 0 -3.6588 -0.1432
10 14 1 -1.0370 -0.2872
10 14 2 1.1030 -0.0858
10 14 3 0.5433 0.0507
10 14 4 -1.7475 -0.0099
10 14 5 -1.4843 -0.0015
10 14 6 1.8213 0.0720
10 14 7 3.1979 0.0392
10 14 8 2.5386 -0.0022
10 14 9 1.8834 0.0133
10 14 10 -0.0390 0.0072
10 14 11 -1.3728 0.0052
10 14 12 -0.4670 0.0006
10 14 13 -0.0005 -0.0284
10 14 14 -0.3173 -0.0268
10 14 15 -0.0720 -0.0313
10 14 16 0.0870 -0.0297
10 15 0 -1.1942 -0.3086
10 15 1 0.9966 -0.0533
10 15 2 1.1375 0.1470
10 15 3 -0.0781 0.0690
10 15 4 -0.9487 0.0066
10 15 5 0.5184 0.0620
10 15 6 1.7600 0.0346
10 15 7 0.3236 -0.0364
10 15 8 -0.3985 -0.0016
10 15 9 -0.4870 0.0176
10 15 10 -1.9890 -0.0340
10 15 11 -1.5392 -0.0311
10 15 12 0.8331 -0.0023
10 15 13 1.1467 0.0064
10 15 14 -0.2469 0.0178
10 15 15 -1.0413 -0.0112
10 16 0 3.8367 -0.0424
10 16 1 3.6527 0.2686
10 16 2 2.9845 0.1637
10 16 3 1.9201 -0.0262
10 16 4 0.9389 -0.0025
10 16 5 1.5599 0.0195
10 16 6 0.9671 -0.0642
10 16 7 -1.1039 -0.0560
10 16 8 -1.0261 0.0250
10 16 9 -0.2304 0.0036
10 16 10 0.3422 -0.0241
10 16 11 1.9500 0.0251
10 16 12 1.5504 0.0137
10 16 13 -0.8481 -0.0392
10 17 4 -2.2807 0.0264
10 17 5 -0.0603 -0.0219
10 17 6 0.3973 -0.0613
10 17 7 0.0098 0.0272
10 17 8 0.8484 0.0448
10 17 9 0.1504 -0.0445
10 17 10 -0.9022 -0.0397
10 17 11 -0.4030 0.0232
11 -13 0 -1.5245 -0.3482
11 -13 1 -1.8881 -0.0049
11 -13 2 -1.6349 0.0837
11 -13 3 -0.7318 0.0293
11 -13 4 -0.2727 0.0318
11 -12 0 -2.3537 0.0676
11 -12 1 0.4948 0.2404
11 -12 2 2.0020 0.0725
11 -12 3 2.1247 0.0219
11 -12 4 1.3046 0.0257
11 -12 5 -0.8458 -0.0366
11 -12 6 -1.6811 -0.0359
11 -12 7 1.0822 -0.0081
11 -12 8 3.7283 0.0330
11 -11 0 -0.3091 0.3365
11 -11 1 1.2861 0.1239
11 -11 2 -0.4653 -0.0917
11 -11 3 -1.1691 -0.0582
11 -11 4 -1.0150 -0.0362
11 -11 5 -1.5570 -0.0370
11 -11 6 -0.3226 -0.0125
11 -11 7 2.7143 -0.0169
11 -11 8 3.1820 0.0233
11 -11 9 0.4493 0.0839
11 -11 10 -0.6032 0.0726
11 -10 0 2.3304 0.1697
11 -10 1 1.4221 -0.2030
11 -10 2 0.0013 -0.1809
11 -10 3 0.9666 -0.0124
11 -10 4 1.4459 0.0164
11 -10 5 0.5053 0.0161
11 -10 6 0.6480 0.0296
11 -10 7 1.3613 0.0362
11 -10 8 -0.2750 0.0478
11 -10 9 -3.3286 0.0360
11 -10 10 -3.3140 0.0304
11 -10 11 -0.5193 0.0267
11 -10 12 0.8347 -0.0587
11 -9 0 0.0560 -0.2731
11 -9 1 -0.5055 -0.3050
11 -9 2 -0.3083 -0.0173
11 -9 3 1.0945 0.0851
11 -9 4 0.6816 0.0532
11 -9 5 -0.2548 0.0581
11 -9 6 1.1627 0.0560
11 -9 7 2.7513 0.0346
11 -9 8 1.5440 0.0190
11 -9 9 0.3110 0.0177
11 -9 10 1.9316 0.0156
11 -9 11 2.0327 -0.0332
11 -9 12 -1.3069 -0.0823
11 -9 13 -1.6872 -0.0541
11 -8 0 1.7259 -0.3547
11 -8 1 0.9273 0.0370
11 -8 2 0.5031 0.1970
11 -8 3 1.0620 0.0835
11 -8 4 0.7496 0.0329
11 -8 5 0.5320 0.0346
11 -8 6 0.2655 0.0136
11 -8 7 -1.4482 -0.0169
11 -8 8 -2.8704 -0.0455
11 -8 9 -1.7736 -0.0304
11 -8 10 -0.5221 -0.0042
11 -8 11 -1.7471 -0.0246
11 -8 12 -1.6370 -0.0445
11 -8 13 1.2459 -0.0277
11 -8 14 -0.2583 0.0037
11 -7 0 0.3660 0.0836
11 -7 1 -1.8052 0.3201
11 -7 2 -0.5308 0.1172
11 -7 3 0.8472 -0.0215
11 -7 4 -0.0701 -0.0108
11 -7 5 -0.7910 -0.0258
11 -7 6 -0.6672 -0.0396
11 -7 7 -0.3845 -0.0585
11 -7 8 -0.2461 -0.0600
11 -7 9 -0.8200 0.0021
11 -7 10 -1.7863 0.0297
11 -7 11 -1.3720 0.0068
11 -7 12 1.4065 0.0128
11 -7 13 3.1897 0.0162
11 -7 14 1.2100 -0.0179
11 -7 15 0.4028 -0.0424
11 -6 0 -1.3768 0.4006
11 -6 1 -0.9271 0.1514
11 -6 2 0.3134 -0.1309
11 -6 3 -0.1805 -0.0979
11 -6 4 0.1741 -0.0418
11 -6 5 0.6004 -0.0379
11 -6 6 -1.3355 -0.0205
11 -6 7 -2.9014 -0.0303
11 -6 8 -1.8124 0.0038
11 -6 9 0.3494 0.0554
11 -6 10 1.9154 0.0211
11 -6 11 2.8048 -0.0077
11 -6 12 3.1655 0.0122
11 -6 13 1.0404 0.0087
11 -6 14 -3.4934 -0.0009
11 -6 15 -4.8995 0.0005
11 -6 16 -2.0356 -0.0183
11 -5 0 0.0167 0.2157
11 -5 1 -0.3976 -0.2373
11 -5 2 -0.7284 -0.2325
11 -5 3 -0.0217 -0.0357
11 -5 4 0.6093 -0.0081
11 -5 5 -0.7124 -0.0043
11 -5 6 -0.9194 0.0224
11 -5 7 1.5251 0.0225
11 -5 8 2.3658 0.0402
11 -5 9 0.5354 0.0278
11 -5 10 -0.5746 0.0002
11 -5 11 -0.0784 0.0188
11 -5 12 -0.3877 0.0056
11 -5 13 -3.2729 -0.0431
11 -5 14 -5.0260 -0.0523
11 -5 15 -1.1335 -0.0406
11 -5 16 3.3829 -0.0159
11 -5 17 2.6413 0.0263
11 -4 0 -3.7009 -0.3161
11 -4 1 -3.5521 -0.3407
11 -4 2 -1.0337 -0.0106
11 -4 3 1.4346 0.0756
11 -4 4 2.1867 0.0038
11 -4 5 0.8292 0.0464
11 -4 6 -1.0296 0.0770
11 -4 7 -2.2696 0.0384
11 -4 8 -2.0230 0.0123
11 -4 9 -0.2134 -0.0037
11 -4 10 0.4763 -0.0022
11 -4 11 -0.8427 -0.0010
11 -4 12 -1.4571 -0.0186
11 -4 13 -0.2622 -0.0164
11 -4 14 2.1353 -0.0224
11 -4 15 3.7845 -0.0421
11 -4 16 1.7182 -0.0154
11 -4 17 -1.0473 0.0241
11 -3 0 -0.7887 -0.4121
11 -3 1 0.0648 0.0292
11 -3 2 1.3325 0.2326
11 -3 3 2.6856 0.0890
11 -3 4 1.8212 0.0356
11 -3 5 -1.3451 0.0676
11 -3 6 -2.1139 0.0076
11 -3 7 0.6539 -0.0441
11 -3 8 2.6456 -0.0360
11 -3 9 1.0703 -0.0273
11 -3 10 -1.1748 -0.0181
11 -3 11 -0.0031 -0.0095
11 -3 12 2.4052 -0.0016
11 -3 13 1.2256 -0.0001
11 -3 14 -1.6092 -0.0102
11 -3 15 -1.9498 0.0093
11 -3 16 -0.6110 0.0308
11 -3 17 0.8735 0.0146
11 -3 18 1.0948 0.0155
11 -2 0 -3.3450 0.1011
11 -2 1 0.8191 0.3658
11 -2 2 4.1422 0.1215
11 -2 3 3.8585 -0.0566
11 -2 4 -0.5055 0.0011
11 -2 5 -2.7405 0.0051
11 -2 6 -0.6228 -0.0502
11 -2 7 0.8059 -0.0531
11 -2 8 -0.4537 -0.0421
11 -2 9 -1.7998 -0.0215
11 -2 10 -1.1596 0.0072
11 -2 11 0.8548 0.0104
11 -2 12 1.4663 0.0109
11 -2 13 0.1150 0.0114
11 -2 14 0.0608 -0.0010
11 -2 15 1.6270 -0.0122
11 -2 16 1.7760 -0.0193
11 -2 17 0.7644 0.0026
11 -2 18 0.0569 0.0245
11 -2 19 -0.2557 -0.0145
11 -1 0 1.5702 0.4732
11 -1 1 1.9323 0.1769
11 -1 2 1.0622 -0.1475
11 -1 3 -1.1973 -0.1004
11 -1 4 -2.5979 -0.0331
11 -1 5 -0.8438 -0.0750
11 -1 6 0.4582 -0.0525
11 -1 7 0.5703 0.0002
11 -1 8 0.6577 0.0199
11 -1 9 -0.9763 0.0345
11 -1 10 -2.6017 0.0269
11 -1 11 -1.4777 0.0246
11 -1 12 -0.6080 0.0443
11 -1 13 -1.5995 0.0184
11 -1 14 -0.9629 -0.0262
11 -1 15 0.7948 -0.0187
11 -1 16 0.0263 0.0157
11 -1 17 -1.8768 0.0296
11 -1 18 -2.0397 -0.0001
11 -1 19 -0.6462 -0.0187
11 0 0 0.3473 0.1999
11 0 1 -0.1854 -0.2723
11 0 2 0.2693 -0.2311
11 0 3 -1.4339 -0.0155
11 0 4 -1.4623 -0.0222
11 0 5 0.1789 -0.0379
11 0 6 0.4371 0.0291
11 0 7 0.6617 0.0443
11 0 8 -0.2135 0.0377
11 0 9 -1.7320 0.0404
11 0 10 0.9386 0.0231
11 0 11 5.1082 0.0158
11 0 12 4.3494 0.0012
11 0 13 1.3544 -0.0294
11 0 14 0.7746 -0.0198
11 0 15 0.2793 -0.0087
11 0 16 -1.0045 -0.0367
11 0 17 0.2988 -0.0389
11 0 18 2.7806 0.0031
11 0 19 2.2927 0.0528
11 1 0 -2.3339 -0.3511
11 1 1 1.6070 -0.3542
11 1 2 3.5676 0.0117
11 1 3 0.3811 0.0892
11 1 4 -0.7557 -0.0055
11 1 5 -1.1203 0.0463
11 1 6 -2.3794 0.0951
11 1 7 -1.7696 0.0458
11 1 8 -1.7537 0.0097
11 1 9 -2.7128 -0.0097
11 1 10 -1.6400 -0.0246
11 1 11 -0.3440 -0.0127
11 1 12 -0.3116 -0.0073
11 1 13 0.4836 -0.0122
11 1 14 1.5655 -0.0166
11 1 15 1.0639 -0.0317
11 1 16 0.4962 -0.0147
11 1 17 0.8838 0.0305
11 1 18 -0.1894 0.0240
11 1 19 -2.3339 -0.0114
11 1 20 -1.6466 -0.0035
11 2 0 -2.1755 -0.3981
11 2 1 1.4837 0.0640
11 2 2 -4.1800 0.2523
11 2 3 -7.8921 0.0706
11 2 4 -2.9544 0.0099
11 2 5 -0.7368 0.0758
11 2 6 0.5599 0.0365
11 2 7 5.0059 -0.0281
11 2 8 4.4101 -0.0323
11 2 9 0.2061 -0.0331
11 2 10 0.6402 -0.0325
11 2 11 2.7797 -0.0180
11 2 12 1.1023 -0.0081
11 2 13 -1.9438 -0.0016
11 2 14 -2.4719 -0.0028
11 2 15 -1.2701 -0.0045
11 2 16 -0.5133 0.0123
11 2 17 -1.1020 0.0217
11 2 18 -2.7923 0.0098
11 2 19 -2.9632 0.0131
11 2 20 -0.1758 0.0235
11 3 0 1.2878 0.1191
11 3 1 2.2607 0.3751
11 3 2 -2.1725 0.1333
11 3 3 -0.0929 -0.0633
11 3 4 2.1259 -0.0131
11 3 5 0.0152 -0.0004
11 3 6 3.0276 -0.0605
11 3 7 3.8359 -0.0601
11 3 8 -3.9673 -0.0310
11 3 9 -5.5854 -0.0191
11 3 10 1.7440 -0.0031
11 3 11 4.1944 0.0180
11 3 12 0.8253 0.0320
11 3 13 0.0051 0.0264
11 3 14 1.2082 0.0072
11 3 15 0.2547 0.0007
11 3 16 -1.0419 0.0081
11 3 17 -0.4117 0.0097
11 3 18 0.8256 0.0023
11 3 19 2.4815 0.0083
11 3 20 4.1014 0.0249
11 4 0 4.3126 0.4529
11 4 1 0.7480 0.1553
11 4 2 -3.7968 -0.1723
11 4 3 -0.2736 -0.1242
11 4 4 1.1598 -0.0276
11 4 5 0.6768 -0.0597
11 4 6 2.4946 -0.0547
11 4 7 -0.7813 -0.0020
11 4 8 -4.5625 0.0183
11 4 9 -0.5522 0.0239
11 4 10 2.3160 0.0335
11 4 11 -0.7286 0.0413
11 4 12 -2.4591 0.0339
11 4 13 -1.6166 0.0071
11 4 14 -1.0309 -0.0076
11 4 15 0.5047 -0.0084
11 4 16 2.5878 -0.0138
11 4 17 1.5651 -0.0162
11 4 18 -1.6161 -0.0166
11 4 19 -2.1463 -0.0066
11 4 20 -0.7921 -0.0039
11 5 0 0.1783 0.1392
11 5 1 -3.4292 -0.2951
11 5 2 -2.7981 -0.2295
11 5 3 -0.2873 -0.0023
11 5 4 -2.5745 -0.0073
11 5 5 -0.8270 -0.0328
11 5 6 4.5740 0.0364
11 5 7 3.1333 0.0545
11 5 8 0.0633 0.0311
11 5 9 1.5759 0.0310
11 5 10 2.3480 0.0253
11 5 11 0.4349 0.0054
11 5 12 -1.4420 -0.0170
11 5 13 -1.2776 -0.0271
11 5 14 1.2618 -0.0237
11 5 15 2.3447 -0.0341
11 5 16 -0.5669 -0.0335
11 5 17 -3.3519 -0.0087
11 5 18 -1.7038 -0.0039
11 5 19 1.9943 -0.0097
11 5 20 2.3094 -0.0260
11 6 0 2.1664 -0.3585
11 6 1 -2.0839 -0.3204
11 6 2 -2.1053 0.0533
11 6 3 -1.0973 0.1124
11 6 4 0.5592 -0.0052
11 6 5 5.8471 0.0372
11 6 6 4.1199 0.0860
11 6 7 -5.9622 0.0359
11 6 8 -8.2861 0.0135
11 6 9 -1.8909 0.0145
11 6 10 0.8884 -0.0118
11 6 11 -1.0620 -0.0276
11 6 12 -1.5066 -0.0240
11 6 13 0.9785 -0.0134
11 6 14 2.6786 -0.0077
11 6 15 1.5759 -0.0113
11 6 16 0.6349 0.0036
11 6 17 1.1528 0.0146
11 6 18 0.6829 0.0047
11 6 19 -1.3530 0.0092
11 6 20 -2.8034 0.0051
11 7 0 -1.2568 -0.3533
11 7 1 -0.9801 0.0963
11 7 2 1.5687 0.2478
11 7 3 2.8421 0.0399
11 7 4 4.5067 -0.0137
11 7 5 4.0213 0.0698
11 7 6 -2.3598 0.0341
11 7 7 -4.2908 -0.0260
11 7 8 2.5320 -0.0135
11 7 9 5.0362 -0.0172
11 7 10 0.1438 -0.0419
11 7 11 -2.3654 -0.0362
11 7 12 -0.5274 -0.0121
11 7 13 1.2158 0.0128
11 7 14 1.0920 0.0146
11 7 15 -0.1741 0.0005
11 7 16 -1.7089 0.0140
11 7 17 -3.2298 0.0298
11 7 18 -3.3143 0.0186
11 7 19 -0.9711 -0.0068
11 7 20 1.7031 -0.0118
11 8 0 -0.5134 0.1409
11 8 1 -0.4022 0.3591
11 8 2 -1.9495 0.1064
11 8 3 -2.9619 -0.0706
11 8 4 -2.5059 0.0054
11 8 5 -3.4146 0.0244
11 8 6 -3.9120 -0.0470
11 8 7 -0.7513 -0.0534
11 8 8 1.4278 -0.0237
11 8 9 0.5417 -0.0236
11 8 10 1.1937 -0.0215
11 8 11 2.2114 -0.0021
11 8 12 1.2503 0.0165
11 8 13 1.5855 0.0230
11 8 14 2.6365 0.0087
11 8 15 1.2287 0.0006
11 8 16 -0.6547 0.0100
11 8 17 -0.5578 -0.0043
11 8 18 0.7108 -0.0304
11 8 19 1.5239 -0.0295
11 9 0 2.3269 0.4018
11 9 1 -0.8045 0.1253
11 9 2 -1.0398 -0.1571
11 9 3 1.9964 -0.0924
11 9 4 3.6278 0.0017
11 9 5 2.2717 -0.0380
11 9 6 0.1477 -0.0511
11 9 7 -1.3063 -0.0083
11 9 8 -1.1969 0.0129
11 9 9 0.3195 0.0051
11 9 10 -0.1480 0.0097
11 9 11 -2.6093 0.0371
11 9 12 -1.7037 0.0480
11 9 13 1.0018 0.0209
11 9 14 -0.5546 -0.0179
11 9 15 -2.9587 -0.0330
11 9 16 -1.5513 -0.0253
11 9 17 -0.1601 -0.0192
11 9 18 -0.8358 -0.0258
11 9 19 -1.0437 -0.0377
11 10 0 -3.4856 0.1314
11 10 1 -2.0608 -0.2543
11 10 2 -0.6151 -0.2088
11 10 3 0.3206 -0.0047
11 10 4 0.7047 -0.0044
11 10 5 0.6698 -0.0326
11 10 6 0.3121 0.0177
11 10 7 1.2391 0.0404
11 10 8 3.3750 0.0280
11 10 9 2.5392 0.0199
11 10 10 -1.5613 0.0215
11 10 11 -2.6371 0.0065
11 10 12 0.3939 -0.0305
11 10 13 1.2509 -0.0353
11 10 14 -0.2596 -0.0135
11 10 15 0.8438 -0.0115
11 10 16 2.3523 -0.0099
11 10 17 0.8225 -0.0025
11 10 18 -0.4182 -0.0143
11 10 19 0.0785 -0.0016
11 11 0 1.7318 -0.3013
11 11 1 0.2594 -0.2938
11 11 2 0.2769 0.0496
11 11 3 2.2476 0.1202
11 11 4 1.6089 0.0066
11 11 5 -1.9918 0.0304
11 11 6 -4.5722 0.0568
11 11 7 -3.3471 0.0042
11 11 8 -0.7592 -0.0162
11 11 9 -0.2125 -0.0058
11 11 10 0.3731 -0.0080
11 11 11 3.0040 -0.0295
11 11 12 3.7871 -0.0325
11 11 13 0.7215 -0.0019
11 11 14 -1.3142 -0.0078
11 11 15 -0.1982 -0.0264
11 11 16 -0.5610 0.0151
11 11 17 -3.0065 0.0446
11 11 18 -2.8733 0.0253
11 12 0 1.8945 -0.3091
11 12 1 1.0765 0.0695
11 12 2 1.5791 0.2243
11 12 3 1.5098 0.0266
11 12 4 -0.3584 -0.0212
11 12 5 -2.2577 0.0726
11 12 6 -2.7148 0.0240
11 12 7 -0.4289 -0.0420
11 12 8 1.8360 -0.0238
11 12 9 0.6075 -0.0183
11 12 10 -1.1544 -0.0342
11 12 11 -0.5465 -0.0359
11 12 12 -0.1575 -0.0021
11 12 13 -1.1048 0.0234
11 12 14 -0.6199 -0.0121
11 12 15 0.7783 -0.0149
11 12 16 -0.0396 0.0345
11 12 17 -0.8680 0.0181
11 13 0 -0.8646 0.0692
11 13 1 -3.2232 0.2623
11 13 2 -1.9166 0.0710
11 13 3 -0.5076 -0.0816
11 13 4 -0.8934 0.0161
11 13 5 -2.1505 0.0183
11 13 6 -0.4037 -0.0902
11 13 7 4.1802 -0.0653
11 13 8 4.1584 -0.0000
11 13 9 0.0186 0.0000
11 13 10 -0.2418 -0.0013
11 13 11 1.4445 0.0121
11 13 12 -1.0655 0.0354
11 13 13 -3.8668 0.0277
11 13 14 -1.3593 -0.0029
11 13 15 2.0988 0.0327
11 13 16 1.1912 0.0626
11 13 17 -0.3904 0.0124
11 14 0 0.9586 0.2946
11 14 1 -0.1938 0.1025
11 14 2 -0.0336 -0.1323
11 14 3 0.1411 -0.0716
11 14 4 -1.0289 0.0330
11 14 5 -2.3374 -0.0402
11 14 6 -0.7714 -0.0637
11 14 7 0.5848 0.0100
11 14 8 -1.5511 0.0115
11 14 9 -1.4817 0.0010
11 14 10 1.8548 0.0294
11 14 11 1.5813 0.0347
11 14 12 -1.0052 0.0325
11 14 13 0.0690 0.0241
11 14 14 2.3136 0.0230
11 14 15 0.4780 0.0366
11 15 0 -1.8166 0.0834
11 15 1 -3.7346 -0.1642
11 15 2 -0.8648 -0.1063
11 15 3 1.9718 0.0550
11 15 4 1.2542 0.0196
11 15 5 -0.0571 -0.0535
11 15 6 1.0871 0.0160
11 15 7 0.9562 0.0509
11 15 8 -0.7975 0.0010
11 15 9 0.4714 0.0080
11 15 10 2.1121 0.0201
11 15 11 0.5145 -0.0028
11 15 12 -0.8973 0.0058
11 15 13 -0.2578 0.0026
11 15 14 0.4747 -0.0299
11 16 3 2.2191 0.0601
11 16 4 -0.9839 -0.0221
11 16 5 -1.7050 0.0100
11 16 6 0.3499 0.0680
11 16 7 0.6751 0.0063
11 16 8 0.4334 -0.0188
11 16 9 1.4797 0.0428
11 16 10 0.2586 0.0275
11 16 11 -2.4852 -0.0131
11 16 12 -2.7374 0.0180
12 -12 1 -0.3823 -0.1510
12 -12 2 -1.6783 0.0304
12 -12 3 -0.9101 0.0030
12 -12 4 0.1849 0.0444
12 -11 0 -1.1887 -0.1513
12 -11 1 -3.3357 0.1781
12 -11 2 -1.7326 0.1168
12 -11 3 1.0136 0.0357
12 -11 4 1.8277 0.0513
12 -11 5 0.7047 -0.0196
12 -11 6 -0.4029 -0.0632
12 -11 7 -0.3400 -0.0345
12 -11 8 1.3814 -0.0154
12 -10 0 -3.6592 0.2684
12 -10 1 -0.4316 0.2620
12 -10 2 1.7476 0.0033
12 -10 3 1.1866 -0.0641
12 -10 4 -0.2119 -0.0408
12 -10 5 -0.9407 -0.0346
12 -10 6 -0.8209 -0.0161
12 -10 7 0.3104 -0.0367
12 -10 8 2.6607 -0.0336
12 -10 9 3.6198 0.0419
12 -10 10 1.9965 0.0741
12 -9 0 1.7515 0.3686
12 -9 1 1.7788 0.0183
12 -9 2 0.3111 -0.1709
12 -9 3 -0.4610 -0.1011
12 -9 4 -0.1035 -0.0361
12 -9 5 0.4908 -0.0155
12 -9 6 0.5694 -0.0103
12 -9 7 0.7164 -0.0063
12 -9 8 1.3975 0.0209
12 -9 9 0.0056 0.0380
12 -9 10 -2.7884 0.0530
12 -9 11 -2.2963 0.0865
12 -9 12 -0.1215 0.0567
12 -8 0 0.6005 -0.0394
12 -8 1 -0.4214 -0.3086
12 -8 2 -0.3370 -0.1576
12 -8 3 -0.0822 0.0144
12 -8 4 -0.1703 0.0489
12 -8 5 0.5357 0.0407
12 -8 6 1.3900 0.0292
12 -8 7 1.7148 0.0400
12 -8 8 1.2109 0.0515
12 -8 9 -1.0573 0.0464
12 -8 10 -1.9913 0.0370
12 -8 11 0.1816 -0.0040
12 -8 12 0.5264 -0.0444
12 -8 13 -0.4043 -0.0268
12 -7 0 0.8404 -0.3914
12 -7 1 1.5260 -0.1553
12 -7 2 0.9772 0.1029
12 -7 3 -0.4961 0.0795
12 -7 4 0.3917 0.0366
12 -7 5 2.5597 0.0407
12 -7 6 1.8554 0.0370
12 -7 7 -0.0757 0.0241
12 -7 8 -0.3652 -0.0222
12 -7 9 -0.4234 -0.0451
12 -7 10 -0.3455 -0.0251
12 -7 11 -0.3666 -0.0225
12 -7 12 -1.5063 -0.0230
12 -7 13 -0.5957 -0.0187
12 -7 14 1.3661 -0.0152
12 -6 0 0.9008 -0.1544
12 -6 1 0.2673 0.2390
12 -6 2 -0.4995 0.1838
12 -6 3 -0.3533 0.0304
12 -6 4 0.3233 0.0255
12 -6 5 0.2872 0.0009
12 -6 6 -0.3019 -0.0186
12 -6 7 0.3143 -0.0170
12 -6 8 0.2002 -0.0455
12 -6 9 -2.2270 -0.0315
12 -6 10 -2.9505 -0.0004
12 -6 11 -0.8745 -0.0042
12 -6 12 1.1758 0.0099
12 -6 13 2.9957 0.0241
12 -6 14 2.8389 0.0022
12 -6 15 -0.2772 -0.0269
12 -5 0 0.3736 0.2950
12 -5 1 -0.8906 0.3130
12 -5 2 -1.8642 0.0107
12 -5 3 -2.9820 -0.0623
12 -5 4 -0.6323 -0.0355
12 -5 5 2.5210 -0.0596
12 -5 6 1.3032 -0.0371
12 -5 7 -1.6532 -0.0402
12 -5 8 -2.6305 -0.0516
12 -5 9 -1.7889 0.0071
12 -5 10 -0.2506 0.0290
12 -5 11 0.0804 0.0166
12 -5 12 -0.0464 0.0466
12 -5 13 1.6491 0.0549
12 -5 14 2.1121 0.0242
12 -5 15 -0.4489 0.0097
12 -5 16 -2.0523 0.0040
12 -4 0 0.1821 0.4057
12 -4 1 0.6845 -0.0132
12 -4 2 -0.8305 -0.2136
12 -4 3 -0.6957 -0.0875
12 -4 4 2.0239 -0.0369
12 -4 5 0.7326 -0.0469
12 -4 6 -2.3485 -0.0152
12 -4 7 -0.8459 -0.0063
12 -4 8 1.1149 0.0191
12 -4 9 -0.1727 0.0396
12 -4 10 -0.4978 0.0098
12 -4 11 1.4318 0.0142
12 -4 12 2.8018 0.0271
12 -4 13 1.7512 -0.0119
12 -4 14 -2.1228 -0.0325
12 -4 15 -4.8014 -0.0259
12 -4 16 -2.4127 -0.0409
12 -4 17 1.7245 -0.0500
12 -3 0 0.1389 -0.0378
12 -3 1 -0.9334 -0.3282
12 -3 2 -2.0833 -0.1453
12 -3 3 -0.2025 0.0241
12 -3 4 1.4146 -0.0158
12 -3 5 0.1192 -0.0059
12 -3 6 0.0773 0.0595
12 -3 7 0.9206 0.0635
12 -3 8 -0.1283 0.0356
12 -3 9 -0.0573 0.0038
12 -3 10 1.3379 -0.0036
12 -3 11 0.0815 0.0066
12 -3 12 -1.6097 -0.0089
12 -3 13 -0.3038 -0.0128
12 -3 14 1.1212 -0.0089
12 -3 15 0.8662 -0.0323
12 -3 16 0.0946 -0.0197
12 -3 17 -1.2442 0.0273
12 -2 0 2.1065 -0.4272
12 -2 1 -0.6288 -0.1837
12 -2 2 -2.1521 0.1295
12 -2 3 0.3660 0.0940
12 -2 4 2.4388 0.0025
12 -2 5 1.6692 0.0425
12 -2 6 0.5602 0.0545
12 -2 7 0.1200 0.0097
12 -2 8 0.4139 -0.0134
12 -2 9 0.1301 -0.0107
12 -2 10 -2.1930 -0.0084
12 -2 11 -3.3664 -0.0220
12 -2 12 -0.8209 -0.0150
12 -2 13 0.8452 0.0133
12 -2 14 -1.4086 0.0031
12 -2 15 -2.6035 0.0002
12 -2 16 -0.0644 0.0261
12 -2 17 2.2260 -0.0014
12 -2 18 1.9487 -0.0230
12 -1 0 -1.2315 -0.1994
12 -1 1 -1.8695 0.2361
12 -1 2 1.3054 0.2141
12 -1 3 4.0044 0.0127
12 -1 4 1.1330 0.0028
12 -1 5 -2.6624 0.0359
12 -1 6 -2.4049 -0.0075
12 -1 7 -0.3649 -0.0475
12 -1 8 0.6976 -0.0569
12 -1 9 0.3445 -0.0415
12 -1 10 0.3937 -0.0231
12 -1 11 2.3101 -0.0172
12 -1 12 3.6692 0.0123
12 -1 13 2.0508 0.0366
12 -1 14 -0.1613 0.0230
12 -1 15 0.1747 0.0171
12 -1 16 1.2576 0.0008
12 -1 17 0.3818 -0.0239
12 -1 18 -0.7832 -0.0033
12 0 0 1.3361 0.3092
12 0 1 1.1205 0.3274
12 0 2 2.3381 -0.0062
12 0 3 2.2153 -0.0922
12 0 4 -0.2620 -0.0152
12 0 5 -0.2489 -0.0287
12 0 6 0.5570 -0.0512
12 0 7 0.4486 -0.0352
12 0 8 0.7358 -0.0143
12 0 9 -0.7968 0.0130
12 0 10 -3.5282 0.0103
12 0 11 -3.6889 0.0083
12 0 12 -2.0151 0.0533
12 0 13 -0.9278 0.0563
12 0 14 0.1989 0.0027
12 0 15 1.7223 -0.0149
12 0 16 1.1528 -0.0066
12 0 17 -1.6281 -0.0100
12 0 18 -2.4991 -0.0308
12 0 19 -0.2777 -0.0562
12 1 0 -1.2666 0.4064
12 1 1 -0.0033 -0.0179
12 1 2 1.9855 -0.2019
12 1 3 0.0702 -0.0564
12 1 4 -2.1066 -0.0198
12 1 5 -1.5197 -0.0682
12 1 6 -0.9240 -0.0329
12 1 7 1.3464 0.0089
12 1 8 2.7306 0.0306
12 1 9 -0.1311 0.0457
12 1 10 -0.7979 0.0268
12 1 11 1.8366 0.0248
12 1 12 1.0951 0.0343
12 1 13 -1.8323 -0.0067
12 1 14 -1.9577 -0.0301
12 1 15 -0.9494 -0.0068
12 1 16 -1.5703 -0.0191
12 1 17 -1.0920 -0.0422
12 1 18 2.3273 -0.0124
12 1 19 4.1802 0.0354
12 2 0 2.7229 -0.0716
12 2 1 0.2135 -0.3505
12 2 2 1.7221 -0.1266
12 2 3 0.4228 0.0448
12 2 4 -1.9313 -0.0182
12 2 5 -2.8741 -0.0118
12 2 6 -2.4750 0.0550
12 2 7 -0.6071 0.0513
12 2 8 -1.4839 0.0374
12 2 9 -2.7874 0.0240
12 2 10 0.0786 -0.0061
12 2 11 1.4177 -0.0056
12 2 12 0.2623 0.0006
12 2 13 2.4653 -0.0155
12 2 14 4.7042 -0.0164
12 2 15 2.1549 -0.0162
12 2 16 -0.4372 -0.0259
12 2 17 1.2381 -0.0039
12 2 18 2.9342 0.0191
12 2 19 -0.0162 -0.0016
12 3 0 -5.4108 -0.4362
12 3 1 -0.5024 -0.1492
12 3 2 2.7098 0.1642
12 3 3 -2.0023 0.0919
12 3 4 -3.1461 0.0004
12 3 5 -1.1929 0.0603
12 3 6 0.2179 0.0631
12 3 7 3.0626 0.0131
12 3 8 4.0995 0.0034
12 3 9 2.1988 -0.0122
12 3 10 -0.9129 -0.0352
12 3 11 -3.9373 -0.0295
12 3 12 -2.7452 -0.0196
12 3 13 0.5316 -0.0144
12 3 14 -0.2929 -0.0022
12 3 15 -1.9224 0.0068
12 3 16 0.2820 0.0116
12 3 17 2.2909 0.0182
12 3 18 -0.0192 0.0099
12 3 19 -3.4694 -0.0080
12 4 0 -3.0480 -0.1544
12 4 1 2.7099 0.2789
12 4 2 1.8860 0.2230
12 4 3 -2.0504 0.0030
12 4 4 -1.3910 0.0076
12 4 5 -1.3881 0.0368
12 4 6 0.9689 -0.0265
12 4 7 4.5165 -0.0474
12 4 8 0.7399 -0.0311
12 4 9 -3.8484 -0.0373
12 4 10 -1.8212 -0.0386
12 4 11 2.0022 -0.0190
12 4 12 3.4487 0.0081
12 4 13 1.6234 0.0219
12 4 14 -1.7411 0.0158
12 4 15 -2.4551 0.0096
12 4 16 -0.7000 0.0096
12 4 17 0.0646 0.0091
12 4 18 -0.8644 -0.0039
12 4 19 -1.1688 -0.0171
12 5 0 2.0355 0.3336
12 5 1 5.5190 0.3093
12 5 2 -0.4604 -0.0454
12 5 3 -3.6040 -0.1122
12 5 4 -1.8231 -0.0093
12 5 5 -0.4198 -0.0412
12 5 6 2.2116 -0.0802
12 5 7 0.7932 -0.0331
12 5 8 -3.7347 -0.0019
12 5 9 -1.7867 -0.0028
12 5 10 1.5207 0.0056
12 5 11 0.0919 0.0335
12 5 12 -0.4869 0.0551
12 5 13 0.0621 0.0339
12 5 14 -0.8843 0.0091
12 5 15 0.0461 0.0136
12 5 16 3.0287 0.0062
12 5 17 3.2182 -0.0156
12 5 18 0.0595 -0.0272
12 5 19 -1.6111 -0.0077
12 6 0 -0.1150 0.3553
12 6 1 1.6886 -0.0625
12 6 2 -0.2331 -0.2274
12 6 3 0.9401 -0.0482
12 6 4 1.2504 -0.0001
12 6 5 0.3015 -0.0754
12 6 6 1.1746 -0.0348
12 6 7 0.5874 0.0357
12 6 8 0.5551 0.0364
12 6 9 1.9729 0.0281
12 6 10 0.1181 0.0308
12 6 11 -1.1092 0.0277
12 6 12 0.4891 0.0099
12 6 13 -0.9212 -0.0094
12 6 14 -2.6289 -0.0006
12 6 15 0.0845 -0.0009
12 6 16 1.6729 -0.0228
12 6 17 -1.1067 -0.0140
12 6 18 -2.5725 0.0071
12 6 19 0.3943 0.0197
12 7 0 3.3657 -0.0974
12 7 1 1.6889 -0.3527
12 7 2 -3.0120 -0.1137
12 7 3 -4.6731 0.0789
12 7 4 -4.3540 -0.0042
12 7 5 -0.6139 -0.0261
12 7 6 3.3557 0.0665
12 7 7 1.6561 0.0731
12 7 8 -1.1408 0.0235
12 7 9 -1.0608 0.0100
12 7 10 -0.1066 0.0064
12 7 11 0.8466 -0.0008
12 7 12 -0.3147 -0.0099
12 7 13 -2.4780 -0.0241
12 7 14 -0.6795 -0.0309
12 7 15 2.4695 -0.0291
12 7 16 2.2147 -0.0122
12 7 17 1.1943 -0.0032
12 7 18 1.8498 -0.0140
12 7 19 1.5385 0.0074
12 8 0 1.9694 -0.4180
12 8 1 -1.5824 -0.1395
12 8 2 -1.8300 0.1799
12 8 3 1.6265 0.1087
12 8 4 4.6998 -0.0145
12 8 5 4.9868 0.0386
12 8 6 -0.4538 0.0665
12 8 7 -6.1367 0.0100
12 8 8 -4.0463 -0.0069
12 8 9 -0.2235 0.0019
12 8 10 -1.1143 -0.0194
12 8 11 -2.0510 -0.0318
12 8 12 -0.5264 -0.0200
12 8 13 0.9999 -0.0071
12 8 14 1.3423 0.0045
12 8 15 0.6162 0.0112
12 8 16 0.0636 0.0076
12 8 17 0.0524 -0.0009
12 8 18 -0.6030 0.0181
12 8 19 -1.8492 0.0301
12 9 0 -3.1082 -0.1101
12 9 1 -1.2776 0.2844
12 9 2 -0.7327 0.2078
12 9 3 -1.6282 -0.0168
12 9 4 -1.4505 -0.0158
12 9 5 -1.2120 0.0355
12 9 6 -0.7411 0.0021
12 9 7 3.0427 -0.0248
12 9 8 5.5861 -0.0207
12 9 9 1.8303 -0.0263
12 9 10 -1.0092 -0.0281
12 9 11 1.1001 -0.0054
12 9 12 1.2196 0.0127
12 9 13 -1.2476 0.0150
12 9 14 -0.7542 0.0280
12 9 15 1.6295 0.0448
12 9 16 2.1163 0.0330
12 9 17 0.9481 0.0083
12 9 18 -0.1557 0.0161
12 10 0 2.5943 0.3131
12 10 1 1.0621 0.2757
12 10 2 -0.8075 -0.0366
12 10 3 1.5394 -0.0830
12 10 4 2.9366 -0.0035
12 10 5 0.0296 -0.0284
12 10 6 -2.0642 -0.0475
12 10 7 -2.2760 -0.0269
12 10 8 -3.6242 -0.0151
12 10 9 -2.8036 -0.0067
12 10 10 1.7568 -0.0021
12 10 11 3.0423 0.0062
12 10 12 0.1007 0.0091
12 10 13 -0.2035 -0.0029
12 10 14 1.3515 -0.0015
12 10 15 0.3500 -0.0008
12 10 16 -0.9519 -0.0327
12 10 17 -0.6569 -0.0447
12 10 18 -0.7310 -0.0074
12 11 0 -2.1203 0.3107
12 11 1 -3.7830 -0.0670
12 11 2 -3.0679 -0.2096
12 11 3 -0.9955 -0.0492
12 11 4 -0.0531 -0.0119
12 11 5 1.8153 -0.0435
12 11 6 3.2640 0.0070
12 11 7 0.5156 0.0302
12 11 8 -2.3118 0.0179
12 11 9 -1.2959 0.0103
12 11 10 -1.0371 0.0061
12 11 11 -2.8700 0.0264
12 11 12 -1.5407 0.0298
12 11 13 1.6892 0.0097
12 11 14 1.2536 0.0113
12 11 15 -0.3647 -0.0137
12 11 16 0.8756 -0.0663
12 11 17 1.8856 -0.0459
12 12 0 -1.9690 -0.0615
12 12 1 -1.0320 -0.2969
12 12 2 1.5354 -0.0965
12 12 3 3.6396 0.0674
12 12 4 3.5106 -0.0141
12 12 5 1.8563 -0.0086
12 12 6 -0.7866 0.0632
12 12 7 -1.6974 0.0401
12 12 8 1.2370 0.0135
12 12 9 3.2591 0.0095
12 12 10 1.4469 0.0042
12 12 11 0.3007 -0.0014
12 12 12 1.0992 -0.0344
12 12 13 0.0013 -0.0312
12 12 14 -1.8718 0.0160
12 12 15 -0.3046 -0.0021
12 12 16 2.0704 -0.0420
12 12 17 0.3579 -0.0059
12 13 0 0.3640 -0.3189
12 13 1 1.3143 -0.1408
12 13 2 0.5650 0.1543
12 13 3 0.2781 0.0951
12 13 4 0.9494 -0.0279
12 13 5 1.0113 0.0523
12 13 6 -2.1248 0.0629
12 13 7 -5.1693 -0.0311
12 13 8 -4.3476 -0.0516
12 13 9 -2.5248 -0.0349
12 13 10 -1.1060 -0.0148
12 13 11 1.8297 -0.0028
12 13 12 4.3267 -0.0197
12 13 13 3.0774 -0.0100
12 13 14 -0.1719 -0.0071
12 13 15 -1.6432 -0.0394
12 13 16 -1.8334 0.0023
12 14 0 -0.7772 -0.1195
12 14 1 -2.2426 0.1965
12 14 2 -1.0258 0.1999
12 14 3 1.4623 -0.0319
12 14 4 2.7273 -0.0374
12 14 5 0.3335 0.0613
12 14 6 -3.5029 -0.0048
12 14 7 -2.1195 -0.0441
12 14 8 1.9387 0.0082
12 14 9 1.6480 0.0015
12 14 10 0.1988 -0.0329
12 14 11 1.5736 -0.0477
12 14 12 1.3956 -0.0314
12 14 13 -2.1055 0.0304
12 14 14 -3.0115 0.0492
12 15 3 1.6285 -0.1439
12 15 4 0.1467 0.0081
12 15 5 -3.0765 0.0312
12 15 6 -4.0014 -0.0594
12 15 7 0.0906 -0.0296
12 15 8 2.3863 0.0099
12 15 9 0.6788 -0.0043
12 15 10 0.5064 0.0283
12 15 11 1.1055 0.0473
12 15 12 -0.9405 0.0247
13 -10 0 2.5225 -0.3264
13 -10 1 -0.1417 0.0291
13 -10 2 -3.3317 0.0920
13 -10 3 -2.7138 0.0188
13 -10 4 0.2626 0.0741
13 -10 5 0.9140 0.0622
13 -10 6 -0.0265 -0.0023
13 -10 7 -0.2860 0.0041
13 -9 0 -1.9323 0.0448
13 -9 1 -1.3097 0.2784
13 -9 2 -1.0099 0.1273
13 -9 3 -0.8563 0.0148
13 -9 4 -1.0752 -0.0041
13 -9 5 -1.5491 -0.0280
13 -9 6 -1.0227 -0.0081
13 -9 7 -0.0955 -0.0159
13 -9 8 1.0098 -0.0793
13 -9 9 2.2769 -0.0588
13 -9 10 1.7002 0.0252
13 -8 0 0.0602 0.3676
13 -8 1 2.1535 0.1989
13 -8 2 1.3592 -0.0418
13 -8 3 0.9488 -0.0839
13 -8 4 1.5257 -0.0714
13 -8 5 1.4046 -0.0408
13 -8 6 0.9749 -0.0067
13 -8 7 1.0271 -0.0205
13 -8 8 2.2333 -0.0433
13 -8 9 2.8424 -0.0264
13 -8 10 0.5692 0.0297
13 -8 11 -1.4818 0.0834
13 -7 0 1.8156 0.1955
13 -7 1 -1.0448 -0.1552
13 -7 2 -2.6600 -0.1643
13 -7 3 -0.2521 -0.0482
13 -7 4 0.1320 -0.0080
13 -7 5 -1.5783 0.0084
13 -7 6 -0.8816 0.0136
13 -7 7 1.3054 0.0283
13 -7 8 2.4998 0.0387
13 -7 9 1.5974 0.0360
13 -7 10 -0.5413 0.0471
13 -7 11 -0.9547 0.0179
13 -7 12 -0.5533 -0.0221
13 -7 13 -1.0454 0.0275
13 -6 0 1.3571 -0.2587
13 -6 1 0.9946 -0.2628
13 -6 2 2.2937 0.0073
13 -6 3 1.5546 0.0576
13 -6 4 -1.3072 0.0155
13 -6 5 -0.5688 0.0291
13 -6 6 2.0698 0.0467
13 -6 7 2.0249 0.0440
13 -6 8 1.2947 -0.0066
13 -6 9 0.4798 -0.0309
13 -6 10 -2.0556 0.0027
13 -6 11 -4.1514 -0.0092
13 -6 12 -4.1500 -0.0267
13 -6 13 -1.8316 -0.0071
13 -6 14 2.1368 -0.0310
13 -5 0 0.1016 -0.3880
13 -5 1 -0.6024 0.0255
13 -5 2 0.8245 0.1803
13 -5 3 1.7272 0.0497
13 -5 4 0.6409 0.0198
13 -5 5 -0.3319 0.0348
13 -5 6 -0.7604 0.0285
13 -5 7 -0.1226 0.0251
13 -5 8 1.0224 -0.0202
13 -5 9 -0.2894 -0.0408
13 -5 10 -2.1523 -0.0316
13 -5 11 -0.5755 -0.0534
13 -5 12 1.9653 -0.0358
13 -5 13 2.5113 0.0141
13 -5 14 1.6941 0.0176
13 -5 15 -0.1736 -0.0036
13 -4 0 -0.9556 0.0522
13 -4 1 -0.8812 0.3393
13 -4 2 0.5756 0.1512
13 -4 3 -1.3533 -0.0040
13 -4 4 -3.7624 0.0087
13 -4 5 -1.3331 -0.0115
13 -4 6 1.9330 -0.0183
13 -4 7 1.9754 -0.0283
13 -4 8 0.7802 -0.0671
13 -4 9 0.0348 -0.0324
13 -4 10 -0.6063 0.0048
13 -4 11 -1.6105 -0.0125
13 -4 12 -2.4410 0.0178
13 -4 13 -1.0259 0.0671
13 -4 14 1.9323 0.0508
13 -4 15 2.6631 0.0122
13 -4 16 0.5447 0.0244
13 -3 0 -0.9527 0.3865
13 -3 1 0.3205 0.1958
13 -3 2 1.3358 -0.0939
13 -3 3 -0.8021 -0.0906
13 -3 4 0.0080 -0.0354
13 -3 5 2.2718 -0.0442
13 -3 6 0.3821 -0.0314
13 -3 7 -1.9800 -0.0367
13 -3 8 -1.4792 -0.0263
13 -3 9 -1.4538 0.0135
13 -3 10 -2.1991 -0.0012
13 -3 11 -0.8119 -0.0043
13 -3 12 1.3631 0.0446
13 -3 13 1.7051 0.0426
13 -3 14 0.4220 -0.0029
13 -3 15 -1.0129 -0.0201
13 -3 16 -0.9131 -0.0299
13 -2 0 -2.7009 0.1923
13 -2 1 -1.3253 -0.1985
13 -2 2 -1.5034 -0.1975
13 -2 3 -1.7077 -0.0192
13 -2 4 -0.1497 0.0007
13 -2 5 -0.9539 -0.0299
13 -2 6 -2.0535 -0.0091
13 -2 7 -0.1671 0.0185
13 -2 8 1.6553 0.0345
13 -2 9 1.8711 0.0151
13 -2 10 2.1115 -0.0024
13 -2 11 1.6760 0.0195
13 -2 12 0.1502 0.0116
13 -2 13 0.3503 -0.0165
13 -2 14 2.0889 -0.0148
13 -2 15 1.6294 -0.0259
13 -2 16 -0.7537 -0.0273
13 -2 17 -2.0881 0.0300
13 -1 0 -0.6278 -0.2719
13 -1 1 0.2390 -0.2814
13 -1 2 0.0125 0.0036
13 -1 3 2.0634 0.0774
13 -1 4 3.3363 0.0053
13 -1 5 2.0631 0.0084
13 -1 6 1.0468 0.0416
13 -1 7 -0.1753 0.0422
13 -1 8 -0.7254 0.0154
13 -1 9 0.2873 -0.0062
13 -1 10 -0.3387 0.0060
13 -1 11 -2.3068 -0.0074
13 -1 12 -1.9856 -0.0405
13 -1 13 -0.3316 -0.0132
13 -1 14 -0.9800 0.0052
13 -1 15 -2.8298 -0.0212
13 -1 16 -1.8769 0.0041
13 -1 17 0.8581 0.0351
13 0 0 -1.4788 -0.3733
13 0 1 -0.1719 0.0211
13 0 2 1.7554 0.1945
13 0 3 2.9274 0.0735
13 0 4 0.3230 0.0085
13 0 5 -1.6222 0.0150
13 0 6 -0.8163 0.0072
13 0 7 -0.1043 -0.0025
13 0 8 1.5163 -0.0280
13 0 9 2.2921 -0.0341
13 0 10 0.3105 -0.0147
13 0 11 -0.2951 -0.0319
13 0 12 0.7530 -0.0276
13 0 13 -0.1061 0.0248
13 0 14 -1.5832 0.0280
13 0 15 -0.4139 0.0148
13 0 16 2.5129 0.0387
13 0 17 3.0847 0.0375
13 0 18 0.3090 0.0284
13 1 0 1.4795 0.0348
13 1 1 -1.4238 0.2980
13 1 2 -0.6969 0.1126
13 1 3 1.0374 -0.0363
13 1 4 0.0434 -0.0070
13 1 5 0.6406 -0.0078
13 1 6 0.0478 -0.0292
13 1 7 -2.6793 -0.0351
13 1 8 -1.3099 -0.0413
13 1 9 0.7392 -0.0071
13 1 10 -0.2658 0.0075
13 1 11 -0.0656 -0.0264
13 1 12 1.2658 0.0038
13 1 13 1.3994 0.0599
13 1 14 1.6608 0.0341
13 1 15 2.4145 0.0016
13 1 16 1.5669 0.0117
13 1 17 -1.8830 0.0069
13 1 18 -4.5851 -0.0252
13 2 0 -2.7434 0.3881
13 2 1 0.1367 0.1686
13 2 2 5.8480 -0.1125
13 2 3 5.4268 -0.0761
13 2 4 3.0394 -0.0176
13 2 5 3.0849 -0.0568
13 2 6 -1.4557 -0.0418
13 2 7 -3.8341 -0.0044
13 2 8 1.5271 0.0101
13 2 9 2.3068 0.0244
13 2 10 -1.6848 0.0062
13 2 11 -1.4810 0.0004
13 2 12 -1.2203 0.0463
13 2 13 -3.6847 0.0432
13 2 14 -3.3895 -0.0119
13 2 15 -0.4220 -0.0164
13 2 16 0.1339 -0.0029
13 2 17 -1.5901 -0.0269
13 2 18 -0.6434 -0.0364
13 3 0 1.6464 0.1778
13 3 1 1.1361 -0.2280
13 3 2 0.5917 -0.1919
13 3 3 -1.4208 0.0103
13 3 4 -1.7252 -0.0019
13 3 5 -3.4184 -0.0386
13 3 6 -6.9325 0.0174
13 3 7 -1.9929 0.0391
13 3 8 3.8170 0.0281
13 3 9 0.4148 0.0260
13 3 10 -0.0104 0.0163
13 3 11 4.1974 0.0179
13 3 12 1.9139 0.0197
13 3 13 -1.2985 -0.0075
13 3 14 1.1488 -0.0250
13 3 15 1.8907 -0.0174
13 3 16 -1.6378 -0.0217
13 3 17 -2.5188 -0.0218
13 3 18 1.0133 0.0116
13 4 0 -2.7421 -0.2939
13 4 1 -2.5153 -0.3036
13 4 2 0.4268 0.0212
13 4 3 0.4691 0.0883
13 4 4 0.1594 -0.0082
13 4 5 -1.5263 0.0201
13 4 6 -2.5691 0.0608
13 4 7 1.9274 0.0285
13 4 8 3.4930 0.0052
13 4 9 0.8049 -0.0006
13 4 10 1.2613 -0.0075
13 4 11 -0.5560 -0.0135
13 4 12 -4.3267 -0.0246
13 4 13 -0.7380 -0.0270
13 4 14 4.0133 -0.0160
13 4 15 1.6060 -0.0079
13 4 16 -1.3047 -0.0050
13 4 17 0.5860 0.0103
13 4 18 2.6347 0.0342
13 4 19 1.1385 0.0222
13 5 0 -3.7127 -0.3561
13 5 1 -2.0475 0.0525
13 5 2 2.2398 0.2264
13 5 3 2.0566 0.0641
13 5 4 1.8432 0.0016
13 5 5 -0.2201 0.0439
13 5 6 -0.2825 0.0178
13 5 7 4.1781 -0.0180
13 5 8 2.8386 -0.0239
13 5 9 -1.9643 -0.0195
13 5 10 -1.6634 -0.0078
13 5 11 -0.7277 -0.0218
13 5 12 -0.6398 -0.0353
13 5 13 0.4953 -0.0073
13 5 14 -0.9758 0.0144
13 5 15 -3.3725 0.0069
13 5 16 -1.8963 0.0037
13 5 17 1.0325 0.0232
13 5 18 1.3192 0.0363
13 5 19 -0.4228 0.0034
13 6 0 -2.3699 0.0654
13 6 1 3.0531 0.2932
13 6 2 2.9891 0.0849
13 6 3 -0.2761 -0.0628
13 6 4 -1.0593 0.0017
13 6 5 -2.2897 0.0060
13 6 6 0.4046 -0.0445
13 6 7 2.8333 -0.0410
13 6 8 -2.3558 -0.0276
13 6 9 -3.9127 -0.0123
13 6 10 1.2023 -0.0031
13 6 11 1.6440 -0.0157
13 6 12 -0.3717 0.0073
13 6 13 0.9624 0.0366
13 6 14 1.2358 0.0112
13 6 15 -0.7203 -0.0084
13 6 16 -1.0522 0.0097
13 6 17 0.2116 0.0228
13 6 18 0.3267 0.0009
13 7 0 -1.0458 0.3380
13 7 1 0.8309 0.1178
13 7 2 -0.3265 -0.1337
13 7 3 0.2182 -0.0784
13 7 4 1.1381 -0.0042
13 7 5 0.5690 -0.0550
13 7 6 1.3080 -0.0577
13 7 7 -1.0073 -0.0128
13 7 8 -3.6978 0.0034
13 7 9 0.8212 0.0231
13 7 10 3.5535 0.0270
13 7 11 -0.3776 0.0072
13 7 12 -0.9121 0.0127
13 7 13 1.2684 0.0231
13 7 14 -0.6207 0.0236
13 7 15 -2.2583 0.0221
13 7 16 0.0923 0.0016
13 7 17 1.8789 -0.0078
13 7 18 0.5809 -0.0041
13 8 0 0.2936 0.1165
13 8 1 3.5953 -0.2172
13 8 2 3.3123 -0.1697
13 8 3 1.4674 0.0143
13 8 4 -0.5503 -0.0026
13 8 5 -0.3606 -0.0519
13 8 6 2.1816 0.0119
13 8 7 1.9042 0.0537
13 8 8 0.7476 0.0338
13 8 9 1.7001 0.0300
13 8 10 0.7805 0.0273
13 8 11 -0.9919 0.0092
13 8 12 -1.0299 0.0054
13 8 13 -2.0291 0.0053
13 8 14 -2.7632 -0.0092
13 8 15 -0.8918 -0.0271
13 8 16 0.4397 -0.0117
13 8 17 -0.1703 0.0205
13 8 18 -0.0604 -0.0041
13 9 0 3.3287 -0.2847
13 9 1 1.3790 -0.2736
13 9 2 -2.8291 0.0174
13 9 3 -3.5137 0.0708
13 9 4 -1.8206 -0.0135
13 9 5 0.3695 0.0272
13 9 6 -0.0931 0.0851
13 9 7 -4.1562 0.0404
13 9 8 -4.4742 -0.0051
13 9 9 -0.0196 0.0074
13 9 10 0.7656 -0.0034
13 9 11 -2.1596 -0.0446
13 9 12 -1.8721 -0.0425
13 9 13 1.7243 -0.0151
13 9 14 3.0680 -0.0220
13 9 15 0.5866 -0.0334
13 9 16 -1.0082 -0.0047
13 9 17 0.6969 0.0054
13 9 18 2.3202 -0.0196
13 10 0 -0.8129 -0.3034
13 10 1 -2.7833 0.0666
13 10 2 -2.5163 0.1902
13 10 3 -1.9862 0.0420
13 10 4 0.1119 0.0190
13 10 5 3.2861 0.0622
13 10 6 2.3045 0.0177
13 10 7 -0.8126 -0.0322
13 10 8 0.3169 -0.0248
13 10 9 1.6557 -0.0034
13 10 10 -1.2521 -0.0166
13 10 11 -2.0541 -0.0269
13 10 12 1.6147 0.0149
13 10 13 2.4112 0.0463
13 10 14 -1.4812 0.0226
13 10 15 -3.1340 0.0123
13 10 16 -0.0642 0.0309
13 10 17 2.3772 0.0102
13 11 0 0.6395 0.0972
13 11 1 2.5876 0.2962
13 11 2 0.9481 0.0636
13 11 3 -0.3721 -0.0614
13 11 4 1.3112 0.0121
13 11 5 0.3916 -0.0025
13 11 6 -2.4195 -0.0388
13 11 7 -0.1814 -0.0268
13 11 8 4.7155 -0.0237
13 11 9 4.3705 -0.0057
13 11 10 0.3363 0.0041
13 11 11 -1.2413 -0.0051
13 11 12 -1.1081 0.0077
13 11 13 -2.0111 0.0005
13 11 14 -2.2368 -0.0197
13 11 15 -0.2057 0.0237
13 11 16 1.9314 0.0644
13 12 0 -0.0033 0.2878
13 12 1 -2.8219 0.0428
13 12 2 -7.1265 -0.1796
13 12 3 -4.5842 -0.0491
13 12 4 0.8618 0.0203
13 12 5 2.7196 -0.0596
13 12 6 1.8275 -0.0430
13 12 7 -0.8251 -0.0136
13 12 8 -4.2925 -0.0116
13 12 9 -5.3554 0.0228
13 12 10 -3.3457 0.0029
13 12 11 -0.2824 -0.0244
13 12 12 2.3902 0.0155
13 12 13 3.3175 0.0180
13 12 14 1.9620 -0.0157
13 12 15 0.4004 -0.0048
13 13 1 -2.3058 -0.2285
13 13 2 -1.5460 -0.1731
13 13 3 1.8173 0.0272
13 13 4 2.0478 -0.0055
13 13 5 -0.0847 -0.0273
13 13 6 -0.2646 0.0504
13 13 7 2.0628 0.0308
13 13 8 4.7240 0.0156
13 13 9 3.6320 0.0390
13 13 10 -1.2503 -0.0043
13 13 11 -3.4709 -0.0107
13 13 12 -1.4317 0.0235
13 13 13 -0.1349 -0.0044
13 13 14 -0.2280 -0.0078
13 14 3 0.9746 0.1315
13 14 4 2.1341 0.0016
13 14 5 2.7997 0.0055
13 14 6 2.2659 0.0404
13 14 7 -0.0374 -0.0198
13 14 8 -2.3248 -0.0161
13 14 9 -3.6740 -0.0001
13 14 10 -2.7934 -0.0171
13 14 11 0.5422 0.0262
13 14 12 2.4095 0.0268
14 -9 2 1.8801 0.0671
14 -9 3 0.9518 0.0372
14 -9 4 1.1627 0.0373
14 -9 5 2.0871 0.0515
14 -9 6 1.0506 0.0192
14 -8 0 -0.7397 -0.1933
14 -8 1 -1.5301 0.1592
14 -8 2 -2.0762 0.1544
14 -8 3 -2.9584 0.0423
14 -8 4 -3.3965 0.0172
14 -8 5 -3.1855 -0.0000
14 -8 6 -2.9016 0.0130
14 -8 7 -2.5950 0.0465
14 -8 8 -0.6684 0.0002
14 -8 9 2.6780 -0.0819
14 -7 0 -1.4815 0.2166
14 -7 1 2.0166 0.2416
14 -7 2 3.4773 0.0518
14 -7 3 0.5303 -0.0076
14 -7 4 -0.6678 -0.0244
14 -7 5 1.1731 -0.0413
14 -7 6 1.2742 -0.0245
14 -7 7 -0.6835 -0.0052
14 -7 8 -0.2122 -0.0064
14 -7 9 1.9433 -0.0316
14 -7 10 1.2274 -0.0324
14 -7 11 -0.2065 -0.0048
14 -6 0 -0.1087 0.2924
14 -6 1 -0.8137 -0.0260
14 -6 2 -3.5514 -0.1229
14 -6 3 -2.0921 -0.0370
14 -6 4 3.1152 -0.0091
14 -6 5 3.5335 -0.0202
14 -6 6 -0.9230 -0.0387
14 -6 7 -2.2822 -0.0042
14 -6 8 1.5223 0.0481
14 -6 9 4.6449 0.0203
14 -6 10 3.9832 0.0047
14 -6 11 2.3884 0.0283
14 -6 12 0.1308 0.0206
14 -5 0 -0.1476 -0.0136
14 -5 1 1.0679 -0.2507
14 -5 2 0.6216 -0.0853
14 -5 3 1.1376 0.0294
14 -5 4 0.7396 0.0092
14 -5 5 -0.9159 -0.0094
14 -5 6 -1.1884 0.0001
14 -5 7 0.2447 0.0608
14 -5 8 1.7567 0.0626
14 -5 9 1.7073 -0.0039
14 -5 10 -0.3130 0.0055
14 -5 11 -2.6324 0.0135
14 -5 12 -3.9982 -0.0291
14 -5 13 -3.4250 -0.0078
14 -4 0 4.0198 -0.4150
14 -4 1 0.8874 -0.1900
14 -4 2 -1.0015 0.1058
14 -4 3 0.5322 0.0897
14 -4 4 2.2664 0.0272
14 -4 5 1.2559 0.0112
14 -4 6 -1.2465 0.0169
14 -4 7 -1.5545 0.0626
14 -4 8 0.3040 0.0352
14 -4 9 0.7669 -0.0293
14 -4 10 -0.2519 -0.0286
14 -4 11 -0.2724 -0.0381
14 -4 12 -0.0405 -0.0539
14 -4 13 -0.2602 -0.0307
14 -4 14 0.7509 -0.0197
14 -3 0 -0.4781 -0.1941
14 -3 1 -3.3219 0.1830
14 -3 2 -3.8901 0.1741
14 -3 3 -0.9593 0.0350
14 -3 4 0.7037 0.0287
14 -3 5 -0.4244 0.0080
14 -3 6 -1.0004 -0.0053
14 -3 7 0.2678 0.0160
14 -3 8 0.8895 -0.0193
14 -3 9 0.5559 -0.0264
14 -3 10 0.3619 0.0122
14 -3 11 -0.6956 -0.0133
14 -3 12 -2.1081 -0.0442
14 -3 13 -0.9885 -0.0006
14 -3 14 1.7202 0.0533
14 -3 15 1.5074 0.0349
14 -2 0 1.5569 0.2673
14 -2 1 -1.2651 0.2960
14 -2 2 0.7900 0.0369
14 -2 3 2.3415 -0.0396
14 -2 4 1.4542 -0.0151
14 -2 5 0.4377 -0.0360
14 -2 6 -0.2921 -0.0193
14 -2 7 -1.3245 -0.0123
14 -2 8 -1.8155 -0.0353
14 -2 9 -0.7678 -0.0152
14 -2 10 0.0149 -0.0138
14 -2 11 -0.3240 -0.0416
14 -2 12 -0.1362 -0.0101
14 -2 13 0.0904 0.0440
14 -2 14 -1.0390 0.0432
14 -2 15 -2.2570 0.0088
14 -2 16 -1.3678 0.0020
14 -1 0 0.8662 0.3282
14 -1 1 -0.4980 -0.0513
14 -1 2 -2.6435 -0.1866
14 -1 3 -4.2751 -0.0456
14 -1 4 -1.3118 0.0023
14 -1 5 0.8246 -0.0311
14 -1 6 0.2646 -0.0242
14 -1 7 0.5788 -0.0005
14 -1 8 1.3454 0.0290
14 -1 9 0.8789 0.0265
14 -1 10 -0.6002 -0.0093
14 -1 11 -1.2202 -0.0012
14 -1 12 -0.0430 0.0203
14 -1 13 1.6197 0.0098
14 -1 14 2.7667 0.0070
14 -1 15 2.7256 -0.0035
14 -1 16 1.6877 -0.0385
14 0 0 -2.5268 -0.0446
14 0 1 -5.0509 -0.2914
14 0 2 -6.8672 -0.0969
14 0 3 -1.3702 0.0428
14 0 4 4.8808 0.0068
14 0 5 2.2159 0.0046
14 0 6 -1.5105 0.0251
14 0 7 -2.1596 0.0215
14 0 8 -2.6522 0.0117
14 0 9 -1.2929 -0.0072
14 0 10 1.2365 0.0036
14 0 11 2.4154 0.0157
14 0 12 2.5140 -0.0259
14 0 13 1.4566 -0.0342
14 0 14 -0.9038 -0.0004
14 0 15 -3.2223 -0.0207
14 0 16 -3.3531 -0.0414
14 0 17 -1.1780 -0.0060
14 1 0 4.5219 -0.3876
14 1 1 1.1718 -0.1556
14 1 2 -1.5222 0.1197
14 1 3 3.0946 0.0836
14 1 4 3.3422 0.0212
14 1 5 -1.0134 0.0288
14 1 6 0.0524 0.0112
14 1 7 1.3471 0.0071
14 1 8 0.1681 -0.0003
14 1 9 0.5693 -0.0279
14 1 10 0.1945 -0.0173
14 1 11 -1.0046 -0.0127
14 1 12 -1.1256 -0.0282
14 1 13 -2.0961 0.0024
14 1 14 -3.2407 0.0217
14 1 15 -1.9994 -0.0049
14 1 16 1.2166 -0.0035
14 1 17 3.5510 0.0126
14 2 0 -4.9861 -0.1865
14 2 1 -8.3248 0.1880
14 2 2 -7.8365 0.1718
14 2 3 0.2526 0.0213
14 2 4 0.6157 0.0227
14 2 5 -0.4532 0.0165
14 2 6 3.8152 -0.0317
14 2 7 3.1425 -0.0382
14 2 8 -0.4050 -0.0354
14 2 9 -0.6501 -0.0098
14 2 10 -0.4806 0.0250
14 2 11 0.3256 -0.0061
14 2 12 1.6755 -0.0303
14 2 13 1.4555 0.0176
14 2 14 1.2181 0.0439
14 2 15 1.5885 0.0237
14 2 16 1.4798 0.0168
14 2 17 0.4402 0.0240
14 3 0 7.3981 0.2606
14 3 1 -3.5848 0.2832
14 3 2 -0.2873 0.0011
14 3 3 6.2248 -0.0768
14 3 4 2.6784 -0.0156
14 3 5 3.2297 -0.0367
14 3 6 3.2575 -0.0583
14 3 7 -5.8369 -0.0307
14 3 8 -8.0205 -0.0013
14 3 9 -1.2419 0.0192
14 3 10 1.6348 0.0047
14 3 11 1.3272 -0.0195
14 3 12 1.2030 0.0071
14 3 13 0.2297 0.0341
14 3 14 -0.2621 0.0083
14 3 15 0.4679 -0.0150
14 3 16 1.2036 -0.0082
14 3 17 0.5904 -0.0111
14 4 0 -0.5292 0.3188
14 4 1 -6.1194 -0.0306
14 4 2 1.7822 -0.1861
14 4 3 3.1871 -0.0520
14 4 4 -0.8081 -0.0000
14 4 5 1.3796 -0.0460
14 4 6 -1.4695 -0.0280
14 4 7 -5.3875 0.0228
14 4 8 0.8476 0.0420
14 4 9 3.2857 0.0251
14 4 10 -1.3573 0.0059
14 4 11 -0.5979 0.0193
14 4 12 1.4320 0.0296
14 4 13 -1.2588 0.0106
14 4 14 -2.8086 -0.0045
14 4 15 -1.4161 -0.0090
14 4 16 -0.7111 -0.0225
14 4 17 -1.1973 -0.0421
14 5 0 -5.1697 -0.0149
14 5 1 -4.8736 -0.2634
14 5 2 0.2150 -0.1067
14 5 3 -1.8402 0.0432
14 5 4 -3.4310 0.0165
14 5 5 -1.7184 0.0093
14 5 6 -4.3562 0.0331
14 5 7 -2.4188 0.0309
14 5 8 3.8273 0.0229
14 5 9 2.5898 0.0044
14 5 10 0.9186 -0.0037
14 5 11 2.9853 0.0021
14 5 12 1.0677 -0.0118
14 5 13 -0.4391 -0.0157
14 5 14 2.5980 -0.0010
14 5 15 2.9354 -0.0019
14 5 16 -0.4044 -0.0091
14 5 17 -1.9248 -0.0116
14 6 0 -2.9358 -0.3179
14 6 1 -3.3626 -0.1196
14 6 2 0.7287 0.1233
14 6 3 -1.4763 0.0683
14 6 4 -1.2949 0.0004
14 6 5 2.1729 0.0312
14 6 6 2.6356 0.0226
14 6 7 4.8193 0.0075
14 6 8 4.9560 0.0002
14 6 9 -0.2495 -0.0292
14 6 10 -1.6778 -0.0174
14 6 11 -0.0005 0.0037
14 6 12 -0.5279 -0.0193
14 6 13 -0.5728 -0.0233
14 6 14 -0.6598 -0.0031
14 6 15 -1.6372 -0.0002
14 6 16 -0.0739 -0.0102
14 6 17 2.3309 -0.0164
14 7 0 -2.9557 -0.1262
14 7 1 -0.2243 0.1930
14 7 2 2.9001 0.1368
14 7 3 -0.0584 -0.0077
14 7 4 1.7874 0.0281
14 7 5 2.9030 0.0226
14 7 6 0.5131 -0.0520
14 7 7 1.2585 -0.0369
14 7 8 -0.8088 -0.0096
14 7 9 -5.5345 -0.0174
14 7 10 -3.5635 0.0008
14 7 11 0.5742 -0.0019
14 7 12 0.5623 -0.0192
14 7 13 -0.1043 0.0001
14 7 14 0.3091 0.0039
14 7 15 0.2965 -0.0115
14 7 16 -0.9569 -0.0076
14 7 17 -2.9449 0.0043
14 8 0 -5.2612 0.2868
14 8 1 0.2848 0.2408
14 8 2 -2.5977 -0.0441
14 8 3 -5.6637 -0.0828
14 8 4 -2.0836 -0.0001
14 8 5 0.2526 -0.0355
14 8 6 1.6415 -0.0507
14 8 7 2.5922 0.0078
14 8 8 -1.0310 0.0070
14 8 9 -1.8189 -0.0184
14 8 10 2.8096 0.0001
14 8 11 3.2025 0.0135
14 8 12 0.2467 0.0177
14 8 13 0.5255 0.0211
14 8 14 1.4884 0.0160
14 8 15 0.3782 0.0208
14 8 16 -0.5126 0.0075
14 8 17 0.0340 -0.0127
14 9 0 3.7394 0.2760
14 9 1 3.1473 -0.0545
14 9 2 2.9638 -0.1603
14 9 3 4.4547 -0.0101
14 9 4 5.5661 0.0170
14 9 5 3.5754 -0.0678
14 9 6 2.0444 -0.0444
14 9 7 0.6261 0.0370
14 9 8 -2.0215 0.0357
14 9 9 -1.7282 0.0047
14 9 10 0.7714 0.0215
14 9 11 1.5174 0.0350
14 9 12 0.7800 0.0048
14 9 13 -1.0318 -0.0221
14 9 14 -2.7029 -0.0003
14 9 15 -2.1337 0.0210
14 9 16 -1.0905 -0.0036
14 10 0 -0.1194 -0.0283
14 10 1 3.0279 -0.2036
14 10 2 0.6734 -0.0489
14 10 3 -1.8438 0.0373
14 10 4 -2.3077 -0.0339
14 10 5 -2.4354 -0.0306
14 10 6 -0.8997 0.0624
14 10 7 0.1882 0.0879
14 10 8 -0.9779 0.0088
14 10 9 -0.4574 -0.0352
14 10 10 1.5491 0.0128
14 10 11 -0.1746 0.0265
14 10 12 -4.2465 -0.0230
14 10 13 -3.5495 -0.0298
14 10 14 1.6229 0.0009
14 10 15 3.0752 -0.0087
14 10 16 -0.2727 -0.0177
14 11 0 2.7243 -0.2177
14 11 1 -0.6878 -0.0772
14 11 2 -2.7617 0.0895
14 11 3 -2.1705 0.0248
14 11 4 -2.0978 -0.0049
14 11 5 -0.3105 0.0458
14 11 6 2.8188 0.0525
14 11 7 0.3913 0.0280
14 11 8 -4.9174 -0.0095
14 11 9 -3.5474 -0.0131
14 11 10 1.3744 0.0111
14 11 11 1.7106 -0.0290
14 11 12 1.0908 -0.0689
14 11 13 3.8796 -0.0151
14 11 14 3.9278 0.0311
14 11 15 -1.3063 -0.0047
14 12 2 4.0524 0.1320
14 12 3 -0.1762 -0.0470
14 12 4 -2.6414 0.0163
14 12 5 -0.0378 0.0426
14 12 6 1.4880 0.0064
14 12 7 -0.3453 0.0021
14 12 8 0.7832 -0.0539
14 12 9 5.2237 -0.0699
14 12 10 4.3400 0.0017
14 12 11 -1.8980 0.0221
14 12 12 -4.0424 0.0107
14 12 13 -1.6100 0.0279
14 13 4 -0.2562 0.0284
14 13 5 4.1546 -0.0677
14 13 6 2.1875 -0.0459
14 13 7 -2.8963 0.0407
14 13 8 -3.7625 -0.0158
14 13 9 0.0485 -0.0267
14 13 10 1.4900 0.0173
14 13 11 -0.5987 -0.0232
14 13 12 -0.7269 -0.0314
15 -7 3 -1.4625 0.0622
15 -7 4 -0.2580 0.0528
15 -7 5 0.0407 0.0327
15 -7 6 0.3482 0.0103
15 -7 7 -1.1440 0.0158
15 -6 0 1.3136 0.0025
15 -6 1 0.8439 0.1893
15 -6 2 2.1138 0.0614
15 -6 3 0.7202 0.0020
15 -6 4 -3.4826 -0.0022
15 -6 5 -2.7059 -0.0133
15 -6 6 1.4271 -0.0010
15 -6 7 -0.1018 0.0012
15 -6 8 -4.2022 0.0044
15 -6 9 -2.8248 0.0036
15 -5 0 2.7709 0.3430
15 -5 1 0.0379 0.1113
15 -5 2 -1.5746 -0.0716
15 -5 3 -3.6593 -0.0231
15 -5 4 -1.9777 0.0127
15 -5 5 3.3329 0.0113
15 -5 6 3.8340 -0.0396
15 -5 7 -0.9151 -0.0825
15 -5 8 -1.1094 -0.0132
15 -5 9 3.9762 0.0446
15 -5 10 5.5215 0.0341
15 -5 11 3.0151 0.0230
15 -4 0 -3.2886 0.2019
15 -4 1 -0.3393 -0.1625
15 -4 2 0.0098 -0.1617
15 -4 3 -0.2605 -0.0440
15 -4 4 1.6943 -0.0084
15 -4 5 3.7070 0.0125
15 -4 6 1.8013 -0.0121
15 -4 7 -1.7979 -0.0062
15 -4 8 -2.0550 0.0427
15 -4 9 -0.5398 0.0281
15 -4 10 -1.0276 0.0244
15 -4 11 -1.4529 0.0385
15 -4 12 0.0088 -0.0014
15 -3 0 5.3979 -0.2548
15 -3 1 5.3548 -0.2839
15 -3 2 3.0700 -0.0039
15 -3 3 -0.1791 0.0691
15 -3 4 -1.9337 0.0367
15 -3 5 -0.7659 0.0367
15 -3 6 0.0119 0.0112
15 -3 7 0.0063 0.0221
15 -3 8 1.2297 0.0375
15 -3 9 1.7983 0.0041
15 -3 10 0.9372 -0.0081
15 -3 11 1.1164 -0.0173
15 -3 12 0.9830 -0.0313
15 -3 13 -2.1918 -0.0143
15 -2 0 1.5109 -0.3395
15 -2 1 1.1112 0.0052
15 -2 2 -3.3402 0.1343
15 -2 3 -5.7322 0.0327
15 -2 4 -1.9418 0.0419
15 -2 5 3.2360 0.0625
15 -2 6 3.1633 0.0094
15 -2 7 0.7979 -0.0056
15 -2 8 -0.3991 -0.0054
15 -2 9 -1.1465 -0.0030
15 -2 10 -0.9613 0.0266
15 -2 11 -0.3631 0.0209
15 -2 12 -0.9677 -0.0262
15 -2 13 -0.7562 -0.0479
15 -2 14 2.8494 -0.0104
15 -1 0 1.3755 0.0558
15 -1 1 -1.8131 0.2988
15 -1 2 -1.1520 0.1109
15 -1 3 0.4858 -0.0261
15 -1 4 0.9835 0.0144
15 -1 5 0.4491 0.0098
15 -1 6 -0.9126 -0.0269
15 -1 7 -2.0473 -0.0416
15 -1 8 -2.9156 -0.0497
15 -1 9 -1.6115 -0.0160
15 -1 10 1.4306 0.0204
15 -1 11 1.5200 0.0040
15 -1 12 -1.0298 -0.0175
15 -1 13 -2.1170 -0.0009
15 -1 14 -1.4554 0.0257
15 -1 15 -1.8472 0.0048
15 0 0 6.9038 0.3614
15 0 1 6.6536 0.1512
15 0 2 5.7311 -0.1207
15 0 3 -1.7790 -0.0674
15 0 4 -4.4495 0.0173
15 0 5 0.2487 -0.0209
15 0 6 2.8276 -0.0481
15 0 7 1.5648 -0.0249
15 0 8 0.6911 0.0214
15 0 9 1.5405 0.0405
15 0 10 0.0519 0.0053
15 0 11 -3.7869 -0.0142
15 0 12 -3.2974 -0.0008
15 0 13 1.5781 0.0073
15 0 14 4.3817 0.0186
15 0 15 2.5934 0.0222
15 1 0 -9.2165 0.2276
15 1 1 1.3398 -0.1904
15 1 2 1.5905 -0.1919
15 1 3 -4.9339 -0.0124
15 1 4 -0.1541 0.0011
15 1 5 4.8018 -0.0135
15 1 6 1.7351 0.0203
15 1 7 -0.9903 0.0285
15 1 8 -0.5360 0.0213
15 1 9 0.0718 0.0131
15 1 10 -1.2281 0.0126
15 1 11 -1.6000 0.0112
15 1 12 1.7532 -0.0265
15 1 13 3.8912 -0.0407
15 1 14 1.5071 0.0001
15 1 15 -1.4814 0.0095
15 1 16 -1.6108 -0.0072
15 2 0 20.9143 -0.2430
15 2 1 17.6380 -0.2777
15 2 2 -0.4452 0.0017
15 2 3 -9.9012 0.0639
15 2 4 -4.0532 0.0044
15 2 5 -2.5696 0.0401
15 2 6 -4.8429 0.0550
15 2 7 -3.7778 0.0149
15 2 8 -1.3446 -0.0070
15 2 9 1.2854 -0.0189
15 2 10 2.0134 -0.0200
15 2 11 1.7647 -0.0127
15 2 12 2.3905 -0.0115
15 2 13 0.5001 0.0012
15 2 14 -2.7352 -0.0002
15 2 15 -2.5577 -0.0240
15 2 16 -0.3106 -0.0172
15 3 0 -7.5525 -0.3440
15 3 1 -0.5909 -0.0070
15 3 2 -8.2604 0.1559
15 3 3 -4.9242 0.0565
15 3 4 3.9463 0.0291
15 3 5 3.1036 0.0510
15 3 6 3.3427 0.0020
15 3 7 7.1076 -0.0376
15 3 8 6.6568 -0.0338
15 3 9 1.0456 -0.0216
15 3 10 -5.9008 -0.0100
15 3 11 -6.8989 -0.0099
15 3 12 -2.8017 -0.0060
15 3 13 -1.3003 0.0181
15 3 14 -1.0423 0.0345
15 3 15 0.5469 0.0341
15 3 16 0.2858 0.0213
15 4 0 12.8841 0.0529
15 4 1 8.0165 0.2857
15 4 2 -7.9121 0.1215
15 4 3 -3.1175 -0.0276
15 4 4 1.2831 0.0037
15 4 5 -1.6764 0.0207
15 4 6 0.7386 -0.0228
15 4 7 0.8421 -0.0497
15 4 8 -3.4045 -0.0308
15 4 9 -3.1229 0.0058
15 4 10 0.8384 0.0122
15 4 11 4.0213 0.0086
15 4 12 3.4437 0.0219
15 4 13 0.8508 0.0172
15 4 14 1.6293 0.0031
15 4 15 3.4166 0.0122
15 4 16 2.0444 0.0222
15 5 0 16.9457 0.2953
15 5 1 0.5586 0.1323
15 5 2 -3.4338 -0.0870
15 5 3 5.0481 -0.0697
15 5 4 2.1070 -0.0194
15 5 5 -0.2898 -0.0415
15 5 6 2.1316 -0.0445
15 5 7 -1.9123 -0.0073
15 5 8 -3.8301 0.0297
15 5 9 -0.8111 0.0152
15 5 10 -1.5194 -0.0134
15 5 11 -2.4449 0.0199
15 5 12 -0.5592 0.0355
15 5 13 0.4406 -0.0148
15 5 14 0.3384 -0.0311
15 5 15 -0.5252 -0.0146
15 5 16 -1.5901 -0.0225
15 6 0 7.8852 0.1611
15 6 1 -7.2556 -0.1657
15 6 2 -7.7502 -0.1631
15 6 3 -3.7500 -0.0170
15 6 4 -4.9836 -0.0008
15 6 5 -3.6191 -0.0094
15 6 6 -4.5034 0.0083
15 6 7 -5.5719 0.0097
15 6 8 0.9930 0.0145
15 6 9 3.7493 0.0120
15 6 10 -0.3231 0.0180
15 6 11 -0.5180 0.0287
15 6 12 0.6954 -0.0140
15 6 13 -0.0268 -0.0337
15 6 14 1.2663 0.0138
15 6 15 1.6757 0.0159
15 6 16 -1.1865 -0.0169
15 7 0 -5.9321 -0.2106
15 7 1 -5.3630 -0.2131
15 7 2 1.7715 0.0444
15 7 3 3.6451 0.0711
15 7 4 -1.3640 -0.0169
15 7 5 -1.9994 0.0295
15 7 6 0.7156 0.0692
15 7 7 5.5229 0.0340
15 7 8 8.5147 0.0063
15 7 9 3.8628 -0.0133
15 7 10 -0.0970 -0.0077
15 7 11 1.1090 0.0078
15 7 12 0.6513 -0.0095
15 7 13 -0.2470 -0.0028
15 7 14 0.6704 0.0166
15 7 15 -0.2009 0.0023
15 7 16 -0.3836 0.0124
15 8 0 12.8630 -0.3358
15 8 1 0.6408 -0.0122
15 8 2 1.4967 0.1555
15 8 3 -0.9249 0.0301
15 8 4 -4.1892 -0.0021
15 8 5 -2.0116 0.0541
15 8 6 0.0216 0.0028
15 8 7 1.8592 -0.0441
15 8 8 1.5480 -0.0159
15 8 9 -3.3020 -0.0069
15 8 10 -5.0601 -0.0171
15 8 11 -1.9821 -0.0321
15 8 12 0.1248 -0.0451
15 8 13 0.8756 -0.0216
15 8 14 0.8711 -0.0088
15 8 15 -0.2014 -0.0153
15 9 1 -6.6402 0.2469
15 9 2 -1.4439 0.1214
15 9 3 -3.9193 -0.0563
15 9 4 -2.3819 -0.0243
15 9 5 2.0041 0.0116
15 9 6 3.1761 -0.0445
15 9 7 2.9061 -0.0543
15 9 8 -0.0331 -0.0094
15 9 9 -2.9565 0.0089
15 9 10 -0.2157 0.0070
15 9 11 2.3389 0.0085
15 9 12 0.2499 0.0281
15 9 13 -0.4971 0.0462
15 9 14 1.4140 0.0184
15 10 2 2.6745 -0.0720
15 10 3 0.8698 -0.0824
15 10 4 -0.7130 -0.0059
15 10 5 -1.6380 -0.0029
15 10 6 0.5113 -0.0291
15 10 7 4.1641 0.0141
15 10 8 3.9307 0.0688
15 10 9 1.3654 0.0349
15 10 10 -0.0556 -0.0185
15 10 11 -0.9190 -0.0039
15 10 12 -0.1671 0.0223
15 10 13 1.6090 -0.0032
15 10 14 0.5492 -0.0276
15 11 4 2.2434 0.0051
15 11 5 4.3768 0.0077
15 11 6 2.3965 0.0063
15 11 7 -1.8913 0.0298
15 11 8 -4.7295 0.0400
15 11 9 -4.3350 -0.0164
15 11 10 -1.1355 -0.0292
15 11 11 1.7382 0.0215
15 11 12 1.2277 0.0225
15 12 7 2.5024 0.0314
15 12 8 3.5430 0.0582
15 12 9 0.0157 0.0120
16 -4 2 1.2184 0.0101
16 -4 3 -1.3752 -0.0393
16 -4 4 -5.3876 -0.0303
16 -4 5 -4.0789 -0.0054
16 -4 6 2.1205 0.0073
16 -4 7 3.9501 -0.0286
16 -4 8 1.2952 -0.0113
16 -4 9 1.7645 0.0242
16 -3 1 -2.0343 0.0595
16 -3 2 -0.7761 -0.1156
16 -3 3 -1.1105 -0.0793
16 -3 4 0.3410 -0.0457
16 -3 5 3.3261 -0.0138
16 -3 6 3.1088 -0.0087
16 -3 7 -1.0898 -0.0105
16 -3 8 -3.1957 0.0106
16 -3 9 -0.7921 -0.0202
16 -3 10 1.1557 -0.0159
16 -2 0 2.6433 -0.0383
16 -2 1 5.3732 -0.2660
16 -2 2 4.5877 -0.1143
16 -2 3 3.1960 0.0047
16 -2 4 -0.1217 -0.0170
16 -2 5 -2.8752 -0.0051
16 -2 6 -2.1655 0.0362
16 -2 7 0.3311 0.0678
16 -2 8 1.5620 0.0429
16 -2 9 0.2480 -0.0242
16 -2 10 -1.8207 -0.0155
16 -2 11 -2.0103 0.0206
16 -2 12 -0.1245 0.0017
16 -1 0 0.4172 -0.3069
16 -1 1 1.1925 -0.1473
16 -1 2 0.7236 0.0731
16 -1 3 -0.1065 0.0514
16 -1 4 -1.6941 0.0158
16 -1 5 -0.8155 0.0523
16 -1 6 1.1194 0.0678
16 -1 7 2.0979 0.0534
16 -1 8 2.0061 0.0050
16 -1 9 1.0277 -0.0325
16 -1 10 1.0001 -0.0159
16 -1 11 1.9462 -0.0078
16 -1 12 1.9896 -0.0309
16 0 0 -4.2616 -0.1796
16 0 1 -3.3855 0.1514
16 0 2 -2.6019 0.1635
16 0 3 -0.4488 0.0151
16 0 4 -0.2388 -0.0128
16 0 5 -0.9434 0.0251
16 0 6 -0.1279 0.0430
16 0 7 1.9473 0.0054
16 0 8 0.4368 -0.0642
16 0 9 -2.6439 -0.0656
16 0 10 -0.6676 -0.0110
16 0 11 2.0174 0.0156
16 0 12 -0.4670 0.0063
16 0 13 -4.2194 -0.0056
16 1 0 6.4323 0.1668
16 1 1 -5.2762 0.2681
16 1 2 -1.1496 0.0439
16 1 3 3.5927 -0.0563
16 1 4 -1.5221 -0.0150
16 1 5 -5.0326 -0.0089
16 1 6 -1.5294 -0.0358
16 1 7 1.0669 -0.0518
16 1 8 -1.8562 -0.0308
16 1 9 -1.6509 0.0005
16 1 10 3.1984 -0.0006
16 1 11 2.1037 0.0133
16 1 12 -2.8260 0.0429
16 1 13 -1.9149 0.0368
16 1 14 2.5711 0.0242
16 2 0 -25.8881 0.3279
16 2 1 -9.8222 0.0220
16 2 2 13.3886 -0.1585
16 2 3 13.4081 -0.0584
16 2 4 4.5792 -0.0108
16 2 5 4.3286 -0.0478
16 2 6 6.3137 -0.0282
16 2 7 3.3908 0.0192
16 2 8 -1.2527 0.0285
16 2 9 -1.1587 0.0065
16 2 10 -0.5738 0.0064
16 2 11 -4.4137 0.0243
16 2 12 -4.6571 -0.0092
16 2 13 0.6971 -0.0419
16 2 14 2.6802 0.0004
16 3 0 5.5755 0.0101
16 3 1 16.0727 -0.2338
16 3 2 15.5272 -0.1032
16 3 3 -0.4930 0.0166
16 3 4 -8.4622 -0.0325
16 3 5 -7.0299 -0.0185
16 3 6 -5.2286 0.0656
16 3 7 -5.1707 0.0691
16 3 8 -4.3525 0.0101
16 3 9 2.0775 -0.0099
16 3 10 7.9766 0.0151
16 3 11 6.5733 0.0113
16 3 12 3.8437 -0.0234
16 3 13 1.9437 -0.0225
16 3 14 -1.3301 -0.0090
16 4 0 -5.2484 -0.3322
16 4 1 4.5344 -0.1838
16 4 2 5.8545 0.0720
16 4 3 -2.2206 0.0697
16 4 4 -2.4757 -0.0064
16 4 5 -0.0464 0.0094
16 4 6 0.7496 0.0293
16 4 8 0.7075 -0.0095
16 4 9 2.8858 0.0004
16 4 10 -0.5892 -0.0146
16 4 11 -6.8974 -0.0518
16 4 12 -5.4443 -0.0346
16 4 13 -1.4215 0.0172
16 4 14 -1.5231 0.0252
16 5 0 -11.2768 -0.1938
16 5 1 6.2549 0.1305
16 5 2 -0.0522 0.1569
16 5 3 -5.3034 0.0216
16 5 4 -0.4997 -0.0085
16 5 5 0.4877 0.0232
16 5 7 0.8012 -0.0306
16 5 8 1.1774 -0.0403
16 5 9 2.2792 -0.0017
16 5 10 1.1275 -0.0061
16 5 11 -0.2902 -0.0212
16 5 12 0.0445 0.0267
16 5 13 -1.6699 0.0528
16 5 14 -2.2228 0.0318
16 6 1 14.5055 0.2654
16 6 2 13.3752 0.0809
16 6 3 13.7760 -0.0233
16 6 4 6.8953 -0.0238
16 6 5 -1.6773 -0.0224
16 6 6 0.0310 -0.0205
16 6 7 0.1620 -0.0111
16 6 8 -2.8175 0.0236
16 6 9 -0.6291 0.0207
16 6 10 0.8788 -0.0404
16 6 11 -0.6469 -0.0099
16 6 12 -0.6888 0.0691
16 6 13 -0.1201 0.0267
16 6 14 0.5272 -0.0297
16 7 2 -5.6232 -0.1462
16 7 3 -13.3489 -0.0791
16 7 4 -17.0386 -0.0298
16 7 5 -10.0847 -0.0523
16 7 6 -3.4723 -0.0508
16 7 7 -6.8778 -0.0051
16 7 8 -4.3612 0.0499
16 7 9 3.5574 0.0275
16 7 10 1.6320 -0.0196
16 7 11 -2.6934 0.0166
16 7 12 -0.7067 0.0174
16 7 13 0.8376 -0.0424
16 8 3 4.3220 0.0104
16 8 4 6.9289 -0.0126
16 8 5 9.4988 -0.0376
16 8 6 4.4421 0.0023
16 8 7 -1.3632 0.0269
16 8 8 2.7083 0.0193
16 8 9 4.7328 -0.0015
16 8 10 -0.3245 0.0187
16 8 11 -0.7918 0.0554
16 8 12 1.2063 0.0122
16 8 13 -0.9075 -0.0273
16 9 5 -9.7229 -0.0300
16 9 6 -7.6022 0.0289
16 9 7 0.3328 0.0717
16 9 8 9.3205 0.0585
16 9 9 6.3214 -0.0136
16 9 10 -2.5135 -0.0675
16 9 11 -3.5821 -0.0515
16 10 8 -7.6347 -0.0192
17 0 5 1.7846 0.0279
17 0 6 -2.7949 0.0022
17 0 7 -3.7842 0.0484
17 0 8 -1.0571 0.0814
17 0 9 0.1535 0.0387
17 1 4 -1.7553 0.0817
17 1 5 0.7116 0.0258
17 1 6 -0.1150 0.0269
17 1 7 0.8623 0.0566
17 1 8 3.5153 0.0140
17 1 9 1.0808 -0.0256
17 1 10 -1.2660 -0.0217
17 2 4 1.0197 -0.0155
17 2 5 -0.7140 -0.0260
17 2 6 -3.8468 -0.0196
17 2 7 0.7529 -0.0325
17 2 8 3.2080 -0.0253
17 2 9 -1.2384 0.0115
17 2 10 -0.6186 -0.0256
17 3 6 2.1238 -0.0774
17 3 7 1.9811 -0.0635
17 3 8 -1.3928 0.0120
17 3 9 -5.4177 0.0280
17 3 10 -3.5408 -0.0264
17 3 11 -1.6088 -0.0172
17 4 5 5.0513 -0.0107
17 4 6 -0.1131 -0.0221
17 4 8 0.0300 0.0171
17 4 9 -2.2309 -0.0135
17 4 10 1.8090 -0.0111
17 4 11 5.9770 0.0197
17 5 5 -3.7830 -0.0276
17 5 8 -1.1492 0.0257
17 5 9 -2.4461 0.0285
17 5 10 1.9090 0.0169
17 6 6 -0.9095 -0.0471
17 6 8 -2.4780 -0.0129
17 6 9 -2.0853 0.0390
0 0 0 0.0 0.0
;
loop_
  _diffrn_refln_index_h
  _diffrn_refln_index_k
  _diffrn_refln_index_l
  _diffrn_refln_intensity_net
  _diffrn_refln_intensity_u
 -1 0 0 0 1.3
 -2 0 0 220.78 10.9
 2 0 0 248.98 10.1
 2 0 0 239.48 15.7
 -3 0 0 79.69 9.4
 -3 0 0 108.89 19.8
 3 0 0 82.19 13.2
 3 0 0 107.99 10.2
 -4 0 0 18.5 14.4
 -4 0 0 53.39 8.6
 4 0 0 30.8 12.4
 4 0 0 47.8 8.5
 -5 0 0 -21.7 17
 -5 0 0 -9.8 8
 5 0 0 11.2 11.8
 5 0 0 8.8 8.2
 -6 0 0 205.48 35.4
 -6 0 0 200.28 17.2
 6 0 0 219.58 26.5
 6 0 0 231.08 16.6
 -7 0 0 83.99 12.6
 -7 0 0 55.09 25.2
 7 0 0 30.8 17.8
 7 0 0 101.99 13.6
 -8 0 0 47.4 26.1
 -8 0 0 86.89 13.4
 8 0 0 61.09 13.3
 8 0 0 53.69 18.1
 -9 0 0 -0.7 10.8
 -9 0 0 -16.8 22.9
 9 0 0 -16.8 15.1
 9 0 0 -0.2 11
 -10 0 0 162.98 39.6
 -10 0 0 178.08 19.6
 10 0 0 157.78 30.3
 10 0 0 149.99 19.2
 -11 0 0 23.6 14.5
 -11 0 0 -10 34
 11 0 0 1.9 19.3
 11 0 0 -5.9 13.3
 -12 0 0 -8.7 36.4
 12 0 0 7.3 21.8
 12 0 0 13.8 15
 -13 0 0 127.09 48.5
 13 0 0 69.99 18
 13 0 0 88.69 29.5
 -14 0 0 73.89 49
 14 0 0 -5.5 15.1
 14 0 0 -0.2 24.3
 -15 0 0 202.18 62.79
 15 0 0 51.99 30.4
 15 0 0 30.5 18.9
 -16 0 0 311.87 75.59
 -17 0 0 145.29 46.4
 17 0 0 43.8 32.8
 -18 0 0 178.48 53.39
 18 0 0 60.29 36.6
 18 -1 0 35.7 35.3
 -18 1 0 130.79 51.79
 17 -1 0 23.7 32.8
 -17 1 0 133.99 49.4
 16 -1 0 20.2 29.2
 -16 1 0 95.79 45.3
 15 -1 0 47.3 30.3
 15 -1 0 43.6 19.8
 -15 1 0 101.59 41.8
 14 -1 0 131.89 22.8
 14 -1 0 156.38 35
 -14 1 0 234.28 60.39
 13 -1 0 44.2 18
 13 -1 0 21.3 25
 -13 1 0 41.4 42.4
 12 -1 0 10.4 23.8
 12 -1 0 -8.1 14.4
 -12 1 0 -5.7 37.4
 11 -1 0 333.17 27.7
 11 -1 0 291.07 40.5
 -11 1 0 241.68 51.99
 10 -1 0 167.18 20.4
 10 -1 0 137.69 27.5
 -10 1 0 157.28 42.1
 9 -1 0 48.4 14.1
 9 -1 0 26 18.5
 -9 1 0 9.6 28.7
 8 -1 0 85.79 14.1
 8 -1 0 86.69 21.4
 -8 1 0 58.19 28.6
 -8 1 0 93.99 12.9
 7 -1 0 151.58 16.1
 7 -1 0 106.99 21.7
 -7 1 0 110.59 31.5
 6 -1 0 1.2 13.3
 6 -1 0 -2.4 9
 -6 1 0 2.6 8.7
 -6 1 0 -1.2 21.6
 5 -1 0 0.5 8
 5 -1 0 -8.2 11.3
 -5 1 0 -9.5 19.2
 4 -1 0 187.98 13.6
 4 -1 0 204.28 21.6
 -4 1 0 191.48 28
 3 -1 0 216.98 19.7
 3 -1 0 234.48 12.7
 -3 1 0 209.58 28.6
 2 -1 0 55.29 6.7
 -2 1 0 46.1 12.7
 1 -1 0 1078.09 32.3
 -1 1 0 1095.09 53.49
 0 -1 0 -8.4 0.4
 0 -1 0 -8.2 0.9
 0 1 0 -8 0.2
 0 1 0 -11 1.7
 0 1 0 -8.6 1.1
 -1 -1 0 423.06 19.1
 -1 -1 0 465.05 13.7
 1 1 0 429.06 22.9
 1 1 0 470.35 13.6
 1 1 0 380.76 16.8
 1 1 0 423.76 18.4
 2 1 0 1287.07 53.49
 2 1 0 1258.27 46.8
 2 1 0 1383.66 39
 2 1 0 1380.96 65.59
 3 1 0 111.79 15.5
 3 1 0 81.99 12.6
 3 1 0 107.39 10.8
 3 1 0 105.19 9.1
 -4 -1 0 116.79 12.2
 4 1 0 106.59 15.6
 4 1 0 100.59 10.8
 4 1 0 118.69 18.7
 -5 -1 0 45.6 10.6
 5 1 0 39.4 8.9
 5 1 0 42.5 16.4
 5 1 0 46.9 14.3
 -6 -1 0 63.99 12.9
 6 1 0 91.69 21.3
 6 1 0 60.59 16.1
 6 1 0 81.19 11.3
 -7 -1 0 486.55 26.5
 -7 -1 0 474.95 47.8
 7 1 0 504.45 24.1
 7 1 0 491.45 36.4
 -8 -1 0 363.46 24.1
 -8 -1 0 313.57 42.7
 8 1 0 401.36 22.5
 8 1 0 350.26 35.3
 -9 -1 0 318.27 23.3
 -9 -1 0 211.18 38.3
 9 1 0 288.97 21.6
 9 1 0 310.37 35.9
 -10 -1 0 254.37 44.1
 -10 -1 0 324.37 25.8
 10 1 0 279.37 22.8
 10 1 0 267.87 35.3
 -11 -1 0 41.7 35.8
 -11 -1 0 109.29 19.4
 11 1 0 72.99 16.1
 11 1 0 61.59 24.8
 -12 -1 0 78.09 19.9
 -12 -1 0 23.8 37.5
 12 1 0 58.39 26.1
 12 1 0 48.3 16.6
 -13 -1 0 232.38 56.49
 13 1 0 183.88 22.7
 13 1 0 187.18 36.5
 -14 -1 0 284.87 61.69
 14 1 0 178.18 24.5
 14 1 0 167.58 37.2
 -15 -1 0 180.68 58.79
 15 1 0 2.7 22
 15 1 0 23.5 26.6
 -16 -1 0 294.17 73.59
 -17 -1 0 548.25 95.29
 -18 -1 0 156.58 46.5
 18 1 0 18 32.2
 17 -2 0 64.49 35.6
 -17 2 0 78.29 49
 16 -2 0 38.5 32.2
 16 -2 0 27.5 24.5
 -16 2 0 68.39 44.5
 15 -2 0 15.5 26.6
 15 -2 0 45.8 21
 -15 2 0 89.79 45.5
 14 -2 0 -8.9 16.9
 14 -2 0 18.8 26.8
 -14 2 0 24.4 39.1
 13 -2 0 120.09 34.1
 13 -2 0 136.69 22.9
 -13 2 0 110.39 43.1
 12 -2 0 19.2 23.4
 12 -2 0 43.5 17.2
 -12 2 0 17.9 34.9
 11 -2 0 48.7 23.9
 11 -2 0 27.9 16.9
 -11 2 0 19.4 37.4
 10 -2 0 364.96 43.1
 10 -2 0 341.67 27.1
 -10 2 0 286.97 52.59
 9 -2 0 -6.7 12.3
 9 -2 0 -16.6 15.8
 -9 2 0 -31.3 28.1
 8 -2 0 -14.8 10.5
 8 -2 0 -5.6 15.9
 -8 2 0 7.2 26.6
 7 -2 0 251.57 31.6
 7 -2 0 289.97 21
 -7 2 0 261.77 41
 6 -2 0 224.48 27.4
 6 -2 0 224.18 18.3
 -6 2 0 212.58 37.5
 5 -2 0 88.69 12.5
 5 -2 0 80.49 17.4
 -5 2 0 74.09 26
 4 -2 0 1.9 10.9
 4 -2 0 11.3 8.9
 -4 2 0 -23.9 18.3
 3 -2 0 256.97 21.2
 3 -2 0 284.57 15.7
 -3 2 0 289.37 31.6
 2 -2 0 56.59 8.5
 2 -2 0 37.8 9.4
 -2 2 0 2.8 18.3
 1 -2 0 2658.93 96.09
 1 -2 0 2375.86 73.29
 -1 2 0 2570.74 84.59
 -1 2 0 2510.95 120.79
 0 -2 0 5418.66 155.68
 0 2 0 5660.63 182.18
 0 2 0 5461.65 254.37
 -1 -2 0 17.2 3.7
 -1 -2 0 26.1 4.7
 1 2 0 21.3 4
 1 2 0 27.9 6.9
 1 2 0 30.2 7.9
 2 2 0 681.93 21.8
 2 2 0 676.13 37.3
 2 2 0 662.33 28
 2 2 0 634.64 29.5
 3 2 0 1351.76 71.59
 3 2 0 1408.16 58.19
 3 2 0 1398.46 42.1
 3 2 0 1402.26 51.79
 4 2 0 -4.6 8.6
 4 2 0 -6.7 10.4
 4 2 0 6 9.9
 4 2 0 7 5.8
 5 2 0 294.97 29.5
 5 2 0 296.57 16
 5 2 0 297.97 25.7
 -6 -2 0 156.78 17.2
 6 2 0 112.09 20
 6 2 0 160.28 25.9
 6 2 0 142.49 13.3
 -7 -2 0 328.57 24.1
 7 2 0 322.97 30.9
 7 2 0 367.76 19.8
 7 2 0 360.76 38.6
 -8 -2 0 197.48 21.3
 8 2 0 186.38 17.1
 8 2 0 177.68 31.1
 8 2 0 183.68 24.9
 -9 -2 0 145.59 34.1
 -9 -2 0 178.18 21.5
 9 2 0 164.08 26.6
 9 2 0 191.78 18.9
 -10 -2 0 -8.2 26.2
 -10 -2 0 26.8 15.8
 10 2 0 4 19.8
 10 2 0 0 12.6
 -11 -2 0 -17.8 31.7
 -11 -2 0 1.7 15.9
 11 2 0 7.6 13
 11 2 0 13.4 20.4
 -12 -2 0 45.7 18.7
 -12 -2 0 -7.1 32.7
 12 2 0 -0.3 14.5
 12 2 0 8.7 22.5
 -13 -2 0 47.7 23.9
 -13 -2 0 48.3 41.1
 13 2 0 -3.3 14.5
 13 2 0 6.8 23.2
 -14 -2 0 332.17 65.99
 14 2 0 217.08 26.8
 14 2 0 178.08 37.6
 -15 -2 0 201.58 60.59
 -16 -2 0 381.76 75.59
 -17 -2 0 524.25 92.09
 17 -3 0 31.7 34.4
 -17 3 0 109.79 53.69
 16 -3 0 31.7 31
 16 -3 0 -1 20.5
 -16 3 0 49.1 46.9
 15 -3 0 -12.2 18.5
 15 -3 0 43.8 29.7
 -15 3 0 66.79 44.7
 14 -3 0 84.89 22.7
 14 -3 0 104.39 34.5
 -14 3 0 98.89 46.8
 13 -3 0 126.19 23.7
 13 -3 0 96.69 31.4
 -13 3 0 131.69 47.9
 12 -3 0 89.09 21.8
 12 -3 0 137.99 33.8
 -12 3 0 121.39 46.3
 11 -3 0 105.19 21.3
 11 -3 0 64.69 27.4
 -11 3 0 100.69 45.2
 10 -3 0 -8.7 20.5
 10 -3 0 14.3 15.3
 -10 3 0 -14.9 35.8
 9 -3 0 52.99 15.7
 9 -3 0 33.6 20.8
 -9 3 0 24.1 35.2
 8 -3 0 99.69 16.7
 8 -3 0 72.69 21.8
 -8 3 0 99.79 37.9
 7 -3 0 317.37 21.9
 7 -3 0 299.97 33.1
 -7 3 0 320.47 53.79
 6 -3 0 951.8 53.49
 6 -3 0 968.9 38.6
 -6 3 0 979.4 75.89
 5 -3 0 318.37 30.3
 5 -3 0 379.36 21.8
 -5 3 0 331.77 48.9
 4 -3 0 82.29 12.7
 4 -3 0 81.19 15.2
 -4 3 0 35.5 26.1
 3 -3 0 3.6 8.2
 3 -3 0 26.2 11
 -3 3 0 -5.4 20.2
 2 -3 0 982.4 47
 2 -3 0 1082.79 36.8
 -2 3 0 1067.09 39.5
 -2 3 0 1212.98 65.29
 1 -3 0 3210.58 88.49
 1 -3 0 2594.94 114.29
 -1 3 0 3178.98 145.59
 -1 3 0 3107.49 102.59
 0 -3 0 423.26 18.1
 0 3 0 494.75 22.4
 0 3 0 483.85 33.8
 -1 -3 0 24.4 6.2
 1 3 0 12.7 9.2
 1 3 0 21.9 10.5
 -2 -3 0 313.27 14.4
 2 3 0 258.97 19.1
 2 3 0 300.57 24.1
 2 3 0 266.67 16.5
 3 3 0 112.59 15
 3 3 0 141.99 10.9
 3 3 0 145.09 15.4
 3 3 0 130.59 18.5
 4 3 0 344.17 29.8
 4 3 0 344.47 15.4
 4 3 0 325.57 21.8
 4 3 0 319.37 24.4
 5 3 0 0.2 11
 5 3 0 2.6 10.7
 5 3 0 0.9 12.9
 5 3 0 4 6.8
 -6 -3 0 96.89 16.4
 6 3 0 65.09 16.8
 6 3 0 75.79 11
 6 3 0 90.09 22
 -7 -3 0 410.66 28.1
 7 3 0 461.05 43.1
 7 3 0 477.25 36.5
 7 3 0 469.25 22.8
 -8 -3 0 -4.1 12.5
 8 3 0 5.8 15.2
 8 3 0 -8.6 17.4
 8 3 0 9.5 9.4
 -9 -3 0 64.79 17.1
 9 3 0 44.4 19.5
 9 3 0 36 23.7
 9 3 0 61.99 13.1
 -10 -3 0 318.57 29.4
 10 3 0 308.27 24.8
 10 3 0 306.77 48.9
 10 3 0 324.97 41.1
 -11 -3 0 20.5 18
 -11 -3 0 -18.1 30.2
 11 3 0 9.1 21.8
 11 3 0 17.1 14.2
 -12 -3 0 7 18.6
 -12 -3 0 14.3 35.7
 12 3 0 -11.9 13.3
 12 3 0 -3.7 21.9
 -13 -3 0 421.16 36.2
 -13 -3 0 388.36 67.79
 13 3 0 390.26 31.5
 13 3 0 367.46 49.9
 -14 -3 0 291.07 62.49
 14 3 0 149.79 24.2
 14 3 0 150.38 36.8
 15 3 0 20 28.3
 -16 -3 0 569.64 86.69
 -17 -3 0 541.95 89.79
 17 -4 0 8.3 34
 -17 4 0 81.89 55.59
 16 -4 0 23.6 22.7
 16 -4 0 8.9 31.5
 -16 4 0 84.59 53.59
 15 -4 0 -19.5 19.3
 15 -4 0 6.3 27.1
 -15 4 0 42.4 48.5
 14 -4 0 43.6 30.3
 14 -4 0 -8.6 19.7
 -14 4 0 22.5 45.4
 13 -4 0 94.69 31.9
 13 -4 0 55.59 22.4
 -13 4 0 52.69 45.6
 12 -4 0 -19.9 16.5
 12 -4 0 -7.1 22.9
 -12 4 0 28.1 42.5
 11 -4 0 61.89 27.7
 11 -4 0 89.69 21.2
 -11 4 0 40.1 43.4
 10 -4 0 360.46 30.6
 10 -4 0 291.57 39.1
 -10 4 0 321.57 57.99
 9 -4 0 35.3 16.5
 9 -4 0 12.7 20.4
 -9 4 0 -4.6 36.9
 8 -4 0 -10.9 13.7
 8 -4 0 5.7 17.3
 -8 4 0 19.1 35.5
 7 -4 0 1151.88 45.8
 7 -4 0 1155.28 62.79
 -7 4 0 1114.19 87.39
 6 -4 0 25.3 16.3
 6 -4 0 16.1 12.7
 -6 4 0 19.1 30.9
 5 -4 0 36.4 12.4
 5 -4 0 13.5 14.5
 -5 4 0 32.8 29.6
 4 -4 0 1149.69 56.89
 4 -4 0 1277.17 43.2
 -4 4 0 1111.39 78.39
 3 -4 0 516.25 23.8
 3 -4 0 454.95 30.2
 -3 4 0 510.95 50.09
 2 -4 0 252.37 20.4
 2 -4 0 275.47 17
 -2 4 0 251.27 16.8
 -2 4 0 260.87 37.6
 1 -4 0 2622.24 104.29
 1 -4 0 2897.61 81.99
 -1 4 0 2677.43 94.59
 -1 4 0 2690.83 133.49
 0 -4 0 1483.65 47
 0 4 0 1444.56 55.29
 0 4 0 1440.16 76.99
 -1 -4 0 3198.98 100.59
 1 4 0 3631.34 120.49
 1 4 0 3567.74 165.58
 -2 -4 0 91.59 10.3
 2 4 0 96.89 14.2
 2 4 0 87.29 15.8
 2 4 0 78.09 8.9
 -3 -4 0 30.7 8.1
 3 4 0 22.1 8.7
 3 4 0 19.1 12.5
 3 4 0 33.9 13.5
 -4 -4 0 46.7 8.7
 4 4 0 47 16.3
 4 4 0 48.8 12.2
 4 4 0 59.89 14.3
 5 4 0 23.1 7.5
 5 4 0 8.2 11.3
 5 4 0 5.8 13.2
 5 4 0 6.7 12.4
 6 4 0 385.36 38.7
 6 4 0 392.86 19.3
 6 4 0 385.56 30.8
 -7 -4 0 64.39 16.9
 7 4 0 39.1 21
 7 4 0 61.39 17.8
 7 4 0 70.29 11.4
 -8 -4 0 131.09 20.9
 8 4 0 124.19 22.2
 8 4 0 102.49 26.9
 8 4 0 137.89 14.6
 -9 -4 0 151.38 22.8
 9 4 0 128.99 24.9
 9 4 0 142.99 31.8
 9 4 0 150.08 16.6
 -10 -4 0 97.19 22.2
 10 4 0 76.09 30.2
 10 4 0 108.39 25.7
 10 4 0 94.39 16.1
 -11 -4 0 27.7 19.9
 11 4 0 47.7 16.2
 11 4 0 49.6 23.8
 11 4 0 33.7 27.9
 -12 -4 0 15.3 21.1
 -12 -4 0 3.5 35.4
 12 4 0 -6.8 21.4
 12 4 0 -4 14.5
 -13 -4 0 128.69 45.5
 13 4 0 77.09 19
 13 4 0 75.49 29.2
 -14 -4 0 145.39 55.29
 -14 -4 0 112.59 26.4
 14 4 0 100.99 31.7
 -15 -4 0 158.68 58.69
 15 4 0 -1.2 27.8
 -16 -4 0 285.17 72.19
 -17 -4 0 447.56 88.49
 17 -5 0 26.3 35.6
 -17 5 0 37.9 56.49
 16 -5 0 44.2 35.1
 16 -5 0 36.5 25.9
 -16 5 0 7.4 52.39
 15 -5 0 154.88 29.6
 -15 5 0 137.69 57.49
 14 -5 0 76.79 33.4
 14 -5 0 103.79 27.1
 -14 5 0 140.69 55.29
 13 -5 0 -25.3 18.3
 13 -5 0 6.8 25.4
 -13 5 0 -10.3 46.2
 12 -5 0 2.6 18.7
 12 -5 0 14.1 25
 -12 5 0 -20 45
 11 -5 0 36.7 18.5
 11 -5 0 6.9 23.5
 -11 5 0 0.1 45.2
 10 -5 0 148.29 23.5
 10 -5 0 122.39 31.2
 -10 5 0 109.99 50.49
 9 -5 0 -4.3 20.4
 9 -5 0 20.3 16.3
 -9 5 0 32.9 42.8
 8 -5 0 32 20.7
 8 -5 0 26.4 15.5
 -8 5 0 75.59 38.9
 7 -5 0 54.39 20.9
 7 -5 0 87.79 17.4
 -7 5 0 75.39 39.2
 6 -5 0 133.69 23.7
 6 -5 0 185.28 19.8
 -6 5 0 174.78 41.1
 5 -5 0 84.99 15.3
 5 -5 0 42.5 16.7
 -5 5 0 88.39 35.9
 4 -5 0 55.99 12.7
 4 -5 0 30.3 14.3
 -4 5 0 41.6 30.2
 3 -5 0 406.76 22.5
 3 -5 0 346.87 27.6
 -3 5 0 317.87 20.5
 2 -5 0 3.1 10
 2 -5 0 2.7 9.6
 -2 5 0 -1.3 10.3
 -2 5 0 11.4 22.2
 1 -5 0 784.12 37.3
 1 -5 0 912.21 32.1
 -1 5 0 879.81 37.3
 -1 5 0 824.92 56.19
 0 -5 0 8.5 8
 0 5 0 10.4 15.1
 0 5 0 -6.6 10.6
 -1 -5 0 14.6 8.9
 1 5 0 7.2 11.5
 1 5 0 12.5 13.9
 -2 -5 0 136.19 14.4
 2 5 0 204.18 20.9
 2 5 0 200.48 24.9
 -3 -5 0 581.84 25.9
 3 5 0 624.44 29.8
 3 5 0 604.74 42.7
 3 5 0 615.04 33.4
 -4 -5 0 101.59 11.6
 4 5 0 77.69 19
 4 5 0 57.19 12.7
 4 5 0 88.09 17.2
 -5 -5 0 260.87 17.6
 5 5 0 283.17 34.9
 5 5 0 289.07 26
 5 5 0 266.17 25.8
 6 5 0 862.71 42.6
 6 5 0 841.52 32
 6 5 0 869.41 59.99
 6 5 0 865.61 46.4
 7 5 0 696.93 42.8
 7 5 0 699.63 28.2
 7 5 0 627.04 53.59
 -8 -5 0 107.09 20.5
 8 5 0 84.29 13.5
 8 5 0 78.29 20
 8 5 0 91.19 27.3
 -9 -5 0 189.58 25.7
 9 5 0 206.88 37.7
 9 5 0 193.18 18.3
 9 5 0 146.59 27.3
 -10 -5 0 32.5 20.1
 10 5 0 62.49 14.7
 10 5 0 54.39 27.8
 10 5 0 32.4 21.5
 -11 -5 0 118.49 26
 11 5 0 82.89 27
 11 5 0 107.49 18.9
 11 5 0 82.59 34.9
 -12 -5 0 39.2 22.6
 12 5 0 11.2 14.9
 12 5 0 13.8 28.7
 12 5 0 10 23.3
 -13 -5 0 106.39 49
 -13 -5 0 81.19 25.8
 13 5 0 72.79 29.7
 13 5 0 85.09 20.2
 -14 -5 0 45.9 51.59
 -14 -5 0 97.89 26.5
 14 5 0 33.5 28.8
 -15 -5 0 103.09 59.09
 15 5 0 -6.6 26.6
 -16 -5 0 226.78 74.39
 16 5 0 93.29 37
 17 5 0 34 33
 -18 -5 0 513.95 97.39
 17 -6 0 26.4 37.5
 17 -6 0 59.29 33.6
 -17 6 0 16.3 59.79
 16 -6 0 -14.9 24.2
 16 -6 0 28.9 34.9
 -16 6 0 -6.4 57.99
 15 -6 0 17.4 30.3
 15 -6 0 15.2 23.9
 -15 6 0 23.9 53.49
 14 -6 0 25.1 30.4
 14 -6 0 25.9 23.6
 -14 6 0 16.8 51.79
 13 -6 0 22.6 22.3
 13 -6 0 -9.7 25.7
 -13 6 0 29.9 50.99
 12 -6 0 14.1 20.8
 12 -6 0 42.1 27.5
 -12 6 0 37.1 50.29
 11 -6 0 37.6 20.8
 11 -6 0 37.9 25.9
 -11 6 0 85.69 53.59
 10 -6 0 2.5 16.9
 10 -6 0 31.6 25.4
 -10 6 0 7.4 46.8
 9 -6 0 19 18.1
 9 -6 0 21.8 22.9
 -9 6 0 34.7 45
 8 -6 0 359.16 41.3
 8 -6 0 310.17 28
 -8 6 0 330.17 58.99
 7 -6 0 963.8 58.29
 7 -6 0 855.91 41.5
 -7 6 0 969.8 85.29
 6 -6 0 21.6 14.3
 6 -6 0 -6.3 16.2
 -6 6 0 4.5 34.6
 5 -6 0 145.49 22.3
 5 -6 0 108.99 16.9
 -5 6 0 115.39 36.4
 4 -6 0 273.07 27.5
 4 -6 0 246.88 21.2
 -4 6 0 216.68 17.1
 -4 6 0 234.28 44.2
 3 -6 0 197.28 23.1
 3 -6 0 203.28 19.6
 -3 6 0 192.48 18.2
 -3 6 0 246.98 38.3
 2 -6 0 25 11.3
 2 -6 0 22.6 11
 -2 6 0 10.6 23.6
 -2 6 0 9.7 11.9
 1 -6 0 2074.89 89.99
 1 -6 0 2420.46 73.49
 -1 6 0 2401.46 122.89
 -1 6 0 2405.86 85.49
 0 -6 0 838.02 32.7
 0 6 0 855.21 57.09
 0 6 0 774.52 38.6
 -1 -6 0 1030.6 39.1
 1 6 0 1085.19 64.79
 1 6 0 1131.59 48.1
 -2 -6 0 153.58 15.3
 2 6 0 156.28 20.8
 -3 -6 0 60.59 11.7
 3 6 0 26.2 9.7
 3 6 0 38 16
 3 6 0 49.8 18.4
 -4 -6 0 11.1 10
 4 6 0 -4 9.3
 4 6 0 14.5 14.9
 4 6 0 5.6 14.7
 -5 -6 0 27.9 10
 5 6 0 48.7 13.8
 5 6 0 44.4 19.2
 5 6 0 56.19 17.6
 -6 -6 0 32.9 10.9
 6 6 0 31.3 14.8
 6 6 0 44.7 17.5
 6 6 0 31.8 20.1
 -7 -6 0 221.08 18.8
 7 6 0 215.58 37.6
 7 6 0 243.18 28
 -8 -6 0 67.49 20.8
 8 6 0 85.29 20.5
 8 6 0 43.2 23.6
 -9 -6 0 49.5 20.5
 9 6 0 60.09 14.3
 9 6 0 45.4 27.4
 9 6 0 78.39 23.6
 -10 -6 0 46.8 22.3
 10 6 0 66.89 29.5
 10 6 0 59.19 23.7
 10 6 0 73.29 15.2
 -11 -6 0 22.8 22.2
 11 6 0 -0.3 13.6
 11 6 0 16.7 26.7
 11 6 0 4.7 21.4
 -12 -6 0 57.29 24.3
 12 6 0 21.9 24.7
 12 6 0 48.1 33.6
 12 6 0 61.49 17.9
 -13 -6 0 29.4 24
 13 6 0 20.3 27.4
 13 6 0 18.6 31.6
 13 6 0 31.1 21
 -14 -6 0 174.78 64.89
 -14 -6 0 132.79 31.5
 14 6 0 88.39 32.2
 -15 -6 0 126.59 60.89
 -15 -6 0 57.89 27.9
 15 6 0 56.59 31.4
 -16 -6 0 224.48 75.99
 16 6 0 42.5 32.7
 -17 -6 0 347.37 87.09
 16 -7 0 8.3 25.9
 16 -7 0 28.1 36.4
 -16 7 0 2.1 62.79
 15 -7 0 18 33.6
 15 -7 0 23.1 26.2
 -15 7 0 20.2 59.79
 14 -7 0 41.4 25.8
 14 -7 0 17.4 30
 -14 7 0 20.2 57.99
 13 -7 0 9 27.5
 13 -7 0 13.9 22.6
 -13 7 0 45.3 56.99
 12 -7 0 148.19 36.1
 12 -7 0 131.09 27.1
 -12 7 0 82.69 59.49
 11 -7 0 -4.5 19.5
 11 -7 0 8.3 23.6
 -11 7 0 7 51.29
 10 -7 0 11.1 18.1
 10 -7 0 36.7 25.5
 -10 7 0 -28.3 49.1
 9 -7 0 32.7 17.6
 9 -7 0 14.7 22.3
 -9 7 0 22.6 50.19
 8 -7 0 100.89 20.4
 8 -7 0 121.39 28.2
 -8 7 0 149.29 53.49
 7 -7 0 205.78 23.3
 7 -7 0 180.78 29.5
 -7 7 0 185.98 50.69
 6 -7 0 17.3 14.1
 6 -7 0 7.6 17.6
 -6 7 0 24.5 35.8
 5 -7 0 199.48 25.7
 5 -7 0 254.77 24.2
 -5 7 0 215.78 44.1
 4 -7 0 2.5 13.3
 4 -7 0 11.4 12.2
 -4 7 0 -6.6 9.8
 -4 7 0 26.6 31.2
 3 -7 0 30.6 13.5
 3 -7 0 17.7 12.4
 -3 7 0 21.9 11.9
 -3 7 0 56.79 29.4
 2 -7 0 161.18 21.6
 2 -7 0 214.78 20.4
 -2 7 0 167.18 20.5
 1 -7 0 13.8 11.4
 -1 7 0 -3 7.7
 -1 7 0 -28.7 12.5
 -1 7 0 30.8 23
 0 -7 0 965.4 37.6
 0 7 0 1012.7 45.9
 0 7 0 957.7 65.39
 -1 -7 0 57.79 12.8
 1 7 0 41.6 20.7
 1 7 0 46.7 16.7
 -2 -7 0 268.47 21
 2 7 0 199.18 25.1
 2 7 0 275.37 34.9
 -3 -7 0 820.52 35
 3 7 0 910.81 58.99
 3 7 0 863.11 45
 -4 -7 0 57.69 13.3
 4 7 0 64.19 12.3
 4 7 0 69.99 21.7
 4 7 0 58.19 18.3
 -5 -7 0 2.6 10.5
 5 7 0 6.6 17.4
 5 7 0 9.8 16.5
 5 7 0 18.2 11.6
 -6 -7 0 1112.39 42.9
 6 7 0 1171.98 77.79
 6 7 0 1186.58 57.19
 6 7 0 1278.17 58.09
 -7 -7 0 41.9 12.5
 7 7 0 70.69 18
 7 7 0 69.99 26.4
 -8 -7 0 -6.4 11.6
 -8 -7 0 -18.1 16.7
 8 7 0 -1.1 16.1
 8 7 0 12.5 22.2
 -9 -7 0 123.49 18
 -9 -7 0 134.39 26.8
 9 7 0 85.79 31.1
 9 7 0 137.19 25.9
 -10 -7 0 -9.3 20.1
 -10 -7 0 7.2 13.9
 10 7 0 22.6 27.3
 10 7 0 -7.8 20
 -11 -7 0 -13.4 20.6
 -11 -7 0 -23.8 13.9
 11 7 0 -2.5 22.2
 11 7 0 -10.2 25.2
 -12 -7 0 36.7 23.9
 12 7 0 28.2 25.9
 12 7 0 14.3 30.8
 -13 -7 0 44.3 25.8
 13 7 0 10 26.1
 13 7 0 8 32.1
 -14 -7 0 34.5 26.3
 14 7 0 25.3 28.7
 14 7 0 30 37.9
 -15 -7 0 243.58 71.99
 -15 -7 0 90.89 31.9
 -16 -7 0 236.58 77.19
 16 7 0 23.3 31.5
 -17 -7 0 339.37 90.39
 16 -8 0 65.79 40.2
 16 -8 0 -1.2 27.8
 -16 8 0 12 69.99
 15 -8 0 -3.2 32.7
 15 -8 0 -10 25.4
 -15 8 0 -36.7 62.69
 14 -8 0 81.69 35.4
 14 -8 0 39.4 26.4
 -14 8 0 83.39 66.59
 13 -8 0 9.8 28.9
 13 -8 0 21.3 23.5
 -13 8 0 -4.3 59.99
 12 -8 0 22.8 27.2
 12 -8 0 -2.1 20.8
 -12 8 0 21.9 61.39
 11 -8 0 169.08 37.1
 11 -8 0 172.28 27.8
 -11 8 0 143.89 64.49
 10 -8 0 5.2 18.1
 10 -8 0 15.4 24.7
 -10 8 0 27.4 56.29
 9 -8 0 -20.1 20.7
 9 -8 0 -20.2 15.7
 -9 8 0 3.7 51.09
 8 -8 0 35.2 24.2
 8 -8 0 28.9 18.3
 -8 8 0 69.49 50.19
 7 -8 0 116.39 20.7
 7 -8 0 121.89 26.8
 -7 8 0 84.79 48
 6 -8 0 51.89 17.2
 6 -8 0 53.39 20.3
 -6 8 0 76.09 43
 5 -8 0 -11.8 14.3
 5 -8 0 0.9 13.9
 -5 8 0 10.1 34.2
 4 -8 0 18.2 14.8
 4 -8 0 40.9 14.6
 -4 8 0 11.3 12.2
 -4 8 0 36.9 31.9
 3 -8 0 194.28 21
 3 -8 0 170.98 20.6
 -3 8 0 186.98 37.3
 -3 8 0 203.78 20.4
 2 -8 0 17.8 10.8
 2 -8 0 14.3 12.1
 -2 8 0 7.8 24.9
 -2 8 0 -19.4 13
 1 -8 0 527.25 28.8
 -1 8 0 498.35 33.1
 -1 8 0 541.75 52.09
 0 -8 0 181.48 18.7
 0 8 0 143.19 21.9
 0 8 0 174.18 31.8
 -1 -8 0 95.79 15.6
 1 8 0 115.49 26.2
 1 8 0 79.89 19.5
 -2 -8 0 10.2 12.6
 2 8 0 6.7 17.3
 2 8 0 1.1 15.7
 -3 -8 0 52.79 14.3
 3 8 0 33.1 18.2
 3 8 0 26.4 19
 -4 -8 0 67.09 14.1
 4 8 0 66.49 22.6
 4 8 0 100.49 21.1
 4 8 0 65.89 12.1
 -5 -8 0 7 11.9
 5 8 0 17.8 12.1
 5 8 0 22 18.5
 5 8 0 21.4 20
 -6 -8 0 346.17 23.3
 6 8 0 417.06 30.4
 6 8 0 385.16 34.4
 6 8 0 324.17 41.6
 -7 -8 0 556.34 29.7
 7 8 0 631.34 41.9
 7 8 0 521.45 54.99
 7 8 0 665.53 41.1
 -8 -8 0 68.89 15.1
 -8 -8 0 85.29 24.4
 8 8 0 47.6 27.2
 8 8 0 57.39 21.7
 -9 -8 0 -12.7 20.8
 -9 -8 0 8.5 13.2
 9 8 0 -1.5 23.3
 9 8 0 18.6 18.7
 -10 -8 0 32.9 17.4
 -10 -8 0 50.39 24.8
 10 8 0 18.3 22.6
 10 8 0 46.4 29.7
 -11 -8 0 -5.2 15.2
 -11 -8 0 -0.7 22.5
 11 8 0 5.4 26.8
 11 8 0 14.6 22.9
 -12 -8 0 4.5 23.4
 -12 -8 0 -16.1 16.7
 12 8 0 0.3 27.3
 12 8 0 15.7 25.5
 -13 -8 0 131.79 32.2
 13 8 0 129.29 33.2
 13 8 0 128.09 43.9
 -14 -8 0 176.38 36
 14 8 0 119.39 47.3
 14 8 0 107.29 33.8
 -15 -8 0 85.89 32
 15 8 0 29 42.6
 15 8 0 40.7 31.5
 -16 -8 0 378.56 86.39
 -17 -8 0 535.95 101.49
 15 -9 0 7.8 27.3
 15 -9 0 43.9 37
 -15 9 0 0.6 68.59
 14 -9 0 -12.2 22.9
 14 -9 0 -9.3 30.8
 -14 9 0 -42.9 62.49
 13 -9 0 2.2 22.8
 13 -9 0 5.1 29.4
 -13 9 0 -38.6 60.79
 12 -9 0 9.1 27
 12 -9 0 36.2 24.4
 -12 9 0 -23.1 59.59
 11 -9 0 101.89 32.6
 11 -9 0 48.7 23.5
 -11 9 0 37.2 58.59
 10 -9 0 293.77 42.6
 10 -9 0 335.17 34
 -10 9 0 248.78 67.89
 9 -9 0 6.2 23.2
 9 -9 0 -0.4 18.1
 -9 9 0 48.6 56.89
 8 -9 0 10.6 16.4
 8 -9 0 22 23
 -8 9 0 58.89 53.19
 7 -9 0 180.38 24.3
 7 -9 0 252.07 34.3
 -7 9 0 241.28 57.19
 6 -9 0 133.49 25.9
 6 -9 0 156.18 22.5
 -6 9 0 143.39 49.2
 5 -9 0 20.3 17.8
 5 -9 0 44.6 16.6
 -5 9 0 35.6 37.4
 -5 9 0 34.7 12.4
 4 -9 0 437.06 30.1
 4 -9 0 515.55 37.1
 -4 9 0 445.76 62.19
 -4 9 0 483.75 28.8
 3 -9 0 5.6 13
 3 -9 0 9.5 12.9
 -3 9 0 26.4 30.6
 -3 9 0 12.5 13.7
 2 -9 0 133.09 18.5
 -2 9 0 84.99 20
 -2 9 0 147.09 34.3
 1 -9 0 15.2 13.7
 -1 9 0 -23.1 14.1
 -1 9 0 20 24.8
 0 -9 0 56.89 15.1
 0 9 0 61.59 26.2
 0 9 0 30.4 17
 -1 -9 0 0.6 13
 1 9 0 -2.4 15.8
 1 9 0 20.8 20.7
 -2 -9 0 236.78 23
 2 9 0 236.68 28.5
 2 9 0 267.27 39.2
 -3 -9 0 266.47 23.5
 3 9 0 278.67 30.5
 3 9 0 267.97 36.7
 -4 -9 0 21.8 13.6
 4 9 0 46.1 21.5
 4 9 0 10.2 18.5
 -5 -9 0 2 12.6
 5 9 0 14.2 11.3
 5 9 0 7.8 19.5
 5 9 0 20.1 19.1
 -6 -9 0 671.63 34
 6 9 0 751.42 62.19
 6 9 0 764.62 47.8
 6 9 0 772.12 41.9
 -7 -9 0 29.6 14.7
 7 9 0 21.4 24.3
 7 9 0 40.1 16.9
 7 9 0 38.5 22.4
 -8 -9 0 18.4 14.8
 -8 -9 0 8.8 21.4
 8 9 0 30.4 18.7
 8 9 0 2.7 23.4
 -9 -9 0 30.2 23.3
 -9 -9 0 32.8 16
 9 9 0 26.9 29.1
 9 9 0 23.4 22.8
 -10 -9 0 -20 22.5
 -10 -9 0 13.5 15.6
 10 9 0 18.2 21.7
 10 9 0 8.4 27
 -11 -9 0 12.4 25.1
 -11 -9 0 27.5 16.4
 11 9 0 40.3 25.1
 11 9 0 -6.5 26.7
 -12 -9 0 81.99 30.1
 12 9 0 63.19 28.3
 12 9 0 31.4 33.5
 -13 -9 0 6 26.4
 13 9 0 36 28.3
 13 9 0 11.2 34.5
 -14 -9 0 81.29 32.7
 14 9 0 49.2 29.3
 14 9 0 43.7 40.9
 -15 -9 0 53.29 31.9
 15 9 0 -6.1 30.1
 15 9 0 29.2 41.9
 -16 -9 0 149.69 36.5
 16 9 0 74.49 36.3
 -17 -9 0 336.47 89.29
 15 -10 0 -8.2 27.2
 15 -10 0 1.7 35.6
 -15 10 0 -18.5 75.39
 14 -10 0 -0.7 34
 14 -10 0 19.1 25.7
 -14 10 0 6.8 72.79
 13 -10 0 38.8 32.8
 13 -10 0 43.9 26.2
 -13 10 0 23.8 69.09
 12 -10 0 62.89 32.8
 12 -10 0 -0.2 21.7
 -12 10 0 12.8 63.49
 11 -10 0 162.18 38.1
 11 -10 0 152.18 28.9
 -11 10 0 157.48 67.69
 10 -10 0 -5.6 24.6
 10 -10 0 11.8 20.3
 -10 10 0 -6.9 56.89
 9 -10 0 -7.1 18.4
 9 -10 0 1.6 24
 -9 10 0 66.29 56.59
 8 -10 0 312.57 33.3
 8 -10 0 370.86 46.8
 -8 10 0 286.07 66.39
 7 -10 0 45.4 23.7
 7 -10 0 16.1 18.5
 -7 10 0 54.69 49.1
 6 -10 0 -6 15.9
 6 -10 0 1.6 20.1
 -6 10 0 7.8 42.2
 5 -10 0 77.49 19
 5 -10 0 83.89 22.3
 -5 10 0 94.39 16.1
 -5 10 0 104.19 40.8
 4 -10 0 -7.2 15.1
 4 -10 0 13.1 15.9
 -4 10 0 15 34.6
 -4 10 0 3.6 13.2
 3 -10 0 56.79 17.2
 -3 10 0 72.09 34.1
 -3 10 0 33.8 16.2
 2 -10 0 14.4 14.1
 -2 10 0 25.6 29.1
 -2 10 0 -37.2 14.9
 -2 10 0 36.7 10.7
 1 -10 0 16.8 14.4
 -1 10 0 2.4 25.7
 -1 10 0 2.1 16.3
 0 -10 0 203.58 22.2
 0 10 0 161.88 24.5
 0 10 0 163.88 34.8
 -1 -10 0 64.79 15.7
 1 10 0 64.59 21.2
 1 10 0 70.99 26.7
 -2 -10 0 46 16.2
 2 10 0 60.99 21.3
 2 10 0 90.29 27
 -3 -10 0 208.78 22.7
 3 10 0 228.48 39.8
 3 10 0 213.58 29.4
 -4 -10 0 92.49 17.8
 4 10 0 104.29 24.9
 4 10 0 83.79 27.4
 -5 -10 0 316.17 26.7
 5 10 0 332.57 36.6
 5 10 0 309.17 45
 -6 -10 0 37.7 16.4
 6 10 0 56.89 24.3
 6 10 0 17.3 23.2
 6 10 0 34 15.3
 -7 -10 0 226.98 23.8
 7 10 0 262.97 31.5
 7 10 0 200.68 38.6
 -8 -10 0 48.2 24.1
 -8 -10 0 37.8 16.7
 8 10 0 41.9 20.4
 8 10 0 13.4 26
 -9 -10 0 55.39 18.5
 -9 -10 0 48 25.1
 9 10 0 29.9 27.3
 9 10 0 38.2 21.9
 -10 -10 0 14.7 25.2
 -10 -10 0 3 16
 10 10 0 -15.9 26.2
 10 10 0 4.8 21.9
 -11 -10 0 -7.4 16.2
 -11 -10 0 0.8 24.6
 11 10 0 -28.3 26.2
 11 10 0 28.4 24.7
 -12 -10 0 36.9 28.4
 12 10 0 32.3 33.8
 12 10 0 36.8 26.8
 -13 -10 0 75.19 31.7
 13 10 0 55.59 29.8
 13 10 0 27.6 35.6
 -14 -10 0 73.89 33
 14 10 0 51.99 41.2
 14 10 0 109.99 33.9
 -15 -10 0 61.49 32.4
 15 10 0 -9.7 38.1
 15 10 0 -1 30.2
 -16 -10 0 147.79 38.6
 16 10 0 135.49 41.4
 16 10 0 72.09 52.59
 14 -11 0 41.3 38
 14 -11 0 14.6 27.5
 -14 11 0 -90.19 68.79
 13 -11 0 10.5 23.9
 13 -11 0 -4.7 32.2
 -13 11 0 -120.29 62.89
 12 -11 0 7.9 30.9
 12 -11 0 6.1 23.9
 -12 11 0 -54.89 64.19
 11 -11 0 83.29 33.8
 11 -11 0 57.29 25.6
 -11 11 0 67.39 65.69
 10 -11 0 149.49 36.4
 10 -11 0 131.59 27.1
 -10 11 0 132.59 67.49
 9 -11 0 -5.7 19.4
 9 -11 0 -17.9 24.8
 -9 11 0 30.5 56.49
 8 -11 0 48.4 20.6
 8 -11 0 47 27
 -8 11 0 58.29 54.39
 7 -11 0 504.85 38.2
 7 -11 0 502.95 50.29
 -7 11 0 538.55 86.99
 6 -11 0 4.4 18
 6 -11 0 35.7 21.6
 -6 11 0 29.1 42.9
 5 -11 0 122.69 24.2
 5 -11 0 133.99 23.2
 -5 11 0 110.99 45
 4 -11 0 116.69 22
 -4 11 0 130.09 20.2
 -4 11 0 99.99 41.5
 3 -11 0 -9.1 15.2
 -3 11 0 12.2 32.2
 -3 11 0 17.4 16.3
 -3 11 0 6.7 12.9
 2 -11 0 64.19 18.4
 -2 11 0 104.59 36.2
 -2 11 0 80.29 20.4
 1 -11 0 271.17 27.3
 -1 11 0 261.17 44.2
 -1 11 0 260.57 29.9
 0 -11 0 16.8 16.2
 0 11 0 -9.7 19.1
 0 11 0 17.3 26.5
 -1 -11 0 15.3 15.2
 1 11 0 0.3 18.9
 1 11 0 11.2 23.8
 -2 -11 0 79.09 19.1
 2 11 0 80.69 29
 2 11 0 78.09 23.7
 -3 -11 0 54.89 18.6
 3 11 0 72.89 24.1
 3 11 0 54.69 26.6
 -4 -11 0 28.7 16.9
 4 11 0 13.1 23.2
 4 11 0 -10.2 20.9
 -5 -11 0 140.69 21.5
 5 11 0 180.78 30.7
 5 11 0 120.19 32.1
 -6 -11 0 107.39 21
 6 11 0 80.69 30.8
 6 11 0 111.09 28.6
 -7 -11 0 26.1 18.1
 7 11 0 34.9 17.2
 7 11 0 -1.2 23.2
 -8 -11 0 -6.7 17.2
 -8 -11 0 -9.6 22.6
 8 11 0 2.8 25.3
 8 11 0 5.5 18.6
 -9 -11 0 25.4 18.5
 -9 -11 0 50.39 27.1
 9 11 0 40.3 29.4
 9 11 0 54.69 21.4
 -10 -11 0 -20.8 23.9
 -10 -11 0 17.9 18.1
 10 11 0 11.7 21.6
 10 11 0 2.6 28.4
 -11 -11 0 16.7 27.5
 -11 -11 0 38.6 23.6
 11 11 0 67.49 26.2
 11 11 0 36.5 33.3
 -12 -11 0 42.4 28.7
 12 11 0 34.8 27
 12 11 0 31.6 35.4
 -13 -11 0 25.3 29.8
 13 11 0 0.5 34.3
 13 11 0 -0.5 27.1
 -14 -11 0 88.89 35.1
 14 11 0 54.19 43
 14 11 0 85.29 34.5
 -15 -11 0 24.2 33
 15 11 0 23.7 43.1
 -16 -11 0 76.89 35.6
 16 11 0 -2.1 43.6
 14 -12 0 33.9 28.1
 14 -12 0 -52.59 34.6
 -14 12 0 -109.09 73.49
 13 -12 0 -20.5 33.3
 13 -12 0 57.79 28.7
 -13 12 0 -44.5 72.79
 12 -12 0 70.69 37.3
 12 -12 0 22.7 25.1
 -12 12 0 13.2 73.69
 11 -12 0 58.89 26.1
 11 -12 0 45 33
 -11 12 0 -21.6 66.39
 10 -12 0 28.6 31.1
 10 -12 0 34.2 22.9
 -10 12 0 13.4 61.19
 9 -12 0 -30.1 18.8
 9 -12 0 -43.4 25.2
 -9 12 0 -15 53.79
 8 -12 0 33.3 19.4
 8 -12 0 73.69 29.2
 -8 12 0 49.3 52.49
 7 -12 0 8.7 18.7
 7 -12 0 -33.6 21.9
 -7 12 0 4.2 45.6
 6 -12 0 13 18.2
 6 -12 0 -39 19.9
 -6 12 0 10.3 44.2
 5 -12 0 151.28 24.6
 -5 12 0 91.79 45.7
 4 -12 0 234.38 27.4
 -4 12 0 254.37 28.4
 -4 12 0 237.78 50.59
 -4 12 0 295.37 30.1
 3 -12 0 16.8 17.4
 -3 12 0 38.1 13.7
 -3 12 0 52.29 37.4
 -3 12 0 15 17.7
 2 -12 0 -3.1 15.6
 -2 12 0 -19.7 29.7
 -2 12 0 -16 17.4
 1 -12 0 23.9 17.9
 -1 12 0 39.7 21.5
 -1 12 0 54.29 31.9
 0 -12 0 87.29 21.4
 0 12 0 79.89 23.5
 0 12 0 69.69 32.6
 -1 -12 0 13.3 17.8
 1 12 0 4.6 20.4
 1 12 0 3.5 25.7
 -2 -12 0 -5.7 16.7
 2 12 0 19.7 25.4
 2 12 0 3.6 21.1
 -3 -12 0 309.37 31.4
 3 12 0 330.97 48.1
 3 12 0 344.37 38.7
 -4 -12 0 19.4 18.2
 4 12 0 27.6 26.8
 4 12 0 50.19 25.3
 -5 -12 0 17.6 18.8
 5 12 0 29.5 26.6
 5 12 0 33.7 25.1
 -6 -12 0 523.45 36.8
 6 12 0 595.84 49.7
 6 12 0 483.65 60.29
 -7 -12 0 198.98 26.2
 7 12 0 166.98 39.1
 -8 -12 0 29.8 26
 -8 -12 0 -5.7 19.1
 8 12 0 7.5 27.9
 -9 -12 0 64.39 29.4
 -9 -12 0 61.79 21.6
 9 12 0 62.89 32.8
 -10 -12 0 48.3 21.6
 -10 -12 0 69.09 29.9
 10 12 0 76.09 34.9
 -11 -12 0 -20.3 26
 11 12 0 -7.3 30.2
 -12 -12 0 35.2 31.3
 12 12 0 18.4 35.4
 -13 -12 0 39.5 31.6
 13 12 0 20.4 36.1
 -14 -12 0 37.2 33.7
 14 12 0 24.3 38.2
 -15 -12 0 26.1 32.4
 15 12 0 -17 39.9
 13 -13 0 -63.69 34.4
 13 -13 0 -18.2 25.6
 -13 13 0 -107.79 70.29
 12 -13 0 -56.39 32.7
 12 -13 0 -10.2 23.4
 -12 13 0 -68.09 65.39
 11 -13 0 -64.29 29.9
 11 -13 0 -6.1 23.3
 -11 13 0 -69.39 61.99
 10 -13 0 -37.3 29.7
 10 -13 0 12.5 22.6
 -10 13 0 -12 59.69
 9 -13 0 -7.6 20.3
 -9 13 0 10.4 54.49
 8 -13 0 58.79 30.3
 8 -13 0 33.8 21.7
 -8 13 0 51.69 53.39
 7 -13 0 -40.8 24.1
 7 -13 0 -2.6 19
 -7 13 0 -1.3 49.1
 6 -13 0 5.1 19.5
 -6 13 0 -2.2 45.4
 5 -13 0 224.88 29.7
 -5 13 0 209.48 52.79
 4 -13 0 93.99 23
 -4 13 0 78.89 18.1
 -4 13 0 59.39 42.8
 3 -13 0 81.09 22.1
 -3 13 0 72.69 40.4
 -3 13 0 72.59 21.7
 2 -13 0 26.7 18.5
 -2 13 0 -14.3 31.3
 -2 13 0 32.3 20.5
 1 -13 0 48 20
 -1 13 0 72.39 34.2
 -1 13 0 56.49 24
 0 -13 0 160.98 26.3
 0 13 0 140.89 38.5
 0 13 0 141.49 27.7
 -1 -13 0 107.89 23
 1 13 0 175.18 30
 1 13 0 109.79 37.1
 -2 -13 0 37.9 19.4
 2 13 0 75.29 32.5
 2 13 0 70.19 25.8
 -3 -13 0 12.5 18.9
 3 13 0 -2 23.2
 3 13 0 -3 25.3
 -4 -13 0 39.3 20.3
 4 13 0 38.6 28.9
 4 13 0 29.7 25.6
 -5 -13 0 218.18 28.3
 5 13 0 206.08 35.5
 5 13 0 163.58 40.1
 -6 -13 0 -9.2 18.3
 6 13 0 -2.2 25.9
 -7 -13 0 19.1 25
 -7 -13 0 9.5 19.7
 7 13 0 18.5 28.7
 -8 -13 0 8.6 24.8
 -8 -13 0 5.7 18.9
 8 13 0 -0.3 26.3
 -9 -13 0 21.3 20.6
 -9 -13 0 23.9 27.2
 9 13 0 3.8 29.1
 -10 -13 0 1.3 20.8
 -10 -13 0 6.6 26.8
 10 13 0 2.1 29
 -11 -13 0 12.5 29.5
 11 13 0 35.8 34.4
 -12 -13 0 50.19 33
 12 13 0 11.5 33.8
 -13 -13 0 160.88 40.5
 13 13 0 82.19 46.7
 -14 -13 0 112.69 39.6
 14 13 0 58.89 44.5
 -15 -13 0 60.19 36.4
 15 13 0 30.1 44.8
 12 -14 0 34.4 27.9
 -12 14 0 -63.79 67.99
 11 -14 0 -30.5 21.4
 -11 14 0 -67.79 62.39
 10 -14 0 -30.6 20.6
 -10 14 0 -74.69 57.89
 9 -14 0 7.9 22.9
 -9 14 0 -40.7 54.49
 8 -14 0 5.7 20.7
 -8 14 0 -23.6 53.49
 7 -14 0 41.7 23.1
 -7 14 0 76.39 54.49
 6 -14 0 29.2 21
 -6 14 0 -5.8 44.5
 5 -14 0 28.2 15.6
 5 -14 0 37.6 20.1
 -5 14 0 -36.8 39.7
 4 -14 0 56.19 23.6
 -4 14 0 87.69 43.5
 3 -14 0 35.5 20.3
 -3 14 0 40.1 37.8
 2 -14 0 -1.1 18.7
 -2 14 0 13.2 20.2
 -2 14 0 -3.1 32.8
 1 -14 0 66.39 22.6
 -1 14 0 61.39 36.9
 -1 14 0 90.09 26.4
 0 -14 0 133.79 25.7
 0 14 0 93.29 38.4
 0 14 0 98.39 27
 -1 -14 0 -25.6 18.8
 1 14 0 -0.1 23.7
 1 14 0 7.8 30.3
 -2 -14 0 -9.5 20.1
 2 14 0 42.2 26.4
 2 14 0 51.49 33.1
 -3 -14 0 183.18 27.9
 3 14 0 133.99 37.6
 3 14 0 153.18 32.7
 -4 -14 0 18.4 21.2
 4 14 0 -27.1 24.9
 4 14 0 -18 24.9
 -5 -14 0 84.59 24.4
 5 14 0 66.09 33.4
 -6 -14 0 488.85 38.5
 6 14 0 454.95 62.59
 -7 -14 0 86.49 23.3
 -7 -14 0 86.79 29.8
 7 14 0 62.79 33.5
 -8 -14 0 -0.8 26.3
 -8 -14 0 34.2 22.4
 8 14 0 -3.5 28.4
 -9 -14 0 178.28 38
 -9 -14 0 128.99 26.8
 9 14 0 124.09 40.8
 -10 -14 0 2.8 28.7
 10 14 0 17.5 31.5
 -11 -14 0 76.39 35
 11 14 0 19.8 35.1
 -12 -14 0 25.6 32.2
 12 14 0 20.7 37.5
 -13 -14 0 82.99 37
 13 14 0 33.2 40
 -14 -14 0 86.69 38.1
 14 14 0 28.3 43
 12 -15 0 -42.5 23.1
 -12 15 0 -119.79 68.69
 11 -15 0 15.1 25.2
 -11 15 0 -58.79 68.29
 10 -15 0 9.3 23
 -10 15 0 -36.7 64.79
 9 -15 0 -8 22.2
 -9 15 0 -60.49 57.59
 8 -15 0 2.4 21.3
 -8 15 0 -31.1 54.19
 7 -15 0 -2 21.5
 -7 15 0 -33.8 45.4
 6 -15 0 60.69 24.3
 -6 15 0 35.5 48.7
 5 -15 0 292.17 33.9
 -5 15 0 245.08 58.69
 4 -15 0 77.59 20.5
 4 -15 0 47.1 22.6
 -4 15 0 12.3 41.1
 3 -15 0 14.1 20.3
 -3 15 0 -17.4 36.6
 2 -15 0 -1.2 20.1
 -2 15 0 1 36.2
 1 -15 0 4.7 20.1
 -1 15 0 -0.5 22.7
 -1 15 0 -12.8 30.8
 0 -15 0 58.49 24.8
 0 15 0 23.9 33.6
 0 15 0 20.2 24.4
 -1 -15 0 20.3 22.1
 1 15 0 -11.3 30.5
 1 15 0 -24 23
 -2 -15 0 14.3 23.4
 2 15 0 76.79 28.2
 2 15 0 -2.6 30.6
 -3 -15 0 5.5 21.9
 3 15 0 -1.5 28.9
 3 15 0 17.5 26.4
 -4 -15 0 -2.5 21.4
 4 15 0 14.6 30.6
 -5 -15 0 28.8 23.2
 5 15 0 22.9 32.4
 -6 -15 0 36.3 28.3
 -6 -15 0 35.4 24.3
 6 15 0 13.5 30.8
 -7 -15 0 5.8 26.5
 -7 -15 0 -37.7 20.8
 7 15 0 0.3 28.9
 -8 -15 0 -8.3 26.4
 -8 -15 0 22.8 23.7
 8 15 0 23.8 32.7
 -9 -15 0 44 31.8
 -9 -15 0 66.89 25.7
 9 15 0 34.7 34.3
 -10 -15 0 57.19 32.7
 10 15 0 32.5 34.5
 -11 -15 0 18.6 32.4
 11 15 0 3.7 34
 -12 -15 0 67.09 36.1
 12 15 0 -8.2 35.6
 -13 -15 0 91.69 38.6
 13 15 0 22.4 42
 -14 -15 0 31.1 35.1
 14 15 0 16.8 43.4
 11 -16 0 -9.6 24.9
 -11 16 0 -91.79 69.99
 10 -16 0 -5.4 24.3
 -10 16 0 -52.69 62.19
 9 -16 0 22.2 24.2
 -9 16 0 -29.9 59.79
 8 -16 0 17.7 23.6
 -8 16 0 -46.9 52.09
 7 -16 0 48.5 25.2
 -7 16 0 4.6 53.19
 6 -16 0 -24.8 20.8
 -6 16 0 -9.7 45.1
 5 -16 0 13.1 21.9
 -5 16 0 -22.4 41.6
 4 -16 0 163.48 26.4
 4 -16 0 144.79 29.7
 -4 16 0 89.09 45.1
 3 -16 0 4.7 18.8
 3 -16 0 30.7 23.9
 -3 16 0 3.7 36.9
 2 -16 0 27.8 22.8
 -2 16 0 6.4 36.9
 1 -16 0 213.78 32.6
 -1 16 0 137.69 45.4
 0 -16 0 50.99 24.4
 0 16 0 32.8 36.2
 -1 -16 0 -16.8 22.2
 1 16 0 5.6 33.1
 -2 -16 0 105.59 28
 2 16 0 58.89 37
 -3 -16 0 -8.9 21.4
 3 16 0 -2.4 30.2
 -4 -16 0 9.9 24.7
 4 16 0 -12 28.2
 -5 -16 0 49.1 29.5
 -5 -16 0 -30.8 22.3
 5 16 0 29.7 34.2
 -6 -16 0 77.69 27.5
 -6 -16 0 86.39 33.1
 6 16 0 81.39 38.6
 -7 -16 0 19.9 24.9
 -7 -16 0 23.4 28.5
 7 16 0 1.8 33
 -8 -16 0 118.69 36.5
 -8 -16 0 91.09 28.7
 8 16 0 50.39 36.1
 -9 -16 0 53.59 32.3
 -9 -16 0 12.5 27.2
 9 16 0 1.2 33
 -10 -16 0 -4.9 29.9
 10 16 0 5.1 35.4
 -11 -16 0 6.2 31.6
 11 16 0 0.4 34.2
 -12 -16 0 110.59 41.6
 12 16 0 25.4 39.6
 -13 -16 0 61.19 37.7
 13 16 0 7.1 40.4
 10 -17 0 -13.8 25.7
 -10 17 0 -78.19 61.89
 9 -17 0 7 26.3
 -9 17 0 -26.7 60.79
 8 -17 0 21.4 25.7
 -8 17 0 -19.2 57.69
 7 -17 0 21 25.5
 -7 17 0 -56.89 47.3
 6 -17 0 6.7 24.7
 -6 17 0 -7.2 49.2
 5 -17 0 22.1 24.3
 -5 17 0 65.89 48.2
 4 -17 0 -31.5 22.6
 -4 17 0 -11.2 40.2
 3 -17 0 7.1 23.3
 3 -17 0 2.7 19.6
 -3 17 0 -3.9 39.9
 2 -17 0 44.2 23.2
 2 -17 0 -22.9 22.1
 -2 17 0 18.9 40.6
 1 -17 0 -5.4 23.9
 1 -17 0 35.5 24
 -1 17 0 19.2 38.9
 0 -17 0 152.98 31.1
 0 -17 0 133.69 30
 0 17 0 103.89 44.5
 -1 -17 0 5 24.3
 -1 -17 0 -30.7 22.5
 1 17 0 -8.7 33
 -2 -17 0 4.1 24.7
 -2 -17 0 -27.3 23.2
 2 17 0 -0.5 31.8
 -3 -17 0 48.3 28.1
 -3 -17 0 50.19 29.5
 3 17 0 -8.7 31.5
 -4 -17 0 -15.7 24.6
 -4 -17 0 11.3 26.8
 4 17 0 -3.1 33
 -5 -17 0 64.99 30.6
 -5 -17 0 34.5 27.5
 5 17 0 29.1 36.5
 -6 -17 0 19.6 29.6
 -6 -17 0 -34.1 25.3
 6 17 0 -22.2 30.5
 -7 -17 0 44.3 27.3
 -7 -17 0 32.7 30.9
 7 17 0 18 35.3
 -8 -17 0 -0.8 26.6
 -8 -17 0 44.4 32.2
 8 17 0 -2.6 33.6
 -9 -17 0 80.79 36.3
 9 17 0 28.1 37.6
 -10 -17 0 39.7 35.7
 10 17 0 24.4 39.5
 -11 -17 0 60.79 38.1
 11 17 0 12.4 38.2
 -12 -17 0 92.49 39.5
 12 17 0 -0.7 39.8
 8 -18 0 23.8 25.8
 -8 18 0 -41.6 55.19
 7 -18 0 32.1 27.6
 -7 18 0 3.3 53.29
 6 -18 0 24.2 26.3
 -6 18 0 -26.6 47.2
 5 -18 0 2 26.8
 -5 18 0 -27.1 43.9
 4 -18 0 101.69 29.8
 -4 18 0 75.29 48.9
 3 -18 0 7.3 24.7
 3 -18 0 12.6 20.8
 -3 18 0 -18.8 38.2
 2 -18 0 -30.7 24.4
 2 -18 0 11.5 20.8
 -2 18 0 -19.8 37.2
 1 -18 0 137.79 30.1
 1 -18 0 93.49 29.5
 -1 18 0 97.59 47
 0 -18 0 24.5 27.1
 0 -18 0 -5.2 22.6
 0 18 0 -38.8 34.7
 -1 -18 0 31.1 27.6
 -1 -18 0 29.8 24.5
 1 18 0 19 38.8
 -2 -18 0 139.69 32.1
 -2 -18 0 135.89 34.2
 2 18 0 108.19 45.3
 -3 -18 0 17.9 26.5
 -3 -18 0 30.9 28.2
 3 18 0 -10.8 33.3
 -4 -18 0 30.6 28
 -4 -18 0 -4.4 26.6
 4 18 0 -8 34.4
 -5 -18 0 44.5 29.6
 -5 -18 0 46.4 31.4
 5 18 0 1.6 36.2
 -6 -18 0 -30.3 27.2
 -6 -18 0 18.2 31.6
 6 18 0 12.5 37.1
 -7 -18 0 -21.9 27.5
 -7 -18 0 11.6 31.1
 7 18 0 31.4 38.1
 -8 -18 0 35.1 33.9
 -8 -18 0 32.4 30.7
 8 18 0 41.2 38.8
 -9 -18 0 45.1 36.3
 9 18 0 0.7 38
 -10 -18 0 95.59 39.5
 10 18 0 -8.5 37.3
 -11 -18 0 52.89 38.2
 11 18 0 36.3 41.2
 7 -19 0 -11.7 26.9
 -7 19 0 -44.6 50.89
 6 -19 0 -12.9 27.5
 -6 19 0 -27.9 49.6
 5 -19 0 41.4 29.6
 -5 19 0 -2.3 47.6
 4 -19 0 -7.2 25
 -4 19 0 -40.3 42.7
 3 -19 0 -11.9 26.6
 -3 19 0 -1.8 42.7
 2 -19 0 50.99 24.4
 2 -19 0 -22.8 26.7
 -2 19 0 -31.1 39
 1 -19 0 52.69 26.1
 1 -19 0 6 29.2
 -1 19 0 10.6 42.8
 0 -19 0 29.3 25.1
 0 -19 0 -9.1 26.6
 0 19 0 -35.7 36.2
 -1 -19 0 -4.2 28.9
 -1 -19 0 41.9 27.3
 1 19 0 3.1 38.9
 -2 -19 0 73.09 31
 -2 -19 0 33.6 29.2
 2 19 0 18.7 39.1
 -3 -19 0 54.79 30.1
 -3 -19 0 21.3 30.4
 3 19 0 9.1 38.4
 -4 -19 0 31.1 30.1
 -4 -19 0 -58.99 27.5
 4 19 0 -33 33.6
 -5 -19 0 27.5 31.1
 -5 -19 0 -14.4 28.7
 5 19 0 -6.1 39.6
 -6 -19 0 69.19 34.3
 -6 -19 0 -18.9 30.2
 6 19 0 -20.5 36.2
 -7 -19 0 31.3 34.2
 -7 -19 0 -46.7 30
 7 19 0 1.7 39.1
 -8 -19 0 23.9 34.9
 8 19 0 20.6 39.9
 -9 -19 0 68.29 39.1
 9 19 0 25.9 41.5
 5 -20 0 25.7 29.4
 -5 20 0 13.5 51.99
 4 -20 0 34.7 29.8
 -4 20 0 -27.6 44.1
 3 -20 0 -15 27.5
 -3 20 0 -45.6 42.8
 2 -20 0 48.1 31
 2 -20 0 -8.2 29.3
 -2 20 0 -36 40.9
 1 -20 0 98.09 30.4
 1 -20 0 5.3 28.4
 -1 20 0 5.2 44.9
 0 -20 0 30.8 26.7
 0 -20 0 -6.1 29.7
 0 20 0 -16 43.6
 -1 -20 0 18.2 31.6
 -1 -20 0 43.2 27.9
 1 20 0 14.2 41.8
 -2 -20 0 21.4 27.7
 -2 -20 0 -6.6 30.8
 2 20 0 -12.7 39.3
 -3 -20 0 -28 30.2
 -3 -20 0 51.29 31.8
 3 20 0 -18.2 38.9
 -4 -20 0 -16.9 30.8
 -4 -20 0 59.49 32.7
 4 20 0 -43.3 36.3
 -5 -20 0 62.59 34.3
 -5 -20 0 25.1 34
 5 20 0 55.89 47.1
 -6 -20 0 -36.4 31.6
 -6 -20 0 26 33.7
 6 20 0 10.1 42.6
 -7 -20 0 -53.29 32.2
 -7 -20 0 13.9 35.2
 7 20 0 8.3 41.7
 -8 -20 0 82.39 39.7
 8 20 0 47.2 45
 2 -21 0 -53.89 27.1
 -2 21 0 -40.5 44.5
 1 -21 0 -50.19 29.7
 1 -21 0 56.49 28.1
 -1 21 0 -28 42.8
 0 -21 0 -50.09 30.7
 0 -21 0 17.3 25.6
 0 21 0 -13.7 45
 -1 -21 0 31.3 28
 -1 -21 0 -30.7 31.1
 1 21 0 -42.9 38.7
 -2 -21 0 99.29 34.4
 -2 -21 0 52.09 36.2
 2 21 0 45.4 43.6
 -3 -21 0 -48 30.8
 -3 -21 0 69.59 33.4
 3 21 0 -11.3 40.1
 -4 -21 0 -39.8 32.8
 -4 -21 0 54.09 34.1
 4 21 0 -4.5 43.9
 -5 -21 0 28.5 33.8
 -5 -21 0 -100.39 30
 5 21 0 -42.1 39.7
 4 21 -1 -1.4 42.8
 -4 -21 1 5.4 30.4
 -4 -21 1 -62.89 32.7
 3 21 -1 1 42.8
 -3 -21 1 61.19 33.3
 -3 -21 1 -30.6 31.3
 2 21 -1 1 42.3
 -2 -21 1 94.49 33.5
 -2 -21 1 3.6 34.1
 1 21 -1 -25 40
 -1 -21 1 -26.7 30.2
 -1 -21 1 89.69 33.2
 0 21 -1 -11.6 42.2
 0 -21 1 -28.9 30.2
 0 -21 1 44.4 29.6
 -1 21 -1 -22.4 42.3
 1 -21 1 53.39 27.8
 1 -21 1 -32.9 28.8
 7 20 -1 26.4 42.8
 -7 -20 1 74.49 38.2
 6 20 -1 -15.1 40.6
 -6 -20 1 43.3 34.6
 -6 -20 1 -38 32.7
 5 20 -1 -4 40.4
 -5 -20 1 -25.7 31.7
 -5 -20 1 23 34.9
 4 20 -1 -19.8 38.2
 -4 -20 1 26.9 32
 -4 -20 1 -15.1 31.3
 3 20 -1 15.5 42.2
 -3 -20 1 100.89 34.4
 -3 -20 1 101.29 35.7
 2 20 -1 -15 37.6
 -2 -20 1 25.7 28.5
 -2 -20 1 -52.19 28.4
 1 20 -1 -32.1 37.3
 -1 -20 1 -4.4 30.9
 -1 -20 1 40.7 28.1
 0 20 -1 -22.4 39
 0 -20 1 31.5 27.6
 0 -20 1 -11.3 29.6
 -1 20 -1 12.8 42.8
 1 -20 1 -20.6 29.8
 1 -20 1 28.1 26.3
 -2 20 -1 -30.5 42.5
 2 -20 1 75.69 38.2
 2 -20 1 4.8 30
 -3 20 -1 -36.7 41.7
 3 -20 1 -4.8 28.5
 -4 20 -1 -22.6 46.2
 4 -20 1 11.9 29.5
 -5 20 -1 -6.7 48.3
[truncated: 1,138,277 more chars]
