# Supplementary material for: Binuclear Nickel Complexes of a New Di(hydroxyphenyl)imidazolate
Source: MDPI journal article supplement (doi:10.3390/magnetochemistry8100132), 2022-10-18
Supplement: s1 [file s1 › [(phen)4Ni2(L)](Cl).cif]

data_niphen

# start Validation Reply Form
_vrf_RINTA01_niphen
;
PROBLEM: The value of Rint is greater than 0.18
RESPONSE: The best avaliable crystal was too smal and had low reflective power.
;
_vrf_PLAT020_niphen
;
PROBLEM: The Value of Rint is Greater Than 0.12 .........      0.199 Report
RESPONSE: The best avaliable crystal was too smal and had low reflective power.
;
_vrf_PLAT094_niphen
;
PROBLEM: Ratio of Maximum / Minimum Residual Density ....       5.08 Report
RESPONSE: The chlorine anion is disordered in two positions, that are too close
to resolve it correctly.
;
# end Validation Reply Form


_audit_creation_date               2022-09-13
_audit_creation_method
;
Olex2 1.5
(compiled 2022.04.07 svn.rca3783a0 for OlexSys, GUI svn.r6498)
;
_shelxl_version_number             2014/6
_audit_contact_author_address      ?
_audit_contact_author_email        ?
_audit_contact_author_name         ''
_audit_contact_author_phone        ?
_publ_contact_author_id_orcid      ?
_publ_section_references
;
Dolomanov, O.V., Bourhis, L.J., Gildea, R.J, Howard, J.A.K. & Puschmann, H.
 (2009), J. Appl. Cryst. 42, 339-341.

Sheldrick, G.M. (2008). Acta Cryst. A64, 112-122.
;
_chemical_name_common              ?
_chemical_name_systematic          ?
_chemical_formula_moiety           'C67 H49 N10 Ni2 O2, Cl, 3(C H4 O)'
_chemical_formula_sum              'C70 H61 Cl N10 Ni2 O5'
_chemical_formula_weight           1275.15
_chemical_melting_point            ?
loop_
  _atom_type_symbol
  _atom_type_description
  _atom_type_scat_dispersion_real
  _atom_type_scat_dispersion_imag
  _atom_type_scat_source
 'C' 'C' 0.0033 0.0016 'International Tables Vol C Tables 4.2.6.8 and 6.1.1.4'
 'H' 'H' 0.0000 0.0000 'International Tables Vol C Tables 4.2.6.8 and 6.1.1.4'
 'Cl' 'Cl' 0.1484 0.1585 'International Tables Vol C Tables 4.2.6.8 and 6.1.1.4'
 'N' 'N' 0.0061 0.0033 'International Tables Vol C Tables 4.2.6.8 and 6.1.1.4'
 'Ni' 'Ni' 0.3393 1.1124 'International Tables Vol C Tables 4.2.6.8 and 6.1.1.4'
 'O' 'O' 0.0106 0.0060 'International Tables Vol C Tables 4.2.6.8 and 6.1.1.4'

_shelx_space_group_comment
;
The symmetry employed for this shelxl refinement is uniquely defined
by the following loop, which should always be used as a source of
symmetry information in preference to the above space-group names.
They are only intended as comments.
;
_space_group_crystal_system        'triclinic'
_space_group_IT_number             2
_space_group_name_H-M_alt          'P -1'
_space_group_name_Hall             '-P 1'
loop_
  _space_group_symop_operation_xyz
 'x, y, z'
 '-x, -y, -z'

_cell_length_a                     12.2327(3)
_cell_length_b                     13.0491(3)
_cell_length_c                     20.7742(5)
_cell_angle_alpha                  72.9350(10)
_cell_angle_beta                   77.2100(10)
_cell_angle_gamma                  89.9820(10)
_cell_volume                       3084.00(13)
_cell_formula_units_Z              2
_cell_measurement_reflns_used      9990
_cell_measurement_temperature      100
_cell_measurement_theta_max        30.67
_cell_measurement_theta_min        2.25
_shelx_estimated_absorpt_T_max     0.870
_shelx_estimated_absorpt_T_min     0.836
_exptl_absorpt_coefficient_mu      0.715
_exptl_absorpt_correction_T_max    0.2657
_exptl_absorpt_correction_T_min    0.2088
_exptl_absorpt_correction_type     multi-scan
_exptl_absorpt_process_details
;
SADABS-2016/2 (Bruker,2016/2) was used for absorption correction.
wR2(int) was 0.1355 before and 0.0459 after correction.
The Ratio of minimum to maximum transmission is 0.8322.
The \l/2 correction factor is Not present.
;
_exptl_absorpt_special_details     ?
_exptl_crystal_colour              red
_exptl_crystal_colour_primary      red
_exptl_crystal_density_diffrn      1.373
_exptl_crystal_density_meas        .
_exptl_crystal_density_method      ?
_exptl_crystal_description         prism
_exptl_crystal_F_000               1328
_exptl_crystal_size_max            0.26
_exptl_crystal_size_mid            0.24
_exptl_crystal_size_min            0.2
_exptl_transmission_factor_max     ?
_exptl_transmission_factor_min     ?
_diffrn_reflns_av_R_equivalents    0.1989
_diffrn_reflns_av_unetI/netI       0.2337
_diffrn_reflns_Laue_measured_fraction_full  0.972
_diffrn_reflns_Laue_measured_fraction_max  0.999
_diffrn_reflns_limit_h_max         14
_diffrn_reflns_limit_h_min         -14
_diffrn_reflns_limit_k_max         15
_diffrn_reflns_limit_k_min         -15
_diffrn_reflns_limit_l_max         24
_diffrn_reflns_limit_l_min         -24
_diffrn_reflns_number              41247
_diffrn_reflns_point_group_measured_fraction_full  0.972
_diffrn_reflns_point_group_measured_fraction_max  0.999
_diffrn_reflns_theta_full          25.242
_diffrn_reflns_theta_max           24.999
_diffrn_reflns_theta_min           2.108
_diffrn_ambient_temperature        100.00
_diffrn_detector_area_resol_mean   ?
_diffrn_measured_fraction_theta_full  0.972
_diffrn_measured_fraction_theta_max  0.999
_diffrn_measurement_device_type    'Bruker Quest D8'
_diffrn_measurement_method         '\f and \w scans'
_diffrn_radiation_type             MoK\a
_diffrn_radiation_wavelength       0.71073
_diffrn_source                     ?
_reflns_Friedel_coverage           0.000
_reflns_Friedel_fraction_full      .
_reflns_Friedel_fraction_max       .
_reflns_number_gt                  5967
_reflns_number_total               10859
_reflns_special_details
;
 Reflections were merged by SHELXL according to the crystal
 class for the calculation of statistics and refinement.
 
 Structure factors included contributions from the .fab file.
 
 _reflns_Friedel_fraction is defined as the number of unique
 Friedel pairs measured divided by the number that would be
 possible theoretically, ignoring centric projections and
 systematic absences.
;
_reflns_threshold_expression       'I > 2\s(I)'
_computing_cell_refinement         ?
_computing_data_collection         ?
_computing_data_reduction          ?
_computing_molecular_graphics      'Olex2 1.5 (Dolomanov et al., 2009)'
_computing_publication_material    'Olex2 1.5 (Dolomanov et al., 2009)'
_computing_structure_refinement    'XL  (Sheldrick, 2008)'
_computing_structure_solution      'SHELXT  (Sheldrick, 2015)'
_refine_diff_density_max           2.109
_refine_diff_density_min           -0.415
_refine_diff_density_rms           0.120
_refine_ls_extinction_coef         .
_refine_ls_extinction_method       none
_refine_ls_goodness_of_fit_ref     1.100
_refine_ls_hydrogen_treatment      constr
_refine_ls_matrix_type             full
_refine_ls_number_parameters       811
_refine_ls_number_reflns           10859
_refine_ls_number_restraints       9
_refine_ls_R_factor_all            0.2209
_refine_ls_R_factor_gt             0.0811
_refine_ls_restrained_S_all        1.100
_refine_ls_shift/su_max            0.000
_refine_ls_shift/su_mean           0.000
_refine_ls_structure_factor_coef   Fsqd
_refine_ls_weighting_details      
 'w=1/[\s^2^(Fo^2^)+(0.1576P)^2^] where P=(Fo^2^+2Fc^2^)/3'
_refine_ls_weighting_scheme        calc
_refine_ls_wR_factor_gt            0.2341
_refine_ls_wR_factor_ref           0.2702
_refine_special_details            ?
_olex2_refinement_description
;
1. Fixed Uiso
 At 1.2 times of:
  All C(H) groups, All C(H,H) groups, All C(H,H,H,H) groups, All O(H) groups
 At 1.5 times of:
  All C(H,H,H) groups
2. Restrained distances
 C19-C18' \\sim C19'-C18
 with sigma of 0.02
 C18'-C16 \\sim C18-C16
 with sigma of 0.02
 C11'-C10 \\sim C11-C10
 with sigma of 0.02
3. Uiso/Uaniso restraints and constraints
Uanis(C11) \\sim Ueq: with sigma of 0.01 and sigma for terminal atoms of 0.02
Uanis(C18) = Uanis(C18')
Uanis(C19) = Uanis(C19')
Uanis(C11') = Uanis(C11)
4. Others
 Sof(C18')=Sof(H18C)=Sof(H18D)=Sof(C19')=Sof(H19D)=Sof(H19E)=Sof(H19F)=1-FVAR(1)
 Sof(C18)=Sof(H18A)=Sof(H18B)=Sof(C19)=Sof(H19A)=Sof(H19B)=Sof(H19C)=FVAR(1)
 Sof(H10C)=Sof(H10D)=Sof(C11')=Sof(H11D)=Sof(H11E)=Sof(H11F)=1-FVAR(2)
 Sof(H10A)=Sof(H10B)=Sof(C11)=Sof(H11A)=Sof(H11B)=Sof(H11C)=FVAR(2)
5.a Riding coordinates:
 O1S(H1S), O2S(H2S), O3S(H3S)
5.b Secondary CH2 refined with riding coordinates:
 C10(H10A,H10B), C10(H10C,H10D), C18(H18A,H18B), C18'(H18C,H18D)
5.c Aromatic/amide H refined with riding coordinates:
 C1(H1), C6(H6), C7(H7), C9(H9), C14(H14), C15(H15), C17(H17), C20(H20),
 C21(H21), C22(H22), C24(H24), C25(H25), C27(H27), C28(H28), C29(H29), C32(H32),
  C33(H33), C34(H34), C36(H36), C37(H37), C39(H39), C40(H40), C41(H41),
 C44(H44), C45(H45), C46(H46), C48(H48), C49(H49), C51(H51), C52(H52), C53(H53),
  C56(H56), C57(H57), C58(H58), C60(H60), C61(H61), C63(H63), C64(H64), C65(H65)
5.d Idealised Me refined as rotating group:
 C11(H11A,H11B,H11C), C19(H19A,H19B,H19C), C11'(H11D,H11E,H11F), C19'(H19D,
 H19E,H19F), C1S(H1SA,H1SB,H1SC), C2S(H2SA,H2SB,H2SC), C3S(H3SA,H3SB,H3SC)
;
_atom_sites_solution_hydrogens     mixed
_atom_sites_solution_primary       ?
_atom_sites_solution_secondary     ?
loop_
  _atom_site_label
  _atom_site_type_symbol
  _atom_site_fract_x
  _atom_site_fract_y
  _atom_site_fract_z
  _atom_site_U_iso_or_equiv
  _atom_site_adp_type
  _atom_site_occupancy
  _atom_site_site_symmetry_order
  _atom_site_calc_flag
  _atom_site_refinement_flags_posn
  _atom_site_refinement_flags_adp
  _atom_site_refinement_flags_occupancy
  _atom_site_disorder_assembly
  _atom_site_disorder_group
 Ni01 Ni 0.25499(8) 0.44824(6) 0.32368(4) 0.0340(3) Uani 1 1 d . . . . .
 Ni02 Ni 0.50619(8) 0.14664(6) 0.17659(3) 0.0351(3) Uani 1 1 d . . . . .
 O1 O 0.3451(4) 0.5905(3) 0.2728(2) 0.0380(11) Uani 1 1 d . . . . .
 O2 O 0.6707(4) 0.1918(3) 0.1643(2) 0.0421(12) Uani 1 1 d . . . . .
 N1 N 0.3809(5) 0.3752(4) 0.2758(2) 0.0335(13) Uani 1 1 d . . . . .
 N2 N 0.4675(5) 0.2746(4) 0.2123(2) 0.0325(12) Uani 1 1 d . . . . .
 N3 N 0.3167(5) 0.4272(4) 0.4118(2) 0.0346(13) Uani 1 1 d . . . . .
 N4 N 0.1378(5) 0.5319(4) 0.3797(2) 0.0363(13) Uani 1 1 d . . . . .
 N5 N 0.1448(5) 0.3069(4) 0.3652(2) 0.0333(12) Uani 1 1 d . . . . .
 N6 N 0.1658(5) 0.4665(4) 0.2473(3) 0.0405(14) Uani 1 1 d . . . . .
 N7 N 0.5088(5) 0.2302(4) 0.0732(2) 0.0412(14) Uani 1 1 d . . . . .
 N8 N 0.5621(5) 0.0286(4) 0.1263(2) 0.0419(15) Uani 1 1 d . . . . .
 N9 N 0.3328(5) 0.0966(4) 0.2032(3) 0.0421(14) Uani 1 1 d . . . . .
 N10 N 0.4917(5) 0.0331(4) 0.2728(2) 0.0354(13) Uani 1 1 d . . . . .
 C1 C 0.3742(6) 0.2872(5) 0.2569(3) 0.0335(15) Uani 1 1 d . . . . .
 H1 H 0.3098 0.2380 0.2733 0.040 Uiso 1 1 calc R U . . .
 C2 C 0.4861(6) 0.4235(5) 0.2420(3) 0.0367(16) Uani 1 1 d . . . . .
 C3 C 0.5397(6) 0.3614(5) 0.2017(3) 0.0337(15) Uani 1 1 d . . . . .
 C4 C 0.5272(6) 0.5199(5) 0.2582(3) 0.0342(15) Uani 1 1 d . . . . .
 C5 C 0.4514(6) 0.5962(5) 0.2741(3) 0.0328(15) Uani 1 1 d . . . . .
 C6 C 0.4968(6) 0.6800(5) 0.2910(3) 0.0417(17) Uani 1 1 d . . . . .
 H6 H 0.4476 0.7313 0.3029 0.050 Uiso 1 1 calc R U . . .
 C7 C 0.6075(6) 0.6936(5) 0.2919(3) 0.0401(16) Uani 1 1 d . . . . .
 H7 H 0.6330 0.7528 0.3038 0.048 Uiso 1 1 calc R U . . .
 C8 C 0.6845(7) 0.6179(6) 0.2746(3) 0.0453(18) Uani 1 1 d . . . . .
 C9 C 0.6398(6) 0.5314(5) 0.2596(3) 0.0375(16) Uani 1 1 d . . . . .
 H9 H 0.6882 0.4781 0.2500 0.045 Uiso 1 1 calc R U . . .
 C10 C 0.8066(7) 0.6304(6) 0.2741(4) 0.053(2) Uani 1 1 d D . . . .
 H10A H 0.8140 0.6666 0.3088 0.064 Uiso 0.68(2) 1 calc R U P A 1
 H10B H 0.8351 0.5581 0.2884 0.064 Uiso 0.68(2) 1 calc R U P A 1
 H10C H 0.8468 0.5712 0.2608 0.064 Uiso 0.32(2) 1 calc R U P A 2
 H10D H 0.8151 0.6275 0.3209 0.064 Uiso 0.32(2) 1 calc R U P A 2
 C12 C 0.6468(6) 0.3799(5) 0.1501(3) 0.0370(16) Uani 1 1 d . . . . .
 C13 C 0.7072(6) 0.2947(5) 0.1321(3) 0.0362(16) Uani 1 1 d . . . . .
 C14 C 0.8040(7) 0.3221(6) 0.0801(3) 0.0448(18) Uani 1 1 d . . . . .
 H14 H 0.8442 0.2667 0.0664 0.054 Uiso 1 1 calc R U . . .
 C15 C 0.8436(7) 0.4264(6) 0.0478(3) 0.0466(18) Uani 1 1 d . . . . .
 H15 H 0.9104 0.4415 0.0121 0.056 Uiso 1 1 calc R U . . .
 C16 C 0.7900(7) 0.5103(6) 0.0652(3) 0.0474(19) Uani 1 1 d D . . . .
 C17 C 0.6932(6) 0.4859(5) 0.1153(3) 0.0421(17) Uani 1 1 d . . . . .
 H17 H 0.6548 0.5433 0.1275 0.050 Uiso 1 1 calc R U . . .
 C20 C 0.4026(7) 0.3727(5) 0.4279(3) 0.0451(18) Uani 1 1 d . . . . .
 H20 H 0.4412 0.3358 0.3974 0.054 Uiso 1 1 calc R U . . .
 C21 C 0.4398(8) 0.3669(6) 0.4881(4) 0.060(2) Uani 1 1 d . . . . .
 H21 H 0.4994 0.3238 0.4995 0.072 Uiso 1 1 calc R U . . .
 C22 C 0.3874(7) 0.4253(6) 0.5301(3) 0.054(2) Uani 1 1 d . . . . .
 H22 H 0.4110 0.4226 0.5712 0.065 Uiso 1 1 calc R U . . .
 C23 C 0.2993(7) 0.4890(6) 0.5126(3) 0.0465(19) Uani 1 1 d . . . . .
 C24 C 0.2436(7) 0.5551(6) 0.5515(4) 0.0488(19) Uani 1 1 d . . . . .
 H24 H 0.2672 0.5585 0.5915 0.059 Uiso 1 1 calc R U . . .
 C25 C 0.1608(7) 0.6111(6) 0.5336(3) 0.051(2) Uani 1 1 d . . . . .
 H25 H 0.1282 0.6568 0.5597 0.061 Uiso 1 1 calc R U . . .
 C26 C 0.1170(7) 0.6059(5) 0.4751(3) 0.0437(18) Uani 1 1 d . . . . .
 C27 C 0.0242(7) 0.6592(5) 0.4549(4) 0.0475(19) Uani 1 1 d . . . . .
 H27 H -0.0145 0.7040 0.4798 0.057 Uiso 1 1 calc R U . . .
 C28 C -0.0089(6) 0.6462(5) 0.4007(3) 0.0451(18) Uani 1 1 d . . . . .
 H28 H -0.0730 0.6797 0.3878 0.054 Uiso 1 1 calc R U . . .
 C29 C 0.0513(6) 0.5830(5) 0.3630(3) 0.0398(16) Uani 1 1 d . . . . .
 H29 H 0.0281 0.5769 0.3235 0.048 Uiso 1 1 calc R U . . .
 C30 C 0.1722(6) 0.5416(5) 0.4350(3) 0.0355(16) Uani 1 1 d . . . . .
 C31 C 0.2648(6) 0.4856(5) 0.4532(3) 0.0381(16) Uani 1 1 d . . . . .
 C32 C 0.1388(6) 0.2261(5) 0.4230(3) 0.0412(17) Uani 1 1 d . . . . .
 H32 H 0.1900 0.2286 0.4510 0.049 Uiso 1 1 calc R U . . .
 C33 C 0.0618(6) 0.1396(5) 0.4439(3) 0.0449(18) Uani 1 1 d . . . . .
 H33 H 0.0607 0.0830 0.4851 0.054 Uiso 1 1 calc R U . . .
 C34 C -0.0140(7) 0.1360(6) 0.4044(3) 0.0486(19) Uani 1 1 d . . . . .
 H34 H -0.0689 0.0773 0.4189 0.058 Uiso 1 1 calc R U . . .
 C35 C -0.0105(7) 0.2183(6) 0.3429(4) 0.0483(19) Uani 1 1 d . . . . .
 C36 C -0.0859(8) 0.2209(7) 0.2979(4) 0.057(2) Uani 1 1 d . . . . .
 H36 H -0.1422 0.1642 0.3097 0.068 Uiso 1 1 calc R U . . .
 C37 C -0.0767(7) 0.3034(6) 0.2390(4) 0.0503(19) Uani 1 1 d . . . . .
 H37 H -0.1288 0.3053 0.2110 0.060 Uiso 1 1 calc R U . . .
 C38 C 0.0104(7) 0.3881(6) 0.2183(4) 0.0485(19) Uani 1 1 d . . . . .
 C39 C 0.0244(9) 0.4748(7) 0.1578(4) 0.069(3) Uani 1 1 d . . . . .
 H39 H -0.0252 0.4797 0.1278 0.083 Uiso 1 1 calc R U . . .
 C40 C 0.1093(9) 0.5524(6) 0.1418(3) 0.065(3) Uani 1 1 d . . . . .
 H40 H 0.1199 0.6110 0.1006 0.078 Uiso 1 1 calc R U . . .
 C41 C 0.1808(7) 0.5440(6) 0.1876(3) 0.049(2) Uani 1 1 d . . . . .
 H41 H 0.2423 0.5960 0.1751 0.059 Uiso 1 1 calc R U . . .
 C42 C 0.0819(6) 0.3897(5) 0.2619(3) 0.0381(16) Uani 1 1 d . . . . .
 C43 C 0.0719(7) 0.3029(5) 0.3254(3) 0.0408(17) Uani 1 1 d . . . . .
 C44 C 0.4797(7) 0.3285(5) 0.0482(3) 0.0446(18) Uani 1 1 d . . . . .
 H44 H 0.4486 0.3672 0.0794 0.054 Uiso 1 1 calc R U . . .
 C45 C 0.4932(7) 0.3779(6) -0.0232(4) 0.054(2) Uani 1 1 d . . . . .
 H45 H 0.4676 0.4474 -0.0394 0.065 Uiso 1 1 calc R U . . .
 C46 C 0.5431(8) 0.3265(6) -0.0697(3) 0.059(2) Uani 1 1 d . . . . .
 H46 H 0.5555 0.3608 -0.1181 0.071 Uiso 1 1 calc R U . . .
 C47 C 0.5745(7) 0.2242(6) -0.0445(3) 0.050(2) Uani 1 1 d . . . . .
 C48 C 0.6262(9) 0.1604(7) -0.0872(4) 0.075(3) Uani 1 1 d . . . . .
 H48 H 0.6401 0.1897 -0.1361 0.090 Uiso 1 1 calc R U . . .
 C49 C 0.6548(10) 0.0621(7) -0.0604(4) 0.080(3) Uani 1 1 d . . . . .
 H49 H 0.6905 0.0242 -0.0910 0.096 Uiso 1 1 calc R U . . .
 C50 C 0.6348(10) 0.0099(7) 0.0123(4) 0.075(3) Uani 1 1 d . . . . .
 C51 C 0.6627(10) -0.0945(7) 0.0439(4) 0.081(3) Uani 1 1 d . . . . .
 H51 H 0.7019 -0.1356 0.0164 0.097 Uiso 1 1 calc R U . . .
 C52 C 0.6333(9) -0.1366(6) 0.1142(4) 0.066(3) Uani 1 1 d . . . . .
 H52 H 0.6467 -0.2089 0.1358 0.079 Uiso 1 1 calc R U . . .
 C53 C 0.5837(7) -0.0723(5) 0.1534(4) 0.0465(18) Uani 1 1 d . . . . .
 H53 H 0.5642 -0.1022 0.2024 0.056 Uiso 1 1 calc R U . . .
 C54 C 0.5848(7) 0.0700(6) 0.0563(3) 0.0460(19) Uani 1 1 d . . . . .
 C55 C 0.5575(7) 0.1769(5) 0.0278(3) 0.0434(18) Uani 1 1 d . . . . .
 C56 C 0.2533(7) 0.1323(6) 0.1696(3) 0.048(2) Uani 1 1 d . . . . .
 H56 H 0.2749 0.1806 0.1241 0.058 Uiso 1 1 calc R U . . .
 C57 C 0.1403(7) 0.1023(7) 0.1980(4) 0.058(2) Uani 1 1 d . . . . .
 H57 H 0.0864 0.1283 0.1716 0.069 Uiso 1 1 calc R U . . .
 C58 C 0.1064(8) 0.0356(6) 0.2638(4) 0.056(2) Uani 1 1 d . . . . .
 H58 H 0.0290 0.0160 0.2842 0.067 Uiso 1 1 calc R U . . .
 C59 C 0.1886(6) -0.0038(6) 0.3011(3) 0.0406(16) Uani 1 1 d . . . . .
 C60 C 0.1611(8) -0.0802(6) 0.3698(4) 0.056(2) Uani 1 1 d . . . . .
 H60 H 0.0850 -0.1052 0.3912 0.067 Uiso 1 1 calc R U . . .
 C61 C 0.2414(7) -0.1161(6) 0.4036(3) 0.0486(19) Uani 1 1 d . . . . .
 H61 H 0.2212 -0.1633 0.4495 0.058 Uiso 1 1 calc R U . . .
 C62 C 0.3569(7) -0.0844(5) 0.3715(3) 0.0446(18) Uani 1 1 d . . . . .
 C63 C 0.4463(7) -0.1191(5) 0.4024(3) 0.049(2) Uani 1 1 d . . . . .
 H63 H 0.4322 -0.1704 0.4471 0.058 Uiso 1 1 calc R U . . .
 C64 C 0.5519(7) -0.0806(6) 0.3695(3) 0.0434(17) Uani 1 1 d . . . . .
 H64 H 0.6125 -0.1065 0.3901 0.052 Uiso 1 1 calc R U . . .
 C65 C 0.5726(6) -0.0032(5) 0.3057(3) 0.0394(17) Uani 1 1 d . . . . .
 H65 H 0.6477 0.0254 0.2842 0.047 Uiso 1 1 calc R U . . .
 C66 C 0.3859(7) -0.0069(5) 0.3048(3) 0.0419(17) Uani 1 1 d . . . . .
 C67 C 0.2984(6) 0.0281(5) 0.2689(3) 0.0384(16) Uani 1 1 d . . . . .
 C11 C 0.8783(11) 0.6929(15) 0.2056(6) 0.060(4) Uani 0.68(2) 1 d D U P A 1
 H11A H 0.8459 0.7616 0.1885 0.090 Uiso 0.68(2) 1 calc R U P A 1
 H11B H 0.8816 0.6519 0.1726 0.090 Uiso 0.68(2) 1 calc R U P A 1
 H11C H 0.9542 0.7064 0.2107 0.090 Uiso 0.68(2) 1 calc R U P A 1
 C18 C 0.8398(10) 0.6283(8) 0.0341(5) 0.049(3) Uani 0.736(11) 1 d D . P B 1
 H18A H 0.7923 0.6739 0.0579 0.059 Uiso 0.736(11) 1 calc R U P B 1
 H18B H 0.9159 0.6328 0.0427 0.059 Uiso 0.736(11) 1 calc R U P B 1
 C19 C 0.8470(12) 0.6701(9) -0.0408(5) 0.070(4) Uani 0.736(11) 1 d D . P B 1
 H19A H 0.8859 0.7419 -0.0590 0.105 Uiso 0.736(11) 1 calc R U P B 1
 H19B H 0.7712 0.6742 -0.0492 0.105 Uiso 0.736(11) 1 calc R U P B 1
 H19C H 0.8889 0.6219 -0.0642 0.105 Uiso 0.736(11) 1 calc R U P B 1
 C11' C 0.856(3) 0.738(2) 0.2224(16) 0.060(4) Uani 0.32(2) 1 d D . P A 2
 H11D H 0.9384 0.7414 0.2149 0.090 Uiso 0.32(2) 1 calc R U P A 2
 H11E H 0.8270 0.7966 0.2406 0.090 Uiso 0.32(2) 1 calc R U P A 2
 H11F H 0.8355 0.7460 0.1783 0.090 Uiso 0.32(2) 1 calc R U P A 2
 C18' C 0.815(3) 0.6202(18) 0.0056(12) 0.049(3) Uani 0.264(11) 1 d D . P B 2
 H18C H 0.7449 0.6510 -0.0058 0.059 Uiso 0.264(11) 1 calc R U P B 2
 H18D H 0.8663 0.6135 -0.0368 0.059 Uiso 0.264(11) 1 calc R U P B 2
 C19' C 0.873(3) 0.688(2) 0.0435(15) 0.070(4) Uani 0.264(11) 1 d D . P B 2
 H19D H 0.8932 0.7620 0.0129 0.105 Uiso 0.264(11) 1 calc R U P B 2
 H19E H 0.9415 0.6549 0.0543 0.105 Uiso 0.264(11) 1 calc R U P B 2
 H19F H 0.8211 0.6897 0.0864 0.105 Uiso 0.264(11) 1 calc R U P B 2
 Cl03 Cl 0.15671(12) 0.11592(11) 0.60790(6) 0.0259(3) Uani 1 1 d . . . . .
 O1S O 0.3090(5) -0.0055(4) 0.5214(3) 0.0648(16) Uani 1 1 d . . . . .
 H1S H 0.2567 0.0320 0.5529 0.078 Uiso 1 1 d R U . . .
 C1S C 0.3765(7) 0.0789(6) 0.4706(4) 0.053(2) Uani 1 1 d . . . . .
 H1SA H 0.3514 0.0928 0.4273 0.079 Uiso 1 1 calc R U . . .
 H1SB H 0.4548 0.0598 0.4630 0.079 Uiso 1 1 calc R U . . .
 H1SC H 0.3707 0.1436 0.4856 0.079 Uiso 1 1 calc R U . . .
 O2S O 0.6505(5) 0.2134(4) 0.4204(3) 0.0663(17) Uani 1 1 d . . . . .
 H2S H 0.6581 0.1382 0.4516 0.080 Uiso 1 1 d R U . . .
 C2S C 0.6251(7) 0.2306(7) 0.3543(3) 0.057(2) Uani 1 1 d . . . . .
 H2SA H 0.5483 0.2016 0.3605 0.085 Uiso 1 1 calc R U . . .
 H2SB H 0.6781 0.1943 0.3270 0.085 Uiso 1 1 calc R U . . .
 H2SC H 0.6316 0.3078 0.3299 0.085 Uiso 1 1 calc R U . . .
 O3S O 0.2672(5) 0.7879(4) 0.2527(3) 0.0586(15) Uani 1 1 d . . . . .
 H3S H 0.2941 0.7127 0.2699 0.070 Uiso 1 1 d R U . . .
 C3S C 0.1672(9) 0.7982(7) 0.2342(5) 0.079(3) Uani 1 1 d . . . . .
 H3SA H 0.1679 0.8687 0.2001 0.118 Uiso 1 1 calc R U . . .
 H3SB H 0.1066 0.7920 0.2751 0.118 Uiso 1 1 calc R U . . .
 H3SC H 0.1548 0.7415 0.2138 0.118 Uiso 1 1 calc R U . . .

loop_
  _atom_site_aniso_label
  _atom_site_aniso_U_11
  _atom_site_aniso_U_22
  _atom_site_aniso_U_33
  _atom_site_aniso_U_23
  _atom_site_aniso_U_13
  _atom_site_aniso_U_12
 Ni01 0.0355(6) 0.0318(5) 0.0360(4) -0.0150(3) -0.0043(4) 0.0036(4)
 Ni02 0.0429(6) 0.0317(5) 0.0310(4) -0.0130(3) -0.0043(4) 0.0053(4)
 O1 0.039(3) 0.031(2) 0.045(2) -0.0176(17) -0.003(2) 0.009(2)
 O2 0.046(3) 0.039(3) 0.039(2) -0.0151(17) 0.000(2) 0.011(2)
 N1 0.028(3) 0.029(3) 0.041(2) -0.011(2) -0.001(2) 0.001(2)
 N2 0.034(4) 0.028(3) 0.039(2) -0.0161(19) -0.005(2) 0.005(2)
 N3 0.034(4) 0.030(3) 0.043(3) -0.015(2) -0.009(3) 0.002(3)
 N4 0.029(3) 0.040(3) 0.040(2) -0.018(2) 0.002(2) 0.002(3)
 N5 0.027(3) 0.037(3) 0.035(2) -0.018(2) 0.003(2) 0.003(2)
 N6 0.051(4) 0.036(3) 0.039(2) -0.020(2) -0.009(3) 0.004(3)
 N7 0.047(4) 0.038(3) 0.037(3) -0.007(2) -0.011(3) 0.005(3)
 N8 0.048(4) 0.042(3) 0.034(2) -0.014(2) -0.004(3) 0.003(3)
 N9 0.050(4) 0.039(3) 0.043(3) -0.022(2) -0.008(3) 0.008(3)
 N10 0.042(4) 0.026(3) 0.038(2) -0.0135(19) -0.005(3) 0.002(3)
 C1 0.036(4) 0.027(3) 0.039(3) -0.018(2) -0.002(3) 0.005(3)
 C2 0.039(5) 0.031(4) 0.041(3) -0.012(2) -0.007(3) 0.004(3)
 C3 0.031(4) 0.033(4) 0.038(3) -0.015(2) -0.003(3) 0.012(3)
 C4 0.038(4) 0.028(3) 0.036(3) -0.012(2) -0.003(3) 0.008(3)
 C5 0.030(4) 0.030(4) 0.037(3) -0.011(2) -0.004(3) -0.004(3)
 C6 0.047(5) 0.034(4) 0.046(3) -0.015(3) -0.010(3) 0.015(3)
 C7 0.038(5) 0.035(4) 0.050(3) -0.019(3) -0.009(3) 0.003(3)
 C8 0.051(5) 0.043(4) 0.042(3) -0.011(3) -0.012(3) -0.002(4)
 C9 0.036(4) 0.038(4) 0.040(3) -0.013(2) -0.010(3) 0.005(3)
 C10 0.049(6) 0.061(5) 0.061(4) -0.035(3) -0.011(4) -0.001(4)
 C12 0.041(5) 0.038(4) 0.031(3) -0.012(2) -0.004(3) 0.004(3)
 C13 0.038(4) 0.043(4) 0.029(3) -0.015(2) -0.005(3) 0.004(3)
 C14 0.054(5) 0.050(4) 0.033(3) -0.020(3) -0.005(3) 0.013(4)
 C15 0.043(5) 0.050(5) 0.044(3) -0.014(3) -0.005(3) 0.002(4)
 C16 0.042(5) 0.044(4) 0.045(3) -0.009(3) 0.007(3) -0.007(4)
 C17 0.044(5) 0.034(4) 0.045(3) -0.011(3) -0.007(3) 0.003(3)
 C20 0.051(5) 0.036(4) 0.054(3) -0.015(3) -0.019(4) 0.004(3)
 C21 0.069(7) 0.056(5) 0.058(4) -0.009(3) -0.031(4) -0.003(4)
 C22 0.055(6) 0.064(5) 0.044(3) -0.014(3) -0.015(4) -0.003(4)
 C23 0.055(5) 0.045(4) 0.038(3) -0.016(3) -0.002(3) -0.011(4)
 C24 0.049(5) 0.050(5) 0.049(3) -0.023(3) -0.004(4) -0.005(4)
 C25 0.066(6) 0.041(4) 0.046(3) -0.027(3) 0.005(4) -0.013(4)
 C26 0.044(5) 0.039(4) 0.042(3) -0.017(3) 0.008(3) -0.008(3)
 C27 0.047(5) 0.038(4) 0.055(4) -0.025(3) 0.009(4) 0.001(4)
 C28 0.035(5) 0.040(4) 0.058(4) -0.015(3) -0.004(3) 0.009(3)
 C29 0.033(4) 0.034(4) 0.049(3) -0.015(3) 0.000(3) 0.004(3)
 C30 0.042(5) 0.031(4) 0.036(3) -0.019(2) -0.003(3) 0.004(3)
 C31 0.041(5) 0.027(4) 0.038(3) -0.008(2) 0.006(3) -0.011(3)
 C32 0.035(4) 0.045(4) 0.045(3) -0.020(3) -0.005(3) 0.002(3)
 C33 0.043(5) 0.040(4) 0.042(3) -0.009(3) 0.005(3) -0.011(3)
 C34 0.050(5) 0.037(4) 0.053(4) -0.012(3) -0.002(4) -0.017(4)
 C35 0.052(5) 0.042(4) 0.054(4) -0.025(3) -0.005(4) 0.000(4)
 C36 0.055(6) 0.058(5) 0.063(4) -0.025(3) -0.017(4) 0.000(4)
 C37 0.041(5) 0.063(5) 0.060(4) -0.031(3) -0.020(4) 0.013(4)
 C38 0.055(6) 0.049(5) 0.055(4) -0.028(3) -0.024(4) 0.014(4)
 C39 0.092(8) 0.063(6) 0.057(4) -0.012(4) -0.039(5) 0.000(5)
 C40 0.098(8) 0.053(5) 0.039(3) -0.004(3) -0.018(4) -0.002(5)
 C41 0.065(6) 0.043(4) 0.039(3) -0.015(3) -0.010(3) 0.001(4)
 C42 0.032(4) 0.040(4) 0.045(3) -0.021(3) -0.005(3) 0.010(3)
 C43 0.048(5) 0.037(4) 0.046(3) -0.025(3) -0.011(3) 0.003(3)
 C44 0.054(5) 0.043(4) 0.042(3) -0.017(3) -0.014(3) 0.014(4)
 C45 0.077(7) 0.039(4) 0.051(4) -0.005(3) -0.032(4) 0.006(4)
 C46 0.086(7) 0.056(5) 0.035(3) -0.010(3) -0.016(4) 0.003(4)
 C47 0.063(6) 0.049(5) 0.034(3) -0.015(3) 0.001(3) -0.001(4)
 C48 0.120(9) 0.069(6) 0.035(3) -0.019(3) -0.006(4) 0.005(6)
 C49 0.124(10) 0.067(6) 0.042(4) -0.026(3) 0.011(5) 0.024(6)
 C50 0.123(10) 0.048(5) 0.048(4) -0.024(3) 0.006(5) 0.019(5)
 C51 0.137(10) 0.052(5) 0.058(4) -0.035(4) -0.010(6) 0.036(6)
 C52 0.096(8) 0.038(5) 0.062(4) -0.018(3) -0.013(5) 0.011(5)
 C53 0.047(5) 0.035(4) 0.052(4) -0.011(3) -0.003(4) 0.006(3)
 C54 0.049(5) 0.051(5) 0.037(3) -0.019(3) -0.001(3) 0.016(4)
 C55 0.053(5) 0.041(4) 0.033(3) -0.015(3) 0.001(3) -0.002(3)
 C56 0.061(6) 0.044(4) 0.050(3) -0.020(3) -0.025(4) 0.024(4)
 C57 0.041(6) 0.067(6) 0.079(5) -0.033(4) -0.027(4) 0.019(4)
 C58 0.061(6) 0.056(5) 0.055(4) -0.023(3) -0.014(4) -0.001(4)
 C59 0.032(4) 0.047(4) 0.051(3) -0.028(3) -0.009(3) 0.000(3)
 C60 0.055(6) 0.042(4) 0.056(4) -0.010(3) 0.011(4) -0.013(4)
 C61 0.048(5) 0.044(4) 0.044(3) -0.005(3) -0.002(3) -0.008(4)
 C62 0.051(5) 0.040(4) 0.042(3) -0.011(3) -0.009(3) -0.010(4)
 C63 0.065(6) 0.038(4) 0.044(3) -0.009(3) -0.019(4) 0.013(4)
 C64 0.045(5) 0.047(4) 0.043(3) -0.018(3) -0.013(3) 0.009(4)
 C65 0.044(5) 0.043(4) 0.037(3) -0.020(3) -0.009(3) 0.011(3)
 C66 0.054(5) 0.034(4) 0.036(3) -0.012(2) -0.006(3) -0.004(3)
 C67 0.046(5) 0.033(4) 0.038(3) -0.015(2) -0.005(3) -0.001(3)
 C11 0.021(6) 0.086(10) 0.074(7) -0.031(6) -0.003(5) 0.011(6)
 C18 0.054(7) 0.048(6) 0.043(5) -0.018(4) 0.001(5) -0.007(5)
 C19 0.084(10) 0.058(7) 0.053(5) 0.001(4) -0.011(6) 0.001(6)
 C11' 0.021(6) 0.086(10) 0.074(7) -0.031(6) -0.003(5) 0.011(6)
 C18' 0.054(7) 0.048(6) 0.043(5) -0.018(4) 0.001(5) -0.007(5)
 C19' 0.084(10) 0.058(7) 0.053(5) 0.001(4) -0.011(6) 0.001(6)
 Cl03 0.0134(8) 0.0277(8) 0.0376(6) -0.0152(5) -0.0004(5) 0.0053(6)
 O1S 0.078(5) 0.051(3) 0.062(3) -0.015(2) -0.011(3) 0.000(3)
 C1S 0.058(6) 0.047(5) 0.058(4) -0.019(3) -0.018(4) 0.009(4)
 O2S 0.087(5) 0.058(4) 0.055(3) -0.016(2) -0.020(3) 0.003(3)
 C2S 0.052(6) 0.068(5) 0.046(4) -0.015(3) -0.006(4) 0.004(4)
 O3S 0.059(4) 0.053(3) 0.063(3) -0.013(2) -0.019(3) 0.005(3)
 C3S 0.097(9) 0.066(6) 0.069(5) -0.010(4) -0.024(6) 0.002(6)

_geom_special_details
;
 All esds (except the esd in the dihedral angle between two l.s. planes)
 are estimated using the full covariance matrix.  The cell esds are taken
 into account individually in the estimation of esds in distances, angles
 and torsion angles; correlations between esds in cell parameters are only
 used when they are defined by crystal symmetry.  An approximate (isotropic)
 treatment of cell esds is used for estimating esds involving l.s. planes.
;
loop_
  _geom_bond_atom_site_label_1
  _geom_bond_atom_site_label_2
  _geom_bond_distance
  _geom_bond_site_symmetry_2
  _geom_bond_publ_flag
 Ni01 O1 2.027(4) . ?
 Ni01 N1 2.037(6) . ?
 Ni01 N3 2.078(5) . ?
 Ni01 N4 2.146(6) . ?
 Ni01 N5 2.126(5) . ?
 Ni01 N6 2.076(5) . ?
 Ni02 O2 2.037(5) . ?
 Ni02 N2 2.033(5) . ?
 Ni02 N7 2.098(4) . ?
 Ni02 N8 2.135(6) . ?
 Ni02 N9 2.122(6) . ?
 Ni02 N10 2.080(5) . ?
 O1 C5 1.309(8) . ?
 O2 C13 1.338(8) . ?
 N1 C1 1.326(8) . ?
 N1 C2 1.373(8) . ?
 N2 C1 1.346(8) . ?
 N2 C3 1.371(8) . ?
 N3 C20 1.318(9) . ?
 N3 C31 1.366(9) . ?
 N4 C29 1.307(8) . ?
 N4 C30 1.347(8) . ?
 N5 C32 1.334(7) . ?
 N5 C43 1.352(8) . ?
 N6 C41 1.325(7) . ?
 N6 C42 1.354(9) . ?
 N7 C44 1.315(8) . ?
 N7 C55 1.365(9) . ?
 N8 C53 1.324(8) . ?
 N8 C54 1.358(7) . ?
 N9 C56 1.326(8) . ?
 N9 C67 1.367(7) . ?
 N10 C65 1.334(8) . ?
 N10 C66 1.343(9) . ?
 C1 H1 0.9500 . ?
 C2 C3 1.394(9) . ?
 C2 C4 1.507(9) . ?
 C3 C12 1.466(9) . ?
 C4 C5 1.419(9) . ?
 C4 C9 1.393(9) . ?
 C5 C6 1.394(9) . ?
 C6 H6 0.9500 . ?
 C6 C7 1.371(10) . ?
 C7 H7 0.9500 . ?
 C7 C8 1.432(10) . ?
 C8 C9 1.397(10) . ?
 C8 C10 1.500(11) . ?
 C9 H9 0.9500 . ?
 C10 H10A 0.9900 . ?
 C10 H10B 0.9900 . ?
 C10 H10C 0.9900 . ?
 C10 H10D 0.9900 . ?
 C10 C11 1.492(12) . ?
 C10 C11' 1.526(18) . ?
 C12 C13 1.429(10) . ?
 C12 C17 1.412(9) . ?
 C13 C14 1.380(9) . ?
 C14 H14 0.9500 . ?
 C14 C15 1.363(10) . ?
 C15 H15 0.9500 . ?
 C15 C16 1.374(11) . ?
 C16 C17 1.359(10) . ?
 C16 C18 1.550(11) . ?
 C16 C18' 1.572(17) . ?
 C17 H17 0.9500 . ?
 C20 H20 0.9500 . ?
 C20 C21 1.404(9) . ?
 C21 H21 0.9500 . ?
 C21 C22 1.377(12) . ?
 C22 H22 0.9500 . ?
 C22 C23 1.408(11) . ?
 C23 C24 1.423(10) . ?
 C23 C31 1.402(9) . ?
 C24 H24 0.9500 . ?
 C24 C25 1.307(11) . ?
 C25 H25 0.9500 . ?
 C25 C26 1.451(10) . ?
 C26 C27 1.409(10) . ?
 C26 C30 1.419(9) . ?
 C27 H27 0.9500 . ?
 C27 C28 1.331(10) . ?
 C28 H28 0.9500 . ?
 C28 C29 1.400(10) . ?
 C29 H29 0.9500 . ?
 C30 C31 1.410(10) . ?
 C32 H32 0.9500 . ?
 C32 C33 1.372(9) . ?
 C33 H33 0.9500 . ?
 C33 C34 1.377(10) . ?
 C34 H34 0.9500 . ?
 C34 C35 1.399(9) . ?
 C35 C36 1.445(10) . ?
 C35 C43 1.404(10) . ?
 C36 H36 0.9500 . ?
 C36 C37 1.354(10) . ?
 C37 H37 0.9500 . ?
 C37 C38 1.436(11) . ?
 C38 C39 1.400(9) . ?
 C38 C42 1.395(9) . ?
 C39 H39 0.9500 . ?
 C39 C40 1.365(12) . ?
 C40 H40 0.9500 . ?
 C40 C41 1.411(10) . ?
 C41 H41 0.9500 . ?
 C42 C43 1.446(8) . ?
 C44 H44 0.9500 . ?
 C44 C45 1.406(8) . ?
 C45 H45 0.9500 . ?
 C45 C46 1.368(11) . ?
 C46 H46 0.9500 . ?
 C46 C47 1.373(10) . ?
 C47 C48 1.437(11) . ?
 C47 C55 1.413(8) . ?
 C48 H48 0.9500 . ?
 C48 C49 1.320(11) . ?
 C49 H49 0.9500 . ?
 C49 C50 1.426(10) . ?
 C50 C51 1.407(11) . ?
 C50 C54 1.414(10) . ?
 C51 H51 0.9500 . ?
 C51 C52 1.363(10) . ?
 C52 H52 0.9500 . ?
 C52 C53 1.386(11) . ?
 C53 H53 0.9500 . ?
 C54 C55 1.418(10) . ?
 C56 H56 0.9500 . ?
 C56 C57 1.385(11) . ?
 C57 H57 0.9500 . ?
 C57 C58 1.359(11) . ?
 C58 H58 0.9500 . ?
 C58 C59 1.408(10) . ?
 C59 C60 1.449(9) . ?
 C59 C67 1.365(10) . ?
 C60 H60 0.9500 . ?
 C60 C61 1.336(10) . ?
 C61 H61 0.9500 . ?
 C61 C62 1.426(10) . ?
 C62 C63 1.398(9) . ?
 C62 C66 1.425(8) . ?
 C63 H63 0.9500 . ?
 C63 C64 1.340(10) . ?
 C64 H64 0.9500 . ?
 C64 C65 1.382(8) . ?
 C65 H65 0.9500 . ?
 C66 C67 1.437(9) . ?
 C11 H11A 0.9800 . ?
 C11 H11B 0.9800 . ?
 C11 H11C 0.9800 . ?
 C18 H18A 0.9900 . ?
 C18 H18B 0.9900 . ?
 C18 C19 1.474(13) . ?
 C19 H19A 0.9800 . ?
 C19 H19B 0.9800 . ?
 C19 H19C 0.9800 . ?
 C11' H11D 0.9800 . ?
 C11' H11E 0.9800 . ?
 C11' H11F 0.9800 . ?
 C18' H18C 0.9900 . ?
 C18' H18D 0.9900 . ?
 C18' C19' 1.61(4) . ?
 C19' H19D 0.9800 . ?
 C19' H19E 0.9800 . ?
 C19' H19F 0.9800 . ?
 O1S H1S 1.0384 . ?
 O1S C1S 1.394(8) . ?
 C1S H1SA 0.9800 . ?
 C1S H1SB 0.9800 . ?
 C1S H1SC 0.9800 . ?
 O2S H2S 1.0223 . ?
 O2S C2S 1.429(8) . ?
 C2S H2SA 0.9800 . ?
 C2S H2SB 0.9800 . ?
 C2S H2SC 0.9800 . ?
 O3S H3S 1.0226 . ?
 O3S C3S 1.357(11) . ?
 C3S H3SA 0.9800 . ?
 C3S H3SB 0.9800 . ?
 C3S H3SC 0.9800 . ?

loop_
  _geom_angle_atom_site_label_1
  _geom_angle_atom_site_label_2
  _geom_angle_atom_site_label_3
  _geom_angle
  _geom_angle_site_symmetry_1
  _geom_angle_site_symmetry_3
  _geom_angle_publ_flag
 O1 Ni01 N1 88.15(19) . . ?
 O1 Ni01 N3 93.54(19) . . ?
 O1 Ni01 N4 88.30(19) . . ?
 O1 Ni01 N5 170.88(19) . . ?
 O1 Ni01 N6 92.1(2) . . ?
 N1 Ni01 N3 95.0(2) . . ?
 N1 Ni01 N4 172.8(2) . . ?
 N1 Ni01 N5 93.8(2) . . ?
 N1 Ni01 N6 93.5(2) . . ?
 N3 Ni01 N4 79.0(2) . . ?
 N3 Ni01 N5 95.15(19) . . ?
 N5 Ni01 N4 90.7(2) . . ?
 N6 Ni01 N3 169.9(2) . . ?
 N6 Ni01 N4 92.9(2) . . ?
 N6 Ni01 N5 78.9(2) . . ?
 O2 Ni02 N7 92.1(2) . . ?
 O2 Ni02 N8 87.8(2) . . ?
 O2 Ni02 N9 172.65(18) . . ?
 O2 Ni02 N10 95.2(2) . . ?
 N2 Ni02 O2 87.2(2) . . ?
 N2 Ni02 N7 95.0(2) . . ?
 N2 Ni02 N8 171.7(2) . . ?
 N2 Ni02 N9 89.4(2) . . ?
 N2 Ni02 N10 96.63(19) . . ?
 N7 Ni02 N8 78.5(2) . . ?
 N7 Ni02 N9 94.7(2) . . ?
 N9 Ni02 N8 96.3(2) . . ?
 N10 Ni02 N7 166.5(2) . . ?
 N10 Ni02 N8 90.43(19) . . ?
 N10 Ni02 N9 78.7(2) . . ?
 C5 O1 Ni01 117.8(4) . . ?
 C13 O2 Ni02 119.0(4) . . ?
 C1 N1 Ni01 128.6(5) . . ?
 C1 N1 C2 105.6(6) . . ?
 C2 N1 Ni01 124.1(4) . . ?
 C1 N2 Ni02 128.6(4) . . ?
 C1 N2 C3 105.4(5) . . ?
 C3 N2 Ni02 125.5(5) . . ?
 C20 N3 Ni01 127.6(5) . . ?
 C20 N3 C31 119.0(6) . . ?
 C31 N3 Ni01 113.1(4) . . ?
 C29 N4 Ni01 129.8(5) . . ?
 C29 N4 C30 118.7(6) . . ?
 C30 N4 Ni01 110.8(4) . . ?
 C32 N5 Ni01 129.1(5) . . ?
 C32 N5 C43 118.5(6) . . ?
 C43 N5 Ni01 112.4(4) . . ?
 C41 N6 Ni01 127.8(5) . . ?
 C41 N6 C42 117.5(6) . . ?
 C42 N6 Ni01 114.7(4) . . ?
 C44 N7 Ni02 127.8(5) . . ?
 C44 N7 C55 118.6(5) . . ?
 C55 N7 Ni02 113.3(4) . . ?
 C53 N8 Ni02 129.4(4) . . ?
 C53 N8 C54 118.5(6) . . ?
 C54 N8 Ni02 112.0(5) . . ?
 C56 N9 Ni02 129.5(5) . . ?
 C56 N9 C67 116.8(6) . . ?
 C67 N9 Ni02 113.0(5) . . ?
 C65 N10 Ni02 128.5(5) . . ?
 C65 N10 C66 117.4(5) . . ?
 C66 N10 Ni02 114.1(4) . . ?
 N1 C1 N2 113.4(6) . . ?
 N1 C1 H1 123.3 . . ?
 N2 C1 H1 123.3 . . ?
 N1 C2 C3 108.0(6) . . ?
 N1 C2 C4 119.7(6) . . ?
 C3 C2 C4 132.0(7) . . ?
 N2 C3 C2 107.6(6) . . ?
 N2 C3 C12 120.5(6) . . ?
 C2 C3 C12 131.6(6) . . ?
 C5 C4 C2 120.4(6) . . ?
 C9 C4 C2 119.1(6) . . ?
 C9 C4 C5 120.4(6) . . ?
 O1 C5 C4 123.2(6) . . ?
 O1 C5 C6 120.8(6) . . ?
 C6 C5 C4 116.0(6) . . ?
 C5 C6 H6 117.7 . . ?
 C7 C6 C5 124.6(7) . . ?
 C7 C6 H6 117.7 . . ?
 C6 C7 H7 120.3 . . ?
 C6 C7 C8 119.5(7) . . ?
 C8 C7 H7 120.3 . . ?
 C7 C8 C10 121.2(7) . . ?
 C9 C8 C7 116.7(7) . . ?
 C9 C8 C10 122.1(7) . . ?
 C4 C9 C8 122.8(7) . . ?
 C4 C9 H9 118.6 . . ?
 C8 C9 H9 118.6 . . ?
 C8 C10 H10A 108.7 . . ?
 C8 C10 H10B 108.7 . . ?
 C8 C10 H10C 109.9 . . ?
 C8 C10 H10D 109.9 . . ?
 C8 C10 C11' 108.8(13) . . ?
 H10A C10 H10B 107.6 . . ?
 H10C C10 H10D 108.3 . . ?
 C11 C10 C8 114.0(8) . . ?
 C11 C10 H10A 108.7 . . ?
 C11 C10 H10B 108.7 . . ?
 C11' C10 H10C 109.9 . . ?
 C11' C10 H10D 109.9 . . ?
 C13 C12 C3 123.0(6) . . ?
 C17 C12 C3 119.6(6) . . ?
 C17 C12 C13 117.4(6) . . ?
 O2 C13 C12 121.1(6) . . ?
 O2 C13 C14 121.1(6) . . ?
 C14 C13 C12 117.8(6) . . ?
 C13 C14 H14 119.1 . . ?
 C15 C14 C13 121.8(7) . . ?
 C15 C14 H14 119.1 . . ?
 C14 C15 H15 118.9 . . ?
 C14 C15 C16 122.1(7) . . ?
 C16 C15 H15 118.9 . . ?
 C15 C16 C18 122.8(8) . . ?
 C15 C16 C18' 114.1(13) . . ?
 C17 C16 C15 117.4(7) . . ?
 C17 C16 C18 119.7(8) . . ?
 C17 C16 C18' 122.7(14) . . ?
 C12 C17 H17 118.3 . . ?
 C16 C17 C12 123.4(7) . . ?
 C16 C17 H17 118.3 . . ?
 N3 C20 H20 118.6 . . ?
 N3 C20 C21 122.9(8) . . ?
 C21 C20 H20 118.6 . . ?
 C20 C21 H21 120.9 . . ?
 C22 C21 C20 118.2(8) . . ?
 C22 C21 H21 120.9 . . ?
 C21 C22 H22 119.8 . . ?
 C21 C22 C23 120.4(7) . . ?
 C23 C22 H22 119.8 . . ?
 C22 C23 C24 124.1(7) . . ?
 C31 C23 C22 117.1(7) . . ?
 C31 C23 C24 118.8(7) . . ?
 C23 C24 H24 119.2 . . ?
 C25 C24 C23 121.5(7) . . ?
 C25 C24 H24 119.2 . . ?
 C24 C25 H25 118.9 . . ?
 C24 C25 C26 122.2(7) . . ?
 C26 C25 H25 118.9 . . ?
 C27 C26 C25 125.5(7) . . ?
 C27 C26 C30 117.4(6) . . ?
 C30 C26 C25 117.2(7) . . ?
 C26 C27 H27 120.2 . . ?
 C28 C27 C26 119.6(7) . . ?
 C28 C27 H27 120.2 . . ?
 C27 C28 H28 120.2 . . ?
 C27 C28 C29 119.6(7) . . ?
 C29 C28 H28 120.2 . . ?
 N4 C29 C28 123.1(7) . . ?
 N4 C29 H29 118.4 . . ?
 C28 C29 H29 118.4 . . ?
 N4 C30 C26 121.5(6) . . ?
 N4 C30 C31 118.6(6) . . ?
 C31 C30 C26 119.8(6) . . ?
 N3 C31 C23 122.2(7) . . ?
 N3 C31 C30 117.4(6) . . ?
 C23 C31 C30 120.3(7) . . ?
 N5 C32 H32 118.6 . . ?
 N5 C32 C33 122.8(7) . . ?
 C33 C32 H32 118.6 . . ?
 C32 C33 H33 120.5 . . ?
 C32 C33 C34 119.1(6) . . ?
 C34 C33 H33 120.5 . . ?
 C33 C34 H34 119.9 . . ?
 C33 C34 C35 120.3(6) . . ?
 C35 C34 H34 119.9 . . ?
 C34 C35 C36 124.1(7) . . ?
 C34 C35 C43 116.5(7) . . ?
 C43 C35 C36 119.3(6) . . ?
 C35 C36 H36 119.7 . . ?
 C37 C36 C35 120.6(7) . . ?
 C37 C36 H36 119.7 . . ?
 C36 C37 H37 119.5 . . ?
 C36 C37 C38 121.1(7) . . ?
 C38 C37 H37 119.5 . . ?
 C39 C38 C37 123.5(7) . . ?
 C42 C38 C37 119.5(6) . . ?
 C42 C38 C39 116.8(7) . . ?
 C38 C39 H39 120.0 . . ?
 C40 C39 C38 120.0(7) . . ?
 C40 C39 H39 120.0 . . ?
 C39 C40 H40 120.6 . . ?
 C39 C40 C41 118.9(6) . . ?
 C41 C40 H40 120.6 . . ?
 N6 C41 C40 122.6(7) . . ?
 N6 C41 H41 118.7 . . ?
 C40 C41 H41 118.7 . . ?
 N6 C42 C38 124.0(6) . . ?
 N6 C42 C43 116.2(6) . . ?
 C38 C42 C43 119.8(6) . . ?
 N5 C43 C35 122.8(6) . . ?
 N5 C43 C42 117.6(6) . . ?
 C35 C43 C42 119.6(6) . . ?
 N7 C44 H44 119.0 . . ?
 N7 C44 C45 121.9(7) . . ?
 C45 C44 H44 119.0 . . ?
 C44 C45 H45 119.8 . . ?
 C46 C45 C44 120.5(7) . . ?
 C46 C45 H45 119.8 . . ?
 C45 C46 H46 120.9 . . ?
 C45 C46 C47 118.2(6) . . ?
 C47 C46 H46 120.9 . . ?
 C46 C47 C48 124.2(6) . . ?
 C46 C47 C55 119.3(7) . . ?
 C55 C47 C48 116.5(7) . . ?
 C47 C48 H48 119.1 . . ?
 C49 C48 C47 121.8(7) . . ?
 C49 C48 H48 119.1 . . ?
 C48 C49 H49 118.3 . . ?
 C48 C49 C50 123.4(8) . . ?
 C50 C49 H49 118.3 . . ?
 C51 C50 C49 126.0(8) . . ?
 C51 C50 C54 117.2(7) . . ?
 C54 C50 C49 116.7(7) . . ?
 C50 C51 H51 120.1 . . ?
 C52 C51 C50 119.9(8) . . ?
 C52 C51 H51 120.1 . . ?
 C51 C52 H52 120.5 . . ?
 C51 C52 C53 118.9(7) . . ?
 C53 C52 H52 120.5 . . ?
 N8 C53 C52 123.4(6) . . ?
 N8 C53 H53 118.3 . . ?
 C52 C53 H53 118.3 . . ?
 N8 C54 C50 121.9(7) . . ?
 N8 C54 C55 118.0(6) . . ?
 C50 C54 C55 120.1(6) . . ?
 N7 C55 C47 121.4(6) . . ?
 N7 C55 C54 117.2(5) . . ?
 C47 C55 C54 121.3(7) . . ?
 N9 C56 H56 118.5 . . ?
 N9 C56 C57 122.9(6) . . ?
 C57 C56 H56 118.5 . . ?
 C56 C57 H57 120.0 . . ?
 C58 C57 C56 119.9(7) . . ?
 C58 C57 H57 120.0 . . ?
 C57 C58 H58 120.7 . . ?
 C57 C58 C59 118.7(8) . . ?
 C59 C58 H58 120.7 . . ?
 C58 C59 C60 122.6(7) . . ?
 C67 C59 C58 117.7(6) . . ?
 C67 C59 C60 119.6(7) . . ?
 C59 C60 H60 119.5 . . ?
 C61 C60 C59 121.0(7) . . ?
 C61 C60 H60 119.5 . . ?
 C60 C61 H61 119.6 . . ?
 C60 C61 C62 120.9(6) . . ?
 C62 C61 H61 119.6 . . ?
 C63 C62 C61 124.8(6) . . ?
 C63 C62 C66 115.9(7) . . ?
 C66 C62 C61 119.2(6) . . ?
 C62 C63 H63 119.8 . . ?
 C64 C63 C62 120.4(6) . . ?
 C64 C63 H63 119.8 . . ?
 C63 C64 H64 120.0 . . ?
 C63 C64 C65 120.1(7) . . ?
 C65 C64 H64 120.0 . . ?
 N10 C65 C64 122.8(7) . . ?
 N10 C65 H65 118.6 . . ?
 C64 C65 H65 118.6 . . ?
 N10 C66 C62 123.3(6) . . ?
 N10 C66 C67 118.1(5) . . ?
 C62 C66 C67 118.6(6) . . ?
 N9 C67 C66 115.7(6) . . ?
 C59 C67 N9 123.9(6) . . ?
 C59 C67 C66 120.4(5) . . ?
 C10 C11 H11A 109.5 . . ?
 C10 C11 H11B 109.5 . . ?
 C10 C11 H11C 109.5 . . ?
 H11A C11 H11B 109.5 . . ?
 H11A C11 H11C 109.5 . . ?
 H11B C11 H11C 109.5 . . ?
 C16 C18 H18A 109.1 . . ?
 C16 C18 H18B 109.1 . . ?
 H18A C18 H18B 107.9 . . ?
 C19 C18 C16 112.3(9) . . ?
 C19 C18 H18A 109.1 . . ?
 C19 C18 H18B 109.1 . . ?
 C18 C19 H19A 109.5 . . ?
 C18 C19 H19B 109.5 . . ?
 C18 C19 H19C 109.5 . . ?
 H19A C19 H19B 109.5 . . ?
 H19A C19 H19C 109.5 . . ?
 H19B C19 H19C 109.5 . . ?
 C10 C11' H11D 109.5 . . ?
 C10 C11' H11E 109.5 . . ?
 C10 C11' H11F 109.5 . . ?
 H11D C11' H11E 109.5 . . ?
 H11D C11' H11F 109.5 . . ?
 H11E C11' H11F 109.5 . . ?
 C16 C18' H18C 112.0 . . ?
 C16 C18' H18D 112.0 . . ?
 C16 C18' C19' 98.7(19) . . ?
 H18C C18' H18D 109.7 . . ?
 C19' C18' H18C 112.0 . . ?
 C19' C18' H18D 112.0 . . ?
 C18' C19' H19D 109.5 . . ?
 C18' C19' H19E 109.5 . . ?
 C18' C19' H19F 109.5 . . ?
 H19D C19' H19E 109.5 . . ?
 H19D C19' H19F 109.5 . . ?
 H19E C19' H19F 109.5 . . ?
 C1S O1S H1S 104.0 . . ?
 O1S C1S H1SA 109.5 . . ?
 O1S C1S H1SB 109.5 . . ?
 O1S C1S H1SC 109.5 . . ?
 H1SA C1S H1SB 109.5 . . ?
 H1SA C1S H1SC 109.5 . . ?
 H1SB C1S H1SC 109.5 . . ?
 C2S O2S H2S 122.0 . . ?
 O2S C2S H2SA 109.5 . . ?
 O2S C2S H2SB 109.5 . . ?
 O2S C2S H2SC 109.5 . . ?
 H2SA C2S H2SB 109.5 . . ?
 H2SA C2S H2SC 109.5 . . ?
 H2SB C2S H2SC 109.5 . . ?
 C3S O3S H3S 118.9 . . ?
 O3S C3S H3SA 109.5 . . ?
 O3S C3S H3SB 109.5 . . ?
 O3S C3S H3SC 109.5 . . ?
 H3SA C3S H3SB 109.5 . . ?
 H3SA C3S H3SC 109.5 . . ?
 H3SB C3S H3SC 109.5 . . ?

loop_
  _geom_torsion_atom_site_label_1
  _geom_torsion_atom_site_label_2
  _geom_torsion_atom_site_label_3
  _geom_torsion_atom_site_label_4
  _geom_torsion
  _geom_torsion_site_symmetry_1
  _geom_torsion_site_symmetry_2
  _geom_torsion_site_symmetry_3
  _geom_torsion_site_symmetry_4
  _geom_torsion_publ_flag
 Ni01 O1 C5 C4 49.6(7) . . . . ?
 Ni01 O1 C5 C6 -130.8(5) . . . . ?
 Ni01 N1 C1 N2 165.1(4) . . . . ?
 Ni01 N1 C2 C3 -165.4(4) . . . . ?
 Ni01 N1 C2 C4 20.4(7) . . . . ?
 Ni01 N3 C20 C21 177.6(5) . . . . ?
 Ni01 N3 C31 C23 -175.2(5) . . . . ?
 Ni01 N3 C31 C30 6.1(7) . . . . ?
 Ni01 N4 C29 C28 -171.1(5) . . . . ?
 Ni01 N4 C30 C26 171.6(5) . . . . ?
 Ni01 N4 C30 C31 -8.8(7) . . . . ?
 Ni01 N5 C32 C33 179.3(5) . . . . ?
 Ni01 N5 C43 C35 -178.7(6) . . . . ?
 Ni01 N5 C43 C42 2.2(8) . . . . ?
 Ni01 N6 C41 C40 -175.1(6) . . . . ?
 Ni01 N6 C42 C38 178.7(6) . . . . ?
 Ni01 N6 C42 C43 -4.3(8) . . . . ?
 Ni02 O2 C13 C12 47.8(7) . . . . ?
 Ni02 O2 C13 C14 -131.9(5) . . . . ?
 Ni02 N2 C1 N1 172.5(4) . . . . ?
 Ni02 N2 C3 C2 -172.1(4) . . . . ?
 Ni02 N2 C3 C12 13.1(7) . . . . ?
 Ni02 N7 C44 C45 175.3(6) . . . . ?
 Ni02 N7 C55 C47 -175.2(6) . . . . ?
 Ni02 N7 C55 C54 8.2(9) . . . . ?
 Ni02 N8 C53 C52 -171.4(7) . . . . ?
 Ni02 N8 C54 C50 172.9(8) . . . . ?
 Ni02 N8 C54 C55 -6.8(9) . . . . ?
 Ni02 N9 C56 C57 -170.6(6) . . . . ?
 Ni02 N9 C67 C59 171.0(6) . . . . ?
 Ni02 N9 C67 C66 -6.7(8) . . . . ?
 Ni02 N10 C65 C64 -179.0(5) . . . . ?
 Ni02 N10 C66 C62 -179.1(6) . . . . ?
 Ni02 N10 C66 C67 2.8(8) . . . . ?
 O1 C5 C6 C7 -178.2(5) . . . . ?
 O2 C13 C14 C15 -178.6(6) . . . . ?
 N1 C2 C3 N2 -1.3(6) . . . . ?
 N1 C2 C3 C12 172.8(6) . . . . ?
 N1 C2 C4 C5 -35.2(7) . . . . ?
 N1 C2 C4 C9 142.7(6) . . . . ?
 N2 C3 C12 C13 -29.7(8) . . . . ?
 N2 C3 C12 C17 149.2(6) . . . . ?
 N3 C20 C21 C22 -3.5(12) . . . . ?
 N4 C30 C31 N3 2.2(9) . . . . ?
 N4 C30 C31 C23 -176.6(6) . . . . ?
 N5 C32 C33 C34 -1.0(12) . . . . ?
 N6 C42 C43 N5 1.3(10) . . . . ?
 N6 C42 C43 C35 -177.8(7) . . . . ?
 N7 C44 C45 C46 -3.4(13) . . . . ?
 N8 C54 C55 N7 -0.8(11) . . . . ?
 N8 C54 C55 C47 -177.4(8) . . . . ?
 N9 C56 C57 C58 1.8(13) . . . . ?
 N10 C66 C67 N9 2.8(9) . . . . ?
 N10 C66 C67 C59 -175.1(6) . . . . ?
 C1 N1 C2 C3 1.2(6) . . . . ?
 C1 N1 C2 C4 -173.0(5) . . . . ?
 C1 N2 C3 C2 0.9(6) . . . . ?
 C1 N2 C3 C12 -174.0(5) . . . . ?
 C2 N1 C1 N2 -0.7(6) . . . . ?
 C2 C3 C12 C13 156.8(7) . . . . ?
 C2 C3 C12 C17 -24.2(10) . . . . ?
 C2 C4 C5 O1 -3.0(8) . . . . ?
 C2 C4 C5 C6 177.4(5) . . . . ?
 C2 C4 C9 C8 -179.5(5) . . . . ?
 C3 N2 C1 N1 -0.1(6) . . . . ?
 C3 C2 C4 C5 152.2(6) . . . . ?
 C3 C2 C4 C9 -29.9(9) . . . . ?
 C3 C12 C13 O2 -3.2(9) . . . . ?
 C3 C12 C13 C14 176.4(6) . . . . ?
 C3 C12 C17 C16 -177.6(6) . . . . ?
 C4 C2 C3 N2 172.0(5) . . . . ?
 C4 C2 C3 C12 -13.9(11) . . . . ?
 C4 C5 C6 C7 1.4(9) . . . . ?
 C5 C4 C9 C8 -1.6(9) . . . . ?
 C5 C6 C7 C8 -0.2(9) . . . . ?
 C6 C7 C8 C9 -1.8(9) . . . . ?
 C6 C7 C8 C10 179.4(6) . . . . ?
 C7 C8 C9 C4 2.7(9) . . . . ?
 C7 C8 C10 C11 -91.3(12) . . . . ?
 C7 C8 C10 C11' -59.2(18) . . . . ?
 C9 C4 C5 O1 179.1(5) . . . . ?
 C9 C4 C5 C6 -0.4(8) . . . . ?
 C9 C8 C10 C11 89.9(12) . . . . ?
 C9 C8 C10 C11' 122.0(18) . . . . ?
 C10 C8 C9 C4 -178.4(6) . . . . ?
 C12 C13 C14 C15 1.8(10) . . . . ?
 C13 C12 C17 C16 1.3(10) . . . . ?
 C13 C14 C15 C16 0.3(11) . . . . ?
 C14 C15 C16 C17 -1.5(11) . . . . ?
 C14 C15 C16 C18 173.8(7) . . . . ?
 C14 C15 C16 C18' -155.6(16) . . . . ?
 C15 C16 C17 C12 0.7(11) . . . . ?
 C15 C16 C18 C19 65.6(13) . . . . ?
 C15 C16 C18' C19' -118(2) . . . . ?
 C17 C12 C13 O2 177.8(5) . . . . ?
 C17 C12 C13 C14 -2.5(9) . . . . ?
 C17 C16 C18 C19 -119.1(10) . . . . ?
 C17 C16 C18' C19' 89(2) . . . . ?
 C20 N3 C31 C23 -0.5(9) . . . . ?
 C20 N3 C31 C30 -179.2(6) . . . . ?
 C20 C21 C22 C23 -0.1(12) . . . . ?
 C21 C22 C23 C24 -177.5(7) . . . . ?
 C21 C22 C23 C31 3.1(11) . . . . ?
 C22 C23 C24 C25 -178.7(7) . . . . ?
 C22 C23 C31 N3 -2.9(10) . . . . ?
 C22 C23 C31 C30 175.8(6) . . . . ?
 C23 C24 C25 C26 2.9(11) . . . . ?
 C24 C23 C31 N3 177.6(6) . . . . ?
 C24 C23 C31 C30 -3.7(10) . . . . ?
 C24 C25 C26 C27 176.3(7) . . . . ?
 C24 C25 C26 C30 -3.6(10) . . . . ?
 C25 C26 C27 C28 -178.8(6) . . . . ?
 C25 C26 C30 N4 -179.9(5) . . . . ?
 C25 C26 C30 C31 0.6(9) . . . . ?
 C26 C27 C28 C29 -2.3(10) . . . . ?
 C26 C30 C31 N3 -178.3(6) . . . . ?
 C26 C30 C31 C23 3.0(9) . . . . ?
 C27 C26 C30 N4 0.2(9) . . . . ?
 C27 C26 C30 C31 -179.3(6) . . . . ?
 C27 C28 C29 N4 2.4(10) . . . . ?
 C29 N4 C30 C26 -0.2(9) . . . . ?
 C29 N4 C30 C31 179.4(6) . . . . ?
 C30 N4 C29 C28 -1.1(10) . . . . ?
 C30 C26 C27 C28 1.0(10) . . . . ?
 C31 N3 C20 C21 3.7(10) . . . . ?
 C31 C23 C24 C25 0.7(11) . . . . ?
 C32 N5 C43 C35 0.9(11) . . . . ?
 C32 N5 C43 C42 -178.2(6) . . . . ?
 C32 C33 C34 C35 1.5(12) . . . . ?
 C33 C34 C35 C36 179.4(8) . . . . ?
 C33 C34 C35 C43 -0.8(12) . . . . ?
 C34 C35 C36 C37 -179.7(8) . . . . ?
 C34 C35 C43 N5 -0.4(11) . . . . ?
 C34 C35 C43 C42 178.7(7) . . . . ?
 C35 C36 C37 C38 2.6(13) . . . . ?
 C36 C35 C43 N5 179.4(7) . . . . ?
 C36 C35 C43 C42 -1.5(11) . . . . ?
 C36 C37 C38 C39 179.5(9) . . . . ?
 C36 C37 C38 C42 -4.7(12) . . . . ?
 C37 C38 C39 C40 179.8(9) . . . . ?
 C37 C38 C42 N6 -179.4(7) . . . . ?
 C37 C38 C42 C43 3.7(11) . . . . ?
 C38 C39 C40 C41 -0.8(15) . . . . ?
 C38 C42 C43 N5 178.5(6) . . . . ?
 C38 C42 C43 C35 -0.6(11) . . . . ?
 C39 C38 C42 N6 -3.3(12) . . . . ?
 C39 C38 C42 C43 179.8(7) . . . . ?
 C39 C40 C41 N6 -3.4(14) . . . . ?
 C41 N6 C42 C38 -0.6(11) . . . . ?
 C41 N6 C42 C43 176.4(6) . . . . ?
 C42 N6 C41 C40 4.0(11) . . . . ?
 C42 C38 C39 C40 3.9(14) . . . . ?
 C43 N5 C32 C33 -0.2(11) . . . . ?
 C43 C35 C36 C37 0.5(13) . . . . ?
 C44 N7 C55 C47 -1.5(11) . . . . ?
 C44 N7 C55 C54 -178.1(7) . . . . ?
 C44 C45 C46 C47 2.9(13) . . . . ?
 C45 C46 C47 C48 179.1(9) . . . . ?
 C45 C46 C47 C55 -1.8(13) . . . . ?
 C46 C47 C48 C49 -179.9(10) . . . . ?
 C46 C47 C55 N7 1.1(13) . . . . ?
 C46 C47 C55 C54 177.6(8) . . . . ?
 C47 C48 C49 C50 1.7(18) . . . . ?
 C48 C47 C55 N7 -179.7(8) . . . . ?
 C48 C47 C55 C54 -3.2(13) . . . . ?
 C48 C49 C50 C51 179.6(12) . . . . ?
 C48 C49 C50 C54 -2.1(18) . . . . ?
 C49 C50 C51 C52 -176.6(12) . . . . ?
 C49 C50 C54 N8 -179.9(9) . . . . ?
 C49 C50 C54 C55 -0.3(15) . . . . ?
 C50 C51 C52 C53 -4.8(17) . . . . ?
 C50 C54 C55 N7 179.5(8) . . . . ?
 C50 C54 C55 C47 2.9(13) . . . . ?
 C51 C50 C54 N8 -1.4(15) . . . . ?
 C51 C50 C54 C55 178.2(9) . . . . ?
 C51 C52 C53 N8 0.6(15) . . . . ?
 C53 N8 C54 C50 -2.6(13) . . . . ?
 C53 N8 C54 C55 177.8(7) . . . . ?
 C54 N8 C53 C52 3.1(12) . . . . ?
 C54 C50 C51 C52 5.1(17) . . . . ?
 C55 N7 C44 C45 2.6(12) . . . . ?
 C55 C47 C48 C49 1.0(15) . . . . ?
 C56 N9 C67 C59 -0.5(10) . . . . ?
 C56 N9 C67 C66 -178.3(6) . . . . ?
 C56 C57 C58 C59 -1.7(13) . . . . ?
 C57 C58 C59 C60 -176.2(8) . . . . ?
 C57 C58 C59 C67 0.5(11) . . . . ?
 C58 C59 C60 C61 179.9(8) . . . . ?
 C58 C59 C67 N9 0.6(11) . . . . ?
 C58 C59 C67 C66 178.3(7) . . . . ?
 C59 C60 C61 C62 -3.3(12) . . . . ?
 C60 C59 C67 N9 177.4(7) . . . . ?
 C60 C59 C67 C66 -5.0(11) . . . . ?
 C60 C61 C62 C63 -178.9(8) . . . . ?
 C60 C61 C62 C66 5.1(12) . . . . ?
 C61 C62 C63 C64 -176.5(8) . . . . ?
 C61 C62 C66 N10 175.3(7) . . . . ?
 C61 C62 C66 C67 -6.6(11) . . . . ?
 C62 C63 C64 C65 2.3(11) . . . . ?
 C62 C66 C67 N9 -175.4(6) . . . . ?
 C62 C66 C67 C59 6.7(10) . . . . ?
 C63 C62 C66 N10 -1.1(11) . . . . ?
 C63 C62 C66 C67 177.0(7) . . . . ?
 C63 C64 C65 N10 -2.9(11) . . . . ?
 C65 N10 C66 C62 0.6(10) . . . . ?
 C65 N10 C66 C67 -177.5(6) . . . . ?
 C66 N10 C65 C64 1.4(10) . . . . ?
 C66 C62 C63 C64 -0.4(11) . . . . ?
 C67 N9 C56 C57 -0.7(11) . . . . ?
 C67 C59 C60 C61 3.2(12) . . . . ?
 C18 C16 C17 C12 -174.9(7) . . . . ?
 C18' C16 C17 C12 152.3(16) . . . . ?

_smtbx_masks_special_details       ?
loop_
  _smtbx_masks_void_nr
  _smtbx_masks_void_average_x
  _smtbx_masks_void_average_y
  _smtbx_masks_void_average_z
  _smtbx_masks_void_volume
  _smtbx_masks_void_count_electrons
  _smtbx_masks_void_content
 1 0.000 0.000 0.000 252.6 60.3 ?

_shelx_fab_file
;
-14 1 1 3.5683 0.0809
-14 2 1 -0.0444 0.0730
-13 -4 1 1.9903 -0.0873
-13 -3 1 -4.0517 -0.0523
-13 -3 2 -0.2502 -0.0556
-13 -3 3 5.2022 0.0025
-13 -2 1 -9.4757 0.0097
-13 -2 2 -4.2275 -0.0292
-13 -2 3 4.2225 0.0004
-13 -2 4 6.9016 0.0302
-13 -1 1 -5.6743 0.0697
-13 -1 2 -2.1945 0.0016
-13 -1 3 3.4079 -0.0119
-13 -1 4 4.0221 0.0148
-13 0 1 1.8911 0.1058
-13 0 2 3.6190 0.0326
-13 0 3 4.3419 -0.0196
-13 0 4 1.4904 -0.0075
-13 0 5 2.1466 -0.0015
-13 1 1 3.4605 0.0932
-13 1 2 3.9350 0.0539
-13 1 3 1.7709 -0.0087
-13 1 4 -2.2968 -0.0157
-13 1 5 -0.9269 0.0007
-13 2 1 -0.1738 0.0268
-13 2 2 -1.1461 0.0422
-13 2 3 -4.2356 -0.0004
-13 2 4 -7.8377 -0.0176
-13 2 5 -5.2497 0.0069
-13 3 1 -3.6350 -0.0495
-13 3 2 -4.0119 0.0051
-13 3 3 -6.3414 -0.0073
-13 3 4 -9.9900 -0.0249
-13 3 5 -7.8138 0.0061
-13 4 1 -6.5885 -0.0871
-13 4 2 -3.5885 -0.0216
-13 4 3 -3.2519 -0.0038
-13 4 4 -6.8104 -0.0156
-13 4 5 -6.1478 0.0081
-13 5 1 -8.9401 -0.0849
-13 5 2 -4.1428 -0.0297
-13 5 3 -1.9905 0.0185
-13 5 4 -4.3142 0.0195
-13 6 1 -7.4606 -0.0567
-13 6 2 -5.5352 -0.0291
-13 6 3 -5.4737 0.0321
-12 -6 1 -3.9282 -0.0922
-12 -6 2 -2.3058 -0.0310
-12 -5 1 -0.8662 -0.0791
-12 -5 2 -0.9372 -0.0569
-12 -5 3 -4.1722 0.0006
-12 -4 1 3.7725 -0.0307
-12 -4 2 2.5005 -0.0598
-12 -4 3 -1.2839 -0.0138
-12 -4 4 -6.8367 0.0254
-12 -4 5 -7.9203 0.0139
-12 -3 1 3.2918 0.0288
-12 -3 2 3.4210 -0.0364
-12 -3 3 3.4683 -0.0208
-12 -3 4 0.3581 0.0287
-12 -3 5 -1.2843 0.0287
-12 -3 6 3.3723 0.0061
-12 -2 1 -1.4552 0.0740
-12 -2 2 0.1849 0.0045
-12 -2 3 5.0746 -0.0164
-12 -2 4 5.5345 0.0195
-12 -2 5 3.7240 0.0251
-12 -2 6 5.8275 -0.0055
-12 -2 7 7.5766 -0.0060
-12 -1 1 -2.6235 0.0855
-12 -1 2 -1.2248 0.0403
-12 -1 3 4.5989 -0.0079
-12 -1 4 5.9268 0.0012
-12 -1 5 4.0331 0.0101
-12 -1 6 4.8127 -0.0188
-12 -1 7 5.0172 -0.0289
-12 0 1 1.1318 0.0591
-12 0 2 2.0252 0.0547
-12 0 3 5.1112 0.0001
-12 0 4 4.2006 -0.0181
-12 0 5 1.9230 -0.0079
-12 0 6 2.8355 -0.0228
-12 0 7 2.9935 -0.0358
-12 0 8 0.2861 -0.0103
-12 1 1 3.6332 0.0026
-12 1 2 4.2071 0.0443
-12 1 3 4.2567 0.0106
-12 1 4 1.3188 -0.0257
-12 1 5 -0.5312 -0.0189
-12 1 6 1.5126 -0.0146
-12 1 7 2.4269 -0.0240
-12 1 8 0.8404 -0.0062
-12 2 1 2.3220 -0.0647
-12 2 2 1.7958 0.0104
-12 2 3 0.0322 0.0156
-12 2 4 -3.1542 -0.0213
-12 2 5 -3.4004 -0.0180
-12 2 6 0.6696 0.0061
-12 2 7 3.0245 0.0036
-12 2 8 2.0670 0.0020
-12 2 9 3.1286 0.0196
-12 3 1 -0.5591 -0.1045
-12 3 2 -1.2073 -0.0313
-12 3 3 -2.9325 0.0055
-12 3 4 -5.9426 -0.0176
-12 3 5 -5.5482 -0.0128
-12 3 6 0.1948 0.0277
-12 3 7 4.6763 0.0324
-12 3 8 4.3032 0.0077
-12 3 9 3.9139 0.0041
-12 4 1 -4.0915 -0.0879
-12 4 2 -1.7654 -0.0521
-12 4 3 -0.8596 -0.0055
-12 4 4 -3.8081 -0.0089
-12 4 5 -5.0471 -0.0043
-12 4 6 0.1442 0.0354
-12 4 7 5.7606 0.0412
-12 4 8 5.6970 0.0021
-12 5 1 -7.1725 -0.0324
-12 5 2 -1.4380 -0.0463
-12 5 3 2.4566 -0.0030
-12 5 4 -0.0375 0.0163
-12 5 5 -3.0466 0.0151
-12 5 6 0.2114 0.0311
-12 5 7 4.7859 0.0285
-12 5 8 3.3936 -0.0096
-12 6 1 -6.6020 0.0237
-12 6 2 -1.0330 -0.0303
-12 6 3 2.1040 0.0001
-12 6 4 -0.3628 0.0361
-12 6 5 -3.0275 0.0285
-12 6 6 -0.0668 0.0157
-12 6 7 3.5417 0.0071
-12 7 1 -2.4676 0.0638
-12 7 2 0.0671 -0.0063
-12 7 3 -1.0572 -0.0039
-12 7 4 -4.5570 0.0258
-12 7 5 -5.7527 0.0133
-12 7 6 -1.2482 -0.0153
-12 8 1 1.0855 0.0787
-12 8 2 0.9271 0.0272
-12 8 3 -3.1548 -0.0022
-12 8 4 -6.9170 0.0045
-11 -8 1 2.2516 -0.0796
-11 -7 1 0.4872 -0.1001
-11 -7 2 -1.3994 -0.0432
-11 -7 3 -1.1271 0.0230
-11 -6 1 -2.6317 -0.0797
-11 -6 2 -0.3691 -0.0611
-11 -6 3 1.5768 0.0079
-11 -6 4 0.8166 0.0236
-11 -6 5 -0.6452 -0.0011
-11 -5 1 -3.6868 -0.0174
-11 -5 2 -0.4529 -0.0489
-11 -5 3 0.7590 -0.0122
-11 -5 4 -2.8316 0.0159
-11 -5 5 -6.8912 -0.0039
-11 -5 6 -5.3131 -0.0206
-11 -4 1 -0.4898 0.0570
-11 -4 2 1.0913 -0.0137
-11 -4 3 0.2878 -0.0255
-11 -4 4 -4.9647 0.0051
-11 -4 5 -9.9930 0.0043
-11 -4 6 -7.4421 -0.0186
-11 -4 7 0.4221 -0.0133
-11 -3 1 2.9144 0.1008
-11 -3 2 3.3896 0.0234
-11 -3 3 2.6770 -0.0280
-11 -3 4 -1.7477 -0.0052
-11 -3 5 -6.9662 0.0173
-11 -3 6 -5.1293 0.0010
-11 -3 7 2.2920 -0.0017
-11 -3 8 4.1328 0.0204
-11 -2 1 2.7320 0.0914
-11 -2 2 3.1576 0.0460
-11 -2 3 5.1062 -0.0191
-11 -2 4 3.8116 -0.0150
-11 -2 5 -0.9910 0.0177
-11 -2 6 -1.5096 0.0117
-11 -2 7 3.1413 0.0012
-11 -2 8 3.9978 0.0184
-11 -2 9 -0.9349 0.0135
-11 -1 1 1.2896 0.0350
-11 -1 2 1.5226 0.0450
-11 -1 3 5.3907 -0.0022
-11 -1 4 6.6131 -0.0178
-11 -1 5 2.6363 0.0085
-11 -1 6 0.1712 0.0098
-11 -1 7 1.5491 -0.0084
-11 -1 8 1.2691 -0.0003
-11 -1 9 -0.8749 0.0064
-11 -1 10 0.0253 -0.0186
-11 0 1 1.4213 -0.0407
-11 0 2 1.6908 0.0197
-11 0 3 4.8201 0.0135
-11 0 4 5.6704 -0.0115
-11 0 5 2.2225 -0.0005
-11 0 6 -0.3927 0.0063
-11 0 7 -0.6524 -0.0143
-11 0 8 -1.6058 -0.0182
-11 0 9 -1.3880 -0.0005
-11 0 10 2.0852 -0.0009
-11 1 1 1.9932 -0.1011
-11 1 2 2.6622 -0.0174
-11 1 3 3.6714 0.0222
-11 1 4 2.6003 0.0004
-11 1 5 -0.3768 -0.0078
-11 1 6 -1.5930 0.0023
-11 1 7 -1.5668 -0.0108
-11 1 8 -2.4311 -0.0240
-11 1 9 -0.7214 -0.0051
-11 1 10 4.4759 0.0129
-11 1 11 4.1364 0.0031
-11 2 1 1.8975 -0.1204
-11 2 2 2.0606 -0.0478
-11 2 3 1.1317 0.0226
-11 2 4 -1.0042 0.0122
-11 2 5 -2.6883 -0.0130
-11 2 6 -1.5120 -0.0023
-11 2 7 -0.0381 -0.0002
-11 2 8 -0.8674 -0.0176
-11 2 9 0.3693 -0.0091
-11 2 10 5.7101 0.0152
-11 2 11 7.0056 0.0095
-11 3 1 1.3283 -0.0849
-11 3 2 0.7845 -0.0553
-11 3 3 -0.6807 0.0137
-11 3 4 -2.6200 0.0154
-11 3 5 -2.9721 -0.0163
-11 3 6 0.5933 -0.0048
-11 3 7 4.3166 0.0155
-11 3 8 3.4946 -0.0004
-11 3 9 1.9723 -0.0089
-11 3 10 4.6922 0.0112
-11 3 11 6.8560 0.0146
-11 4 1 -0.9169 -0.0044
-11 4 2 0.1042 -0.0331
-11 4 3 0.8724 0.0016
-11 4 4 -0.2197 0.0106
-11 4 5 -1.0903 -0.0169
-11 4 6 2.7465 -0.0078
-11 4 7 8.2857 0.0236
-11 4 8 8.1287 0.0158
-11 4 9 3.9286 -0.0038
-11 4 10 3.1880 0.0073
-11 4 11 4.9403 0.0167
-11 5 1 -4.6335 0.0755
-11 5 2 -0.4053 0.0016
-11 5 3 4.2249 -0.0066
-11 5 4 4.1556 0.0086
-11 5 5 1.0890 -0.0074
-11 5 6 2.2764 -0.0105
-11 5 7 7.1082 0.0149
-11 5 8 7.1552 0.0177
-11 5 9 2.0119 0.0003
-11 5 10 0.2022 0.0025
-11 5 11 2.8904 0.0080
-11 6 1 -5.6707 0.1076
-11 6 2 0.0805 0.0209
-11 6 3 6.0253 -0.0162
-11 6 4 6.0176 0.0059
-11 6 5 1.3687 0.0064
-11 6 6 -0.3209 -0.0094
-11 6 7 1.8978 0.0005
-11 6 8 0.5993 0.0136
-11 6 9 -5.0720 0.0065
-11 6 10 -6.4155 -0.0028
-11 7 1 -2.3496 0.0876
-11 7 2 2.5193 0.0230
-11 7 3 5.4060 -0.0269
-11 7 4 3.7407 -0.0103
-11 7 5 -0.6383 0.0032
-11 7 6 -2.5634 -0.0126
-11 7 7 -1.5589 -0.0108
-11 7 8 -3.5989 0.0125
-11 7 9 -9.7045 0.0175
-11 7 10 -11.8905 -0.0046
-11 8 1 0.7966 0.0371
-11 8 2 4.2091 0.0222
-11 8 3 3.0449 -0.0256
-11 8 4 -0.1185 -0.0305
-11 8 5 -2.9415 -0.0132
-11 8 6 -3.4215 -0.0167
-11 8 7 -1.6147 -0.0191
-11 8 8 -1.8787 0.0020
-11 9 1 0.7896 -0.0245
-11 9 2 2.3106 0.0152
-11 9 3 -0.3537 -0.0152
-11 9 4 -2.2585 -0.0383
-11 9 5 -2.7253 -0.0140
-11 9 6 -2.5077 0.0047
-11 9 7 -0.6983 -0.0087
-11 10 1 0.6882 -0.0706
-11 10 2 -0.8952 -0.0009
-11 10 3 -3.1356 -0.0091
-10 -9 1 5.5057 -0.0928
-10 -9 2 0.8119 -0.0196
-10 -8 1 5.3034 -0.0997
-10 -8 2 -0.8035 -0.0643
-10 -8 3 -7.1422 0.0054
-10 -8 4 -7.1270 0.0033
-10 -7 1 3.2453 -0.0601
-10 -7 2 -1.4081 -0.0733
-10 -7 3 -4.0527 -0.0067
-10 -7 4 -2.4475 0.0248
-10 -7 5 2.1339 0.0029
-10 -7 6 5.2435 0.0069
-10 -6 1 -0.3059 0.0038
-10 -6 2 -1.4161 -0.0464
-10 -6 3 0.0346 -0.0089
-10 -6 4 1.8851 0.0364
-10 -6 5 2.9724 0.0249
-10 -6 6 3.6952 0.0114
-10 -6 7 4.2596 0.0234
-10 -5 1 -3.2006 0.0688
-10 -5 2 -1.8969 0.0038
-10 -5 3 1.6005 -0.0080
-10 -5 4 2.6439 0.0220
-10 -5 5 0.4064 0.0191
-10 -5 6 -0.7711 -0.0054
-10 -5 7 2.0052 -0.0046
-10 -5 8 6.2338 0.0042
-10 -4 1 -2.6683 0.1049
-10 -4 2 -1.6647 0.0530
-10 -4 3 0.8887 -0.0040
-10 -4 4 0.7463 -0.0046
-10 -4 5 -2.9928 0.0021
-10 -4 6 -4.7533 -0.0199
-10 -4 7 -0.6490 -0.0307
-10 -4 8 4.5892 -0.0130
-10 -4 9 4.1544 -0.0067
-10 -3 1 0.3268 0.0880
-10 -3 2 -0.0007 0.0731
-10 -3 3 0.7101 0.0002
-10 -3 4 -0.0807 -0.0267
-10 -3 5 -3.8917 -0.0086
-10 -3 6 -5.6794 -0.0130
-10 -3 7 -1.4185 -0.0283
-10 -3 8 3.0478 -0.0115
-10 -3 9 0.2613 0.0049
-10 -3 10 -5.5209 -0.0120
-10 -2 1 2.4427 0.0246
-10 -2 2 1.2316 0.0554
-10 -2 3 1.5536 0.0028
-10 -2 4 1.5196 -0.0369
-10 -2 5 -1.7740 -0.0153
-10 -2 6 -4.2589 0.0015
-10 -2 7 -1.3542 -0.0094
-10 -2 8 1.8935 0.0008
-10 -2 9 -1.2270 0.0203
-10 -2 10 -5.9242 0.0026
-10 -2 11 -3.4365 -0.0165
-10 -1 1 2.7050 -0.0525
-10 -1 2 0.9630 0.0131
-10 -1 3 1.9362 0.0072
-10 -1 4 3.3291 -0.0288
-10 -1 5 0.8657 -0.0165
-10 -1 6 -2.5581 0.0106
-10 -1 7 -2.0536 0.0057
-10 -1 8 -0.4689 0.0041
-10 -1 9 -2.1356 0.0196
-10 -1 10 -3.2987 0.0106
-10 -1 11 -0.1695 -0.0126
-10 -1 12 1.1042 -0.0085
-10 0 1 2.0325 -0.1051
-10 0 2 0.4322 -0.0331
-10 0 3 1.5460 0.0120
-10 0 4 3.1596 -0.0034
-10 0 5 1.3480 -0.0058
-10 0 6 -1.9715 0.0181
-10 0 7 -3.0296 0.0175
-10 0 8 -3.0308 0.0012
-10 0 9 -3.2122 0.0047
-10 0 10 -0.6617 0.0082
-10 0 11 3.1628 -0.0057
-10 0 12 -0.2259 -0.0142
-10 1 1 0.8181 -0.1086
-10 1 2 0.2588 -0.0640
-10 1 3 0.7227 0.0125
-10 1 4 0.9702 0.0250
-10 1 5 -0.7717 0.0094
-10 1 6 -2.8524 0.0201
-10 1 7 -3.5232 0.0240
-10 1 8 -3.9236 0.0000
-10 1 9 -3.1652 -0.0104
-10 1 10 1.6284 0.0024
-10 1 11 6.2555 0.0038
-10 1 12 1.5020 -0.0093
-10 1 13 -10.9832 -0.0144
-10 2 1 -0.0613 -0.0640
-10 2 2 -0.0197 -0.0668
-10 2 3 -0.5869 0.0077
-10 2 4 -1.7439 0.0405
-10 2 5 -3.2998 0.0153
-10 2 6 -3.6355 0.0075
-10 2 7 -2.7342 0.0160
-10 2 8 -2.7727 -0.0036
-10 2 9 -2.3401 -0.0230
-10 2 10 2.3676 -0.0064
-10 2 11 7.8448 0.0114
-10 2 12 5.4692 0.0016
-10 2 13 -3.7881 -0.0067
-10 3 1 0.4940 0.0094
-10 3 2 -0.0182 -0.0392
-10 3 3 -1.4050 0.0000
-10 3 4 -2.7101 0.0358
-10 3 5 -3.2832 0.0085
-10 3 6 -1.6657 -0.0139
-10 3 7 1.2433 -0.0008
-10 3 8 1.4744 -0.0061
-10 3 9 -0.6728 -0.0281
-10 3 10 0.4832 -0.0157
-10 3 11 5.3631 0.0137
-10 3 12 6.8685 0.0156
-10 3 13 2.7003 0.0071
-10 4 1 0.9789 0.0844
-10 4 2 0.3660 0.0099
-10 4 3 -0.2818 -0.0045
-10 4 4 -0.4729 0.0173
-10 4 5 -0.2473 -0.0033
-10 4 6 2.4567 -0.0308
-10 4 7 7.2989 -0.0147
-10 4 8 8.3282 -0.0006
-10 4 9 3.1535 -0.0151
-10 4 10 -1.1414 -0.0111
-10 4 11 0.8533 0.0171
-10 4 12 4.2213 0.0262
-10 4 13 3.4756 0.0196
-10 5 1 -0.8082 0.1232
-10 5 2 -0.0344 0.0532
-10 5 3 2.0788 -0.0039
-10 5 4 3.5473 0.0005
-10 5 5 3.0925 -0.0064
-10 5 6 4.3146 -0.0337
-10 5 7 9.1772 -0.0247
-10 5 8 11.3054 0.0036
-10 5 9 5.6638 0.0071
-10 5 10 -1.1652 0.0078
-10 5 11 -1.2480 0.0233
-10 5 12 1.8490 0.0251
-10 5 13 1.2636 0.0117
-10 6 1 -2.8313 0.0977
-10 6 2 -0.6006 0.0600
-10 6 3 3.8414 -0.0067
-10 6 4 6.1550 -0.0097
-10 6 5 4.1382 0.0013
-10 6 6 2.0712 -0.0206
-10 6 7 3.9794 -0.0272
-10 6 8 5.3729 0.0012
-10 6 9 1.0622 0.0215
-10 6 10 -3.8271 0.0228
-10 6 11 -2.2638 0.0206
-10 6 12 1.7114 0.0084
-10 6 13 0.7866 -0.0135
-10 7 1 -1.4683 0.0273
-10 7 2 1.2986 0.0345
-10 7 3 4.8628 -0.0124
-10 7 4 5.8360 -0.0190
-10 7 5 2.9453 0.0036
-10 7 6 -0.8761 -0.0044
-10 7 7 -2.2885 -0.0180
-10 7 8 -3.4264 0.0035
-10 7 9 -7.2964 0.0311
-10 7 10 -9.6936 0.0290
-10 7 11 -5.4439 0.0062
-10 7 12 0.9869 -0.0168
-10 8 1 1.3791 -0.0416
-10 8 2 4.6570 0.0073
-10 8 3 5.1488 -0.0066
-10 8 4 3.4576 -0.0232
-10 8 5 1.0578 -0.0068
-10 8 6 -1.4532 0.0018
-10 8 7 -3.5731 -0.0049
-10 8 8 -6.1658 0.0090
-10 8 9 -10.1312 0.0352
-10 8 10 -12.1659 0.0310
-10 8 11 -8.1085 -0.0053
-10 9 1 0.8891 -0.0823
-10 9 2 4.3335 -0.0127
-10 9 3 2.6346 0.0061
-10 9 4 -0.0303 -0.0189
-10 9 5 -0.3505 -0.0170
-10 9 6 -0.0468 0.0066
-10 9 7 -1.0381 0.0105
-10 9 8 -3.3165 0.0077
-10 9 9 -6.6734 0.0190
-10 9 10 -9.2418 0.0180
-10 10 1 -1.6764 -0.0824
-10 10 2 -0.6107 -0.0297
-10 10 3 -3.3292 0.0067
-10 10 4 -4.3415 -0.0167
-10 10 5 -1.2290 -0.0223
-10 10 6 2.0416 0.0174
-10 10 7 2.3330 0.0345
-10 10 8 0.4124 0.0097
-10 11 1 -0.9501 -0.0450
-10 11 2 -4.3925 -0.0338
-10 11 3 -8.6573 0.0030
-10 11 4 -8.2700 -0.0143
-9 -10 1 -1.5224 -0.0892
-9 -10 2 1.4175 -0.0306
-9 -9 1 3.8514 -0.0836
-9 -9 2 4.0956 -0.0598
-9 -9 3 -1.8834 0.0152
-9 -9 4 -7.8290 0.0277
-9 -8 1 5.8394 -0.0280
-9 -8 2 3.5158 -0.0622
-9 -8 3 -2.9216 -0.0148
-9 -8 4 -7.7996 0.0194
-9 -8 5 -6.0985 -0.0063
-9 -8 6 -0.9628 -0.0142
-9 -7 1 4.0907 0.0451
-9 -7 2 0.3592 -0.0342
-9 -7 3 -3.9561 -0.0324
-9 -7 4 -5.4802 0.0105
-9 -7 5 -2.4985 0.0054
-9 -7 6 1.8285 -0.0120
-9 -7 7 2.4983 0.0056
-9 -7 8 -0.0413 0.0119
-9 -6 1 1.0154 0.0937
-9 -6 2 -2.3221 0.0091
-9 -6 3 -3.6657 -0.0290
-9 -6 4 -2.4513 0.0050
-9 -6 5 0.4039 0.0189
-9 -6 6 3.1585 0.0003
-9 -6 7 3.8218 0.0056
-9 -6 8 3.1852 0.0196
-9 -6 9 4.5244 0.0025
-9 -5 1 -0.8598 0.0997
-9 -5 2 -3.0090 0.0502
-9 -5 3 -2.2012 -0.0094
-9 -5 4 0.0321 -0.0032
-9 -5 5 1.2923 0.0172
-9 -5 6 1.6885 0.0046
-9 -5 7 2.5954 -0.0023
-9 -5 8 4.9033 0.0139
-9 -5 9 8.0135 0.0118
-9 -5 10 9.4239 -0.0138
-9 -4 1 -0.5250 0.0619
-9 -4 2 -2.1130 0.0712
-9 -4 3 -0.9879 0.0162
-9 -4 4 1.1059 -0.0110
-9 -4 5 1.1176 0.0030
-9 -4 6 -0.3092 0.0007
-9 -4 7 0.1544 -0.0160
-9 -4 8 3.4938 -0.0071
-9 -4 9 6.4133 0.0068
-9 -4 10 5.6258 -0.0108
-9 -4 11 3.0606 -0.0285
-9 -3 1 0.8055 -0.0081
-9 -3 2 -0.8449 0.0563
-9 -3 3 -0.7635 0.0326
-9 -3 4 0.6930 -0.0134
-9 -3 5 0.5716 -0.0100
-9 -3 6 -1.1013 0.0010
-9 -3 7 -0.8774 -0.0176
-9 -3 8 1.7918 -0.0216
-9 -3 9 2.4004 0.0002
-9 -3 10 -0.9436 -0.0042
-9 -3 11 -2.2490 -0.0287
-9 -3 12 2.9300 -0.0193
-9 -2 1 1.4344 -0.0783
-9 -2 2 -0.4693 0.0114
-9 -2 3 -1.3154 0.0316
-9 -2 4 -0.3683 -0.0113
-9 -2 5 -0.3042 -0.0196
-9 -2 6 -1.5589 0.0022
-9 -2 7 -1.0221 -0.0065
-9 -2 8 1.2295 -0.0184
-9 -2 9 0.2130 0.0034
-9 -2 10 -4.4941 0.0120
-9 -2 11 -4.6509 -0.0114
-9 -2 12 3.4193 -0.0109
-9 -2 13 9.1937 0.0139
-9 -1 1 1.0978 -0.1117
-9 -1 2 -1.3112 -0.0367
-9 -1 3 -2.2190 0.0190
-9 -1 4 -1.1907 -0.0041
-9 -1 5 -1.0902 -0.0240
-9 -1 6 -2.3853 -0.0024
-9 -1 7 -2.0034 0.0038
-9 -1 8 0.0448 -0.0087
-9 -1 9 -0.6083 0.0052
-9 -1 10 -3.8462 0.0220
-9 -1 11 -2.7440 0.0082
-9 -1 12 3.9038 0.0012
-9 -1 13 5.9453 0.0161
-9 -1 14 -2.0228 0.0084
-9 0 1 0.2672 -0.0904
-9 0 2 -2.3816 -0.0624
-9 0 3 -2.8150 0.0045
-9 0 4 -1.5419 0.0095
-9 0 5 -1.4757 -0.0159
-9 0 6 -2.9377 -0.0046
-9 0 7 -3.2155 0.0130
-9 0 8 -1.9363 0.0032
-9 0 9 -1.6948 0.0004
-9 0 10 -1.9671 0.0140
-9 0 11 0.8391 0.0126
-9 0 12 4.5585 0.0036
-9 0 13 1.2508 0.0049
-9 0 14 -8.8593 -0.0049
-9 1 1 -0.8084 -0.0229
-9 1 2 -2.5558 -0.0543
-9 1 3 -2.4440 -0.0058
-9 1 4 -1.6168 0.0236
-9 1 5 -2.0097 0.0030
-9 1 6 -3.3618 -0.0000
-9 1 7 -3.7318 0.0220
-9 1 8 -2.9236 0.0188
-9 1 9 -2.0767 -0.0003
-9 1 10 -0.2565 0.0010
-9 1 11 3.5969 0.0082
-9 1 12 5.4301 0.0008
-9 1 13 -0.2402 -0.0078
-9 1 14 -10.0556 -0.0120
-9 1 15 -13.4172 -0.0182
-9 2 1 -1.5739 0.0565
-9 2 2 -1.7957 -0.0191
-9 2 3 -1.4396 -0.0101
-9 2 4 -1.6398 0.0289
-9 2 5 -2.8929 0.0192
-9 2 6 -4.1713 0.0017
-9 2 7 -4.0110 0.0186
-9 2 8 -2.7589 0.0247
-9 2 9 -1.5075 0.0001
-9 2 10 0.6078 -0.0092
-9 2 11 4.2664 0.0044
-9 2 12 6.0700 0.0035
-9 2 13 2.1692 -0.0106
-9 2 14 -4.6578 -0.0109
-9 2 15 -7.5185 -0.0004
-9 3 1 -1.1291 0.1060
-9 3 2 -0.7043 0.0227
-9 3 3 -0.7966 -0.0112
-9 3 4 -1.6425 0.0183
-9 3 5 -3.0039 0.0210
-9 3 6 -3.8758 -0.0047
-9 3 7 -2.9814 0.0005
-9 3 8 -1.2160 0.0138
-9 3 9 -0.7579 -0.0062
-9 3 10 -0.8623 -0.0221
-9 3 11 1.1709 -0.0047
-9 3 12 4.4286 0.0071
-9 3 13 5.0182 -0.0024
-9 3 14 2.3476 -0.0036
-9 3 15 -0.4665 0.0058
-9 4 1 0.4655 0.1077
-9 4 2 0.3986 0.0538
-9 4 3 -0.5021 -0.0101
-9 4 4 -1.1530 -0.0038
-9 4 5 -1.4621 0.0094
-9 4 6 -1.1262 -0.0130
-9 4 7 1.0335 -0.0182
-9 4 8 3.3825 0.0001
-9 4 9 1.8928 -0.0079
-9 4 10 -2.6765 -0.0268
-9 4 11 -4.1457 -0.0149
-9 4 12 -0.1734 0.0054
-9 4 13 4.4917 0.0077
-9 4 14 5.7150 0.0102
-9 4 15 4.2343 0.0139
-9 5 1 1.4651 0.0659
-9 5 2 0.9415 0.0617
-9 5 3 0.1375 -0.0047
-9 5 4 0.3010 -0.0199
-9 5 5 0.8289 -0.0001
-9 5 6 1.7977 -0.0123
-9 5 7 4.9938 -0.0263
-9 5 8 8.4709 -0.0083
-9 5 9 6.3857 0.0015
-9 5 10 -1.1630 -0.0106
-9 5 11 -5.9433 -0.0082
-9 5 12 -3.4930 0.0069
-9 5 13 1.4042 0.0123
-9 5 14 4.0937 0.0171
-9 5 15 5.4965 0.0216
-9 6 1 0.5287 -0.0061
-9 6 2 0.2172 0.0361
-9 6 3 0.7806 -0.0014
-9 6 4 1.9387 -0.0205
-9 6 5 2.1928 0.0042
-9 6 6 1.9206 0.0035
-9 6 7 3.9613 -0.0203
-9 6 8 7.4136 -0.0145
-9 6 9 6.6145 0.0065
-9 6 10 0.7786 0.0095
-9 6 11 -3.2356 0.0091
-9 6 12 -2.0493 0.0141
-9 6 13 -0.0661 0.0127
-9 6 14 0.6254 0.0094
-9 6 15 3.5491 0.0069
-9 7 1 -0.6011 -0.0746
-9 7 2 -0.3695 -0.0088
-9 7 3 1.1769 -0.0027
-9 7 4 2.4278 -0.0121
-9 7 5 1.9952 0.0118
-9 7 6 0.2549 0.0222
-9 7 7 -0.4275 -0.0030
-9 7 8 0.3377 -0.0143
-9 7 9 -0.2785 0.0026
-9 7 10 -2.4063 0.0147
-9 7 11 -2.1308 0.0141
-9 7 12 0.6255 0.0116
-9 7 13 1.0571 0.0072
-9 7 14 -0.8036 -0.0003
-9 8 1 0.2274 -0.0986
-9 8 2 1.4909 -0.0344
-9 8 3 2.4396 0.0067
-9 8 4 1.9769 0.0036
-9 8 5 0.9696 0.0111
-9 8 6 -0.2783 0.0250
-9 8 7 -2.0973 0.0114
-9 8 8 -4.5117 -0.0066
-9 8 9 -7.1174 0.0006
-9 8 10 -7.9976 0.0139
-9 8 11 -4.8663 0.0104
-9 8 12 0.3104 -0.0015
-9 8 13 2.3392 -0.0052
-9 9 1 0.7810 -0.0728
-9 9 2 3.6801 -0.0297
-9 9 3 3.7303 0.0258
-9 9 4 1.1965 0.0244
-9 9 5 -0.0125 0.0076
-9 9 6 0.7581 0.0142
-9 9 7 0.2639 0.0149
-9 9 8 -3.1748 -0.0006
-9 9 9 -7.6022 -0.0009
-9 9 10 -9.6215 0.0144
-9 9 11 -7.0598 0.0129
-9 9 12 -1.3649 -0.0065
-9 10 1 -1.7411 -0.0172
-9 10 2 1.4726 -0.0158
-9 10 3 1.2428 0.0269
-9 10 4 -1.3680 0.0294
-9 10 5 -1.3449 0.0013
-9 10 6 1.8657 0.0005
-9 10 7 3.5166 0.0130
-9 10 8 0.7790 0.0036
-9 10 9 -4.2361 -0.0045
-9 10 10 -7.7410 0.0091
-9 10 11 -7.0838 0.0136
-9 11 1 -3.8136 0.0502
-9 11 2 -3.5047 0.0010
-9 11 3 -5.0111 0.0082
-9 11 4 -6.4918 0.0144
-9 11 5 -4.0360 -0.0116
-9 11 6 1.8543 -0.0186
-9 11 7 6.0342 0.0034
-9 11 8 5.0143 0.0089
-9 11 9 0.0824 -0.0006
-9 12 1 -0.9740 0.0909
-9 12 2 -4.5182 0.0156
-9 12 3 -8.6986 -0.0050
-9 12 4 -10.4200 0.0090
-9 12 5 -7.1353 -0.0121
-8 -11 1 -9.7140 -0.0812
-8 -11 2 -5.7920 -0.0482
-8 -10 1 -7.4268 -0.0655
-8 -10 2 -3.8148 -0.0705
-8 -10 3 -0.7177 0.0004
-8 -10 4 -1.5762 0.0349
-8 -9 1 -0.8729 -0.0135
-8 -9 2 1.3773 -0.0564
-8 -9 3 1.5224 -0.0136
-8 -9 4 -2.3857 0.0376
-8 -9 5 -4.9446 0.0222
-8 -9 6 -3.6491 0.0009
-8 -8 1 3.7249 0.0646
-8 -8 2 4.3979 -0.0053
-8 -8 3 2.7409 -0.0199
-8 -8 4 -1.9085 0.0191
-8 -8 5 -4.8279 0.0209
-8 -8 6 -3.6927 -0.0050
-8 -8 7 -1.6644 0.0016
-8 -8 8 -1.0633 0.0109
-8 -7 1 3.2839 0.1209
-8 -7 2 2.3757 0.0520
-8 -7 3 0.6826 -0.0166
-8 -7 4 -1.8008 -0.0068
-8 -7 5 -2.7076 0.0100
-8 -7 6 -1.1280 -0.0100
-8 -7 7 -0.0782 -0.0150
-8 -7 8 -1.3024 0.0012
-8 -7 9 -1.2183 -0.0027
-8 -6 1 0.2131 0.1119
-8 -6 2 -1.7246 0.0774
-8 -6 3 -2.9573 -0.0098
-8 -6 4 -3.1208 -0.0283
-8 -6 5 -1.8817 -0.0033
-8 -6 6 0.5548 -0.0087
-8 -6 7 1.7423 -0.0201
-8 -6 8 0.4918 -0.0034
-8 -6 9 0.5667 0.0054
-8 -6 10 5.3862 -0.0125
-8 -6 11 11.3278 -0.0224
-8 -5 1 -1.2708 0.0442
-8 -5 2 -3.3731 0.0620
-8 -5 3 -4.3730 -0.0012
-8 -5 4 -3.8521 -0.0372
-8 -5 5 -2.4229 -0.0151
-8 -5 6 -0.4072 -0.0031
-8 -5 7 1.0547 -0.0134
-8 -5 8 1.4605 -0.0028
-8 -5 9 3.0355 0.0164
-8 -5 10 6.8012 0.0032
-8 -5 11 9.2869 -0.0217
-8 -5 12 7.7227 -0.0145
-8 -4 1 -0.1699 -0.0416
-8 -4 2 -1.8461 0.0220
-8 -4 3 -2.6593 0.0112
-8 -4 4 -2.2206 -0.0267
-8 -4 5 -1.6170 -0.0181
-8 -4 6 -1.2905 0.0062
-8 -4 7 -1.0107 0.0005
-8 -4 8 0.0108 -0.0037
-8 -4 9 2.6635 0.0159
-8 -4 10 5.3722 0.0171
-8 -4 11 5.2238 -0.0113
-8 -4 12 3.0333 -0.0183
-8 -4 13 1.3370 0.0029
-8 -3 1 0.8541 -0.1059
-8 -3 2 -0.1393 -0.0246
-8 -3 3 -0.6183 0.0217
-8 -3 4 0.0577 -0.0010
-8 -3 5 0.5737 -0.0093
-8 -3 6 -0.0779 0.0174
-8 -3 7 -1.1679 0.0172
-8 -3 8 -0.9949 -0.0053
-8 -3 9 0.7017 0.0026
-8 -3 10 1.5063 0.0175
-8 -3 11 0.5502 -0.0041
-8 -3 12 1.3571 -0.0236
-8 -3 13 3.9983 -0.0080
-8 -3 14 0.7103 -0.0011
-8 -2 1 0.0567 -0.1203
-8 -2 2 -0.5552 -0.0599
-8 -2 3 -0.6739 0.0223
-8 -2 4 0.3817 0.0241
-8 -2 5 1.2874 0.0016
-8 -2 6 0.9270 0.0194
-8 -2 7 0.1485 0.0258
-8 -2 8 0.4021 -0.0048
-8 -2 9 0.9013 -0.0103
-8 -2 10 -0.6454 0.0132
-8 -2 11 -2.2682 0.0054
-8 -2 12 1.7790 -0.0188
-8 -2 13 8.8958 -0.0098
-8 -2 14 6.3058 0.0041
-8 -2 15 -8.6928 -0.0107
-8 -1 1 -1.5873 -0.0774
-8 -1 2 -2.7238 -0.0670
-8 -1 3 -2.4963 0.0133
-8 -1 4 -1.0880 0.0359
-8 -1 5 -0.2297 0.0047
-8 -1 6 -0.4323 0.0043
-8 -1 7 -0.1969 0.0163
-8 -1 8 1.4586 -0.0060
-8 -1 9 2.5528 -0.0182
-8 -1 10 0.5809 0.0073
-8 -1 11 -1.4024 0.0167
-8 -1 12 2.9201 -0.0008
-8 -1 13 10.3592 0.0018
-8 -1 14 8.0413 0.0152
-8 -1 15 -6.0513 0.0041
-8 0 1 -3.0304 0.0008
-8 0 2 -5.2223 -0.0438
-8 0 3 -4.4813 -0.0009
-8 0 4 -2.4256 0.0305
-8 0 5 -1.7509 0.0011
-8 0 6 -2.4758 -0.0169
-8 0 7 -2.3309 -0.0017
-8 0 8 -0.1317 -0.0051
-8 0 9 2.2185 -0.0191
-8 0 10 2.1269 -0.0039
-8 0 11 1.2876 0.0156
-8 0 12 4.0869 0.0121
-8 0 13 8.1841 0.0116
-8 0 14 4.7827 0.0198
-8 0 15 -6.1610 0.0109
-8 0 16 -12.2208 -0.0036
-8 1 1 -3.7337 0.0784
-8 1 2 -6.2480 -0.0015
-8 1 3 -4.8118 -0.0137
-8 1 4 -2.2351 0.0122
-8 1 5 -1.7563 -0.0034
-8 1 6 -3.1573 -0.0283
-8 1 7 -3.9572 -0.0125
-8 1 8 -2.5378 0.0054
-8 1 9 0.2657 -0.0052
-8 1 10 2.1812 -0.0092
-8 1 11 2.8162 0.0054
-8 1 12 4.0868 0.0106
-8 1 13 5.1753 0.0071
-8 1 14 1.8551 0.0102
-8 1 15 -5.2352 0.0087
-8 1 16 -8.4917 -0.0032
-8 2 1 -3.0792 0.1209
-8 2 2 -4.4343 0.0430
-8 2 3 -2.3442 -0.0156
-8 2 4 -0.2028 -0.0063
-8 2 5 -0.6728 -0.0031
-8 2 6 -3.0408 -0.0246
-8 2 7 -4.7930 -0.0148
-8 2 8 -3.9780 0.0165
-8 2 9 -0.8415 0.0159
-8 2 10 2.0479 -0.0017
-8 2 11 2.7979 0.0013
-8 2 12 2.5995 0.0073
-8 2 13 2.7923 -0.0026
-8 2 14 1.9118 -0.0078
-8 2 15 -1.0507 -0.0011
-8 2 16 -3.4764 -0.0002
-8 3 1 -1.7431 0.1045
-8 3 2 -1.2356 0.0679
-8 3 3 1.0544 -0.0073
-8 3 4 2.0787 -0.0175
-8 3 5 0.3874 0.0017
-8 3 6 -2.9638 -0.0091
-8 3 7 -5.4466 -0.0122
-8 3 8 -4.7246 0.0156
-8 3 9 -1.2110 0.0241
-8 3 10 1.5477 0.0030
-8 3 11 1.2698 -0.0028
-8 3 12 0.1943 0.0043
-8 3 13 1.3158 -0.0064
-8 3 14 3.5320 -0.0190
-8 3 15 3.4727 -0.0128
-8 3 16 0.5482 -0.0048
-8 3 17 -2.0250 -0.0002
-8 4 1 -0.6528 0.0377
-8 4 2 0.7336 0.0611
-8 4 3 2.1255 0.0017
-8 4 4 2.0672 -0.0249
-8 4 5 0.3378 0.0018
-8 4 6 -2.5116 0.0074
-8 4 7 -4.6254 -0.0055
-8 4 8 -3.7360 0.0079
-8 4 9 -0.8100 0.0191
-8 4 10 0.1117 -0.0015
-8 4 11 -2.0151 -0.0165
-8 4 12 -3.0752 -0.0094
-8 4 13 0.0210 -0.0099
-8 4 14 4.7378 -0.0162
-8 4 15 6.3389 -0.0102
-8 4 16 3.1976 -0.0062
-8 4 17 -1.8172 -0.0046
-8 5 1 0.8177 -0.0407
-8 5 2 1.5570 0.0299
-8 5 3 1.1829 0.0071
-8 5 4 0.2011 -0.0265
-8 5 5 -0.6675 -0.0038
-8 5 6 -1.6235 0.0157
-8 5 7 -1.8855 0.0014
-8 5 8 -0.0187 0.0008
-8 5 9 2.0949 0.0128
-8 5 10 0.5212 -0.0018
-8 5 11 -3.8614 -0.0241
-8 5 12 -5.4304 -0.0232
-8 5 13 -1.8142 -0.0143
-8 5 14 3.6697 -0.0064
-8 5 15 7.1650 0.0081
-8 5 16 6.8626 0.0125
-8 5 17 2.5601 0.0046
-8 6 1 1.9641 -0.0959
-8 6 2 1.7620 -0.0146
-8 6 3 0.5236 0.0055
-8 6 4 -0.6725 -0.0173
-8 6 5 -1.0257 -0.0033
-8 6 6 -0.8715 0.0211
-8 6 7 0.2426 0.0086
-8 6 8 3.1170 -0.0051
-8 6 9 5.4020 0.0037
-8 6 10 3.5328 0.0012
-8 6 11 -1.1014 -0.0151
-8 6 12 -3.6392 -0.0163
-8 6 13 -2.7123 -0.0055
-8 6 14 0.0653 0.0068
-8 6 15 4.5723 0.0234
-8 6 16 9.4619 0.0298
-8 7 1 0.6617 -0.1077
-8 7 2 0.0776 -0.0564
-8 7 3 -0.2728 -0.0057
-8 7 4 -0.4366 -0.0043
-8 7 5 -0.4594 0.0029
-8 7 6 -0.4140 0.0258
-8 7 7 0.2502 0.0196
-8 7 8 2.1705 -0.0043
-8 7 9 4.0297 -0.0093
-8 7 10 3.8314 -0.0059
-8 7 11 2.1918 -0.0067
-8 7 12 0.6270 0.0010
-8 7 13 -1.4784 0.0142
-8 7 14 -3.3760 0.0223
-8 7 15 -0.7641 0.0277
-8 7 16 6.5987 0.0230
-8 8 1 -1.2511 -0.0678
-8 8 2 -1.9624 -0.0650
-8 8 3 -1.2726 -0.0097
-8 8 4 -0.5972 0.0087
-8 8 5 -0.4121 0.0048
-8 8 6 -0.1949 0.0186
-8 8 7 -0.0384 0.0241
-8 8 8 -0.4141 0.0023
-8 8 9 -1.1246 -0.0172
-8 8 10 -1.1238 -0.0176
-8 8 11 0.3311 -0.0077
-8 8 12 1.6319 0.0067
-8 8 13 -0.1802 0.0197
-8 8 14 -4.1076 0.0255
-8 8 15 -4.5226 0.0247
-8 9 1 -0.4837 -0.0002
-8 9 2 -0.7459 -0.0326
-8 9 3 0.2090 0.0062
-8 9 4 0.1050 0.0270
-8 9 5 -0.6799 0.0078
-8 9 6 -0.1290 0.0030
-8 9 7 0.8251 0.0138
-8 9 8 -0.5928 0.0028
-8 9 9 -4.0633 -0.0193
-8 9 10 -6.0035 -0.0203
-8 9 11 -4.3180 -0.0044
-8 9 12 -1.1611 0.0063
-8 9 13 -0.2802 0.0071
-8 9 14 -2.2240 0.0087
-8 9 15 -3.7673 0.0130
-8 10 1 0.3817 0.0527
-8 10 2 1.3623 0.0085
-8 10 3 2.9396 0.0183
-8 10 4 2.0422 0.0349
-8 10 5 -0.1073 0.0142
-8 10 6 0.1465 -0.0048
-8 10 7 1.9984 0.0008
-8 10 8 1.0881 -0.0021
-8 10 9 -3.2225 -0.0177
-8 10 10 -6.7718 -0.0130
-8 10 11 -6.4636 0.0083
-8 10 12 -3.3062 0.0126
-8 10 13 -0.2061 -0.0011
-8 11 1 -1.8283 0.0797
-8 11 2 -0.7161 0.0368
-8 11 3 1.4236 0.0079
-8 11 4 1.3405 0.0149
-8 11 5 -0.1258 0.0105
-8 11 6 0.5980 -0.0077
-8 11 7 3.1000 -0.0099
-8 11 8 3.0317 -0.0062
-8 11 9 -0.9025 -0.0090
-8 11 10 -5.0956 0.0006
-8 11 11 -6.0998 0.0197
-8 11 12 -3.6171 0.0184
-8 12 1 -3.0553 0.0817
-8 12 2 -4.1290 0.0544
-8 12 3 -3.5794 -0.0047
-8 12 4 -2.9695 -0.0089
-8 12 5 -2.1174 0.0055
-8 12 6 0.7132 -0.0101
-8 12 7 4.7398 -0.0261
-8 12 8 6.1449 -0.0180
-8 12 9 3.1385 -0.0030
-7 -12 1 -3.7859 -0.0639
-7 -11 1 -6.9340 -0.0193
-7 -11 2 -7.4270 -0.0503
-7 -11 3 -3.9676 -0.0014
-7 -11 4 -1.4556 0.0373
-7 -10 1 -7.3096 0.0276
-7 -10 2 -7.7206 -0.0433
-7 -10 3 -3.4010 -0.0292
-7 -10 4 -0.5539 0.0256
-7 -10 5 0.2715 0.0257
-7 -10 6 0.3586 -0.0040
-7 -9 1 -3.1232 0.0643
-7 -9 2 -3.8469 -0.0109
-7 -9 3 -0.8201 -0.0382
-7 -9 4 0.4889 0.0046
-7 -9 5 -0.3401 0.0244
-7 -9 6 -1.0188 0.0008
-7 -9 7 -1.7301 -0.0012
-7 -9 8 -1.6622 0.0101
-7 -8 1 1.7511 0.0861
-7 -8 2 0.9305 0.0422
-7 -8 3 2.5909 -0.0198
-7 -8 4 2.6003 -0.0131
-7 -8 5 0.5220 0.0142
-7 -8 6 -0.9746 0.0023
-7 -8 7 -1.4682 -0.0094
-7 -8 8 -1.4157 0.0009
-7 -8 9 0.0182 -0.0055
-7 -7 1 2.8396 0.0768
-7 -7 2 1.9615 0.0861
-7 -7 3 3.2421 0.0140
-7 -7 4 3.6890 -0.0199
-7 -7 5 2.1662 0.0026
-7 -7 6 0.6917 0.0060
-7 -7 7 -0.0789 -0.0110
-7 -7 8 -1.1201 -0.0071
-7 -7 9 -1.4151 0.0005
-7 -7 10 1.1746 -0.0060
-7 -7 11 5.4977 -0.0032
-7 -6 1 -0.0429 0.0221
-7 -6 2 -0.9533 0.0832
-7 -6 3 0.0831 0.0354
-7 -6 4 1.2608 -0.0212
-7 -6 5 1.2085 -0.0117
-7 -6 6 1.1233 0.0050
-7 -6 7 1.2203 -0.0091
-7 -6 8 -0.1817 -0.0124
-7 -6 9 -1.8884 0.0037
-7 -6 10 0.1493 0.0027
-7 -6 11 5.6301 -0.0127
-7 -6 12 8.4546 -0.0125
-7 -5 1 -2.7360 -0.0557
-7 -5 2 -3.5317 0.0298
-7 -5 3 -3.2521 0.0300
-7 -5 4 -2.6504 -0.0209
-7 -5 5 -2.4034 -0.0269
-7 -5 6 -1.4302 -0.0029
-7 -5 7 0.1175 -0.0058
-7 -5 8 -0.0989 -0.0141
-7 -5 9 -1.4391 0.0034
-7 -5 10 0.0168 0.0136
-7 -5 11 4.0106 -0.0066
-7 -5 12 5.6044 -0.0188
-7 -5 13 3.2359 -0.0014
-7 -4 1 -2.2889 -0.1092
-7 -4 2 -2.8598 -0.0391
-7 -4 3 -3.1702 0.0085
-7 -4 4 -3.4426 -0.0134
-7 -4 5 -3.9107 -0.0306
-7 -4 6 -3.6012 -0.0069
-7 -4 7 -2.4429 0.0052
-7 -4 8 -2.0882 -0.0079
-7 -4 9 -1.9970 -0.0011
-7 -4 10 0.0409 0.0198
-7 -4 11 2.2915 0.0112
-7 -4 12 1.5079 -0.0089
-7 -4 13 -0.5378 -0.0003
-7 -4 14 -1.3607 0.0122
-7 -3 1 -0.8205 -0.1074
-7 -3 2 -1.1123 -0.0849
-7 -3 3 -1.0796 -0.0124
-7 -3 4 -0.7665 0.0038
-7 -3 5 -0.9978 -0.0161
-7 -3 6 -1.7237 0.0007
-7 -3 7 -2.5661 0.0249
-7 -3 8 -3.4740 0.0078
-7 -3 9 -3.0210 -0.0072
-7 -3 10 -0.3724 0.0136
-7 -3 11 1.4026 0.0223
-7 -3 12 0.3648 0.0019
-7 -3 13 -0.3264 -0.0020
-7 -3 14 -0.7021 0.0109
-7 -3 15 -6.2211 0.0062
-7 -2 1 -0.8452 -0.0509
-7 -2 2 -1.2524 -0.0873
-7 -2 3 -0.4637 -0.0232
-7 -2 4 1.4433 0.0225
-7 -2 5 2.5332 0.0062
-7 -2 6 1.8843 0.0087
-7 -2 7 0.1621 0.0365
-7 -2 8 -1.4943 0.0219
-7 -2 9 -1.4076 -0.0113
-7 -2 10 0.4894 0.0001
-7 -2 11 1.4753 0.0213
-7 -2 12 1.5966 0.0054
-7 -2 13 4.0891 -0.0099
-7 -2 14 4.9887 0.0013
-7 -2 15 -4.5575 0.0053
-7 -2 16 -19.3694 -0.0033
-7 -1 1 -1.3978 0.0336
-7 -1 2 -2.8684 -0.0469
-7 -1 3 -1.7735 -0.0201
-7 -1 4 1.2921 0.0332
-7 -1 5 3.1394 0.0222
-7 -1 6 2.7308 0.0049
-7 -1 7 1.6460 0.0245
-7 -1 8 1.3167 0.0202
-7 -1 9 2.3145 -0.0150
-7 -1 10 3.5726 -0.0138
-7 -1 11 3.0985 0.0138
-7 -1 12 2.9535 0.0082
-7 -1 13 7.0065 -0.0118
-7 -1 14 9.7263 -0.0056
-7 -1 15 0.4795 0.0045
-7 -1 16 -16.0769 -0.0011
-7 0 1 -1.8863 0.1025
-7 0 2 -5.0631 0.0120
-7 0 3 -3.9082 -0.0099
-7 0 4 0.0232 0.0279
-7 0 5 1.9658 0.0243
-7 0 6 0.9838 -0.0068
-7 0 7 -0.0878 -0.0020
-7 0 8 0.7258 0.0066
-7 0 9 3.3338 -0.0165
-7 0 10 5.7232 -0.0246
-7 0 11 5.3260 0.0000
-7 0 12 3.9597 0.0094
-7 0 13 6.1992 -0.0028
-7 0 14 8.8378 -0.0005
-7 0 15 2.8755 0.0111
-7 0 16 -9.5474 0.0101
-7 0 17 -14.8840 0.0067
-7 1 1 -2.9215 0.1204
-7 1 2 -7.4725 0.0564
-7 1 3 -6.0475 -0.0045
-7 1 4 -1.1022 0.0034
-7 1 5 1.1952 0.0098
-7 1 6 -0.4466 -0.0180
-7 1 7 -2.6954 -0.0235
-7 1 8 -2.7721 -0.0030
-7 1 9 0.1253 -0.0063
-7 1 10 4.2516 -0.0224
-7 1 11 5.6738 -0.0128
-7 1 12 3.9038 0.0043
-7 1 13 3.5131 0.0046
-7 1 14 5.2415 0.0065
-7 1 15 3.3001 0.0179
-7 1 16 -3.3865 0.0204
-7 1 17 -7.3477 0.0131
-7 2 1 -2.9034 0.0808
-7 2 2 -7.4219 0.0684
-7 2 3 -5.5598 -0.0032
-7 2 4 -0.4431 -0.0258
-7 2 5 1.6028 -0.0114
-7 2 6 -0.7263 -0.0223
-7 2 7 -4.2728 -0.0325
-7 2 8 -5.8100 -0.0077
-7 2 9 -3.3749 0.0104
-7 2 10 1.7604 -0.0032
-7 2 11 4.4198 -0.0102
-7 2 12 2.2528 0.0023
-7 2 13 0.1331 0.0060
-7 2 14 2.1301 0.0023
-7 2 15 4.5324 0.0104
-7 2 16 2.7394 0.0178
-7 2 17 -0.9093 0.0097
-7 2 18 -1.3898 -0.0031
-7 3 1 -1.1701 0.0021
-7 3 2 -3.6465 0.0479
-7 3 3 -1.0743 0.0017
-7 3 4 2.8964 -0.0368
-7 3 5 3.2107 -0.0196
-7 3 6 -0.5028 -0.0106
-7 3 7 -5.1259 -0.0247
-7 3 8 -7.2217 -0.0118
-7 3 9 -4.4634 0.0164
-7 3 10 1.3389 0.0150
-7 3 11 3.9965 0.0022
-7 3 12 0.8278 0.0071
-7 3 13 -2.4730 0.0074
-7 3 14 -0.0990 -0.0069
-7 3 15 5.0684 -0.0093
-7 3 16 6.2175 -0.0007
-7 3 17 2.5076 -0.0025
-7 3 18 -0.4843 -0.0082
-7 4 1 -0.4402 -0.0785
-7 4 2 -0.1182 0.0080
-7 4 3 2.9795 0.0093
-7 4 4 5.3756 -0.0269
-7 4 5 4.0359 -0.0130
-7 4 6 -0.4470 0.0128
-7 4 7 -5.3166 -0.0002
-7 4 8 -7.2711 -0.0086
-7 4 9 -4.1175 0.0122
-7 4 10 1.6841 0.0193
-7 4 11 3.9469 0.0057
-7 4 12 0.7140 0.0038
-7 4 13 -2.4974 0.0039
-7 4 14 -0.5563 -0.0113
-7 4 15 4.1914 -0.0203
-7 4 16 5.5876 -0.0161
-7 4 17 1.7121 -0.0167
-7 4 18 -2.9243 -0.0133
-7 5 1 -0.6204 -0.1162
-7 5 2 0.9084 -0.0272
-7 5 3 2.9624 0.0157
-7 5 4 3.5352 -0.0086
-7 5 5 1.8397 -0.0067
-7 5 6 -1.2721 0.0247
-7 5 7 -4.3891 0.0209
-7 5 8 -5.3511 0.0005
-7 5 9 -2.5890 0.0090
-7 5 10 1.6362 0.0178
-7 5 11 2.8649 0.0013
-7 5 12 0.5501 -0.0111
-7 5 13 -1.2793 -0.0100
-7 5 14 0.1756 -0.0134
-7 5 15 3.4307 -0.0139
-7 5 16 4.8537 -0.0081
-7 5 17 1.8270 -0.0127
-7 5 18 -4.3243 -0.0155
-7 6 1 1.0305 -0.0940
-7 6 2 1.9946 -0.0434
-7 6 3 1.8468 0.0165
-7 6 4 0.5185 0.0096
-7 6 5 -1.0733 -0.0042
-7 6 6 -2.1334 0.0163
-7 6 7 -2.5495 0.0214
-7 6 8 -1.7443 0.0028
-7 6 9 0.6774 0.0037
-7 6 10 2.9234 0.0131
-7 6 11 2.7188 -0.0013
-7 6 12 0.6193 -0.0188
-7 6 13 -1.0982 -0.0181
-7 6 14 -1.0835 -0.0119
-7 6 15 1.3522 -0.0021
-7 6 16 5.3420 0.0111
-7 6 17 6.3400 0.0083
-7 6 18 0.6378 -0.0036
-7 7 1 2.2460 -0.0317
-7 7 2 2.4239 -0.0450
-7 7 3 1.3269 0.0028
-7 7 4 -0.1956 0.0169
-7 7 5 -1.2482 -0.0020
-7 7 6 -1.3163 0.0015
-7 7 7 -0.4337 0.0122
-7 7 8 1.2677 0.0028
-7 7 9 3.3567 -0.0035
-7 7 10 4.6478 0.0004
-7 7 11 4.2138 -0.0056
-7 7 12 2.1246 -0.0123
-7 7 13 -1.3158 -0.0058
-7 7 14 -4.6199 0.0014
-7 7 15 -3.8015 0.0075
-7 7 16 2.8728 0.0183
-7 7 17 9.1628 0.0177
-7 8 1 0.1651 0.0417
-7 8 2 -0.6877 -0.0311
-7 8 3 -1.2859 -0.0179
-7 8 4 -0.9826 0.0086
-7 8 5 -0.5128 -0.0055
-7 8 6 -0.0127 -0.0142
-7 8 7 0.9573 0.0029
-7 8 8 2.0869 0.0096
-7 8 9 2.6995 -0.0019
-7 8 10 2.9780 -0.0116
-7 8 11 3.3186 -0.0129
-7 8 12 2.5047 -0.0037
-7 8 13 -1.4426 0.0115
-7 8 14 -7.1084 0.0166
-7 8 15 -8.6718 0.0133
-7 8 16 -2.8137 0.0148
-7 8 17 4.9503 0.0102
-7 9 1 -0.8372 0.0932
-7 9 2 -3.2835 0.0006
-7 9 3 -3.7953 -0.0215
-7 9 4 -2.3249 0.0008
-7 9 5 -1.1740 -0.0095
-7 9 6 -0.5735 -0.0281
-7 9 7 0.5987 -0.0108
-7 9 8 1.3328 0.0110
-7 9 9 0.1342 0.0026
-7 9 10 -1.4514 -0.0150
-7 9 11 -1.1700 -0.0148
-7 9 12 -0.4832 0.0005
-7 9 13 -2.6440 0.0127
-7 9 14 -7.0712 0.0108
-7 9 15 -9.1405 0.0048
-7 9 16 -6.1905 0.0067
-7 10 1 1.9628 0.0879
-7 10 2 -0.8842 0.0265
-7 10 3 -1.1942 -0.0104
-7 10 4 -0.0493 0.0003
-7 10 5 -0.4781 -0.0030
-7 10 6 -1.5937 -0.0237
-7 10 7 -0.8491 -0.0176
-7 10 8 0.1912 0.0028
-7 10 9 -1.4015 -0.0004
-7 10 10 -4.0087 -0.0143
-7 10 11 -4.3352 -0.0099
-7 10 12 -3.2819 0.0029
-7 10 13 -3.7189 0.0018
-7 10 14 -5.3871 -0.0102
-7 10 15 -6.0053 -0.0149
-7 11 1 2.6590 0.0339
-7 11 2 1.1582 0.0285
-7 11 3 2.5611 -0.0065
-7 11 4 4.2318 -0.0104
-7 11 5 2.6179 0.0017
-7 11 6 -0.4693 -0.0025
-7 11 7 -1.0847 -0.0063
-7 11 8 -0.3048 0.0007
-7 11 9 -1.5277 -0.0007
-7 11 10 -3.6842 -0.0068
-7 11 11 -3.8176 -0.0005
-7 11 12 -2.7631 0.0062
-7 11 13 -2.6489 -0.0028
-7 11 14 -2.9315 -0.0144
-7 12 1 -1.2195 -0.0202
-7 12 2 -2.1846 0.0249
-7 12 3 0.4042 -0.0033
-7 12 4 3.6138 -0.0268
-7 12 5 3.7833 -0.0038
-7 12 6 1.9418 0.0151
-7 12 7 1.3952 0.0070
-7 12 8 1.5434 0.0003
-7 12 9 -0.1343 0.0028
-7 12 10 -2.3907 0.0053
-7 12 11 -2.6047 0.0093
-7 12 12 -1.6320 0.0098
-7 13 1 -3.1677 -0.0545
-7 13 2 -5.4023 0.0212
-7 13 3 -4.4677 0.0083
-7 13 4 -1.3061 -0.0260
-7 13 5 1.7227 -0.0006
-7 13 6 3.8831 0.0300
-7 13 7 5.7848 0.0134
-7 13 8 6.2931 -0.0095
-7 13 9 3.8858 -0.0077
-6 -12 1 -0.6383 -0.0129
-6 -12 2 -3.1071 -0.0423
-6 -12 3 -4.1860 0.0014
-6 -11 1 -0.4294 0.0583
-6 -11 2 -2.9811 -0.0091
-6 -11 3 -3.5264 -0.0152
-6 -11 4 -3.2908 0.0263
-6 -11 5 -1.9983 0.0330
-6 -10 1 -2.0586 0.1032
-6 -10 2 -4.5323 0.0276
-6 -10 3 -3.9016 -0.0259
-6 -10 4 -2.2764 -0.0018
-6 -10 5 -1.0921 0.0254
-6 -10 6 0.2832 0.0085
-6 -10 7 -0.3382 -0.0020
-6 -9 1 -1.7882 0.0947
-6 -9 2 -4.4237 0.0498
-6 -9 3 -3.7099 -0.0243
-6 -9 4 -1.4393 -0.0302
-6 -9 5 -0.0272 0.0024
-6 -9 6 0.7141 0.0003
-6 -9 7 -0.2442 -0.0116
-6 -9 8 -2.5911 0.0035
-6 -9 9 -1.9726 0.0034
-6 -8 1 0.6927 0.0388
-6 -8 2 -1.8929 0.0512
-6 -8 3 -1.4775 -0.0073
-6 -8 4 0.7498 -0.0410
-6 -8 5 1.9297 -0.0171
-6 -8 6 1.9602 -0.0039
-6 -8 7 1.0170 -0.0153
-6 -8 8 -0.5512 -0.0090
-6 -8 9 -0.4754 0.0006
-6 -8 10 1.6160 -0.0128
-6 -8 11 2.4969 -0.0149
-6 -7 1 2.5799 -0.0359
-6 -7 2 0.3469 0.0330
-6 -7 3 1.1117 0.0187
-6 -7 4 3.6281 -0.0267
-6 -7 5 4.5099 -0.0191
-6 -7 6 3.5012 0.0060
-6 -7 7 2.0932 -0.0006
-6 -7 8 0.8249 -0.0084
-6 -7 9 0.1768 0.0013
-6 -7 10 0.6609 0.0010
-6 -7 11 1.3183 -0.0070
-6 -7 12 0.5164 -0.0021
-6 -6 1 1.2399 -0.0984
-6 -6 2 -0.1979 -0.0019
-6 -6 3 1.1876 0.0367
-6 -6 4 3.9081 0.0013
-6 -6 5 4.6791 -0.0098
-6 -6 6 3.4476 0.0164
-6 -6 7 2.3320 0.0182
-6 -6 8 1.3755 0.0007
-6 -6 9 -0.3281 0.0043
-6 -6 10 -1.3350 0.0129
-6 -6 11 -0.2299 0.0007
-6 -6 12 0.7164 -0.0098
-6 -6 13 -1.6093 0.0008
-6 -5 1 -1.9032 -0.1204
-6 -5 2 -2.2764 -0.0419
-6 -5 3 -1.0045 0.0326
-6 -5 4 0.6817 0.0236
-6 -5 5 0.8689 -0.0027
-6 -5 6 0.3043 0.0102
-6 -5 7 0.8792 0.0198
-6 -5 8 1.2353 0.0026
-6 -5 9 -0.8443 -0.0004
-6 -5 10 -3.0673 0.0153
-6 -5 11 -2.2636 0.0087
-6 -5 12 -0.6284 -0.0122
-6 -5 13 -1.5643 -0.0067
-6 -5 14 -3.7362 0.0113
-6 -4 1 -2.6764 -0.0846
-6 -4 2 -2.4180 -0.0648
-6 -4 3 -2.1016 0.0091
-6 -4 4 -2.1150 0.0304
-6 -4 5 -2.8401 0.0002
-6 -4 6 -3.0778 -0.0065
-6 -4 7 -1.4894 0.0075
-6 -4 8 -0.1520 -0.0019
-6 -4 9 -1.5401 -0.0133
-6 -4 10 -3.2501 0.0038
-6 -4 11 -2.5591 0.0147
-6 -4 12 -2.0769 -0.0014
-6 -4 13 -3.5418 -0.0063
-6 -4 14 -3.4643 0.0076
-6 -4 15 -1.2772 0.0029
-6 -3 1 -0.6712 -0.0045
-6 -3 2 -0.5505 -0.0564
-6 -3 3 -1.1648 -0.0200
-6 -3 4 -1.5437 0.0222
-6 -3 5 -1.8408 0.0034
-6 -3 6 -2.0213 -0.0165
-6 -3 7 -1.4860 0.0010
-6 -3 8 -1.3692 0.0035
-6 -3 9 -2.4966 -0.0189
-6 -3 10 -2.3422 -0.0131
-6 -3 11 -0.2353 0.0138
-6 -3 12 -0.3838 0.0148
-6 -3 13 -3.3142 0.0041
-6 -3 14 -3.8844 0.0097
-6 -3 15 -2.5578 0.0105
-6 -3 16 -4.8403 0.0016
-6 -2 1 1.2817 0.0795
-6 -2 2 0.4395 -0.0217
-6 -2 3 -0.8698 -0.0402
-6 -2 4 -0.0299 0.0047
-6 -2 5 1.8252 0.0057
-6 -2 6 2.4883 -0.0173
-6 -2 7 1.7890 0.0014
-6 -2 8 0.0136 0.0191
-6 -2 9 -1.7547 -0.0073
-6 -2 10 -0.6748 -0.0209
-6 -2 11 2.6385 0.0074
-6 -2 12 3.1586 0.0226
-6 -2 13 0.6728 0.0090
-6 -2 14 -0.2983 0.0056
-6 -2 15 -2.1085 0.0122
-6 -2 16 -9.8928 0.0093
-6 -2 17 -16.4141 0.0079
-6 -1 1 3.0874 0.1269
-6 -1 2 0.4209 0.0238
-6 -1 3 -1.9288 -0.0393
-6 -1 4 -0.0886 -0.0099
-6 -1 5 3.4845 0.0069
-6 -1 6 5.0026 -0.0154
-6 -1 7 4.3540 -0.0046
-6 -1 8 2.6637 0.0242
-6 -1 9 1.1378 0.0075
-6 -1 10 2.0102 -0.0184
-6 -1 11 4.5715 -0.0009
-6 -1 12 4.8772 0.0186
-6 -1 13 3.5863 0.0035
-6 -1 14 4.1581 -0.0095
-6 -1 15 2.1664 -0.0008
-6 -1 16 -8.1927 0.0052
-6 -1 17 -18.4942 0.0022
-6 -1 18 -15.5389 -0.0031
-6 0 1 5.0003 0.1170
-6 0 2 0.2280 0.0594
-6 0 3 -3.1072 -0.0177
-6 0 4 -0.8371 -0.0130
-6 0 5 3.0286 0.0109
-6 0 6 4.0738 -0.0073
-6 0 7 3.2823 -0.0131
-6 0 8 2.5938 0.0134
-6 0 9 2.4724 0.0122
-6 0 10 3.8445 -0.0151
-6 0 11 5.6632 -0.0128
-6 0 12 4.7898 0.0057
-6 0 13 2.8400 -0.0031
-6 0 14 4.0116 -0.0194
-6 0 15 4.4675 -0.0131
-6 0 16 -2.5852 -0.0002
-6 0 17 -12.0679 0.0027
-6 0 18 -12.7906 0.0002
-6 1 1 4.2983 0.0562
-6 1 2 -2.1679 0.0664
-6 1 3 -5.5376 0.0069
-6 1 4 -2.1290 -0.0123
-6 1 5 2.2420 0.0112
-6 1 6 2.4712 0.0063
-6 1 7 0.4326 -0.0111
-6 1 8 -0.8535 0.0026
-6 1 9 -0.5210 0.0131
-6 1 10 2.1049 -0.0086
-6 1 11 5.2058 -0.0224
-6 1 12 4.5252 -0.0099
-6 1 13 1.1473 -0.0048
-6 1 14 0.9578 -0.0133
-6 1 15 3.3637 -0.0094
-6 1 16 1.7520 0.0045
-6 1 17 -3.8728 0.0103
-6 1 18 -6.5714 0.0095
-6 1 19 -4.0287 0.0063
-6 2 1 1.3510 -0.0264
-6 2 2 -6.0042 0.0400
-6 2 3 -8.6710 0.0182
-6 2 4 -3.8813 -0.0164
-6 2 5 1.3374 -0.0011
-6 2 6 1.3751 0.0123
-6 2 7 -1.8133 -0.0041
-6 2 8 -4.5932 -0.0050
-6 2 9 -4.9765 0.0121
-6 2 10 -1.5659 0.0045
-6 2 11 3.2785 -0.0171
-6 2 12 3.7870 -0.0146
-6 2 13 -0.0683 -0.0007
-6 2 14 -1.2954 -0.0000
-6 2 15 2.4720 0.0011
-6 2 16 5.2250 0.0122
-6 2 17 2.9051 0.0164
-6 2 18 -1.1273 0.0112
-6 2 19 -2.3237 0.0085
-6 3 1 0.1386 -0.0972
-6 3 2 -6.2586 -0.0081
-6 3 3 -7.5920 0.0151
-6 3 4 -2.6107 -0.0179
-6 3 5 1.7679 -0.0153
-6 3 6 0.8682 0.0105
-6 3 7 -3.0571 0.0011
-6 3 8 -6.3016 -0.0163
-6 3 9 -6.5232 -0.0023
-6 3 10 -2.4654 0.0101
-6 3 11 2.8452 -0.0016
-6 3 12 3.3409 -0.0042
-6 3 13 -0.9643 0.0091
-6 3 14 -2.7012 0.0099
-6 3 15 1.7304 0.0027
-6 3 16 6.9315 0.0070
-6 3 17 6.8338 0.0108
-6 3 18 2.3996 0.0047
-6 3 19 -0.9297 0.0011
-6 4 1 0.0207 -0.1275
-6 4 2 -3.1634 -0.0545
-6 4 3 -2.2156 0.0050
-6 4 4 2.1824 -0.0087
-6 4 5 4.2856 -0.0162
-6 4 6 1.5374 0.0130
-6 4 7 -3.0746 0.0133
-6 4 8 -5.9311 -0.0187
-6 4 9 -5.0079 -0.0210
-6 4 10 -0.0888 0.0025
-6 4 11 5.0509 0.0083
-6 4 12 5.0257 0.0071
-6 4 13 0.3288 0.0163
-6 4 14 -2.5503 0.0140
-6 4 15 -0.0177 -0.0017
-6 4 16 4.3736 -0.0064
-6 4 17 5.2748 -0.0042
-6 4 18 1.8209 -0.0071
-6 4 19 -1.9470 -0.0056
-6 5 1 -1.4776 -0.0973
-6 5 2 -1.4179 -0.0699
-6 5 3 1.1556 -0.0008
-6 5 4 4.5488 0.0075
-6 5 5 5.0039 -0.0082
-6 5 6 1.8222 0.0136
-6 5 7 -2.2104 0.0262
-6 5 8 -4.2923 -0.0046
-6 5 9 -2.8819 -0.0215
-6 5 10 1.7749 -0.0003
-6 5 11 6.3469 0.0133
-6 5 12 6.8752 0.0093
-6 5 13 3.5249 0.0114
-6 5 14 0.0988 0.0103
-6 5 15 -0.6778 -0.0029
-6 5 16 0.6480 -0.0096
-6 5 17 1.2807 -0.0104
-6 5 18 -1.2482 -0.0155
-6 5 19 -5.6380 -0.0127
-6 6 1 -1.2989 -0.0182
-6 6 2 0.0145 -0.0430
-6 6 3 1.6375 0.0046
-6 6 4 2.6664 0.0244
-6 6 5 2.0495 -0.0001
-6 6 6 0.1753 0.0002
-6 6 7 -1.5591 0.0175
-6 6 8 -2.1037 0.0043
-6 6 9 -0.8457 -0.0111
-6 6 10 2.0250 0.0048
-6 6 11 4.8304 0.0174
-6 6 12 5.6922 0.0069
-6 6 13 4.2495 -0.0003
-6 6 14 1.4754 -0.0002
-6 6 15 -0.7441 -0.0047
-6 6 16 -0.4691 -0.0049
-6 6 17 1.1619 -0.0030
-6 6 18 -0.3612 -0.0114
-6 6 19 -6.3080 -0.0153
-6 7 1 1.8476 0.0642
-6 7 2 3.3219 0.0016
-6 7 3 2.9333 0.0088
-6 7 4 1.4153 0.0312
-6 7 5 -0.0925 0.0076
-6 7 6 -0.8958 -0.0161
-6 7 7 -0.7390 -0.0072
-6 7 8 0.2245 -0.0016
-6 7 9 1.5432 -0.0061
-6 7 10 2.6848 0.0031
-6 7 11 3.2775 0.0112
-6 7 12 3.0473 0.0017
-6 7 13 1.4254 -0.0063
-6 7 14 -1.6389 -0.0072
-6 7 15 -3.7599 -0.0109
-6 7 16 -1.6346 -0.0087
-6 7 17 3.3220 -0.0003
-6 7 18 4.4288 -0.0036
-6 7 19 -1.3473 -0.0091
-6 8 1 2.6049 0.1109
-6 8 2 3.7416 0.0346
-6 8 3 2.4979 -0.0019
-6 8 4 0.8711 0.0161
-6 8 5 0.1388 0.0086
-6 8 6 0.0332 -0.0230
-6 8 7 0.5427 -0.0238
-6 8 8 1.8312 -0.0038
-6 8 9 3.0261 0.0026
-6 8 10 3.1824 0.0002
-6 8 11 2.6103 -0.0016
-6 8 12 1.4859 -0.0040
-6 8 13 -1.3466 -0.0027
-6 8 14 -5.8197 -0.0032
-6 8 15 -8.2805 -0.0134
-6 8 16 -4.9912 -0.0170
-6 8 17 1.9577 -0.0061
-6 8 18 5.6321 -0.0005
-6 9 1 0.3911 0.1111
-6 9 2 -0.4037 0.0499
-6 9 3 -2.2450 -0.0149
-6 9 4 -2.3557 -0.0096
-6 9 5 -1.0246 0.0001
-6 9 6 -0.2903 -0.0241
-6 9 7 0.1028 -0.0299
-6 9 8 1.2358 -0.0012
-6 9 9 1.9906 0.0164
-6 9 10 1.3220 0.0072
-6 9 11 0.4902 -0.0038
-6 9 12 -0.1742 -0.0022
-6 9 13 -2.7867 0.0050
-6 9 14 -7.3216 0.0031
-6 9 15 -9.6770 -0.0108
-6 9 16 -6.9605 -0.0162
-6 9 17 -1.5729 -0.0028
-6 9 18 1.8325 0.0085
-6 10 1 1.1429 0.0618
-6 10 2 -2.0125 0.0424
-6 10 3 -4.7155 -0.0160
-6 10 4 -4.1602 -0.0231
-6 10 5 -2.4090 -0.0052
-6 10 6 -2.3519 -0.0167
-6 10 7 -2.6004 -0.0277
-6 10 8 -1.2879 -0.0056
-6 10 9 -0.3630 0.0158
-6 10 10 -1.2789 0.0101
-6 10 11 -1.9297 -0.0003
-6 10 12 -1.8018 0.0021
-6 10 13 -3.6198 0.0055
-6 10 14 -7.1438 -0.0017
-6 10 15 -8.2647 -0.0129
-6 10 16 -5.6946 -0.0117
-6 10 17 -2.4326 0.0055
-6 11 1 3.6349 -0.0223
-6 11 2 0.4639 0.0075
-6 11 3 -1.2356 -0.0137
-6 11 4 -0.0818 -0.0260
-6 11 5 0.4418 -0.0066
-6 11 6 -1.9548 0.0014
-6 11 7 -3.9634 -0.0083
-6 11 8 -2.8871 -0.0047
-6 11 9 -1.4059 0.0069
-6 11 10 -1.5372 0.0048
-6 11 11 -1.1872 -0.0022
-6 11 12 -0.3974 -0.0030
-6 11 13 -2.4127 -0.0061
-6 11 14 -6.2691 -0.0132
-6 11 15 -7.1173 -0.0148
-6 11 16 -4.3042 -0.0089
-6 12 1 1.1402 -0.0895
-6 12 2 -0.5073 -0.0286
-6 12 3 0.5078 -0.0085
-6 12 4 3.5343 -0.0256
-6 12 5 4.2701 -0.0148
-6 12 6 1.1973 0.0135
-6 12 7 -1.5855 0.0171
-6 12 8 -1.2774 0.0082
-6 12 9 -0.4020 0.0086
-6 12 10 -0.4251 0.0080
-6 12 11 0.8269 -0.0002
-6 12 12 2.4622 -0.0085
-6 12 13 0.3902 -0.0142
-6 12 14 -4.4247 -0.0114
-6 13 1 -4.1096 -0.0995
-6 13 2 -5.6554 -0.0351
-6 13 3 -3.7981 0.0113
-6 13 4 0.2854 -0.0110
-6 13 5 3.0867 -0.0183
-6 13 6 3.2730 0.0148
-6 13 7 3.0694 0.0275
-6 13 8 3.4365 0.0121
-6 13 9 2.2990 0.0070
-6 13 10 -0.0009 0.0099
-6 13 11 -0.0574 0.0022
-6 13 12 1.6268 -0.0077
-6 14 2 -7.1432 -0.0258
-6 14 3 -7.3551 0.0277
-6 14 4 -4.9354 0.0115
-6 14 5 -0.8272 -0.0069
-6 14 6 3.7408 0.0172
-6 14 7 7.7173 0.0268
-5 -13 1 -5.1622 -0.0009
-5 -12 1 -0.1055 0.0402
-5 -12 2 -0.5524 -0.0191
-5 -12 3 -2.2054 -0.0267
-5 -12 4 -4.0098 0.0071
-5 -11 1 2.8587 0.0750
-5 -11 2 2.4312 0.0252
-5 -11 3 -0.2322 -0.0217
-5 -11 4 -3.3500 -0.0086
-5 -11 5 -5.1664 0.0146
-5 -11 6 -3.0212 0.0064
-5 -11 7 0.9550 -0.0006
-5 -10 1 1.6752 0.0784
-5 -10 2 1.6644 0.0621
-5 -10 3 -0.2523 -0.0047
-5 -10 4 -2.4855 -0.0240
-5 -10 5 -4.2759 0.0037
-5 -10 6 -3.5274 0.0105
-5 -10 7 -1.3954 -0.0011
-5 -10 8 -1.9592 0.0100
-5 -10 9 -3.2764 0.0210
-5 -9 1 -0.5374 0.0399
-5 -9 2 -0.7611 0.0671
-5 -9 3 -2.1019 0.0143
-5 -9 4 -2.7420 -0.0302
-5 -9 5 -2.8648 -0.0142
-5 -9 6 -1.8553 0.0035
-5 -9 7 -0.7019 -0.0069
-5 -9 8 -2.0274 -0.0009
-5 -9 9 -3.5737 0.0196
-5 -9 10 -0.9654 0.0075
-5 -8 1 -0.9317 -0.0272
-5 -8 2 -1.7590 0.0323
-5 -8 3 -2.9819 0.0225
-5 -8 4 -2.4249 -0.0245
-5 -8 5 -0.9625 -0.0260
-5 -8 6 0.5665 -0.0033
-5 -8 7 1.3693 -0.0079
-5 -8 8 0.2420 -0.0119
-5 -8 9 -1.1123 0.0082
-5 -8 10 0.0204 0.0128
-5 -8 11 1.5733 -0.0065
-5 -8 12 0.3296 -0.0092
-5 -7 1 0.4416 -0.0901
-5 -7 2 -0.8679 -0.0266
-5 -7 3 -1.5349 0.0142
-5 -7 4 0.0017 -0.0100
-5 -7 5 1.8812 -0.0237
-5 -7 6 2.5025 -0.0005
-5 -7 7 2.2320 0.0056
-5 -7 8 1.6345 -0.0089
-5 -7 9 1.2804 -0.0026
-5 -7 10 1.5041 0.0116
-5 -7 11 0.9500 0.0028
-5 -7 12 -1.5995 -0.0096
-5 -7 13 -4.3561 -0.0053
-5 -6 1 0.7957 -0.1143
-5 -6 2 -0.0597 -0.0768
-5 -6 3 0.5641 -0.0025
-5 -6 4 2.7786 0.0090
-5 -6 5 4.0089 -0.0084
-5 -6 6 2.9443 0.0075
-5 -6 7 1.4954 0.0239
-5 -6 8 1.4101 0.0075
-5 -6 9 1.8186 -0.0031
-5 -6 10 1.3347 0.0103
-5 -6 11 -0.0959 0.0102
-5 -6 12 -2.2637 -0.0086
-5 -6 13 -5.0519 -0.0088
-5 -6 14 -7.2982 0.0081
-5 -5 1 -1.4566 -0.0813
-5 -5 2 -0.6338 -0.0876
-5 -5 3 1.0869 -0.0142
-5 -5 4 2.7487 0.0273
-5 -5 5 2.6373 0.0118
-5 -5 6 0.8528 0.0087
-5 -5 7 0.0301 0.0256
-5 -5 8 1.2670 0.0171
-5 -5 9 1.8336 -0.0009
-5 -5 10 -0.0763 0.0082
-5 -5 11 -2.2406 0.0160
-5 -5 12 -3.1458 -0.0044
-5 -5 13 -4.3928 -0.0141
-5 -5 14 -5.9138 0.0069
-5 -5 15 -5.3532 0.0144
-5 -5 16 -3.3613 -0.0047
-5 -4 1 -2.9518 0.0003
-5 -4 2 -0.3195 -0.0499
-5 -4 3 1.0357 -0.0148
-5 -4 4 0.5459 0.0363
-5 -4 5 -1.1396 0.0279
-5 -4 6 -2.4307 0.0019
-5 -4 7 -1.2676 0.0061
-5 -4 8 1.7108 0.0079
-5 -4 9 2.3952 -0.0082
-5 -4 10 -0.5488 -0.0046
-5 -4 11 -3.1955 0.0128
-5 -4 12 -3.7181 0.0036
-5 -4 13 -4.6220 -0.0132
-5 -4 14 -5.2759 -0.0019
-5 -4 15 -2.4779 0.0085
-5 -4 16 1.0565 -0.0050
-5 -4 17 0.1692 -0.0056
-5 -3 1 -0.4687 0.0930
-5 -3 2 3.0147 0.0172
-5 -3 3 2.5061 -0.0091
-5 -3 4 -0.3358 0.0267
-5 -3 5 -2.5249 0.0319
-5 -3 6 -2.6683 -0.0040
-5 -3 7 -0.4571 -0.0148
-5 -3 8 2.5147 -0.0048
-5 -3 9 2.7763 -0.0158
-5 -3 10 0.2574 -0.0232
-5 -3 11 -1.0979 -0.0023
-5 -3 12 -1.2404 0.0097
-5 -3 13 -3.7257 -0.0016
-5 -3 14 -6.2711 -0.0027
-5 -3 15 -3.8805 0.0045
-5 -3 16 -0.0210 -0.0024
-5 -3 17 -0.8518 -0.0043
-5 -2 1 3.7655 0.1449
-5 -2 2 6.9142 0.0756
-5 -2 3 3.8736 -0.0054
-5 -2 4 -0.1163 -0.0014
-5 -2 5 -0.7876 0.0187
-5 -2 6 1.0180 -0.0075
-5 -2 7 3.2210 -0.0237
-5 -2 8 4.3826 -0.0043
-5 -2 9 3.1243 -0.0047
-5 -2 10 1.1075 -0.0253
-5 -2 11 1.8297 -0.0155
-5 -2 12 3.1671 0.0105
-5 -2 13 0.1333 0.0112
-5 -2 14 -4.5773 0.0027
-5 -2 15 -5.1669 0.0055
-5 -2 16 -4.4688 0.0047
-5 -2 17 -6.9904 -0.0001
-5 -2 18 -7.4997 0.0025
-5 -1 1 7.1999 0.1212
-5 -1 2 8.8578 0.0928
-5 -1 3 2.9677 -0.0047
-5 -1 4 -1.6098 -0.0317
-5 -1 5 -0.2477 -0.0046
-5 -1 6 3.6202 -0.0124
-5 -1 7 6.1824 -0.0276
-5 -1 8 6.4509 -0.0011
-5 -1 9 4.1852 0.0164
-5 -1 10 1.6940 -0.0061
-5 -1 11 2.5848 -0.0144
-5 -1 12 4.6974 0.0079
-5 -1 13 2.9364 0.0148
-5 -1 14 -0.8129 0.0013
-5 -1 15 -2.1314 -0.0008
-5 -1 16 -4.0406 0.0052
-5 -1 17 -9.3816 0.0031
-5 -1 18 -11.3145 -0.0006
-5 -1 19 -4.5463 -0.0005
-5 0 1 9.9987 0.0314
-5 0 2 9.4916 0.0627
-5 0 3 1.0915 -0.0013
-5 0 4 -4.0817 -0.0413
-5 0 5 -1.9174 -0.0178
-5 0 6 2.4421 -0.0108
-5 0 7 5.0977 -0.0267
-5 0 8 5.9136 -0.0071
-5 0 9 4.4093 0.0233
-5 0 10 1.8225 0.0122
-5 0 11 1.5554 -0.0081
-5 0 12 2.6859 0.0006
-5 0 13 1.4783 0.0076
-5 0 14 -0.3192 -0.0074
-5 0 15 0.5369 -0.0151
-5 0 16 0.3447 -0.0052
-5 0 17 -4.4061 0.0008
-5 0 18 -8.2737 -0.0017
-5 0 19 -5.6631 -0.0040
-5 1 1 10.2713 -0.0719
-5 1 2 7.5803 0.0082
-5 1 3 -1.7573 0.0071
-5 1 4 -6.1121 -0.0250
-5 1 5 -3.0668 -0.0115
-5 1 6 0.7393 0.0063
-5 1 7 2.1152 -0.0081
-5 1 8 2.5038 -0.0083
-5 1 9 1.7723 0.0170
-5 1 10 0.2123 0.0181
-5 1 11 0.2898 -0.0057
-5 1 12 1.0714 -0.0116
-5 1 13 -0.6152 -0.0041
-5 1 14 -2.5513 -0.0113
-5 1 15 -0.6731 -0.0209
-5 1 16 2.2626 -0.0138
-5 1 17 1.3108 -0.0031
-5 1 18 -2.0560 -0.0011
-5 1 19 -3.5803 -0.0019
-5 1 20 -2.6101 -0.0054
-5 2 1 6.3225 -0.1283
-5 2 2 1.4472 -0.0375
-5 2 3 -7.3093 0.0163
-5 2 4 -9.0378 0.0013
-5 2 5 -3.6798 0.0003
-5 2 6 0.4394 0.0244
-5 2 7 0.3676 0.0207
-5 2 8 -0.9773 0.0029
-5 2 9 -2.2807 0.0107
-5 2 10 -2.8419 0.0192
-5 2 11 -1.0065 -0.0001
-5 2 12 1.1901 -0.0171
-5 2 13 -0.1074 -0.0102
-5 2 14 -2.8413 -0.0043
-5 2 15 -1.8757 -0.0101
-5 2 16 2.0306 -0.0095
-5 2 17 3.8449 -0.0019
-5 2 18 1.8382 0.0005
-5 2 19 -1.7252 0.0023
-5 2 20 -3.9879 0.0062
-5 3 1 2.0318 -0.1149
-5 3 2 -4.3381 -0.0577
-5 3 3 -11.6696 0.0176
-5 3 4 -10.8856 0.0196
-5 3 5 -3.8818 0.0034
-5 3 6 0.4890 0.0236
-5 3 7 -0.3271 0.0338
-5 3 8 -2.6638 0.0085
-5 3 9 -4.2409 -0.0031
-5 3 10 -4.0663 0.0103
-5 3 11 -1.2319 0.0072
-5 3 12 1.7397 -0.0096
-5 3 13 1.1429 -0.0057
-5 3 14 -1.3683 0.0077
-5 3 15 -1.1042 0.0054
-5 3 16 2.2056 -0.0006
-5 3 17 4.6456 0.0016
-5 3 18 3.5216 0.0029
-5 3 19 -0.4507 0.0048
-5 3 20 -4.1370 0.0120
-5 4 1 0.4505 -0.0522
-5 4 2 -5.1005 -0.0568
-5 4 3 -9.5877 0.0043
-5 4 4 -7.1516 0.0228
-5 4 5 -0.9140 0.0002
-5 4 6 1.7698 0.0090
-5 4 7 -0.0969 0.0283
-5 4 8 -2.4046 0.0045
-5 4 9 -2.9441 -0.0251
-5 4 10 -1.5815 -0.0142
-5 4 11 1.3024 0.0029
-5 4 12 3.4154 -0.0012
-5 4 13 2.4852 0.0012
-5 4 14 0.0368 0.0145
-5 4 15 -0.6858 0.0124
-5 4 16 0.9245 0.0015
-5 4 17 2.9476 0.0008
-5 4 18 3.1079 0.0034
-5 4 19 0.3892 0.0052
-5 4 20 -3.3483 0.0092
-5 5 1 -0.9070 0.0259
-5 5 2 -3.7765 -0.0386
-5 5 3 -4.4886 -0.0154
-5 5 4 -0.8382 0.0142
-5 5 5 3.6802 -0.0031
-5 5 6 4.2287 -0.0065
-5 5 7 1.4035 0.0178
-5 5 8 -0.7975 0.0072
-5 5 9 -0.5091 -0.0295
-5 5 10 1.7016 -0.0295
-5 5 11 4.5136 -0.0039
-5 5 12 6.0544 0.0030
-5 5 13 5.1558 0.0034
-5 5 14 2.5756 0.0128
-5 5 15 -0.1488 0.0121
-5 5 16 -1.6548 0.0015
-5 5 17 -1.0769 0.0001
-5 5 18 0.2559 0.0028
-5 5 19 -0.6588 0.0028
-5 5 20 -3.8937 0.0035
-5 6 1 -2.0977 0.0866
-5 6 2 -2.7206 -0.0036
-5 6 3 -1.5025 -0.0212
-5 6 4 1.5536 0.0069
-5 6 5 4.2071 -0.0028
-5 6 6 4.1465 -0.0198
-5 6 7 2.0697 0.0008
-5 6 8 0.4762 0.0116
-5 6 9 0.6729 -0.0118
-5 6 10 2.3048 -0.0185
-5 6 11 4.3806 0.0026
-5 6 12 5.9242 0.0105
-5 6 13 6.2289 0.0050
-5 6 14 4.6750 0.0079
-5 6 15 1.2207 0.0095
-5 6 16 -2.1326 0.0043
-5 6 17 -2.6339 0.0047
-5 6 18 -1.0948 0.0052
-5 6 19 -1.6425 -0.0004
-5 6 20 -5.2040 -0.0017
-5 7 1 -0.0087 0.0987
-5 7 2 0.8528 0.0317
-5 7 3 1.4470 -0.0091
-5 7 4 1.5004 0.0082
-5 7 5 1.4885 0.0064
-5 7 6 1.3204 -0.0225
-5 7 7 0.8277 -0.0200
-5 7 8 0.4883 0.0020
-5 7 9 0.7533 0.0007
-5 7 10 1.3046 -0.0044
-5 7 11 1.7117 0.0077
-5 7 12 2.1684 0.0132
-5 7 13 2.6364 0.0055
-5 7 14 2.0530 0.0029
-5 7 15 -0.0279 0.0029
-5 7 16 -1.6591 0.0002
-5 7 17 -0.7228 0.0033
-5 7 18 1.2047 0.0047
-5 7 19 0.2421 -0.0032
-5 7 20 -3.8046 -0.0047
-5 8 1 2.5996 0.0587
-5 8 2 4.8488 0.0461
-5 8 3 4.6036 0.0027
-5 8 4 2.2626 0.0065
-5 8 5 0.4473 0.0182
-5 8 6 -0.0143 -0.0069
-5 8 7 -0.0113 -0.0246
-5 8 8 0.2949 -0.0089
-5 8 9 1.0573 0.0032
-5 8 10 1.3223 -0.0012
-5 8 11 0.4366 -0.0016
-5 8 12 -0.7744 0.0013
-5 8 13 -1.8124 -0.0003
-5 8 14 -3.1753 -0.0023
-5 8 15 -4.2293 -0.0073
-5 8 16 -3.1643 -0.0142
-5 8 17 -0.0194 -0.0109
-5 8 18 2.4476 -0.0037
-5 8 19 1.8606 -0.0059
-5 9 1 1.1962 0.0025
-5 9 2 3.2772 0.0407
-5 9 3 2.5514 0.0055
-5 9 4 0.5196 -0.0057
-5 9 5 -0.1531 0.0189
-5 9 6 0.0828 0.0144
-5 9 7 -0.2001 -0.0107
-5 9 8 -0.1663 -0.0078
-5 9 9 0.9020 0.0086
-5 9 10 1.4040 0.0059
-5 9 11 0.4299 -0.0050
-5 9 12 -0.9495 -0.0061
-5 9 13 -2.6371 -0.0019
-5 9 14 -5.0793 -0.0019
-5 9 15 -6.2953 -0.0106
-5 9 16 -4.3292 -0.0209
-5 9 17 -1.1214 -0.0173
-5 9 18 0.2557 -0.0043
-5 9 19 -0.1362 0.0006
-5 10 1 -0.7597 -0.0372
-5 10 2 -1.0661 0.0257
-5 10 3 -3.0506 0.0069
-5 10 4 -3.8766 -0.0155
-5 10 5 -2.3322 0.0100
-5 10 6 -1.1444 0.0249
-5 10 7 -1.8433 0.0028
-5 10 8 -2.0626 -0.0079
-5 10 9 -0.6873 0.0067
-5 10 10 0.0740 0.0126
-5 10 11 -0.3525 0.0048
-5 10 12 -0.5047 0.0033
-5 10 13 -1.3695 0.0075
-5 10 14 -4.0842 0.0057
-5 10 15 -5.5454 -0.0029
-5 10 16 -3.3375 -0.0090
-5 10 17 -0.7272 -0.0023
-5 10 18 -0.9412 0.0129
-5 11 1 0.7954 -0.0593
-5 11 2 -1.2867 -0.0020
-5 11 3 -3.9715 0.0059
-5 11 4 -4.0089 -0.0141
-5 11 5 -1.9729 0.0003
-5 11 6 -1.6905 0.0238
-5 11 7 -3.5004 0.0112
-5 11 8 -3.6426 -0.0103
-5 11 9 -1.5037 -0.0066
-5 11 10 -0.2153 0.0048
-5 11 11 0.0455 0.0064
-5 11 12 0.9220 0.0067
-5 11 13 0.1928 0.0076
-5 11 14 -3.7531 0.0047
-5 11 15 -6.2661 0.0031
-5 11 16 -3.7068 0.0062
-5 11 17 0.0015 0.0128
-5 12 1 1.5283 -0.0646
-5 12 2 0.1217 -0.0356
-5 12 3 -0.9253 -0.0000
-5 12 4 0.2996 -0.0070
-5 12 5 1.6925 -0.0110
-5 12 6 0.1394 0.0109
-5 12 7 -2.6519 0.0167
-5 12 8 -2.3280 -0.0020
-5 12 9 0.5505 -0.0091
-5 12 10 2.1841 -0.0003
-5 12 11 2.8909 0.0025
-5 12 12 4.2066 -0.0030
-5 12 13 2.7989 -0.0085
-5 12 14 -3.2665 -0.0085
-5 12 15 -8.1260 0.0013
-5 13 1 -2.0411 -0.0435
-5 13 2 -2.3997 -0.0489
-5 13 3 -1.3870 0.0011
-5 13 4 0.9829 0.0068
-5 13 5 2.1080 -0.0176
-5 13 6 0.5828 -0.0084
-5 13 7 -0.8461 0.0120
-5 13 8 0.8318 0.0057
-5 13 9 3.4861 -0.0024
-5 13 10 3.7738 0.0059
-5 13 11 3.4792 0.0077
-5 13 12 4.7502 -0.0046
-5 13 13 3.9482 -0.0140
-5 14 1 -4.8000 -0.0018
-5 14 2 -5.5023 -0.0340
-5 14 3 -4.6863 0.0105
-5 14 4 -3.1852 0.0267
-5 14 5 -2.3568 -0.0056
-5 14 6 -1.7431 -0.0140
-5 14 7 0.4624 0.0014
-5 14 8 4.0284 -0.0032
-5 14 9 5.2763 -0.0102
-5 14 10 2.3383 0.0016
-4 -13 1 -2.7370 0.0742
-4 -13 2 -0.7175 0.0136
-4 -13 3 0.2799 -0.0141
-4 -12 1 -1.1498 0.0746
-4 -12 2 0.6158 0.0281
-4 -12 3 -0.0706 -0.0229
-4 -12 4 -2.4071 -0.0156
-4 -12 5 -4.5408 0.0014
-4 -12 6 -3.8933 -0.0102
-4 -11 1 1.4916 0.0421
-4 -11 2 3.4897 0.0370
-4 -11 3 1.6560 -0.0143
-4 -11 4 -2.1334 -0.0313
-4 -11 5 -5.5839 -0.0101
-4 -11 6 -6.1554 -0.0032
-4 -11 7 -2.6308 -0.0088
-4 -11 8 1.0652 0.0026
-4 -10 1 1.5298 -0.0151
-4 -10 2 4.0117 0.0309
-4 -10 3 2.5323 0.0073
-4 -10 4 -1.0839 -0.0287
-4 -10 5 -4.7483 -0.0181
-4 -10 6 -6.2639 0.0029
-4 -10 7 -4.1004 -0.0020
-4 -10 8 -1.3717 -0.0028
-4 -10 9 -1.2943 0.0136
-4 -10 10 -0.9645 0.0111
-4 -9 1 -0.2475 -0.0705
-4 -9 2 2.0415 0.0089
-4 -9 3 1.0829 0.0289
-4 -9 4 -1.3216 -0.0086
-4 -9 5 -3.4356 -0.0171
-4 -9 6 -4.1455 0.0059
-4 -9 7 -2.7348 0.0043
-4 -9 8 -1.5580 -0.0082
-4 -9 9 -2.4590 0.0074
-4 -9 10 -2.2480 0.0208
-4 -9 11 0.7458 0.0021
-4 -8 1 -1.5955 -0.0924
-4 -8 2 -0.1531 -0.0193
-4 -8 3 -1.1058 0.0365
-4 -8 4 -2.2740 0.0165
-4 -8 5 -2.2461 -0.0079
-4 -8 6 -1.3463 0.0068
-4 -8 7 -0.0995 0.0107
-4 -8 8 0.0174 -0.0086
-4 -8 9 -1.3845 -0.0030
-4 -8 10 -1.5665 0.0208
-4 -8 11 0.2911 0.0150
-4 -8 12 0.6835 -0.0073
-4 -8 13 -1.0716 -0.0061
-4 -7 1 -1.6611 -0.0695
-4 -7 2 -1.2139 -0.0439
-4 -7 3 -1.9152 0.0195
-4 -7 4 -1.8198 0.0274
-4 -7 5 -0.5113 0.0004
-4 -7 6 0.5542 0.0034
-4 -7 7 0.7435 0.0149
-4 -7 8 0.3531 -0.0023
-4 -7 9 0.0461 -0.0126
-4 -7 10 0.6584 0.0088
-4 -7 11 1.3252 0.0195
-4 -7 12 -0.1232 0.0002
-4 -7 13 -2.8925 -0.0110
-4 -7 14 -3.3702 -0.0018
-4 -6 1 -1.8391 -0.0149
-4 -6 2 -1.4966 -0.0540
-4 -6 3 -0.7704 -0.0147
-4 -6 4 0.7290 0.0180
-4 -6 5 1.8745 0.0020
-4 -6 6 1.1040 -0.0054
-4 -6 7 -0.8209 0.0122
-4 -6 8 -1.4530 0.0072
-4 -6 9 0.1259 -0.0144
-4 -6 10 2.2169 -0.0062
-4 -6 11 2.4735 0.0142
-4 -6 12 0.1849 0.0044
-4 -6 13 -3.1216 -0.0121
-4 -6 14 -4.8977 -0.0010
-4 -6 15 -3.7427 0.0088
-4 -5 1 -4.2426 0.0464
-4 -5 2 -2.1539 -0.0381
-4 -5 3 0.9329 -0.0402
-4 -5 4 3.1410 0.0025
-4 -5 5 2.8759 0.0035
-4 -5 6 0.1085 -0.0129
-4 -5 7 -2.7240 0.0017
-4 -5 8 -2.5673 0.0124
-4 -5 9 0.3433 -0.0070
-4 -5 10 2.4775 -0.0116
-4 -5 11 1.8982 0.0093
-4 -5 12 -0.0060 0.0076
-4 -5 13 -1.9815 -0.0134
-4 -5 14 -3.6931 -0.0056
-4 -5 15 -3.5541 0.0146
-4 -5 16 -0.7527 0.0027
-4 -4 1 -7.0047 0.0901
-4 -4 2 -1.8874 0.0037
-4 -4 3 2.7682 -0.0375
-4 -4 4 3.5832 -0.0055
-4 -4 5 0.9205 0.0110
-4 -4 6 -2.4666 -0.0102
-4 -4 7 -3.6087 -0.0109
-4 -4 8 -1.1600 0.0066
-4 -4 9 2.4466 -0.0006
-4 -4 10 3.0395 -0.0105
-4 -4 11 0.6376 0.0065
-4 -4 12 -1.1631 0.0125
-4 -4 13 -1.7601 -0.0099
-4 -4 14 -2.7091 -0.0138
-4 -4 15 -2.2777 0.0072
-4 -4 16 0.9793 0.0079
-4 -4 17 3.0317 -0.0030
-4 -3 1 -5.4351 0.1005
-4 -3 2 2.6978 0.0544
-4 -3 3 6.7911 -0.0109
-4 -3 4 4.0426 -0.0080
-4 -3 5 -1.2839 0.0176
-4 -3 6 -4.1422 0.0031
-4 -3 7 -2.8232 -0.0154
-4 -3 8 1.4808 -0.0048
-4 -3 9 5.0252 -0.0013
-4 -3 10 4.2911 -0.0125
-4 -3 11 0.9644 -0.0037
-4 -3 12 -0.8651 0.0108
-4 -3 13 -1.8794 -0.0019
-4 -3 14 -4.1797 -0.0152
-4 -3 15 -4.5574 -0.0042
-4 -3 16 -0.6929 0.0034
-4 -3 17 2.1550 -0.0019
-4 -3 18 -0.0404 0.0035
-4 -2 1 0.0921 0.0727
-4 -2 2 10.6265 0.0871
-4 -2 3 12.4902 0.0205
-4 -2 4 5.7829 -0.0126
-4 -2 5 -0.9347 0.0125
-4 -2 6 -2.3279 0.0165
-4 -2 7 0.4542 -0.0084
-4 -2 8 4.3848 -0.0090
-4 -2 9 6.3998 0.0016
-4 -2 10 4.7799 -0.0098
-4 -2 11 2.1349 -0.0162
-4 -2 12 1.4349 -0.0007
-4 -2 13 -0.0133 0.0037
-4 -2 14 -4.6937 -0.0079
-4 -2 15 -7.8712 -0.0083
-4 -2 16 -5.7493 -0.0015
-4 -2 17 -2.9135 -0.0044
-4 -2 18 -3.1572 -0.0081
-4 -2 19 -2.8126 -0.0063
-4 -1 1 4.4554 0.0107
-4 -1 2 16.3210 0.0776
-4 -1 3 15.2076 0.0377
-4 -1 4 5.3756 -0.0181
-4 -1 5 -1.0398 -0.0042
-4 -1 6 -0.0201 0.0174
-4 -1 7 4.0039 -0.0012
-4 -1 8 6.9840 -0.0081
-4 -1 9 7.0936 0.0109
-4 -1 10 4.1628 0.0073
-4 -1 11 1.5709 -0.0132
-4 -1 12 1.9704 -0.0091
-4 -1 13 1.7469 0.0053
-4 -1 14 -2.4150 0.0014
-4 -1 15 -6.4752 -0.0056
-4 -1 16 -6.6467 -0.0016
-4 -1 17 -5.9120 -0.0016
-4 -1 18 -6.2280 -0.0096
-4 -1 19 -4.3213 -0.0102
-4 -1 20 0.1588 0.0002
-4 0 1 5.6459 -0.0701
-4 0 2 17.2156 0.0201
-4 0 3 12.9414 0.0309
-4 0 4 0.8169 -0.0169
-4 0 5 -4.8358 -0.0185
-4 0 6 -1.6486 0.0074
-4 0 7 3.7414 -0.0028
-4 0 8 7.0759 -0.0145
-4 0 9 6.9927 0.0092
-4 0 10 3.2387 0.0225
-4 0 11 -0.6666 0.0027
-4 0 12 -1.0458 -0.0072
-4 0 13 -0.2292 0.0048
-4 0 14 -1.5076 0.0062
-4 0 15 -2.7618 -0.0034
-4 0 16 -2.0810 -0.0018
-4 0 17 -2.1258 0.0036
-4 0 18 -3.7631 -0.0024
-4 0 19 -3.8446 -0.0069
-4 0 20 -1.6528 0.0020
-4 1 1 4.9372 -0.1332
-4 1 2 14.4531 -0.0568
-4 1 3 7.6795 0.0068
-4 1 4 -5.0991 -0.0055
-4 1 5 -9.4216 -0.0174
-4 1 6 -4.9149 0.0010
-4 1 7 0.7324 -0.0021
-4 1 8 4.1814 -0.0205
-4 1 9 4.8372 -0.0065
-4 1 10 1.8096 0.0186
-4 1 11 -2.3474 0.0125
-4 1 12 -3.7824 -0.0033
-4 1 13 -3.3777 0.0004
-4 1 14 -3.3498 0.0050
-4 1 15 -2.2512 -0.0034
-4 1 16 0.6601 -0.0055
-4 1 17 2.4562 0.0023
-4 1 18 1.5547 0.0017
-4 1 19 -0.4920 -0.0048
-4 1 20 -2.3821 -0.0031
-4 1 21 -2.9275 0.0002
-4 2 1 2.9115 -0.1331
-4 2 2 8.6441 -0.0998
-4 2 3 0.3831 -0.0123
-4 2 4 -10.5723 0.0127
-4 2 5 -11.6394 -0.0032
-4 2 6 -5.3288 0.0037
-4 2 7 -0.3294 0.0108
-4 2 8 1.4753 -0.0079
-4 2 9 1.5188 -0.0140
-4 2 10 -0.4069 0.0073
-4 2 11 -2.8208 0.0155
-4 2 12 -3.3186 0.0003
-4 2 13 -2.9787 -0.0054
-4 2 14 -3.3971 0.0017
-4 2 15 -2.9376 -0.0004
-4 2 16 -0.4785 -0.0069
-4 2 17 2.0934 -0.0047
-4 2 18 2.9210 -0.0029
-4 2 19 1.3473 -0.0062
-4 2 20 -2.4218 -0.0049
-4 2 21 -5.5215 -0.0026
-4 3 1 1.0209 -0.0568
-4 3 2 2.0241 -0.0768
-4 3 3 -7.0011 -0.0114
-4 3 4 -14.8549 0.0289
-4 3 5 -11.9457 0.0112
-4 3 6 -3.5278 0.0044
-4 3 7 1.0172 0.0212
-4 3 8 0.9210 0.0136
-4 3 9 -0.4365 -0.0075
-4 3 10 -1.9629 0.0007
-4 3 11 -2.7344 0.0178
-4 3 12 -1.7630 0.0079
-4 3 13 -0.5407 -0.0064
-4 3 14 -0.6067 0.0002
-4 3 15 -1.0534 0.0063
-4 3 16 -0.9052 -0.0021
-4 3 17 -0.2706 -0.0088
-4 3 18 0.6305 -0.0085
-4 3 19 0.4238 -0.0068
-4 3 20 -2.5869 -0.0004
-4 3 21 -6.4704 0.0056
-4 4 1 1.1625 0.0546
-4 4 2 -1.3251 -0.0100
-4 4 3 -9.5605 -0.0018
-4 4 4 -14.2292 0.0308
-4 4 5 -9.2681 0.0167
-4 4 6 -0.9199 -0.0031
-4 4 7 2.6058 0.0140
-4 4 8 1.5601 0.0212
-4 4 9 -0.1312 -0.0041
-4 4 10 -1.2249 -0.0110
-4 4 11 -1.5647 0.0092
-4 4 12 -0.7702 0.0096
-4 4 13 0.5064 -0.0068
-4 4 14 1.3341 -0.0032
-4 4 15 1.2457 0.0084
-4 4 16 -0.1038 0.0025
-4 4 17 -1.6661 -0.0076
-4 4 18 -1.4636 -0.0072
-4 4 19 -0.4129 -0.0021
-4 4 20 -1.7473 0.0052
-4 4 21 -5.2470 0.0099
-4 5 1 1.7641 0.1384
-4 5 2 -1.7208 0.0510
-4 5 3 -6.8671 -0.0029
-4 5 4 -8.0413 0.0123
-4 5 5 -2.9323 0.0117
-4 5 6 3.0211 -0.0130
-4 5 7 4.4807 -0.0036
-4 5 8 2.7275 0.0162
-4 5 9 1.2915 -0.0024
-4 5 10 0.9005 -0.0228
-4 5 11 0.8008 -0.0097
-4 5 12 0.8771 -0.0003
-4 5 13 1.4167 -0.0119
-4 5 14 2.2562 -0.0113
-4 5 15 2.0771 0.0022
-4 5 16 -0.2797 0.0023
-4 5 17 -2.9710 -0.0035
-4 5 18 -2.7693 0.0002
-4 5 19 -0.4617 0.0058
-4 5 20 -0.2812 0.0082
-4 5 21 -3.1211 0.0061
-4 6 1 0.9089 0.1509
-4 6 2 -2.1342 0.0735
-4 6 3 -3.8792 -0.0132
-4 6 4 -2.4423 -0.0134
-4 6 5 1.8948 0.0017
-4 6 6 5.5427 -0.0192
-4 6 7 5.7078 -0.0198
-4 6 8 3.5789 0.0095
-4 6 9 1.8966 0.0093
-4 6 10 1.5879 -0.0145
-4 6 11 1.8860 -0.0144
-4 6 12 2.2116 -0.0040
-4 6 13 2.8191 -0.0102
-4 6 14 3.5438 -0.0127
-4 6 15 2.8568 -0.0016
-4 6 16 -0.0762 0.0041
-4 6 17 -2.9113 0.0050
-4 6 18 -2.5847 0.0103
-4 6 19 -0.1145 0.0116
-4 6 20 0.4612 0.0077
-4 6 21 -1.8548 0.0031
-4 7 1 0.5042 0.0822
-4 7 2 -1.2757 0.0522
-4 7 3 -1.4717 -0.0178
-4 7 4 -0.4317 -0.0249
-4 7 5 1.5472 -0.0021
-4 7 6 3.5228 -0.0160
-4 7 7 3.9577 -0.0280
-4 7 8 2.5055 -0.0003
-4 7 9 0.7149 0.0188
-4 7 10 0.0251 0.0044
-4 7 11 0.2011 -0.0043
-4 7 12 0.6052 0.0031
-4 7 13 1.3820 0.0026
-4 7 14 2.2956 -0.0011
-4 7 15 2.1744 0.0043
-4 7 16 0.7587 0.0103
-4 7 17 -0.3929 0.0137
-4 7 18 0.0327 0.0166
-4 7 19 1.1321 0.0111
-4 7 20 0.9232 0.0023
-4 7 21 -0.8223 0.0016
-4 8 1 1.2368 -0.0331
-4 8 2 1.9544 0.0035
-4 8 3 2.3240 -0.0125
-4 8 4 1.2178 -0.0188
-4 8 5 0.0401 0.0036
-4 8 6 0.3582 0.0022
-4 8 7 1.0667 -0.0171
-4 8 8 0.4652 -0.0072
-4 8 9 -0.7329 0.0143
-4 8 10 -1.2319 0.0092
-4 8 11 -1.5230 -0.0038
-4 8 12 -2.1547 -0.0003
-4 8 13 -2.4578 0.0065
-4 8 14 -2.1548 0.0072
-4 8 15 -1.5293 0.0081
-4 8 16 -0.3429 0.0093
-4 8 17 1.1445 0.0103
-4 8 18 1.7000 0.0101
-4 8 19 1.1233 0.0017
-4 8 20 0.5324 -0.0085
-4 9 1 0.1018 -0.1222
-4 9 2 2.9937 -0.0365
-4 9 3 3.9590 -0.0007
-4 9 4 2.1667 -0.0077
-4 9 5 0.2071 0.0085
-4 9 6 0.1156 0.0264
-4 9 7 0.4523 0.0123
-4 9 8 -0.3242 -0.0005
-4 9 9 -0.9799 0.0067
-4 9 10 -0.7320 0.0050
-4 9 11 -1.0397 -0.0095
-4 9 12 -2.3372 -0.0119
-4 9 13 -3.4519 -0.0022
-4 9 14 -4.0737 0.0033
-4 9 15 -3.8724 0.0021
-4 9 16 -1.8691 -0.0010
-4 9 17 0.4274 -0.0027
-4 9 18 -0.0177 -0.0028
-4 9 19 -2.2613 -0.0083
-4 9 20 -2.4621 -0.0175
-4 10 1 -2.5495 -0.1302
-4 10 2 -0.1197 -0.0402
-4 10 3 0.3349 0.0151
-4 10 4 -0.5352 0.0017
-4 10 5 -0.3223 0.0053
-4 10 6 1.0165 0.0369
-4 10 7 0.9711 0.0358
-4 10 8 -0.6784 0.0082
-4 10 9 -1.2694 -0.0010
-4 10 10 -0.4576 0.0021
-4 10 11 -0.3414 -0.0035
-4 10 12 -0.8514 -0.0067
-4 10 13 -0.9321 -0.0001
-4 10 14 -1.4960 0.0035
-4 10 15 -2.2309 0.0001
-4 10 16 -0.9525 -0.0036
-4 10 17 0.7500 -0.0047
-4 10 18 -1.1130 -0.0032
-4 10 19 -4.9612 -0.0044
-4 11 1 -2.2859 -0.0683
-4 11 2 -1.8028 -0.0188
-4 11 3 -2.9271 0.0258
-4 11 4 -3.1549 0.0099
-4 11 5 -0.9765 -0.0011
-4 11 6 1.2631 0.0264
-4 11 7 0.5534 0.0350
-4 11 8 -1.6480 0.0047
-4 11 9 -1.8697 -0.0153
-4 11 10 -0.6523 -0.0072
-4 11 11 -0.2671 0.0028
-4 11 12 0.1631 0.0066
-4 11 13 1.1414 0.0103
-4 11 14 0.2743 0.0102
-4 11 15 -1.7605 0.0074
-4 11 16 -0.9501 0.0074
-4 11 17 1.6171 0.0076
-4 11 18 0.8353 0.0071
-4 12 1 0.7355 0.0091
-4 12 2 0.8267 -0.0020
-4 12 3 -0.6307 0.0208
-4 12 4 -0.7254 0.0156
-4 12 5 0.9723 -0.0061
-4 12 6 1.6218 0.0022
-4 12 7 -0.2821 0.0167
-4 12 8 -1.7901 0.0000
-4 12 9 -0.3518 -0.0207
-4 12 10 1.6474 -0.0151
-4 12 11 1.8794 -0.0002
-4 12 12 2.0338 0.0051
-4 12 13 2.1629 0.0047
-4 12 14 -0.7459 0.0042
-4 12 15 -4.9450 0.0072
-4 12 16 -4.6877 0.0129
-4 12 17 -0.4711 0.0115
-4 13 1 1.5096 0.0587
-4 13 2 2.9083 -0.0005
-4 13 3 3.0789 0.0046
-4 13 4 3.1988 0.0177
-4 13 5 2.5935 -0.0073
-4 13 6 0.2201 -0.0221
-4 13 7 -2.2912 -0.0048
-4 13 8 -1.4367 0.0023
-4 13 9 2.6571 -0.0082
-4 13 10 5.3815 -0.0069
-4 13 11 4.8517 0.0027
-4 13 12 3.9011 0.0013
-4 13 13 2.8113 -0.0057
-4 13 14 -1.2667 -0.0067
-4 13 15 -6.3540 -0.0011
-4 14 1 -0.7849 0.0689
-4 14 2 1.3883 -0.0041
-4 14 3 3.1973 -0.0111
-4 14 4 3.2262 0.0162
-4 14 5 0.0657 -0.0008
-4 14 6 -4.5358 -0.0286
-4 14 7 -6.1721 -0.0171
-4 14 8 -2.3996 0.0000
-4 14 9 3.3315 -0.0036
-4 14 10 5.2153 -0.0024
-4 14 11 2.9001 0.0074
-4 14 12 0.8574 0.0067
-3 -14 1 6.6612 0.0523
-3 -13 1 2.0850 0.0802
-3 -13 2 4.0365 0.0610
-3 -13 3 4.0573 0.0034
-3 -13 4 1.0906 -0.0035
-3 -12 1 -1.4659 0.0590
-3 -12 2 1.8209 0.0656
-3 -12 3 2.3725 0.0072
-3 -12 4 -0.1346 -0.0203
-3 -12 5 -2.8341 0.0014
-3 -12 6 -3.8232 0.0066
-3 -12 7 -2.4157 -0.0085
-3 -11 1 -1.6434 0.0036
-3 -11 2 1.6812 0.0378
-3 -11 3 1.6678 0.0104
-3 -11 4 -1.1742 -0.0253
-3 -11 5 -3.4837 -0.0166
-3 -11 6 -4.2776 0.0010
-3 -11 7 -3.1655 -0.0047
-3 -11 8 -0.2375 -0.0051
-3 -11 9 1.9915 0.0075
-3 -10 1 -0.6506 -0.0675
-3 -10 2 2.3293 -0.0138
-3 -10 3 2.0187 0.0126
-3 -10 4 -0.9614 -0.0107
-3 -10 5 -3.2604 -0.0202
-3 -10 6 -4.2514 -0.0005
-3 -10 7 -3.6726 0.0043
-3 -10 8 -1.2942 -0.0061
-3 -10 9 0.5765 0.0000
-3 -10 10 0.7545 0.0091
-3 -10 11 1.3291 -0.0033
-3 -9 1 0.0588 -0.1193
-3 -9 2 2.4732 -0.0663
-3 -9 3 2.0721 0.0093
-3 -9 4 -0.6329 0.0138
-3 -9 5 -2.4286 -0.0095
-3 -9 6 -2.8574 0.0014
-3 -9 7 -2.3117 0.0128
-3 -9 8 -1.0201 -0.0058
-3 -9 9 -0.6356 -0.0135
-3 -9 10 -1.2393 0.0062
-3 -9 11 -0.4767 0.0107
-3 -9 12 0.9967 -0.0061
-3 -8 1 0.4223 -0.1106
-3 -8 2 2.1129 -0.0833
-3 -8 3 1.3804 0.0058
-3 -8 4 -0.8906 0.0360
-3 -8 5 -1.5469 0.0088
-3 -8 6 -0.5616 0.0047
-3 -8 7 0.4317 0.0184
-3 -8 8 0.4846 0.0005
-3 -8 9 -0.8333 -0.0212
-3 -8 10 -2.1492 -0.0044
-3 -8 11 -1.3600 0.0149
-3 -8 12 0.1593 -0.0007
-3 -8 13 -0.3304 -0.0159
-3 -8 14 -1.3227 -0.0027
-3 -7 1 -0.0483 -0.0347
-3 -7 2 0.7539 -0.0509
-3 -7 3 -0.1160 0.0038
-3 -7 4 -1.3860 0.0426
-3 -7 5 -0.6841 0.0218
-3 -7 6 1.1627 0.0030
-3 -7 7 1.8248 0.0149
-3 -7 8 0.6692 0.0097
-3 -7 9 -1.0936 -0.0167
-3 -7 10 -1.5668 -0.0131
-3 -7 11 -0.2624 0.0132
-3 -7 12 0.6279 0.0098
-3 -7 13 -0.5073 -0.0128
-3 -7 14 -1.6162 -0.0090
-3 -7 15 -0.5739 0.0066
-3 -6 1 -2.2252 0.0678
-3 -6 2 -2.0855 0.0080
-3 -6 3 -1.8359 -0.0029
-3 -6 4 -1.0237 0.0253
-3 -6 5 0.5995 0.0190
-3 -6 6 1.4648 -0.0087
-3 -6 7 0.1898 -0.0032
-3 -6 8 -2.0791 0.0103
-3 -6 9 -2.7060 -0.0074
-3 -6 10 -0.7104 -0.0191
-3 -6 11 1.8306 0.0040
-3 -6 12 2.1580 0.0167
-3 -6 13 0.2224 -0.0017
-3 -6 14 -1.5183 -0.0062
-3 -6 15 -1.3388 0.0107
-3 -6 16 0.2182 0.0040
-3 -5 1 -6.5785 0.1387
-3 -5 2 -5.8926 0.0581
-3 -5 3 -2.6946 -0.0132
-3 -5 4 0.7485 -0.0053
-3 -5 5 2.2378 0.0060
-3 -5 6 0.8068 -0.0207
-3 -5 7 -2.5709 -0.0253
-3 -5 8 -5.0657 0.0019
-3 -5 9 -4.0293 0.0013
-3 -5 10 -0.1802 -0.0197
-3 -5 11 2.8181 -0.0079
-3 -5 12 2.9387 0.0145
-3 -5 13 1.4849 0.0040
-3 -5 14 0.0442 -0.0076
-3 -5 15 -0.7817 0.0080
-3 -5 16 -0.1578 0.0098
-3 -5 17 1.8218 -0.0149
-3 -4 1 -11.2470 0.1376
-3 -4 2 -8.3921 0.0754
-3 -4 3 -1.4871 -0.0178
-3 -4 4 3.2273 -0.0294
-3 -4 5 2.8393 -0.0045
-3 -4 6 -0.7938 -0.0183
-3 -4 7 -4.2438 -0.0317
-3 -4 8 -4.9956 -0.0050
-3 -4 9 -2.4154 0.0097
-3 -4 10 1.1553 -0.0102
-3 -4 11 2.4918 -0.0111
-3 -4 12 1.8306 0.0110
-3 -4 13 1.5445 0.0062
-3 -4 14 1.4871 -0.0125
-3 -4 15 0.6530 -0.0032
-3 -4 16 0.6372 0.0097
-3 -4 17 2.1806 -0.0014
-3 -4 18 2.5517 -0.0044
-3 -3 1 -11.9310 0.0624
-3 -3 2 -5.5873 0.0552
-3 -3 3 3.9800 -0.0119
-3 -3 4 6.9585 -0.0380
-3 -3 5 2.6010 -0.0108
-3 -3 6 -2.8693 -0.0029
-3 -3 7 -4.7703 -0.0168
-3 -3 8 -2.8445 -0.0047
-3 -3 9 0.8606 0.0137
-3 -3 10 3.1895 0.0022
-3 -3 11 2.2976 -0.0068
-3 -3 12 0.4080 0.0084
-3 -3 13 0.1804 0.0090
-3 -3 14 0.2120 -0.0117
-3 -3 15 -0.8772 -0.0130
-3 -3 16 -0.6799 0.0036
-3 -3 17 1.5022 0.0066
-3 -3 18 2.0043 0.0029
-3 -3 19 -0.2534 0.0070
-3 -2 1 -7.5226 -0.0452
-3 -2 2 3.4763 0.0133
-3 -2 3 14.2235 0.0029
-3 -2 4 13.1942 -0.0310
-3 -2 5 4.0604 -0.0169
-3 -2 6 -2.8878 0.0118
-3 -2 7 -3.6032 0.0080
-3 -2 8 -0.6131 0.0010
-3 -2 9 2.7287 0.0111
-3 -2 10 3.8765 0.0087
-3 -2 11 2.1957 -0.0047
-3 -2 12 0.2114 -0.0009
-3 -2 13 -0.5010 0.0062
-3 -2 14 -2.1513 -0.0054
-3 -2 15 -5.1672 -0.0142
-3 -2 16 -5.7038 -0.0044
-3 -2 17 -2.7828 0.0042
-3 -2 18 -0.5113 -0.0003
-3 -2 19 -0.6431 -0.0067
-3 -2 20 -0.6384 -0.0054
-3 -1 1 -3.4285 -0.1218
-3 -1 2 12.8147 -0.0265
-3 -1 3 23.8540 0.0209
-3 -1 4 18.6373 -0.0091
-3 -1 5 6.0700 -0.0174
-3 -1 6 -0.9455 0.0178
-3 -1 7 -0.6098 0.0272
-3 -1 8 1.9864 0.0077
-3 -1 9 3.5700 0.0069
-3 -1 10 3.0760 0.0129
-3 -1 11 0.9867 -0.0013
-3 -1 12 -0.2973 -0.0120
-3 -1 13 -0.4161 -0.0032
-3 -1 14 -2.4246 0.0008
-3 -1 15 -6.5407 -0.0074
-3 -1 16 -8.5538 -0.0079
-3 -1 17 -6.9060 -0.0010
-3 -1 18 -4.4028 -0.0044
-3 -1 19 -2.5183 -0.0142
-3 -1 20 -0.7068 -0.0107
-3 0 1 -4.9109 -0.1290
-3 0 2 15.4595 -0.0531
-3 0 3 25.8973 0.0280
-3 0 4 17.2925 0.0189
-3 0 5 3.2774 -0.0069
-3 0 6 -1.9504 0.0154
-3 0 7 0.7130 0.0298
-3 0 8 3.9998 0.0071
-3 0 9 4.7337 -0.0010
-3 0 10 2.6887 0.0137
-3 0 11 -0.8381 0.0079
-3 0 12 -2.6887 -0.0116
-3 0 13 -2.0848 -0.0083
-3 0 14 -2.0905 0.0057
-3 0 15 -3.8520 0.0031
-3 0 16 -5.0668 -0.0035
-3 0 17 -4.9091 0.0008
-3 0 18 -4.4277 0.0007
-3 0 19 -3.4981 -0.0095
-3 0 20 -2.1686 -0.0073
-3 0 21 -1.7213 0.0079
-3 1 1 -10.0525 -0.0785
-3 1 2 11.3914 -0.0688
-3 1 3 19.8594 0.0105
-3 1 4 8.8406 0.0338
-3 1 5 -4.9477 0.0070
-3 1 6 -7.3736 0.0063
-3 1 7 -1.7566 0.0161
-3 1 8 3.2880 -0.0032
-3 1 9 4.7957 -0.0170
-3 1 10 2.7192 0.0008
-3 1 11 -1.6838 0.0118
-3 1 12 -4.8315 -0.0012
-3 1 13 -4.8433 -0.0048
-3 1 14 -3.5233 0.0083
-3 1 15 -2.1714 0.0107
-3 1 16 -0.6373 0.0036
-3 1 17 0.1469 0.0068
-3 1 18 -0.3837 0.0105
-3 1 19 -1.1520 0.0003
-3 1 20 -2.1556 -0.0053
-3 1 21 -3.8624 0.0050
-3 2 1 -12.6133 -0.0082
-3 2 2 5.8715 -0.0671
-3 2 3 10.7597 -0.0205
-3 2 4 -1.3468 0.0263
-3 2 5 -12.8917 0.0123
-3 2 6 -11.8133 -0.0064
-3 2 7 -4.0008 -0.0017
-3 2 8 1.5024 -0.0096
-3 2 9 3.0822 -0.0274
-3 2 10 1.7579 -0.0184
-3 2 11 -1.4964 0.0055
-3 2 12 -4.1987 0.0089
-3 2 13 -4.8383 0.0013
-3 2 14 -4.1550 0.0060
-3 2 15 -2.5010 0.0113
-3 2 16 -0.2214 0.0067
-3 2 17 1.0953 0.0065
-3 2 18 1.1521 0.0107
-3 2 19 0.9210 0.0039
-3 2 20 -0.6164 -0.0059
-3 2 21 -4.1457 -0.0036
-3 2 22 -5.9403 0.0018
-3 3 1 -9.2687 0.0511
-3 3 2 3.1161 -0.0322
-3 3 3 3.3020 -0.0334
-3 3 4 -8.6434 0.0088
-3 3 5 -16.3827 0.0087
-3 3 6 -11.5437 -0.0166
-3 3 7 -2.5075 -0.0136
-3 3 8 1.8437 -0.0029
-3 3 9 1.7932 -0.0163
-3 3 10 0.2551 -0.0218
-3 3 11 -1.5046 0.0022
-3 3 12 -2.4389 0.0179
-3 3 13 -2.3401 0.0070
-3 3 14 -1.8989 0.0003
-3 3 15 -1.1714 0.0074
-3 3 16 -0.6562 0.0072
-3 3 17 -1.3166 0.0004
-3 3 18 -1.8522 -0.0008
-3 3 19 -0.6613 -0.0021
-3 3 20 -0.1148 -0.0056
-3 3 21 -2.9529 -0.0044
-3 3 22 -6.3851 -0.0042
-3 4 1 -2.3620 0.0848
-3 4 2 3.5010 0.0318
-3 4 3 -0.1333 -0.0149
-3 4 4 -10.6294 -0.0034
-3 4 5 -14.7757 0.0055
-3 4 6 -7.9623 -0.0172
-3 4 7 0.7798 -0.0191
-3 4 8 3.7024 0.0052
-3 4 9 2.0997 0.0053
-3 4 10 -0.3046 -0.0094
-3 4 11 -1.9562 0.0040
-3 4 12 -2.3111 0.0220
-3 4 13 -1.4539 0.0089
-3 4 14 0.0108 -0.0068
-3 4 15 1.2643 0.0012
-3 4 16 0.6301 0.0070
-3 4 17 -2.4804 -0.0039
-3 4 18 -4.8378 -0.0113
-3 4 19 -3.3400 -0.0088
-3 4 20 -0.5975 -0.0044
-3 4 21 -1.2479 -0.0001
-3 4 22 -4.6476 -0.0018
-3 5 1 3.0672 0.0904
-3 5 2 4.1736 0.0903
-3 5 3 -0.2995 0.0135
-3 5 4 -7.3202 -0.0112
-3 5 5 -8.6746 0.0062
-3 5 6 -2.6867 -0.0059
-3 5 7 3.6583 -0.0197
-3 5 8 5.0799 0.0028
-3 5 9 2.8885 0.0169
-3 5 10 0.1227 0.0012
-3 5 11 -1.9076 -0.0008
-3 5 12 -2.7665 0.0116
-3 5 13 -2.1608 0.0007
-3 5 14 -0.2090 -0.0170
-3 5 15 1.7421 -0.0094
-3 5 16 1.1614 0.0017
-3 5 17 -2.4388 -0.0051
-3 5 18 -5.2919 -0.0116
-3 5 19 -3.9256 -0.0075
-3 5 20 -0.4537 -0.0025
-3 5 21 0.4206 0.0002
-3 5 22 -1.9439 -0.0011
-3 6 1 4.4215 0.0683
-3 6 2 2.6348 0.1045
-3 6 3 -0.3776 0.0239
-3 6 4 -2.7976 -0.0200
-3 6 5 -1.8399 0.0062
-3 6 6 2.2468 0.0089
-3 6 7 5.6618 -0.0163
-3 6 8 5.6346 -0.0062
-3 6 9 3.0250 0.0179
-3 6 10 0.2419 0.0089
-3 6 11 -1.3710 -0.0066
-3 6 12 -1.8045 -0.0040
-3 6 13 -1.2634 -0.0088
-3 6 14 0.1117 -0.0220
-3 6 15 1.2521 -0.0180
-3 6 16 0.4710 -0.0060
-3 6 17 -2.0436 -0.0045
-3 6 18 -3.5877 -0.0044
-3 6 19 -2.2493 -0.0004
-3 6 20 0.4295 -0.0004
-3 6 21 1.4154 -0.0012
-3 6 22 0.0102 -0.0007
-3 7 1 3.1726 0.0159
-3 7 2 0.3917 0.0598
-3 7 3 -1.1332 0.0107
-3 7 4 -0.8315 -0.0254
-3 7 5 0.8208 0.0022
-3 7 6 3.2640 0.0154
-3 7 7 5.2212 -0.0120
-3 7 8 4.7978 -0.0141
-3 7 9 1.9061 0.0147
-3 7 10 -0.9387 0.0181
-3 7 11 -1.7249 -0.0015
-3 7 12 -1.0000 -0.0066
-3 7 13 -0.0247 -0.0040
-3 7 14 0.7069 -0.0094
-3 7 15 0.8057 -0.0110
-3 7 16 0.1954 -0.0045
-3 7 17 -0.2760 0.0010
-3 7 18 0.0283 0.0052
-3 7 19 0.7796 0.0054
-3 7 20 1.5322 -0.0004
-3 7 21 1.8509 -0.0008
-3 7 22 1.1851 0.0053
-3 8 1 1.2667 -0.0558
-3 8 2 0.1671 -0.0208
-3 8 3 -0.2399 -0.0107
-3 8 4 -0.1076 -0.0202
-3 8 5 -0.0514 -0.0042
-3 8 6 0.7604 0.0115
-3 8 7 2.4911 -0.0053
-3 8 8 2.6865 -0.0145
-3 8 9 0.1456 0.0078
-3 8 10 -2.4671 0.0195
-3 8 11 -2.8854 0.0042
-3 8 12 -2.1324 -0.0036
-3 8 13 -1.6246 0.0053
-3 8 14 -1.4585 0.0093
-3 8 15 -1.4345 0.0054
-3 8 16 -0.7981 0.0047
-3 8 17 1.1037 0.0084
-3 8 18 2.7379 0.0107
-3 8 19 2.3619 0.0051
-3 8 20 1.3704 -0.0050
-3 8 21 1.7068 -0.0041
-3 9 1 -1.2694 -0.1065
-3 9 2 0.7697 -0.0839
-3 9 3 1.7030 -0.0190
-3 9 4 1.0375 -0.0050
-3 9 5 -0.4616 -0.0102
-3 9 6 -0.5422 0.0041
-3 9 7 1.1894 0.0087
-3 9 8 1.6936 -0.0020
-3 9 9 -0.3775 0.0019
-3 9 10 -2.3937 0.0107
-3 9 11 -2.8722 0.0016
-3 9 12 -3.2107 -0.0076
-3 9 13 -3.8448 0.0009
-3 9 14 -4.0178 0.0103
-3 9 15 -3.6949 0.0086
-3 9 16 -2.3608 0.0057
-3 9 17 0.2115 0.0073
-3 9 18 1.4271 0.0069
-3 9 19 -0.4412 -0.0007
-3 9 20 -2.0948 -0.0110
-3 9 21 -0.4386 -0.0129
-3 10 1 -3.8416 -0.0957
-3 10 2 -0.3200 -0.0864
-3 10 3 1.2351 -0.0053
-3 10 4 0.7332 0.0129
-3 10 5 -0.0018 -0.0132
-3 10 6 0.9147 -0.0025
-3 10 7 2.6744 0.0225
-3 10 8 2.3981 0.0143
-3 10 9 0.1214 -0.0014
-3 10 10 -1.3475 0.0007
-3 10 11 -1.7176 0.0010
-3 10 12 -2.5075 -0.0064
-3 10 13 -3.0507 -0.0054
-3 10 14 -2.5535 -0.0001
-3 10 15 -2.0473 -0.0012
-3 10 16 -1.3772 -0.0026
-3 10 17 -0.0744 -0.0006
-3 10 18 -0.6779 -0.0010
-3 10 19 -4.2957 -0.0051
-3 10 20 -6.4527 -0.0111
-3 11 1 -3.8792 -0.0286
-3 11 2 -1.3216 -0.0363
-3 11 3 -0.7135 0.0158
-3 11 4 -0.9019 0.0234
-3 11 5 0.2273 -0.0120
-3 11 6 2.7242 -0.0097
-3 11 7 4.0530 0.0203
-3 11 8 2.2791 0.0159
-3 11 9 -0.5348 -0.0090
-3 11 10 -1.5033 -0.0096
-3 11 11 -1.3870 0.0032
-3 11 12 -1.5509 0.0045
-3 11 13 -0.9322 0.0004
-3 11 14 0.3251 -0.0017
-3 11 15 0.4660 -0.0041
-3 11 16 0.4560 -0.0037
-3 11 17 1.5123 -0.0020
-3 11 18 0.7582 -0.0042
-3 11 19 -3.2659 -0.0053
-3 12 1 -0.3626 0.0493
-3 12 2 1.2326 0.0210
-3 12 3 0.7539 0.0236
-3 12 4 0.2524 0.0228
-3 12 5 1.5453 -0.0059
-3 12 6 3.4004 -0.0179
-3 12 7 3.1116 0.0005
-3 12 8 0.4245 0.0038
-3 12 9 -1.6447 -0.0141
-3 12 10 -1.4762 -0.0160
-3 12 11 -0.9219 -0.0003
-3 12 12 -0.8851 0.0065
-3 12 13 -0.3312 0.0025
-3 12 14 -0.2538 -0.0010
-3 12 15 -1.6751 -0.0005
-3 12 16 -1.6680 0.0027
-3 12 17 1.3130 0.0018
-3 12 18 3.0165 -0.0061
-3 13 1 3.4495 0.0924
-3 13 2 5.8534 0.0487
-3 13 3 6.0686 0.0132
-3 13 4 5.2492 0.0160
-3 13 5 4.1171 0.0046
-3 13 6 2.0906 -0.0220
-3 13 7 -0.7524 -0.0208
-3 13 8 -2.4037 -0.0029
-3 13 9 -1.1382 -0.0008
-3 13 10 1.2650 -0.0047
-3 13 11 1.7159 -0.0010
-3 13 12 0.5040 -0.0003
-3 13 13 -0.7486 -0.0056
-3 13 14 -2.9424 -0.0065
-3 13 15 -5.6772 -0.0015
-3 13 16 -4.9393 0.0025
-3 14 1 3.5898 0.0811
-3 14 2 7.3306 0.0398
-3 14 3 9.8485 -0.0072
-3 14 4 9.6587 0.0042
-3 14 5 5.2891 0.0120
-3 14 6 -1.9467 -0.0174
-3 14 7 -7.2571 -0.0263
-3 14 8 -6.4134 0.0023
-3 14 9 -0.6695 0.0198
-3 14 10 3.8783 0.0126
-3 14 11 3.4358 0.0040
-3 14 12 0.3610 -0.0006
-3 14 13 -2.2857 -0.0040
-3 14 14 -4.6344 -0.0014
-3 15 3 8.6744 -0.0252
-3 15 4 10.0374 -0.0152
-3 15 5 4.2135 0.0065
-3 15 6 -6.1209 -0.0063
-3 15 7 -12.5224 -0.0131
-3 15 8 -9.7710 0.0097
-3 15 9 -1.9491 0.0207
-2 -14 1 8.1367 0.0280
-2 -14 2 6.6956 0.0310
-2 -13 1 4.4350 0.0093
-2 -13 2 6.6209 0.0543
-2 -13 3 7.0636 0.0199
-2 -13 4 3.4886 -0.0205
-2 -13 5 -2.1427 -0.0034
-2 -12 1 -1.6029 -0.0222
-2 -12 2 2.9124 0.0457
-2 -12 3 5.4561 0.0308
-2 -12 4 3.1067 -0.0180
-2 -12 5 -0.6885 -0.0126
-2 -12 6 -1.9293 0.0163
-2 -12 7 -1.0585 0.0081
-2 -11 1 -4.4135 -0.0436
-2 -11 2 0.0551 0.0141
-2 -11 3 2.6969 0.0286
-2 -11 4 0.9344 -0.0059
-2 -11 5 -1.0161 -0.0169
-2 -11 6 -0.3402 0.0055
-2 -11 7 0.8312 0.0088
-2 -11 8 1.2390 -0.0054
-2 -11 9 1.8035 0.0006
-2 -11 10 2.3091 0.0081
-2 -10 1 -3.3130 -0.0484
-2 -10 2 -0.1109 -0.0302
-2 -10 3 1.4506 0.0145
-2 -10 4 -0.6307 0.0159
-2 -10 5 -2.0078 -0.0061
-2 -10 6 -0.5873 -0.0009
-2 -10 7 0.7948 0.0112
-2 -10 8 1.0697 0.0013
-2 -10 9 1.5158 -0.0047
-2 -10 10 1.8147 0.0072
-2 -10 11 1.5458 0.0061
-2 -9 1 -0.6428 -0.0397
-2 -9 2 1.4613 -0.0721
-2 -9 3 1.9648 -0.0122
-2 -9 4 -0.7939 0.0294
-2 -9 5 -2.5652 0.0093
-2 -9 6 -1.1874 -0.0037
-2 -9 7 0.5381 0.0112
-2 -9 8 0.9531 0.0066
-2 -9 9 0.7326 -0.0134
-2 -9 10 -0.0018 -0.0051
-2 -9 11 -0.6792 0.0156
-2 -9 12 -0.3505 0.0079
-2 -9 13 -0.0917 -0.0094
-2 -8 1 1.9615 -0.0149
-2 -8 2 3.5428 -0.0804
-2 -8 3 3.2289 -0.0337
-2 -8 4 -0.1233 0.0264
-2 -8 5 -2.1961 0.0170
-2 -8 6 -0.6076 -0.0066
-2 -8 7 1.7659 0.0062
-2 -8 8 2.1301 0.0098
-2 -8 9 0.5331 -0.0182
-2 -8 10 -1.6372 -0.0243
-2 -8 11 -2.5042 0.0042
-2 -8 12 -1.5222 0.0110
-2 -8 13 -0.6628 -0.0133
-2 -8 14 -0.9977 -0.0176
-2 -7 1 3.1219 0.0239
-2 -7 2 4.1227 -0.0369
-2 -7 3 3.1110 -0.0294
-2 -7 4 -0.0616 0.0149
-2 -7 5 -1.3576 0.0170
-2 -7 6 0.9712 -0.0087
-2 -7 7 3.6908 -0.0034
-2 -7 8 3.4393 0.0122
-2 -7 9 0.5016 -0.0069
-2 -7 10 -2.2520 -0.0273
-2 -7 11 -2.4868 -0.0089
-2 -7 12 -0.8939 0.0082
-2 -7 13 -0.0098 -0.0105
-2 -7 14 -0.3591 -0.0224
-2 -7 15 -0.3724 -0.0007
-2 -7 16 0.0375 0.0105
-2 -6 1 1.1381 0.0609
-2 -6 2 0.8434 0.0345
-2 -6 3 -0.2517 -0.0058
-2 -6 4 -1.5935 0.0010
-2 -6 5 -0.9051 0.0133
-2 -6 6 1.8324 -0.0083
-2 -6 7 3.6234 -0.0182
-2 -6 8 2.2142 0.0059
-2 -6 9 -0.9925 0.0116
-2 -6 10 -2.5073 -0.0116
-2 -6 11 -1.0660 -0.0118
-2 -6 12 0.9496 0.0091
-2 -6 13 1.2266 0.0038
-2 -6 14 0.4716 -0.0118
-2 -6 15 0.1556 0.0024
-2 -6 16 0.0325 0.0170
-2 -6 17 -0.4140 -0.0017
-2 -5 1 -3.8880 0.0805
-2 -5 2 -6.0287 0.0887
-2 -5 3 -5.6469 0.0135
-2 -5 4 -3.3390 -0.0141
-2 -5 5 -0.3886 0.0092
-2 -5 6 1.5476 -0.0021
-2 -5 7 1.2132 -0.0301
-2 -5 8 -1.2633 -0.0102
-2 -5 9 -3.6176 0.0194
-2 -5 10 -3.0762 0.0039
-2 -5 11 -0.0625 -0.0134
-2 -5 12 2.1052 0.0050
-2 -5 13 2.0786 0.0151
-2 -5 14 1.4560 0.0003
-2 -5 15 0.9661 0.0018
-2 -5 16 0.0559 0.0144
-2 -5 17 -0.5596 0.0008
-2 -5 18 0.0026 -0.0175
-2 -4 1 -8.7414 0.0722
-2 -4 2 -12.5741 0.0959
-2 -4 3 -9.0256 0.0162
-2 -4 4 -2.6483 -0.0259
-2 -4 5 1.1796 0.0057
-2 -4 6 1.0065 0.0114
-2 -4 7 -1.2323 -0.0240
-2 -4 8 -3.5326 -0.0191
-2 -4 9 -4.4232 0.0174
-2 -4 10 -2.8470 0.0116
-2 -4 11 -0.0611 -0.0157
-2 -4 12 1.4275 -0.0055
-2 -4 13 1.7346 0.0140
-2 -4 14 2.3756 0.0034
-2 -4 15 2.4890 -0.0059
-2 -4 16 1.0065 0.0036
-2 -4 17 -0.2596 0.0016
-2 -4 18 0.1159 -0.0100
-2 -4 19 0.6191 -0.0060
-2 -3 1 -9.5629 0.0214
-2 -3 2 -13.8402 0.0507
-2 -3 3 -6.2913 0.0052
-2 -3 4 2.4075 -0.0305
-2 -3 5 4.1547 -0.0033
-2 -3 6 0.5082 0.0197
-2 -3 7 -2.8436 -0.0023
-2 -3 8 -3.6941 -0.0107
-2 -3 9 -2.9389 0.0146
-2 -3 10 -1.3925 0.0160
-2 -3 11 -0.1411 -0.0100
-2 -3 12 -0.0108 -0.0101
-2 -3 13 0.3344 0.0085
-2 -3 14 1.8668 0.0034
-2 -3 15 2.6017 -0.0103
-2 -3 16 1.3594 -0.0046
-2 -3 17 0.2852 0.0040
-2 -3 19 0.7679 -0.0024
-2 -3 20 0.1907 -0.0022
-2 -2 1 -6.0806 -0.0711
-2 -2 2 -8.1091 -0.0285
-2 -2 3 3.8100 -0.0103
-2 -2 4 12.4300 -0.0255
-2 -2 5 9.2964 -0.0201
-2 -2 6 0.9634 0.0087
-2 -2 7 -3.7228 0.0142
-2 -2 8 -3.7090 0.0027
-2 -2 9 -2.1994 0.0084
-2 -2 10 -0.9356 0.0150
-2 -2 11 -0.5077 0.0015
-2 -2 12 -0.9007 -0.0063
-2 -2 13 -0.8539 0.0039
-2 -2 14 -0.1139 0.0058
-2 -2 15 -0.3572 -0.0048
-2 -2 16 -1.6053 -0.0051
-2 -2 17 -1.6122 0.0058
-2 -2 18 -0.0240 0.0093
-2 -2 19 1.1815 -0.0001
-2 -2 20 1.2868 -0.0082
-2 -1 1 -3.1729 -0.1518
-2 -1 2 0.3101 -0.0981
-2 -1 3 17.0689 -0.0184
-2 -1 4 24.4875 -0.0064
-2 -1 5 15.8977 -0.0280
-2 -1 6 3.2651 -0.0111
-2 -1 7 -2.7948 0.0165
-2 -1 8 -3.1692 0.0098
-2 -1 9 -2.4522 -0.0020
-2 -1 10 -2.0775 0.0065
-2 -1 11 -1.9065 0.0086
-2 -1 12 -1.7669 -0.0033
-2 -1 13 -1.3623 -0.0040
-2 -1 14 -1.5276 0.0059
-2 -1 15 -3.3634 0.0050
-2 -1 16 -5.4885 -0.0024
-2 -1 17 -5.4743 0.0013
-2 -1 18 -3.2950 0.0087
-2 -1 19 -0.6315 0.0016
-2 -1 20 1.2452 -0.0098
-2 -1 21 1.4222 -0.0023
-2 0 1 -7.0730 -0.1388
-2 0 2 3.6959 -0.1103
-2 0 3 25.0775 -0.0132
-2 0 4 31.2419 0.0239
-2 0 5 18.6753 -0.0098
-2 0 6 4.1638 -0.0157
-2 0 7 -1.2463 0.0139
-2 0 8 -0.9775 0.0132
-2 0 9 -0.8683 -0.0078
-2 0 10 -1.8843 -0.0019
-2 0 11 -2.9661 0.0103
-2 0 12 -3.1459 -0.0023
-2 0 13 -2.2347 -0.0127
-2 0 14 -1.8466 0.0014
-2 0 15 -3.2728 0.0117
-2 0 16 -5.2149 0.0012
-2 0 17 -6.0383 -0.0049
-2 0 18 -5.5828 0.0032
-2 0 19 -3.7999 0.0029
-2 0 20 -1.3014 -0.0057
-2 0 21 -0.3653 -0.0008
-2 0 22 -1.6178 0.0024
-2 1 1 -18.0172 -0.0135
-2 1 2 -1.2553 -0.0566
-2 1 3 22.6231 -0.0036
-2 1 4 27.2177 0.0445
-2 1 5 12.6362 0.0215
-2 1 6 -0.8780 -0.0036
-2 1 7 -2.9140 0.0100
-2 1 8 0.3994 0.0131
-2 1 9 1.8428 -0.0072
-2 1 10 0.4571 -0.0081
-2 1 11 -2.0911 0.0068
-2 1 12 -3.7339 0.0009
-2 1 13 -3.4149 -0.0125
-2 1 14 -2.4605 -0.0025
-2 1 15 -2.1063 0.0119
-2 1 16 -1.9292 0.0045
-2 1 17 -2.2311 -0.0045
-2 1 18 -3.5498 0.0032
-2 1 19 -4.2182 0.0067
-2 1 20 -3.2366 -0.0021
-2 1 21 -2.7783 -0.0006
-2 1 22 -3.6129 0.0067
-2 2 1 -27.1750 0.1339
-2 2 2 -8.6164 0.0196
-2 2 3 13.5544 -0.0024
-2 2 4 15.5087 0.0343
-2 2 5 0.6857 0.0334
-2 2 6 -9.7157 0.0030
-2 2 7 -7.3583 -0.0022
-2 2 8 -0.7000 0.0055
-2 2 9 2.5450 -0.0059
-2 2 10 1.9371 -0.0161
-2 2 11 -0.4826 -0.0051
-2 2 12 -2.5223 0.0035
-2 2 13 -3.0461 -0.0029
-2 2 14 -2.8501 -0.0031
-2 2 15 -2.1869 0.0059
-2 2 16 -0.5258 0.0049
-2 2 17 0.5236 0.0001
-2 2 18 -0.6591 0.0074
-2 2 19 -2.1363 0.0119
-2 2 20 -2.2234 0.0012
-2 2 21 -2.8211 -0.0044
-2 2 22 -4.5272 0.0039
-2 3 1 -24.9616 0.1801
-2 3 2 -9.2699 0.0650
-2 3 3 6.7056 -0.0066
-2 3 4 4.8422 0.0000
-2 3 5 -8.8387 0.0139
-2 3 6 -15.1963 -0.0069
-2 3 7 -9.3843 -0.0203
-2 3 8 -1.3797 -0.0054
-2 3 9 1.8966 -0.0014
-2 3 10 1.4285 -0.0179
-2 3 11 -0.1067 -0.0169
-2 3 12 -1.0496 0.0036
-2 3 13 -1.2134 0.0084
-2 3 14 -1.5750 -0.0017
-2 3 15 -1.7606 -0.0016
-2 3 16 -0.7570 0.0039
-2 3 17 -0.0301 0.0035
-2 3 18 -0.9772 0.0059
-2 3 19 -1.5750 0.0104
-2 3 20 -0.5597 0.0048
-2 3 21 -0.6060 -0.0030
-2 3 22 -3.1425 -0.0016
-2 4 1 -12.7628 0.0884
-2 4 2 -2.0858 0.0630
-2 4 3 6.0932 -0.0018
-2 4 4 0.8373 -0.0296
-2 4 5 -10.7652 -0.0153
-2 4 6 -13.8733 -0.0170
-2 4 7 -6.8987 -0.0290
-2 4 8 0.3855 -0.0111
-2 4 9 2.3847 0.0089
-2 4 10 0.9203 -0.0045
-2 4 11 -0.8983 -0.0145
-2 4 12 -1.4423 0.0052
-2 4 13 -0.8325 0.0153
-2 4 14 -0.3019 -0.0003
-2 4 15 -0.1033 -0.0056
-2 4 16 0.0214 0.0056
-2 4 17 -0.9321 0.0063
-2 4 18 -2.8863 -0.0007
-2 4 19 -3.0752 0.0007
-2 4 20 -0.5417 0.0038
-2 4 21 1.3140 0.0018
-2 4 22 -0.3445 -0.0007
-2 4 23 -3.7563 -0.0044
-2 5 1 -1.0516 -0.0590
-2 5 2 4.9801 0.0364
-2 5 3 7.6118 0.0159
-2 5 4 1.9860 -0.0353
-2 5 5 -6.2919 -0.0266
-2 5 6 -7.8804 -0.0073
-2 5 7 -2.5334 -0.0176
-2 5 8 2.6674 -0.0118
-2 5 9 3.5227 0.0143
-2 5 10 1.1506 0.0130
-2 5 11 -1.7290 -0.0026
-2 5 12 -3.0897 0.0057
-2 5 13 -2.4778 0.0138
-2 5 14 -0.9200 -0.0011
-2 5 15 0.3643 -0.0070
-2 5 16 0.3651 0.0063
-2 5 17 -1.5137 0.0074
-2 5 18 -3.9265 -0.0054
-2 5 19 -4.0905 -0.0079
-2 5 20 -1.3708 -0.0022
-2 5 21 1.5197 -0.0005
-2 5 22 1.6922 -0.0010
-2 5 23 -0.8640 -0.0025
-2 6 1 3.8397 -0.1446
-2 6 2 5.9008 0.0136
-2 6 3 6.0885 0.0321
-2 6 4 3.3233 -0.0219
-2 6 5 -0.3437 -0.0149
-2 6 6 -1.2509 0.0198
-2 6 7 1.1247 0.0072
-2 6 8 3.7380 -0.0115
-2 6 9 3.7178 0.0063
-2 6 10 1.0385 0.0182
-2 6 11 -2.0355 0.0046
-2 6 12 -3.3920 0.0000
-2 6 13 -2.7508 0.0047
-2 6 14 -1.2662 -0.0033
-2 6 15 -0.4262 -0.0086
-2 6 16 -1.1668 -0.0000
-2 6 17 -2.9092 0.0014
-2 6 18 -3.9097 -0.0071
-2 6 19 -3.2574 -0.0087
-2 6 20 -1.4994 -0.0065
-2 6 21 0.5061 -0.0072
-2 6 22 1.7384 -0.0039
-2 6 23 1.1620 0.0026
-2 7 1 4.0445 -0.1230
-2 7 2 3.1223 -0.0020
-2 7 3 2.2604 0.0287
-2 7 4 2.4213 -0.0055
-2 7 5 2.5902 0.0027
-2 7 6 2.2992 0.0387
-2 7 7 2.7021 0.0252
-2 7 8 3.6793 -0.0113
-2 7 9 2.9750 -0.0074
-2 7 10 0.1576 0.0121
-2 7 11 -2.0643 0.0057
-2 7 12 -1.9203 -0.0056
-2 7 13 -0.5671 -0.0018
-2 7 14 0.1996 -0.0001
-2 7 15 -0.5550 -0.0056
-2 7 16 -2.4696 -0.0080
-2 7 17 -3.4521 -0.0082
-2 7 18 -2.1121 -0.0077
-2 7 19 -0.3125 -0.0051
-2 7 20 -0.0729 -0.0065
-2 7 21 -0.1405 -0.0081
-2 7 22 0.8778 0.0009
-2 8 1 2.6114 -0.0400
-2 8 2 1.3362 -0.0218
-2 8 3 0.0983 0.0047
-2 8 4 0.7391 0.0044
-2 8 5 1.7474 0.0076
-2 8 6 1.5544 0.0271
-2 8 7 1.7818 0.0208
-2 8 8 2.9023 -0.0098
-2 8 9 2.1216 -0.0147
-2 8 10 -0.8375 0.0041
-2 8 11 -2.3644 0.0056
-2 8 12 -1.1919 -0.0052
-2 8 13 0.2540 -0.0010
-2 8 14 0.2563 0.0084
-2 8 15 -1.1378 0.0036
-2 8 16 -2.8457 -0.0080
-2 8 17 -2.4465 -0.0112
-2 8 18 0.7074 -0.0057
-2 8 19 3.0134 -0.0018
-2 8 20 1.9761 -0.0051
-2 8 21 0.4026 -0.0039
-2 8 22 0.9199 0.0103
-2 9 1 0.0435 0.0359
-2 9 2 0.9876 -0.0407
-2 9 3 0.4039 -0.0185
-2 9 4 -0.0814 0.0114
-2 9 5 -0.4223 -0.0008
-2 9 6 -0.8918 -0.0082
-2 9 7 0.2963 0.0008
-2 9 8 2.5814 -0.0039
-2 9 9 2.1926 -0.0113
-2 9 10 -0.8852 -0.0018
-2 9 11 -2.6606 0.0045
-2 9 12 -2.3432 -0.0023
-2 9 13 -2.2237 -0.0010
-2 9 14 -2.6891 0.0090
-2 9 15 -3.1130 0.0072
-2 9 16 -3.3703 -0.0041
-2 9 17 -2.1159 -0.0069
-2 9 18 0.9761 -0.0012
-2 9 19 2.6819 0.0005
-2 9 20 1.3830 -0.0024
-2 9 21 0.2881 0.0008
-2 10 1 -2.4663 0.0703
-2 10 2 0.4396 -0.0384
-2 10 3 0.8469 -0.0195
-2 10 4 -0.4338 0.0201
-2 10 5 -1.6862 -0.0086
-2 10 6 -1.7365 -0.0369
-2 10 7 0.6347 -0.0140
-2 10 8 3.5575 0.0063
-2 10 9 3.1668 -0.0027
-2 10 10 0.0156 -0.0053
-2 10 11 -2.2731 0.0044
-2 10 12 -3.3693 0.0033
-2 10 13 -4.4727 -0.0028
-2 10 14 -4.5540 -0.0014
-2 10 15 -3.4085 -0.0014
-2 10 16 -2.6416 -0.0049
-2 10 17 -2.0297 -0.0027
-2 10 18 -0.9257 0.0017
-2 10 19 -0.9740 0.0021
-2 10 20 -2.2586 0.0036
-2 10 21 -1.9075 0.0079
-2 11 1 -2.8802 0.0622
-2 11 2 -0.1886 -0.0122
-2 11 3 0.4269 -0.0042
-2 11 4 -0.7731 0.0224
-2 11 5 -1.4556 -0.0085
-2 11 6 -0.3956 -0.0397
-2 11 7 2.2494 -0.0155
-2 11 8 4.0541 0.0112
-2 11 9 2.6643 -0.0001
-2 11 10 -0.2655 -0.0091
-2 11 11 -1.9932 0.0054
-2 11 12 -2.9197 0.0122
-2 11 13 -3.6267 0.0011
-2 11 14 -2.8966 -0.0085
-2 11 15 -1.2492 -0.0100
-2 11 16 -0.4926 -0.0063
-2 11 17 -0.2699 -0.0002
-2 11 18 -0.2334 0.0009
-2 11 19 -1.7202 0.0000
-2 11 20 -3.7148 0.0081
-2 12 1 -0.7203 0.0308
-2 12 2 0.7789 0.0179
-2 12 3 0.9822 0.0059
-2 12 4 0.1241 0.0103
-2 12 5 0.2266 -0.0036
-2 12 6 1.5411 -0.0237
-2 12 7 2.6912 -0.0144
-2 12 8 1.9439 0.0018
-2 12 9 -0.6562 -0.0054
-2 12 10 -2.6512 -0.0114
-2 12 11 -2.6836 0.0033
-2 12 12 -2.0600 0.0132
-2 12 13 -1.6245 0.0032
-2 12 14 -1.1722 -0.0089
-2 12 15 -1.1649 -0.0099
-2 12 16 -0.9925 -0.0026
-2 12 17 0.9937 0.0026
-2 12 18 3.1300 -0.0032
-2 12 19 2.0909 -0.0082
-2 13 1 2.6084 0.0033
-2 13 2 4.0715 0.0354
-2 13 3 4.4169 0.0053
-2 13 4 3.7543 -0.0052
-2 13 5 3.1963 0.0057
-2 13 6 2.3406 -0.0027
-2 13 7 0.3788 -0.0169
-2 13 8 -2.3132 -0.0129
-2 13 9 -4.1393 -0.0041
-2 13 10 -3.9640 -0.0012
-2 13 11 -2.6539 0.0024
-2 13 12 -1.6317 0.0026
-2 13 13 -1.3413 -0.0053
-2 13 14 -2.4463 -0.0112
-2 13 15 -4.7384 -0.0074
-2 13 16 -4.5714 0.0008
-2 13 17 0.3940 0.0021
-2 14 1 4.3102 -0.0084
-2 14 2 7.0687 0.0351
-2 14 3 8.9202 0.0016
-2 14 4 9.0968 -0.0112
-2 14 5 6.7912 0.0167
-2 14 6 1.5827 0.0152
-2 14 7 -4.3364 -0.0148
-2 14 8 -7.1084 -0.0144
-2 14 9 -5.2604 0.0126
-2 14 10 -1.7724 0.0215
-2 14 11 -0.5645 0.0078
-2 14 12 -1.7214 -0.0064
-2 14 13 -3.2691 -0.0117
-2 14 14 -5.4632 -0.0086
-2 14 15 -7.7385 -0.0018
-2 15 2 5.7322 0.0174
-2 15 3 9.5904 -0.0027
-2 15 4 12.1544 -0.0145
-2 15 5 9.4669 0.0122
-2 15 6 0.5872 0.0182
-2 15 7 -8.6656 -0.0052
-2 15 8 -10.6887 -0.0002
-2 15 9 -4.8790 0.0303
-2 15 10 1.1971 0.0333
-2 15 11 1.1200 0.0072
-1 -14 1 4.2056 0.0260
-1 -14 2 4.0964 0.0374
-1 -13 1 3.0166 -0.0375
-1 -13 2 4.6044 0.0152
-1 -13 3 6.8363 0.0314
-1 -13 4 6.2676 -0.0116
-1 -13 5 0.8538 -0.0274
-1 -13 6 -4.4503 0.0048
-1 -12 1 -1.5762 -0.1003
-1 -12 2 1.7900 -0.0196
-1 -12 3 5.9470 0.0277
-1 -12 4 5.8238 -0.0044
-1 -12 5 1.1367 -0.0294
-1 -12 6 -2.0302 0.0005
-1 -12 7 -0.8780 0.0202
-1 -12 8 0.9801 0.0003
-1 -11 1 -4.8422 -0.1091
-1 -11 2 -1.3401 -0.0422
-1 -11 3 3.3538 0.0144
-1 -11 4 3.8220 0.0080
-1 -11 5 0.9165 -0.0182
-1 -11 6 0.4158 -0.0061
-1 -11 7 2.7507 0.0125
-1 -11 8 3.6358 -0.0018
-1 -11 9 2.3447 -0.0123
-1 -11 10 1.2140 0.0058
-1 -10 1 -4.2058 -0.0441
-1 -10 2 -1.9302 -0.0392
-1 -10 3 1.6092 -0.0012
-1 -10 4 1.7114 0.0236
-1 -10 5 -0.2180 0.0065
-1 -10 6 0.7747 -0.0061
-1 -10 7 3.6859 0.0048
-1 -10 8 4.2160 0.0029
-1 -10 9 2.7366 -0.0113
-1 -10 10 1.8148 -0.0039
-1 -10 11 1.3212 0.0106
-1 -10 12 0.5934 -0.0007
-1 -9 1 -1.6948 0.0587
-1 -9 2 -0.3607 -0.0197
-1 -9 3 1.8408 -0.0203
-1 -9 4 0.8689 0.0266
-1 -9 5 -1.6152 0.0265
-1 -9 6 -0.8899 -0.0033
-1 -9 7 2.0690 -0.0015
-1 -9 8 3.1097 0.0104
-1 -9 9 2.0807 -0.0030
-1 -9 10 0.9426 -0.0090
-1 -9 11 -0.0493 0.0141
-1 -9 12 -0.7824 0.0230
-1 -9 13 -0.7521 -0.0023
-1 -9 14 -0.5017 -0.0184
-1 -8 1 0.6281 0.1352
-1 -8 2 2.0648 0.0074
-1 -8 3 3.5709 -0.0333
-1 -8 4 1.4153 0.0091
-1 -8 5 -2.2966 0.0228
-1 -8 6 -2.4762 -0.0073
-1 -8 7 0.5546 -0.0101
-1 -8 8 2.4958 0.0116
-1 -8 9 1.7484 0.0026
-1 -8 10 -0.2879 -0.0180
-1 -8 11 -2.0335 0.0005
-1 -8 12 -2.4485 0.0275
-1 -8 13 -1.6889 0.0101
-1 -8 14 -0.9714 -0.0205
-1 -8 15 -0.5933 -0.0144
-1 -7 1 2.7820 0.1313
-1 -7 2 4.4254 0.0355
-1 -7 3 5.1505 -0.0227
-1 -7 4 2.0662 -0.0134
-1 -7 5 -1.9951 0.0016
-1 -7 6 -2.1248 -0.0145
-1 -7 7 1.3101 -0.0184
-1 -7 8 3.7089 0.0068
-1 -7 9 2.5063 0.0101
-1 -7 10 -0.7064 -0.0171
-1 -7 11 -2.8324 -0.0181
-1 -7 12 -2.5752 0.0097
-1 -7 13 -1.2716 0.0079
-1 -7 14 -0.4942 -0.0197
-1 -7 15 -0.1366 -0.0166
-1 -7 16 0.1691 0.0074
-1 -6 1 3.6176 0.0411
-1 -6 2 4.2650 0.0488
-1 -6 3 3.5315 0.0057
-1 -6 4 0.4562 -0.0250
-1 -6 5 -1.9897 -0.0155
-1 -6 6 -0.7160 -0.0120
-1 -6 7 2.9918 -0.0208
-1 -6 8 4.9870 -0.0036
-1 -6 9 3.1063 0.0197
-1 -6 10 -0.4873 0.0053
-1 -6 11 -2.1024 -0.0163
-1 -6 12 -1.1318 -0.0051
-1 -6 13 0.0892 0.0046
-1 -6 14 0.4459 -0.0117
-1 -6 15 0.6931 -0.0128
-1 -6 16 0.6747 0.0110
-1 -6 17 -0.2870 0.0134
-1 -5 1 1.5271 -0.0720
-1 -5 2 -0.7802 0.0370
-1 -5 3 -3.0091 0.0245
-1 -5 4 -4.1711 -0.0276
-1 -5 5 -3.1428 -0.0162
-1 -5 6 -0.1463 0.0077
-1 -5 7 2.9378 -0.0123
-1 -5 8 3.8782 -0.0182
-1 -5 9 1.8852 0.0181
-1 -5 10 -0.8558 0.0291
-1 -5 11 -1.3261 -0.0006
-1 -5 12 0.0886 -0.0092
-1 -5 13 0.8498 0.0065
-1 -5 14 0.8327 0.0030
-1 -5 15 1.2007 -0.0052
-1 -5 16 1.0143 0.0081
-1 -5 17 -0.5124 0.0142
-1 -5 18 -1.5263 -0.0005
-1 -4 1 -0.6262 -0.1189
-1 -4 2 -8.1273 0.0160
-1 -4 3 -11.0821 0.0214
-1 -4 4 -8.4964 -0.0265
-1 -4 5 -3.6535 -0.0042
-1 -4 6 -0.1040 0.0369
-1 -4 7 1.3177 0.0100
-1 -4 8 1.2525 -0.0239
-1 -4 9 -0.1308 0.0045
-1 -4 10 -1.6909 0.0315
-1 -4 11 -1.5471 0.0055
-1 -4 12 -0.2827 -0.0145
-1 -4 13 0.2896 0.0036
-1 -4 14 0.7345 0.0124
-1 -4 15 1.7783 -0.0002
-1 -4 16 1.5697 -0.0012
-1 -4 17 -0.5621 0.0049
-1 -4 18 -1.9366 0.0005
-1 -4 19 -1.1100 -0.0019
-1 -3 1 2.2022 -0.0802
-1 -3 2 -11.6876 0.0041
-1 -3 3 -14.2207 0.0106
-1 -3 4 -7.4307 -0.0189
-1 -3 5 -0.6281 0.0056
-1 -3 6 1.0448 0.0508
-1 -3 7 -0.1365 0.0337
-1 -3 8 -0.8062 -0.0107
-1 -3 9 -1.1707 -0.0055
-1 -3 10 -1.9172 0.0180
-1 -3 11 -2.0402 0.0019
-1 -3 12 -1.4247 -0.0193
-1 -3 13 -0.7646 -0.0050
-1 -3 14 0.5688 0.0107
-1 -3 15 2.4190 0.0017
-1 -3 16 2.4524 -0.0069
-1 -3 17 0.2076 -0.0035
-1 -3 18 -1.4815 -0.0007
-1 -3 19 -1.0630 -0.0012
-1 -3 20 -0.0757 -0.0044
-1 -2 1 9.4422 -0.0348
-1 -2 2 -9.1813 -0.0111
-1 -2 3 -9.3995 0.0038
-1 -2 4 1.1221 -0.0022
-1 -2 5 7.0444 0.0026
-1 -2 6 4.0742 0.0281
-1 -2 7 -0.9454 0.0324
-1 -2 8 -2.6229 0.0052
-1 -2 9 -2.3532 -0.0084
-1 -2 10 -2.4989 0.0024
-1 -2 11 -2.6410 0.0020
-1 -2 12 -2.1487 -0.0107
-1 -2 13 -1.2197 -0.0076
-1 -2 14 0.2848 0.0050
-1 -2 15 1.8047 0.0052
-1 -2 16 1.8048 -0.0018
-1 -2 17 0.3678 -0.0019
-1 -2 18 -0.5269 0.0034
-1 -2 19 0.0513 0.0024
-1 -2 20 1.0703 -0.0082
-1 -2 21 1.3212 -0.0104
-1 -1 1 14.4985 -0.0521
-1 -1 2 -4.4967 -0.0489
-1 -1 3 0.3255 -0.0053
-1 -1 4 14.4135 0.0174
-1 -1 5 17.6960 -0.0058
-1 -1 6 8.7001 -0.0174
-1 -1 7 -0.8291 0.0017
-1 -1 8 -4.3246 0.0047
-1 -1 9 -4.4278 -0.0135
-1 -1 10 -4.3889 -0.0125
-1 -1 11 -4.0903 0.0051
-1 -1 12 -2.9027 0.0066
-1 -1 13 -1.2782 -0.0028
-1 -1 14 -0.0639 0.0008
-1 -1 15 0.0085 0.0107
-1 -1 16 -0.9382 0.0085
-1 -1 17 -1.7383 0.0018
-1 -1 18 -1.4356 0.0061
-1 -1 19 0.0014 0.0101
-1 -1 20 1.8590 -0.0020
-1 -1 21 2.6218 -0.0100
-1 -1 22 1.2110 0.0048
-1 0 2 -3.6373 -0.0817
-1 0 3 8.5182 -0.0203
-1 0 4 26.1937 0.0290
-1 0 5 26.6986 -0.0017
-1 0 6 12.6364 -0.0429
-1 0 7 0.1180 -0.0264
-1 0 8 -4.2085 -0.0028
-1 0 9 -4.5752 -0.0157
-1 0 10 -4.8527 -0.0208
-1 0 11 -4.9264 0.0048
-1 0 12 -3.7836 0.0159
-1 0 13 -1.6375 -0.0009
-1 0 14 -0.2172 -0.0045
-1 0 15 -0.9636 0.0127
-1 0 16 -2.8263 0.0146
-1 0 17 -3.8427 -0.0009
-1 0 18 -3.7002 -0.0013
-1 0 19 -2.5303 0.0109
-1 0 20 -0.1357 0.0082
-1 0 21 1.8232 -0.0009
-1 0 22 1.0208 0.0015
-1 1 1 -3.0894 -0.0119
-1 1 2 -10.2267 -0.0514
-1 1 3 9.3403 -0.0264
-1 1 4 29.6748 0.0262
-1 1 5 28.0092 0.0162
-1 1 6 11.4637 -0.0273
-1 1 7 -0.7208 -0.0258
-1 1 8 -2.9928 -0.0002
-1 1 9 -1.7564 -0.0036
-1 1 10 -1.7788 -0.0129
-1 1 11 -2.9147 0.0033
-1 1 12 -3.2274 0.0133
-1 1 13 -1.7183 -0.0036
-1 1 14 -0.1295 -0.0110
-1 1 15 -0.6232 0.0064
-1 1 16 -2.1974 0.0114
-1 1 17 -3.0649 -0.0066
-1 1 18 -3.7925 -0.0113
-1 1 19 -4.4140 0.0041
-1 1 20 -3.2129 0.0092
-1 1 21 -0.9270 0.0039
-1 1 22 -0.4343 0.0053
-1 2 1 -20.5467 0.1527
-1 2 2 -20.9533 0.0442
-1 2 3 2.5797 -0.0104
-1 2 4 22.7965 0.0118
-1 2 5 19.5284 0.0279
-1 2 6 3.4773 0.0042
-1 2 7 -5.4113 -0.0093
-1 2 8 -3.7185 0.0062
-1 2 9 0.3392 0.0140
-1 2 10 1.6214 0.0036
-1 2 11 0.3812 0.0005
-1 2 12 -0.9706 0.0045
-1 2 13 -0.5849 -0.0033
-1 2 14 0.2949 -0.0121
-1 2 15 -0.3333 -0.0052
-1 2 16 -1.2729 -0.0000
-1 2 17 -1.1013 -0.0097
-1 2 18 -1.4931 -0.0123
-1 2 19 -3.1102 0.0004
-1 2 20 -3.5789 0.0051
-1 2 21 -2.4104 -0.0005
-1 2 22 -1.8614 0.0031
-1 2 23 -2.1015 0.0084
-1 3 1 -28.2676 0.2562
-1 3 2 -25.2582 0.1211
-1 3 3 -3.8499 0.0159
-1 3 4 12.0142 -0.0059
-1 3 5 7.2189 0.0160
-1 3 6 -6.1683 0.0159
-1 3 7 -10.7627 -0.0023
-1 3 8 -5.8821 0.0024
-1 3 9 -0.1698 0.0201
-1 3 10 2.1386 0.0132
-1 3 11 1.7361 -0.0071
-1 3 12 0.7673 -0.0079
-1 3 13 0.8443 0.0003
-1 3 14 0.9815 -0.0055
-1 3 15 -0.2593 -0.0131
-1 3 16 -1.2927 -0.0102
-1 3 17 -0.5967 -0.0076
-1 3 18 0.0167 -0.0057
-1 3 19 -0.7357 0.0025
-1 3 20 -1.2681 0.0061
-1 3 21 -1.0014 -0.0004
-1 3 22 -1.4210 -0.0013
-1 3 23 -2.6143 0.0071
-1 4 1 -20.4647 0.1606
-1 4 2 -16.7526 0.0969
-1 4 3 -2.1255 0.0284
-1 4 4 6.5426 -0.0182
-1 4 5 0.3205 -0.0138
-1 4 6 -9.9264 0.0029
-1 4 7 -11.5773 -0.0058
-1 4 8 -5.9462 -0.0072
-1 4 9 -0.5632 0.0150
-1 4 10 1.5638 0.0157
-1 4 11 1.3304 -0.0121
-1 4 12 0.5543 -0.0178
-1 4 13 0.6575 0.0014
-1 4 14 0.9705 0.0022
-1 4 15 0.1444 -0.0116
-1 4 16 -0.9569 -0.0088
-1 4 17 -0.9387 0.0016
-1 4 18 -0.3438 0.0019
-1 4 19 0.1092 0.0032
-1 4 20 0.7536 0.0092
-1 4 21 1.2683 0.0081
-1 4 22 0.5790 0.0025
-1 4 23 -1.4568 0.0017
-1 5 1 -6.8114 -0.0822
-1 5 2 -3.1865 -0.0115
-1 5 3 4.5575 0.0210
-1 5 4 7.4877 -0.0192
-1 5 5 1.5278 -0.0374
-1 5 6 -6.0107 -0.0108
-1 5 7 -7.3462 -0.0023
-1 5 8 -3.4513 -0.0096
-1 5 9 0.5722 0.0066
-1 5 10 2.0242 0.0174
-1 5 11 1.0473 -0.0045
-1 5 12 -0.5984 -0.0168
-1 5 13 -1.0007 -0.0001
-1 5 14 -0.2058 0.0060
-1 5 15 0.1615 -0.0035
-1 5 16 -0.6444 0.0018
-1 5 17 -1.7651 0.0127
-1 5 18 -1.8990 0.0067
-1 5 19 -0.6374 0.0002
-1 5 20 1.0119 0.0068
-1 5 21 1.8745 0.0106
-1 5 22 1.8292 0.0053
-1 5 23 0.7773 0.0008
-1 6 1 1.0111 -0.2717
-1 6 2 3.7172 -0.1055
-1 6 3 6.9803 0.0081
-1 6 4 8.1617 -0.0086
-1 6 5 5.2828 -0.0354
-1 6 6 0.5399 -0.0036
-1 6 7 -2.1064 0.0163
-1 6 8 -1.1753 -0.0027
-1 6 9 1.3222 -0.0044
-1 6 10 2.2978 0.0130
-1 6 11 0.8626 0.0072
-1 6 12 -1.1038 -0.0074
-1 6 13 -1.6282 -0.0013
-1 6 14 -0.8019 0.0072
-1 6 15 -0.3545 0.0056
-1 6 16 -1.7515 0.0100
-1 6 17 -4.0599 0.0145
-1 6 18 -4.3872 0.0055
-1 6 19 -2.0318 -0.0020
-1 6 20 0.1120 0.0018
-1 6 21 0.4042 0.0024
-1 6 22 0.7087 -0.0020
-1 6 23 1.6992 -0.0009
-1 7 1 2.8774 -0.2581
-1 7 2 3.5382 -0.1114
-1 7 3 3.8824 0.0003
-1 7 4 5.2233 0.0057
-1 7 5 6.1439 -0.0113
-1 7 6 4.2201 0.0171
-1 7 7 0.6895 0.0357
-1 7 8 -0.5250 0.0060
-1 7 9 0.8806 -0.0161
-1 7 10 1.4815 -0.0013
-1 7 11 0.3263 0.0084
-1 7 12 -0.3790 -0.0016
-1 7 13 0.1427 -0.0028
-1 7 14 0.6041 0.0076
-1 7 15 -0.2587 0.0119
-1 7 16 -3.0164 0.0091
-1 7 17 -6.0248 0.0038
-1 7 18 -5.7189 -0.0016
-1 7 19 -2.1326 -0.0010
-1 7 20 -0.0735 0.0012
-1 7 21 -1.2549 -0.0037
-1 7 22 -1.6498 -0.0059
-1 7 23 0.5728 0.0020
-1 8 1 3.5040 -0.0718
-1 8 2 2.9560 -0.0447
-1 8 3 1.3455 -0.0061
-1 8 4 1.7944 0.0129
-1 8 5 3.9928 0.0120
-1 8 6 3.6698 0.0228
-1 8 7 0.6003 0.0320
-1 8 8 -0.5733 0.0090
-1 8 9 0.7905 -0.0188
-1 8 10 1.0057 -0.0148
-1 8 11 0.0713 -0.0004
-1 8 12 0.6960 -0.0028
-1 8 13 2.0510 -0.0054
-1 8 14 1.7721 0.0058
-1 8 15 -0.1572 0.0124
-1 8 16 -2.9696 0.0026
-1 8 17 -5.1281 -0.0093
-1 8 18 -3.7344 -0.0084
-1 8 19 0.4328 0.0007
-1 8 20 1.9398 0.0031
-1 8 21 -0.6437 -0.0014
-1 8 22 -2.3026 0.0028
-1 9 1 3.2123 0.1327
-1 9 2 3.7030 0.0296
-1 9 3 1.6383 -0.0123
-1 9 4 0.0614 0.0132
-1 9 5 0.6669 0.0189
-1 9 6 0.4236 0.0001
-1 9 7 -1.0712 0.0002
-1 9 8 -0.2303 0.0048
-1 9 9 2.1140 -0.0088
-1 9 10 1.8825 -0.0169
-1 9 11 0.2027 -0.0082
-1 9 12 0.3552 -0.0045
-1 9 13 0.9036 -0.0068
-1 9 14 -0.2253 0.0002
-1 9 15 -1.6660 0.0061
-1 9 16 -2.5337 -0.0033
-1 9 17 -2.8937 -0.0134
-1 9 18 -1.0641 -0.0084
-1 9 19 2.6245 0.0014
-1 9 20 3.9231 0.0029
-1 9 21 1.6011 0.0032
-1 9 22 -0.4029 0.0118
-1 10 1 1.5175 0.2196
-1 10 2 3.5629 0.0649
-1 10 3 2.1973 -0.0108
-1 10 4 -0.9226 0.0145
-1 10 5 -2.5320 0.0154
-1 10 6 -3.1645 -0.0277
-1 10 7 -2.7065 -0.0315
-1 10 8 0.5963 0.0014
-1 10 9 3.9894 0.0060
-1 10 10 3.1984 -0.0111
-1 10 11 0.0953 -0.0096
-1 10 12 -1.5915 -0.0003
-1 10 13 -2.6090 -0.0028
-1 10 14 -3.7805 -0.0052
-1 10 15 -3.3957 -0.0027
-1 10 16 -1.9892 -0.0045
-1 10 17 -1.5185 -0.0057
-1 10 18 -0.8458 -0.0005
-1 10 19 1.1959 0.0024
-1 10 20 2.5494 0.0029
-1 10 21 2.0938 0.0096
-1 11 1 0.2191 0.1565
-1 11 2 2.2325 0.0537
-1 11 3 1.7534 -0.0030
-1 11 4 -1.3163 0.0133
-1 11 5 -3.7349 0.0103
-1 11 6 -4.4228 -0.0301
-1 11 7 -2.9208 -0.0319
-1 11 8 1.0675 0.0061
-1 11 9 4.1673 0.0140
-1 11 10 2.9493 -0.0071
-1 11 11 -0.4945 -0.0069
-1 11 12 -2.8388 0.0085
-1 11 13 -4.1716 0.0065
-1 11 14 -4.5187 -0.0050
-1 11 15 -2.8896 -0.0068
-1 11 16 -0.8591 -0.0006
-1 11 17 -0.5118 0.0071
-1 11 18 -0.7749 0.0094
-1 11 19 -0.2924 0.0033
-1 11 20 0.2831 0.0045
-1 12 1 0.0405 0.0101
-1 12 2 0.7895 0.0146
-1 12 3 0.9713 -0.0012
-1 12 4 -0.6951 -0.0021
-1 12 5 -2.2077 0.0011
-1 12 6 -2.5438 -0.0085
-1 12 7 -1.6728 -0.0066
-1 12 8 0.1157 0.0101
-1 12 9 0.9525 0.0082
-1 12 10 -0.3027 -0.0079
-1 12 11 -1.8129 -0.0038
-1 12 12 -2.0414 0.0128
-1 12 13 -1.7618 0.0115
-1 12 14 -1.5527 -0.0022
-1 12 15 -1.2697 -0.0058
-1 12 16 -1.0597 0.0036
-1 12 17 -0.2990 0.0143
-1 12 18 1.5184 0.0121
-1 12 19 2.6222 -0.0008
-1 13 1 0.4362 -0.1100
-1 13 2 0.5369 -0.0200
-1 13 3 1.0624 -0.0051
-1 13 4 0.6132 -0.0234
-1 13 5 0.1888 -0.0093
-1 13 6 -0.0241 0.0155
-1 13 7 -0.8570 0.0147
-1 13 8 -2.4634 0.0008
-1 13 9 -4.1978 -0.0067
-1 13 10 -4.8827 -0.0064
-1 13 11 -3.6495 0.0005
-1 13 12 -1.1396 0.0069
-1 13 13 1.0046 0.0034
-1 13 14 1.1540 -0.0044
-1 13 15 -1.3252 -0.0054
-1 13 16 -3.7910 0.0019
-1 13 17 -1.7581 0.0095
-1 13 18 4.0034 0.0050
-1 14 1 1.1111 -0.1317
-1 14 2 2.2831 -0.0261
-1 14 3 3.1970 -0.0016
-1 14 4 3.0520 -0.0271
-1 14 5 2.5308 -0.0081
-1 14 6 1.2040 0.0305
-1 14 7 -1.8127 0.0202
-1 14 8 -5.5118 -0.0136
-1 14 9 -7.3880 -0.0154
-1 14 10 -6.3395 0.0035
-1 14 11 -3.9804 0.0072
-1 14 12 -2.0060 -0.0032
-1 14 13 -0.4453 -0.0091
-1 14 14 -0.3565 -0.0064
-1 14 15 -3.3769 -0.0033
-1 15 1 0.8936 -0.0698
-1 15 2 3.6394 -0.0102
-1 15 3 5.3957 0.0100
-1 15 4 6.1115 -0.0110
-1 15 5 5.6376 0.0003
-1 15 6 2.5732 0.0307
-1 15 7 -2.8932 0.0176
-1 15 8 -7.1619 -0.0142
-1 15 9 -6.6151 -0.0074
-1 15 10 -2.7878 0.0159
-1 15 11 -1.1557 0.0099
-1 15 12 -3.2782 -0.0117
0 -14 1 1.2367 0.0722
0 -14 2 1.3154 0.0279
0 -14 3 4.3135 0.0206
0 -13 1 2.3859 0.0244
0 -13 2 1.6018 -0.0002
0 -13 3 3.3771 0.0210
0 -13 4 6.9940 0.0094
0 -13 5 5.5331 -0.0220
0 -13 6 -1.3036 -0.0105
0 -12 1 0.6224 -0.0784
0 -12 2 0.2658 -0.0500
0 -12 3 2.2673 0.0079
0 -12 4 4.6799 0.0146
0 -12 5 2.2262 -0.0207
0 -12 6 -3.0393 -0.0183
0 -12 7 -4.2206 0.0166
0 -12 8 -1.1159 0.0179
0 -11 1 -1.8639 -0.1469
0 -11 2 -1.7187 -0.0801
0 -11 3 0.9688 -0.0119
0 -11 4 3.2539 0.0141
0 -11 5 1.2302 -0.0070
0 -11 6 -1.9104 -0.0160
0 -11 7 -1.1125 0.0051
0 -11 8 1.6642 0.0070
0 -11 9 2.1031 -0.0136
0 -11 10 0.7176 -0.0072
0 -11 11 -0.2721 0.0179
0 -10 1 -2.0971 -0.1056
0 -10 2 -2.3402 -0.0563
0 -10 3 0.1605 -0.0231
0 -10 4 2.4121 0.0104
0 -10 5 1.3697 0.0127
0 -10 6 0.0273 -0.0065
0 -10 7 1.6123 -0.0067
0 -10 8 3.4056 -0.0011
0 -10 9 2.7064 -0.0151
0 -10 10 1.4134 -0.0212
0 -10 11 1.0069 -0.0009
0 -10 12 0.3753 0.0094
0 -9 1 -0.9070 0.0349
0 -9 2 -1.5395 0.0094
0 -9 3 0.5437 -0.0231
0 -9 4 2.3835 0.0026
0 -9 5 1.3608 0.0263
0 -9 6 0.2170 0.0034
0 -9 7 1.5228 -0.0142
0 -9 8 2.8741 -0.0009
0 -9 9 2.2790 0.0007
0 -9 10 1.3683 -0.0142
0 -9 11 1.0203 -0.0051
0 -9 12 0.2811 0.0174
0 -9 13 -0.5174 0.0079
0 -9 14 -0.4222 -0.0192
0 -8 1 -0.8321 0.1821
0 -8 2 -0.7669 0.0763
0 -8 3 1.8015 -0.0130
0 -8 4 3.1083 -0.0098
0 -8 5 0.8850 0.0198
0 -8 6 -1.5193 0.0034
0 -8 7 -0.9214 -0.0179
0 -8 8 0.9327 0.0014
0 -8 9 1.4892 0.0168
0 -8 10 0.8874 -0.0023
0 -8 11 -0.0733 -0.0068
0 -8 12 -1.0735 0.0227
0 -8 13 -1.4645 0.0286
0 -8 14 -0.9832 -0.0067
0 -8 15 -0.2778 -0.0234
0 -7 1 -0.7141 0.2197
0 -7 2 0.5514 0.1049
0 -7 3 3.6364 0.0117
0 -7 4 3.9940 -0.0153
0 -7 5 0.3169 -0.0035
0 -7 6 -3.0920 -0.0069
0 -7 7 -2.6559 -0.0172
0 -7 8 0.0589 0.0013
0 -7 9 1.5853 0.0220
0 -7 10 0.7833 0.0045
0 -7 11 -0.9869 -0.0150
0 -7 12 -1.9952 0.0073
0 -7 13 -1.8303 0.0288
0 -7 14 -1.1727 0.0056
0 -7 15 -0.4646 -0.0182
0 -7 16 0.1978 -0.0046
0 -7 17 0.4793 0.0066
0 -6 1 1.2670 0.0924
0 -6 2 3.0828 0.0700
0 -6 3 5.0377 0.0400
0 -6 4 3.7081 -0.0070
0 -6 5 -0.4066 -0.0250
0 -6 6 -3.0396 -0.0142
0 -6 7 -1.8155 -0.0093
0 -6 8 1.3517 -0.0017
0 -6 9 2.9264 0.0180
0 -6 10 1.5598 0.0149
0 -6 11 -0.7059 -0.0121
0 -6 12 -1.4446 -0.0132
0 -6 13 -0.9309 0.0095
0 -6 14 -0.4738 0.0067
0 -6 15 0.0645 -0.0110
0 -6 16 0.7891 -0.0027
0 -6 17 0.7237 0.0103
0 -6 18 -0.0267 -0.0004
0 -5 1 2.8557 -0.1283
0 -5 2 3.7463 -0.0179
0 -5 3 2.7575 0.0423
0 -5 4 0.0279 0.0003
0 -5 5 -2.4206 -0.0323
0 -5 6 -2.3653 -0.0065
0 -5 7 0.0541 0.0062
0 -5 8 2.9728 -0.0087
0 -5 9 4.0978 0.0037
0 -5 10 2.5277 0.0261
0 -5 11 0.3233 0.0084
0 -5 12 -0.2428 -0.0164
0 -5 13 0.0764 -0.0064
0 -5 14 0.0727 0.0055
0 -5 15 0.5754 -0.0032
0 -5 16 1.5210 -0.0020
0 -5 17 1.1434 0.0105
0 -5 18 -0.2175 0.0072
0 -5 19 -0.3935 -0.0015
0 -4 1 3.7309 -0.2741
0 -4 2 0.7355 -0.0968
0 -4 3 -4.4309 0.0118
0 -4 4 -7.0768 -0.0078
0 -4 5 -5.7851 -0.0267
0 -4 6 -2.3616 0.0151
0 -4 7 0.7444 0.0279
0 -4 8 2.9342 -0.0126
0 -4 9 3.8360 -0.0176
0 -4 10 2.7169 0.0210
0 -4 11 0.8534 0.0230
0 -4 12 0.1281 -0.0090
0 -4 13 0.0117 -0.0107
0 -4 14 -0.1650 0.0078
0 -4 15 0.6358 0.0053
0 -4 16 1.8323 -0.0032
0 -4 17 1.1570 0.0024
0 -4 18 -0.7434 0.0074
0 -4 19 -1.0979 0.0079
0 -4 20 0.0396 0.0081
0 -3 1 9.7363 -0.2308
0 -3 2 -1.1235 -0.0972
0 -3 3 -11.3294 -0.0152
0 -3 4 -12.6073 -0.0177
0 -3 5 -7.1819 -0.0143
0 -3 6 -1.7999 0.0329
0 -3 7 0.4375 0.0457
0 -3 8 1.4433 -0.0027
0 -3 9 2.4454 -0.0281
0 -3 10 2.1264 0.0010
0 -3 11 0.6080 0.0155
0 -3 12 -0.3902 -0.0060
0 -3 13 -0.6368 -0.0111
0 -3 14 -0.3673 0.0069
0 -3 15 0.9461 0.0095
0 -3 16 2.1643 -0.0029
0 -3 17 1.1482 -0.0069
0 -3 18 -1.1760 -0.0017
0 -3 19 -1.9262 0.0057
0 -3 20 -0.8564 0.0089
0 -3 21 -0.0106 0.0016
0 -2 1 23.0965 -0.0643
0 -2 2 2.4240 -0.0239
0 -2 3 -12.1994 -0.0029
0 -2 4 -11.1207 -0.0028
0 -2 5 -2.7033 0.0017
0 -2 6 1.7492 0.0260
0 -2 7 0.6726 0.0388
0 -2 8 -0.6305 0.0121
0 -2 9 0.0939 -0.0191
0 -2 10 0.5665 -0.0160
0 -2 11 -0.2584 -0.0007
0 -2 12 -0.9633 -0.0026
0 -2 13 -0.7687 -0.0074
0 -2 14 0.1743 -0.0003
0 -2 15 1.6295 0.0055
0 -2 16 2.4295 0.0008
0 -2 17 1.3468 -0.0063
0 -2 18 -0.6826 -0.0067
0 -2 19 -1.5613 -0.0004
0 -2 20 -0.8129 0.0004
0 -2 21 0.2267 -0.0078
0 -1 1 35.8899 0.0470
0 -1 2 7.4952 0.0368
0 -1 3 -8.3596 0.0295
0 -1 5 7.2042 0.0191
0 -1 6 8.3831 -0.0037
0 -1 7 2.0519 0.0007
0 -1 8 -2.7664 0.0105
0 -1 9 -3.1725 -0.0064
0 -1 10 -2.2426 -0.0234
0 -1 11 -2.0087 -0.0101
0 -1 12 -1.7743 0.0086
0 -1 13 -0.7272 0.0045
0 -1 14 0.8139 -0.0067
0 -1 15 1.8507 -0.0028
0 -1 16 1.6655 0.0056
0 -1 17 0.6167 0.0014
0 -1 18 -0.3435 -0.0044
0 -1 19 -0.5748 0.0007
0 -1 20 0.1555 0.0009
0 -1 21 1.2685 -0.0112
0 -1 22 1.2564 -0.0105
0 0 2 7.3507 0.0229
0 0 3 -5.0902 0.0302
0 0 4 5.9419 0.0532
0 0 5 18.0080 0.0300
0 0 6 15.2355 -0.0281
0 0 7 3.8259 -0.0386
0 0 8 -3.9296 -0.0053
0 0 9 -5.2458 -0.0016
0 0 10 -4.0943 -0.0236
0 0 11 -3.2908 -0.0128
0 0 12 -2.7260 0.0181
0 0 13 -1.2940 0.0158
0 0 14 0.7761 -0.0081
0 0 15 1.5419 -0.0070
0 0 16 0.2851 0.0098
0 0 17 -1.1416 0.0064
0 0 18 -1.3942 -0.0054
0 0 19 -0.9844 0.0015
0 0 20 -0.0178 0.0102
0 0 21 1.5156 0.0012
0 0 22 1.9172 -0.0050
0 1 2 -0.6602 -0.0176
0 1 3 -5.7857 -0.0094
0 1 4 11.7077 0.0265
0 1 5 24.7127 0.0247
0 1 6 18.5916 -0.0250
0 1 7 4.3252 -0.0441
0 1 8 -3.7729 -0.0123
0 1 9 -4.2087 0.0039
0 1 10 -2.3114 -0.0119
0 1 11 -1.5547 -0.0089
0 1 12 -1.9262 0.0158
0 1 13 -1.3400 0.0147
0 1 14 0.7313 -0.0079
0 1 15 1.5663 -0.0071
0 1 16 -0.2310 0.0108
0 1 17 -2.1568 0.0061
0 1 18 -2.4727 -0.0108
0 1 19 -2.2507 -0.0052
0 1 20 -1.6602 0.0109
0 1 21 0.0241 0.0111
0 1 22 1.3429 0.0069
0 1 23 0.6882 0.0047
0 2 0 27.3157 0.0929
0 2 1 7.3766 0.0702
0 2 2 -14.2151 0.0035
0 2 3 -11.1644 -0.0391
0 2 4 10.8734 -0.0212
0 2 5 23.6678 0.0068
0 2 6 15.8564 -0.0016
0 2 7 1.8682 -0.0174
0 2 8 -4.0072 -0.0048
0 2 9 -2.1753 0.0135
0 2 10 1.1077 0.0102
0 2 11 2.2143 0.0022
0 2 12 1.0977 0.0062
0 2 13 0.4574 0.0057
0 2 14 1.6950 -0.0061
0 2 15 2.1485 -0.0078
0 2 16 0.0892 0.0027
0 2 17 -1.9195 0.0005
0 2 18 -2.1222 -0.0125
0 2 19 -2.0441 -0.0108
0 2 20 -2.1852 0.0012
0 2 21 -1.3566 0.0042
0 2 22 -0.0649 0.0059
0 2 23 0.3186 0.0122
0 3 0 7.3528 0.2880
0 3 1 -10.5154 0.2145
0 3 2 -25.0434 0.0781
0 3 3 -17.2838 -0.0222
0 3 4 4.4563 -0.0416
0 3 5 15.3146 -0.0080
0 3 6 7.9766 0.0182
0 3 7 -2.9358 0.0113
0 3 8 -5.6962 0.0020
0 3 9 -2.1918 0.0148
0 3 10 1.9778 0.0246
0 3 11 3.9783 0.0101
0 3 12 3.4387 -0.0050
0 3 13 2.4885 -0.0019
0 3 14 2.7883 0.0006
0 3 15 2.4961 -0.0074
0 3 16 0.2596 -0.0106
0 3 17 -1.5585 -0.0075
0 3 18 -1.2491 -0.0084
0 3 19 -0.3925 -0.0086
0 3 20 -0.3215 -0.0052
0 3 21 -0.5449 -0.0055
0 3 22 -0.6769 -0.0046
0 3 23 -0.7764 0.0054
0 4 0 -1.4895 0.3340
0 4 1 -14.6593 0.2362
0 4 2 -23.4351 0.1012
0 4 3 -16.2393 0.0142
0 4 4 -0.3413 -0.0218
0 4 5 6.6108 -0.0127
0 4 6 0.8783 0.0177
0 4 7 -6.1434 0.0215
0 4 8 -6.7934 0.0016
0 4 9 -3.2574 0.0046
0 4 10 0.6611 0.0212
0 4 11 3.1011 0.0075
0 4 12 3.2638 -0.0165
0 4 13 2.3922 -0.0090
0 4 14 2.1829 0.0068
0 4 15 1.8296 -0.0029
0 4 16 0.1783 -0.0152
0 4 17 -1.3599 -0.0083
0 4 18 -0.9745 -0.0009
0 4 19 0.8665 -0.0029
0 4 20 2.2522 -0.0028
0 4 21 1.8583 -0.0015
0 4 22 0.1781 -0.0041
0 4 23 -1.1873 -0.0033
0 4 24 -1.8239 0.0026
0 5 0 -0.6476 0.1387
0 5 1 -6.9556 0.0584
0 5 2 -10.9369 0.0158
0 5 3 -6.8690 0.0243
0 5 4 1.4064 0.0103
0 5 5 4.4122 -0.0143
0 5 6 0.3432 -0.0010
0 5 7 -4.3598 0.0161
0 5 8 -5.2193 0.0013
0 5 9 -2.9501 -0.0054
0 5 10 0.2902 0.0105
0 5 11 2.4917 0.0044
0 5 12 2.4135 -0.0201
0 5 13 1.0599 -0.0159
0 5 14 0.3686 0.0045
0 5 15 0.4125 0.0019
0 5 16 -0.1869 -0.0070
0 5 17 -1.5705 0.0011
0 5 18 -1.7975 0.0066
0 5 19 0.5857 0.0003
0 5 20 3.5884 0.0016
0 5 21 3.7700 0.0088
0 5 22 1.3461 0.0055
0 5 23 -0.4797 -0.0027
0 5 24 -1.0086 -0.0039
0 6 0 1.0086 -0.1464
0 6 1 0.5438 -0.1770
0 6 2 -0.0862 -0.1048
0 6 3 1.4094 0.0045
0 6 4 4.7396 0.0267
0 6 5 6.5123 -0.0151
0 6 6 4.6041 -0.0185
0 6 7 0.4329 0.0095
0 6 8 -2.5736 0.0058
0 6 9 -2.1163 -0.0095
0 6 10 0.6654 0.0014
0 6 11 2.6422 0.0082
0 6 12 2.3934 -0.0086
0 6 13 0.9956 -0.0148
0 6 14 -0.0617 -0.0015
0 6 15 -0.4066 0.0049
0 6 16 -1.1389 0.0050
0 6 17 -3.1537 0.0099
0 6 18 -4.2925 0.0081
0 6 19 -1.5769 0.0001
0 6 20 2.8151 0.0035
0 6 21 3.6457 0.0107
0 6 22 1.1039 0.0049
0 6 23 -0.0968 -0.0040
0 7 0 0.8646 -0.2886
0 7 1 2.6490 -0.2627
0 7 2 2.9116 -0.1435
0 7 3 2.5849 -0.0163
0 7 4 3.7144 0.0221
0 7 5 6.3875 -0.0090
0 7 6 7.0762 -0.0164
0 7 7 3.1497 0.0102
0 7 8 -1.8294 0.0112
0 7 9 -2.6386 -0.0107
0 7 10 -0.0437 -0.0081
0 7 11 1.9286 0.0096
0 7 12 2.4380 0.0066
0 7 13 2.4014 -0.0055
0 7 14 1.5605 -0.0023
0 7 15 -0.0015 0.0084
0 7 16 -2.0232 0.0127
0 7 17 -4.9037 0.0095
0 7 18 -6.6208 0.0023
0 7 19 -3.8865 0.0001
0 7 20 0.8700 0.0061
0 7 21 1.6582 0.0063
0 7 22 -0.9560 -0.0044
0 7 23 -1.2809 -0.0092
0 8 0 1.3113 -0.1981
0 8 1 3.2447 -0.1368
0 8 2 3.3572 -0.0688
0 8 3 1.6232 -0.0204
0 8 4 0.8590 0.0049
0 8 5 3.4171 0.0036
0 8 6 5.4711 -0.0008
0 8 7 2.1977 0.0097
0 8 8 -2.8637 0.0114
0 8 9 -3.3497 -0.0072
0 8 10 -0.5280 -0.0145
0 8 11 1.2719 0.0009
0 8 12 2.4055 0.0090
0 8 13 3.6146 0.0004
0 8 14 2.8179 -0.0013
0 8 15 0.1515 0.0093
0 8 16 -2.1813 0.0126
0 8 17 -4.1499 0.0029
0 8 18 -5.1646 -0.0034
0 8 19 -2.8464 0.0036
0 8 20 0.7607 0.0109
0 8 21 0.4738 0.0044
0 8 22 -2.6311 -0.0060
0 8 23 -2.8702 -0.0041
0 9 0 1.4694 0.0204
0 9 1 3.9394 0.0787
0 9 2 5.0293 0.0470
0 9 3 3.0233 -0.0126
0 9 4 0.1292 -0.0112
0 9 5 0.5589 0.0145
0 9 6 2.0800 0.0070
0 9 7 -0.2253 -0.0055
0 9 8 -3.4018 0.0031
0 9 9 -2.0280 0.0038
0 9 10 1.3391 -0.0100
0 9 11 2.3635 -0.0104
0 9 12 2.6498 -0.0004
0 9 13 3.2806 -0.0014
0 9 14 1.7256 -0.0044
0 9 15 -1.1534 0.0026
0 9 16 -1.9567 0.0049
0 9 17 -1.3347 -0.0032
0 9 18 -0.8554 -0.0036
0 9 19 0.8986 0.0074
0 9 20 3.1156 0.0109
0 9 21 2.1217 0.0027
0 9 22 -1.2603 -0.0003
0 10 0 -0.0440 0.1868
0 10 1 2.9429 0.2112
0 10 2 5.4920 0.1128
0 10 3 4.2763 -0.0020
0 10 4 0.1114 -0.0138
0 10 5 -1.8985 0.0196
0 10 6 -1.6580 0.0022
0 10 7 -2.7267 -0.0263
0 10 8 -3.0431 -0.0065
0 10 9 0.5749 0.0171
0 10 10 4.1258 0.0016
0 10 11 3.6068 -0.0153
0 10 12 1.7912 -0.0078
0 10 13 0.8380 -0.0016
0 10 14 -0.9151 -0.0058
0 10 15 -2.3906 -0.0049
0 10 16 -1.0729 -0.0018
0 10 17 1.0185 -0.0026
0 10 18 1.4981 0.0013
0 10 19 2.2160 0.0065
0 10 20 3.9714 0.0022
0 10 21 4.0832 -0.0023
0 10 22 1.9204 0.0024
0 11 0 -0.8867 0.1904
0 11 1 0.9455 0.1788
0 11 2 3.4726 0.0934
0 11 3 3.3032 0.0055
0 11 4 -0.3950 -0.0053
0 11 5 -3.4864 0.0179
0 11 6 -4.3792 -0.0004
0 11 7 -4.6780 -0.0254
0 11 8 -2.9792 -0.0022
0 11 9 1.6748 0.0249
0 11 10 4.6413 0.0078
0 11 11 2.7514 -0.0147
0 11 12 -0.5585 -0.0065
0 11 13 -2.1628 0.0050
0 11 14 -2.6095 0.0004
0 11 15 -1.6998 -0.0032
0 11 16 0.7435 0.0014
0 11 17 2.0626 0.0069
0 11 18 1.0994 0.0095
0 11 19 0.6406 0.0030
0 11 20 2.1119 -0.0081
0 11 21 3.4509 -0.0048
0 12 0 0.2923 0.0542
0 12 1 -0.5152 0.0291
0 12 2 0.4789 0.0191
0 12 3 1.4223 0.0058
0 12 4 -0.0482 -0.0021
0 12 5 -2.3414 0.0037
0 12 6 -3.8130 0.0047
0 12 7 -4.4715 0.0033
0 12 8 -3.2039 0.0158
0 12 9 0.0192 0.0223
0 12 10 1.8375 0.0040
0 12 11 0.4861 -0.0108
0 12 12 -1.4942 -0.0006
0 12 13 -1.8866 0.0105
0 12 14 -1.0010 0.0065
0 12 15 0.4498 0.0029
0 12 16 1.5243 0.0082
0 12 17 1.2732 0.0153
0 12 18 0.6801 0.0146
0 12 19 1.2455 0.0001
0 12 20 2.2356 -0.0127
0 13 0 1.1123 -0.0990
0 13 1 -1.7223 -0.1170
0 13 2 -2.0262 -0.0500
0 13 3 -0.2115 0.0020
0 13 4 0.5454 -0.0090
0 13 5 -0.2163 -0.0193
0 13 6 -1.3609 0.0078
0 13 7 -2.4840 0.0319
0 13 8 -3.2197 0.0253
0 13 9 -3.2710 0.0062
0 13 10 -2.8287 -0.0047
0 13 11 -1.7584 -0.0033
0 13 12 0.1287 0.0039
0 13 13 2.1942 0.0059
0 13 14 3.3931 0.0028
0 13 15 2.6790 0.0023
0 13 16 0.0255 0.0052
0 13 17 -1.7195 0.0086
0 13 18 0.5458 0.0080
0 14 0 -0.2682 -0.1498
0 14 1 -2.5605 -0.1596
0 14 2 -2.2871 -0.0697
0 14 3 -0.2935 0.0034
0 14 4 0.4638 -0.0113
0 14 5 -0.2114 -0.0311
0 14 6 -0.8788 0.0061
0 14 7 -1.5682 0.0373
0 14 8 -3.3932 0.0135
0 14 9 -5.8665 -0.0171
0 14 10 -6.3492 -0.0119
0 14 11 -3.4395 0.0048
0 14 12 0.8422 0.0043
0 14 13 4.0626 -0.0042
0 14 14 5.3805 -0.0040
0 14 15 3.5243 -0.0006
0 14 16 -1.3569 -0.0049
0 15 2 -0.0587 -0.0398
0 15 3 1.8767 0.0110
0 15 4 1.2117 0.0001
0 15 5 -0.6256 -0.0211
0 15 6 -1.4963 0.0039
0 15 7 -1.7510 0.0250
0 15 8 -3.2468 -0.0028
0 15 9 -5.5093 -0.0293
0 15 10 -5.5017 -0.0141
0 15 11 -2.8448 0.0057
0 15 12 -0.8537 -0.0012
1 -14 0 1.4844 0.1906
1 -14 1 2.2130 0.1206
1 -14 2 1.5001 0.0144
1 -14 3 2.6564 -0.0253
1 -13 0 2.6743 0.1780
1 -13 1 4.3199 0.1279
1 -13 2 2.1205 0.0270
1 -13 3 0.4569 -0.0134
1 -13 4 4.0866 -0.0070
1 -13 5 7.3226 -0.0125
1 -13 6 2.8223 -0.0143
1 -12 0 1.7865 0.0170
1 -12 1 3.7266 0.0179
1 -12 2 1.7543 -0.0054
1 -12 3 -0.9935 -0.0036
1 -12 4 0.1000 0.0112
1 -12 5 1.2062 -0.0039
1 -12 6 -2.4400 -0.0208
1 -12 7 -6.4371 0.0000
1 -12 8 -5.0577 0.0213
1 -12 9 -0.9501 0.0086
1 -11 0 -0.1115 -0.1850
1 -11 1 1.2250 -0.1226
1 -11 2 0.5327 -0.0503
1 -11 3 -1.1069 -0.0052
1 -11 4 -0.7555 0.0174
1 -11 5 -0.9154 0.0104
1 -11 6 -3.8257 -0.0084
1 -11 7 -5.4802 -0.0022
1 -11 8 -3.0621 0.0123
1 -11 9 -0.0170 0.0010
1 -11 10 0.6869 -0.0098
1 -11 11 0.2651 0.0090
1 -10 0 -0.3722 -0.2715
1 -10 1 -0.4363 -0.1696
1 -10 2 -0.8155 -0.0529
1 -10 3 -1.1800 -0.0078
1 -10 4 -0.0450 0.0067
1 -10 5 0.4355 0.0162
1 -10 6 -1.0893 0.0065
1 -10 7 -1.7515 -0.0046
1 -10 8 -0.3886 -0.0011
1 -10 9 0.5243 -0.0058
1 -10 10 0.3891 -0.0196
1 -10 11 0.6600 -0.0117
1 -10 12 0.8263 0.0101
1 -10 13 -0.0050 0.0092
1 -9 0 1.3370 -0.1605
1 -9 1 -0.1826 -0.0756
1 -9 2 -1.3974 -0.0034
1 -9 3 -1.2161 -0.0069
1 -9 4 0.9274 -0.0124
1 -9 5 2.4456 0.0125
1 -9 6 1.8773 0.0146
1 -9 7 1.1548 -0.0092
1 -9 8 1.0911 -0.0114
1 -9 9 0.5876 0.0001
1 -9 10 0.2135 -0.0093
1 -9 11 0.9153 -0.0188
1 -9 12 1.3327 -0.0025
1 -9 13 0.5047 0.0087
1 -9 14 -0.1562 -0.0074
1 -8 0 1.8868 0.0887
1 -8 1 -0.6729 0.0958
1 -8 2 -2.2014 0.0598
1 -8 3 -0.8934 -0.0063
1 -8 4 2.2520 -0.0285
1 -8 5 3.6880 0.0023
1 -8 6 2.3352 0.0132
1 -8 7 0.6072 -0.0116
1 -8 8 -0.0162 -0.0136
1 -8 9 -0.0808 0.0118
1 -8 10 0.2342 0.0108
1 -8 11 0.8421 -0.0112
1 -8 12 0.8084 -0.0043
1 -8 13 -0.0093 0.0163
1 -8 14 -0.4632 0.0037
1 -8 15 -0.1316 -0.0174
1 -8 16 0.1903 -0.0028
1 -7 0 0.4466 0.3002
1 -7 1 -2.6996 0.2159
1 -7 2 -3.3570 0.0910
1 -7 3 -0.1502 0.0020
1 -7 4 3.6421 -0.0246
1 -7 5 3.8028 -0.0078
1 -7 6 0.6278 0.0038
1 -7 7 -2.1609 -0.0077
1 -7 8 -2.4162 -0.0068
1 -7 9 -0.9897 0.0168
1 -7 10 0.3506 0.0192
1 -7 11 0.6236 -0.0070
1 -7 12 0.0110 -0.0089
1 -7 13 -0.7101 0.0188
1 -7 14 -1.0097 0.0200
1 -7 15 -0.7748 -0.0063
1 -7 16 -0.2098 -0.0079
1 -7 17 0.2193 0.0081
1 -6 0 -1.2578 0.2990
1 -6 1 -3.0740 0.1772
1 -6 2 -2.0708 0.0619
1 -6 3 1.9702 0.0222
1 -6 4 4.7491 0.0063
1 -6 5 3.0302 -0.0096
1 -6 6 -1.1885 -0.0071
1 -6 7 -3.9112 0.0021
1 -6 8 -3.4272 0.0046
1 -6 9 -1.0011 0.0124
1 -6 10 0.7824 0.0151
1 -6 11 0.7116 -0.0060
1 -6 12 -0.0755 -0.0188
1 -6 13 -0.4740 0.0041
1 -6 14 -0.7396 0.0219
1 -6 15 -0.7774 0.0063
1 -6 16 -0.0961 -0.0053
1 -6 17 0.5801 0.0021
1 -6 18 0.5035 -0.0010
1 -5 0 -4.9533 0.0652
1 -5 1 -1.6207 -0.0155
1 -5 2 1.6796 -0.0246
1 -5 3 4.4330 0.0329
1 -5 4 4.4349 0.0394
1 -5 5 1.4333 -0.0058
1 -5 6 -1.7532 -0.0135
1 -5 7 -2.9488 0.0112
1 -5 8 -1.8998 0.0098
1 -5 9 0.4067 -0.0011
1 -5 10 1.8854 0.0078
1 -5 11 1.4974 0.0045
1 -5 12 0.6600 -0.0176
1 -5 13 0.3585 -0.0146
1 -5 14 -0.0690 0.0092
1 -5 15 -0.2501 0.0111
1 -5 16 0.6882 -0.0005
1 -5 17 1.4836 0.0005
1 -5 18 0.9350 0.0008
1 -5 19 0.3557 -0.0059
1 -4 0 -11.4219 -0.2192
1 -4 1 -0.8133 -0.2221
1 -4 2 3.9423 -0.1181
1 -4 3 3.2441 0.0112
1 -4 4 0.0931 0.0388
1 -4 5 -2.2207 -0.0074
1 -4 6 -2.0732 -0.0127
1 -4 7 -0.7255 0.0162
1 -4 8 0.6969 0.0043
1 -4 9 2.3886 -0.0213
1 -4 10 3.4254 -0.0032
1 -4 11 2.7819 0.0178
1 -4 12 1.5792 -0.0023
1 -4 13 0.7889 -0.0188
1 -4 14 0.0180 -0.0015
1 -4 15 -0.0559 0.0107
1 -4 16 1.2674 0.0019
1 -4 17 2.1312 -0.0022
1 -4 18 1.1566 0.0018
1 -4 19 0.1533 0.0035
1 -4 20 0.4559 0.0053
1 -3 0 -12.2622 -0.3251
1 -3 1 3.2206 -0.2758
1 -3 2 5.5014 -0.1419
1 -3 3 -1.4685 -0.0244
1 -3 4 -7.6665 0.0042
1 -3 5 -7.6155 -0.0161
1 -3 6 -3.2648 -0.0066
1 -3 7 0.3743 0.0180
1 -3 8 1.9170 -0.0005
1 -3 9 3.2465 -0.0324
1 -3 10 4.3410 -0.0164
1 -3 11 3.7924 0.0161
1 -3 12 2.1984 0.0097
1 -3 13 0.7923 -0.0095
1 -3 14 -0.1497 -0.0023
1 -3 15 0.0524 0.0090
1 -3 16 1.4633 0.0021
1 -3 17 2.0088 -0.0065
1 -3 18 0.6378 -0.0045
1 -3 19 -0.6592 0.0038
1 -3 20 -0.4360 0.0129
1 -3 21 0.1821 0.0127
1 -2 0 1.0458 -0.1992
1 -2 1 16.9040 -0.1449
1 -2 2 11.8804 -0.0653
1 -2 3 -3.8585 -0.0252
1 -2 4 -13.0075 -0.0195
1 -2 5 -10.3071 -0.0172
1 -2 6 -3.1487 -0.0026
1 -2 7 0.5834 0.0119
1 -2 8 0.9048 0.0030
1 -2 9 1.6495 -0.0192
1 -2 10 3.2047 -0.0195
1 -2 11 3.4894 0.0005
1 -2 12 2.3108 0.0089
1 -2 13 0.9575 0.0025
1 -2 14 0.3208 0.0003
1 -2 15 0.8480 0.0026
1 -2 16 1.8816 0.0003
1 -2 17 1.7143 -0.0056
1 -2 18 0.0904 -0.0090
1 -2 19 -1.2505 -0.0039
1 -2 20 -1.2255 0.0064
1 -2 21 -0.4161 0.0071
1 -2 22 0.2780 -0.0004
1 -1 0 23.0350 -0.0070
1 -1 1 36.1826 0.0285
1 -1 2 21.9228 0.0465
1 -1 3 -2.0539 0.0214
1 -1 5 -6.8676 0.0040
1 -1 6 1.0817 -0.0035
1 -1 7 2.0617 -0.0077
1 -1 8 -0.9278 0.0049
1 -1 9 -1.8702 0.0077
1 -1 10 -0.1740 -0.0088
1 -1 11 1.3778 -0.0137
1 -1 12 1.4508 0.0032
1 -1 13 0.8552 0.0126
1 -1 14 0.9163 0.0005
1 -1 15 1.8550 -0.0108
1 -1 16 2.3566 -0.0058
1 -1 17 1.4381 -0.0001
1 -1 18 -0.0529 -0.0052
1 -1 19 -0.9214 -0.0067
1 -1 20 -0.9977 0.0002
1 -1 21 -0.4179 -0.0022
1 -1 22 0.4317 -0.0108
1 0 2 27.0058 0.0889
1 0 3 -1.0284 0.0608
1 0 4 -9.2375 0.0454
1 0 5 0.2456 0.0350
1 0 6 7.9311 -0.0032
1 0 7 4.9380 -0.0286
1 0 8 -1.8680 -0.0016
1 0 9 -4.6923 0.0249
1 0 10 -3.2012 0.0038
1 0 11 -0.8520 -0.0191
1 0 12 -0.0136 -0.0009
1 0 13 -0.2648 0.0182
1 0 14 0.3811 0.0002
1 0 15 2.0037 -0.0211
1 0 16 2.3294 -0.0114
1 0 17 0.7978 0.0038
1 0 18 -0.5093 -0.0012
1 0 19 -0.6526 -0.0059
1 0 20 -0.4995 0.0021
1 0 21 -0.1530 0.0014
1 0 22 0.5135 -0.0088
1 0 23 0.4889 -0.0073
1 1 0 41.8339 0.0331
1 1 1 46.4581 0.0342
1 1 2 21.8671 0.0399
1 1 3 -4.2527 0.0366
1 1 4 -6.8169 0.0423
1 1 5 6.6546 0.0392
1 1 6 13.3970 0.0005
1 1 7 7.0826 -0.0302
1 1 8 -1.6701 -0.0067
1 1 9 -4.6355 0.0254
1 1 10 -2.7333 0.0110
1 1 11 -0.1845 -0.0152
1 1 12 0.1495 -0.0045
1 1 13 -1.0477 0.0143
1 1 14 -0.6427 0.0011
1 1 15 1.5569 -0.0175
1 1 16 2.0854 -0.0073
1 1 17 0.1088 0.0074
1 1 18 -1.3688 -0.0001
1 1 19 -1.1432 -0.0076
1 1 20 -0.6814 0.0022
1 1 21 -0.3402 0.0080
1 1 22 0.2986 0.0030
1 1 23 0.4722 0.0033
1 2 0 31.1145 0.0381
1 2 2 8.4932 -0.0132
1 2 3 -10.6675 -0.0293
1 2 4 -6.2421 -0.0163
1 2 5 9.8278 0.0045
1 2 6 15.1061 0.0022
1 2 7 7.1531 -0.0108
1 2 8 -1.1141 -0.0032
1 2 9 -2.5476 0.0154
1 2 10 0.4052 0.0140
1 2 11 3.2156 -0.0026
1 2 12 2.9986 -0.0056
1 2 13 0.6173 0.0035
1 2 14 0.0030 0.0028
1 2 15 1.8227 -0.0038
1 2 16 2.1770 0.0019
1 2 17 -0.1704 0.0100
1 2 18 -1.9541 0.0032
1 2 19 -1.6086 -0.0062
1 2 20 -0.7825 -0.0032
1 2 21 -0.3591 0.0016
1 2 22 0.0695 0.0034
1 2 23 0.4030 0.0111
1 2 24 0.4312 0.0133
1 3 0 15.2721 0.1455
1 3 1 11.7016 0.1054
1 3 2 -6.4028 0.0038
1 3 3 -17.3491 -0.0650
1 3 4 -8.0796 -0.0679
1 3 5 8.0374 -0.0321
1 3 6 12.2590 0.0033
1 3 7 5.2074 0.0134
1 3 8 -0.9178 0.0027
1 3 9 -1.0305 -0.0006
1 3 10 2.1521 0.0097
1 3 11 5.1878 0.0099
1 3 12 5.5596 -0.0033
1 3 13 3.4069 -0.0049
1 3 14 2.1145 0.0067
1 3 15 2.8432 0.0096
1 3 16 2.5106 0.0039
1 3 17 -0.1222 0.0042
1 3 18 -2.1609 0.0061
1 3 19 -1.6927 0.0008
1 3 20 -0.1083 -0.0066
1 3 21 0.7428 -0.0112
1 3 22 0.5216 -0.0101
1 3 23 0.0802 0.0014
1 3 24 0.2120 0.0130
1 4 0 4.3760 0.2388
1 4 1 -0.9763 0.1948
1 4 2 -13.6426 0.0516
1 4 3 -19.1230 -0.0441
1 4 4 -10.0834 -0.0582
1 4 5 2.7443 -0.0319
1 4 6 6.4732 0.0070
1 4 7 2.4439 0.0271
1 4 8 -1.0011 0.0071
1 4 9 -0.9916 -0.0155
1 4 10 1.0382 -0.0032
1 4 11 3.6393 0.0109
1 4 12 4.8703 -0.0027
1 4 13 3.8563 -0.0089
1 4 14 2.6749 0.0104
1 4 15 2.7798 0.0170
1 4 16 2.4342 -0.0002
1 4 17 0.2675 -0.0064
1 4 18 -1.9367 0.0040
1 4 19 -1.7043 0.0050
1 4 20 0.7397 -0.0061
1 4 21 2.5220 -0.0141
1 4 22 1.6755 -0.0156
1 4 23 -0.2299 -0.0116
1 4 24 -0.7627 -0.0031
1 5 0 2.0892 0.1807
1 5 1 -1.9851 0.1503
1 5 2 -9.3122 0.0455
1 5 3 -12.5204 -0.0046
1 5 4 -7.6249 -0.0032
1 5 5 -0.1742 -0.0036
1 5 6 2.9282 0.0049
1 5 7 1.7016 0.0230
1 5 8 -0.3002 0.0108
1 5 9 -1.2184 -0.0180
1 5 10 -0.5227 -0.0142
1 5 11 1.4210 0.0038
1 5 12 2.7545 -0.0040
1 5 13 2.2290 -0.0117
1 5 14 1.0403 0.0062
1 5 15 0.8485 0.0149
1 5 16 1.2423 -0.0016
1 5 17 0.4515 -0.0088
1 5 18 -1.4878 0.0012
1 5 19 -1.6770 0.0022
1 5 20 1.3870 -0.0055
1 5 21 4.2005 -0.0052
1 5 22 3.0120 -0.0040
1 5 23 -0.1499 -0.0097
1 5 24 -1.2583 -0.0118
1 6 0 3.2853 -0.0096
1 6 1 2.1180 -0.0131
1 6 2 -0.7681 -0.0195
1 6 3 -2.9453 0.0164
1 6 4 -1.9253 0.0444
1 6 5 1.4521 0.0182
1 6 6 4.2858 -0.0087
1 6 7 4.2229 0.0044
1 6 8 1.3767 0.0115
1 6 9 -1.3047 -0.0094
1 6 10 -1.2175 -0.0152
1 6 11 0.7776 0.0008
1 6 12 2.1963 0.0013
1 6 13 1.9950 -0.0092
1 6 14 0.6223 -0.0039
1 6 15 -0.6196 0.0041
1 6 16 -0.6885 -0.0006
1 6 17 -0.7945 -0.0032
1 6 18 -2.2362 -0.0005
1 6 19 -2.3557 -0.0042
1 6 20 1.4065 -0.0055
1 6 21 5.1446 0.0039
1 6 22 3.9087 0.0068
1 6 23 0.1815 -0.0035
1 6 24 -0.8991 -0.0083
1 7 0 2.9868 -0.1802
1 7 1 3.7347 -0.1500
1 7 2 3.1316 -0.0677
1 7 3 1.5154 0.0184
1 7 4 0.7309 0.0518
1 7 5 2.6597 0.0188
1 7 6 6.1736 -0.0193
1 7 7 6.4871 -0.0121
1 7 8 1.8819 0.0069
1 7 9 -2.5197 -0.0015
1 7 10 -2.3955 -0.0111
1 7 11 0.2273 0.0024
1 7 12 2.3547 0.0127
1 7 13 3.4922 0.0026
1 7 14 2.7983 -0.0076
1 7 15 0.1579 -0.0052
1 7 16 -1.9191 0.0002
1 7 17 -2.6932 0.0004
1 7 18 -3.8771 -0.0050
1 7 19 -3.8254 -0.0099
1 7 20 0.1082 -0.0042
1 7 21 4.1489 0.0055
1 7 22 3.1694 0.0022
1 7 23 -0.1634 -0.0088
1 7 24 -0.6326 -0.0078
1 8 0 1.5394 -0.2076
1 8 1 2.9406 -0.1496
1 8 2 3.0861 -0.0454
1 8 3 1.6520 0.0130
1 8 4 -0.1918 0.0217
1 8 5 0.7847 0.0071
1 8 6 4.6340 -0.0119
1 8 7 5.2327 -0.0139
1 8 8 -0.0596 -0.0008
1 8 9 -4.6805 0.0014
1 8 10 -3.7376 -0.0062
1 8 11 -0.5555 0.0011
1 8 12 1.8554 0.0168
1 8 13 3.9982 0.0138
1 8 14 4.1135 -0.0025
1 8 15 0.7464 -0.0064
1 8 16 -2.3939 0.0008
1 8 17 -2.8016 0.0001
1 8 18 -2.9462 -0.0086
1 8 19 -3.0822 -0.0087
1 8 20 -0.7340 0.0009
1 8 21 1.8346 0.0027
1 8 22 0.7145 -0.0086
1 8 23 -1.6677 -0.0151
1 9 0 -0.2310 -0.0971
1 9 1 2.0024 -0.0357
1 9 2 3.3414 0.0220
1 9 3 2.5366 0.0050
1 9 4 -0.2937 -0.0194
1 9 5 -1.0863 -0.0032
1 9 6 1.7902 0.0067
1 9 7 2.4293 -0.0085
1 9 8 -2.1129 -0.0101
1 9 9 -5.1670 0.0037
1 9 10 -2.5819 0.0030
1 9 11 0.8964 -0.0022
1 9 12 2.2380 0.0076
1 9 13 3.1694 0.0134
1 9 14 2.5178 0.0019
1 9 15 -1.0466 -0.0054
1 9 16 -3.1255 -0.0009
1 9 17 -1.0161 -0.0015
1 9 18 1.1953 -0.0056
1 9 19 1.1477 0.0008
1 9 20 1.2536 0.0079
1 9 21 1.4096 -0.0006
1 9 22 -0.5337 -0.0125
1 9 23 -2.6089 -0.0090
1 10 0 -2.8360 0.0502
1 10 1 0.3018 0.0807
1 10 2 3.1982 0.0690
1 10 3 3.5268 -0.0036
1 10 4 0.4442 -0.0408
1 10 5 -1.7257 -0.0040
1 10 6 -0.0944 0.0198
1 10 7 0.5949 -0.0074
1 10 8 -2.3533 -0.0184
1 10 9 -3.1748 0.0074
1 10 10 0.8223 0.0149
1 10 11 3.9817 -0.0030
1 10 12 3.4712 -0.0047
1 10 13 2.1839 0.0065
1 10 14 0.4833 0.0033
1 10 15 -2.2663 -0.0050
1 10 16 -2.5009 -0.0042
1 10 17 1.1871 -0.0026
1 10 18 4.1507 -0.0001
1 10 19 3.9838 0.0082
1 10 20 3.3943 0.0077
1 10 21 3.1116 -0.0058
1 10 22 1.2991 -0.0101
1 11 0 -4.5081 0.1310
1 11 1 -2.0160 0.1110
1 11 2 0.9023 0.0581
1 11 3 2.0161 -0.0089
1 11 4 -0.0842 -0.0320
1 11 5 -2.1881 0.0014
1 11 6 -1.4641 0.0199
1 11 7 -0.9502 -0.0062
1 11 8 -2.3699 -0.0161
1 11 9 -1.5364 0.0110
1 11 10 2.4939 0.0197
1 11 11 4.3701 -0.0025
1 11 12 2.3543 -0.0097
1 11 13 0.2901 0.0037
1 11 14 -0.2357 0.0069
1 11 15 -0.0675 0.0002
1 11 16 1.4785 -0.0011
1 11 17 3.7274 0.0003
1 11 18 3.7735 0.0026
1 11 19 2.0546 0.0047
1 11 20 1.9111 -0.0034
1 11 21 3.2345 -0.0129
1 12 0 -2.7239 0.1087
1 12 1 -3.0038 0.0513
1 12 2 -2.1199 0.0060
1 12 3 -0.4864 -0.0067
1 12 4 -0.1509 -0.0069
1 12 5 -0.8869 0.0008
1 12 6 -1.2849 0.0077
1 12 7 -2.0997 0.0025
1 12 8 -3.2033 0.0012
1 12 9 -2.1054 0.0125
1 12 10 0.6768 0.0126
1 12 11 1.3384 -0.0024
1 12 12 -0.5314 -0.0058
1 12 13 -1.5191 0.0045
1 12 14 0.0308 0.0086
1 12 15 2.9718 0.0068
1 12 16 5.4053 0.0074
1 12 17 5.2456 0.0062
1 12 18 2.2535 0.0022
1 12 19 -0.4013 -0.0043
1 12 20 -0.0921 -0.0155
1 13 0 0.8985 0.0258
1 13 1 -2.5885 -0.0346
1 13 2 -4.0931 -0.0410
1 13 3 -1.7409 0.0045
1 13 4 1.4792 0.0168
1 13 5 2.3552 -0.0084
1 13 6 0.7598 -0.0106
1 13 7 -1.7461 0.0121
1 13 8 -3.3923 0.0193
1 13 9 -3.2881 0.0077
1 13 10 -2.2210 -0.0007
1 13 11 -1.2448 0.0004
1 13 12 -0.3158 0.0034
1 13 13 0.8945 0.0022
1 13 14 2.5047 -0.0005
1 13 15 4.3213 0.0027
1 13 16 4.8705 0.0072
1 13 17 2.8514 0.0037
1 13 18 0.2490 -0.0035
1 14 0 2.1546 -0.0428
1 14 1 -2.3501 -0.0776
1 14 2 -4.2933 -0.0519
1 14 3 -1.3367 0.0180
1 14 4 2.6733 0.0308
1 14 5 3.3387 -0.0135
1 14 6 0.7874 -0.0225
1 14 7 -1.7707 0.0127
1 14 8 -2.7558 0.0211
1 14 9 -3.4310 -0.0050
1 14 10 -3.9272 -0.0124
1 14 11 -1.8482 0.0062
1 14 12 2.8203 0.0131
1 14 13 6.2659 -0.0020
1 14 14 6.5502 -0.0132
1 14 15 5.1210 -0.0081
1 14 16 2.4137 -0.0037
1 15 2 -2.4771 -0.0310
1 15 3 0.7941 0.0192
1 15 4 2.8221 0.0302
1 15 5 0.9238 -0.0073
1 15 6 -2.5977 -0.0210
1 15 7 -3.6733 0.0049
1 15 8 -2.3455 0.0092
1 15 9 -2.3764 -0.0164
1 15 10 -3.7353 -0.0185
1 15 11 -1.8148 0.0073
1 15 12 3.5257 0.0158
1 15 13 6.7652 -0.0012
2 -14 0 2.6299 0.1012
2 -14 1 2.8780 0.1084
2 -14 2 2.8012 0.0182
2 -14 3 1.9178 -0.0495
2 -13 0 2.6145 0.0951
2 -13 1 4.4228 0.1331
2 -13 2 3.9288 0.0546
2 -13 3 0.7043 -0.0333
2 -13 4 0.5617 -0.0441
2 -13 5 4.1934 -0.0192
2 -13 6 3.9064 -0.0083
2 -12 0 -0.0639 0.0047
2 -12 1 3.2991 0.0545
2 -12 2 3.8466 0.0463
2 -12 3 -0.2638 0.0027
2 -12 4 -2.8734 -0.0123
2 -12 5 -1.3562 -0.0077
2 -12 6 -1.2609 -0.0144
2 -12 7 -4.6038 -0.0128
2 -12 8 -5.8287 0.0043
2 -12 9 -2.5881 0.0049
2 -11 0 -3.3381 -0.1246
2 -11 1 0.4420 -0.0819
2 -11 2 3.0849 0.0005
2 -11 3 0.7598 0.0306
2 -11 4 -2.4438 0.0214
2 -11 5 -3.1890 0.0109
2 -11 6 -3.9652 -0.0007
2 -11 7 -5.4681 -0.0054
2 -11 8 -4.5192 0.0057
2 -11 9 -1.2331 0.0087
2 -11 10 0.8712 -0.0040
2 -11 11 0.9975 -0.0027
2 -10 0 -4.2709 -0.1962
2 -10 1 -1.8761 -0.1665
2 -10 2 1.2620 -0.0307
2 -10 3 1.1380 0.0431
2 -10 4 -0.3915 0.0308
2 -10 5 -0.9019 0.0135
2 -10 6 -1.4981 0.0116
2 -10 7 -2.3532 0.0053
2 -10 8 -1.8521 0.0023
2 -10 9 -0.6026 0.0042
2 -10 10 -0.1335 -0.0033
2 -10 11 0.1372 -0.0079
2 -10 12 0.6726 0.0058
2 -10 13 0.4873 0.0155
2 -9 0 -1.5737 -0.1431
2 -9 1 -1.5550 -0.1292
2 -9 2 -0.7117 -0.0182
2 -9 3 -0.6297 0.0376
2 -9 4 -0.1549 0.0137
2 -9 5 1.3890 0.0005
2 -9 6 2.2861 0.0135
2 -9 7 1.8023 0.0073
2 -9 8 0.8204 -0.0075
2 -9 9 -0.3247 -0.0017
2 -9 10 -1.1179 0.0037
2 -9 11 -0.5328 -0.0067
2 -9 12 0.6734 -0.0070
2 -9 13 0.7419 0.0059
2 -9 14 0.0620 0.0021
2 -8 0 1.9827 0.0207
2 -8 1 -0.0817 0.0057
2 -8 2 -2.1497 0.0147
2 -8 3 -2.6440 0.0060
2 -8 4 -0.6045 -0.0200
2 -8 5 2.4943 -0.0150
2 -8 6 3.9211 0.0099
2 -8 7 2.9452 0.0046
2 -8 8 0.8538 -0.0146
2 -8 9 -0.9759 -0.0036
2 -8 10 -1.5074 0.0147
2 -8 11 -0.5519 0.0026
2 -8 12 0.5404 -0.0131
2 -8 13 0.5138 -0.0036
2 -8 14 -0.0274 0.0014
2 -8 15 -0.0015 -0.0104
2 -8 16 0.2865 -0.0021
2 -7 0 2.8627 0.2004
2 -7 1 -0.7439 0.1462
2 -7 2 -3.9715 0.0335
2 -7 3 -3.5621 -0.0372
2 -7 4 0.1787 -0.0463
2 -7 5 3.4976 -0.0204
2 -7 6 3.5733 0.0059
2 -7 7 1.0805 0.0047
2 -7 8 -1.4921 -0.0099
2 -7 9 -2.3324 -0.0019
2 -7 10 -1.3700 0.0165
2 -7 11 0.0100 0.0068
2 -7 12 0.4989 -0.0139
2 -7 13 0.0940 -0.0068
2 -7 14 -0.4471 0.0070
2 -7 15 -0.6021 -0.0018
2 -7 16 -0.3374 -0.0042
2 -7 17 -0.0571 0.0138
2 -6 0 0.7517 0.2670
2 -6 1 -3.1134 0.1931
2 -6 2 -5.1963 0.0253
2 -6 3 -2.8163 -0.0544
2 -6 4 1.9311 -0.0360
2 -6 5 4.2014 -0.0080
2 -6 6 2.3558 0.0028
2 -6 7 -1.2939 0.0086
2 -6 8 -3.6913 0.0057
2 -6 9 -3.2616 0.0014
2 -6 10 -0.9636 0.0055
2 -6 11 0.7253 0.0005
2 -6 12 0.8362 -0.0149
2 -6 13 0.3144 -0.0099
2 -6 14 -0.3043 0.0105
2 -6 15 -0.9219 0.0099
2 -6 16 -0.8529 -0.0024
2 -6 17 -0.1414 0.0012
2 -5 0 -4.5506 0.1538
2 -5 1 -5.1848 0.1064
2 -5 2 -3.6094 -0.0051
2 -5 3 0.3010 -0.0299
2 -5 4 3.9789 0.0094
2 -5 5 4.1882 0.0145
2 -5 6 1.3621 -0.0017
2 -5 7 -1.9133 0.0094
2 -5 8 -3.6692 0.0188
2 -5 9 -2.8511 0.0021
2 -5 10 -0.3673 -0.0078
2 -5 11 1.2814 -0.0041
2 -5 12 1.3570 -0.0112
2 -5 13 0.9836 -0.0147
2 -5 14 0.2954 0.0037
2 -5 15 -0.6902 0.0152
2 -5 16 -0.6652 0.0041
2 -5 17 0.3637 -0.0046
2 -5 18 0.6926 -0.0048
2 -5 19 0.3226 -0.0073
2 -4 0 -14.1700 -0.0669
2 -4 1 -7.7586 -0.0545
2 -4 2 -0.6334 -0.0420
2 -4 3 3.6649 0.0083
2 -4 4 4.4496 0.0491
2 -4 5 2.7469 0.0262
2 -4 6 0.9100 -0.0085
2 -4 7 -0.2085 0.0020
2 -4 8 -1.0243 0.0146
2 -4 9 -0.7415 -0.0063
2 -4 10 0.8692 -0.0161
2 -4 11 2.0017 0.0014
2 -4 12 1.8675 0.0020
2 -4 13 1.3027 -0.0145
2 -4 14 0.3459 -0.0082
2 -4 15 -0.6756 0.0105
2 -4 16 -0.2414 0.0091
2 -4 17 1.1954 -0.0023
2 -4 18 1.4242 -0.0058
2 -4 19 0.6520 -0.0063
2 -4 20 0.5607 -0.0049
2 -3 0 -23.3980 -0.2279
2 -3 1 -9.3792 -0.1683
2 -3 2 2.0988 -0.0600
2 -3 3 4.3055 0.0233
2 -3 4 0.7946 0.0439
2 -3 5 -1.8882 0.0137
2 -3 6 -0.7889 -0.0128
2 -3 7 1.5359 -0.0065
2 -3 8 2.0825 -0.0020
2 -3 9 1.8893 -0.0191
2 -3 10 2.6101 -0.0188
2 -3 11 3.1846 0.0085
2 -3 12 2.6070 0.0155
2 -3 13 1.3965 -0.0059
2 -3 14 -0.0627 -0.0125
2 -3 15 -0.9415 0.0018
2 -3 16 -0.0214 0.0065
2 -3 17 1.5599 -0.0009
2 -3 18 1.5556 -0.0049
2 -3 19 0.5392 -0.0037
2 -3 20 0.2937 0.0010
2 -3 21 0.4146 0.0061
2 -2 0 -22.3735 -0.2128
2 -2 1 -3.2304 -0.1549
2 -2 2 8.2958 -0.0388
2 -2 3 4.4149 0.0142
2 -2 4 -5.1325 0.0023
2 -2 5 -8.5306 -0.0132
2 -2 6 -4.1990 -0.0121
2 -2 7 1.0391 -0.0087
2 -2 8 2.5071 -0.0128
2 -2 9 2.1685 -0.0185
2 -2 10 2.7956 -0.0111
2 -2 11 3.6694 0.0083
2 -2 12 3.3447 0.0161
2 -2 13 1.8775 0.0054
2 -2 14 0.1047 -0.0040
2 -2 15 -0.5896 -0.0029
2 -2 16 0.4677 -0.0006
2 -2 17 1.5639 -0.0017
2 -2 18 1.0171 -0.0040
2 -2 19 -0.0817 -0.0045
2 -2 20 -0.3001 0.0018
2 -2 21 -0.1214 0.0092
2 -2 22 0.0342 0.0072
2 -1 0 -8.7301 -0.0607
2 -1 1 12.9029 -0.0467
2 -1 2 20.3512 0.0130
2 -1 3 7.5777 0.0129
2 -1 4 -8.4868 -0.0243
2 -1 5 -12.2783 -0.0263
2 -1 6 -5.6991 -0.0086
2 -1 7 0.0976 -0.0100
2 -1 8 0.4012 -0.0124
2 -1 9 -0.9064 0.0008
2 -1 10 -0.1512 0.0086
2 -1 11 1.8820 0.0033
2 -1 12 2.9515 0.0034
2 -1 13 2.1826 0.0106
2 -1 14 0.6385 0.0077
2 -1 15 0.3178 -0.0049
2 -1 16 1.3777 -0.0085
2 -1 17 1.6755 -0.0006
2 -1 18 0.4661 0.0018
2 -1 19 -0.5151 -0.0030
2 -1 20 -0.5067 -0.0008
2 -1 21 -0.3915 0.0042
2 -1 22 -0.1534 -0.0008
2 0 0 7.6983 0.0827
2 0 1 29.9781 0.0478
2 0 2 31.7771 0.0522
2 0 3 11.0467 0.0309
2 0 4 -8.8659 -0.0055
2 0 5 -11.2154 -0.0085
2 0 6 -2.8762 -0.0021
2 0 7 1.5303 -0.0139
2 0 8 -1.0558 -0.0088
2 0 9 -4.2233 0.0219
2 0 10 -3.7795 0.0275
2 0 11 -0.9023 -0.0010
2 0 12 1.3528 -0.0122
2 0 13 1.2161 0.0063
2 0 14 0.0428 0.0111
2 0 15 0.4968 -0.0086
2 0 16 2.0620 -0.0158
2 0 17 1.8790 -0.0005
2 0 18 0.0623 0.0071
2 0 19 -0.7765 0.0004
2 0 20 -0.3903 -0.0003
2 0 21 -0.3204 0.0027
2 0 22 -0.4188 -0.0047
2 0 23 0.0588 -0.0102
2 1 0 15.8089 0.1174
2 1 1 36.7770 0.0610
2 1 2 33.8211 0.0414
2 1 3 9.5625 0.0349
2 1 4 -9.3597 0.0234
2 1 5 -8.0999 0.0170
2 1 6 1.7130 0.0051
2 1 7 4.2700 -0.0133
2 1 8 -0.5657 -0.0045
2 1 9 -4.4596 0.0282
2 1 10 -3.9002 0.0317
2 1 11 -0.9911 -0.0022
2 1 12 0.8395 -0.0200
2 1 13 -0.1681 -0.0036
2 1 14 -1.7584 0.0058
2 1 15 -0.5119 -0.0089
2 1 16 2.1598 -0.0150
2 1 17 2.1542 -0.0010
2 1 18 -0.1407 0.0058
2 1 19 -1.1740 -0.0012
2 1 20 -0.5756 -0.0012
2 1 21 -0.3665 0.0037
2 1 22 -0.7023 -0.0004
2 1 23 -0.6463 -0.0030
2 2 0 13.3466 0.0743
2 2 1 30.5643 0.0329
2 2 2 25.0677 -0.0002
2 2 3 2.9852 -0.0012
2 2 4 -10.5358 0.0100
2 2 5 -5.1336 0.0130
2 2 6 4.9724 0.0040
2 2 7 5.8755 -0.0050
2 2 8 0.6776 0.0015
2 2 9 -1.9170 0.0178
2 2 10 -0.2306 0.0196
2 2 11 2.5353 0.0008
2 2 12 3.1027 -0.0151
2 2 13 0.3579 -0.0111
2 2 14 -2.4751 -0.0007
2 2 15 -1.3305 0.0000
2 2 16 1.9528 -0.0014
2 2 17 2.3560 0.0035
2 2 18 -0.0940 0.0049
2 2 19 -1.4622 -0.0010
2 2 20 -0.8011 -0.0031
2 2 21 -0.1713 -0.0013
2 2 22 -0.4049 -0.0017
2 2 23 -0.7144 0.0031
2 2 24 -0.5309 0.0117
2 3 0 5.8894 0.0405
2 3 1 17.2530 0.0387
2 3 2 11.2834 -0.0184
2 3 3 -4.7516 -0.0508
2 3 4 -11.3529 -0.0372
2 3 5 -3.2947 -0.0156
2 3 6 5.8360 -0.0034
2 3 7 6.0083 0.0058
2 3 8 2.0215 0.0064
2 3 9 1.1246 -0.0020
2 3 10 3.4362 -0.0024
2 3 11 5.8292 0.0038
2 3 12 5.8138 -0.0017
2 3 13 2.6232 -0.0108
2 3 14 -0.7762 -0.0025
2 3 15 -0.5246 0.0124
2 3 16 2.0038 0.0129
2 3 17 2.2384 0.0067
2 3 18 -0.2698 0.0073
2 3 19 -1.9535 0.0083
2 3 20 -1.0898 0.0020
2 3 21 0.6061 -0.0076
2 3 22 1.0746 -0.0119
2 3 23 0.3047 -0.0038
2 3 24 -0.2084 0.0104
2 4 0 0.3829 0.0399
2 4 1 5.7033 0.0780
2 4 2 0.5214 0.0009
2 4 3 -9.2547 -0.0695
2 4 4 -11.2717 -0.0630
2 4 5 -3.6206 -0.0276
2 4 6 3.8364 -0.0025
2 4 7 4.9404 0.0147
2 4 8 3.2603 0.0099
2 4 9 3.0753 -0.0171
2 4 10 4.2386 -0.0233
2 4 11 5.3400 0.0000
2 4 12 5.2446 0.0080
2 4 13 3.2590 -0.0050
2 4 14 0.9827 0.0003
2 4 15 0.9367 0.0189
2 4 16 2.4590 0.0149
2 4 17 2.3633 -0.0003
2 4 18 -0.3279 0.0040
2 4 19 -2.8774 0.0152
2 4 20 -2.2742 0.0086
2 4 21 0.8341 -0.0077
2 4 22 2.7662 -0.0159
2 4 23 1.7992 -0.0126
2 4 24 0.1970 -0.0034
2 5 0 -0.2374 0.0280
2 5 1 1.3033 0.0835
2 5 2 -2.1693 0.0200
2 5 3 -7.6053 -0.0474
2 5 4 -8.7122 -0.0389
2 5 5 -4.3500 -0.0070
2 5 6 0.8530 0.0052
2 5 7 3.4980 0.0149
2 5 8 3.9520 0.0133
2 5 9 3.4302 -0.0148
2 5 10 2.7015 -0.0300
2 5 11 2.2714 -0.0083
2 5 12 1.8608 0.0080
2 5 13 1.0363 0.0002
2 5 14 0.3791 0.0027
2 5 15 0.8085 0.0162
2 5 16 2.1663 0.0082
2 5 17 2.7358 -0.0089
2 5 18 0.6295 -0.0038
2 5 19 -2.8961 0.0091
2 5 20 -3.4301 0.0049
2 5 21 0.2749 -0.0045
2 5 22 3.4712 -0.0059
2 5 23 2.5895 -0.0072
2 5 24 0.2463 -0.0102
2 6 0 1.8329 -0.0206
2 6 1 2.3599 0.0238
2 6 2 0.9222 0.0140
2 6 3 -1.8925 -0.0029
2 6 4 -3.5476 0.0129
2 6 5 -2.5894 0.0211
2 6 6 0.5578 0.0035
2 6 7 3.8225 -0.0001
2 6 8 4.5343 0.0111
2 6 9 2.5275 -0.0000
2 6 10 0.4706 -0.0195
2 6 11 -0.2264 -0.0122
2 6 12 -0.4655 0.0042
2 6 13 -0.5727 0.0041
2 6 14 -0.3405 0.0021
2 6 15 -0.2182 0.0064
2 6 16 0.2618 0.0014
2 6 17 1.5001 -0.0077
2 6 18 1.1498 -0.0056
2 6 19 -1.7775 -0.0020
2 6 20 -2.8697 -0.0052
2 6 21 0.6276 -0.0018
2 6 22 3.9396 0.0073
2 6 23 2.7355 0.0049
2 6 24 -0.0238 -0.0040
2 7 0 3.0067 -0.0743
2 7 1 3.7567 -0.0547
2 7 2 3.4572 0.0003
2 7 3 1.9606 0.0407
2 7 4 0.2796 0.0520
2 7 5 -0.1106 0.0303
2 7 6 2.3256 -0.0072
2 7 7 5.6173 -0.0185
2 7 8 5.0693 0.0013
2 7 9 0.8184 0.0101
2 7 10 -1.9973 -0.0044
2 7 11 -1.6754 -0.0095
2 7 12 -0.5620 0.0034
2 7 13 0.7131 0.0098
2 7 14 1.8221 0.0024
2 7 15 0.6834 -0.0043
2 7 16 -1.6216 -0.0043
2 7 17 -1.5545 -0.0023
2 7 18 -0.4156 -0.0037
2 7 19 -1.3696 -0.0094
2 7 20 -1.7181 -0.0103
2 7 21 1.5810 0.0003
2 7 22 4.4302 0.0095
2 7 23 2.8115 0.0047
2 7 24 -0.1274 -0.0008
2 8 0 2.0691 -0.0884
2 8 1 3.2018 -0.0892
2 8 2 3.1289 -0.0001
2 8 3 2.0091 0.0600
2 8 4 0.4511 0.0504
2 8 5 -0.2905 0.0163
2 8 6 2.1406 -0.0097
2 8 7 5.6414 -0.0192
2 8 8 4.2524 -0.0076
2 8 9 -1.4127 0.0080
2 8 10 -4.3576 0.0047
2 8 11 -2.8287 -0.0045
2 8 12 -0.4083 0.0033
2 8 13 2.0854 0.0143
2 8 14 4.0814 0.0060
2 8 15 2.2019 -0.0090
2 8 16 -2.3018 -0.0093
2 8 17 -3.4709 -0.0028
2 8 18 -1.3613 -0.0061
2 8 19 -0.8194 -0.0126
2 8 20 -1.1072 -0.0084
2 8 21 1.0422 0.0002
2 8 22 3.1149 -0.0009
2 8 23 1.8763 -0.0077
2 9 0 -0.3187 -0.0517
2 9 1 1.4477 -0.0636
2 9 2 2.0041 0.0082
2 9 3 1.2898 0.0423
2 9 4 -0.4792 0.0110
2 9 5 -1.9735 -0.0085
2 9 6 0.0242 0.0015
2 9 7 3.7110 -0.0013
2 9 8 2.5549 -0.0108
2 9 9 -2.7980 -0.0006
2 9 10 -4.8126 0.0089
2 9 11 -2.2839 0.0010
2 9 12 0.0466 0.0002
2 9 13 1.4282 0.0118
2 9 14 2.4069 0.0087
2 9 15 0.3032 -0.0078
2 9 16 -3.5300 -0.0120
2 9 17 -3.1273 -0.0072
2 9 18 0.9465 -0.0092
2 9 19 2.4018 -0.0093
2 9 20 0.7989 -0.0016
2 9 21 0.2396 -0.0024
2 9 22 0.5545 -0.0136
2 9 23 -0.3069 -0.0144
2 10 0 -3.3397 0.0121
2 10 1 -0.8484 -0.0090
2 10 2 0.8616 0.0085
2 10 3 0.7831 0.0017
2 10 4 -1.1005 -0.0317
2 10 5 -2.9575 -0.0238
2 10 6 -1.1248 0.0157
2 10 7 2.7214 0.0158
2 10 8 2.2023 -0.0123
2 10 9 -1.9428 -0.0092
2 10 10 -2.5729 0.0109
2 10 11 0.6203 0.0065
2 10 12 1.9759 -0.0037
2 10 13 0.7971 0.0043
2 10 14 -0.6026 0.0078
2 10 15 -2.8029 -0.0042
2 10 16 -4.5347 -0.0109
2 10 17 -1.8372 -0.0089
2 10 18 3.5031 -0.0073
2 10 19 5.3481 -0.0001
2 10 20 3.2588 0.0074
2 10 21 1.3135 -0.0028
2 10 22 0.2567 -0.0163
2 11 0 -5.3156 0.0650
2 11 1 -3.0045 0.0332
2 11 2 -1.1651 -0.0051
2 11 3 -1.2170 -0.0324
2 11 4 -2.6980 -0.0446
2 11 5 -3.5361 -0.0196
2 11 6 -1.0558 0.0206
2 11 7 2.6870 0.0192
2 11 8 2.4922 -0.0120
2 11 9 -0.5347 -0.0135
2 11 10 -0.5399 0.0085
2 11 11 2.1806 0.0087
2 11 12 2.6136 -0.0036
2 11 13 0.5933 0.0002
2 11 14 -0.7655 0.0065
2 11 15 -1.1411 0.0008
2 11 16 -0.7392 -0.0044
2 11 17 1.3912 -0.0049
2 11 18 3.6064 -0.0038
2 11 19 3.2741 0.0044
2 11 20 1.8034 0.0101
2 11 21 1.7410 -0.0007
2 12 0 -3.5231 0.0767
2 12 1 -3.2666 0.0412
2 12 2 -3.3877 -0.0223
2 12 3 -3.9696 -0.0397
2 12 4 -3.9145 -0.0241
2 12 5 -2.5941 -0.0063
2 12 6 -0.0175 0.0088
2 12 7 1.8730 0.0091
2 12 8 0.8993 -0.0069
2 12 9 -1.2701 -0.0120
2 12 10 -1.4338 0.0003
2 12 11 -0.3653 0.0059
2 12 12 -0.5932 0.0019
2 12 13 -1.1871 0.0024
2 12 14 0.2527 0.0048
2 12 15 3.4141 0.0044
2 12 16 6.1183 0.0055
2 12 17 6.3831 0.0033
2 12 18 3.3374 -0.0033
2 12 19 -0.9966 -0.0029
2 12 20 -2.6011 0.0005
2 13 0 2.1976 0.0464
2 13 1 -0.8495 0.0229
2 13 2 -4.1386 -0.0263
2 13 3 -4.8509 -0.0178
2 13 4 -2.0163 0.0124
2 13 5 1.6428 0.0051
2 13 6 2.7730 -0.0127
2 13 7 0.8232 -0.0071
2 13 8 -1.8712 -0.0009
2 13 9 -3.1093 -0.0092
2 13 10 -3.1679 -0.0106
2 13 11 -3.2491 0.0018
2 13 12 -3.0662 0.0102
2 13 13 -1.6947 0.0052
2 13 14 0.8949 -0.0038
2 13 15 4.2898 -0.0020
2 13 16 7.2698 0.0084
2 13 17 7.1354 0.0082
2 13 18 2.8066 -0.0053
2 14 0 7.0224 0.0034
2 14 1 1.9937 0.0016
2 14 2 -3.1144 -0.0126
2 14 3 -3.1434 0.0147
2 14 4 1.8480 0.0432
2 14 5 6.1933 0.0161
2 14 6 4.8919 -0.0224
2 14 7 -0.3548 -0.0160
2 14 8 -3.6331 0.0019
2 14 9 -3.2478 -0.0080
2 14 10 -2.5513 -0.0170
2 14 11 -2.3073 0.0009
2 14 12 0.0535 0.0170
2 14 13 3.4518 0.0041
2 14 14 4.0602 -0.0181
2 14 15 2.4273 -0.0181
2 14 16 1.6941 -0.0013
2 15 3 -0.1715 0.0252
2 15 4 4.5524 0.0440
2 15 5 6.7196 0.0227
2 15 6 2.8935 -0.0119
2 15 7 -3.0192 -0.0116
2 15 8 -4.3786 0.0034
2 15 9 -1.6292 -0.0041
2 15 10 -0.2889 -0.0128
2 15 11 0.2225 0.0036
2 15 12 4.4782 0.0188
3 -14 0 0.2229 -0.0329
3 -14 1 -0.5906 0.0352
3 -14 2 0.8776 0.0245
3 -14 3 1.5562 -0.0211
3 -13 0 0.4861 -0.0557
3 -13 1 0.2353 0.0277
3 -13 2 1.9322 0.0394
3 -13 3 1.7843 -0.0174
3 -13 4 0.3357 -0.0395
3 -13 5 1.0009 -0.0097
3 -13 6 1.9820 0.0102
3 -12 0 -2.1768 -0.0570
3 -12 1 -0.7924 -0.0072
3 -12 2 1.9675 0.0315
3 -12 3 1.3160 0.0088
3 -12 4 -1.5826 -0.0199
3 -12 5 -1.8354 -0.0111
3 -12 6 -0.3229 0.0004
3 -12 7 -1.1607 -0.0060
3 -12 8 -2.9106 -0.0070
3 -12 9 -1.7349 -0.0037
3 -11 0 -5.5379 -0.0438
3 -11 1 -2.6263 -0.0627
3 -11 2 2.3097 -0.0025
3 -11 3 3.1046 0.0379
3 -11 4 -0.2516 0.0211
3 -11 5 -2.5978 0.0003
3 -11 6 -2.7002 -0.0027
3 -11 7 -2.7666 -0.0052
3 -11 8 -2.2931 -0.0034
3 -11 9 -0.1043 0.0042
3 -11 10 1.7246 0.0003
3 -11 11 1.3639 -0.0088
3 -10 0 -6.0572 -0.0176
3 -10 1 -3.2865 -0.0946
3 -10 2 2.4573 -0.0308
3 -10 3 5.1207 0.0564
3 -10 4 3.2424 0.0512
3 -10 5 0.5944 0.0054
3 -10 6 -0.7009 -0.0059
3 -10 7 -1.1611 0.0017
3 -10 8 -0.6661 0.0026
3 -10 9 0.5611 0.0052
3 -10 10 0.9441 0.0064
3 -10 11 0.2123 -0.0018
3 -10 12 -0.3607 -0.0036
3 -10 13 -0.5126 0.0073
3 -9 0 -2.7774 0.0163
3 -9 1 -1.6450 -0.0683
3 -9 2 1.4284 -0.0260
3 -9 3 3.2473 0.0571
3 -9 4 2.9442 0.0522
3 -9 5 2.4565 -0.0009
3 -9 6 2.5805 -0.0111
3 -9 7 2.5347 0.0045
3 -9 8 2.0013 0.0012
3 -9 9 0.9993 -0.0030
3 -9 10 -0.2897 0.0073
3 -9 11 -0.9490 0.0087
3 -9 12 -0.6299 0.0005
3 -9 13 -0.3575 0.0038
3 -9 14 -0.5217 0.0064
3 -9 15 -0.2327 -0.0086
3 -8 0 1.9300 0.0494
3 -8 1 1.4472 0.0046
3 -8 2 0.0804 -0.0026
3 -8 3 -1.2803 0.0246
3 -8 4 -1.2761 0.0187
3 -8 5 0.5777 -0.0109
3 -8 6 2.8235 -0.0096
3 -8 7 3.5568 0.0062
3 -8 8 2.3056 -0.0025
3 -8 9 0.0786 -0.0115
3 -8 10 -1.4952 0.0050
3 -8 11 -1.4600 0.0154
3 -8 12 -0.5757 0.0027
3 -8 13 -0.1959 -0.0037
3 -8 14 -0.3049 0.0006
3 -8 15 -0.0241 -0.0078
3 -8 16 0.5640 -0.0123
3 -7 0 4.8630 0.0732
3 -7 1 3.2027 0.0801
3 -7 2 -1.0755 0.0098
3 -7 3 -4.3535 -0.0383
3 -7 4 -3.9467 -0.0357
3 -7 5 -0.8807 -0.0177
3 -7 6 1.7446 -0.0001
3 -7 7 1.9341 0.0097
3 -7 8 0.0114 -0.0004
3 -7 9 -2.0279 -0.0113
3 -7 10 -2.3639 0.0009
3 -7 11 -1.2473 0.0131
3 -7 12 -0.3432 0.0015
3 -7 13 -0.2956 -0.0097
3 -7 14 -0.4125 -0.0043
3 -7 15 -0.2288 -0.0039
3 -7 16 0.1193 -0.0060
3 -7 17 0.3684 0.0096
3 -6 0 4.3884 0.0695
3 -6 1 1.6961 0.1123
3 -6 2 -2.6233 0.0058
3 -6 3 -4.8118 -0.0889
3 -6 4 -2.9429 -0.0713
3 -6 5 0.4655 -0.0138
3 -6 6 2.0363 0.0100
3 -6 7 0.8815 0.0118
3 -6 8 -1.6109 0.0075
3 -6 9 -3.0114 -0.0035
3 -6 10 -2.0246 -0.0066
3 -6 11 -0.2190 0.0007
3 -6 12 0.3293 -0.0012
3 -6 13 -0.0502 -0.0083
3 -6 14 -0.2958 -0.0041
3 -6 15 -0.5582 -0.0006
3 -6 16 -0.7492 -0.0044
3 -6 17 -0.3198 0.0023
3 -6 18 0.1730 0.0112
3 -5 0 -0.0332 0.0198
3 -5 1 -2.5640 0.0790
3 -5 2 -4.0796 0.0018
3 -5 3 -3.2935 -0.0789
3 -5 4 -0.1865 -0.0546
3 -5 5 2.5284 0.0021
3 -5 6 2.8587 0.0124
3 -5 7 1.1429 0.0080
3 -5 8 -1.2423 0.0151
3 -5 9 -2.2589 0.0063
3 -5 10 -0.8719 -0.0135
3 -5 11 0.9794 -0.0129
3 -5 12 1.2529 -0.0023
3 -5 13 0.7354 -0.0017
3 -5 14 0.3183 -0.0005
3 -5 15 -0.5853 0.0030
3 -5 16 -1.3582 -0.0028
3 -5 17 -0.7972 -0.0078
3 -5 18 0.0701 -0.0028
3 -5 19 0.0832 0.0015
3 -5 20 0.1622 0.0062
3 -4 0 -8.3872 -0.0591
3 -4 1 -8.4642 0.0022
3 -4 2 -4.6315 0.0118
3 -4 3 -0.3278 -0.0070
3 -4 4 2.6224 0.0043
3 -4 5 3.5047 0.0188
3 -4 6 3.0954 0.0041
3 -4 7 2.1337 -0.0028
3 -4 8 0.4502 0.0129
3 -4 9 -0.8109 0.0094
3 -4 10 -0.1072 -0.0136
3 -4 11 1.3094 -0.0141
3 -4 12 1.5636 0.0020
3 -4 13 1.1583 0.0030
3 -4 14 0.5360 -0.0016
3 -4 15 -0.8136 0.0035
3 -4 16 -1.6235 0.0036
3 -4 18 0.5564 -0.0093
3 -4 19 0.4129 -0.0070
3 -4 20 0.3152 -0.0038
3 -3 0 -18.0753 -0.1129
3 -3 1 -14.3687 -0.0659
3 -3 2 -4.3069 0.0288
3 -3 3 2.7206 0.0723
3 -3 4 3.8491 0.0564
3 -3 5 2.3110 0.0215
3 -3 6 2.1476 -0.0061
3 -3 7 3.2405 -0.0113
3 -3 8 2.7820 -0.0003
3 -3 9 0.9928 -0.0000
3 -3 10 0.4507 -0.0089
3 -3 11 1.1135 -0.0018
3 -3 12 1.3199 0.0109
3 -3 13 0.9340 0.0037
3 -3 14 -0.0020 -0.0089
3 -3 15 -1.4907 -0.0041
3 -3 16 -1.7871 0.0050
3 -3 17 -0.1104 0.0033
3 -3 18 1.1499 -0.0021
3 -3 19 0.7452 -0.0056
3 -3 20 0.4161 -0.0079
3 -3 21 0.5944 -0.0062
3 -2 0 -23.4699 -0.0954
3 -2 1 -16.2194 -0.0852
3 -2 2 -1.6666 0.0307
3 -2 3 5.3221 0.0956
3 -2 4 2.3593 0.0568
3 -2 5 -2.1234 0.0034
3 -2 6 -1.3074 -0.0085
3 -2 7 2.5606 -0.0054
3 -2 8 3.7412 -0.0100
3 -2 9 1.8995 -0.0122
3 -2 10 0.6452 -0.0029
3 -2 11 0.9583 0.0117
3 -2 12 1.3545 0.0159
3 -2 13 1.0323 0.0035
3 -2 14 -0.2421 -0.0103
3 -2 15 -1.7588 -0.0106
3 -2 16 -1.5159 -0.0025
3 -2 17 0.4170 0.0038
3 -2 18 1.2745 0.0051
3 -2 20 0.0715 -0.0037
3 -2 21 0.2181 -0.0020
3 -2 22 -0.2421 0.0021
3 -1 0 -20.5368 -0.0102
3 -1 1 -10.1969 -0.0521
3 -1 2 5.7797 0.0109
3 -1 3 9.0923 0.0537
3 -1 4 -0.1210 0.0114
3 -1 5 -7.9004 -0.0259
3 -1 6 -6.0927 -0.0075
3 -1 7 -0.1764 0.0081
3 -1 8 1.7740 -0.0069
3 -1 9 -0.1338 -0.0117
3 -1 10 -1.2788 0.0064
3 -1 11 -0.2358 0.0168
3 -1 12 1.3100 0.0098
3 -1 13 1.6782 0.0024
3 -1 14 0.3009 -0.0000
3 -1 15 -1.2799 -0.0044
3 -1 16 -0.7693 -0.0069
3 -1 17 0.9384 0.0003
3 -1 18 1.0149 0.0082
3 -1 19 -0.1545 0.0050
3 -1 20 -0.3008 -0.0009
3 -1 21 0.0799 0.0006
3 -1 22 -0.3294 0.0016
3 -1 23 -0.4058 -0.0031
3 0 0 -11.8364 0.0882
3 0 1 1.4613 0.0050
3 0 2 16.3078 -0.0111
3 0 3 13.8963 -0.0012
3 0 4 -1.4188 -0.0263
3 0 5 -11.2159 -0.0398
3 0 6 -8.1716 -0.0100
3 0 7 -1.6297 0.0103
3 0 8 -0.7360 -0.0002
3 0 9 -3.6517 0.0001
3 0 10 -4.6664 0.0163
3 0 11 -2.4988 0.0131
3 0 12 0.5444 -0.0044
3 0 13 1.8098 -0.0035
3 0 14 0.4693 0.0095
3 0 15 -1.0420 0.0069
3 0 16 -0.1840 -0.0036
3 0 17 1.2882 0.0008
3 0 18 0.5634 0.0110
3 0 19 -0.8771 0.0078
3 0 20 -0.4980 0.0006
3 0 21 0.4271 0.0012
3 0 22 0.0468 -0.0009
3 0 23 -0.4495 -0.0081
3 1 0 -4.8549 0.1307
3 1 1 10.7333 0.0461
3 1 2 23.1212 -0.0176
3 1 3 15.9169 -0.0237
3 1 4 -2.2470 -0.0213
3 1 5 -11.1830 -0.0225
3 1 6 -6.2898 -0.0113
3 1 7 -0.0065 -0.0010
3 1 8 -0.8482 0.0005
3 1 9 -4.7090 0.0090
3 1 10 -5.4540 0.0179
3 1 11 -2.7284 0.0054
3 1 12 0.4590 -0.0148
3 1 13 1.2160 -0.0118
3 1 14 -0.7193 0.0059
3 1 15 -1.9066 0.0087
3 1 16 -0.0151 0.0000
3 1 17 1.8888 0.0013
3 1 18 0.6464 0.0078
3 1 19 -1.3404 0.0044
3 1 20 -0.8942 -0.0000
3 1 21 0.4880 0.0031
3 1 22 0.3566 0.0019
3 1 23 -0.4819 -0.0043
3 1 24 -0.4462 -0.0019
3 2 0 -4.1040 0.0895
3 2 1 11.7079 0.0506
3 2 2 21.2070 -0.0114
3 2 3 12.4201 -0.0211
3 2 4 -3.8701 0.0015
3 2 5 -9.4470 0.0061
3 2 6 -3.0304 -0.0071
3 2 7 2.3749 -0.0113
3 2 8 0.6266 -0.0016
3 2 9 -2.5494 0.0079
3 2 10 -1.9871 0.0078
3 2 11 0.9674 -0.0009
3 2 12 2.7275 -0.0111
3 2 13 1.1517 -0.0131
3 2 14 -2.4521 -0.0050
3 2 15 -3.5415 0.0031
3 2 16 -0.3017 0.0036
3 2 17 2.8210 0.0008
3 2 18 1.8867 -0.0015
3 2 19 -0.6362 -0.0045
3 2 20 -0.9433 -0.0037
3 2 21 0.2303 0.0017
3 2 22 0.3903 0.0028
3 2 23 -0.4345 0.0014
3 2 24 -0.7579 0.0072
3 3 0 -6.4980 -0.0007
3 3 1 6.4856 0.0300
3 3 2 12.8770 -0.0019
3 3 3 5.6400 -0.0220
3 3 4 -5.4404 0.0022
3 3 5 -7.1450 0.0182
3 3 6 -0.6041 0.0013
3 3 7 3.4908 -0.0102
3 3 8 1.9476 -0.0015
3 3 9 0.5442 -0.0001
3 3 10 2.6672 -0.0083
3 3 11 5.6825 -0.0042
3 3 12 5.8726 0.0035
3 3 13 2.0515 -0.0041
3 3 14 -3.0923 -0.0111
3 3 15 -4.5589 -0.0006
3 3 16 -1.0029 0.0092
3 3 17 2.8912 0.0026
3 3 18 2.8761 -0.0063
3 3 19 0.4803 -0.0050
3 3 20 -0.5847 -0.0001
3 3 21 0.2736 0.0003
3 3 22 1.0226 -0.0029
3 3 23 0.4897 -0.0019
3 3 24 -0.3971 0.0072
3 4 0 -6.6202 -0.0796
3 4 1 1.5675 0.0045
3 4 2 4.9963 0.0032
3 4 3 0.4661 -0.0336
3 4 4 -5.4254 -0.0197
3 4 5 -5.0091 0.0150
3 4 6 0.1690 0.0145
3 4 7 3.3576 0.0014
3 4 8 3.0557 0.0020
3 4 9 3.0679 -0.0063
3 4 10 5.2426 -0.0203
3 4 11 7.3634 -0.0074
3 4 12 6.4965 0.0147
3 4 13 2.1714 0.0069
3 4 14 -2.5956 -0.0100
3 4 15 -3.8020 -0.0019
3 4 16 -0.9773 0.0096
3 4 17 2.2348 0.0005
3 4 18 2.4501 -0.0069
3 4 19 0.0315 0.0039
3 4 20 -1.8032 0.0123
3 4 21 -0.7600 0.0055
3 4 22 1.7060 -0.0040
3 4 23 2.3997 -0.0054
3 4 24 0.9456 -0.0003
3 5 0 -3.9204 -0.1092
3 5 1 0.1300 -0.0192
3 5 2 1.7922 -0.0015
3 5 3 -0.3861 -0.0418
3 5 4 -3.3226 -0.0361
3 5 5 -3.3287 0.0106
3 5 6 -0.5639 0.0253
3 5 7 2.2802 0.0113
3 5 8 3.7163 0.0058
3 5 9 4.3230 -0.0027
3 5 10 5.0662 -0.0182
3 5 11 5.4249 -0.0101
3 5 12 3.6862 0.0127
3 5 13 -0.0198 0.0108
3 5 14 -2.7069 -0.0051
3 5 15 -2.2230 -0.0031
3 5 16 0.3135 0.0019
3 5 17 2.5190 -0.0078
3 5 18 2.4007 -0.0097
3 5 19 -0.8224 0.0065
3 5 20 -4.4250 0.0153
3 5 21 -3.8559 0.0084
3 5 22 0.5572 0.0034
3 5 23 3.4024 0.0035
3 5 24 2.2686 -0.0001
3 6 0 -1.3642 -0.0846
3 6 1 0.6549 -0.0364
3 6 2 2.0056 -0.0089
3 6 3 1.4437 -0.0275
3 6 4 -0.1966 -0.0259
3 6 5 -1.4373 0.0079
3 6 6 -1.0060 0.0187
3 6 7 1.3654 0.0038
3 6 8 3.6645 0.0021
3 6 9 3.8469 0.0069
3 6 10 2.8883 -0.0032
3 6 11 2.0531 -0.0091
3 6 12 0.1395 0.0019
3 6 13 -2.6872 0.0078
3 6 14 -3.4044 0.0016
3 6 15 -1.3959 -0.0018
3 6 16 0.8641 -0.0039
3 6 17 2.5061 -0.0096
3 6 18 3.1001 -0.0074
3 6 19 0.3059 0.0023
3 6 20 -4.6808 0.0037
3 6 21 -5.6896 0.0015
3 6 22 -1.1789 0.0093
3 6 23 2.7252 0.0161
3 6 24 2.2132 0.0086
3 7 0 -0.2502 -0.0244
3 7 1 1.3333 -0.0369
3 7 2 2.6910 -0.0042
3 7 3 2.6204 0.0130
3 7 4 1.7019 0.0082
3 7 5 0.3197 0.0049
3 7 6 -0.1601 -0.0028
3 7 7 1.7856 -0.0153
3 7 8 3.7837 -0.0089
3 7 9 2.5643 0.0107
3 7 10 0.0041 0.0112
3 7 11 -0.8938 -0.0049
3 7 12 -1.4785 -0.0085
3 7 13 -2.5986 0.0025
3 7 14 -1.9631 0.0076
3 7 15 -0.2354 0.0021
3 7 16 -0.2661 -0.0028
3 7 17 -0.3828 -0.0003
3 7 18 1.4681 0.0050
3 7 19 1.5667 0.0035
3 7 20 -1.9763 -0.0038
3 7 21 -3.6629 -0.0026
3 7 22 -0.5197 0.0101
3 7 23 2.4086 0.0171
3 7 24 1.5336 0.0104
3 8 0 -0.0839 0.0372
3 8 1 1.7916 -0.0206
3 8 2 2.9137 0.0094
3 8 3 2.2549 0.0524
3 8 4 1.3565 0.0384
3 8 5 0.3561 0.0003
3 8 6 0.0829 -0.0177
3 8 7 2.2821 -0.0201
3 8 8 4.2161 -0.0127
3 8 9 1.8359 0.0064
3 8 10 -2.1058 0.0155
3 8 11 -2.8141 0.0000
3 8 12 -1.4922 -0.0132
3 8 13 -0.3908 -0.0030
3 8 14 1.3388 0.0088
3 8 15 1.9675 0.0033
3 8 16 -1.1669 -0.0026
3 8 17 -4.0021 0.0055
3 8 18 -1.9044 0.0125
3 8 19 1.0563 0.0068
3 8 20 0.1861 0.0005
3 8 21 -0.9660 0.0037
3 8 22 1.0771 0.0087
3 8 23 2.8491 0.0069
3 9 0 -0.6516 0.0686
3 9 1 1.6738 -0.0010
3 9 2 2.9135 0.0120
3 9 3 1.6037 0.0538
3 9 4 -0.0664 0.0352
3 9 5 -1.4276 -0.0098
3 9 6 -1.5282 -0.0155
3 9 7 1.4480 -0.0017
3 9 8 4.2796 -0.0028
3 9 9 2.0285 -0.0002
3 9 10 -2.4315 0.0117
3 9 11 -3.1805 0.0058
3 9 12 -1.1335 -0.0110
3 9 13 0.4476 -0.0079
3 9 14 1.7538 0.0041
3 9 15 1.5850 -0.0003
3 9 16 -2.0288 -0.0076
3 9 17 -4.8738 -0.0011
3 9 18 -2.2526 0.0046
3 9 19 1.7108 0.0023
3 9 20 1.5000 0.0046
3 9 21 -0.2473 0.0081
3 9 22 0.4929 0.0012
3 9 23 1.7897 -0.0050
3 10 0 -1.8350 0.0630
3 10 1 0.7895 0.0115
3 10 2 2.5782 -0.0035
3 10 3 0.8943 0.0146
3 10 4 -1.9671 0.0032
3 10 5 -3.9704 -0.0199
3 10 6 -3.4921 -0.0039
3 10 7 0.6648 0.0205
3 10 8 4.5742 0.0083
3 10 9 3.0806 -0.0080
3 10 10 -0.9964 0.0030
3 10 11 -1.7189 0.0095
3 10 12 -0.2262 -0.0048
3 10 13 -0.3788 -0.0101
3 10 14 -1.5098 -0.0024
3 10 15 -2.5486 -0.0045
3 10 16 -4.1563 -0.0108
3 10 17 -4.0217 -0.0079
3 10 18 0.0695 -0.0050
3 10 19 4.0040 -0.0027
3 10 20 3.2835 0.0063
3 10 21 0.4432 0.0060
3 10 22 -0.4523 -0.0099
3 11 0 -3.0587 0.0365
3 11 1 -0.2301 0.0177
3 11 2 1.8031 -0.0222
3 11 3 -0.6472 -0.0306
3 11 4 -4.8116 -0.0242
3 11 5 -6.6611 -0.0174
3 11 6 -4.4114 0.0072
3 11 7 1.0707 0.0286
3 11 8 5.1663 0.0116
3 11 9 3.9348 -0.0145
3 11 10 0.3929 -0.0086
3 11 11 -0.4299 0.0063
3 11 12 0.2490 0.0006
3 11 13 -1.0436 -0.0080
3 11 14 -3.2281 -0.0062
3 11 15 -3.9820 -0.0062
3 11 16 -3.5366 -0.0071
3 11 17 -1.9581 -0.0038
3 11 18 0.9432 -0.0029
3 11 19 2.9372 0.0008
3 11 20 2.2855 0.0121
3 11 21 0.9065 0.0092
3 12 0 -2.7666 0.0042
3 12 1 -0.3974 0.0185
3 12 2 0.7552 -0.0274
3 12 3 -2.7263 -0.0489
3 12 4 -7.2117 -0.0259
3 12 5 -7.6262 -0.0037
3 12 6 -3.5520 0.0087
3 12 7 1.5672 0.0190
3 12 8 3.9042 0.0095
3 12 9 2.3469 -0.0139
3 12 10 -0.5252 -0.0172
3 12 11 -1.9327 -0.0013
3 12 12 -2.2319 0.0055
3 12 13 -2.5580 -0.0001
3 12 14 -1.9739 -0.0057
3 12 15 0.2954 -0.0066
3 12 16 2.6546 -0.0004
3 12 17 3.1198 0.0065
3 12 18 1.3648 0.0038
3 12 19 -1.3939 0.0032
3 12 20 -2.9134 0.0142
3 13 0 1.0821 -0.0247
3 13 1 1.3832 0.0120
3 13 2 -0.0016 -0.0156
3 13 3 -4.0124 -0.0330
3 13 4 -6.5926 -0.0066
3 13 5 -4.3268 0.0087
3 13 6 0.0620 -0.0024
3 13 7 1.6531 -0.0028
3 13 8 0.0813 0.0029
3 13 9 -1.6718 -0.0094
3 13 10 -2.7630 -0.0201
3 13 11 -4.3524 -0.0068
3 13 12 -5.7498 0.0111
3 13 13 -4.8198 0.0098
3 13 14 -1.2704 -0.0039
3 13 15 3.1490 -0.0085
3 13 16 6.4106 0.0034
3 13 17 6.5998 0.0138
3 13 18 2.7771 0.0058
3 14 0 6.9082 -0.0332
3 14 1 4.7566 0.0040
3 14 2 0.3962 0.0052
3 14 3 -3.3594 0.0007
3 14 4 -2.8454 0.0176
3 14 5 1.8808 0.0168
3 14 6 4.9015 -0.0103
3 14 7 1.5732 -0.0185
3 14 8 -3.8762 -0.0048
3 14 9 -4.8018 -0.0070
3 14 10 -2.7700 -0.0188
3 14 11 -3.0440 -0.0087
3 14 12 -4.3921 0.0119
3 14 13 -2.8486 0.0112
3 14 14 -0.0303 -0.0077
3 14 15 0.7237 -0.0146
3 14 16 0.5644 0.0011
3 15 5 6.2929 0.0165
3 15 6 6.9251 -0.0027
3 15 7 0.5526 -0.0115
3 15 8 -5.8862 -0.0027
3 15 9 -4.8022 -0.0006
3 15 10 0.0643 -0.0080
3 15 11 1.4725 -0.0050
4 -14 0 -3.4563 -0.0999
4 -14 1 -5.6493 -0.0399
4 -14 2 -4.8767 0.0131
4 -13 0 -1.8237 -0.1081
4 -13 1 -4.5498 -0.0659
4 -13 2 -3.5615 0.0009
4 -13 3 -0.2400 0.0081
4 -13 4 1.5749 -0.0020
4 -13 5 1.3952 0.0211
4 -13 6 0.9024 0.0366
4 -12 0 -1.7632 -0.0551
4 -12 1 -3.6198 -0.0578
4 -12 2 -2.3076 -0.0129
4 -12 3 0.1127 0.0057
4 -12 4 0.8367 -0.0063
4 -12 5 0.8855 0.0045
4 -12 6 1.6582 0.0266
4 -12 7 1.5817 0.0181
4 -12 8 0.1561 -0.0027
4 -12 9 -0.0996 -0.0035
4 -11 0 -3.8967 0.0357
4 -11 1 -3.5441 -0.0283
4 -11 2 -0.4307 -0.0298
4 -11 3 1.9827 0.0040
4 -11 4 1.3160 0.0064
4 -11 5 -0.1824 -0.0055
4 -11 6 -0.2683 0.0011
4 -11 7 0.0226 0.0052
4 -11 8 0.0238 -0.0036
4 -11 9 0.8871 -0.0029
4 -11 10 2.1189 0.0052
4 -11 11 1.7204 0.0003
4 -10 0 -4.3053 0.1164
4 -10 1 -2.2889 0.0091
4 -10 2 2.7020 -0.0383
4 -10 3 6.0680 0.0047
4 -10 4 5.1897 0.0261
4 -10 5 2.3040 -0.0061
4 -10 6 0.2669 -0.0226
4 -10 7 -0.5513 -0.0072
4 -10 8 -0.3512 0.0014
4 -10 9 0.7765 0.0014
4 -10 10 1.5408 0.0071
4 -10 11 0.8093 0.0034
4 -10 12 -0.6489 -0.0129
4 -10 13 -1.5906 -0.0138
4 -9 0 -1.3364 0.1358
4 -9 1 0.8393 0.0408
4 -9 2 5.0885 -0.0243
4 -9 3 7.6943 0.0105
4 -9 4 7.0345 0.0394
4 -9 5 4.8405 -0.0009
4 -9 6 3.0900 -0.0341
4 -9 7 2.1363 -0.0157
4 -9 8 1.7379 0.0032
4 -9 9 1.4915 -0.0003
4 -9 10 0.8290 0.0036
4 -9 11 -0.0854 0.0115
4 -9 12 -0.6670 0.0011
4 -9 13 -1.0668 -0.0089
4 -9 14 -1.4217 0.0002
4 -8 0 1.9427 0.0782
4 -8 1 3.8332 0.0521
4 -8 2 4.9416 0.0021
4 -8 3 4.1148 0.0091
4 -8 4 2.4780 0.0315
4 -8 5 1.8617 0.0062
4 -8 6 2.5288 -0.0247
4 -8 7 3.2987 -0.0132
4 -8 8 3.0844 0.0025
4 -8 9 1.7388 -0.0064
4 -8 10 0.2066 -0.0066
4 -8 11 -0.3203 0.0106
4 -8 12 -0.0025 0.0119
4 -8 13 -0.0434 -0.0003
4 -8 14 -0.5409 -0.0002
4 -8 15 -0.4407 -0.0011
4 -8 16 0.3762 -0.0144
4 -7 0 3.3944 -0.0179
4 -7 1 5.0849 0.0390
4 -7 2 3.3759 0.0180
4 -7 3 -0.7173 -0.0134
4 -7 4 -3.6870 -0.0032
4 -7 5 -3.4678 0.0084
4 -7 6 -1.1170 -0.0000
4 -7 7 0.9489 -0.0006
4 -7 8 1.0892 0.0043
4 -7 9 -0.3453 -0.0054
4 -7 10 -1.3356 -0.0109
4 -7 11 -0.7220 0.0028
4 -7 12 0.2707 0.0099
4 -7 13 0.2955 0.0010
4 -7 14 -0.0710 -0.0018
4 -7 15 0.1167 0.0003
4 -7 16 0.6360 -0.0058
4 -7 17 0.9703 -0.0050
4 -6 0 3.7179 -0.0962
4 -6 1 4.5619 0.0079
4 -6 2 1.9997 0.0131
4 -6 3 -2.4175 -0.0445
4 -6 4 -5.0955 -0.0436
4 -6 5 -4.5172 0.0054
4 -6 6 -2.1545 0.0228
4 -6 7 -0.3324 0.0097
4 -6 8 -0.5082 0.0043
4 -6 9 -1.9355 0.0012
4 -6 10 -2.2458 -0.0073
4 -6 11 -0.9260 -0.0050
4 -6 12 -0.0116 0.0038
4 -6 13 -0.2584 0.0025
4 -6 14 -0.3144 -0.0017
4 -6 15 0.0915 -0.0012
4 -6 16 0.1639 -0.0017
4 -6 17 0.2198 0.0017
4 -6 18 0.6020 0.0079
4 -5 0 2.3896 -0.1259
4 -5 1 1.7568 -0.0314
4 -5 2 0.2327 -0.0028
4 -5 3 -1.6873 -0.0518
4 -5 4 -2.4822 -0.0560
4 -5 5 -1.6397 0.0022
4 -5 6 0.0644 0.0296
4 -5 7 1.3808 0.0097
4 -5 8 1.0031 0.0008
4 -5 9 -0.5386 0.0060
4 -5 10 -0.8851 -0.0039
4 -5 11 0.1517 -0.0129
4 -5 12 0.3311 -0.0016
4 -5 13 -0.4164 0.0099
4 -5 14 -0.3814 0.0067
4 -5 15 -0.1198 -0.0015
4 -5 16 -0.7303 -0.0076
4 -5 17 -0.9825 -0.0070
4 -5 18 -0.2448 0.0022
4 -5 19 0.1126 0.0089
4 -4 0 -1.7154 -0.1009
4 -4 1 -3.7594 -0.0596
4 -4 2 -2.8182 -0.0078
4 -4 3 -0.8739 -0.0141
4 -4 4 0.3455 -0.0256
4 -4 5 0.8033 -0.0005
4 -4 6 1.6342 0.0143
4 -4 7 2.9787 -0.0003
4 -4 8 2.9835 -0.0026
4 -4 9 1.3287 0.0088
4 -4 10 0.5140 -0.0002
4 -4 11 1.1208 -0.0156
4 -4 12 1.0177 -0.0053
4 -4 13 0.1797 0.0141
4 -4 14 0.0483 0.0153
4 -4 15 -0.3057 0.0039
4 -4 16 -1.5355 -0.0072
4 -4 17 -1.6743 -0.0133
4 -4 18 -0.4201 -0.0101
4 -4 19 0.0999 -0.0004
4 -4 20 -0.0377 0.0077
4 -3 0 -6.6474 -0.0312
4 -3 1 -9.9876 -0.0543
4 -3 2 -5.8416 0.0102
4 -3 3 0.1292 0.0534
4 -3 4 2.4904 0.0300
4 -3 5 1.5357 -0.0027
4 -3 6 1.2745 -0.0117
4 -3 7 3.0303 -0.0116
4 -3 8 3.6030 -0.0046
4 -3 9 1.5317 0.0072
4 -3 10 -0.1402 0.0054
4 -3 11 0.2007 -0.0051
4 -3 12 0.6519 -0.0025
4 -3 13 0.5071 0.0081
4 -3 14 0.3596 0.0094
4 -3 15 -0.6237 0.0042
4 -3 16 -2.0634 0.0001
4 -3 17 -1.6001 -0.0033
4 -3 18 0.2222 -0.0048
4 -3 19 0.6620 -0.0042
4 -3 20 0.1921 -0.0049
4 -3 21 0.5436 -0.0064
4 -2 0 -9.7454 0.0497
4 -2 1 -14.1156 -0.0200
4 -2 2 -6.8749 0.0294
4 -2 3 2.1546 0.0974
4 -2 4 4.1784 0.0682
4 -2 5 0.8606 -0.0040
4 -2 6 -0.4092 -0.0250
4 -2 7 2.2911 -0.0084
4 -2 8 3.7358 -0.0015
4 -2 9 1.2268 -0.0011
4 -2 10 -1.4995 0.0059
4 -2 11 -1.5689 0.0105
4 -2 12 -0.4225 0.0062
4 -2 13 0.4387 -0.0012
4 -2 14 0.5321 -0.0058
4 -2 15 -0.7579 -0.0053
4 -2 16 -2.0079 -0.0011
4 -2 17 -0.9202 0.0044
4 -2 18 0.9735 0.0087
4 -2 19 0.8325 0.0067
4 -2 20 -0.1233 -0.0021
4 -2 21 0.0878 -0.0089
4 -2 22 0.1333 -0.0072
4 -1 0 -10.7664 0.1002
4 -1 1 -15.0478 0.0148
4 -1 2 -5.4435 0.0174
4 -1 3 4.5989 0.0720
4 -1 4 4.3997 0.0539
4 -1 5 -1.8869 -0.0107
4 -1 6 -3.7115 -0.0195
4 -1 7 0.4803 0.0116
4 -1 8 3.1084 0.0119
4 -1 9 0.5537 -0.0065
4 -1 10 -2.7405 -0.0003
4 -1 11 -2.9281 0.0155
4 -1 12 -1.0298 0.0101
4 -1 13 0.7829 -0.0058
4 -1 14 1.0402 -0.0107
4 -1 15 -0.5612 -0.0077
4 -1 16 -1.6445 -0.0058
4 -1 17 -0.2307 -0.0005
4 -1 18 1.2598 0.0095
4 -1 19 0.3265 0.0118
4 -1 20 -0.9302 0.0034
4 -1 21 -0.5278 -0.0026
4 -1 22 -0.2391 -0.0016
4 -1 23 -0.8634 -0.0008
4 0 0 -10.0095 0.1033
4 0 1 -12.6025 0.0332
4 0 2 -1.8020 -0.0194
4 0 3 6.8117 -0.0029
4 0 4 3.0335 0.0022
4 0 5 -5.8187 -0.0221
4 0 6 -7.3506 -0.0118
4 0 7 -1.6627 0.0249
4 0 8 1.5589 0.0253
4 0 9 -1.2290 -0.0013
4 0 10 -4.5753 -0.0052
4 0 11 -4.1520 0.0066
4 0 12 -1.0854 0.0026
4 0 13 1.6283 -0.0072
4 0 14 1.7160 -0.0025
4 0 15 -0.5689 0.0049
4 0 16 -1.8540 0.0011
4 0 17 -0.4637 -0.0015
4 0 18 0.5532 0.0052
4 0 19 -0.7502 0.0073
4 0 21 -0.3842 -0.0027
4 0 22 0.3366 -0.0007
4 0 23 -0.5085 -0.0037
4 1 0 -8.2826 0.0681
4 1 1 -7.9623 0.0381
4 1 2 2.8455 -0.0407
4 1 3 8.5813 -0.0590
4 1 4 1.6600 -0.0337
4 1 5 -7.9978 -0.0211
4 1 6 -8.2618 -0.0102
4 1 7 -1.6602 0.0132
4 1 8 1.0745 0.0216
4 1 9 -2.4034 0.0065
4 1 10 -5.5662 -0.0061
4 1 11 -4.2409 -0.0073
4 1 12 -0.2513 -0.0086
4 1 13 2.6275 -0.0075
4 1 14 1.9708 0.0037
4 1 15 -1.0071 0.0139
4 1 16 -2.2627 0.0113
4 1 17 -0.8052 0.0054
4 1 18 -0.2299 0.0052
4 1 19 -1.8036 0.0027
4 1 20 -2.1193 -0.0034
4 1 21 0.0590 -0.0024
4 1 22 1.4996 0.0018
4 1 23 0.5846 -0.0018
4 1 24 -0.5545 -0.0041
4 2 0 -8.0970 0.0101
4 2 1 -4.8040 0.0323
4 2 2 5.1258 -0.0254
4 2 3 8.4451 -0.0578
4 2 4 0.8843 -0.0276
4 2 5 -7.1691 0.0003
4 2 6 -5.8590 -0.0059
4 2 7 0.5749 -0.0105
4 2 8 2.2564 0.0026
4 2 9 -1.4480 0.0068
4 2 10 -3.7555 -0.0074
4 2 11 -1.5427 -0.0170
4 2 12 2.2676 -0.0110
4 2 13 3.6173 -0.0024
4 2 14 1.2019 0.0018
4 2 15 -2.1078 0.0062
4 2 16 -2.1900 0.0095
4 2 17 0.4307 0.0071
4 2 18 1.2530 0.0008
4 2 19 -0.6863 -0.0053
4 2 20 -1.5727 -0.0064
4 2 21 0.2048 0.0010
4 2 22 1.8081 0.0086
4 2 23 1.2699 0.0068
4 2 24 0.0321 0.0044
4 3 0 -9.3746 -0.0528
4 3 1 -4.7637 0.0127
4 3 2 3.2150 0.0080
4 3 3 5.3732 -0.0208
4 3 4 -0.0528 -0.0031
4 3 5 -4.9013 0.0253
4 3 6 -2.6796 0.0084
4 3 7 2.4345 -0.0204
4 3 8 3.1766 -0.0138
4 3 9 0.2142 0.0011
4 3 10 -0.5720 -0.0097
4 3 11 2.4982 -0.0183
4 3 12 5.4118 -0.0019
4 3 13 4.1097 0.0098
4 3 14 -0.8291 -0.0006
4 3 15 -4.4584 -0.0072
4 3 16 -2.8994 0.0013
4 3 17 1.6993 0.0034
4 3 18 4.0553 -0.0074
4 3 19 2.7680 -0.0142
4 3 20 0.9727 -0.0088
4 3 21 0.9173 0.0018
4 3 22 1.5422 0.0087
4 3 23 1.2421 0.0084
4 3 24 0.2890 0.0069
4 4 0 -8.1811 -0.0968
4 4 1 -4.4235 -0.0185
4 4 2 0.6185 0.0270
4 4 3 2.1152 0.0095
4 4 4 -0.5070 0.0079
4 4 5 -2.6320 0.0357
4 4 6 -0.7469 0.0298
4 4 7 2.5912 -0.0066
4 4 8 3.0633 -0.0156
4 4 9 1.3076 -0.0033
4 4 10 1.5523 -0.0085
4 4 11 4.8158 -0.0120
4 4 12 6.8283 0.0092
4 4 13 3.5226 0.0199
4 4 14 -3.1145 -0.0004
4 4 15 -6.8400 -0.0144
4 4 16 -4.5599 -0.0043
4 4 17 0.6751 0.0006
4 4 18 4.1746 -0.0091
4 4 19 4.2759 -0.0110
4 4 20 2.4367 -0.0016
4 4 21 1.0531 0.0043
4 4 22 1.1773 0.0041
4 4 23 1.6025 0.0025
4 4 24 0.9568 0.0006
4 5 0 -4.1030 -0.1004
4 5 1 -1.8661 -0.0491
4 5 2 0.8259 0.0155
4 5 3 1.9295 0.0114
4 5 4 0.9813 -0.0022
4 5 5 -0.2906 0.0270
4 5 6 0.0467 0.0441
4 5 7 1.7340 0.0161
4 5 8 2.6790 -0.0071
4 5 9 2.1462 -0.0025
4 5 10 2.3434 -0.0007
4 5 11 4.6435 -0.0019
4 5 12 5.7167 0.0118
4 5 13 1.8049 0.0180
4 5 14 -4.4127 -0.0010
4 5 15 -6.8097 -0.0158
4 5 16 -4.2070 -0.0099
4 5 17 -0.3045 -0.0053
4 5 18 2.1234 -0.0077
4 5 19 2.1714 -0.0009
4 5 20 -0.1477 0.0093
4 5 21 -2.3062 0.0084
4 5 22 -1.2734 0.0043
4 5 23 1.5434 0.0051
4 5 24 2.2600 0.0022
4 6 0 -1.7281 -0.0579
4 6 1 -0.3726 -0.0594
4 6 2 1.7576 -0.0118
4 6 3 3.1354 -0.0033
4 6 4 3.0159 -0.0184
4 6 5 1.7017 0.0032
4 6 6 0.3735 0.0331
4 6 7 0.5960 0.0213
4 6 8 1.9909 -0.0030
4 6 9 2.4207 -0.0006
4 6 10 2.1238 0.0096
4 6 11 3.0037 0.0073
4 6 12 3.1904 0.0054
4 6 13 -0.4066 0.0062
4 6 14 -4.8032 -0.0013
4 6 15 -4.7695 -0.0107
4 6 16 -1.4414 -0.0129
4 6 17 0.9282 -0.0119
4 6 18 1.6983 -0.0073
4 6 19 0.8937 0.0031
4 6 20 -2.8008 0.0072
4 6 21 -6.6806 0.0014
4 6 22 -5.5305 0.0027
4 6 23 -0.4552 0.0133
4 6 24 2.4069 0.0135
4 7 0 -2.5700 0.0138
4 7 1 -1.5023 -0.0363
4 7 2 0.9952 -0.0245
4 7 3 2.5717 -0.0065
4 7 4 2.7942 -0.0185
4 7 5 1.9112 -0.0206
4 7 6 0.1018 -0.0011
4 7 7 -0.6440 0.0026
4 7 8 0.7614 -0.0093
4 7 9 1.7413 -0.0036
4 7 10 1.0187 0.0134
4 7 11 0.8345 0.0113
4 7 12 0.8461 -0.0036
4 7 13 -1.5461 -0.0066
4 7 14 -4.0434 0.0008
4 7 15 -2.7616 0.0013
4 7 16 -0.0205 -0.0054
4 7 17 0.7441 -0.0063
4 7 18 1.2374 0.0022
4 7 19 1.8356 0.0080
4 7 20 -1.0838 0.0006
4 7 21 -6.0933 -0.0091
4 7 22 -6.5672 -0.0036
4 7 23 -2.0502 0.0114
4 7 24 1.2422 0.0141
4 8 0 -3.5070 0.0778
4 8 1 -2.2671 0.0087
4 8 2 0.6094 -0.0123
4 8 3 1.5420 0.0089
4 8 4 1.0589 0.0018
4 8 5 0.4409 -0.0271
4 8 6 -1.0581 -0.0299
4 8 7 -2.0061 -0.0152
4 8 8 -0.3454 -0.0118
4 8 9 1.2883 -0.0070
4 8 10 0.2854 0.0090
4 8 11 -0.7725 0.0104
4 8 12 -0.2844 -0.0085
4 8 13 -0.5474 -0.0149
4 8 14 -1.3379 0.0008
4 8 15 -0.7158 0.0103
4 8 16 -0.7886 0.0052
4 8 17 -2.7312 0.0065
4 8 18 -2.3489 0.0175
4 8 19 1.1027 0.0188
4 8 20 1.7385 0.0070
4 8 21 -1.6522 -0.0018
4 8 22 -3.0382 -0.0002
4 8 23 -0.5595 0.0040
4 9 0 -2.8390 0.0986
4 9 1 -1.2474 0.0448
4 9 2 2.1766 0.0051
4 9 3 2.4072 0.0197
4 9 4 0.4029 0.0202
4 9 5 -1.0836 -0.0175
4 9 6 -2.6188 -0.0338
4 9 7 -3.2105 -0.0123
4 9 8 -0.5748 0.0007
4 9 9 2.2395 -0.0031
4 9 10 1.2354 0.0038
4 9 11 -0.8338 0.0102
4 9 12 -0.3305 -0.0047
4 9 13 0.9283 -0.0162
4 9 14 1.0505 -0.0044
4 9 15 0.5675 0.0070
4 9 16 -1.5348 0.0049
4 9 17 -4.9095 0.0082
4 9 18 -4.8947 0.0182
4 9 19 -0.5452 0.0186
4 9 20 2.1609 0.0139
4 9 21 0.7266 0.0138
4 9 22 -0.2476 0.0099
4 9 23 1.3422 0.0009
4 10 0 -1.6010 0.0678
4 10 1 -0.0346 0.0508
4 10 2 3.8715 0.0083
4 10 3 3.7264 0.0081
4 10 4 0.0066 0.0181
4 10 5 -2.9281 -0.0046
4 10 6 -4.2686 -0.0203
4 10 7 -3.5848 0.0009
4 10 8 0.3716 0.0153
4 10 9 4.1321 0.0025
4 10 10 3.2302 -0.0011
4 10 11 0.2965 0.0097
4 10 12 -0.1353 0.0042
4 10 13 0.5308 -0.0104
4 10 14 -0.3101 -0.0093
4 10 15 -1.6788 -0.0024
4 10 16 -2.8317 -0.0021
4 10 17 -3.8106 0.0014
4 10 18 -2.6693 0.0061
4 10 19 0.7434 0.0035
4 10 20 2.4119 0.0056
4 10 21 0.8275 0.0125
4 10 22 -0.3488 0.0046
4 11 0 -1.2822 0.0091
4 11 1 0.5463 0.0310
4 11 2 4.6452 0.0003
4 11 3 3.6815 -0.0142
4 11 4 -2.2079 0.0044
4 11 5 -6.4606 0.0077
4 11 6 -6.3056 -0.0023
4 11 7 -3.0318 0.0084
4 11 8 1.9017 0.0185
4 11 9 5.2977 0.0023
4 11 10 4.1571 -0.0098
4 11 11 0.8854 0.0014
4 11 12 -0.6227 0.0071
4 11 13 -1.4346 -0.0035
4 11 14 -3.6001 -0.0104
4 11 15 -5.1786 -0.0089
4 11 16 -4.3083 -0.0045
4 11 17 -2.2583 0.0032
4 11 18 -0.1569 0.0048
4 11 19 1.7697 -0.0025
4 11 20 2.2789 -0.0009
4 11 21 1.0118 0.0044
4 12 0 -2.5483 -0.0449
4 12 1 0.4538 0.0027
4 12 2 4.8364 -0.0056
4 12 3 2.9719 -0.0255
4 12 4 -4.7524 -0.0047
4 12 5 -9.6433 0.0172
4 12 6 -7.4361 0.0106
4 12 7 -1.9877 0.0084
4 12 8 2.2787 0.0157
4 12 9 3.8062 0.0033
4 12 10 2.3803 -0.0155
4 12 11 -0.5352 -0.0111
4 12 12 -2.6889 0.0024
4 12 13 -3.8754 0.0008
4 12 14 -4.7147 -0.0093
4 12 15 -4.1306 -0.0131
4 12 16 -1.7406 -0.0048
4 12 17 0.0866 0.0099
4 12 18 -0.3128 0.0137
4 12 19 -1.4841 0.0057
4 12 20 -1.5875 0.0073
4 13 0 -3.1467 -0.0737
4 13 1 0.1235 -0.0209
4 13 2 3.9018 -0.0033
4 13 3 1.9192 -0.0171
4 13 4 -5.1062 -0.0044
4 13 5 -8.6557 0.0165
4 13 6 -5.0388 0.0088
4 13 7 -0.2821 0.0009
4 13 8 0.4926 0.0116
4 13 9 -0.6671 0.0091
4 13 10 -1.3100 -0.0108
4 13 11 -2.7455 -0.0139
4 13 12 -5.3266 0.0013
4 13 13 -6.4369 0.0063
4 13 14 -4.4060 -0.0046
4 13 15 -0.4198 -0.0133
4 13 16 2.9369 -0.0063
4 13 17 3.1711 0.0087
4 13 18 -0.1683 0.0112
4 14 1 1.3982 -0.0295
4 14 2 2.3640 0.0047
4 14 3 0.3533 0.0046
4 14 4 -3.5460 0.0031
4 14 5 -3.8646 0.0068
4 14 6 0.2890 -0.0035
4 14 7 1.8753 -0.0099
4 14 8 -2.2775 0.0032
4 14 9 -5.5471 0.0092
4 14 10 -3.7765 -0.0027
4 14 11 -2.2894 -0.0064
4 14 12 -4.7646 0.0046
4 14 13 -6.6278 0.0089
4 14 14 -4.2352 0.0008
4 14 15 -0.5491 -0.0052
5 -14 0 -4.5531 -0.0762
5 -14 1 -6.9919 -0.0725
5 -13 0 -2.7701 -0.0385
5 -13 1 -5.6642 -0.0756
5 -13 2 -7.6738 -0.0231
5 -13 3 -5.4562 0.0217
5 -13 4 -0.8555 0.0188
5 -13 5 1.5589 0.0236
5 -12 0 0.5786 0.0233
5 -12 1 -2.3786 -0.0316
5 -12 2 -4.1545 -0.0231
5 -12 3 -2.7536 0.0097
5 -12 4 0.2624 0.0105
5 -12 5 2.4061 0.0102
5 -12 6 3.0255 0.0317
5 -12 7 2.3721 0.0324
5 -12 8 0.7976 0.0041
5 -11 0 0.3956 0.0812
5 -11 1 -0.9226 0.0305
5 -11 2 -1.1116 -0.0153
5 -11 3 -0.3290 -0.0128
5 -11 4 0.2917 -0.0064
5 -11 5 0.8636 -0.0112
5 -11 6 1.7793 0.0017
5 -11 7 2.0768 0.0172
5 -11 8 1.1270 0.0043
5 -11 9 0.2256 -0.0118
5 -11 10 0.4379 0.0003
5 -10 0 -1.5581 0.1097
5 -10 1 -0.6464 0.0787
5 -10 2 2.1191 -0.0066
5 -10 3 3.7714 -0.0342
5 -10 4 2.7502 -0.0180
5 -10 5 0.8707 -0.0210
5 -10 6 -0.0572 -0.0252
5 -10 7 -0.4786 -0.0041
5 -10 8 -0.9096 0.0084
5 -10 9 -0.7298 -0.0025
5 -10 10 0.0125 -0.0037
5 -10 11 0.3563 0.0063
5 -10 12 0.0260 -0.0044
5 -9 0 -0.6502 0.0863
5 -9 1 1.3338 0.0898
5 -9 2 5.8584 0.0054
5 -9 3 8.3121 -0.0374
5 -9 4 6.8421 -0.0147
5 -9 5 3.7774 -0.0114
5 -9 6 1.4496 -0.0321
5 -9 7 0.0463 -0.0193
5 -9 8 -0.6193 0.0095
5 -9 9 -0.5405 0.0086
5 -9 10 -0.3450 -0.0010
5 -9 11 -0.3857 0.0063
5 -9 12 -0.2415 0.0018
5 -9 13 -0.1522 -0.0214
5 -9 14 -0.7277 -0.0203
5 -8 0 1.2536 0.0082
5 -8 1 3.5406 0.0555
5 -8 2 7.4085 0.0170
5 -8 3 8.7428 -0.0223
5 -8 4 6.7689 -0.0038
5 -8 5 4.0935 0.0085
5 -8 6 2.6091 -0.0160
5 -8 7 2.1447 -0.0205
5 -8 8 2.0262 0.0040
5 -8 9 1.6559 0.0073
5 -8 10 0.7655 -0.0067
5 -8 11 0.1748 0.0003
5 -8 12 0.6062 0.0106
5 -8 13 1.0198 -0.0029
5 -8 14 0.3014 -0.0127
5 -8 15 -0.6231 -0.0002
5 -8 16 -0.5044 0.0048
5 -7 0 0.5367 -0.0818
5 -7 1 3.0985 -0.0037
5 -7 2 5.2900 0.0218
5 -7 3 4.5330 -0.0032
5 -7 4 1.6465 0.0002
5 -7 5 -0.5001 0.0216
5 -7 6 -0.5377 0.0109
5 -7 7 0.8058 -0.0081
5 -7 8 2.0286 -0.0017
5 -7 9 1.9512 0.0025
5 -7 10 0.9565 -0.0106
5 -7 11 0.7137 -0.0105
5 -7 12 1.5677 0.0046
5 -7 13 1.9594 0.0051
5 -7 14 1.2183 -0.0029
5 -7 15 0.4619 0.0007
5 -7 16 0.4187 0.0028
5 -7 17 0.6972 -0.0044
5 -6 0 -0.3451 -0.1251
5 -6 1 1.8091 -0.0524
5 -6 2 2.6668 0.0175
5 -6 3 0.9498 0.0099
5 -6 4 -2.1333 -0.0032
5 -6 5 -4.1801 0.0230
5 -6 6 -3.9588 0.0326
5 -6 7 -1.9523 0.0058
5 -6 8 -0.0376 -0.0085
5 -6 9 0.1198 -0.0003
5 -6 10 -0.6362 -0.0013
5 -6 11 -0.3126 -0.0082
5 -6 12 0.7561 -0.0025
5 -6 13 0.9927 0.0038
5 -6 14 0.7553 0.0013
5 -6 15 0.9925 0.0018
5 -6 16 1.1239 0.0061
5 -6 17 0.8237 0.0063
5 -6 18 0.8173 0.0009
5 -5 0 0.9695 -0.1016
5 -5 1 1.6945 -0.0746
5 -5 2 1.8199 -0.0004
5 -5 3 0.9367 0.0122
5 -5 4 -0.9700 -0.0051
5 -5 5 -2.8756 0.0176
5 -5 6 -3.2566 0.0403
5 -5 7 -1.4987 0.0130
5 -5 8 0.4936 -0.0171
5 -5 9 0.3748 -0.0072
5 -5 10 -0.8689 0.0077
5 -5 11 -0.9729 0.0013
5 -5 12 -0.5898 -0.0022
5 -5 13 -0.9113 0.0064
5 -5 14 -0.6094 0.0085
5 -5 15 0.7198 0.0017
5 -5 16 1.0238 -0.0011
5 -5 17 0.1205 0.0040
5 -5 18 -0.1117 0.0099
5 -5 19 0.1906 0.0062
5 -4 0 1.6794 -0.0306
5 -4 1 0.3568 -0.0699
5 -4 2 0.2100 -0.0275
5 -4 3 1.3228 0.0052
5 -4 4 1.4521 -0.0034
5 -4 5 -0.1492 0.0040
5 -4 6 -1.2311 0.0261
5 -4 7 0.3727 0.0118
5 -4 8 2.6922 -0.0176
5 -4 9 2.3989 -0.0121
5 -4 10 0.4752 0.0076
5 -4 11 -0.2931 0.0036
5 -4 12 -0.5442 -0.0044
5 -4 13 -1.3491 0.0070
5 -4 14 -1.0498 0.0176
5 -4 15 0.3575 0.0083
5 -4 16 0.3088 -0.0077
5 -4 17 -0.8641 -0.0118
5 -4 18 -0.7905 -0.0028
5 -4 19 -0.1579 0.0082
5 -4 20 -0.3581 0.0136
5 -3 0 0.9808 0.0571
5 -3 1 -3.0902 -0.0346
5 -3 2 -3.3920 -0.0399
5 -3 3 0.0340 0.0032
5 -3 4 2.1688 0.0044
5 -3 5 0.5366 -0.0161
5 -3 6 -1.4692 -0.0094
5 -3 7 0.0036 0.0004
5 -3 8 2.7368 -0.0080
5 -3 9 2.3319 -0.0068
5 -3 10 -0.0629 0.0075
5 -3 11 -0.7741 0.0055
5 -3 12 -0.3010 -0.0071
5 -3 13 -0.3590 -0.0022
5 -3 14 -0.0309 0.0137
5 -3 15 0.4981 0.0149
5 -3 16 -0.4865 0.0001
5 -3 17 -1.5644 -0.0122
5 -3 18 -0.5963 -0.0113
5 -3 19 0.5299 -0.0030
5 -3 20 0.0822 0.0025
5 -3 21 -0.0401 0.0027
5 -2 0 1.4900 0.1211
5 -2 1 -5.6635 0.0213
5 -2 2 -5.9801 -0.0242
5 -2 3 -0.3694 0.0121
5 -2 4 3.1476 0.0191
5 -2 5 0.7436 -0.0261
5 -2 6 -2.5925 -0.0408
5 -2 7 -1.3620 -0.0120
5 -2 8 1.6648 0.0035
5 -2 9 0.8929 0.0003
5 -2 10 -2.3052 0.0070
5 -2 11 -3.0641 0.0127
5 -2 12 -1.3122 0.0001
5 -2 13 0.4186 -0.0115
5 -2 14 1.5054 -0.0041
5 -2 15 1.2979 0.0083
5 -2 16 -0.5873 0.0080
5 -2 17 -1.5055 0.0009
5 -2 18 0.1055 -0.0001
5 -2 19 1.2323 0.0027
5 -2 20 0.2210 -0.0001
5 -2 21 -0.3004 -0.0069
5 -2 22 0.4323 -0.0095
5 -1 0 2.1092 0.1219
5 -1 1 -7.0106 0.0627
5 -1 2 -6.7122 -0.0017
5 -1 3 0.7496 0.0122
5 -1 4 4.8507 0.0251
5 -1 5 1.2410 -0.0176
5 -1 6 -3.1880 -0.0413
5 -1 7 -1.6529 -0.0085
5 -1 8 2.1339 0.0153
5 -1 9 1.2230 0.0025
5 -1 10 -3.0283 -0.0020
5 -1 11 -4.6540 0.0122
5 -1 12 -2.5083 0.0093
5 -1 13 0.6533 -0.0113
5 -1 14 2.6907 -0.0167
5 -1 15 2.2078 -0.0035
5 -1 16 -0.1340 0.0044
5 -1 17 -0.8751 0.0024
5 -1 18 0.7963 0.0048
5 -1 19 1.2189 0.0107
5 -1 20 -0.6298 0.0082
5 -1 21 -1.3799 0.0006
5 -1 22 -0.2928 -0.0016
5 0 0 0.2428 0.0565
5 0 1 -8.9299 0.0635
5 0 2 -7.6388 0.0047
5 0 3 0.5617 -0.0106
5 0 4 4.2211 0.0088
5 0 5 -0.3466 -0.0025
5 0 6 -4.7184 -0.0169
5 0 7 -1.8746 0.0074
5 0 8 3.2290 0.0271
5 0 9 2.6563 0.0073
5 0 10 -2.2187 -0.0118
5 0 11 -4.7101 -0.0021
5 0 12 -2.7131 0.0054
5 0 13 1.0773 -0.0065
5 0 14 3.3638 -0.0130
5 0 15 2.2308 -0.0032
5 0 16 -0.6898 0.0022
5 0 17 -1.3957 -0.0036
5 0 18 0.2213 -0.0045
5 0 19 0.2350 0.0018
5 0 20 -1.7313 0.0026
5 0 21 -2.0844 0.0002
5 0 22 -0.5121 0.0028
5 0 23 0.0964 0.0046
5 1 0 -2.3379 -0.0331
5 1 1 -9.8790 0.0325
5 1 2 -7.8875 0.0006
5 1 3 -0.7035 -0.0355
5 1 4 1.4402 -0.0150
5 1 5 -3.4974 0.0089
5 1 6 -6.7218 0.0076
5 1 7 -2.3343 0.0135
5 1 8 3.6315 0.0267
5 1 9 3.2430 0.0158
5 1 10 -1.7112 -0.0099
5 1 11 -4.2289 -0.0173
5 1 12 -1.9005 -0.0080
5 1 13 2.2726 -0.0028
5 1 14 4.1089 -0.0012
5 1 15 1.7479 0.0048
5 1 16 -2.1143 0.0070
5 1 17 -3.1958 -0.0001
5 1 18 -1.8802 -0.0058
5 1 19 -1.8309 -0.0059
5 1 20 -2.8734 -0.0077
5 1 21 -1.8918 -0.0082
5 1 22 0.5117 -0.0020
5 1 23 1.0882 0.0017
5 2 0 -3.8710 -0.0942
5 2 1 -8.5170 -0.0043
5 2 2 -5.9839 0.0022
5 2 3 -0.5838 -0.0354
5 2 4 0.1544 -0.0234
5 2 5 -4.2440 0.0165
5 2 6 -6.1305 0.0196
5 2 7 -1.3441 0.0026
5 2 8 4.0761 0.0080
5 2 9 3.3260 0.0171
5 2 10 -1.3266 -0.0007
5 2 11 -3.1340 -0.0226
5 2 12 -0.0934 -0.0167
5 2 13 4.1116 0.0026
5 2 14 5.0007 0.0084
5 2 15 1.7172 0.0048
5 2 16 -2.1035 0.0046
5 2 17 -2.9057 0.0048
5 2 18 -1.9659 0.0014
5 2 19 -2.3250 -0.0029
5 2 20 -3.0598 -0.0064
5 2 21 -1.4702 -0.0054
5 2 22 1.3461 0.0020
5 2 23 2.1385 0.0059
5 2 24 0.6922 0.0009
5 3 0 -5.2630 -0.1002
5 3 1 -6.9556 -0.0279
5 3 2 -4.1920 0.0123
5 3 3 -0.1853 -0.0100
5 3 4 0.5200 -0.0146
5 3 5 -2.1423 0.0177
5 3 6 -2.9904 0.0214
5 3 7 0.7215 -0.0102
5 3 8 4.4391 -0.0157
5 3 9 3.1660 0.0075
5 3 10 -0.8176 0.0053
5 3 11 -1.6057 -0.0186
5 3 12 1.9372 -0.0147
5 3 13 5.2403 0.0109
5 3 14 4.2973 0.0140
5 3 15 0.4884 -0.0022
5 3 16 -1.5482 -0.0057
5 3 17 -0.0716 0.0018
5 3 18 1.9184 0.0019
5 3 19 1.6214 -0.0035
5 3 20 0.2670 -0.0046
5 3 21 0.2928 0.0003
5 3 22 1.4269 0.0085
5 3 23 1.7589 0.0122
5 3 24 0.8965 0.0055
5 4 0 -5.0594 -0.0587
5 4 1 -5.1966 -0.0339
5 4 2 -3.3271 0.0211
5 4 3 -0.7531 0.0218
5 4 4 0.4548 0.0006
5 4 5 -0.2874 0.0124
5 4 6 -0.5768 0.0203
5 4 7 1.5141 -0.0087
5 4 8 3.5716 -0.0258
5 4 9 2.1845 -0.0045
5 4 10 -0.9669 0.0070
5 4 11 -0.9019 -0.0079
5 4 12 2.7936 -0.0058
5 4 13 4.5916 0.0160
5 4 14 1.1280 0.0150
5 4 15 -3.5500 -0.0060
5 4 16 -3.7453 -0.0099
5 4 17 0.3878 0.0006
5 4 18 4.4326 0.0009
5 4 19 5.7942 -0.0055
5 4 20 5.0103 -0.0056
5 4 21 3.4019 -0.0022
5 4 22 1.9365 0.0014
5 4 23 1.0296 0.0041
5 4 24 0.4628 -0.0007
5 5 0 -1.6120 0.0009
5 5 1 -1.4925 -0.0287
5 5 2 -0.9688 0.0167
5 5 3 0.1390 0.0386
5 5 4 1.1196 0.0126
5 5 5 1.0023 0.0057
5 5 6 0.4160 0.0208
5 5 7 0.9766 0.0075
5 5 8 2.0899 -0.0178
5 5 9 1.2173 -0.0109
5 5 10 -1.1126 0.0075
5 5 11 -0.7546 0.0060
5 5 12 2.6671 0.0037
5 5 13 3.2613 0.0123
5 5 14 -1.8825 0.0086
5 5 15 -7.0758 -0.0062
5 5 16 -6.5573 -0.0072
5 5 17 -2.1670 0.0023
5 5 18 1.6951 0.0037
5 5 19 3.9315 0.0013
5 5 20 4.5377 0.0016
5 5 21 3.1010 -0.0024
5 5 22 1.1127 -0.0081
5 5 23 0.5953 -0.0069
5 5 24 0.8824 -0.0072
5 6 0 1.2671 0.0498
5 6 1 1.1057 -0.0180
5 6 2 1.3929 -0.0025
5 6 3 2.3096 0.0300
5 6 4 3.0424 0.0135
5 6 5 2.7829 -0.0036
5 6 6 1.5541 0.0147
5 6 7 0.7287 0.0211
5 6 8 1.1578 -0.0027
5 6 9 1.1833 -0.0117
5 6 10 -0.0744 0.0057
5 6 11 0.1589 0.0154
5 6 12 2.6728 0.0086
5 6 13 2.5509 0.0022
5 6 14 -2.4044 -0.0014
5 6 15 -6.3784 -0.0055
5 6 16 -5.0859 -0.0059
5 6 17 -2.1474 -0.0030
5 6 18 -1.1001 0.0002
5 6 19 -0.6495 0.0056
5 6 20 -0.4778 0.0074
5 6 21 -2.0416 -0.0021
5 6 22 -3.3646 -0.0109
5 6 23 -1.6127 -0.0051
5 6 24 1.1675 0.0016
5 7 0 -0.0111 0.0713
5 7 1 -0.8874 -0.0011
5 7 2 0.0514 -0.0202
5 7 3 1.8276 0.0071
5 7 4 2.7748 0.0046
5 7 5 2.8054 -0.0165
5 7 6 1.7298 -0.0052
5 7 7 0.0111 0.0158
5 7 8 -0.3154 0.0055
5 7 9 0.7806 -0.0113
5 7 10 1.1886 -0.0013
5 7 11 1.3901 0.0141
5 7 12 2.5675 0.0075
5 7 13 1.9977 -0.0065
5 7 14 -1.6350 -0.0067
5 7 15 -3.6432 -0.0006
5 7 16 -1.5522 -0.0025
5 7 17 0.2777 -0.0084
5 7 18 -0.5344 -0.0060
5 7 19 -1.2779 0.0020
5 7 20 -1.9385 0.0010
5 7 21 -4.8002 -0.0112
5 7 22 -7.1027 -0.0167
5 7 23 -4.7264 -0.0046
5 7 24 -0.1842 0.0079
5 8 0 -2.6754 0.0610
5 8 1 -4.1437 0.0195
5 8 2 -2.4943 -0.0205
5 8 3 -0.2744 -0.0103
5 8 4 0.1227 -0.0021
5 8 5 -0.0128 -0.0222
5 8 6 -0.6943 -0.0251
5 8 7 -2.8367 -0.0003
5 8 8 -3.6762 0.0073
5 8 9 -1.1871 -0.0088
5 8 10 1.4389 -0.0101
5 8 11 1.9180 0.0050
5 8 12 1.9049 0.0043
5 8 13 1.3988 -0.0088
5 8 14 -0.7435 -0.0064
5 8 15 -2.1779 0.0062
5 8 16 -1.3296 0.0055
5 8 17 -0.9066 -0.0026
5 8 18 -1.4873 -0.0004
5 8 19 -0.3418 0.0047
5 8 20 1.0084 -0.0020
5 8 21 -1.3131 -0.0146
5 8 22 -4.8122 -0.0184
5 8 23 -4.2689 -0.0115
5 9 0 -3.0083 0.0264
5 9 1 -4.4058 0.0331
5 9 2 -1.7631 -0.0061
5 9 3 0.7626 -0.0159
5 9 4 -0.1560 -0.0024
5 9 5 -1.8124 -0.0124
5 9 6 -3.1661 -0.0263
5 9 7 -5.8708 -0.0090
5 9 8 -6.9586 0.0104
5 9 9 -3.0726 -0.0000
5 9 10 1.6130 -0.0116
5 9 11 2.3874 -0.0011
5 9 12 1.5049 0.0051
5 9 13 1.4919 -0.0044
5 9 14 0.6435 -0.0047
5 9 15 -1.4778 0.0063
5 9 16 -3.2315 0.0079
5 9 17 -4.5344 0.0041
5 9 18 -4.6555 0.0081
5 9 19 -1.6820 0.0099
5 9 20 2.1131 0.0026
5 9 21 2.2007 -0.0023
5 9 22 -0.2509 -0.0036
5 9 23 -0.6835 -0.0094
5 10 0 -1.3065 -0.0157
5 10 1 -2.7970 0.0305
5 10 2 0.6462 0.0087
5 10 3 3.8412 -0.0155
5 10 4 2.0943 -0.0012
5 10 5 -1.1630 0.0058
5 10 6 -3.2049 -0.0114
5 10 7 -5.7578 -0.0102
5 10 8 -6.7263 0.0099
5 10 9 -2.4845 0.0089
5 10 10 2.8161 -0.0052
5 10 11 3.4011 -0.0001
5 10 12 1.6836 0.0103
5 10 13 1.6047 0.0048
5 10 14 1.1321 -0.0015
5 10 15 -1.5580 0.0018
5 10 16 -3.9833 0.0030
5 10 17 -4.5179 0.0031
5 10 18 -3.6790 0.0060
5 10 19 -1.4094 0.0011
5 10 20 1.2416 -0.0061
5 10 21 1.8077 -0.0002
5 10 22 0.7729 0.0049
5 11 0 0.0221 -0.0475
5 11 1 -1.5968 0.0116
5 11 2 1.7711 0.0142
5 11 3 4.7913 -0.0123
5 11 4 2.0151 -0.0001
5 11 5 -2.3355 0.0221
5 11 6 -3.4266 0.0067
5 11 7 -3.3696 -0.0120
5 11 8 -3.0869 -0.0009
5 11 9 0.0489 0.0079
5 11 10 3.8511 -0.0012
5 11 11 3.6639 -0.0008
5 11 12 1.2328 0.0106
5 11 13 0.2489 0.0109
5 11 14 -0.9143 0.0034
5 11 15 -3.5820 0.0008
5 11 16 -4.3442 0.0020
5 11 17 -1.7873 0.0064
5 11 18 0.7995 0.0072
5 11 19 1.5300 -0.0071
5 11 20 1.4714 -0.0212
5 11 21 1.0111 -0.0155
5 12 0 -1.4965 -0.0593
5 12 1 -1.5397 -0.0148
5 12 2 2.2249 0.0091
5 12 3 4.3351 -0.0073
5 12 4 -0.3721 0.0007
5 12 5 -6.2043 0.0288
5 12 6 -5.7874 0.0191
5 12 7 -1.8149 -0.0106
5 12 8 0.3155 -0.0097
5 12 9 1.3689 0.0041
5 12 10 2.5553 -0.0013
5 12 11 1.7938 -0.0075
5 12 12 -0.6378 0.0009
5 12 13 -2.2882 0.0070
5 12 14 -3.5844 0.0033
5 12 15 -4.9944 -0.0004
5 12 16 -3.9095 0.0030
5 12 17 -0.2283 0.0138
5 12 18 1.7911 0.0186
5 12 19 0.7628 0.0036
5 13 0 -5.3587 -0.0504
5 13 1 -3.0451 -0.0344
5 13 2 1.9903 0.0012
5 13 3 4.2128 0.0007
5 13 4 -1.0197 0.0004
5 13 5 -7.5737 0.0197
5 13 6 -6.6063 0.0172
5 13 7 -0.8279 -0.0051
5 13 8 1.3027 -0.0050
5 13 9 -0.4140 0.0086
5 13 10 -1.1773 0.0035
5 13 11 -1.1325 -0.0080
5 13 12 -2.5899 -0.0055
5 13 13 -4.3669 -0.0001
5 13 14 -4.6380 -0.0023
5 13 15 -3.4122 -0.0055
5 13 16 -1.0545 -0.0025
5 13 17 0.7556 0.0069
5 14 3 2.8327 0.0154
5 14 4 -0.1471 0.0061
5 14 5 -4.6680 0.0032
5 14 6 -3.3963 0.0019
5 14 7 1.2461 -0.0033
5 14 8 0.8266 0.0021
5 14 9 -3.7652 0.0116
5 14 10 -4.7863 0.0094
5 14 11 -2.2046 0.0037
5 14 12 -2.0256 0.0029
5 14 13 -4.3803 -0.0004
5 14 14 -4.6883 -0.0046
6 -13 0 -1.8130 0.0625
6 -13 1 -2.6954 -0.0282
6 -13 2 -6.8913 -0.0368
6 -13 3 -9.3283 0.0152
6 -13 4 -6.4491 0.0233
6 -12 0 2.4268 0.0929
6 -12 1 0.9147 0.0205
6 -12 2 -2.4975 -0.0206
6 -12 3 -4.4978 0.0069
6 -12 4 -3.2275 0.0236
6 -12 5 -0.5778 0.0030
6 -12 6 0.5325 -0.0033
6 -12 7 -0.2887 0.0077
6 -11 0 4.7416 0.0701
6 -11 1 3.2157 0.0588
6 -11 2 0.9541 0.0118
6 -11 3 -0.6406 -0.0011
6 -11 4 -1.1223 0.0063
6 -11 5 -0.3442 -0.0064
6 -11 6 1.0347 -0.0146
6 -11 7 1.4902 0.0009
6 -11 8 0.3098 0.0035
6 -11 9 -1.4594 -0.0166
6 -11 10 -2.3798 -0.0170
6 -10 0 1.8455 0.0057
6 -10 1 1.3855 0.0609
6 -10 2 1.6890 0.0319
6 -10 3 1.6474 -0.0147
6 -10 4 0.0775 -0.0206
6 -10 5 -1.3077 -0.0183
6 -10 6 -0.9484 -0.0225
6 -10 7 -0.2485 -0.0057
6 -10 8 -0.7394 0.0135
6 -10 9 -1.5781 -0.0013
6 -10 10 -1.6724 -0.0221
6 -10 11 -1.1997 -0.0088
6 -10 12 -0.3477 0.0110
6 -9 0 -0.6902 -0.0607
6 -9 1 -0.5645 0.0324
6 -9 2 2.2036 0.0356
6 -9 3 4.2641 -0.0206
6 -9 4 2.8425 -0.0341
6 -9 5 -0.0042 -0.0158
6 -9 6 -1.4535 -0.0150
6 -9 7 -1.9143 -0.0077
6 -9 8 -2.3944 0.0199
6 -9 9 -2.3150 0.0220
6 -9 10 -1.6926 -0.0051
6 -9 11 -1.3458 -0.0114
6 -9 12 -0.7507 0.0009
6 -9 13 0.5957 -0.0105
6 -9 14 1.2379 -0.0268
6 -8 0 0.1087 -0.1040
6 -8 1 0.0814 -0.0135
6 -8 2 3.5023 0.0261
6 -8 3 6.4491 -0.0118
6 -8 4 5.7636 -0.0267
6 -8 5 3.0325 0.0001
6 -8 6 0.9183 0.0056
6 -8 7 -0.2836 -0.0038
6 -8 8 -0.8086 0.0126
6 -8 9 -0.4443 0.0255
6 -8 10 -0.1159 0.0051
6 -8 11 -0.6259 -0.0084
6 -8 12 -0.6757 0.0043
6 -8 13 0.5707 0.0023
6 -8 14 1.3456 -0.0184
6 -8 15 0.4204 -0.0125
6 -7 0 -0.1802 -0.1076
6 -7 1 -0.0717 -0.0550
6 -7 2 2.6041 0.0093
6 -7 3 4.9903 0.0049
6 -7 4 4.8966 -0.0115
6 -7 5 3.2635 0.0098
6 -7 6 1.7615 0.0210
6 -7 7 0.9531 0.0019
6 -7 8 1.1277 -0.0019
6 -7 9 1.9862 0.0105
6 -7 10 2.1302 0.0012
6 -7 11 1.2146 -0.0137
6 -7 12 0.7861 -0.0021
6 -7 13 1.4090 0.0108
6 -7 14 1.6482 -0.0001
6 -7 15 0.7841 -0.0080
6 -7 16 -0.1721 0.0029
6 -7 17 -0.3497 0.0106
6 -6 0 -2.0310 -0.0576
6 -6 1 -1.7076 -0.0628
6 -6 2 -0.2952 -0.0002
6 -6 3 1.0489 0.0249
6 -6 4 1.2967 0.0057
6 -6 5 0.5506 0.0077
6 -6 6 -0.5224 0.0206
6 -6 7 -0.9289 0.0033
6 -6 8 0.0642 -0.0159
6 -6 9 1.5218 -0.0061
6 -6 10 1.8416 0.0024
6 -6 11 1.3029 -0.0078
6 -6 12 1.2021 -0.0089
6 -6 13 1.4347 0.0034
6 -6 14 1.3592 0.0048
6 -6 15 1.2016 -0.0019
6 -6 16 1.0154 0.0010
6 -6 17 0.5704 0.0080
6 -6 18 0.3920 0.0046
6 -5 0 -0.7856 0.0263
6 -5 1 -0.7796 -0.0328
6 -5 2 -0.8726 -0.0020
6 -5 3 -0.3817 0.0381
6 -5 4 0.1431 0.0239
6 -5 5 -0.4086 0.0071
6 -5 6 -1.9675 0.0154
6 -5 7 -2.6121 0.0045
6 -5 8 -1.2113 -0.0241
6 -5 9 0.3615 -0.0207
6 -5 10 0.2625 0.0069
6 -5 11 -0.4074 0.0130
6 -5 12 -0.4113 0.0012
6 -5 13 -0.3754 -0.0006
6 -5 14 -0.1457 0.0026
6 -5 15 1.1294 -0.0016
6 -5 16 2.0979 -0.0023
6 -5 17 1.2825 0.0081
6 -5 18 0.1528 0.0159
6 -5 19 0.0550 0.0035
6 -4 0 2.5911 0.0967
6 -4 1 1.9617 0.0082
6 -4 2 0.4323 -0.0114
6 -4 3 0.6256 0.0252
6 -4 4 1.7731 0.0279
6 -4 5 1.2388 0.0067
6 -4 6 -1.1411 0.0109
6 -4 7 -2.1709 0.0121
6 -4 8 -0.4065 -0.0164
6 -4 9 1.0842 -0.0281
6 -4 10 0.0764 0.0004
6 -4 11 -1.3850 0.0215
6 -4 12 -1.7298 0.0108
6 -4 13 -1.9236 -0.0003
6 -4 14 -1.4564 0.0028
6 -4 15 0.7536 0.0013
6 -4 16 2.3828 -0.0077
6 -4 17 1.3219 -0.0054
6 -4 18 -0.2216 0.0103
6 -4 19 -0.3543 0.0187
6 -4 20 -0.4494 0.0104
6 -3 0 3.9379 0.1218
6 -3 1 2.1986 0.0394
6 -3 2 -0.5867 -0.0264
6 -3 3 -0.1176 -0.0109
6 -3 4 2.1155 0.0084
6 -3 5 1.8207 -0.0066
6 -3 6 -1.2199 -0.0046
6 -3 7 -2.4781 0.0158
6 -3 8 -0.2314 0.0059
6 -3 9 1.3559 -0.0174
6 -3 10 -0.2452 -0.0083
6 -3 11 -2.0330 0.0125
6 -3 12 -1.9869 0.0060
6 -3 13 -1.6527 -0.0086
6 -3 14 -1.0821 -0.0029
6 -3 15 0.6855 0.0067
6 -3 16 1.6072 -0.0016
6 -3 17 0.3318 -0.0140
6 -3 18 -0.5016 -0.0095
6 -3 19 0.2549 0.0048
6 -3 20 0.2876 0.0113
6 -3 21 -0.4514 0.0091
6 -2 0 4.4095 0.0952
6 -2 1 0.9069 0.0553
6 -2 2 -2.8088 -0.0271
6 -2 3 -1.6713 -0.0395
6 -2 4 1.6238 -0.0156
6 -2 5 1.2815 -0.0242
6 -2 6 -2.6677 -0.0289
6 -2 7 -4.3212 0.0039
6 -2 8 -1.6991 0.0221
6 -2 9 0.0625 0.0019
6 -2 10 -1.8834 -0.0082
6 -2 11 -3.6785 0.0057
6 -2 12 -2.6059 0.0040
6 -2 13 -0.6988 -0.0154
6 -2 14 0.6284 -0.0154
6 -2 15 1.4800 0.0048
6 -2 16 0.7274 0.0117
6 -2 17 -1.1245 -0.0014
6 -2 18 -0.9851 -0.0103
6 -2 19 0.9212 -0.0055
6 -2 20 1.1496 -0.0007
6 -2 21 -0.0696 -0.0028
6 -2 22 0.0177 -0.0053
6 -1 0 5.4330 0.0257
6 -1 1 0.5068 0.0488
6 -1 2 -3.1190 -0.0099
6 -1 3 -0.7729 -0.0422
6 -1 4 3.3816 -0.0245
6 -1 5 2.5365 -0.0253
6 -1 6 -2.5983 -0.0374
6 -1 7 -4.7193 -0.0115
6 -1 8 -1.6349 0.0198
6 -1 9 0.5140 0.0092
6 -1 10 -1.8406 -0.0092
6 -1 11 -4.4233 0.0020
6 -1 12 -3.3738 0.0112
6 -1 13 -0.2255 -0.0069
6 -1 14 2.4137 -0.0197
6 -1 15 3.0784 -0.0032
6 -1 16 1.0228 0.0153
6 -1 17 -1.5289 0.0111
6 -1 18 -1.1062 0.0001
6 -1 19 0.9739 0.0005
6 -1 20 0.7965 0.0040
6 -1 21 -0.8077 0.0011
6 -1 22 -0.5811 -0.0017
6 0 0 4.3586 -0.0592
6 0 1 -0.9113 0.0195
6 0 2 -3.5629 0.0119
6 0 3 0.0116 -0.0255
6 0 4 4.7665 -0.0201
6 0 5 3.7513 -0.0085
6 0 6 -1.6633 -0.0188
6 0 7 -3.4261 -0.0131
6 0 8 0.6434 0.0093
6 0 9 3.6526 0.0058
6 0 10 1.1286 -0.0139
6 0 11 -2.8398 -0.0083
6 0 12 -3.2102 0.0101
6 0 13 -0.1354 0.0049
6 0 14 3.3222 -0.0112
6 0 15 4.1313 -0.0066
6 0 16 1.4259 0.0087
6 0 17 -1.4919 0.0073
6 0 18 -1.0739 -0.0039
6 0 19 0.6601 -0.0039
6 0 20 -0.1004 0.0039
6 0 21 -1.9309 0.0069
6 0 22 -1.4522 0.0082
6 0 23 0.3648 0.0101
6 1 0 1.2584 -0.1176
6 1 1 -3.5400 -0.0166
6 1 2 -5.4539 0.0280
6 1 3 -2.0096 -0.0002
6 1 4 2.3036 -0.0087
6 1 5 1.5815 0.0126
6 1 6 -2.6940 0.0118
6 1 7 -3.1260 -0.0031
6 1 8 2.0632 0.0003
6 1 9 5.9668 0.0049
6 1 10 3.7196 -0.0083
6 1 11 -1.0554 -0.0157
6 1 12 -2.6240 -0.0027
6 1 13 0.0358 0.0069
6 1 14 3.6060 0.0003
6 1 15 3.9716 -0.0036
6 1 16 0.3846 0.0018
6 1 17 -3.0379 -0.0002
6 1 18 -2.7703 -0.0109
6 1 19 -1.0446 -0.0138
6 1 20 -1.3076 -0.0080
6 1 21 -2.2176 -0.0041
6 1 22 -1.1816 -0.0000
6 1 23 0.5198 0.0061
6 2 0 -0.7731 -0.1198
6 2 1 -4.2165 -0.0417
6 2 2 -5.5485 0.0309
6 2 3 -3.3774 0.0214
6 2 4 -0.5104 0.0030
6 2 5 -1.0094 0.0245
6 2 6 -3.8768 0.0334
6 2 7 -3.4194 0.0062
6 2 8 1.7609 -0.0081
6 2 9 5.6831 0.0062
6 2 10 3.7731 0.0084
6 2 11 -0.8220 -0.0095
6 2 12 -2.2570 -0.0119
6 2 13 0.8046 0.0048
6 2 14 4.4822 0.0096
6 2 15 4.2233 -0.0008
6 2 16 -0.1017 -0.0056
6 2 17 -4.0451 -0.0037
6 2 18 -4.5346 -0.0051
6 2 19 -3.4254 -0.0063
6 2 20 -3.0868 -0.0051
6 2 21 -2.4629 -0.0072
6 2 22 -0.3945 -0.0081
6 2 23 1.2802 -0.0028
6 3 0 -1.9301 -0.0645
6 3 1 -3.3091 -0.0450
6 3 2 -3.6128 0.0172
6 3 3 -2.2655 0.0259
6 3 4 -0.3398 0.0042
6 3 5 -0.3289 0.0158
6 3 6 -2.2012 0.0318
6 3 7 -2.1210 0.0075
6 3 8 1.4813 -0.0160
6 3 9 4.2940 0.0022
6 3 10 2.3880 0.0201
6 3 11 -1.5652 0.0021
6 3 12 -2.0421 -0.0123
6 3 13 1.7949 0.0044
6 3 14 5.3855 0.0160
6 3 15 4.8379 0.0007
6 3 16 1.3691 -0.0129
6 3 17 -1.2003 -0.0075
6 3 18 -1.6652 0.0017
6 3 19 -1.7727 0.0059
6 3 20 -2.2729 0.0075
6 3 21 -1.8694 0.0040
6 3 22 -0.2059 -0.0003
6 3 23 1.0495 0.0016
6 3 24 0.7380 0.0001
6 4 0 -2.7521 0.0208
6 4 1 -2.6590 -0.0242
6 4 2 -2.4939 -0.0016
6 4 3 -1.7101 0.0173
6 4 4 -0.0768 -0.0022
6 4 5 0.8103 -0.0082
6 4 6 -0.0795 0.0085
6 4 7 -0.5723 0.0009
6 4 8 1.1901 -0.0199
6 4 9 2.6081 -0.0062
6 4 10 0.5042 0.0194
6 4 11 -2.7941 0.0105
6 4 12 -2.3197 -0.0080
6 4 13 1.6694 0.0020
6 4 14 3.9697 0.0151
6 4 15 2.4892 0.0030
6 4 16 0.7591 -0.0104
6 4 17 1.6201 -0.0051
6 4 18 3.3940 0.0036
6 4 19 3.6910 0.0056
6 4 20 2.7983 0.0062
6 4 21 1.9134 0.0038
6 4 22 1.1660 -0.0006
6 4 23 0.3735 0.0008
6 4 24 -0.1895 0.0003
6 5 0 -0.8495 0.0915
6 5 1 -0.5426 0.0083
6 5 2 -1.1678 -0.0126
6 5 3 -1.5634 0.0110
6 5 4 -0.8288 0.0015
6 5 5 0.1056 -0.0223
6 5 6 -0.0969 -0.0156
6 5 7 -0.5786 -0.0064
6 5 8 0.1973 -0.0172
6 5 9 0.7898 -0.0130
6 5 10 -1.2173 0.0114
6 5 11 -3.7788 0.0158
6 5 12 -2.6305 -0.0002
6 5 13 0.8393 -0.0028
6 5 14 0.9663 0.0051
6 5 15 -2.4591 0.0038
6 5 16 -3.6887 0.0015
6 5 17 -0.6406 0.0071
6 5 18 2.9169 0.0089
6 5 19 4.5933 0.0043
6 5 20 5.3676 0.0012
6 5 21 5.2967 -0.0042
6 5 22 3.4936 -0.0131
6 5 23 1.0579 -0.0140
6 5 24 -0.1936 -0.0102
6 6 0 2.9824 0.1142
6 6 1 2.7129 0.0324
6 6 2 1.2393 -0.0159
6 6 3 0.2726 0.0084
6 6 4 0.1962 0.0166
6 6 5 0.4563 -0.0142
6 6 6 0.3770 -0.0232
6 6 7 -0.0401 -0.0067
6 6 8 0.0003 -0.0066
6 6 9 0.1482 -0.0130
6 6 10 -1.1016 0.0009
6 6 11 -2.5887 0.0153
6 6 12 -1.2292 0.0078
6 6 13 1.3693 -0.0055
6 6 14 0.0768 -0.0066
6 6 15 -4.3453 0.0007
6 6 16 -5.8204 0.0090
6 6 17 -3.4037 0.0130
6 6 18 -1.5273 0.0096
6 6 19 -1.0380 0.0054
6 6 20 0.5168 0.0050
6 6 21 2.3093 -0.0009
6 6 22 2.0742 -0.0134
6 6 23 0.9641 -0.0167
6 6 24 0.8613 -0.0096
6 7 0 4.1704 0.0847
6 7 1 2.8045 0.0383
6 7 2 1.0461 -0.0142
6 7 3 0.9720 0.0024
6 7 4 1.4419 0.0250
6 7 5 1.7448 0.0011
6 7 6 2.1142 -0.0188
6 7 7 1.7561 -0.0027
6 7 8 0.7156 0.0078
6 7 9 0.4612 -0.0054
6 7 10 0.7995 -0.0092
6 7 11 0.8603 0.0050
6 7 12 1.6858 0.0088
6 7 13 2.8631 -0.0043
6 7 14 1.4188 -0.0114
6 7 15 -1.8751 -0.0025
6 7 16 -2.6421 0.0069
6 7 17 -1.2888 0.0045
6 7 18 -2.0285 -0.0028
6 7 19 -4.2277 -0.0029
6 7 20 -4.2819 0.0022
6 7 21 -3.0044 0.0006
6 7 22 -2.7399 -0.0067
6 7 23 -2.0654 -0.0055
6 8 0 2.0395 0.0201
6 8 1 -0.1945 0.0276
6 8 2 -2.0221 -0.0062
6 8 3 -1.1052 -0.0059
6 8 4 -0.0967 0.0171
6 8 5 0.1838 0.0090
6 8 6 1.0259 -0.0103
6 8 7 0.8263 0.0014
6 8 8 -1.1801 0.0194
6 8 9 -1.3641 0.0064
6 8 10 1.5094 -0.0145
6 8 11 3.6652 -0.0097
6 8 12 3.5185 0.0037
6 8 13 2.8243 0.0002
6 8 14 1.5891 -0.0072
6 8 15 -0.2925 -0.0019
6 8 16 -0.6641 0.0033
6 8 17 0.2875 -0.0036
6 8 18 -0.2923 -0.0115
6 8 19 -1.9169 -0.0109
6 8 20 -2.1636 -0.0086
6 8 21 -2.2575 -0.0098
6 8 22 -3.7525 -0.0103
6 8 23 -4.0821 -0.0052
6 9 0 -0.0022 -0.0504
6 9 1 -1.8672 0.0054
6 9 2 -3.0518 0.0045
6 9 3 -1.3992 -0.0121
6 9 4 -0.8788 -0.0010
6 9 5 -2.1856 0.0098
6 9 6 -2.4457 0.0023
6 9 7 -3.3013 0.0063
6 9 8 -6.2360 0.0233
6 9 9 -6.0637 0.0161
6 9 10 -0.4547 -0.0115
6 9 11 4.0415 -0.0173
6 9 12 3.3588 -0.0003
6 9 13 1.3223 0.0064
6 9 14 0.2738 0.0007
6 9 15 -1.5608 0.0002
6 9 16 -3.6103 0.0007
6 9 17 -3.7396 -0.0043
6 9 18 -2.4597 -0.0064
6 9 19 -0.7031 -0.0059
6 9 20 1.3995 -0.0110
6 9 21 2.0257 -0.0145
6 9 22 0.0221 -0.0107
6 10 0 -0.0857 -0.0917
6 10 1 -1.4286 -0.0165
6 10 2 -1.6261 0.0128
6 10 3 1.2122 -0.0131
6 10 4 1.7991 -0.0181
6 10 5 -0.9448 0.0073
6 10 6 -2.7017 0.0147
6 10 7 -4.4464 0.0068
6 10 8 -8.4131 0.0129
6 10 9 -8.9456 0.0157
6 10 10 -2.5224 -0.0023
6 10 11 3.2787 -0.0123
6 10 12 2.7297 0.0005
6 10 13 0.4755 0.0106
6 10 14 -0.1698 0.0067
6 10 15 -2.4520 0.0018
6 10 16 -6.3538 -0.0020
6 10 17 -7.2553 -0.0050
6 10 18 -4.4615 -0.0023
6 10 19 -1.1188 -0.0035
6 10 20 1.3036 -0.0142
6 10 21 2.4578 -0.0156
6 11 0 1.0325 -0.0845
6 11 1 -0.9016 -0.0283
6 11 2 -1.4321 0.0155
6 11 3 1.6875 -0.0067
6 11 4 2.8031 -0.0231
6 11 5 0.4049 0.0055
6 11 6 -0.4218 0.0200
6 11 7 -0.4040 -0.0023
6 11 8 -3.7298 -0.0121
6 11 9 -6.0734 0.0015
6 11 10 -2.1466 0.0048
6 11 11 2.5680 -0.0012
6 11 12 2.1344 0.0029
6 11 13 0.2865 0.0097
6 11 14 0.0539 0.0092
6 11 15 -2.0293 0.0062
6 11 16 -5.5269 0.0015
6 11 17 -4.9258 -0.0021
6 11 18 -0.6420 -0.0009
6 11 19 1.7016 -0.0088
6 11 20 1.1039 -0.0279
6 12 0 0.7959 -0.0416
6 12 1 -0.9836 -0.0314
6 12 2 -2.1461 0.0076
6 12 3 -0.4366 0.0007
6 12 4 -0.4696 -0.0170
6 12 5 -2.8896 0.0043
6 12 6 -1.5417 0.0183
6 12 7 2.9372 -0.0103
6 12 8 3.0911 -0.0311
6 12 9 -0.3797 -0.0138
6 12 10 -0.7169 0.0054
6 12 11 1.1631 0.0055
6 12 12 0.6291 0.0023
6 12 13 -0.6173 0.0035
6 12 14 -0.5181 0.0066
6 12 15 -1.7384 0.0107
6 12 16 -3.4715 0.0109
6 12 17 -1.0717 0.0094
6 12 18 3.5600 0.0100
6 13 1 -2.3918 -0.0272
6 13 2 -2.0066 -0.0063
6 13 3 -0.8636 0.0032
6 13 4 -2.5397 -0.0106
6 13 5 -6.4370 -0.0037
6 13 6 -5.0411 0.0089
6 13 7 2.2566 -0.0066
6 13 8 5.9085 -0.0232
6 13 9 2.4526 -0.0127
6 13 10 -1.1267 0.0035
6 13 11 -1.3275 0.0059
6 13 12 -1.2811 0.0012
6 13 13 -1.6393 -0.0035
6 13 14 -1.1167 -0.0028
6 13 15 -1.1225 0.0059
6 13 16 -1.5215 0.0127
6 14 6 -4.9314 -0.0058
6 14 7 1.1892 0.0021
6 14 8 5.0828 0.0012
6 14 9 1.4150 -0.0013
6 14 10 -3.3071 -0.0007
6 14 11 -3.2394 0.0051
7 -13 0 0.4195 0.1071
7 -13 1 1.6642 0.0429
7 -13 2 -1.9421 -0.0318
7 -12 0 1.7799 0.0822
7 -12 1 3.0980 0.0521
7 -12 2 0.7832 -0.0246
7 -12 3 -3.2923 -0.0307
7 -12 4 -5.3069 0.0119
7 -12 5 -4.2680 0.0105
7 -12 6 -3.1232 -0.0232
7 -11 0 4.9432 0.0149
7 -11 1 5.1524 0.0407
7 -11 2 3.2312 0.0076
7 -11 3 0.6495 -0.0129
7 -11 4 -1.3503 0.0116
7 -11 5 -2.0510 0.0189
7 -11 6 -1.8246 -0.0124
7 -11 7 -1.9960 -0.0296
7 -11 8 -3.0132 -0.0187
7 -11 9 -3.9205 -0.0149
7 -10 0 4.1898 -0.0775
7 -10 1 3.8177 -0.0049
7 -10 2 2.5029 0.0277
7 -10 3 1.4695 0.0080
7 -10 4 0.0292 0.0023
7 -10 5 -1.3141 0.0113
7 -10 6 -1.1610 -0.0022
7 -10 7 -0.4841 -0.0156
7 -10 8 -1.1436 -0.0035
7 -10 9 -2.3419 -0.0003
7 -10 10 -2.4601 -0.0226
7 -10 11 -1.9968 -0.0260
7 -9 0 0.5052 -0.1339
7 -9 1 -0.1128 -0.0561
7 -9 2 -0.3474 0.0254
7 -9 3 0.2755 0.0196
7 -9 4 -0.3036 -0.0086
7 -9 5 -1.8193 -0.0006
7 -9 6 -1.9917 0.0066
7 -9 7 -1.3238 -0.0008
7 -9 8 -1.7634 0.0105
7 -9 9 -2.3027 0.0231
7 -9 10 -1.3934 -0.0004
7 -9 11 -0.5288 -0.0265
7 -9 12 -0.8031 -0.0129
7 -9 13 -0.4229 0.0080
7 -8 0 -0.3596 -0.1177
7 -8 1 -1.6634 -0.0789
7 -8 2 -1.3814 0.0104
7 -8 3 0.2255 0.0244
7 -8 4 0.5407 -0.0075
7 -8 5 -0.5789 -0.0010
7 -8 6 -1.1501 0.0194
7 -8 7 -1.3425 0.0114
7 -8 8 -2.1507 0.0099
7 -8 9 -2.1238 0.0277
7 -8 10 -0.4947 0.0198
7 -8 11 0.2365 -0.0099
7 -8 12 -0.9233 -0.0120
7 -8 13 -1.1953 0.0034
7 -8 14 0.4683 -0.0040
7 -8 15 1.3760 -0.0137
7 -7 0 0.6060 -0.0459
7 -7 1 -1.1068 -0.0675
7 -7 2 -0.9924 -0.0108
7 -7 3 0.6447 0.0188
7 -7 4 1.8000 -0.0020
7 -7 5 1.9083 -0.0008
7 -7 6 1.5762 0.0226
7 -7 7 0.5087 0.0160
7 -7 8 -0.9297 -0.0003
7 -7 9 -0.7093 0.0107
7 -7 10 1.1309 0.0169
7 -7 11 1.5770 -0.0031
7 -7 12 -0.1286 -0.0090
7 -7 13 -1.0941 0.0102
7 -7 14 -0.0872 0.0126
7 -7 15 0.7248 -0.0054
7 -7 16 0.0537 -0.0067
7 -6 0 -0.4328 0.0459
7 -6 1 -1.6885 -0.0269
7 -6 2 -1.9481 -0.0240
7 -6 3 -0.9794 0.0091
7 -6 4 0.6927 0.0023
7 -6 5 2.2847 -0.0105
7 -6 6 2.6859 0.0024
7 -6 7 1.2239 0.0041
7 -6 8 -0.5300 -0.0120
7 -6 9 -0.1748 -0.0078
7 -6 10 1.6808 0.0071
7 -6 11 2.2021 -0.0012
7 -6 12 0.8604 -0.0124
7 -6 13 -0.3067 0.0023
7 -6 14 -0.2774 0.0170
7 -6 15 0.1270 0.0061
7 -6 16 0.1058 -0.0086
7 -6 17 -0.2288 -0.0051
7 -5 0 -1.0036 0.1174
7 -5 1 -1.3749 0.0287
7 -5 2 -2.2555 -0.0174
7 -5 3 -2.5591 0.0073
7 -5 4 -1.2119 0.0141
7 -5 5 0.9330 -0.0137
7 -5 6 1.5342 -0.0221
7 -5 7 -0.1228 -0.0138
7 -5 8 -1.6572 -0.0186
7 -5 9 -1.0085 -0.0173
7 -5 10 0.5573 0.0042
7 -5 11 0.9646 0.0131
7 -5 12 0.2979 -0.0008
7 -5 13 -0.4438 -0.0062
7 -5 14 -0.7308 0.0031
7 -5 15 -0.1455 0.0024
7 -5 16 0.8163 -0.0084
7 -5 17 0.7743 -0.0075
7 -5 18 -0.0519 0.0050
7 -5 19 -0.1904 0.0043
7 -4 0 1.3766 0.1309
7 -4 1 1.9434 0.0692
7 -4 2 0.1776 -0.0026
7 -4 3 -1.4968 0.0052
7 -4 4 -0.8271 0.0256
7 -4 5 0.9802 -0.0014
7 -4 6 0.9166 -0.0254
7 -4 7 -1.1707 -0.0149
7 -4 8 -2.2874 -0.0098
7 -4 9 -1.3076 -0.0171
7 -4 10 -0.4010 -0.0026
7 -4 11 -0.6982 0.0217
7 -4 12 -1.0873 0.0182
7 -4 13 -1.2151 -0.0017
7 -4 14 -1.1526 -0.0074
7 -4 15 0.1162 -0.0052
7 -4 16 2.0338 -0.0102
7 -4 17 2.0403 -0.0098
7 -4 18 0.2323 0.0076
7 -4 19 -0.7045 0.0208
7 -4 20 -0.5385 0.0072
7 -3 0 3.3300 0.0816
7 -3 1 4.4706 0.0746
7 -3 2 1.7246 0.0061
7 -3 3 -0.6967 -0.0087
7 -3 4 0.0504 0.0178
7 -3 5 1.8353 0.0083
7 -3 6 1.0931 -0.0143
7 -3 7 -1.4982 0.0002
7 -3 8 -2.3362 0.0152
7 -3 9 -1.1954 -0.0033
7 -3 10 -1.0168 -0.0139
7 -3 11 -2.0649 0.0066
7 -3 12 -2.2373 0.0166
7 -3 13 -1.6108 -0.0013
7 -3 14 -1.0414 -0.0133
7 -3 15 0.4502 -0.0070
7 -3 16 2.4248 -0.0059
7 -3 17 2.3042 -0.0124
7 -3 18 0.4780 -0.0049
7 -3 19 -0.1590 0.0149
7 -3 20 0.2332 0.0210
7 -2 0 2.9698 -0.0013
7 -2 1 3.9161 0.0481
7 -2 2 0.4846 0.0102
7 -2 3 -1.8295 -0.0222
7 -2 4 -0.3560 -0.0033
7 -2 5 1.6519 0.0056
7 -2 6 0.3414 -0.0068
7 -2 7 -2.6675 0.0094
7 -2 8 -3.2294 0.0349
7 -2 9 -1.8366 0.0168
7 -2 10 -2.0277 -0.0163
7 -2 11 -3.4924 -0.0128
7 -2 12 -3.3669 0.0034
7 -2 13 -1.8897 -0.0062
7 -2 14 -0.7697 -0.0195
7 -2 15 0.2747 -0.0088
7 -2 16 1.0571 0.0044
7 -2 17 0.2765 -0.0024
7 -2 18 -0.7327 -0.0117
7 -2 19 0.2481 -0.0051
7 -2 20 1.6030 0.0042
7 -2 21 1.0296 0.0028
7 -1 0 2.3412 -0.0820
7 -1 1 2.8427 0.0003
7 -1 2 -0.0543 0.0108
7 -1 3 -1.1604 -0.0219
7 -1 4 1.0457 -0.0181
7 -1 5 2.5366 0.0005
7 -1 6 -0.0274 -0.0025
7 -1 7 -3.7368 0.0053
7 -1 8 -3.8979 0.0297
7 -1 9 -1.6879 0.0222
7 -1 10 -1.5273 -0.0125
7 -1 11 -3.2879 -0.0189
7 -1 12 -3.5778 0.0015
7 -1 13 -1.9495 0.0024
7 -1 14 -0.2846 -0.0138
7 -1 15 0.5084 -0.0096
7 -1 16 -0.1787 0.0105
7 -1 17 -2.2095 0.0135
7 -1 18 -2.8985 -0.0008
7 -1 19 -0.6524 -0.0078
7 -1 20 1.5375 -0.0046
7 -1 21 1.0627 -0.0045
7 -1 22 -0.0537 -0.0065
7 0 0 1.5606 -0.1263
7 0 1 1.8527 -0.0489
7 0 2 0.6456 0.0070
7 0 3 1.4987 -0.0088
7 0 4 4.3920 -0.0210
7 0 5 5.1348 -0.0027
7 0 6 1.3221 0.0030
7 0 7 -3.0387 -0.0027
7 0 8 -2.7671 0.0060
7 0 9 0.6357 0.0078
7 0 10 1.7951 -0.0124
7 0 11 -0.1937 -0.0190
7 0 12 -1.8591 0.0036
7 0 13 -1.2491 0.0173
7 0 14 0.6793 0.0038
7 0 15 1.8997 -0.0048
7 0 16 0.5823 0.0084
7 0 17 -2.4782 0.0171
7 0 18 -3.5348 0.0058
7 0 19 -1.2852 -0.0050
7 0 20 0.6713 -0.0017
7 0 21 -0.0435 0.0041
7 0 22 -1.0000 0.0046
7 1 0 0.0400 -0.1107
7 1 1 -0.0023 -0.0702
7 1 2 -0.0933 0.0078
7 1 3 1.6368 0.0148
7 1 4 4.5416 -0.0109
7 1 5 5.1733 -0.0041
7 1 6 1.6534 0.0074
7 1 7 -2.2746 -0.0067
7 1 8 -1.5656 -0.0171
7 1 9 2.6501 -0.0097
7 1 10 4.8149 -0.0090
7 1 11 2.8699 -0.0140
7 1 12 -0.1077 -0.0012
7 1 13 -0.7183 0.0176
7 1 14 1.3114 0.0142
7 1 15 3.1302 -0.0005
7 1 16 1.6969 0.0002
7 1 17 -1.9287 0.0074
7 1 18 -3.3442 -0.0001
7 1 19 -1.3584 -0.0111
7 1 20 0.3399 -0.0073
7 1 21 -0.3878 0.0025
7 1 22 -1.2460 0.0061
7 1 23 -0.4380 0.0076
7 2 0 -0.6253 -0.0441
7 2 1 -0.9022 -0.0543
7 2 2 -0.9510 0.0131
7 2 3 -0.0963 0.0384
7 2 4 1.5570 0.0089
7 2 5 2.1453 -0.0002
7 2 6 -0.0701 0.0122
7 2 7 -2.8756 -0.0022
7 2 8 -2.0937 -0.0263
7 2 9 1.9823 -0.0180
7 2 10 4.5215 0.0027
7 2 11 2.8329 0.0017
7 2 12 -0.4782 -0.0030
7 2 13 -1.2235 0.0087
7 2 14 1.3630 0.0138
7 2 15 3.6360 -0.0009
7 2 16 1.9474 -0.0106
7 2 17 -2.2738 -0.0052
7 2 18 -4.3269 -0.0037
7 2 19 -2.9018 -0.0085
7 2 20 -1.0607 -0.0063
7 2 21 -0.6996 -0.0026
7 2 22 -0.5618 -0.0064
7 2 23 0.1542 -0.0070
7 3 0 -0.6734 0.0371
7 3 1 -0.4770 -0.0181
7 3 2 -0.2035 0.0071
7 3 3 -0.0217 0.0371
7 3 4 0.4909 0.0178
7 3 5 0.8793 0.0009
7 3 6 -0.4209 0.0137
7 3 7 -2.6707 0.0091
7 3 8 -2.6084 -0.0187
7 3 9 0.3570 -0.0175
7 3 10 2.4380 0.0114
7 3 11 0.8542 0.0170
7 3 12 -2.0154 0.0012
7 3 13 -1.8450 0.0027
7 3 14 1.7188 0.0119
7 3 15 4.4340 0.0000
7 3 16 2.9830 -0.0168
7 3 17 -0.9309 -0.0139
7 3 18 -3.4748 -0.0024
7 3 19 -3.6371 0.0043
7 3 20 -2.9545 0.0100
7 3 21 -2.1518 0.0089
7 3 22 -0.8996 -0.0038
7 3 23 0.2708 -0.0112
7 4 0 -1.7263 0.0955
7 4 1 -1.0399 0.0206
7 4 2 -0.2979 -0.0103
7 4 3 0.1374 0.0069
7 4 4 0.6129 0.0046
7 4 5 1.1641 -0.0108
7 4 6 0.5682 0.0013
7 4 7 -1.2033 0.0132
7 4 8 -1.7782 -0.0044
7 4 9 -0.1632 -0.0124
7 4 10 0.8808 0.0103
7 4 11 -0.9358 0.0202
7 4 12 -3.2002 0.0025
7 4 13 -2.0936 -0.0041
7 4 14 1.7235 0.0061
7 4 15 4.1515 0.0024
7 4 16 3.6090 -0.0116
7 4 17 2.1629 -0.0116
7 4 18 1.2821 -0.0014
7 4 19 0.3129 0.0062
7 4 20 -0.9388 0.0134
7 4 21 -1.4565 0.0151
7 4 22 -1.0011 0.0047
7 4 23 -0.5164 -0.0023
7 5 0 -1.7375 0.1059
7 5 1 -1.3582 0.0477
7 5 2 -1.3737 -0.0222
7 5 3 -1.4216 -0.0236
7 5 4 -1.3096 -0.0089
7 5 5 -0.9865 -0.0198
7 5 6 -0.8977 -0.0186
7 5 7 -1.2750 0.0012
7 5 8 -1.2388 0.0015
7 5 9 -0.3679 -0.0075
7 5 10 -0.3493 0.0052
7 5 11 -2.3398 0.0171
7 5 12 -3.9099 0.0033
7 5 13 -2.3938 -0.0112
7 5 14 0.3035 -0.0067
7 5 15 0.8548 0.0002
7 5 16 0.3153 0.0012
7 5 17 1.5949 0.0039
7 5 18 3.7688 0.0042
7 5 19 4.1259 -0.0009
7 5 20 3.0389 -0.0011
7 5 21 2.3364 0.0022
7 5 22 1.7668 -0.0021
7 5 23 0.4472 -0.0053
7 6 0 1.4381 0.0673
7 6 1 1.1974 0.0514
7 6 2 -0.3281 -0.0221
7 6 3 -1.5434 -0.0335
7 6 4 -2.3883 -0.0036
7 6 5 -3.1003 -0.0077
7 6 6 -2.9587 -0.0255
7 6 7 -1.8877 -0.0157
7 6 8 -0.8790 -0.0026
7 6 9 -0.5378 -0.0048
7 6 10 -1.1441 0.0004
7 6 11 -2.6154 0.0127
7 6 12 -3.2283 0.0074
7 6 13 -1.7161 -0.0101
7 6 14 -0.5187 -0.0154
7 6 15 -2.0969 -0.0050
7 6 16 -3.8235 0.0098
7 6 17 -2.3576 0.0180
7 6 18 0.3121 0.0114
7 6 19 1.0747 -0.0029
7 6 20 1.2508 -0.0072
7 6 21 2.7423 -0.0022
7 6 22 3.8231 -0.0032
7 6 23 2.7502 -0.0079
7 7 0 4.7659 0.0077
7 7 1 4.1536 0.0344
7 7 2 1.5795 -0.0127
7 7 3 0.1436 -0.0260
7 7 4 -0.3548 0.0091
7 7 5 -1.2535 0.0139
7 7 6 -1.1397 -0.0159
7 7 7 0.5851 -0.0225
7 7 8 1.4729 -0.0054
7 7 9 0.5931 0.0001
7 7 10 -0.2578 -0.0032
7 7 11 -0.3844 0.0022
7 7 12 -0.1413 0.0060
7 7 13 0.7019 -0.0032
7 7 14 1.0527 -0.0127
7 7 15 -0.6274 -0.0075
7 7 16 -2.5427 0.0076
7 7 17 -2.3888 0.0152
7 7 18 -2.1023 0.0071
7 7 19 -3.6809 -0.0049
7 7 20 -4.4600 -0.0041
7 7 21 -2.1237 0.0076
7 7 22 0.9035 0.0134
7 7 23 2.0300 0.0100
7 8 0 4.5830 -0.0433
7 8 1 4.3749 0.0099
7 8 2 1.3630 0.0045
7 8 3 0.2947 -0.0082
7 8 4 1.0635 0.0134
7 8 5 0.9000 0.0240
7 8 6 1.3060 -0.0002
7 8 7 3.3442 -0.0147
7 8 8 3.5748 0.0007
7 8 9 1.4029 0.0102
7 8 10 0.9894 -0.0026
7 8 11 2.8085 -0.0115
7 8 12 3.3173 -0.0037
7 8 13 2.3593 0.0018
7 8 14 2.0398 -0.0038
7 8 15 1.8777 -0.0066
7 8 16 1.2131 -0.0011
7 8 17 0.9079 0.0018
7 8 18 0.1129 -0.0031
7 8 19 -2.4047 -0.0083
7 8 20 -4.5266 -0.0056
7 8 21 -4.0349 0.0060
7 8 22 -2.3530 0.0183
7 9 0 1.5818 -0.0755
7 9 1 3.3177 -0.0167
7 9 2 0.8937 0.0201
7 9 3 -0.0004 0.0106
7 9 4 0.9421 0.0063
7 9 5 0.1300 0.0180
7 9 6 -0.4482 0.0152
7 9 7 1.2108 0.0048
7 9 8 1.0245 0.0121
7 9 9 -1.5510 0.0196
7 9 10 -0.6368 0.0023
7 9 11 3.5477 -0.0172
7 9 12 4.1559 -0.0107
7 9 13 0.9482 0.0051
7 9 14 -0.4826 0.0053
7 9 15 0.1392 -0.0035
7 9 16 -0.3208 -0.0077
7 9 17 -0.9824 -0.0071
7 9 18 -0.1428 -0.0033
7 9 19 0.7139 -0.0001
7 9 20 0.5122 -0.0028
7 9 21 0.0283 -0.0035
7 10 0 -1.1677 -0.0803
7 10 1 2.7047 -0.0383
7 10 2 1.6587 0.0228
7 10 3 1.3677 0.0193
7 10 4 2.1676 -0.0089
7 10 5 -0.0657 0.0002
7 10 6 -2.6163 0.0225
7 10 7 -2.1393 0.0215
7 10 8 -2.9785 0.0156
7 10 9 -6.0965 0.0172
7 10 10 -4.5174 0.0065
7 10 11 1.4528 -0.0114
7 10 12 2.6707 -0.0098
7 10 13 -1.6207 0.0046
7 10 14 -3.8519 0.0077
7 10 15 -3.6194 -0.0001
7 10 16 -5.5714 -0.0080
7 10 17 -7.4589 -0.0098
7 10 18 -4.7471 -0.0003
7 10 19 0.1023 0.0107
7 10 20 2.5444 0.0054
7 11 0 -1.2711 -0.0468
7 11 1 2.2617 -0.0405
7 11 2 1.0538 0.0157
7 11 3 0.8691 0.0197
7 11 4 2.2220 -0.0192
7 11 5 0.6437 -0.0185
7 11 6 -1.2853 0.0143
7 11 7 -0.0187 0.0179
7 11 8 -0.7091 -0.0000
7 11 9 -5.3286 -0.0009
7 11 10 -5.8399 0.0057
7 11 11 -0.6552 0.0013
7 11 12 1.0333 -0.0038
7 11 13 -2.6301 -0.0030
7 11 14 -4.3799 -0.0015
7 11 15 -4.1317 0.0001
7 11 16 -6.8526 -0.0027
7 11 17 -9.1139 -0.0099
7 11 18 -5.3737 -0.0067
7 11 19 0.3027 0.0036
7 12 0 0.5811 0.0119
7 12 1 2.1981 -0.0241
7 12 2 -0.9635 0.0028
7 12 3 -3.1125 0.0165
7 12 4 -2.5587 -0.0139
7 12 5 -2.6506 -0.0243
7 12 6 -1.1173 -0.0010
7 12 7 4.4492 0.0008
7 12 8 6.9069 -0.0209
7 12 9 1.8497 -0.0208
7 12 10 -2.5502 0.0012
7 12 11 -1.1313 0.0132
7 12 12 -0.2609 0.0057
7 12 13 -2.5609 -0.0093
7 12 14 -2.7596 -0.0141
7 12 15 -1.3934 -0.0020
7 12 16 -3.0667 0.0064
7 12 17 -4.2479 -0.0035
7 13 3 -5.3445 0.0062
7 13 4 -7.2444 -0.0038
7 13 5 -8.1411 -0.0213
7 13 6 -5.0374 -0.0137
7 13 7 4.1413 -0.0076
7 13 8 11.0844 -0.0181
7 13 9 8.1942 -0.0202
7 13 10 1.4896 -0.0037
7 13 11 -1.0875 0.0141
7 13 12 -1.6270 0.0145
7 13 13 -2.5755 -0.0045
7 13 14 -1.0802 -0.0181
8 -12 0 0.0181 -0.0149
8 -12 1 3.1600 0.0430
8 -12 2 3.6663 0.0027
8 -12 3 0.8905 -0.0509
8 -12 4 -2.3413 -0.0295
8 -11 0 -0.0774 -0.0599
8 -11 1 2.5440 -0.0007
8 -11 2 3.5051 0.0044
8 -11 3 2.3602 -0.0305
8 -11 4 0.1879 -0.0193
8 -11 5 -1.6984 0.0229
8 -11 6 -2.8377 0.0195
8 -11 7 -3.9537 -0.0196
8 -11 8 -5.3176 -0.0320
8 -10 0 1.4903 -0.0864
8 -10 1 2.5594 -0.0451
8 -10 2 2.3032 0.0090
8 -10 3 1.6852 0.0090
8 -10 4 0.9704 0.0003
8 -10 5 -0.2222 0.0233
8 -10 6 -1.1291 0.0305
8 -10 7 -1.5733 -0.0007
8 -10 8 -2.8112 -0.0202
8 -10 9 -4.2687 -0.0094
8 -10 10 -3.6307 -0.0056
8 -9 0 1.1453 -0.0765
8 -9 1 1.4912 -0.0753
8 -9 2 0.1180 0.0002
8 -9 3 -0.7851 0.0333
8 -9 4 -0.8226 0.0090
8 -9 5 -0.9774 0.0047
8 -9 6 -0.6038 0.0213
8 -9 7 0.3008 0.0109
8 -9 8 -0.4085 -0.0060
8 -9 9 -2.3051 0.0032
8 -9 10 -1.8851 0.0076
8 -9 11 0.6137 -0.0112
8 -9 12 1.0828 -0.0136
8 -8 0 0.2835 -0.0143
8 -8 1 0.2526 -0.0617
8 -8 2 -1.4321 -0.0103
8 -8 3 -2.5614 0.0362
8 -8 4 -2.6397 0.0121
8 -8 5 -2.4319 -0.0092
8 -8 6 -1.3579 0.0102
8 -8 7 0.2098 0.0145
8 -8 8 -0.0420 -0.0042
8 -8 9 -1.4238 0.0015
8 -8 10 -0.3734 0.0182
8 -8 11 2.2491 0.0044
8 -8 12 1.8580 -0.0154
8 -8 13 -1.1661 -0.0068
8 -8 14 -2.0887 0.0061
8 -7 0 1.0191 0.0673
8 -7 1 0.2357 -0.0115
8 -7 2 -1.3175 -0.0171
8 -7 3 -2.1784 0.0184
8 -7 4 -2.0869 0.0104
8 -7 5 -1.5522 -0.0097
8 -7 6 -0.4355 0.0078
8 -7 7 0.4204 0.0187
8 -7 8 -0.5278 -0.0045
8 -7 9 -1.6359 -0.0104
8 -7 10 0.1681 0.0125
8 -7 11 2.9607 0.0142
8 -7 12 2.1646 -0.0059
8 -7 13 -1.1856 -0.0058
8 -7 14 -2.1801 0.0073
8 -7 15 -0.4420 0.0032
8 -6 0 1.1884 0.1187
8 -6 1 -0.0297 0.0414
8 -6 2 -1.1748 -0.0215
8 -6 3 -1.6144 -0.0127
8 -6 4 -1.0352 -0.0008
8 -6 5 0.3939 -0.0112
8 -6 6 1.8883 -0.0028
8 -6 7 1.7304 0.0119
8 -6 8 -0.6292 -0.0023
8 -6 9 -2.2534 -0.0150
8 -6 10 -0.4245 0.0013
8 -6 11 2.2953 0.0098
8 -6 12 1.7452 -0.0060
8 -6 13 -1.0128 -0.0073
8 -6 14 -1.9641 0.0135
8 -6 15 -0.7195 0.0183
8 -6 16 0.1248 -0.0009
8 -6 17 -0.2073 -0.0134
8 -5 0 -0.1122 0.1134
8 -5 1 -0.5596 0.0711
8 -5 2 -1.0446 -0.0172
8 -5 3 -1.7075 -0.0336
8 -5 4 -1.4675 -0.0076
8 -5 5 0.4026 -0.0106
8 -5 6 2.4455 -0.0217
8 -5 7 2.0401 -0.0110
8 -5 8 -0.8400 -0.0043
8 -5 9 -2.6749 -0.0081
8 -5 10 -1.2744 0.0007
8 -5 11 0.8217 0.0094
8 -5 12 0.4895 -0.0042
8 -5 13 -1.4067 -0.0154
8 -5 14 -2.2633 -0.0004
8 -5 15 -1.5987 0.0148
8 -5 16 -0.6354 0.0038
8 -5 17 -0.2480 -0.0154
8 -5 18 -0.2647 -0.0156
8 -4 0 -0.4002 0.0508
8 -4 1 0.8812 0.0640
8 -4 2 0.9463 -0.0054
8 -4 3 -0.6509 -0.0337
8 -4 4 -1.6449 -0.0019
8 -4 5 -0.3713 0.0033
8 -4 6 1.4482 -0.0255
8 -4 7 0.9270 -0.0277
8 -4 8 -1.5681 -0.0058
8 -4 9 -2.7914 0.0022
8 -4 10 -1.5644 0.0044
8 -4 11 -0.1726 0.0139
8 -4 12 -0.3873 0.0102
8 -4 13 -1.4169 -0.0086
8 -4 14 -1.9778 -0.0133
8 -4 15 -1.5951 -0.0012
8 -4 16 -0.4828 0.0010
8 -4 17 0.2070 -0.0099
8 -4 18 -0.3383 -0.0100
8 -4 19 -0.9839 0.0033
8 -3 0 0.6433 -0.0375
8 -3 1 3.2848 0.0268
8 -3 2 3.0327 0.0057
8 -3 3 0.4297 -0.0226
8 -3 4 -1.0619 0.0031
8 -3 5 0.1226 0.0185
8 -3 6 1.5222 -0.0109
8 -3 7 0.4133 -0.0235
8 -3 8 -2.1028 0.0015
8 -3 9 -3.0601 0.0129
8 -3 10 -2.1333 0.0018
8 -3 11 -1.2064 0.0040
8 -3 12 -0.9375 0.0139
8 -3 13 -0.7712 0.0037
8 -3 14 -0.5957 -0.0117
8 -3 15 -0.1116 -0.0075
8 -3 16 1.0430 0.0013
8 -3 17 1.6411 -0.0039
8 -3 18 0.5096 -0.0061
8 -3 19 -0.8620 0.0090
8 -3 20 -0.7919 0.0192
8 -2 0 1.1336 -0.1011
8 -2 1 3.8205 -0.0149
8 -2 2 2.3310 0.0162
8 -2 3 -0.8814 -0.0040
8 -2 4 -1.5838 0.0039
8 -2 5 0.6793 0.0237
8 -2 6 2.2545 0.0074
8 -2 7 0.6834 -0.0086
8 -2 8 -2.1500 0.0108
8 -2 9 -3.4575 0.0215
8 -2 10 -3.3305 -0.0016
8 -2 11 -3.0215 -0.0149
8 -2 12 -2.3763 -0.0010
8 -2 13 -1.2072 0.0039
8 -2 14 -0.3271 -0.0081
8 -2 15 0.2583 -0.0077
8 -2 16 1.1605 0.0046
8 -2 17 1.5640 0.0034
8 -2 18 0.7197 -0.0065
8 -2 19 0.0811 -0.0020
8 -2 20 0.6951 0.0101
8 -2 21 1.1563 0.0084
8 -1 0 0.8188 -0.1127
8 -1 1 2.8098 -0.0456
8 -1 2 0.7937 0.0199
8 -1 3 -1.8543 0.0174
8 -1 4 -1.4560 0.0080
8 -1 5 1.2238 0.0243
8 -1 6 2.2987 0.0236
8 -1 7 0.3209 0.0067
8 -1 8 -2.1558 0.0116
8 -1 9 -2.9746 0.0199
8 -1 10 -2.9749 -0.0013
8 -1 11 -3.2001 -0.0225
8 -1 12 -3.0375 -0.0113
8 -1 13 -2.2464 0.0049
8 -1 14 -1.6677 -0.0005
8 -1 15 -1.4472 -0.0066
8 -1 16 -1.2510 0.0030
8 -1 17 -1.4704 0.0088
8 -1 18 -1.8325 -0.0003
8 -1 19 -0.8736 -0.0077
8 -1 20 1.1918 -0.0059
8 -1 21 2.0882 -0.0068
8 0 0 0.1577 -0.0758
8 0 1 1.4678 -0.0615
8 0 2 0.7270 0.0066
8 0 3 0.2985 0.0252
8 0 4 1.7468 0.0082
8 0 5 3.4500 0.0162
8 0 6 2.6471 0.0296
8 0 7 -0.2970 0.0171
8 0 8 -2.1058 0.0051
8 0 9 -1.3662 0.0074
8 0 10 -0.0115 -0.0014
8 0 11 0.2234 -0.0176
8 0 12 -0.3588 -0.0100
8 0 13 -1.0774 0.0125
8 0 14 -1.6617 0.0152
8 0 15 -1.9405 0.0014
8 0 16 -2.4370 -0.0005
8 0 17 -3.7414 0.0084
8 0 18 -4.5491 0.0074
8 0 19 -2.9963 -0.0023
8 0 20 -0.1494 -0.0061
8 0 21 1.1391 -0.0052
8 0 22 0.5159 -0.0067
8 1 0 -0.5374 -0.0060
8 1 1 -0.1466 -0.0511
8 1 2 0.4855 -0.0107
8 1 3 2.1215 0.0196
8 1 4 4.2576 0.0010
8 1 5 5.0652 -0.0059
8 1 6 3.0165 0.0131
8 1 7 -0.5179 0.0128
8 1 8 -2.0778 -0.0053
8 1 9 -0.3835 -0.0069
8 1 10 2.4058 -0.0003
8 1 11 3.8098 -0.0065
8 1 12 3.1883 -0.0077
8 1 13 1.4579 0.0104
8 1 14 0.2678 0.0213
8 1 15 0.2304 0.0083
8 1 16 -0.2765 -0.0032
8 1 17 -2.4448 0.0029
8 1 18 -4.1956 0.0072
8 1 19 -3.0904 -0.0013
8 1 20 -0.5234 -0.0053
8 1 21 0.4521 0.0019
8 1 22 -0.2825 0.0067
8 2 0 -0.2057 0.0668
8 2 1 -0.8138 -0.0128
8 2 2 -0.3579 -0.0134
8 2 3 1.1830 0.0162
8 2 4 2.7738 0.0012
8 2 5 3.2499 -0.0234
8 2 6 1.7209 -0.0128
8 2 7 -1.0588 -0.0013
8 2 8 -2.5765 -0.0139
8 2 9 -1.3321 -0.0162
8 2 10 1.4527 0.0033
8 2 11 3.3727 0.0093
8 2 12 3.0792 -0.0020
8 2 13 1.5061 0.0004
8 2 14 1.0416 0.0118
8 2 15 2.1754 0.0048
8 2 16 2.2211 -0.0090
8 2 17 -0.3907 -0.0052
8 2 18 -2.9092 0.0032
8 2 19 -2.3392 -0.0017
8 2 20 -0.0094 -0.0058
8 2 21 1.0117 0.0009
8 2 22 0.3959 0.0036
8 3 0 0.7560 0.1049
8 3 1 -0.1235 0.0289
8 3 2 -0.2975 -0.0089
8 3 3 0.3640 0.0091
8 3 4 1.0376 0.0069
8 3 5 1.2056 -0.0218
8 3 6 0.4052 -0.0225
8 3 7 -1.3630 -0.0041
8 3 8 -2.8032 -0.0089
8 3 9 -2.4966 -0.0172
8 3 10 -0.7427 0.0015
8 3 11 0.5816 0.0178
8 3 12 0.1319 0.0067
8 3 13 -0.9246 -0.0028
8 3 14 -0.1158 0.0038
8 3 15 2.3450 0.0010
8 3 16 3.0422 -0.0128
8 3 17 0.4225 -0.0115
8 3 18 -2.5756 0.0010
8 3 19 -2.9035 0.0046
8 3 20 -1.3027 0.0048
8 3 21 -0.0042 0.0078
8 3 22 0.4630 0.0004
8 3 23 0.5382 -0.0122
8 4 0 0.3898 0.0912
8 4 1 -0.4429 0.0514
8 4 2 -0.7875 -0.0087
8 4 3 0.1579 -0.0120
8 4 4 1.2339 0.0010
8 4 5 1.3803 -0.0135
8 4 6 0.5732 -0.0171
8 4 7 -0.6928 0.0061
8 4 8 -1.6757 0.0101
8 4 9 -1.6905 -0.0085
8 4 10 -0.9373 -0.0070
8 4 11 -0.7095 0.0092
8 4 12 -1.7669 0.0058
8 4 13 -2.6122 -0.0048
8 4 14 -1.1643 -0.0008
8 4 15 1.7178 0.0014
8 4 16 2.8980 -0.0078
8 4 17 1.3913 -0.0089
8 4 18 -0.7157 0.0008
8 4 19 -1.7874 0.0065
8 4 20 -2.1207 0.0109
8 4 21 -2.0422 0.0163
8 4 22 -1.2902 0.0091
8 4 23 -0.2864 -0.0051
8 5 0 -0.4568 0.0353
8 5 1 -1.8232 0.0501
8 5 2 -2.8873 -0.0067
8 5 3 -1.7271 -0.0314
8 5 4 0.0180 -0.0099
8 5 5 0.0673 -0.0044
8 5 6 -1.0523 -0.0086
8 5 7 -1.4205 0.0109
8 5 8 -0.7207 0.0229
8 5 9 -0.0001 0.0032
8 5 10 0.0685 -0.0107
8 5 11 -0.7329 -0.0022
8 5 12 -2.1801 -0.0008
8 5 13 -2.9184 -0.0113
8 5 14 -1.8192 -0.0115
8 5 15 0.0088 -0.0038
8 5 16 0.9002 -0.0007
8 5 17 1.2374 0.0022
8 5 18 1.8661 0.0042
8 5 19 1.8795 -0.0013
8 5 20 0.5077 -0.0036
8 5 21 -0.9736 0.0047
8 5 22 -1.2534 0.0086
8 5 23 -0.8739 0.0043
8 6 0 0.9118 -0.0361
8 6 1 -1.0311 0.0267
8 6 2 -3.3721 -0.0019
8 6 3 -3.2765 -0.0338
8 6 4 -2.1897 -0.0096
8 6 5 -3.1722 0.0122
8 6 6 -5.0263 0.0035
8 6 7 -4.2463 0.0045
8 6 8 -1.2406 0.0155
8 6 9 0.5490 0.0074
8 6 10 0.0398 -0.0053
8 6 11 -1.2882 -0.0014
8 6 12 -2.3688 0.0013
8 6 13 -2.7634 -0.0097
8 6 14 -2.4302 -0.0170
8 6 15 -2.3206 -0.0106
8 6 16 -2.6366 0.0017
8 6 17 -1.7211 0.0116
8 6 18 0.7448 0.0097
8 6 19 2.3307 -0.0065
8 6 20 1.8541 -0.0180
8 6 21 1.1279 -0.0099
8 6 22 1.2899 0.0030
8 7 0 3.5890 -0.0830
8 7 1 1.9271 -0.0059
8 7 2 -0.8932 -0.0004
8 7 3 -1.7400 -0.0257
8 7 4 -1.1451 -0.0054
8 7 5 -2.7134 0.0242
8 7 6 -5.3580 0.0135
8 7 7 -4.4139 -0.0063
8 7 8 -0.5849 -0.0035
8 7 9 1.0500 0.0035
8 7 10 -0.2733 0.0021
8 7 11 -1.3570 0.0029
8 7 12 -1.3546 0.0047
8 7 13 -1.3983 -0.0006
8 7 14 -1.5808 -0.0076
8 7 15 -1.9855 -0.0071
8 7 16 -2.8109 0.0015
8 7 17 -2.9007 0.0107
8 7 18 -1.8185 0.0094
8 7 19 -1.2938 -0.0049
8 7 20 -1.7126 -0.0150
8 7 21 -0.9684 -0.0045
8 7 22 1.3223 0.0136
8 8 0 3.9365 -0.0798
8 8 1 3.7760 -0.0256
8 8 2 1.6265 0.0039
8 8 3 0.6675 -0.0094
8 8 4 2.1063 -0.0053
8 8 5 1.7658 0.0168
8 8 6 -0.7283 0.0107
8 8 7 -0.3415 -0.0146
8 8 8 2.6776 -0.0178
8 8 9 2.9118 -0.0007
8 8 10 0.6144 0.0067
8 8 11 0.2490 0.0002
8 8 12 1.2551 -0.0031
8 8 13 0.7523 0.0012
8 8 14 0.0646 0.0035
8 8 15 0.9226 0.0002
8 8 16 1.6067 -0.0022
8 8 17 0.9033 0.0004
8 8 18 -0.3445 0.0033
8 8 19 -2.0394 0.0001
8 8 20 -3.8974 -0.0040
8 8 21 -3.9097 0.0041
8 9 0 0.5661 -0.0437
8 9 1 3.5998 -0.0295
8 9 2 3.1779 0.0129
8 9 3 2.1296 0.0150
8 9 4 3.9512 -0.0023
8 9 5 4.5409 -0.0001
8 9 6 2.0592 0.0038
8 9 7 1.7996 -0.0098
8 9 8 4.2407 -0.0156
8 9 9 3.7515 -0.0004
8 9 10 1.1944 0.0080
8 9 11 1.7062 -0.0042
8 9 12 2.9913 -0.0120
8 9 13 0.7601 -0.0017
8 9 14 -1.3140 0.0078
8 9 15 0.7957 0.0023
8 9 16 3.4335 -0.0082
8 9 17 2.9865 -0.0095
8 9 18 1.5263 0.0014
8 9 19 0.7665 0.0128
8 9 20 -0.4046 0.0111
8 9 21 -1.7045 0.0044
8 10 0 -4.2339 -0.0052
8 10 1 2.5297 -0.0281
8 10 2 4.5385 0.0132
8 10 3 3.5626 0.0307
8 10 4 4.6489 0.0007
8 10 5 4.3342 -0.0148
8 10 6 0.4789 0.0016
8 10 7 -0.7706 0.0089
8 10 8 1.7550 0.0008
8 10 9 1.6743 0.0020
8 10 10 -0.3817 0.0055
8 10 11 1.0589 -0.0040
8 10 12 2.3850 -0.0100
8 10 13 -1.8647 -0.0005
8 10 14 -6.1151 0.0076
8 10 15 -4.3547 0.0032
8 10 16 -1.5000 -0.0059
8 10 17 -2.2096 -0.0087
8 10 18 -2.3940 0.0046
8 10 19 0.6040 0.0269
8 11 0 -6.2024 0.0310
8 11 1 1.5095 -0.0162
8 11 2 4.2730 0.0046
8 11 3 3.1620 0.0281
8 11 4 3.6861 -0.0004
8 11 5 2.9530 -0.0256
8 11 6 -1.1261 -0.0050
8 11 7 -2.2210 0.0175
8 11 8 0.7301 0.0101
8 11 9 0.5768 -0.0005
8 11 10 -2.0012 0.0003
8 11 11 -0.5701 0.0003
8 11 12 0.9720 -0.0019
8 11 13 -4.0269 -0.0030
8 11 14 -9.6591 -0.0044
8 11 15 -8.8705 -0.0006
8 11 16 -6.8238 0.0050
8 11 17 -8.1501 0.0005
8 11 18 -7.3632 -0.0006
8 12 2 2.2651 -0.0022
8 12 3 -0.8455 0.0188
8 12 4 -1.4730 0.0070
8 12 5 -1.2483 -0.0204
8 12 6 -2.2034 -0.0150
8 12 7 0.2320 0.0031
8 12 8 5.2199 0.0001
8 12 9 4.7203 -0.0089
8 12 10 -0.0433 -0.0039
8 12 11 -0.7654 0.0073
8 12 12 0.1496 0.0084
8 12 13 -4.2868 -0.0086
8 12 14 -9.2489 -0.0269
8 12 15 -8.0616 -0.0161
9 -12 0 1.0710 -0.1080
9 -11 0 -3.6469 -0.0957
9 -11 1 -1.2069 -0.0573
9 -11 2 2.0104 0.0042
9 -11 3 3.6471 -0.0001
9 -11 4 3.1088 -0.0270
9 -11 5 1.4077 -0.0078
9 -11 6 -0.2489 0.0211
9 -10 0 -4.1239 -0.0359
9 -10 1 -3.3063 -0.0501
9 -10 2 -1.2469 -0.0039
9 -10 3 0.2708 0.0179
9 -10 4 1.0680 -0.0025
9 -10 5 0.6737 0.0005
9 -10 6 -0.8316 0.0276
9 -10 7 -2.2181 0.0223
9 -10 8 -3.3568 -0.0069
9 -10 9 -4.5671 -0.0109
9 -9 0 -1.1970 0.0303
9 -9 1 -1.2515 -0.0271
9 -9 2 -1.6568 -0.0103
9 -9 3 -2.3968 0.0278
9 -9 4 -1.7671 0.0137
9 -9 5 -0.5466 -0.0089
9 -9 6 -0.1055 0.0083
9 -9 7 0.0013 0.0216
9 -9 8 -0.6543 0.0021
9 -9 9 -2.8003 -0.0085
9 -9 10 -3.5298 0.0057
9 -9 11 -0.2085 0.0129
9 -8 0 0.7186 0.0867
9 -8 1 1.6534 0.0111
9 -8 2 0.1033 -0.0125
9 -8 3 -2.7704 0.0200
9 -8 4 -3.5746 0.0145
9 -8 5 -2.2005 -0.0237
9 -8 6 -0.3291 -0.0203
9 -8 7 1.5102 0.0063
9 -8 8 1.9920 -0.0008
9 -8 9 0.1336 -0.0161
9 -8 10 -0.8198 -0.0006
9 -8 11 1.8785 0.0155
9 -8 12 4.0610 0.0073
9 -8 13 1.2261 0.0003
9 -7 0 1.0215 0.1122
9 -7 1 2.4461 0.0561
9 -7 2 1.1534 -0.0039
9 -7 3 -1.7064 0.0023
9 -7 4 -2.9848 0.0086
9 -7 5 -2.1344 -0.0211
9 -7 6 -0.4137 -0.0252
9 -7 7 1.3874 0.0027
9 -7 8 1.9387 -0.0006
9 -7 9 0.8480 -0.0250
9 -7 10 1.1447 -0.0138
9 -7 11 4.2234 0.0146
9 -7 12 5.3876 0.0114
9 -7 13 1.3989 -0.0083
9 -7 14 -3.0224 -0.0121
9 -6 0 1.1329 0.0866
9 -6 1 1.2949 0.0785
9 -6 2 0.3686 0.0046
9 -6 3 -0.9330 -0.0212
9 -6 4 -1.0749 -0.0045
9 -6 5 0.0645 -0.0083
9 -6 6 1.3779 -0.0112
9 -6 7 1.8062 0.0109
9 -6 8 0.5791 0.0119
9 -6 9 -1.1335 -0.0172
9 -6 10 -0.0723 -0.0207
9 -6 11 3.6844 0.0047
9 -6 12 4.9227 0.0094
9 -6 13 1.4997 -0.0068
9 -6 14 -1.5735 -0.0077
9 -6 15 -0.6479 0.0037
9 -6 16 1.1397 0.0047
9 -5 0 0.8519 0.0206
9 -5 1 0.0268 0.0633
9 -5 2 -0.3665 0.0079
9 -5 3 -0.4833 -0.0366
9 -5 4 -0.0290 -0.0164
9 -5 5 1.3372 0.0033
9 -5 6 2.8235 -0.0004
9 -5 7 2.6752 0.0083
9 -5 8 0.0382 0.0177
9 -5 9 -2.8068 0.0012
9 -5 10 -2.2353 -0.0127
9 -5 11 1.0074 -0.0033
9 -5 12 1.9294 -0.0002
9 -5 13 -0.7242 -0.0126
9 -5 14 -2.3762 -0.0107
9 -5 15 -0.5757 0.0091
9 -5 16 1.5628 0.0161
9 -5 17 1.4805 0.0006
9 -4 0 -0.1332 -0.0571
9 -4 1 0.1340 0.0170
9 -4 2 1.0894 0.0068
9 -4 3 1.1090 -0.0322
9 -4 4 0.3491 -0.0154
9 -4 5 0.5633 0.0159
9 -4 6 1.8604 0.0080
9 -4 7 1.9930 -0.0039
9 -4 8 -0.3990 0.0077
9 -4 9 -3.0357 0.0126
9 -4 10 -2.6453 0.0018
9 -4 11 -0.2331 -0.0008
9 -4 12 -0.0082 0.0003
9 -4 13 -2.5636 -0.0111
9 -4 14 -4.0138 -0.0181
9 -4 15 -2.5163 -0.0030
9 -4 16 -0.4228 0.0137
9 -4 17 0.2718 0.0073
9 -4 18 0.0694 -0.0106
9 -3 0 -0.7610 -0.1133
9 -3 1 1.2593 -0.0383
9 -3 2 3.1049 0.0006
9 -3 3 2.5059 -0.0170
9 -3 4 0.5228 -0.0106
9 -3 5 -0.0186 0.0203
9 -3 6 1.0153 0.0149
9 -3 7 0.9900 -0.0109
9 -3 8 -1.3199 -0.0059
9 -3 9 -3.5722 0.0127
9 -3 10 -2.9732 0.0101
9 -3 11 -0.4962 0.0023
9 -3 12 0.3781 0.0062
9 -3 13 -1.1434 0.0031
9 -3 14 -2.4521 -0.0097
9 -3 15 -1.9535 -0.0072
9 -3 16 -0.7454 0.0101
9 -3 17 -0.1590 0.0129
9 -3 18 -0.4492 -0.0017
9 -3 19 -1.2150 -0.0068
9 -2 0 0.0089 -0.1140
9 -2 1 2.1676 -0.0687
9 -2 2 2.5777 -0.0023
9 -2 3 0.5415 0.0019
9 -2 4 -1.1522 -0.0085
9 -2 5 -0.0154 0.0097
9 -2 6 2.2311 0.0129
9 -2 7 2.0561 -0.0123
9 -2 8 -1.0841 -0.0165
9 -2 9 -4.2828 0.0051
9 -2 10 -4.7136 0.0101
9 -2 11 -2.5558 -0.0005
9 -2 12 -0.3070 0.0024
9 -2 13 0.4048 0.0096
9 -2 14 0.2450 0.0029
9 -2 15 0.3901 -0.0004
9 -2 16 0.9339 0.0118
9 -2 17 1.2734 0.0166
9 -2 18 0.8590 0.0028
9 -2 19 -0.2399 -0.0051
9 -2 20 -1.0902 0.0037
9 -1 0 1.6651 -0.0547
9 -1 1 2.5443 -0.0576
9 -1 2 0.4171 0.0029
9 -1 3 -2.9972 0.0231
9 -1 4 -3.6931 0.0012
9 -1 5 -0.3735 0.0015
9 -1 6 3.3307 0.0117
9 -1 7 3.5425 -0.0052
9 -1 8 0.5108 -0.0207
9 -1 9 -2.9704 -0.0071
9 -1 10 -4.7133 0.0053
9 -1 11 -4.0698 -0.0019
9 -1 12 -2.0312 -0.0039
9 -1 13 -0.4741 0.0060
9 -1 14 -0.1808 0.0074
9 -1 15 -0.2959 0.0020
9 -1 16 0.0239 0.0058
9 -1 17 0.5866 0.0103
9 -1 18 0.8519 0.0027
9 -1 19 0.7457 -0.0052
9 -1 20 0.6130 -0.0031
9 0 0 2.5157 0.0280
9 0 1 2.1129 -0.0223
9 0 2 -0.7347 0.0032
9 0 3 -3.4671 0.0303
9 0 4 -3.0805 0.0124
9 0 5 0.2766 0.0023
9 0 6 2.9686 0.0180
9 0 7 2.7524 0.0140
9 0 8 1.1224 -0.0105
9 0 9 -0.1591 -0.0139
9 0 10 -0.9619 0.0003
9 0 11 -1.0340 0.0015
9 0 12 -0.2632 -0.0038
9 0 13 -0.0135 0.0033
9 0 14 -1.1987 0.0108
9 0 15 -2.6126 0.0041
9 0 16 -3.0215 -0.0049
9 0 17 -2.7367 -0.0042
9 0 18 -2.1850 -0.0006
9 0 19 -1.1566 -0.0003
9 0 20 0.1250 -0.0017
9 0 21 0.9203 -0.0060
9 1 0 1.9833 0.0920
9 1 1 0.5510 0.0167
9 1 2 -1.3328 -0.0050
9 1 3 -1.7733 0.0148
9 1 4 -0.1856 0.0089
9 1 5 1.9734 -0.0048
9 1 6 2.2135 0.0113
9 1 7 0.5970 0.0245
9 1 8 -0.1040 0.0064
9 1 9 1.0731 -0.0083
9 1 10 2.4719 0.0020
9 1 11 3.4124 0.0080
9 1 12 4.1406 -0.0025
9 1 13 3.5682 -0.0038
9 1 14 1.1460 0.0082
9 1 15 -1.3387 0.0077
9 1 16 -2.6082 -0.0068
9 1 17 -3.4233 -0.0117
9 1 18 -3.9493 -0.0027
9 1 19 -3.1614 0.0033
9 1 20 -1.3598 0.0024
9 1 21 -0.1336 0.0021
9 2 0 1.3878 0.1116
9 2 1 -0.7006 0.0487
9 2 2 -2.2443 -0.0073
9 2 3 -1.7459 -0.0041
9 2 4 0.2127 0.0006
9 2 5 1.7790 -0.0166
9 2 6 1.1831 -0.0134
9 2 7 -0.8095 0.0094
9 2 8 -1.4209 0.0115
9 2 9 0.0242 0.0011
9 2 10 1.7811 0.0090
9 2 11 3.2654 0.0171
9 2 12 4.7395 0.0009
9 2 13 5.0288 -0.0143
9 2 14 3.5914 -0.0055
9 2 15 2.1136 0.0034
9 2 16 1.2596 -0.0048
9 2 17 -0.3103 -0.0092
9 2 18 -2.2726 0.0000
9 2 19 -2.4561 0.0043
9 2 20 -0.8374 0.0004
9 2 21 0.3314 0.0033
9 2 22 0.1194 0.0100
9 3 0 1.3584 0.0787
9 3 1 -0.3843 0.0578
9 3 2 -2.4561 -0.0037
9 3 3 -2.8050 -0.0151
9 3 4 -1.3755 0.0002
9 3 5 0.1891 -0.0134
9 3 6 0.1696 -0.0285
9 3 7 -1.0255 -0.0105
9 3 8 -1.4470 0.0085
9 3 9 -0.8335 0.0061
9 3 10 -0.4412 0.0087
9 3 11 -0.1123 0.0184
9 3 12 0.8862 0.0074
9 3 13 1.7168 -0.0130
9 3 14 1.9217 -0.0120
9 3 15 2.5646 -0.0014
9 3 16 3.2025 -0.0034
9 3 17 1.8577 -0.0048
9 3 18 -0.7709 0.0045
9 3 19 -1.6243 0.0075
9 3 20 -0.1610 0.0016
9 3 21 1.2272 0.0023
9 3 22 1.2205 0.0046
9 4 0 1.1437 0.0106
9 4 1 0.0436 0.0377
9 4 2 -2.5174 -0.0038
9 4 3 -3.2191 -0.0246
9 4 4 -1.3512 -0.0022
9 4 5 0.5700 -0.0011
9 4 6 0.4206 -0.0223
9 4 7 -0.7175 -0.0129
9 4 8 -0.6976 0.0132
9 4 9 0.0617 0.0110
9 4 10 -0.1790 -0.0025
9 4 11 -1.1394 0.0011
9 4 12 -1.5973 0.0036
9 4 13 -1.6560 -0.0055
9 4 14 -1.3027 -0.0059
9 4 15 0.2052 0.0023
9 4 16 1.8012 0.0022
9 4 17 1.2434 0.0012
9 4 18 -0.9391 0.0080
9 4 19 -1.9703 0.0098
9 4 20 -1.1372 0.0050
9 4 21 -0.0789 0.0060
9 4 22 0.3964 0.0046
9 5 0 1.2615 -0.0575
9 5 1 -0.3024 0.0051
9 5 2 -3.7568 -0.0006
9 5 3 -4.1143 -0.0248
9 5 4 -0.7766 -0.0068
9 5 5 1.5906 0.0085
9 5 6 0.2556 -0.0071
9 5 7 -1.7161 -0.0050
9 5 8 -0.8616 0.0198
9 5 9 1.3255 0.0162
9 5 10 1.6648 -0.0119
9 5 11 0.2830 -0.0196
9 5 12 -1.0582 -0.0096
9 5 13 -2.0668 -0.0069
9 5 14 -2.6285 -0.0060
9 5 15 -1.9596 0.0009
9 5 16 -0.6542 0.0051
9 5 17 -0.3039 0.0074
9 5 18 -0.8112 0.0106
9 5 19 -0.9651 0.0062
9 5 20 -0.8553 -0.0022
9 5 21 -1.1709 0.0001
9 5 22 -1.3768 0.0056
9 6 0 2.8858 -0.0968
9 6 1 0.1665 -0.0234
9 6 2 -4.5051 0.0086
9 6 3 -5.1902 -0.0087
9 6 4 -1.5141 -0.0010
9 6 5 0.3179 0.0209
9 6 6 -2.6122 0.0135
9 6 7 -5.1762 0.0044
9 6 8 -2.8555 0.0163
9 6 9 1.1589 0.0141
9 6 10 2.0455 -0.0100
9 6 11 0.4499 -0.0197
9 6 12 -0.8811 -0.0105
9 6 13 -1.8840 -0.0069
9 6 14 -3.1088 -0.0096
9 6 15 -3.6706 -0.0065
9 6 16 -3.1982 0.0002
9 6 17 -2.2763 0.0065
9 6 18 -0.9619 0.0091
9 6 19 0.5328 -0.0000
9 6 20 1.0340 -0.0142
9 6 21 0.1722 -0.0134
9 7 0 4.7405 -0.0894
9 7 1 1.4270 -0.0392
9 7 2 -3.2519 0.0102
9 7 3 -4.3127 0.0048
9 7 4 -1.3294 0.0037
9 7 5 -0.4607 0.0270
9 7 6 -4.6719 0.0303
9 7 7 -7.8232 0.0124
9 7 8 -4.7360 0.0050
9 7 9 0.1424 0.0051
9 7 10 0.9355 -0.0006
9 7 11 -0.7818 -0.0027
9 7 12 -1.4575 0.0017
9 7 13 -1.8909 0.0023
9 7 14 -3.3506 -0.0003
9 7 15 -4.3897 -0.0001
9 7 16 -4.1034 0.0008
9 7 17 -3.2423 0.0016
9 7 18 -1.9967 0.0025
9 7 19 -0.4309 -0.0034
9 7 20 0.4700 -0.0148
9 7 21 0.4639 -0.0145
9 8 0 4.2923 -0.0363
9 8 1 1.3329 -0.0335
9 8 2 -1.6790 0.0039
9 8 3 -2.1941 0.0055
9 8 4 0.8909 -0.0058
9 8 5 2.4962 0.0084
9 8 6 -1.4692 0.0211
9 8 7 -5.5844 0.0073
9 8 8 -3.7091 -0.0091
9 8 9 0.2252 -0.0051
9 8 10 0.3506 0.0073
9 8 11 -1.0841 0.0104
9 8 12 -0.6264 0.0051
9 8 13 -0.4923 0.0034
9 8 14 -2.0679 0.0096
9 8 15 -2.4466 0.0141
9 8 16 -0.8719 0.0077
9 8 17 -0.0800 -0.0025
9 8 18 -0.8123 -0.0043
9 8 19 -1.5393 -0.0012
9 8 20 -1.8296 -0.0042
9 9 0 0.7746 0.0270
9 9 1 -0.2971 -0.0132
9 9 2 -0.6056 0.0003
9 9 3 -0.4298 0.0076
9 9 4 2.9771 -0.0121
9 9 5 6.4011 -0.0184
9 9 6 3.8905 -0.0057
9 9 7 -0.9680 -0.0069
9 9 8 -0.8894 -0.0199
9 9 9 1.6360 -0.0138
9 9 10 0.9930 0.0066
9 9 11 -0.3077 0.0103
9 9 12 0.7845 -0.0025
9 9 13 0.7574 -0.0054
9 9 14 -1.3185 0.0064
9 9 15 -0.5495 0.0132
9 9 16 3.3179 0.0039
9 9 17 4.7469 -0.0091
9 9 18 2.4480 -0.0076
9 9 19 0.0065 0.0066
9 10 0 -4.4260 0.0590
9 10 1 -2.0771 0.0006
9 10 2 0.8923 -0.0050
9 10 3 1.4598 0.0104
9 10 4 4.0439 -0.0064
9 10 5 7.7224 -0.0276
9 10 6 5.6964 -0.0184
9 10 7 0.4028 -0.0060
9 10 8 0.0368 -0.0129
9 10 9 2.6753 -0.0147
9 10 10 2.0144 -0.0021
9 10 11 0.4504 0.0014
9 10 12 1.0281 -0.0058
9 10 13 -0.4921 -0.0041
9 10 14 -4.3806 0.0044
9 10 15 -3.6828 0.0057
9 10 16 1.7054 -0.0011
9 10 17 4.0627 -0.0084
9 10 18 1.9957 -0.0046
9 11 1 -3.2249 0.0098
9 11 2 1.7842 -0.0118
9 11 3 2.4454 0.0023
9 11 4 3.7462 -0.0040
9 11 5 6.3630 -0.0244
9 11 6 3.9438 -0.0156
9 11 7 -1.2230 0.0067
9 11 8 -0.7933 0.0067
9 11 9 2.8637 -0.0048
9 11 10 2.6259 -0.0081
9 11 11 0.9877 -0.0074
9 11 12 1.0736 -0.0030
9 11 13 -2.2377 0.0051
9 11 14 -9.0248 0.0057
9 11 15 -10.3603 0.0041
9 11 16 -5.2491 0.0126
9 12 6 1.1330 -0.0099
9 12 7 -1.7843 0.0046
9 12 8 0.2342 0.0095
9 12 9 4.0152 0.0029
9 12 10 3.1631 -0.0049
9 12 11 1.3680 -0.0071
9 12 12 1.7906 0.0016
10 -11 0 -0.6837 -0.0265
10 -11 1 -0.7999 -0.0780
10 -11 2 0.9175 -0.0323
10 -10 0 -5.6633 0.0522
10 -10 1 -7.0566 -0.0212
10 -10 2 -4.6510 -0.0292
10 -10 3 -1.6007 0.0107
10 -10 4 0.3928 0.0158
10 -10 5 1.1806 -0.0045
10 -10 6 0.2989 -0.0029
10 -9 0 -4.8734 0.1003
10 -9 1 -7.2369 0.0340
10 -9 2 -6.4495 -0.0158
10 -9 3 -5.7356 0.0005
10 -9 4 -4.5944 0.0150
10 -9 5 -2.0710 -0.0040
10 -9 6 -0.4672 -0.0086
10 -9 7 -0.8862 0.0083
10 -9 8 -1.6293 0.0089
10 -9 9 -2.3448 -0.0012
10 -8 0 -1.4890 0.0947
10 -8 1 -1.4291 0.0620
10 -8 2 -1.5525 -0.0053
10 -8 3 -4.4979 -0.0132
10 -8 4 -6.5121 0.0058
10 -8 5 -4.2092 -0.0119
10 -8 6 -0.4728 -0.0294
10 -8 7 1.2977 -0.0078
10 -8 8 1.3221 0.0096
10 -8 9 0.1152 -0.0027
10 -8 10 -1.3596 -0.0077
10 -8 11 -0.1768 0.0070
10 -7 0 -0.6383 0.0450
10 -7 1 2.7848 0.0652
10 -7 2 3.5684 0.0091
10 -7 3 -0.5904 -0.0195
10 -7 4 -4.6008 -0.0013
10 -7 5 -3.6479 -0.0098
10 -7 6 0.1014 -0.0355
10 -7 7 2.5956 -0.0204
10 -7 8 3.1019 0.0053
10 -7 9 2.3885 -0.0070
10 -7 10 1.9902 -0.0217
10 -7 11 3.8014 -0.0040
10 -7 12 5.6426 0.0131
10 -7 13 2.7386 0.0045
10 -6 0 -1.3290 -0.0294
10 -6 1 1.9824 0.0414
10 -6 2 3.1808 0.0198
10 -6 3 0.7345 -0.0180
10 -6 4 -1.7516 -0.0041
10 -6 5 -0.7083 0.0046
10 -6 6 2.1779 -0.0160
10 -6 7 3.3852 -0.0105
10 -6 8 2.3327 0.0141
10 -6 9 0.9455 0.0023
10 -6 10 1.9034 -0.0240
10 -6 11 5.8594 -0.0138
10 -6 12 8.3504 0.0097
10 -6 13 4.8001 0.0061
10 -6 14 -1.0923 -0.0110
10 -6 15 -2.2186 -0.0164
10 -5 0 -0.6535 -0.0910
10 -5 1 -0.1744 -0.0014
10 -5 2 0.1699 0.0185
10 -5 3 -0.2322 -0.0121
10 -5 4 -0.3195 -0.0056
10 -5 5 1.5365 0.0160
10 -5 6 4.1177 0.0067
10 -5 7 4.3992 0.0027
10 -5 8 1.5330 0.0224
10 -5 9 -1.7745 0.0187
10 -5 10 -1.3823 -0.0117
10 -5 11 3.2431 -0.0188
10 -5 12 6.4306 -0.0010
10 -5 13 3.6651 0.0045
10 -5 14 -0.3860 -0.0035
10 -5 15 1.0233 -0.0036
10 -5 16 5.3018 0.0037
10 -4 0 0.3018 -0.1078
10 -4 1 -0.4950 -0.0409
10 -4 2 0.1017 0.0108
10 -4 3 0.8293 0.0019
10 -4 4 0.6999 0.0001
10 -4 5 1.2861 0.0217
10 -4 6 3.1528 0.0204
10 -4 7 3.8435 0.0059
10 -4 8 1.3363 0.0139
10 -4 9 -2.4435 0.0210
10 -4 10 -3.0420 0.0012
10 -4 11 0.4993 -0.0161
10 -4 12 2.8029 -0.0090
10 -4 13 -0.2513 -0.0005
10 -4 14 -3.8888 -0.0046
10 -4 15 -1.6066 -0.0049
10 -4 16 3.9799 0.0063
10 -4 17 5.9629 0.0132
10 -3 0 -0.2457 -0.0792
10 -3 1 0.0189 -0.0619
10 -3 2 2.3325 -0.0001
10 -3 3 3.6080 0.0159
10 -3 4 1.9775 0.0062
10 -3 5 0.3260 0.0172
10 -3 6 1.0212 0.0232
10 -3 7 1.9527 0.0063
10 -3 8 0.3272 -0.0002
10 -3 9 -2.7315 0.0100
10 -3 10 -3.2528 0.0063
10 -3 11 -0.0740 -0.0081
10 -3 12 2.2104 -0.0064
10 -3 13 -0.5663 0.0037
10 -3 14 -4.8593 -0.0005
10 -3 15 -4.4672 -0.0082
10 -3 16 -0.3117 0.0009
10 -3 17 2.1254 0.0142
10 -3 18 1.6072 0.0084
10 -2 0 -0.5356 -0.0197
10 -2 1 0.3044 -0.0550
10 -2 2 2.5284 -0.0101
10 -2 3 2.9409 0.0186
10 -2 4 0.7835 0.0003
10 -2 5 -0.2237 -0.0065
10 -2 6 1.4750 0.0064
10 -2 7 2.4725 0.0015
10 -2 8 0.0495 -0.0109
10 -2 9 -3.8889 -0.0035
10 -2 10 -5.1875 0.0065
10 -2 11 -2.1478 0.0015
10 -2 12 1.8598 0.0002
10 -2 13 2.1022 0.0091
10 -2 14 -0.7783 0.0082
10 -2 15 -2.0316 -0.0010
10 -2 16 -0.5201 0.0041
10 -2 17 0.7092 0.0162
10 -2 18 0.3132 0.0099
10 -2 19 -0.6791 -0.0069
10 -1 0 1.2587 0.0501
10 -1 1 1.1509 -0.0190
10 -1 2 0.4373 -0.0103
10 -1 3 -1.7024 0.0156
10 -1 4 -3.5150 -0.0063
10 -1 5 -1.3736 -0.0304
10 -1 6 3.5274 -0.0178
10 -1 7 5.5353 -0.0076
10 -1 8 2.3852 -0.0189
10 -1 9 -2.8177 -0.0181
10 -1 10 -5.9986 0.0008
10 -1 11 -4.9770 0.0096
10 -1 12 -0.9322 0.0068
10 -1 13 2.0178 0.0075
10 -1 14 1.7523 0.0069
10 -1 15 0.6753 0.0013
10 -1 16 0.9960 0.0039
10 -1 17 1.7171 0.0120
10 -1 18 1.6864 0.0074
10 -1 19 1.0249 -0.0048
10 0 0 3.3324 0.0965
10 0 1 2.0333 0.0250
10 0 2 -1.1478 -0.0041
10 0 3 -4.7857 0.0099
10 0 4 -6.0492 -0.0032
10 0 5 -2.2543 -0.0302
10 0 6 3.7890 -0.0216
10 0 7 6.2376 -0.0026
10 0 8 4.2063 -0.0132
10 0 9 1.0206 -0.0262
10 0 10 -1.4698 -0.0102
10 0 11 -2.4630 0.0112
10 0 12 -1.1072 0.0124
10 0 13 0.8690 0.0048
10 0 14 0.7544 0.0006
10 0 15 -0.6481 -0.0034
10 0 16 -0.8805 -0.0066
10 0 17 0.0791 -0.0053
10 0 18 1.0758 -0.0031
10 0 19 1.6999 -0.0006
10 0 20 1.3950 0.0040
10 1 0 3.4997 0.0944
10 1 1 1.2866 0.0517
10 1 2 -1.8508 0.0000
10 1 3 -4.1151 -0.0034
10 1 4 -4.2659 -0.0014
10 1 5 -1.2986 -0.0161
10 1 6 2.2751 -0.0103
10 1 7 2.8893 0.0124
10 1 8 2.0251 0.0073
10 1 9 2.9000 -0.0166
10 1 10 4.2528 -0.0143
10 1 11 4.0110 0.0077
10 1 12 3.5270 0.0118
10 1 13 3.4033 -0.0008
10 1 14 1.7881 -0.0055
10 1 15 -1.0155 -0.0038
10 1 16 -2.5591 -0.0091
10 1 17 -2.4347 -0.0160
10 1 18 -1.7004 -0.0119
10 1 19 -0.5969 0.0013
10 1 20 0.3398 0.0113
10 2 0 2.2259 0.0485
10 2 1 -0.3554 0.0549
10 2 2 -2.5342 0.0057
10 2 3 -3.0657 -0.0149
10 2 4 -2.3296 -0.0031
10 2 5 -0.4138 -0.0029
10 2 6 0.8124 -0.0047
10 2 7 -0.5095 0.0113
10 2 8 -1.5369 0.0180
10 2 9 1.0670 0.0012
10 2 10 4.7685 -0.0055
10 2 11 5.9367 0.0078
10 2 12 5.7300 0.0077
10 2 13 5.7715 -0.0109
10 2 14 4.7005 -0.0161
10 2 15 2.2754 -0.0042
10 2 16 0.3536 -0.0006
10 2 17 -0.7826 -0.0077
10 2 18 -1.8024 -0.0069
10 2 19 -1.9343 0.0022
10 2 20 -0.9336 0.0076
10 2 21 -0.3048 0.0088
10 3 0 0.3539 -0.0163
10 3 1 -1.0810 0.0356
10 3 2 -2.6805 0.0112
10 3 3 -3.5106 -0.0167
10 3 4 -3.1980 0.0003
10 3 5 -1.3990 0.0146
10 3 6 0.0097 0.0008
10 3 7 -1.0461 -0.0035
10 3 8 -2.2206 0.0097
10 3 9 -0.4338 0.0112
10 3 10 2.1731 0.0051
10 3 11 2.4817 0.0096
10 3 12 1.9811 0.0075
10 3 13 2.7207 -0.0114
10 3 14 3.5372 -0.0192
10 3 15 3.5468 -0.0050
10 3 16 3.4260 0.0060
10 3 17 2.5990 0.0044
10 3 18 0.4862 0.0040
10 3 19 -1.0075 0.0046
10 3 20 -0.4362 -0.0003
10 3 21 0.5670 -0.0015
10 4 0 -1.5883 -0.0695
10 4 1 -1.0973 -0.0006
10 4 2 -2.4966 0.0063
10 4 3 -4.4122 -0.0175
10 4 4 -4.4240 0.0009
10 4 5 -1.9586 0.0282
10 4 6 0.1769 0.0108
10 4 7 -0.2851 -0.0121
10 4 8 -1.0656 0.0009
10 4 9 0.3811 0.0159
10 4 10 1.8678 0.0081
10 4 11 0.8156 0.0018
10 4 12 -1.0009 0.0039
10 4 13 -1.3120 -0.0011
10 4 14 -0.6861 -0.0051
10 4 15 0.3180 0.0032
10 4 16 1.8521 0.0105
10 4 17 2.4073 0.0096
10 4 18 0.8039 0.0090
10 4 19 -0.8680 0.0054
10 4 20 -0.3942 -0.0047
10 4 21 0.9974 -0.0086
10 5 0 -1.3952 -0.0875
10 5 1 -0.5235 -0.0341
10 5 2 -2.8609 -0.0019
10 5 3 -5.3248 -0.0146
10 5 4 -4.1118 -0.0044
10 5 5 -0.4580 0.0236
10 5 6 0.9489 0.0106
10 5 7 -0.8934 -0.0166
10 5 8 -1.7542 -0.0039
10 5 9 0.6239 0.0177
10 5 10 2.9110 0.0055
10 5 11 2.2957 -0.0127
10 5 12 0.4275 -0.0080
10 5 13 -0.9093 0.0027
10 5 14 -2.1101 0.0060
10 5 15 -2.7160 0.0088
10 5 16 -1.6946 0.0104
10 5 17 -0.4565 0.0091
10 5 18 -0.8555 0.0089
10 5 19 -1.7282 0.0040
10 5 20 -1.1766 -0.0078
10 5 21 0.0536 -0.0120
10 6 0 2.1749 -0.0665
10 6 1 1.6104 -0.0472
10 6 2 -2.8173 -0.0004
10 6 3 -5.7630 0.0034
10 6 4 -3.1761 0.0007
10 6 5 1.0960 0.0151
10 6 6 0.7047 0.0061
10 6 7 -3.3731 -0.0182
10 6 8 -4.5131 -0.0109
10 6 9 -1.0673 0.0091
10 6 10 2.0099 0.0001
10 6 11 2.0359 -0.0175
10 6 12 1.2258 -0.0122
10 6 13 0.5360 0.0011
10 6 14 -1.4144 0.0035
10 6 15 -3.6963 0.0013
10 6 16 -3.9186 0.0006
10 6 17 -2.6032 0.0011
10 6 18 -1.8218 0.0030
10 6 19 -1.5008 0.0003
10 6 20 -0.6755 -0.0101
10 7 0 5.9036 -0.0170
10 7 1 3.5839 -0.0373
10 7 2 -2.0581 0.0030
10 7 3 -5.0218 0.0202
10 7 4 -2.1145 0.0109
10 7 5 1.6442 0.0132
10 7 6 -0.3266 0.0124
10 7 7 -5.6974 -0.0039
10 7 8 -6.6679 -0.0101
10 7 9 -2.5419 -0.0031
10 7 10 0.2930 -0.0038
10 7 11 -0.2556 -0.0071
10 7 12 -0.6703 -0.0003
10 7 13 -0.4305 0.0064
10 7 14 -2.1414 0.0048
10 7 15 -4.8033 0.0019
10 7 16 -5.1307 -0.0010
10 7 17 -3.3444 -0.0060
10 7 18 -1.8124 -0.0080
10 7 19 -0.8469 -0.0065
10 7 20 0.2263 -0.0083
10 8 0 6.0732 0.0439
10 8 1 2.1176 -0.0085
10 8 2 -2.7681 0.0014
10 8 3 -4.4408 0.0167
10 8 4 -1.2623 0.0049
10 8 5 2.4455 0.0005
10 8 6 0.4778 0.0122
10 8 7 -5.3063 0.0129
10 8 8 -6.8310 0.0002
10 8 9 -2.9656 -0.0058
10 8 10 -0.4125 0.0007
10 8 11 -1.2252 0.0092
10 8 12 -1.3694 0.0109
10 8 13 -0.6704 0.0076
10 8 14 -2.3332 0.0091
10 8 15 -4.8176 0.0162
10 8 16 -4.3050 0.0148
10 8 17 -1.8573 -0.0007
10 8 18 -0.7120 -0.0137
10 8 19 -0.7349 -0.0106
10 9 0 3.0501 0.0816
10 9 1 -1.9275 0.0212
10 9 2 -4.8857 -0.0000
10 9 3 -4.9117 0.0065
10 9 4 -1.3221 -0.0059
10 9 5 3.6796 -0.0193
10 9 6 3.6603 -0.0059
10 9 7 -2.1287 0.0092
10 9 8 -5.6518 0.0014
10 9 9 -3.3699 -0.0065
10 9 10 -1.0314 0.0063
10 9 11 -1.3428 0.0186
10 9 12 -0.6769 0.0100
10 9 13 0.7821 -0.0034
10 9 14 -0.4408 0.0007
10 9 15 -2.1768 0.0151
10 9 16 -0.3888 0.0170
10 9 17 2.4598 0.0008
10 9 18 2.1832 -0.0139
10 10 1 -4.9880 0.0237
10 10 2 -5.2677 -0.0057
10 10 3 -4.3357 0.0010
10 10 4 -1.3311 -0.0034
10 10 5 4.5288 -0.0214
10 10 6 6.6126 -0.0159
10 10 7 1.1633 0.0014
10 10 8 -4.0524 -0.0028
10 10 9 -3.1628 -0.0118
10 10 10 -1.2734 -0.0003
10 10 11 -1.9781 0.0113
10 10 12 -1.5887 0.0030
10 10 13 0.0952 -0.0065
10 10 14 -0.5758 -0.0041
10 10 15 -1.2561 -0.0011
10 10 16 2.0376 -0.0039
10 11 6 7.2534 -0.0082
10 11 7 2.3815 0.0097
10 11 8 -2.6456 0.0064
10 11 9 -1.4131 -0.0083
10 11 10 0.4346 -0.0098
10 11 11 -1.3634 -0.0072
10 11 12 -2.4600 -0.0057
11 -10 0 -2.0214 0.1124
11 -10 1 -5.0857 0.0475
11 -10 2 -4.1188 -0.0305
11 -9 0 -5.8638 0.0903
11 -9 1 -10.5164 0.0763
11 -9 2 -8.9738 0.0008
11 -9 3 -5.9278 -0.0330
11 -9 4 -4.9578 -0.0107
11 -9 5 -3.5092 0.0071
11 -9 6 -0.8916 0.0056
11 -8 0 -5.3097 0.0203
11 -8 1 -7.7187 0.0578
11 -8 2 -5.5762 0.0130
11 -8 3 -5.3090 -0.0360
11 -8 4 -8.2597 -0.0228
11 -8 5 -8.0264 0.0051
11 -8 6 -2.9876 0.0053
11 -8 7 0.9070 0.0031
11 -8 8 0.8180 0.0077
11 -8 9 -0.5481 0.0013
11 -7 0 -4.6967 -0.0585
11 -7 1 -1.6493 0.0173
11 -7 2 2.7575 0.0178
11 -7 3 0.8633 -0.0285
11 -7 4 -6.3608 -0.0235
11 -7 5 -9.2165 0.0078
11 -7 6 -4.2203 0.0015
11 -7 7 1.6715 -0.0118
11 -7 8 3.0030 0.0016
11 -7 9 1.5198 0.0073
11 -7 10 0.6031 -0.0078
11 -7 11 1.6771 -0.0125
11 -6 0 -5.7906 -0.1124
11 -6 1 -0.1291 -0.0247
11 -6 2 5.6589 0.0186
11 -6 3 4.6138 -0.0096
11 -6 4 -2.2792 -0.0103
11 -6 5 -6.0585 0.0197
11 -6 6 -2.5251 0.0092
11 -6 7 2.5554 -0.0174
11 -6 8 3.4029 -0.0045
11 -6 9 1.4253 0.0133
11 -6 10 1.3150 -0.0011
11 -6 11 5.0227 -0.0134
11 -6 12 8.8358 -0.0035
11 -6 13 6.4814 0.0021
11 -5 0 -5.1333 -0.1159
11 -5 1 -2.2891 -0.0562
11 -5 2 1.5249 0.0067
11 -5 3 2.4473 0.0045
11 -5 4 -0.4087 0.0024
11 -5 5 -2.1592 0.0256
11 -5 6 0.6444 0.0163
11 -5 7 4.1566 -0.0144
11 -5 8 3.3388 -0.0050
11 -5 9 -0.5215 0.0220
11 -5 10 -1.4701 0.0137
11 -5 11 3.7207 -0.0076
11 -5 12 10.1943 -0.0042
11 -5 13 9.6467 0.0088
11 -5 14 2.7698 0.0100
11 -4 0 -2.1568 -0.0609
11 -4 1 -3.1888 -0.0601
11 -4 2 -1.8810 -0.0088
11 -4 3 0.4658 0.0124
11 -4 4 0.3905 0.0114
11 -4 5 -0.6549 0.0207
11 -4 6 1.1893 0.0130
11 -4 7 4.3537 -0.0141
11 -4 8 3.8660 -0.0117
11 -4 9 -0.5816 0.0167
11 -4 10 -3.3072 0.0194
11 -4 11 0.2827 -0.0031
11 -4 12 6.4008 -0.0093
11 -4 13 6.6165 0.0052
11 -4 14 1.1213 0.0151
11 -4 15 0.0248 0.0107
11 -4 16 6.7436 0.0010
11 -3 0 -0.3322 0.0213
11 -3 1 -2.5072 -0.0346
11 -3 2 -0.9127 -0.0150
11 -3 3 2.8755 0.0189
11 -3 4 2.8678 0.0196
11 -3 5 -0.3982 0.0124
11 -3 6 -0.8766 0.0070
11 -3 7 2.1176 -0.0082
11 -3 8 3.3331 -0.0142
11 -3 9 0.4653 0.0021
11 -3 10 -2.4241 0.0106
11 -3 11 -0.6199 -0.0040
11 -3 12 3.7579 -0.0134
11 -3 13 3.3736 -0.0006
11 -3 14 -2.4957 0.0115
11 -3 15 -4.7186 0.0045
11 -3 16 1.3250 -0.0068
11 -3 17 7.9058 -0.0046
11 -2 0 -0.1130 0.0867
11 -2 1 -1.9238 0.0036
11 -2 2 0.5877 -0.0136
11 -2 3 4.9257 0.0171
11 -2 4 4.3908 0.0180
11 -2 5 0.0777 -0.0029
11 -2 6 -1.0994 -0.0048
11 -2 7 1.4818 0.0009
11 -2 8 2.3827 -0.0031
11 -2 9 -0.4332 -0.0022
11 -2 10 -3.2464 0.0038
11 -2 11 -1.8229 -0.0025
11 -2 12 2.7795 -0.0116
11 -2 13 4.1419 -0.0034
11 -2 14 -0.5500 0.0083
11 -2 15 -4.8375 0.0019
11 -2 16 -2.7809 -0.0085
11 -2 17 1.7259 -0.0033
11 -1 0 0.8454 0.1116
11 -1 1 -0.8058 0.0375
11 -1 2 0.0955 -0.0084
11 -1 3 2.3428 0.0063
11 -1 4 1.5383 0.0072
11 -1 5 -0.3068 -0.0213
11 -1 6 1.7570 -0.0250
11 -1 7 5.2325 -0.0020
11 -1 8 4.1948 0.0059
11 -1 9 -1.0593 -0.0001
11 -1 10 -5.4927 0.0022
11 -1 11 -5.3070 0.0042
11 -1 12 -0.6177 -0.0029
11 -1 13 3.7490 -0.0043
11 -1 14 3.0356 0.0009
11 -1 15 -0.4109 -0.0014
11 -1 16 -1.0639 -0.0046
11 -1 17 0.7110 0.0029
11 -1 18 1.1065 0.0063
11 0 0 2.1561 0.0879
11 0 1 0.6092 0.0510
11 0 2 -1.0144 -0.0031
11 0 3 -1.4438 -0.0056
11 0 4 -2.3273 0.0001
11 0 5 -1.3678 -0.0237
11 0 6 4.0075 -0.0329
11 0 7 8.6966 -0.0074
11 0 8 6.9559 0.0078
11 0 9 1.2830 -0.0028
11 0 10 -3.1262 -0.0063
11 0 11 -4.5286 0.0044
11 0 12 -2.6851 0.0073
11 0 13 0.8558 0.0000
11 0 14 2.1922 -0.0062
11 0 15 0.6717 -0.0103
11 0 16 -0.0434 -0.0097
11 0 17 1.1844 -0.0017
11 0 18 2.0129 0.0030
11 0 19 1.6935 -0.0010
11 1 0 2.3166 0.0229
11 1 1 0.2862 0.0348
11 1 2 -2.0691 -0.0018
11 1 3 -2.2771 -0.0151
11 1 4 -2.2050 -0.0040
11 1 5 -0.9309 -0.0111
11 1 6 3.4115 -0.0198
11 1 7 6.5899 -0.0016
11 1 8 4.9508 0.0130
11 1 9 2.4523 -0.0031
11 1 10 2.5233 -0.0181
11 1 11 2.7528 -0.0062
11 1 12 1.8922 0.0092
11 1 13 1.5634 0.0059
11 1 14 1.0559 -0.0055
11 1 15 -0.7410 -0.0113
11 1 16 -1.7633 -0.0117
11 1 17 -0.7310 -0.0095
11 1 18 0.6846 -0.0060
11 1 19 1.5043 -0.0002
11 2 0 2.0230 -0.0517
11 2 1 -1.3079 0.0021
11 2 2 -3.0552 0.0009
11 2 3 -1.1974 -0.0168
11 2 4 0.2462 -0.0084
11 2 5 0.3668 0.0015
11 2 6 1.4506 -0.0022
11 2 7 1.5089 0.0033
11 2 8 -0.9265 0.0128
11 2 9 -1.0284 -0.0004
11 2 10 3.4578 -0.0203
11 2 11 7.1657 -0.0145
11 2 12 6.7461 0.0037
11 2 13 4.8798 0.0046
11 2 14 3.1870 -0.0046
11 2 15 0.9674 -0.0043
11 2 16 -0.7489 0.0007
11 2 17 -0.9352 -0.0007
11 2 18 -0.6856 -0.0041
11 2 19 -0.4446 -0.0010
11 3 0 1.0397 -0.0959
11 3 1 -2.2368 -0.0249
11 3 2 -2.9672 0.0084
11 3 3 -0.5770 -0.0078
11 3 4 0.4798 -0.0074
11 3 5 -0.3523 0.0150
11 3 6 -0.2437 0.0165
11 3 7 -0.7164 0.0018
11 3 8 -3.4470 -0.0020
11 3 9 -4.0829 -0.0045
11 3 10 -0.0226 -0.0142
11 3 11 3.9668 -0.0124
11 3 12 4.3186 0.0004
11 3 13 3.4148 0.0013
11 3 14 3.1803 -0.0053
11 3 15 2.8077 0.0005
11 3 16 2.3633 0.0122
11 3 17 2.1206 0.0128
11 3 18 1.0762 0.0058
11 3 19 -0.4112 0.0003
11 4 0 -2.1098 -0.0888
11 4 1 -3.0144 -0.0367
11 4 2 -2.3091 0.0106
11 4 3 -1.1487 -0.0006
11 4 4 -1.8373 -0.0058
11 4 5 -2.7882 0.0264
11 4 6 -1.3461 0.0361
11 4 7 0.1145 0.0050
11 4 8 -1.1320 -0.0141
11 4 9 -2.2019 -0.0068
11 4 10 -0.5354 -0.0036
11 4 11 1.0645 -0.0061
11 4 12 0.4140 -0.0005
11 4 13 -0.5449 0.0040
11 4 14 -0.4214 0.0028
11 4 15 0.2387 0.0069
11 4 16 1.5325 0.0133
11 4 17 2.9821 0.0116
11 4 18 2.6489 0.0053
11 4 19 0.6866 -0.0021
11 5 0 -4.7746 -0.0397
11 5 1 -3.6289 -0.0327
11 5 2 -2.5195 0.0050
11 5 3 -2.8986 0.0006
11 5 4 -4.1179 -0.0095
11 5 5 -3.8993 0.0194
11 5 6 -1.6360 0.0342
11 5 7 0.0828 0.0029
11 5 8 -0.0914 -0.0170
11 5 9 0.0759 0.0005
11 5 10 1.6641 0.0109
11 5 11 2.6063 -0.0002
11 5 12 1.9718 -0.0035
11 5 13 0.8383 0.0064
11 5 14 -0.6763 0.0130
11 5 15 -2.3324 0.0126
11 5 16 -2.1903 0.0078
11 5 17 -0.0935 0.0003
11 5 18 1.0411 -0.0038
11 5 19 0.0820 -0.0073
11 6 0 -2.4740 0.0189
11 6 1 -1.4384 -0.0192
11 6 2 -2.3285 0.0002
11 6 3 -4.3563 0.0081
11 6 4 -4.5381 -0.0049
11 6 5 -2.4324 0.0027
11 6 6 -0.8814 0.0085
11 6 7 -1.6822 -0.0147
11 6 8 -2.7146 -0.0245
11 6 9 -1.4798 0.0006
11 6 10 0.8696 0.0158
11 6 11 2.2980 0.0033
11 6 12 3.4036 -0.0036
11 6 13 4.3667 0.0062
11 6 14 2.8486 0.0118
11 6 15 -1.1903 0.0056
11 6 16 -3.6858 -0.0049
11 6 17 -2.6723 -0.0120
11 6 18 -1.0425 -0.0113
11 6 19 -1.0266 -0.0087
11 7 0 2.9360 0.0593
11 7 1 2.7845 -0.0042
11 7 2 -0.7655 -0.0046
11 7 3 -3.9315 0.0159
11 7 4 -2.9544 0.0085
11 7 5 0.2603 -0.0035
11 7 6 0.5572 -0.0090
11 7 7 -2.6710 -0.0219
11 7 8 -4.5929 -0.0266
11 7 9 -2.9685 -0.0105
11 7 10 -1.2743 0.0025
11 7 11 -1.3984 0.0007
11 7 12 -0.3291 0.0020
11 7 13 2.5596 0.0089
11 7 14 2.8204 0.0074
11 7 15 -0.9303 -0.0022
11 7 16 -3.9275 -0.0112
11 7 17 -3.1426 -0.0167
11 7 18 -1.2022 -0.0164
11 8 0 5.5963 0.0779
11 8 1 3.7332 0.0143
11 8 2 -0.9568 -0.0097
11 8 3 -3.5131 0.0085
11 8 4 -1.5410 0.0089
11 8 5 1.9127 -0.0076
11 8 6 1.7252 -0.0105
11 8 7 -2.0674 -0.0051
11 8 8 -3.8905 -0.0064
11 8 9 -1.6988 -0.0099
11 8 10 -0.3295 -0.0077
11 8 11 -2.2419 -0.0003
11 8 12 -3.1098 0.0069
11 8 13 -0.9646 0.0076
11 8 14 -0.3613 0.0041
11 8 15 -3.2446 0.0041
11 8 16 -5.0564 0.0053
11 8 17 -3.1268 -0.0018
11 9 2 -4.4563 -0.0062
11 9 3 -5.3689 -0.0002
11 9 4 -2.6337 0.0033
11 9 5 1.1754 -0.0130
11 9 6 2.0179 -0.0127
11 9 7 -1.2666 0.0080
11 9 8 -3.8719 0.0140
11 9 9 -2.0553 0.0017
11 9 10 0.3725 -0.0002
11 9 11 -0.5396 0.0106
11 9 12 -1.7211 0.0101
11 9 13 -0.4762 -0.0035
11 9 14 -0.2392 -0.0079
11 9 15 -2.7064 0.0043
11 10 7 -0.2694 0.0093
11 10 8 -5.0464 0.0134
11 10 9 -5.4525 0.0003
11 10 10 -2.6660 0.0041
11 10 11 -2.0521 0.0194
12 -8 0 -4.9823 -0.0687
12 -8 1 -10.9793 0.0022
12 -8 2 -9.1207 0.0344
12 -8 3 -3.4491 -0.0016
12 -8 4 -3.2378 -0.0297
12 -8 5 -6.6295 -0.0105
12 -8 6 -5.3339 0.0203
12 -7 0 -6.7846 -0.1075
12 -7 1 -7.7304 -0.0482
12 -7 2 -2.6110 0.0189
12 -7 3 1.6025 0.0033
12 -7 4 -2.9955 -0.0282
12 -7 5 -10.9000 -0.0065
12 -7 6 -10.6113 0.0237
12 -7 7 -2.7701 0.0224
12 -7 8 2.5355 0.0125
12 -7 9 1.6686 0.0031
12 -6 0 -8.7644 -0.0923
12 -6 1 -4.8169 -0.0606
12 -6 2 3.1349 0.0125
12 -6 3 7.1308 0.0131
12 -6 4 0.7729 -0.0158
12 -6 5 -9.6974 0.0038
12 -6 6 -11.8240 0.0266
12 -6 7 -4.5227 0.0062
12 -6 8 2.0108 -0.0109
12 -6 9 2.0756 -0.0009
12 -6 10 -0.1270 0.0026
12 -6 11 1.0893 -0.0029
12 -5 0 -8.6414 -0.0333
12 -5 1 -5.1910 -0.0436
12 -5 2 1.1563 0.0032
12 -5 3 5.8415 0.0142
12 -5 4 3.2607 -0.0036
12 -5 5 -4.3908 0.0115
12 -5 6 -7.4943 0.0259
12 -5 7 -2.9336 -0.0030
12 -5 8 1.8089 -0.0236
12 -5 9 0.9383 -0.0013
12 -5 10 -1.8102 0.0188
12 -5 11 0.5208 0.0134
12 -5 12 7.9476 0.0066
12 -4 0 -5.1845 0.0453
12 -4 1 -5.8095 -0.0105
12 -4 2 -4.1837 -0.0125
12 -4 3 0.7356 0.0002
12 -4 4 3.3014 -0.0022
12 -4 5 0.0060 0.0056
12 -4 6 -3.0376 0.0112
12 -4 7 -0.5600 -0.0130
12 -4 8 2.9201 -0.0302
12 -4 9 1.3644 -0.0056
12 -4 10 -2.8780 0.0242
12 -4 11 -2.2620 0.0233
12 -4 12 5.0882 0.0089
12 -4 13 10.9878 0.0036
12 -4 14 8.0250 0.0086
12 -3 0 -1.3829 0.1013
12 -3 1 -4.8743 0.0257
12 -3 2 -5.9657 -0.0196
12 -3 3 -0.4725 -0.0118
12 -3 4 4.6299 -0.0016
12 -3 5 2.1252 -0.0024
12 -3 6 -2.5158 -0.0045
12 -3 7 -1.2643 -0.0163
12 -3 8 3.1980 -0.0285
12 -3 9 3.5702 -0.0164
12 -3 10 -0.3999 0.0090
12 -3 11 -2.2483 0.0154
12 -3 12 1.6886 0.0024
12 -3 13 6.0044 -0.0045
12 -3 14 3.7104 0.0041
12 -3 15 -1.0763 0.0126
12 -2 0 1.1099 0.1032
12 -2 1 -2.8913 0.0480
12 -2 2 -3.9814 -0.0134
12 -2 3 2.1174 -0.0136
12 -2 4 7.2305 0.0034
12 -2 5 3.3318 -0.0023
12 -2 6 -3.1237 -0.0086
12 -2 7 -2.7889 -0.0045
12 -2 8 1.9725 -0.0072
12 -2 9 3.6663 -0.0122
12 -2 10 1.1100 -0.0046
12 -2 11 -0.9612 0.0016
12 -2 12 1.0401 -0.0072
12 -2 13 4.0259 -0.0134
12 -2 14 1.8231 -0.0027
12 -2 15 -3.7747 0.0055
12 -2 16 -3.8830 -0.0032
12 -1 0 3.2140 0.0607
12 -1 1 0.3485 0.0496
12 -1 2 -1.1364 -0.0027
12 -1 3 3.2142 -0.0118
12 -1 4 6.9326 0.0073
12 -1 5 3.4729 0.0024
12 -1 6 -1.1032 -0.0081
12 -1 7 0.0368 0.0048
12 -1 8 2.8484 0.0162
12 -1 9 1.7213 0.0078
12 -1 10 -1.8266 0.0004
12 -1 11 -3.4991 -0.0002
12 -1 12 -1.1500 -0.0096
12 -1 13 3.1217 -0.0178
12 -1 14 3.6762 -0.0084
12 -1 15 -0.7404 0.0024
12 -1 16 -3.6106 -0.0010
12 0 0 3.6860 0.0017
12 0 1 3.2713 0.0318
12 0 2 0.6597 0.0032
12 0 3 1.7815 -0.0105
12 0 4 3.9865 0.0096
12 0 5 2.7214 0.0115
12 0 6 2.3479 -0.0052
12 0 7 5.6859 0.0011
12 0 8 6.5135 0.0205
12 0 9 1.6358 0.0196
12 0 10 -3.8360 0.0075
12 0 11 -5.8240 0.0020
12 0 12 -4.2789 -0.0048
12 0 13 -0.3204 -0.0130
12 0 14 2.5472 -0.0101
12 0 15 1.3457 -0.0032
12 0 16 -0.8971 -0.0022
12 0 17 -0.3488 0.0026
12 1 0 1.6901 -0.0553
12 1 1 2.6502 -0.0039
12 1 2 -0.3383 -0.0004
12 1 3 0.0866 -0.0094
12 1 4 2.8713 0.0090
12 1 5 3.1631 0.0191
12 1 6 3.9816 0.0018
12 1 7 7.2039 -0.0033
12 1 8 6.9474 0.0143
12 1 9 1.8790 0.0190
12 1 10 -1.6280 0.0037
12 1 11 -1.5954 -0.0055
12 1 12 -1.2655 -0.0032
12 1 13 -1.0347 -0.0014
12 1 14 -0.3504 -0.0022
12 1 15 -0.7683 -0.0047
12 1 16 -1.6104 -0.0075
12 1 17 -0.5667 -0.0029
12 2 0 0.9727 -0.0914
12 2 1 -0.2271 -0.0426
12 2 2 -3.5099 -0.0061
12 2 3 -0.9676 -0.0040
12 2 4 4.3263 0.0026
12 2 5 4.7857 0.0127
12 2 6 2.9535 0.0034
12 2 7 2.9380 -0.0054
12 2 8 1.3618 0.0065
12 2 9 -2.0498 0.0131
12 2 10 -1.3515 -0.0026
12 2 11 3.1999 -0.0145
12 2 12 5.1400 -0.0055
12 2 13 3.2568 0.0069
12 2 14 0.8826 0.0080
12 2 15 -0.9962 0.0026
12 2 16 -2.1614 -0.0015
12 2 17 -1.5108 -0.0011
12 2 18 -0.0001 0.0012
12 3 0 3.0256 -0.0863
12 3 1 -1.2496 -0.0592
12 3 2 -4.9544 -0.0032
12 3 3 -1.0221 0.0081
12 3 4 5.0892 -0.0044
12 3 5 4.5296 -0.0015
12 3 6 0.4107 0.0021
12 3 7 -1.3826 -0.0062
12 3 8 -3.2552 -0.0077
12 3 9 -6.2989 -0.0030
12 3 10 -5.1887 -0.0089
12 3 11 0.5408 -0.0148
12 3 12 4.5149 -0.0047
12 3 13 4.2865 0.0080
12 3 14 2.6938 0.0091
12 3 15 1.3274 0.0071
12 3 16 0.3999 0.0088
12 3 17 0.4725 0.0092
12 3 18 0.7586 0.0058
12 4 0 2.6684 -0.0384
12 4 1 -1.3397 -0.0443
12 4 2 -3.6973 0.0040
12 4 3 -0.2560 0.0160
12 4 4 3.4427 -0.0103
12 4 5 1.2029 -0.0100
12 4 6 -2.4756 0.0107
12 4 7 -2.0357 0.0049
12 4 8 -1.1375 -0.0163
12 4 9 -3.4205 -0.0202
12 4 10 -5.0965 -0.0138
12 4 11 -3.3259 -0.0100
12 4 12 -0.8767 -0.0030
12 4 13 0.1156 0.0042
12 4 14 0.3914 0.0049
12 4 15 0.4997 0.0056
12 4 16 0.8879 0.0083
12 4 17 2.0736 0.0061
12 5 0 -2.0912 0.0284
12 5 1 -3.3923 -0.0105
12 5 2 -3.1263 0.0073
12 5 3 -0.7234 0.0135
12 5 4 0.1974 -0.0153
12 5 5 -2.6539 -0.0154
12 5 6 -4.6938 0.0168
12 5 7 -1.7856 0.0184
12 5 8 2.4776 -0.0093
12 5 9 3.1522 -0.0162
12 5 10 1.1017 -0.0033
12 5 11 -0.4193 0.0001
12 5 12 -0.4048 -0.0037
12 5 13 0.3423 -0.0021
12 5 14 0.3257 0.0022
12 5 15 -1.1252 0.0042
12 5 16 -2.0358 -0.0001
12 5 17 -0.4154 -0.0104
12 6 0 -5.0172 0.0756
12 6 1 -4.6045 0.0189
12 6 2 -3.6772 0.0066
12 6 3 -2.8049 0.0130
12 6 4 -2.6795 -0.0069
12 6 5 -3.9152 -0.0161
12 6 6 -4.8765 0.0041
12 6 7 -3.0578 0.0092
12 6 8 1.0923 -0.0057
12 6 9 4.3220 -0.0014
12 6 10 4.4158 0.0160
12 6 11 2.8055 0.0137
12 6 12 2.9747 -0.0007
12 6 13 5.4714 -0.0041
12 6 14 6.1677 0.0007
12 6 15 2.3275 0.0002
12 6 16 -2.3536 -0.0102
12 7 0 -2.3297 0.0774
12 7 1 -1.6058 0.0252
12 7 2 -2.4806 -0.0020
12 7 3 -3.6240 0.0138
12 7 4 -2.9399 0.0137
12 7 5 -1.6805 -0.0052
12 7 6 -2.2971 -0.0114
12 7 7 -3.5232 -0.0110
12 7 8 -1.9686 -0.0114
12 7 9 1.5978 0.0004
12 7 10 2.4199 0.0150
12 7 11 -0.1808 0.0130
12 7 12 -0.4512 0.0033
12 7 13 4.3814 0.0015
12 7 14 8.3422 0.0019
12 7 15 5.7180 -0.0045
12 8 3 -2.7332 -0.0003
12 8 4 -1.0841 0.0172
12 8 5 1.6695 0.0011
12 8 6 1.0643 -0.0172
12 8 7 -1.8476 -0.0144
12 8 8 -1.6484 -0.0043
12 8 9 2.1031 -0.0006
12 8 10 2.8846 -0.0026
12 8 11 -2.0142 -0.0043
12 8 12 -5.7370 -0.0022
12 8 13 -2.6639 0.0006
13 -6 0 -8.1589 -0.0029
13 -6 1 -6.7198 -0.0503
13 -6 2 -2.4693 -0.0119
13 -6 3 3.3595 0.0282
13 -6 4 3.6418 0.0079
13 -6 5 -5.3051 -0.0126
13 -6 6 -13.9358 -0.0000
13 -6 7 -11.5338 0.0055
13 -5 0 -9.4558 0.0633
13 -5 1 -5.6910 0.0071
13 -5 2 -0.8475 0.0025
13 -5 3 4.1698 0.0171
13 -5 4 5.5128 -0.0008
13 -5 5 -1.1914 -0.0114
13 -5 6 -10.0882 0.0066
13 -5 7 -10.6043 0.0072
13 -5 8 -3.3525 -0.0114
13 -5 9 1.7193 -0.0110
13 -4 0 -6.1612 0.1073
13 -4 1 -4.1224 0.0538
13 -4 2 -3.4024 0.0064
13 -4 3 -0.1822 -0.0041
13 -4 4 5.2458 -0.0114
13 -4 5 4.8477 -0.0126
13 -4 6 -1.9689 0.0034
13 -4 7 -5.5605 0.0074
13 -4 8 -2.3015 -0.0069
13 -4 9 0.7785 -0.0086
13 -4 10 -1.1450 0.0040
13 -4 11 -3.6358 0.0112
13 -3 0 -1.9339 0.1004
13 -3 1 -2.2743 0.0681
13 -3 2 -5.7134 0.0027
13 -3 3 -3.9210 -0.0224
13 -3 4 4.6239 -0.0189
13 -3 5 8.2783 -0.0162
13 -3 6 2.3212 -0.0086
13 -3 7 -3.1820 0.0009
13 -3 8 -1.4691 -0.0024
13 -3 9 1.8193 -0.0104
13 -3 10 0.4288 -0.0067
13 -3 11 -3.3143 0.0062
13 -3 12 -2.9471 0.0124
13 -2 0 1.2989 0.0334
13 -2 1 -0.0882 0.0446
13 -2 2 -4.7538 0.0014
13 -2 3 -3.4149 -0.0231
13 -2 4 5.2557 -0.0148
13 -2 5 8.3263 -0.0113
13 -2 6 0.9747 -0.0114
13 -2 7 -5.3293 0.0016
13 -2 8 -2.9801 0.0072
13 -2 9 2.1587 -0.0102
13 -2 10 3.0238 -0.0226
13 -2 11 0.0372 -0.0092
13 -2 12 -1.9237 0.0055
13 -2 13 -0.1420 -0.0015
13 -1 0 4.7902 -0.0506
13 -1 1 4.4491 0.0038
13 -1 2 -0.0582 0.0035
13 -1 3 -0.6116 -0.0126
13 -1 4 5.0637 -0.0044
13 -1 5 5.9812 0.0030
13 -1 6 -1.3433 -0.0006
13 -1 7 -6.2812 0.0084
13 -1 8 -3.6144 0.0185
13 -1 9 0.4322 0.0026
13 -1 10 1.2234 -0.0176
13 -1 11 -0.0337 -0.0112
13 -1 12 -0.8943 0.0011
13 -1 13 0.3253 -0.0050
13 -1 14 1.9550 -0.0099
13 0 0 5.9703 -0.0958
13 0 1 9.7402 -0.0256
13 0 2 5.9307 0.0055
13 0 3 1.7586 -0.0036
13 0 4 3.2261 0.0042
13 0 5 3.3273 0.0204
13 0 6 -0.9391 0.0146
13 0 7 -2.3828 0.0068
13 0 8 0.0010 0.0130
13 0 9 -0.1219 0.0121
13 0 10 -2.9201 0.0023
13 0 11 -4.1469 0.0022
13 0 12 -3.3179 0.0034
13 0 13 -1.1509 -0.0054
13 0 14 1.6829 -0.0054
13 0 15 2.0860 0.0088
13 1 0 1.5291 -0.0917
13 1 1 9.7396 -0.0389
13 1 2 7.3948 0.0021
13 1 3 1.7536 0.0002
13 1 4 2.0572 0.0086
13 1 5 3.2905 0.0313
13 1 6 1.6245 0.0239
13 1 7 2.0770 -0.0021
13 1 8 3.9135 -0.0042
13 1 9 1.1624 0.0110
13 1 10 -3.6881 0.0154
13 1 11 -4.7155 0.0096
13 1 12 -3.3454 0.0024
13 1 13 -2.5005 -0.0033
13 1 14 -1.2890 0.0009
13 1 15 -0.1855 0.0105
13 2 0 -3.0616 -0.0577
13 2 1 4.4740 -0.0431
13 2 2 2.1552 -0.0046
13 2 3 -1.4837 0.0056
13 2 4 2.2868 0.0099
13 2 5 5.8635 0.0238
13 2 6 3.6025 0.0158
13 2 7 1.7428 -0.0113
13 2 8 2.1117 -0.0131
13 2 9 -0.2278 0.0113
13 2 10 -3.1612 0.0215
13 2 11 -1.5013 0.0091
13 2 12 1.5632 -0.0020
13 2 13 1.1456 -0.0009
13 2 14 -1.0016 0.0062
13 2 15 -2.1849 0.0086
13 3 0 -0.6756 -0.0078
13 3 1 1.4962 -0.0330
13 3 2 -3.3389 -0.0037
13 3 3 -4.9044 0.0183
13 3 4 2.4873 0.0107
13 3 5 7.3542 0.0011
13 3 6 2.9625 -0.0064
13 3 7 -2.0496 -0.0177
13 3 8 -2.7270 -0.0137
13 3 9 -3.8360 0.0092
13 3 10 -5.3312 0.0207
13 3 11 -2.5146 0.0108
13 3 12 2.3918 0.0021
13 3 13 3.8642 0.0037
13 3 14 2.1284 0.0050
13 3 15 0.1557 0.0019
13 4 0 4.1343 0.0418
13 4 1 2.6992 -0.0078
13 4 2 -3.4241 0.0034
13 4 3 -4.4922 0.0266
13 4 4 2.3069 0.0076
13 4 5 5.4677 -0.0207
13 4 6 -0.0288 -0.0204
13 4 7 -4.4954 -0.0108
13 4 8 -2.8834 -0.0090
13 4 9 -1.8944 -0.0038
13 4 10 -4.6087 0.0047
13 4 11 -5.9502 0.0079
13 4 12 -3.6263 0.0088
13 4 13 -0.6183 0.0067
13 4 14 1.0043 -0.0023
13 4 15 1.3345 -0.0089
13 5 1 1.9551 0.0169
13 5 2 -1.5235 0.0040
13 5 3 -1.9571 0.0176
13 5 4 1.6459 -0.0032
13 5 5 1.7561 -0.0329
13 5 6 -3.3325 -0.0201
13 5 7 -4.7585 0.0070
13 5 8 1.1963 0.0047
13 5 9 6.3537 -0.0102
13 5 10 4.0846 -0.0098
13 5 11 -1.9959 -0.0004
13 5 12 -5.2582 0.0041
13 5 13 -4.0287 -0.0010
13 5 14 -1.2768 -0.0115
13 6 3 -1.7160 0.0049
13 6 4 -0.2414 -0.0038
13 6 5 -1.0465 -0.0275
13 6 6 -4.7199 -0.0174
13 6 7 -5.0555 0.0117
13 6 8 2.0001 0.0148
13 6 9 10.6582 0.0015
13 6 10 12.2120 -0.0009
13 6 11 6.2399 0.0018
13 6 12 0.4793 -0.0029
14 -4 2 1.1182 0.0111
14 -4 3 -0.7297 -0.0149
14 -4 4 1.1356 -0.0075
14 -4 5 5.2154 -0.0022
14 -3 0 -1.2289 0.0210
14 -3 1 3.0385 0.0477
14 -3 2 2.1276 0.0124
14 -3 3 -2.2630 -0.0150
14 -3 4 0.8841 -0.0064
14 -3 5 9.1415 0.0006
14 -3 6 9.5335 -0.0042
14 -3 7 1.7777 0.0033
14 -3 8 -3.2364 0.0222
14 -2 0 1.1552 -0.0461
14 -2 1 4.3181 0.0000
14 -2 2 2.1699 0.0074
14 -2 3 -2.7744 -0.0021
14 -2 4 0.6252 0.0033
14 -2 5 8.9021 0.0022
14 -2 6 8.2924 -0.0122
14 -2 7 -0.5366 -0.0051
14 -2 8 -5.4792 0.0228
14 -2 9 -3.4629 0.0226
14 -1 0 3.0672 -0.1051
14 -1 1 5.8146 -0.0518
14 -1 2 4.1290 0.0035
14 -1 3 -1.5303 0.0154
14 -1 4 -0.9313 0.0102
14 -1 5 3.7220 0.0017
14 -1 6 1.1356 -0.0113
14 -1 7 -6.5635 -0.0058
14 -1 8 -8.7129 0.0182
14 -1 9 -4.7514 0.0149
14 -1 10 -0.8167 -0.0206
14 0 0 4.4438 -0.1063
14 0 1 10.1666 -0.0674
14 0 2 10.2478 0.0057
14 0 3 1.8547 0.0221
14 0 4 -3.2951 0.0049
14 0 5 -2.8587 0.0008
14 0 6 -5.0749 0.0010
14 0 7 -8.8383 -0.0015
14 0 8 -7.6980 0.0040
14 0 9 -4.2630 0.0037
14 0 10 -2.9527 -0.0100
14 0 11 -1.8369 -0.0084
14 1 0 -0.2691 -0.0544
14 1 1 11.4496 -0.0440
14 1 2 14.9913 0.0091
14 1 3 4.8106 0.0140
14 1 4 -4.2312 -0.0075
14 1 5 -5.2582 0.0019
14 1 6 -5.3352 0.0163
14 1 7 -5.5972 -0.0001
14 1 8 -2.7161 -0.0190
14 1 9 -0.9353 -0.0132
14 1 10 -3.2358 0.0023
14 1 11 -4.3333 0.0133
14 2 1 5.7021 -0.0139
14 2 2 11.3356 0.0052
14 2 3 2.6612 0.0026
14 2 4 -3.9876 -0.0132
14 2 5 -2.0539 0.0018
14 2 6 -0.6511 0.0191
14 2 7 -1.6346 -0.0036
14 2 8 -0.0197 -0.0311
14 2 9 1.3280 -0.0180
14 2 10 -1.0419 0.0120
14 2 11 -2.3474 0.0193
14 3 3 -3.3732 0.0051
14 3 4 -4.2368 -0.0024
14 3 5 2.3393 -0.0008
14 3 6 3.6955 0.0044
14 3 7 -0.9550 -0.0099
14 3 8 -2.1920 -0.0225
14 3 9 -0.1964 -0.0033
14 3 10 -0.3507 0.0232
14 3 11 -0.6411 0.0210
14 4 6 4.0021 -0.0116
14 4 7 -2.5441 -0.0085
14 4 8 -4.1867 -0.0023
14 4 9 -0.5327 0.0100
0 0 0 0.0 0.0
;
loop_
  _diffrn_refln_index_h
  _diffrn_refln_index_k
  _diffrn_refln_index_l
  _diffrn_refln_intensity_net
  _diffrn_refln_intensity_u
  _diffrn_refln_scale_group_code
 -2 0 0 254.74 51.25 5
 -2 0 0 177.39 9.11 1
 -2 0 0 191.9 7.54 2
 2 0 0 188 9.14 4
 2 0 0 185.54 7.54 2
 2 0 0 213.92 37.95 5
 -3 0 0 1211.18 110.35 5
 -3 0 0 1377.93 63.43 4
 -3 0 0 1270.62 65.12 1
 3 0 0 1275.94 113.09 5
 3 0 0 1361.81 58.05 3
 3 0 0 1429.38 63.53 4
 -4 0 0 187.47 9.64 1
 -4 0 0 200.09 62.19 5
 4 0 0 204.49 8.76 3
 4 0 0 185.85 9.99 4
 4 0 0 171.74 46.49 5
 4 0 0 196.54 8.01 2
 -5 0 0 309.31 15.45 1
 -5 0 0 357.43 76.09 5
 -5 0 0 321.37 15.66 4
 -5 0 0 303.57 12.79 2
 5 0 0 334.27 15.86 4
 5 0 0 315.38 13.94 3
 5 0 0 305.19 12.8 2
 5 0 0 276.33 79.6 5
 -6 0 0 1780.42 87.2 1
 -6 0 0 1745.52 172.99 5
 6 0 0 1879.97 85.43 4
 6 0 0 1733.68 174.71 5
 6 0 0 1782.04 72.08 2
 -7 0 0 2.47 52.3 5
 -7 0 0 15.82 1.27 1
 7 0 0 14.76 1.28 2
 7 0 0 116.56 78.38 5
 7 0 0 12.32 2.27 4
 7 0 0 16.02 1.5 3
 -8 0 0 495.31 118.85 5
 8 0 0 245.38 80.14 5
 8 0 0 427.32 17.29 2
 8 0 0 419.21 21.39 4
 8 0 0 423.11 18.75 3
 -9 0 0 302.13 114.7 5
 9 0 0 309.53 16.05 4
 9 0 0 225.7 98.63 5
 9 0 0 297.05 12.57 2
 -10 0 0 102.48 116.19 5
 10 0 0 170.04 88.67 5
 10 0 0 98.02 6.67 4
 10 0 0 93.45 4.52 2
 -11 0 0 -61.01 91.17 5
 11 0 0 0.29 1.98 4
 -12 0 0 220.47 153.65 5
 12 0 0 184.43 11.12 4
 12 0 0 182.68 8.12 2
 -13 0 0 12.86 161.79 5
 -13 0 0 -49.36 118.71 5
 13 0 0 6.49 2.69 4
 13 0 0 6.04 1.31 2
 -14 0 0 120.33 124.83 5
 -14 0 0 143.74 161.2 5
 -15 0 0 -88.69 181.42 5
 -15 0 0 -180.99 173.79 5
 15 0 0 5.89 2.84 4
 15 0 0 2.41 1.26 2
 -16 0 0 158.77 246.81 5
 -16 0 0 8.33 237.89 5
 17 0 0 19.42 2.07 2
 17 0 0 24.24 4.14 4
 17 -1 0 -1.05 2.15 4
 17 -1 0 -0.09 1.04 2
 -16 1 0 118.54 242.08 5
 -16 1 0 47.18 261.7 5
 -15 1 0 339.59 204.35 5
 -15 1 0 200.06 183.65 5
 14 -1 0 63.81 5.89 4
 14 -1 0 65.22 3.61 2
 -14 1 0 148.56 163.11 5
 -14 1 0 58.86 142.44 5
 13 -1 0 0.26 2.28 4
 13 -1 0 1.84 1.08 2
 -13 1 0 -237.39 143.38 5
 -13 1 0 129.44 143.65 5
 -12 1 0 -213.8 120.25 5
 -12 1 0 -213.59 241.72 5
 11 -1 0 101.63 5 2
 11 -1 0 112.26 7.44 4
 -11 1 0 153.8 101.38 5
 -11 1 0 66.14 109.18 5
 -10 1 0 34.91 84.39 5
 -10 1 0 -51.8 82.01 5
 -9 1 0 65.13 91.27 5
 -8 1 0 -26.45 65.61 5
 7 -1 0 147.43 6.29 2
 7 -1 0 37.12 61.08 5
 7 -1 0 137.38 6.88 3
 7 -1 0 144.5 8.35 4
 -7 1 0 230.59 77.98 5
 -7 1 0 150.5 7.41 1
 6 -1 0 54.73 49.12 5
 6 -1 0 140.87 6.41 3
 6 -1 0 138.54 5.79 2
 6 -1 0 125.42 7.58 4
 -6 1 0 132.14 6.82 1
 -6 1 0 99.67 57.48 5
 5 -1 0 226.46 70.48 5
 5 -1 0 143.97 6.77 3
 5 -1 0 145.06 7.98 4
 -5 1 0 141.56 7.29 1
 -5 1 0 120.9 41.36 5
 -5 1 0 150.95 6.15 2
 4 -1 0 1123.89 45.25 2
 4 -1 0 1157.56 48.9 3
 4 -1 0 1117.58 53.58 4
 4 -1 0 1033.78 109.17 5
 -4 1 0 1161.86 48.92 3
 -4 1 0 1128.59 45.25 2
 -4 1 0 1064.2 111.63 5
 3 -1 0 9.6 0.92 3
 3 -1 0 9.93 0.68 2
 3 -1 0 7.99 1.56 4
 -3 1 0 -9.86 23.88 5
 -3 1 0 6.88 0.6 2
 -3 1 0 6 0.79 3
 -2 1 0 1574.86 116.17 5
 -2 1 0 1654.66 116.47 5
 1 -1 0 540.52 22.46 3
 1 -1 0 513.5 44.71 5
 1 -1 0 498.29 25.09 1
 -1 1 0 501.43 25.08 1
 -1 1 0 542.43 22.45 3
 -1 -1 0 888.22 65.64 5
 -1 -1 0 883.38 42.67 4
 1 1 0 928.59 42.68 4
 -2 -1 0 142.39 5.81 2
 -2 -1 0 140.82 7.11 1
 -2 -1 0 132.18 30.64 5
 2 1 0 136.79 7.13 1
 2 1 0 153.6 7.2 4
 2 1 0 147.06 5.82 2
 2 1 0 88.17 26.52 5
 -3 -1 0 3.18 0.41 2
 -3 -1 0 1.91 0.75 4
 -3 -1 0 1.17 0.44 1
 -3 -1 0 6.61 16.6 5
 3 1 0 1.1 0.35 2
 3 1 0 3.7 28.86 5
 3 1 0 1.97 0.79 4
 -4 -1 0 265.51 11.11 2
 -4 -1 0 267.92 13.61 4
 -4 -1 0 280.36 13.52 1
 -4 -1 0 223.56 63.3 5
 4 1 0 264.69 13.64 4
 4 1 0 287.64 11.14 2
 4 1 0 327.25 74.69 5
 -5 -1 0 88.31 39.34 5
 -5 -1 0 154.81 6.36 2
 -5 -1 0 145.6 7.69 1
 -5 -1 0 144.75 8.09 4
 5 1 0 164.18 8.34 4
 5 1 0 141.69 53.27 5
 5 1 0 152.38 6.37 2
 -6 -1 0 114.09 5.87 1
 -6 -1 0 84.84 58.23 5
 6 1 0 72.41 48.74 5
 6 1 0 109.35 4.86 2
 6 1 0 112.73 6.65 4
 -7 -1 0 -0.24 57.93 5
 7 1 0 -15.49 53.47 5
 -8 -1 0 281.05 101.3 5
 8 1 0 270.46 14.53 4
 8 1 0 276.54 11.43 2
 8 1 0 274.76 12.46 3
 8 1 0 349.7 103.28 5
 -9 -1 0 109.11 96.07 5
 9 1 0 43.51 75.54 5
 -10 -1 0 33.3 109.11 5
 10 1 0 154.47 107.4 5
 10 1 0 73.88 5.56 4
 10 1 0 64.66 3.42 2
 -11 -1 0 -16.58 106.19 5
 11 1 0 3.34 1.12 2
 11 1 0 -77.31 93.38 5
 11 1 0 6.25 2.45 4
 -12 -1 0 72.73 124.33 5
 12 1 0 40.34 2.6 2
 12 1 0 20.47 87.18 5
 12 1 0 41.89 4.78 4
 -13 -1 0 63.03 168.03 5
 -14 -1 0 243.93 182.73 5
 -14 -1 0 -390.9 183.88 5
 -15 -1 0 39.42 187.08 5
 -15 -1 0 182.04 212.92 5
 -16 -1 0 -54.78 210.38 5
 17 1 0 -0.81 2.45 4
 17 -2 0 26.78 4.43 4
 17 -2 0 22.46 2.23 2
 16 -2 0 -0.4 1 2
 -16 2 0 322.33 213.44 5
 -16 2 0 -0.73 250.91 5
 15 -2 0 -0.95 0.99 2
 15 -2 0 1.78 2.42 4
 -15 2 0 117.43 224.67 5
 -15 2 0 -206.78 140.56 5
 -14 2 0 36.05 160.92 5
 -14 2 0 151.19 121.82 5
 13 -2 0 67.4 5.99 4
 13 -2 0 68.16 3.73 2
 -13 2 0 313.37 193.08 5
 -13 2 0 -35.35 138.94 5
 12 -2 0 12.87 2.87 4
 -12 2 0 -32.34 115.86 5
 -12 2 0 -40.16 119.31 5
 11 -2 0 14.74 3.33 4
 11 -2 0 26.65 2.12 2
 -11 2 0 103.99 112.63 5
 -11 2 0 40.92 94.22 5
 10 -2 0 13.57 2.8 4
 10 -2 0 8.56 1.31 2
 -10 2 0 115.05 97.89 5
 -10 2 0 -46.46 102.63 5
 9 -2 0 0.36 0.69 2
 9 -2 0 0.4 1.66 4
 -9 2 0 -119.08 67.21 5
 -9 2 0 0.91 0.47 1
 -9 2 0 102.03 108.28 5
 8 -2 0 14.35 2.61 4
 8 -2 0 12.45 1.31 2
 -8 2 0 64.91 65.71 5
 -8 2 0 28.79 66.06 5
 -8 2 0 11.27 1.31 1
 7 -2 0 408.7 18.52 3
 7 -2 0 416.95 17.03 2
 7 -2 0 433.25 21.03 4
 -7 2 0 456.75 110.26 5
 -7 2 0 406.39 20.33 1
 -7 2 0 790.58 148.5 5
 6 -2 0 102.09 4.97 3
 6 -2 0 100.15 6.17 4
 6 -2 0 105.02 4.47 2
 -6 2 0 87.29 46.8 5
 -6 2 0 135.91 59.93 5
 -6 2 0 92.64 5.1 1
 -6 2 0 101.92 5.05 3
 5 -2 0 279.09 11.2 2
 5 -2 0 267.36 12.25 3
 -5 2 0 273.54 12.3 3
 -5 2 0 177.49 57.16 5
 -5 2 0 260.06 73.44 5
 -4 2 0 -7.29 28.21 5
 -4 2 0 -6.44 27.12 5
 3 -2 0 8 0.97 3
 3 -2 0 8.44 0.67 2
 -3 2 0 7.07 0.93 3
 -3 2 0 15.48 29.07 5
 -3 2 0 5.06 0.73 1
 -3 2 0 7.15 0.62 2
 2 -2 0 316.74 15.98 1
 2 -2 0 381.33 61.4 5
 2 -2 0 329.71 14.44 3
 2 -2 0 333.68 13.23 2
 -2 2 0 327.3 15.94 1
 -2 2 0 336.7 14.46 3
 -2 2 0 362.18 56.98 5
 -2 2 0 326.97 13.23 2
 1 -2 0 254.25 38.1 5
 1 -2 0 318.73 13.08 2
 1 -2 0 326.41 15.86 1
 -1 2 0 341.24 15.84 1
 -1 2 0 318.77 13.08 2
 -1 2 0 331.13 14.31 3
 0 -2 0 3161.31 187.33 5
 -1 -2 0 272.92 10.93 2
 -1 -2 0 266.69 13.15 4
 -1 -2 0 271.24 11.99 3
 -1 -2 0 358.86 48.06 5
 1 2 0 283.96 13.44 1
 1 2 0 259.97 13.11 4
 1 2 0 267.41 10.93 2
 1 2 0 280.05 12.01 3
 -2 -2 0 5865.68 339.85 5
 2 2 0 5616.44 337.8 5
 -3 -2 0 24.88 1.64 1
 -3 -2 0 24.36 1.22 2
 -3 -2 0 54.92 27.92 5
 -3 -2 0 26.61 2.1 4
 3 2 0 28.65 1.54 3
 3 2 0 23.32 1.71 1
 3 2 0 24.75 1.25 2
 3 2 0 34.76 26.02 5
 3 2 0 30.31 2.15 4
 -4 -2 0 17.09 1.86 4
 -4 -2 0 16.47 36.72 5
 -4 -2 0 10.03 0.8 2
 -4 -2 0 13.08 1.11 1
 4 2 0 -8.59 35.72 5
 4 2 0 11.14 1.26 1
 4 2 0 14.96 1.9 4
 4 2 0 13.67 0.87 2
 -5 -2 0 538.22 26.05 1
 -5 -2 0 525.5 21.42 2
 -5 -2 0 400.49 85.39 5
 5 2 0 479.1 94.3 5
 5 2 0 536.68 21.44 2
 5 2 0 537.15 25.92 4
 -6 -2 0 -26.9 57.73 5
 6 2 0 3.54 1.38 4
 6 2 0 -11.44 32.55 5
 6 2 0 2.23 0.59 2
 7 2 0 -7.56 40.33 5
 7 2 0 0.56 0.6 2
 7 2 0 2.06 1.38 4
 -8 -2 0 -61.54 83.07 5
 8 2 0 29.05 1.81 2
 8 2 0 55.26 62.04 5
 8 2 0 33.5 3.58 4
 -9 -2 0 -29.83 77.33 5
 9 2 0 0.03 0.72 2
 9 2 0 1.71 1.68 4
 9 2 0 -4.63 63.63 5
 -10 -2 0 132.81 119.91 5
 10 2 0 91.24 4.29 2
 10 2 0 38.4 83.46 5
 10 2 0 86.67 6.33 4
 -11 -2 0 147.13 130.68 5
 11 2 0 -154.74 84.42 5
 -12 -2 0 101.7 123.57 5
 12 2 0 -9.73 93.22 5
 12 2 0 6.7 2.62 4
 -13 -2 0 2.25 180.73 5
 13 2 0 48.69 126.87 5
 13 2 0 19.79 1.88 2
 13 2 0 17.41 3.59 4
 -14 -2 0 -12.5 195.7 5
 14 2 0 45.91 5.21 4
 14 2 0 46.48 2.94 2
 14 2 0 47.39 3 3
 -15 -2 0 234.41 228.21 5
 -15 -2 0 65.44 158.19 5
 16 2 0 8.92 1.34 3
 16 2 0 9.33 3.26 4
 17 -3 0 12.62 3.38 4
 -16 3 0 145.64 304.32 5
 -16 3 0 389.97 239.87 5
 -15 3 0 -295.16 244.57 5
 -15 3 0 471.54 173.3 5
 14 -3 0 4.3 2.53 4
 14 -3 0 -0.01 1.1 2
 -14 3 0 -48.54 183.66 5
 -14 3 0 -380.99 183.41 5
 -14 3 0 0.43 1.17 1
 13 -3 0 107.66 7.59 4
 13 -3 0 98.02 4.97 2
 -13 3 0 92.37 144.62 5
 -13 3 0 -131.78 154.89 5
 12 -3 0 115.12 7.84 4
 12 -3 0 109.08 5.31 2
 -12 3 0 136.35 149.25 5
 -12 3 0 166.73 132.16 5
 11 -3 0 0.3 0.93 2
 11 -3 0 0.49 2.09 4
 -11 3 0 -110.12 93.28 5
 -11 3 0 1.55 0.6 1
 -11 3 0 64.69 93.79 5
 -10 3 0 -91.18 99.53 5
 -10 3 0 -20.39 92.91 5
 9 -3 0 97.99 6.44 4
 9 -3 0 87.82 4.25 2
 -9 3 0 120.91 73.11 5
 -9 3 0 89.38 5.12 1
 -9 3 0 159.95 96.83 5
 8 -3 0 49.38 2.72 2
 8 -3 0 57.32 4.51 4
 -8 3 0 20.88 52.17 5
 -8 3 0 141.35 88.84 5
 -8 3 0 48.1 3.17 3
 -8 3 0 51.72 2.78 1
 7 -3 0 10.95 2.28 4
 -7 3 0 -22.63 44.98 5
 -7 3 0 -40.75 54.45 5
 6 -3 0 83.77 3.72 2
 6 -3 0 82.81 4.19 3
 -6 3 0 86.22 4.34 3
 -6 3 0 72.48 4.31 1
 -6 3 0 67.59 67.81 5
 -6 3 0 120.22 61.64 5
 5 -3 0 547.07 21.49 2
 5 -3 0 549.9 23.42 3
 -5 3 0 476.37 82.3 5
 -5 3 0 570.31 106.04 5
 -5 3 0 534.15 23.45 3
 -5 3 0 497.1 25.86 1
 4 -3 0 246.69 10.79 3
 4 -3 0 244.18 9.75 2
 -4 3 0 210.86 11.62 1
 -4 3 0 239.66 59.11 5
 -4 3 0 245.97 10.82 3
 -4 3 0 242.88 9.76 2
 3 -3 0 190.66 8.8 3
 3 -3 0 192.2 7.92 2
 3 -3 0 177.72 9.54 1
 3 -3 0 234.27 55.32 5
 -3 3 0 197.01 9.46 1
 -3 3 0 202.95 7.94 2
 -3 3 0 194.78 48.17 5
 -3 3 0 197.59 8.86 3
 2 -3 0 3.36 0.71 3
 2 -3 0 5.16 0.5 2
 2 -3 0 5.29 20.94 5
 2 -3 0 3.96 0.6 1
 -2 3 0 4.21 0.84 3
 -2 3 0 4.21 0.46 2
 -2 3 0 4.8 0.55 1
 1 -3 0 841.47 73.27 5
 1 -3 0 758.94 32.71 3
 1 -3 0 738.17 30.06 2
 1 -3 0 744.42 35.45 4
 1 -3 0 752.42 36.49 1
 -1 3 0 765.03 32.73 3
 -1 3 0 760.86 36.45 1
 -1 3 0 744.28 30.07 2
 0 -3 0 108.71 5.28 4
 0 -3 0 138.59 33.83 5
 0 -3 0 103.35 4.86 3
 0 -3 0 106.36 5.24 1
 0 -3 0 101.79 4.15 2
 0 3 0 98.59 4.86 3
 0 3 0 101.1 4.17 2
 0 3 0 105.42 5.24 1
 0 3 0 101.97 5.22 4
 -1 -3 0 1093.02 48.55 3
 -1 -3 0 1094.23 88.5 5
 -1 -3 0 1148.62 52.9 4
 -1 -3 0 1151.04 54.44 1
 1 3 0 1145.16 52.83 4
 1 3 0 1118.25 54.47 1
 1 3 0 1114.48 48.59 3
 -2 -3 0 2790.09 124.97 4
 -2 -3 0 2622.56 180.61 5
 2 3 0 2577.37 124.84 4
 -3 -3 0 188.95 7.8 2
 -3 -3 0 221.24 52.6 5
 -3 -3 0 193.58 9.84 4
 3 3 0 72.62 27.24 5
 3 3 0 221.27 9.89 4
 3 3 0 189.34 9.76 1
 3 3 0 181.99 7.81 2
 3 3 0 196.6 8.68 3
 -4 -3 0 1213.02 57.74 1
 -4 -3 0 1259.95 125.66 5
 -4 -3 0 1164.46 56.41 4
 -4 -3 0 1175.49 47.51 2
 4 3 0 1254.87 56.43 4
 4 3 0 1268.9 158.67 5
 4 3 0 1074.14 57.81 1
 4 3 0 1215.53 47.53 2
 4 3 0 1234.22 51.42 3
 -5 -3 0 -26.99 42.9 5
 5 3 0 7.44 1.9 4
 5 3 0 -11.82 32.23 5
 -6 -3 0 29.8 54.31 5
 6 3 0 62.09 2.93 2
 6 3 0 40.07 47.88 5
 6 3 0 56.21 3.12 3
 6 3 0 59.09 4.17 4
 -7 -3 0 91.79 74.54 5
 7 3 0 -1.49 39.7 5
 7 3 0 70.96 5.23 4
 7 3 0 80.47 3.65 2
 7 3 0 82.15 4.06 3
 -8 -3 0 229.7 84.85 5
 8 3 0 386.4 20.27 4
 8 3 0 235.53 87.81 5
 8 3 0 403.03 17.71 3
 8 3 0 413.32 16.34 2
 -9 -3 0 166.29 88.54 5
 9 3 0 79.18 3.96 3
 9 3 0 68.72 3.51 2
 9 3 0 72.23 5.46 4
 9 3 0 32.11 80.58 5
 -10 -3 0 214.93 95.77 5
 10 3 0 136.59 8.25 4
 10 3 0 123.43 5.74 2
 10 3 0 128.32 6.26 3
 10 3 0 -3.87 99.34 5
 -11 -3 0 5.69 122.35 5
 11 3 0 56.11 3.02 2
 11 3 0 52.18 3.23 3
 11 3 0 81.07 99.64 5
 -12 -3 0 -32.54 119.87 5
 12 3 0 136.37 144.76 5
 12 3 0 96.04 4.71 2
 12 3 0 97.33 5.03 3
 12 3 0 99.87 7.17 4
 -13 -3 0 116.15 139.54 5
 13 3 0 12.16 133.05 5
 -14 -3 0 -56.65 226.64 5
 14 3 0 3.26 1.08 3
 14 3 0 3.39 1.12 2
 14 3 0 1.53 2.42 4
 14 3 0 45 147.19 5
 -15 -3 0 148.08 202.03 5
 16 3 0 4.7 2.86 4
 16 3 0 6.78 1.59 2
 16 3 0 2.87 1.14 3
 16 -4 0 -1.21 1.06 2
 16 -4 0 0.03 2.33 4
 -15 4 0 -213.84 212.61 5
 -15 4 0 21.03 225.83 5
 14 -4 0 4.03 2.5 4
 14 -4 0 -0.3 1.11 2
 -14 4 0 203.31 195.49 5
 -14 4 0 1.56 0.9 1
 -14 4 0 -128.67 169.6 5
 -13 4 0 7.04 147.16 5
 -13 4 0 94.91 149.29 5
 12 -4 0 117.98 8.22 4
 12 -4 0 125.88 5.68 2
 -12 4 0 123.28 6.1 1
 -12 4 0 110.13 118.5 5
 -12 4 0 357.92 160.81 5
 -12 4 0 110 6.34 1
 -11 4 0 20.03 103.37 5
 -11 4 0 -61.2 110.06 5
 10 -4 0 29.47 1.95 2
 10 -4 0 33.08 4.29 4
 -10 4 0 28.01 1.65 1
 -10 4 0 -43.78 82.78 5
 -10 4 0 180.52 120.6 5
 -10 4 0 24.73 1.99 1
 9 -4 0 21.9 3.26 4
 9 -4 0 19.96 1.7 2
 -9 4 0 16.96 1.58 1
 -9 4 0 -67.03 80.79 5
 -9 4 0 24.45 2.32 3
 -9 4 0 19.23 1.23 1
 -9 4 0 23.62 74.74 5
 8 -4 0 69.57 5.3 4
 8 -4 0 70.91 3.41 2
 -8 4 0 66.33 3.48 1
 -8 4 0 107.34 87.25 5
 -8 4 0 49.9 75.79 5
 -8 4 0 66.21 3.98 3
 -8 4 0 65.7 3.73 1
 7 -4 0 348.78 13.88 2
 -7 4 0 312.07 16.49 1
 -7 4 0 411.9 84.98 5
 -7 4 0 343.84 15.34 3
 6 -4 0 589.92 23.22 2
 -6 4 0 533.92 27.81 1
 -6 4 0 595.6 25.47 3
 -6 4 0 562.18 91.64 5
 -6 4 0 700.45 116.09 5
 5 -4 0 473.28 18.86 2
 -5 4 0 473.26 20.71 3
 -5 4 0 451.6 22.56 1
 -5 4 0 417.73 86.21 5
 4 -4 0 33.36 2.22 3
 4 -4 0 38.22 2.14 1
 4 -4 0 37.35 1.84 2
 4 -4 0 52.76 42.8 5
 -4 4 0 28.63 36.83 5
 -4 4 0 35.96 2.35 3
 -4 4 0 35.79 1.99 1
 -4 4 0 36.11 1.81 2
 3 -4 0 2450.83 103.06 3
 3 -4 0 2192.95 115.37 1
 3 -4 0 2691.16 187.86 5
 -3 4 0 2391.64 95.41 2
 -3 4 0 2461.1 181.85 5
 -3 4 0 2486.95 115.26 1
 -3 4 0 2364.8 103.05 3
 2 -4 0 652.66 84.92 5
 2 -4 0 729.53 35.87 1
 2 -4 0 729.49 32.24 3
 2 -4 0 741.75 29.56 2
 -2 4 0 737.52 32.28 3
 -2 4 0 741.54 29.58 2
 -2 4 0 767 35.78 1
 1 -4 0 236.35 43.06 5
 1 -4 0 250.67 10.22 2
 1 -4 0 249.05 12.52 1
 1 -4 0 241.77 12.37 4
 1 -4 0 269.84 11.48 3
 -1 4 0 259.83 12.49 1
 -1 4 0 253.52 10.23 2
 0 -4 0 969.64 88.54 5
 0 -4 0 1029.8 48.21 1
 0 -4 0 985.45 39.6 2
 0 4 0 975.66 46.8 4
 0 4 0 969.66 43.16 3
 0 4 0 990.66 39.62 2
 0 4 0 1022.42 48.23 1
 0 4 0 1064.4 96.47 5
 -1 -4 0 68.91 32.46 5
 -1 -4 0 93.12 5.13 4
 1 4 0 95.83 4.68 3
 1 4 0 98.93 5.06 4
 1 4 0 95.47 5.03 1
 -2 -4 0 1386.42 66.41 4
 -2 -4 0 1401.46 61.03 3
 -2 -4 0 1361.01 116.19 5
 -2 -4 0 1424.23 56.09 2
 -2 -4 0 1472.98 68.27 1
 2 4 0 1426.54 60.89 3
 2 4 0 1416.86 56.11 2
 2 4 0 1363.81 66.27 4
 -3 -4 0 198.96 47.44 5
 -3 -4 0 271.12 10.85 2
 -3 -4 0 265.36 13.5 4
 -3 -4 0 278.19 13.46 1
 -3 -4 0 273.94 12.09 3
 3 4 0 273.1 12.08 3
 3 4 0 264.54 13.38 4
 3 4 0 266.97 10.86 2
 3 4 0 182.62 52.23 5
 -4 -4 0 33.9 1.57 2
 -4 -4 0 15.25 40.36 5
 4 4 0 35.12 2.1 3
 4 4 0 35.18 2.65 4
 4 4 0 30.39 2.33 1
 4 4 0 64.48 50.7 5
 4 4 0 32.47 1.6 2
 -5 -4 0 172.81 54.3 5
 -5 -4 0 212.3 8.83 2
 5 4 0 97.21 40.66 5
 5 4 0 230.34 8.79 2
 5 4 0 195.58 10.96 1
 5 4 0 220.71 9.74 3
 5 4 0 210.73 11.12 4
 -6 -4 0 161.12 7.04 2
 -6 -4 0 247.42 89.64 5
 6 4 0 171.09 7.88 3
 6 4 0 175.68 9.3 4
 6 4 0 107.3 45.38 5
 6 4 0 172.74 7.1 2
 -7 -4 0 5.17 61.36 5
 7 4 0 -21.41 40.64 5
 -8 -4 0 -4.17 79.94 5
 8 4 0 -15.39 53.14 5
 8 4 0 12.07 2.4 4
 -9 -4 0 -8.91 100.3 5
 9 4 0 16.58 2.82 4
 9 4 0 17.19 1.7 3
 9 4 0 16.16 1.42 2
 9 4 0 17.46 81.77 5
 -10 -4 0 61.28 116.37 5
 10 4 0 56.11 82.67 5
 -11 -4 0 -109.8 103.24 5
 11 4 0 0.02 1.95 4
 11 4 0 4.48 1.15 3
 11 4 0 -93.93 72 5
 11 4 0 3.48 1.02 2
 -12 -4 0 262.08 144.85 5
 12 4 0 -29.36 115.32 5
 12 4 0 7.83 1.29 2
 12 4 0 7.79 1.39 3
 12 4 0 5.91 2.43 4
 -13 -4 0 -54.59 173.77 5
 13 4 0 3.97 2.45 4
 13 4 0 0.54 128.94 5
 13 4 0 2.58 1.15 2
 13 4 0 4.04 1.11 3
 -14 -4 0 -68.76 209.47 5
 14 4 0 -30.41 174.46 5
 14 4 0 16.08 3.28 4
 15 4 0 295.73 206.92 5
 16 4 0 3.89 2.48 4
 16 4 0 3 1.16 3
 16 4 0 2.91 1.23 2
 16 -5 0 -0.14 1.18 2
 16 -5 0 3.85 2.37 4
 -15 5 0 132.07 219.43 5
 -14 5 0 191.86 203.86 5
 -14 5 0 278 166.62 5
 -13 5 0 46.33 147.29 5
 -13 5 0 134.37 155.7 5
 -12 5 0 86.14 125.28 5
 -12 5 0 76.37 137.82 5
 11 -5 0 28.75 2.13 2
 11 -5 0 24.71 3.98 4
 -11 5 0 87.26 120.63 5
 -11 5 0 5.75 96.55 5
 10 -5 0 15.47 3.04 4
 -10 5 0 -24.5 91.56 5
 -10 5 0 -115.13 93.99 5
 9 -5 0 332.79 13.67 2
 9 -5 0 321.92 17.24 4
 -9 5 0 95.82 77.86 5
 -9 5 0 226.62 107.63 5
 -9 5 0 334.48 15.19 3
 8 -5 0 94.23 4.48 2
 -8 5 0 214.56 85.59 5
 -8 5 0 97.94 5.3 3
 -8 5 0 101.84 66.25 5
 7 -5 0 67.86 3.36 2
 -7 5 0 29.55 57.01 5
 -7 5 0 71.45 4.11 3
 -7 5 0 158.1 68.15 5
 6 -5 0 182.7 7.72 2
 -6 5 0 182.6 8.94 1
 -6 5 0 178.88 56.31 5
 -6 5 0 180.41 8.79 3
 5 -5 0 463.76 93.21 5
 5 -5 0 592.12 24.05 2
 -5 5 0 614.24 28.82 1
 -5 5 0 591.84 26.43 3
 -5 5 0 510.01 87.67 5
 4 -5 0 -17.57 38.21 5
 -4 5 0 -22.02 41.06 5
 3 -5 0 17.02 1.43 1
 3 -5 0 18.78 33.56 5
 3 -5 0 18.27 1.12 2
 -3 5 0 20.67 1.74 3
 -3 5 0 19.55 1.11 2
 -3 5 0 20.09 1.26 1
 2 -5 0 115.52 43.39 5
 2 -5 0 141.25 7.55 4
 2 -5 0 143.13 7.58 1
 2 -5 0 148.5 6.15 2
 2 -5 0 148.08 7.12 3
 -2 5 0 155.8 7.22 3
 -2 5 0 149.88 6.17 2
 -2 5 0 154.69 7.49 1
 1 -5 0 307.23 57.37 5
 1 -5 0 344.93 13.73 2
 1 -5 0 352.72 16.85 1
 1 -5 0 327.91 16.53 4
 1 -5 0 335.16 15.32 3
 -1 5 0 333 13.75 2
 -1 5 0 392.59 73.75 5
 -1 5 0 347.58 15.4 3
 -1 5 0 354.72 16.81 1
 0 -5 0 4.91 0.69 1
 0 -5 0 21.66 28.6 5
 0 -5 0 2.45 0.64 3
 0 -5 0 3.59 0.87 4
 0 -5 0 3.82 0.31 2
 0 5 0 1.79 22.93 5
 0 5 0 3.44 0.88 3
 0 5 0 3.38 0.67 1
 0 5 0 5.45 0.93 4
 -1 -5 0 117.23 6.54 4
 -1 -5 0 189.31 50.98 5
 -1 -5 0 127.5 6.41 1
 -1 -5 0 113.32 5.9 3
 1 5 0 126.69 6.49 1
 1 5 0 127.04 6.03 3
 1 5 0 128.28 6.48 4
 1 5 0 131.24 45.32 5
 -2 -5 0 419.29 19.38 3
 -2 -5 0 406.91 21.57 4
 -2 -5 0 451.3 78.51 5
 2 5 0 450.97 21.74 1
 2 5 0 445.34 19.47 3
 2 5 0 467.65 21.22 4
 -3 -5 0 1062.16 107.8 5
 -3 -5 0 914.65 40.93 3
 -3 -5 0 939.62 37.54 2
 3 5 0 958.81 40.99 3
 3 5 0 955.08 46 1
 3 5 0 936.54 37.56 2
 -4 -5 0 26.21 1.31 2
 -4 -5 0 -7.43 36.51 5
 4 5 0 28.61 1.98 3
 4 5 0 26.82 2.19 1
 4 5 0 32.48 2.53 4
 4 5 0 -11.27 34.42 5
 4 5 0 25.62 1.35 2
 -5 -5 0 474.11 18.9 2
 -5 -5 0 594.71 115.83 5
 5 5 0 485.42 18.93 2
 5 5 0 429.67 23.35 1
 5 5 0 263.01 69.69 5
 5 5 0 466.5 23.08 4
 5 5 0 501.65 20.82 3
 -6 -5 0 26.94 1.5 2
 -6 -5 0 22.34 64.4 5
 6 5 0 -65.59 50.84 5
 6 5 0 25.11 2.86 4
 6 5 0 28.77 1.56 2
 6 5 0 35.54 2.38 3
 -7 -5 0 64.53 69.51 5
 7 5 0 85.19 88.45 5
 -8 -5 0 -119.95 80.05 5
 -9 -5 0 13.42 103.9 5
 9 5 0 12.82 1.25 2
 9 5 0 17.75 2.92 4
 9 5 0 12.66 1.57 3
 9 5 0 55.71 83.05 5
 -10 -5 0 -74.43 95.38 5
 10 5 0 12.63 88.96 5
 -11 -5 0 -130.39 117.01 5
 11 5 0 3.1 1.12 3
 11 5 0 -0.22 1.83 4
 11 5 0 -150.13 101.25 5
 11 5 0 -0.02 0.83 2
 -12 -5 0 -205.68 167.22 5
 12 5 0 -0.92 2.08 4
 12 5 0 -0.99 0.86 2
 12 5 0 77.21 144.37 5
 12 5 0 0.61 1.02 3
 -13 -5 0 271.1 221.88 5
 13 5 0 77.1 5.87 4
 13 5 0 56.84 3.6 3
 13 5 0 36.63 136.09 5
 13 5 0 64.94 3.5 2
 -14 -5 0 -167.46 188.69 5
 14 5 0 1.46 1 3
 14 5 0 -155.28 144.12 5
 14 5 0 1.7 1.09 2
 14 5 0 1.77 2.29 4
 15 5 0 4.81 1.29 2
 15 5 0 1.98 2.78 4
 15 5 0 2.77 1.09 3
 16 5 0 3.62 1.26 2
 16 5 0 2.83 2.45 4
 16 -6 0 0.67 1.16 2
 16 -6 0 1.22 2.52 4
 15 -6 0 -0.53 1.09 2
 15 -6 0 1.45 2.18 4
 -15 6 0 -33.46 222.26 5
 -14 6 0 176.78 154.97 5
 -14 6 0 -337.31 195.94 5
 13 -6 0 16.6 1.81 2
 13 -6 0 14.28 3.22 4
 -13 6 0 -224.31 276 5
 -13 6 0 147.45 155.93 5
 12 -6 0 12.39 3.03 4
 -12 6 0 -269.21 150.13 5
 -12 6 0 -24.04 109.59 5
 11 -6 0 108.92 5.25 2
 11 -6 0 107.64 7.79 4
 -11 6 0 -22.47 112.01 5
 -11 6 0 116.04 6.16 3
 -11 6 0 92.26 108.95 5
 10 -6 0 294.68 12.4 2
 -10 6 0 285.6 126.26 5
 -10 6 0 329.49 120.95 5
 -10 6 0 292.55 13.86 3
 9 -6 0 397.13 16.78 2
 -9 6 0 416.87 18.65 3
 -9 6 0 539.28 131.65 5
 -9 6 0 312.4 104.55 5
 8 -6 0 14.01 1.42 2
 -8 6 0 -4.13 76.22 5
 -8 6 0 18.96 2.25 3
 -8 6 0 120.91 92.41 5
 7 -6 0 4.31 0.87 2
 -7 6 0 -53.05 66.21 5
 -7 6 0 -9.96 69.19 5
 -7 6 0 6.45 1.52 3
 6 -6 0 43.01 2.4 2
 6 -6 0 51.66 60.36 5
 -6 6 0 46.76 2.4 1
 -6 6 0 46.07 3.15 3
 -6 6 0 20.74 53.07 5
 5 -6 0 7.16 0.88 2
 5 -6 0 10.49 1.08 1
 5 -6 0 70.91 63.69 5
 -5 6 0 7.45 0.78 1
 -5 6 0 11.02 1.59 3
 -5 6 0 21.93 48.35 5
 4 -6 0 402.97 86.32 5
 4 -6 0 340.31 13.91 2
 4 -6 0 309.26 16.86 1
 -4 6 0 345.4 15.61 3
 -4 6 0 311.27 69.15 5
 -4 6 0 369.93 16.68 1
 3 -6 0 9.36 41.69 5
 3 -6 0 60.98 3.7 1
 3 -6 0 67.04 2.97 2
 -3 6 0 71.6 3.9 3
 -3 6 0 68.66 3.54 1
 -3 6 0 65.24 2.96 2
 2 -6 0 653.59 26.21 2
 2 -6 0 694.9 106.47 5
 2 -6 0 636.4 32.12 1
 -2 6 0 695.33 108.06 5
 -2 6 0 644.02 28.9 3
 -2 6 0 681.61 31.85 1
 -2 6 0 654.7 26.25 2
 1 -6 0 1520.09 142.19 5
 1 -6 0 1715.56 81.17 1
 1 -6 0 1664.9 66.78 2
 -1 6 0 1680.41 72.69 3
 -1 6 0 1499.53 139.43 5
 -1 6 0 1688.48 66.82 2
 -1 6 0 1715.9 81.13 1
 0 -6 0 57.67 42.29 5
 0 -6 0 30.49 2.15 1
 0 -6 0 33.57 1.43 2
 0 6 0 34.49 2.58 3
 0 6 0 36.14 35.32 5
 0 6 0 34.06 2.2 1
 -1 -6 0 559.54 92.73 5
 1 6 0 544.83 24.32 3
 1 6 0 543.77 26.64 1
 1 6 0 498.61 85.71 5
 1 6 0 539.25 25.97 4
 -2 -6 0 22.44 33.08 5
 2 6 0 12.89 1.53 1
 2 6 0 10.6 44.2 5
 2 6 0 13.24 1.62 4
 2 6 0 16.21 1.86 3
 -3 -6 0 81.92 47.87 5
 3 6 0 88.48 5.03 4
 3 6 0 82.87 4.51 3
 3 6 0 87.7 4.96 1
 -4 -6 0 321.46 12.98 2
 -4 -6 0 306.05 83.56 5
 4 6 0 331.05 14.62 3
 4 6 0 320.92 13.01 2
 4 6 0 315.92 16.37 1
 4 6 0 242.31 76.6 5
 4 6 0 327.93 16.12 4
 -5 -6 0 26.03 59.3 5
 -5 -6 0 43.36 2.04 2
 5 6 0 49.53 2.9 3
 5 6 0 45.83 2.09 2
 5 6 0 41.91 3.37 4
 5 6 0 43.24 3.16 1
 5 6 0 48.43 42.1 5
 -6 -6 0 -5.77 61.1 5
 -6 -6 0 50.44 2.53 2
 6 6 0 46.7 54.21 5
 6 6 0 59.35 4.18 4
 6 6 0 60.76 3.32 3
 6 6 0 59.09 2.63 2
 -7 -6 0 109.02 85.12 5
 7 6 0 61.63 2.87 2
 7 6 0 56.28 4.4 4
 7 6 0 60.4 53.15 5
 7 6 0 61.42 3.5 3
 -8 -6 0 99.88 86.91 5
 8 6 0 46.99 59.43 5
 -9 -6 0 141.49 106.22 5
 9 6 0 108.04 4.71 2
 9 6 0 28.16 63.37 5
 9 6 0 101.83 5.33 3
 9 6 0 97.08 6.84 4
 -10 -6 0 96.97 135.73 5
 10 6 0 45.11 4.58 4
 10 6 0 83.23 103.72 5
 10 6 0 50.71 2.66 2
 10 6 0 45.7 3.04 3
 -11 -6 0 -39.7 140.84 5
 11 6 0 153.03 6.66 2
 11 6 0 239.59 119.91 5
 11 6 0 144.9 7.3 3
 11 6 0 153.04 9.25 4
 -12 -6 0 79.55 152.99 5
 12 6 0 -0.56 1.95 4
 12 6 0 -116.87 129.52 5
 12 6 0 0.48 1.07 3
 -13 -6 0 310.96 209 5
 13 6 0 36.92 144.38 5
 14 6 0 150.9 237.78 5
 15 6 0 4.26 1.18 3
 15 6 0 2.46 1.23 2
 15 6 0 3.86 2.54 4
 16 -7 0 1.43 1.22 2
 16 -7 0 5.66 2.7 4
 15 -7 0 13.71 3.58 4
 15 -7 0 17.42 1.97 2
 14 -7 0 8.81 1.53 2
 14 -7 0 4.16 2.89 4
 -14 7 0 -4.24 187.46 5
 13 -7 0 -1.08 2.43 4
 13 -7 0 -0.55 0.96 2
 -13 7 0 -188.37 162.6 5
 -13 7 0 -85.09 161.92 5
 12 -7 0 66.7 3.77 2
 12 -7 0 73.82 6.35 4
 -12 7 0 -14.11 145.26 5
 -12 7 0 80.37 6.18 3
 -12 7 0 62.37 145.41 5
 11 -7 0 29.19 2.25 2
 11 -7 0 32.02 4.5 4
 -11 7 0 39.22 135.17 5
 -11 7 0 30.53 3.13 3
 -11 7 0 -30.77 114.61 5
 -10 7 0 61.62 126.25 5
 -10 7 0 71.98 97.73 5
 -9 7 0 26.08 86.83 5
 -9 7 0 -62.36 81.98 5
 -8 7 0 -81.25 81.7 5
 -8 7 0 -29.82 72.18 5
 7 -7 0 420.89 17.32 2
 -7 7 0 388.31 105.11 5
 -7 7 0 425.92 19.32 3
 6 -7 0 -26.74 71.45 5
 6 -7 0 0.31 0.63 2
 -6 7 0 -0.53 0.89 3
 -6 7 0 104.33 79.79 5
 -6 7 0 0.1 0.37 1
 5 -7 0 44.05 60.66 5
 5 -7 0 0.62 0.64 2
 5 -7 0 3.67 0.85 1
 -5 7 0 2.82 0.59 1
 -5 7 0 4.52 1.34 3
 -5 7 0 -30.04 49.25 5
 4 -7 0 462.84 18.01 2
 4 -7 0 387.66 21.84 1
 4 -7 0 518.63 103.91 5
 -4 7 0 446.11 20.1 3
 -4 7 0 477.19 21.68 1
 3 -7 0 470.02 25.6 1
 3 -7 0 527.64 21.02 2
 3 -7 0 677.67 117.54 5
 -3 7 0 507.86 21.04 2
 -3 7 0 551.7 25.48 1
 -3 7 0 552.51 23.48 3
 2 -7 0 0.35 0.66 1
 2 -7 0 -0.02 0.39 2
 2 -7 0 10.5 48.87 5
 -2 7 0 -22.59 39.86 5
 -2 7 0 0.63 0.64 1
 -2 7 0 -0.12 0.36 2
 -2 7 0 1.1 0.94 3
 1 -7 0 43.88 45.67 5
 1 -7 0 67.73 2.86 2
 -1 7 0 100.78 44.99 5
 -1 7 0 70.51 4.04 1
 -1 7 0 71.5 3.97 3
 -1 7 0 62.2 2.88 2
 0 -7 0 174.48 56.74 5
 0 7 0 240.87 12.1 1
 0 7 0 231.23 11.21 3
 0 7 0 292.05 71.28 5
 0 7 0 245.62 11.99 4
 -1 -7 0 -33 45.66 5
 1 7 0 2.84 1.01 3
 1 7 0 38.48 39.05 5
 1 7 0 3.55 1.1 4
 -2 -7 0 10.54 38.42 5
 2 7 0 21.72 1.88 3
 2 7 0 36.51 45.23 5
 2 7 0 17.08 1.88 1
 2 7 0 18.31 2.03 4
 -3 -7 0 -21.21 39.55 5
 3 7 0 1.36 0.94 3
 3 7 0 3.12 1.13 1
 3 7 0 0.67 1.05 4
 -4 -7 0 -97.41 42.45 5
 -5 -7 0 607.26 24.38 2
 -5 -7 0 747.26 130.52 5
 5 7 0 570.52 30.23 1
 5 7 0 605.19 29.59 4
 5 7 0 670.6 124.98 5
 5 7 0 637.74 27.02 3
 5 7 0 621.37 24.43 2
 -6 -7 0 23 65.33 5
 6 7 0 25.51 72.46 5
 -7 -7 0 47.22 75.8 5
 -7 -7 0 20.74 1.28 2
 7 7 0 22.33 2.75 4
 7 7 0 69.93 80.79 5
 7 7 0 24.08 2.13 3
 7 7 0 22.77 1.63 2
 -8 -7 0 326.34 122.54 5
 8 7 0 94.4 68.6 5
 8 7 0 138.56 6.08 2
 8 7 0 144.54 8.38 4
 8 7 0 144.08 7.06 3
 -9 -7 0 73.14 116.87 5
 9 7 0 233.69 9.97 2
 9 7 0 248.46 11.2 3
 9 7 0 77.96 73.9 5
 10 7 0 74 101.81 5
 -11 -7 0 3.56 154.28 5
 11 7 0 15.26 1.79 3
 11 7 0 -6.57 115.83 5
 11 7 0 13.03 1.39 2
 11 7 0 11.01 2.72 4
 -12 -7 0 250.35 169.26 5
 12 7 0 -209.08 158.63 5
 12 7 0 1.04 1.04 3
 12 7 0 2.01 1.02 2
 12 7 0 4.11 2.24 4
 -13 -7 0 328.53 226.18 5
 13 7 0 5.16 1.29 3
 13 7 0 3.63 2.19 4
 13 7 0 -43.95 149.57 5
 13 7 0 3.44 1.11 2
 14 7 0 4.08 1.26 2
 14 7 0 0.85 1.03 3
 14 7 0 2.52 2.3 4
 15 7 0 0.23 2.27 4
 15 7 0 1.25 1.14 2
 15 7 0 0.49 1.07 3
 15 -8 0 6.05 3.07 4
 15 -8 0 5.17 1.42 2
 -14 8 0 716.1 324.53 5
 13 -8 0 9.57 3.25 4
 13 -8 0 3.48 1.22 2
 -13 8 0 10.28 177.76 5
 -12 8 0 249.94 180.96 5
 -12 8 0 113.88 172.71 5
 11 -8 0 5.41 1.2 2
 11 -8 0 8.51 2.98 4
 -11 8 0 -14.89 150.17 5
 -11 8 0 9.48 2.16 3
 -11 8 0 63.67 131.76 5
 10 -8 0 21.27 1.84 2
 -10 8 0 17.21 2.34 3
 -10 8 0 94.88 104.53 5
 -10 8 0 -60.03 104.68 5
 9 -8 0 56.49 3.92 2
 -9 8 0 123.98 100.31 5
 -9 8 0 53.97 3.89 3
 -9 8 0 117.99 103.25 5
 8 -8 0 -0.1 0.87 2
 -8 8 0 2.28 1.39 3
 -8 8 0 -8.63 81.4 5
 -8 8 0 -18.39 82.19 5
 7 -8 0 -18.16 80.56 5
 -7 8 0 43.96 75.97 5
 6 -8 0 255.29 10.02 2
 6 -8 0 138.47 78 5
 6 -8 0 211.46 11.96 1
 -6 8 0 254.64 11.6 3
 -6 8 0 240.03 11.73 1
 -6 8 0 254.04 83.52 5
 5 -8 0 154.4 87.59 5
 -5 8 0 99.43 84.42 5
 4 -8 0 14.35 1.16 2
 4 -8 0 14.05 1.56 1
 4 -8 0 27.99 60.62 5
 -4 8 0 15.64 2.01 3
 -4 8 0 13.98 1.27 1
 3 -8 0 7.97 0.82 2
 3 -8 0 52.19 57.53 5
 3 -8 0 5.67 1.15 1
 -3 8 0 -23.95 50.58 5
 -3 8 0 6.41 1.48 3
 -3 8 0 6.49 0.78 2
 -3 8 0 9.63 1.14 1
 2 -8 0 234.25 9.39 2
 2 -8 0 301.5 88.99 5
 -2 8 0 224.92 9.41 2
 -2 8 0 235.2 11.6 1
 -2 8 0 223.31 10.98 3
 -2 8 0 196.01 71.55 5
 1 -8 0 82.07 56.87 5
 1 -8 0 106.6 4.37 2
 -1 8 0 105.52 5.69 3
 -1 8 0 178.7 72.57 5
 -1 8 0 101.12 4.4 2
 -1 8 0 107.95 5.72 1
 0 -8 0 16.32 52.76 5
 0 8 0 49.08 43.98 5
 0 8 0 46.35 3.17 3
 0 8 0 45.5 2.99 1
 0 8 0 46.07 3.19 4
 -1 -8 0 123.05 61.5 5
 1 8 0 136.38 64.37 5
 -2 -8 0 125.94 65.47 5
 2 8 0 66.83 4.38 4
 2 8 0 72.73 4.38 1
 2 8 0 76.68 4.26 3
 2 8 0 10.84 43.13 5
 -3 -8 0 70.22 61.38 5
 3 8 0 71.16 4.42 4
 3 8 0 87.87 71.42 5
 3 8 0 66.94 4.31 1
 3 8 0 68.89 4.05 3
 -4 -8 0 90.5 52.17 5
 4 8 0 41.23 2.76 3
 4 8 0 38.4 3.07 4
 4 8 0 31.38 2.87 1
 -5 -8 0 9.6 58.84 5
 5 8 0 2.71 1.29 1
 5 8 0 3.13 1.49 4
 5 8 0 4.85 1.38 3
 -6 -8 0 170.66 82.86 5
 -6 -8 0 81.47 3.51 2
 6 8 0 22.22 54.09 5
 6 8 0 79.77 5.31 4
 6 8 0 82.18 3.55 2
 6 8 0 82.74 4.62 3
 -7 -8 0 3.96 0.6 2
 -7 -8 0 -2.7 91.82 5
 7 8 0 4.98 1.37 3
 7 8 0 27.69 83.41 5
 7 8 0 2.33 1.66 4
 7 8 0 4.14 0.7 2
 -8 -8 0 16.31 90.74 5
 8 8 0 1.58 0.65 2
 8 8 0 1.89 1.84 4
 8 8 0 -50.81 92.79 5
 8 8 0 2.53 1.23 3
 -9 -8 0 13.54 118.48 5
 9 8 0 18.65 2.91 4
 9 8 0 21.42 2.22 3
 9 8 0 50.3 77.72 5
 9 8 0 16.81 1.45 2
 -10 -8 0 84.86 123.65 5
 10 8 0 -266.73 116.54 5
 -11 -8 0 55.55 158.81 5
 11 8 0 -0.18 98.01 5
 11 8 0 17.96 1.54 2
 11 8 0 15.1 1.92 3
 11 8 0 13.66 2.89 4
 -12 -8 0 -99.65 197.46 5
 12 8 0 -0.36 1.98 4
 12 8 0 2.19 1.08 3
 12 8 0 2.11 0.9 2
 12 8 0 -10.34 129.75 5
 13 8 0 8.46 2.66 4
 13 8 0 4.16 1.22 3
 13 8 0 4.87 1.14 2
 14 8 0 0.06 2.15 4
 14 8 0 1.81 1.05 2
 14 8 0 3.15 1.98 3
 15 -9 0 0.86 1.15 2
 15 -9 0 4.99 2.94 4
 14 -9 0 1.91 1.19 2
 14 -9 0 2.07 3.29 4
 13 -9 0 1.19 2.71 4
 13 -9 0 1.2 1.13 2
 -13 9 0 0.7 1.56 3
 -13 9 0 -76.19 183.49 5
 12 -9 0 92.56 7.34 4
 12 -9 0 79.27 4.31 2
 -12 9 0 129.76 167 5
 -12 9 0 88.95 5.4 3
 11 -9 0 11.76 1.57 2
 -11 9 0 -118.65 145.39 5
 -11 9 0 13.02 2.38 3
 -11 9 0 159.96 140.5 5
 10 -9 0 140.29 6.39 2
 -10 9 0 140.64 7.66 3
 -10 9 0 244.6 170.09 5
 -9 9 0 -105.14 110.38 5
 -9 9 0 89.53 106.18 5
 8 -9 0 83.03 3.9 2
 -8 9 0 -11.16 80.86 5
 -8 9 0 71.32 4.82 3
 7 -9 0 76.35 3.68 2
 7 -9 0 151.45 99.77 5
 -7 9 0 73.6 4.76 3
 -7 9 0 74.62 3.87 1
 -7 9 0 -5.37 80.75 5
 6 -9 0 0.4 0.82 1
 6 -9 0 26.49 81.31 5
 6 -9 0 -0.07 0.77 2
 -6 9 0 -10.94 69.22 5
 -6 9 0 -0.97 1.19 3
 5 -9 0 19.98 1.77 1
 5 -9 0 16.04 80.28 5
 5 -9 0 18.05 1.5 2
 -5 9 0 21.53 1.58 1
 -5 9 0 23.25 2.52 3
 4 -9 0 50.7 2.37 2
 4 -9 0 36.2 3.14 1
 4 -9 0 14.11 71.31 5
 -4 9 0 92.84 71.67 5
 -4 9 0 55.39 3.55 3
 3 -9 0 90.68 3.88 2
 3 -9 0 55.81 68.72 5
 -3 9 0 88 4.83 1
 -3 9 0 160.49 70.2 5
 -3 9 0 82.79 3.87 2
 -3 9 0 94.72 5.25 3
 2 -9 0 176.29 7.13 2
 2 -9 0 87 67.43 5
 -2 9 0 75.19 56.82 5
 -2 9 0 179.56 8.73 3
 -2 9 0 153.91 7.14 2
 -2 9 0 187.31 8.98 1
 1 -9 0 273.53 70.9 5
 1 -9 0 454.64 18.46 2
 -1 9 0 477.97 21.01 3
 -1 9 0 465.37 22.85 1
 -1 9 0 415.08 86.26 5
 0 -9 0 205.69 73.68 5
 0 9 0 333.14 15.79 3
 0 9 0 423.47 101.07 5
 0 9 0 350.94 17.19 1
 -1 -9 0 58.82 55.28 5
 1 9 0 18.84 51.05 5
 -2 -9 0 417.94 98.6 5
 2 9 0 321.7 16.76 1
 2 9 0 329.17 16.41 4
 2 9 0 349.62 93.11 5
 2 9 0 337.7 15.31 3
 -3 -9 0 -29.47 57.72 5
 3 9 0 3.61 1.42 4
 3 9 0 -18.96 47.2 5
 3 9 0 6.7 1.5 3
 3 9 0 5.23 1.43 1
 -4 -9 0 -10.86 60.58 5
 4 9 0 42.29 51.09 5
 -5 -9 0 83.75 67.83 5
 5 9 0 16.33 1.95 3
 5 9 0 12.69 2.06 1
 5 9 0 18.94 2.49 4
 -6 -9 0 -6.39 75.6 5
 6 9 0 -160.94 81.47 5
 -7 -9 0 -1.78 92.35 5
 7 9 0 -19.1 69.82 5
 -8 -9 0 78.87 103.72 5
 -8 -9 0 9.91 0.88 2
 8 9 0 10.81 0.99 2
 8 9 0 11.12 1.78 3
 8 9 0 -28.56 79.46 5
 8 9 0 8.17 2.2 4
 -9 -9 0 118.89 115.15 5
 9 9 0 92.01 123.21 5
 -10 -9 0 42.08 138.71 5
 10 9 0 41.53 3.01 3
 10 9 0 41.17 2.31 2
 10 9 0 200.67 139.75 5
 10 9 0 40.87 4.21 4
 -11 -9 0 85.68 159.48 5
 11 9 0 156.98 141.13 5
 12 9 0 13.84 2.99 4
 12 9 0 -56.99 184.69 5
 12 9 0 6.15 1.79 3
 13 9 0 2.53 0.98 2
 13 9 0 -0.35 1.11 3
 13 9 0 2.5 2.14 4
 14 9 0 3.57 2.27 4
 14 9 0 6.64 1.47 3
 14 9 0 6.12 1.24 2
 14 -10 0 3.95 2.94 4
 14 -10 0 4.9 1.42 2
 -14 10 0 10.53 1.96 3
 13 -10 0 31.68 2.54 2
 13 -10 0 13.37 3.86 4
 -13 10 0 36.59 3.62 3
 -12 10 0 -102.59 185.73 5
 -11 10 0 90.89 157.05 5
 10 -10 0 1.24 1.03 2
 -10 10 0 -44.54 123.2 5
 -10 10 0 -0.27 1.45 3
 -10 10 0 -185.78 118.2 5
 -9 10 0 -62.16 133.83 5
 -9 10 0 -60.57 111.98 5
 8 -10 0 48.19 2.78 2
 -8 10 0 55.81 3.96 3
 -8 10 0 157.04 102.92 5
 7 -10 0 22.37 1.82 2
 7 -10 0 96.4 101.28 5
 -7 10 0 62.77 93.42 5
 -7 10 0 29.67 3.28 3
 -7 10 0 24.05 1.58 1
 6 -10 0 14.76 1.42 2
 6 -10 0 49.03 94.05 5
 6 -10 0 16.15 1.8 1
 -6 10 0 17.84 1.4 1
 -6 10 0 16.6 2.42 3
 5 -10 0 47.04 2.57 2
 5 -10 0 99.56 94.71 5
 -5 10 0 52.56 3.78 3
 -5 10 0 66.76 87.11 5
 -5 10 0 49.64 3.02 1
 4 -10 0 415.96 16.72 2
 4 -10 0 248.57 102.37 5
 -4 10 0 402.86 18.99 3
 -4 10 0 408.77 117.85 5
 -4 10 0 415.59 20.31 1
 3 -10 0 -14.9 68.74 5
 -3 10 0 -99.13 62.32 5
 2 -10 0 52.43 71.83 5
 -2 10 0 -75.15 58.01 5
 1 -10 0 22.44 60.03 5
 1 -10 0 29.67 1.41 2
 -1 10 0 32.94 3.14 3
 -1 10 0 -2.01 57.01 5
 -1 10 0 28.46 2.42 1
 0 -10 0 -2.97 66.04 5
 0 10 0 2.57 1.06 1
 0 10 0 3.23 1.36 3
 0 10 0 -31.84 53.07 5
 -1 -10 0 31.51 64.63 5
 1 10 0 28.55 2.66 4
 1 10 0 26.43 2.67 3
 1 10 0 23.85 2.34 1
 1 10 0 18.34 59.93 5
 -2 -10 0 243.29 87.54 5
 2 10 0 208.23 11.28 1
 2 10 0 143.59 63.2 5
 2 10 0 218.35 10.47 3
 2 10 0 215.76 11.1 4
 -3 -10 0 158.36 84.19 5
 3 10 0 163.45 8.23 3
 3 10 0 160.57 8.94 1
 3 10 0 163.09 8.79 4
 3 10 0 120.03 66.75 5
 -4 -10 0 585.62 130.53 5
 4 10 0 369.63 19.61 1
 4 10 0 385.81 19.14 4
 4 10 0 311.9 92.3 5
 4 10 0 399.26 17.75 3
 -5 -10 0 57.88 74.91 5
 5 10 0 123.97 7.78 1
 5 10 0 148.01 7.23 3
 5 10 0 30.88 81.02 5
 5 10 0 141.81 7.83 4
 -6 -10 0 57.4 77.35 5
 6 10 0 60.66 4 3
 -7 -10 0 107.2 109.15 5
 7 10 0 29.42 2.88 3
 7 10 0 25.25 3.12 4
 7 10 0 10.66 93.58 5
 -8 -10 0 180.55 122.8 5
 8 10 0 15.78 118.72 5
 8 10 0 183.02 9.12 3
 8 10 0 185.91 10.26 4
 -9 -10 0 -33.93 125.39 5
 9 10 0 8.55 2.26 4
 9 10 0 11.4 1.12 2
 9 10 0 63.29 107.26 5
 9 10 0 10.37 1.91 3
 -10 -10 0 92.55 153.91 5
 10 10 0 79.34 144.24 5
 -11 -10 0 -13.49 168.89 5
 11 10 0 13.83 2.89 4
 11 10 0 5.32 138.39 5
 12 10 0 -0.9 1.17 3
 12 10 0 3.74 0.87 2
 12 10 0 0.32 2.09 4
 13 10 0 32.45 3.82 4
 13 10 0 27.82 1.97 2
 13 10 0 17.33 2.25 3
 14 -11 0 9.69 3.44 4
 14 -11 0 14.56 1.86 2
 -14 11 0 18.67 2.55 3
 13 -11 0 3.82 3.31 4
 13 -11 0 3.17 2.04 2
 -13 11 0 3.25 1.92 3
 12 -11 0 12.5 3.63 4
 12 -11 0 11.73 1.63 2
 -12 11 0 13.07 2.42 3
 -11 11 0 -77.6 153.26 5
 -10 11 0 -137.49 146.2 5
 -9 11 0 8.78 146.41 5
 -9 11 0 -105.22 112.4 5
 8 -11 0 -2.07 0.94 2
 -8 11 0 -0.84 1.46 3
 -8 11 0 5.97 106.03 5
 7 -11 0 217.53 123.14 5
 7 -11 0 147.8 6.14 2
 7 -11 0 121.4 7.39 1
 -7 11 0 145.48 7.67 3
 6 -11 0 -99.32 102.55 5
 5 -11 0 -22.66 102.27 5
 -5 11 0 12.95 2.62 3
 -5 11 0 -112.84 79.53 5
 4 -11 0 22.12 77.31 5
 4 -11 0 69.69 3.33 2
 -4 11 0 69.71 4.73 3
 -4 11 0 122.69 100.2 5
 -4 11 0 72.71 4.17 1
 3 -11 0 222.69 111.06 5
 3 -11 0 145.81 6.17 2
 -3 11 0 150.14 7.65 3
 -3 11 0 122.36 5.86 2
 -3 11 0 144.2 7.47 1
 -3 11 0 106.79 75.33 5
 2 -11 0 50.05 79.53 5
 2 -11 0 75.8 3.25 2
 -2 11 0 59.14 64.92 5
 -2 11 0 69.49 4.45 1
 -2 11 0 78.15 4.82 3
 1 -11 0 -62.87 74.84 5
 -1 11 0 16.19 70.5 5
 -1 11 0 8.9 1.86 3
 0 -11 0 -47.13 72.54 5
 0 11 0 -36.66 70.71 5
 0 11 0 1.81 1.18 1
 0 11 0 2.34 1.37 3
 -1 -11 0 -5.13 74.19 5
 1 11 0 -0.06 1.21 3
 1 11 0 -56.87 65.07 5
 1 11 0 -0.74 1.19 1
 1 11 0 -0.86 1.12 4
 -2 -11 0 435.9 116.09 5
 2 11 0 370.7 17.03 3
 2 11 0 373.05 18.21 4
 2 11 0 353.62 18.62 1
 2 11 0 282.75 83.61 5
 -3 -11 0 13.45 78.53 5
 3 11 0 65.15 74.88 5
 -4 -11 0 38.26 74.94 5
 4 11 0 10.53 79.01 5
 -5 -11 0 148.61 86.1 5
 5 11 0 136.01 8.23 4
 5 11 0 161.26 7.84 3
 5 11 0 114.28 78.19 5
 -6 -11 0 160.22 102.61 5
 6 11 0 62.95 4.08 3
 6 11 0 56.35 4.59 4
 6 11 0 97.69 100.06 5
 -7 -11 0 -95.44 105.58 5
 7 11 0 3.05 1.91 4
 -8 -11 0 -57.26 133.81 5
 8 11 0 50.52 147.53 5
 8 11 0 10.97 1.98 3
 -9 -11 0 102.02 137.64 5
 9 11 0 -50.06 109.97 5
 9 11 0 -1.4 1.71 4
 9 11 0 -1.02 1.37 3
 -10 -11 0 -163.58 171.51 5
 10 11 0 116.27 160.09 5
 11 11 0 9 2.55 4
 11 11 0 12.23 1.99 3
 12 11 0 9.49 2.55 4
 12 11 0 9.03 1.78 3
 13 -12 0 -0.2 2.91 4
 13 -12 0 3.83 1.28 2
 -13 12 0 4.55 1.81 3
 12 -12 0 20.13 2.07 2
 -12 12 0 23.73 3.05 3
 11 -12 0 10.27 1.58 2
 -11 12 0 11.81 2.49 3
 10 -12 0 4.73 1.32 2
 -10 12 0 -9.82 169.78 5
 -10 12 0 7.5 2.14 3
 -9 12 0 317.85 161.74 5
 8 -12 0 26.2 2.14 2
 -8 12 0 27.44 3.18 3
 7 -12 0 5.39 1.06 1
 7 -12 0 13.83 128.9 5
 7 -12 0 5.21 1.14 2
 -7 12 0 10.35 2.3 3
 -7 12 0 65.57 213.74 5
 6 -12 0 -46.17 115.34 5
 6 -12 0 0.39 0.82 2
 -6 12 0 -54.94 95.91 5
 -6 12 0 1.52 1.58 3
 5 -12 0 -0.61 0.73 2
 5 -12 0 -160.02 111.51 5
 -5 12 0 -58.63 85.66 5
 -5 12 0 -1.03 0.67 1
 -5 12 0 -0.5 1.31 3
 4 -12 0 6.8 89.98 5
 4 -12 0 3.96 0.82 2
 -4 12 0 -73.79 86.83 5
 -4 12 0 4.91 1.23 1
 -4 12 0 7.55 1.87 3
 3 -12 0 -114.35 87.38 5
 3 -12 0 0.15 0.56 2
 -3 12 0 3.93 86.05 5
 -3 12 0 0.11 1.09 1
 -3 12 0 -0.6 1.34 3
 2 -12 0 -47.86 100.27 5
 -2 12 0 16.61 77.6 5
 1 -12 0 -7.47 99.15 5
 -1 12 0 5.08 1.62 3
 -1 12 0 2.59 1.21 1
 -1 12 0 -1.98 73.19 5
 0 -12 0 259.78 101.15 5
 0 12 0 124.33 7.25 1
 0 12 0 132.43 7.13 3
 0 12 0 171.66 100.56 5
 -1 -12 0 203.61 87.44 5
 1 12 0 136.06 90.17 5
 1 12 0 107.33 6.17 3
 1 12 0 104.96 6.38 1
 -2 -12 0 117.56 91.45 5
 2 12 0 53.93 3.91 4
 2 12 0 49.66 3.74 3
 2 12 0 42.58 3.6 1
 2 12 0 -66.02 82.55 5
 -3 -12 0 -65.22 94.35 5
 3 12 0 27.34 2.97 4
 3 12 0 37.74 80.06 5
 3 12 0 27.38 2.98 3
 3 12 0 20.49 2.64 1
 -4 -12 0 31.81 105.55 5
 4 12 0 -17.57 93.44 5
 4 12 0 -0.03 1.42 4
 4 12 0 0.96 1.42 3
 -5 -12 0 -88.37 99.73 5
 5 12 0 75.4 108.51 5
 5 12 0 0.53 1.41 4
 5 12 0 0.09 1.41 3
 -6 -12 0 33.18 107.67 5
 6 12 0 -51.02 108.59 5
 -7 -12 0 -173.02 122.35 5
 7 12 0 94.76 102.76 5
 -8 -12 0 96.33 148.14 5
 -9 -12 0 315.42 297.7 5
 10 12 0 15.97 2.9 4
 10 12 0 19.29 2.45 3
 11 12 0 9.45 2.78 4
 11 12 0 10.63 1.93 3
 12 -13 0 3.36 1.31 2
 11 -13 0 6.7 1.45 2
 -11 13 0 4.26 1.9 3
 10 -13 0 10.03 1.5 2
 -10 13 0 6.51 2.22 3
 9 -13 0 59.8 3.42 2
 -9 13 0 62.31 4.88 3
 8 -13 0 -71.73 145.41 5
 -8 13 0 -95.68 128.1 5
 7 -13 0 40.44 138.21 5
 -7 13 0 110.56 120.34 5
 6 -13 0 -73.03 131.95 5
 -6 13 0 135.19 121.1 5
 -6 13 0 8.74 2.24 3
 5 -13 0 -119.03 127.23 5
 -5 13 0 -95.47 120.57 5
 -5 13 0 11.49 2.27 3
 4 -13 0 141.57 103.84 5
 4 -13 0 0.6 0.68 2
 -4 13 0 1.49 1.54 3
 -4 13 0 -115.8 108.16 5
 -4 13 0 -0.98 0.95 1
 3 -13 0 97.07 110.8 5
 -3 13 0 45.04 99.55 5
 2 -13 0 88.44 112.49 5
 -2 13 0 25.28 3.16 3
 -2 13 0 25.52 2.63 1
 -2 13 0 40.22 83.46 5
 1 -13 0 205.47 118.54 5
 -1 13 0 78.37 4.99 1
 -1 13 0 80.93 5.21 3
 -1 13 0 29.61 93.27 5
 0 -13 0 161.84 109.63 5
 0 13 0 187.71 9.13 3
 0 13 0 160.18 9.41 1
 0 13 0 225.65 111.02 5
 -1 -13 0 -90.49 93.16 5
 1 13 0 -77.28 88.55 5
 1 13 0 2.31 1.69 3
 1 13 0 -0.7 1.27 1
 -2 -13 0 -202.46 92.69 5
 2 13 0 20.28 101.56 5
 2 13 0 1.56 1.55 4
 2 13 0 0.67 1.6 3
 2 13 0 -0.95 1.24 1
 -3 -13 0 89.58 104.94 5
 3 13 0 19.17 2.64 3
 3 13 0 5.97 91.21 5
 3 13 0 13.24 2.3 4
 -4 -13 0 169.82 118.23 5
 4 13 0 8.96 1.99 4
 4 13 0 9.96 95.47 5
 4 13 0 7.35 1.87 3
 -5 -13 0 -10.3 115.08 5
 5 13 0 4.84 1.68 3
 5 13 0 -207.65 114.68 5
 5 13 0 5.11 1.88 4
 -6 -13 0 96.27 121.96 5
 6 13 0 -189.56 127.85 5
 -7 -13 0 99.35 167.03 5
 7 13 0 44.68 4.12 4
 7 13 0 49.41 3.82 3
 7 13 0 -32.72 157.19 5
 8 13 0 27.18 3.08 3
 8 13 0 31.95 3.46 4
 9 13 0 10.14 2.02 3
 9 13 0 9.18 2.41 4
 10 13 0 3.61 1.59 3
 10 13 0 3.37 2.07 4
 11 -14 0 22.03 2.12 2
 -11 14 0 23.27 3.15 3
 10 -14 0 63.88 3.42 2
 -10 14 0 49.22 5.82 3
 9 -14 0 5.94 1.28 2
 -9 14 0 5.14 2.14 3
 -8 14 0 -151.01 163.71 5
 -8 14 0 11.88 2.45 3
 7 -14 0 -131.57 169.3 5
 -7 14 0 -6.73 146.92 5
 6 -14 0 -245.34 146.59 5
 6 -14 0 -1.09 0.82 2
 -6 14 0 -41.24 123.06 5
 -6 14 0 -1.73 1.69 3
 5 -14 0 6.56 1.07 2
 5 -14 0 -189.29 148.77 5
 -5 14 0 2.69 112.11 5
 -5 14 0 7.55 2.17 3
 4 -14 0 26.37 135.63 5
 4 -14 0 60.67 2.88 2
 -4 14 0 112.91 135.23 5
 -4 14 0 57.77 4.55 3
 3 -14 0 -58.44 195 5
 3 -14 0 0.45 0.54 2
 -3 14 0 -1.34 1.59 3
 -3 14 0 -112.52 98.93 5
 2 -14 0 -5.33 161.32 5
 -2 14 0 108.42 119.78 5
 1 -14 0 -6.43 124.36 5
 -1 14 0 6.98 2 3
 -1 14 0 12.29 114.56 5
 -1 14 0 3.25 1.55 1
 0 -14 0 -0.58 119.74 5
 0 14 0 1.21 115.82 5
 -1 -14 0 58.24 108.98 5
 1 14 0 68.45 100.66 5
 1 14 0 111.36 6.52 3
 -2 -14 0 41.55 124.42 5
 2 14 0 -24.76 97.49 5
 -3 -14 0 197.64 135.09 5
 3 14 0 98.2 106.8 5
 4 14 0 2.02 1.62 4
 4 14 0 0.04 112.69 5
 4 14 0 4.42 1.76 3
 -5 -14 0 -11.44 136.08 5
 5 14 0 8.58 2.16 3
 5 14 0 -108.11 115.88 5
 5 14 0 4.97 1.92 4
 -6 -14 0 77.76 148.02 5
 6 14 0 175.87 173.89 5
 7 14 0 0.87 1.52 3
 7 14 0 -1.41 1.73 4
 8 14 0 -0.03 1.63 4
 8 14 0 -2.24 1.35 3
 9 14 0 11.12 2.08 3
 9 14 0 14.24 2.57 4
 10 -15 0 3.83 1.25 2
 -10 15 0 3.44 2.1 3
 9 -15 0 16.66 1.79 2
 -9 15 0 9.91 2.49 3
 8 -15 0 10.52 1.44 2
 7 -15 0 3.73 1.11 2
 -7 15 0 5.64 1.9 3
 6 -15 0 11.32 1.29 2
 -6 15 0 9.27 2.37 3
 -6 15 0 34.51 188.38 5
 5 -15 0 -298.17 174.86 5
 5 -15 0 1.04 0.74 2
 -5 15 0 -95 123.77 5
 -5 15 0 2.43 1.84 3
 4 -15 0 -176.92 154.62 5
 -4 15 0 1.05 1.64 3
 -4 15 0 4.68 164.92 5
 3 -15 0 -16.47 128.25 5
 -3 15 0 -191.32 220.41 5
 -3 15 0 0.9 1.85 3
 2 -15 0 57.07 147.03 5
 -2 15 0 -3.83 118.25 5
 1 -15 0 -115.09 144.22 5
 -1 15 0 125.38 130.56 5
 -1 15 0 18.86 2.89 3
 0 -15 0 -145.3 139.35 5
 0 15 0 67.44 113.86 5
 0 15 0 0.31 1.85 3
 -1 -15 0 61.28 132.77 5
 1 15 0 22.51 112.21 5
 1 15 0 27.14 3.33 3
 -2 -15 0 79.78 148.45 5
 2 15 0 257.17 139.78 5
 -3 -15 0 58.57 142.47 5
 3 15 0 47.95 118.68 5
 -4 -15 0 -67.49 157.78 5
 4 15 0 -208.64 150.82 5
 4 15 0 4.1 2.04 4
 4 15 0 4.54 1.8 3
 5 15 0 10.9 2.32 4
 5 15 0 2.53 1.71 3
 6 15 0 3.35 1.81 4
 6 15 0 4.57 1.86 3
 7 15 0 -0.92 1.67 3
 7 15 0 2.6 1.9 4
 8 15 0 2.06 1.73 3
 8 15 0 4.31 2.01 4
 8 -16 0 6.74 1.26 2
 -8 16 0 7.14 2.42 3
 7 -16 0 2.52 1 2
 -7 16 0 2.89 2.04 3
 6 -16 0 26.5 1.82 2
 -6 16 0 20.21 3.2 3
 5 -16 0 98.95 4.85 2
 -4 16 0 5.82 2.25 3
 -3 16 0 3.38 2.06 3
 -2 16 0 49.96 4.31 3
 -1 16 0 3.89 1.79 3
 0 16 0 0.51 1.72 3
 1 16 0 6.14 2.24 3
 2 16 0 4.14 2.03 3
 3 16 0 11.74 2.36 3
 4 16 0 11.54 2.41 3
 5 16 0 3.23 1.97 4
 5 16 0 7.83 2.04 3
 6 16 0 8.09 2.15 4
 -6 17 0 1.51 1.89 3
 -5 17 0 23.42 3.58 3
 -4 17 0 70.36 5.24 3
 -3 17 0 17.94 3.01 3
 -2 17 0 -1.43 1.86 3
 -1 17 0 21 3.15 3
 0 17 0 22.99 3.32 3
 1 17 0 10.97 2.42 3
 2 17 0 3.52 1.95 3
 3 17 0 -0.95 1.58 3
 4 17 0 12.97 2.41 3
 3 17 -1 34.86 3.74 3
 2 17 -1 4.9 2 3
 1 17 -1 0.57 1.88 3
 -1 17 -1 4.27 1.88 3
 -2 17 -1 -2 1.67 3
 -3 17 -1 1.36 1.99 3
 -4 17 -1 1.84 2.2 3
 -5 17 -1 7.7 2.45 3
 6 16 -1 13.8 2.5 4
 6 16 -1 10.22 3.17 3
 5 16 -1 24.3 3.53 3
 5 16 -1 30.54 3.44 4
 4 16 -1 11.68 2.43 3
 3 16 -1 6.22 2.13 3
 2 16 -1 1.14 1.92 3
 1 16 -1 4.21 2.16 3
 0 16 -1 -2.41 1.65 3
 -1 16 -1 13.51 2.54 3
 -2 16 -1 1.73 1.99 3
 -3 16 -1 8.38 2.32 3
 -5 16 -1 32.54 3.84 3
 -6 16 -1 9.31 2.47 3
 -7 16 -1 6.78 2.28 3
 7 -16 1 7.51 1.18 2
 -8 16 -1 31.05 3.83 3
 8 -16 1 42.35 2.52 2
 7 15 -1 -1.92 1.48 3
 7 15 -1 1.36 1.91 4
 6 15 -1 4.19 3.53 4
 6 15 -1 7.89 2.1 3
 5 15 -1 5.73 1.93 3
 5 15 -1 5.3 2.01 4
 4 15 -1 1.6 1.59 3
 4 15 -1 -0.65 1.68 4
 3 15 -1 -135.59 148.17 5
 3 15 -1 6.63 2 3
 -3 -15 1 -3.9 135.35 5
 2 15 -1 10.86 127.62 5
 2 15 -1 44.26 4.17 3
 -2 -15 1 123.93 145.42 5
 1 15 -1 -165.19 136.34 5
 1 15 -1 35.79 3.71 3
 -1 -15 1 45.01 146.04 5
 0 15 -1 46.51 122.87 5
 0 15 -1 -1.46 1.43 3
 0 -15 1 -142.3 136.35 5
 -1 15 -1 -109.47 127.53 5
 -1 15 -1 12.57 2.55 3
 1 -15 1 -352.77 145.5 5
 -2 15 -1 37.45 134.36 5
 -2 15 -1 23.95 3.06 3
 2 -15 1 -12.79 152.92 5
 -3 15 -1 4.84 127.41 5
 3 -15 1 -25.21 136.29 5
 -4 15 -1 -85.31 123.71 5
 4 -15 1 -50.1 158.13 5
 -5 15 -1 21.77 143.89 5
 -5 15 -1 41.21 4.13 3
 5 -15 1 36.97 2.13 2
 5 -15 1 111.54 180.66 5
 -6 15 -1 71.9 5.5 3
 6 -15 1 73.38 3.56 2
 -7 15 -1 28.71 3.43 3
 7 -15 1 23.81 2.04 2
 -8 15 -1 -0.17 1.89 3
 8 -15 1 0.92 1.03 2
 -9 15 -1 6.22 2.2 3
 9 -15 1 8.34 1.45 2
 -10 15 -1 56.88 4.82 3
 10 -15 1 55.22 3.28 2
 9 14 -1 1 2.02 4
 9 14 -1 -0.4 1.39 3
 8 14 -1 26.16 3.01 3
 8 14 -1 26.56 3.57 4
 7 14 -1 12.33 2.46 4
 7 14 -1 10.38 2.21 3
 6 14 -1 2.34 1.73 3
 6 14 -1 5.11 2.07 4
 5 14 -1 209.6 137.38 5
 -5 -14 1 76.04 145.42 5
 4 14 -1 164.37 122.22 5
 -4 -14 1 50.03 139.82 5
 3 14 -1 -67.35 125.98 5
 -3 -14 1 37.08 137.42 5
 2 14 -1 -89.22 113.13 5
 -2 -14 1 -87.91 115.11 5
 1 14 -1 2.23 1.72 3
 1 14 -1 -181.14 93.09 5
 -1 -14 1 -1.33 108.25 5
 0 14 -1 -83.58 101.87 5
 0 -14 1 29.59 121.56 5
 -1 14 -1 -50.36 106.15 5
 -1 14 -1 -0.45 1.64 3
 1 -14 1 40.64 121.32 5
 -2 14 -1 28.38 107.01 5
 2 -14 1 -139.53 114.36 5
 -3 14 -1 -105.74 94.81 5
 3 -14 1 -99.18 105.63 5
 -4 14 -1 9.89 2.3 3
 -4 14 -1 183.55 113.49 5
 4 -14 1 -49.84 138.62 5
 -5 14 -1 41.14 4.19 3
 5 -14 1 44 2.39 2
 5 -14 1 79.84 158.74 5
 -6 14 -1 -76.35 138.68 5
 -6 14 -1 11.37 2.53 3
 6 -14 1 -79.9 151.41 5
 -7 14 -1 4.05 1.94 3
 -7 14 -1 13.1 141.95 5
 7 -14 1 -72 230.61 5
 -8 14 -1 49.73 4.34 3
 8 -14 1 48.74 2.9 2
 -9 14 -1 65.19 4.97 3
 9 -14 1 62.9 3.5 2
 10 -14 1 9.66 1.48 2
 -11 14 -1 -0.74 1.82 3
 11 -14 1 0.19 1.1 2
 10 13 -1 12.54 1.93 3
 10 13 -1 14.89 2.73 4
 9 13 -1 -0.86 1.33 3
 9 13 -1 4.03 3.03 4
 8 13 -1 2.31 1.94 4
 8 13 -1 2.13 1.62 3
 7 13 -1 1.68 1.68 4
 7 13 -1 105.56 147.69 5
 7 13 -1 0.95 1.35 3
 -7 -13 1 -160.24 137.83 5
 6 13 -1 22.23 2.97 4
 6 13 -1 16.9 128.77 5
 6 13 -1 25.88 2.88 3
 -6 -13 1 237.31 193.51 5
 5 13 -1 58.13 106.93 5
 5 13 -1 4.4 1.89 4
 5 13 -1 2.37 1.55 3
 -5 -13 1 -66.95 112.95 5
 4 13 -1 38.15 102.52 5
 -4 -13 1 213.26 121.51 5
 3 13 -1 -72.64 160.26 5
 3 13 -1 8.53 1.95 4
 3 13 -1 3.65 1.72 3
 -3 -13 1 -7.58 104.24 5
 2 13 -1 -6.09 104.96 5
 2 13 -1 37.21 3.26 3
 2 13 -1 21.9 2.79 4
 -2 -13 1 219.66 123.64 5
 1 13 -1 14.7 2.45 3
 1 13 -1 178.97 104.66 5
 -1 -13 1 -144 90.25 5
 0 13 -1 -38.18 95.33 5
 0 -13 1 -50.98 100.41 5
 -1 13 -1 196.4 173.99 5
 1 -13 1 88.25 108.02 5
 -2 13 -1 -132.44 158.59 5
 2 -13 1 81.86 110.2 5
 -3 13 -1 139.09 110.66 5
 -3 13 -1 12.92 2.39 3
 3 -13 1 -59.54 104.7 5
 3 -13 1 10.96 0.95 2
 -4 13 -1 -0.03 1.48 3
 -4 13 -1 -44.95 98.76 5
 4 -13 1 14.22 124.93 5
 4 -13 1 0.76 0.64 2
 -5 13 -1 -123.02 98.31 5
 5 -13 1 -92.11 136.53 5
 -6 13 -1 8.51 2.22 3
 -6 13 -1 -112.47 116.47 5
 6 -13 1 -15.17 134.03 5
 -7 13 -1 11.74 2.5 3
 -7 13 -1 -119.61 116.28 5
 7 -13 1 -37.78 138.36 5
 -8 13 -1 163.53 134.79 5
 -8 13 -1 76.66 5.09 3
 8 -13 1 66.01 3.57 2
 -9 13 -1 -92.11 143.22 5
 -9 13 -1 -1.12 1.48 3
 9 -13 1 -0.68 0.97 2
 -10 13 -1 25.9 3.43 3
 10 -13 1 26.18 2.23 2
 -11 13 -1 -1.96 1.58 3
 11 -13 1 0.01 1.16 2
 -12 13 -1 0.25 1.64 3
 12 -13 1 4.64 1.4 2
 11 12 -1 0.17 1.94 4
 11 12 -1 0.48 1.28 3
 10 12 -1 13.39 2.14 3
 10 12 -1 16.98 2.84 4
 9 12 -1 14.71 2.72 4
 9 12 -1 20.81 2.48 3
 8 12 -1 -48.04 118.3 5
 8 12 -1 3.43 1.9 4
 8 12 -1 -0.04 1.32 3
 -8 -12 1 105.89 140.67 5
 7 12 -1 218.49 147.13 5
 7 12 -1 68.33 4.59 3
 7 12 -1 71.61 5.13 4
 -7 -12 1 -85.28 127.82 5
 6 12 -1 -21.75 96.2 5
 -6 -12 1 -106.83 120.68 5
 5 12 -1 51.37 94.61 5
 -5 -12 1 -30.02 102.98 5
 4 12 -1 -0.26 1.32 3
 4 12 -1 -126 88.07 5
 4 12 -1 -0.48 1.47 4
 -4 -12 1 -117.35 93.29 5
 3 12 -1 8.92 1.98 3
 3 12 -1 25.23 82.81 5
 3 12 -1 7.62 1.92 4
 -3 -12 1 -46.56 116.33 5
 2 12 -1 78.32 4.98 3
 2 12 -1 89.17 89.1 5
 2 12 -1 83.3 5.28 4
 -2 -12 1 5.48 113.14 5
 1 12 -1 87.15 86.93 5
 1 12 -1 30.99 3.15 3
 -1 -12 1 7.06 92.85 5
 0 12 -1 13.26 2 1
 0 12 -1 14.79 2.36 3
 0 12 -1 -10.51 81.13 5
 0 -12 1 81.34 86.89 5
 -1 12 -1 7.69 1.59 1
 -1 12 -1 30.26 82.37 5
 -1 12 -1 11.5 2.12 3
 1 -12 1 -1.31 85.15 5
 -2 12 -1 61.36 4.07 1
 -2 12 -1 65.02 4.54 3
 -2 12 -1 30.11 77.52 5
 2 -12 1 64.26 2.78 2
 -3 12 -1 0.54 78.69 5
 3 -12 1 -14.25 93.33 5
 -4 12 -1 -68.86 82.89 5
 4 -12 1 84.01 99.65 5
 -5 12 -1 -1.12 97.01 5
 5 -12 1 -70.81 109.57 5
 -6 12 -1 181.38 107.21 5
 -6 12 -1 88.7 5.62 3
 6 -12 1 192.65 118.39 5
 6 -12 1 85.04 4.04 2
 -7 12 -1 -0.88 1.3 3
 -7 12 -1 -71.79 105.75 5
 7 -12 1 -0.96 0.97 1
 7 -12 1 -31.91 114.46 5
 7 -12 1 -0.86 0.88 2
 -8 12 -1 20.62 107.22 5
 -8 12 -1 5.28 2 3
 8 -12 1 2.28 1.03 2
 -9 12 -1 -8 139.33 5
 -9 12 -1 15.71 2.71 3
 -10 12 -1 103.08 6.19 3
 10 -12 1 95.38 4.79 2
 -11 12 -1 3.99 1.73 3
 11 -12 1 2.64 1.16 2
 -12 12 -1 -1.29 1.64 3
 12 -12 1 -0.29 1.19 2
 13 -12 1 -2.94 2.84 4
 13 -12 1 2.74 1.18 2
 12 11 -1 16.48 2.97 4
 12 11 -1 10.43 1.81 3
 11 11 -1 2.97 2.2 4
 11 11 -1 1.07 1.33 3
 10 11 -1 14.75 2.83 4
 10 11 -1 16.86 2.18 3
 -9 -11 1 -191.61 152.73 5
 8 11 -1 101.26 134.9 5
 -8 -11 1 247.59 147.06 5
 7 11 -1 -71.53 106.17 5
 7 11 -1 0.11 1.64 4
 -7 -11 1 49.76 110.34 5
 6 11 -1 21.49 83.26 5
 -6 -11 1 24.95 109.56 5
 5 11 -1 2.5 1.42 3
 5 11 -1 7.51 76.72 5
 5 11 -1 1.09 1.61 4
 -5 -11 1 -90.49 85.86 5
 4 11 -1 122.39 97.9 5
 4 11 -1 156.73 8.79 4
 4 11 -1 161.59 8.27 3
 -4 -11 1 282.1 108.44 5
 3 11 -1 95 5.52 3
 3 11 -1 31.64 78.33 5
 -3 -11 1 129.15 81.28 5
 2 11 -1 14.99 65.41 5
 -2 -11 1 -44.74 75.09 5
 1 11 -1 276.72 12.89 3
 1 11 -1 322.2 85.06 5
 1 11 -1 276.49 13.7 4
 1 11 -1 249.77 13.86 1
 -1 -11 1 245.18 96.77 5
 0 11 -1 47.44 3.56 1
 0 11 -1 55.7 3.75 3
 0 11 -1 23.08 75.8 5
 0 -11 1 51.5 80.27 5
 -1 11 -1 -19.66 75.86 5
 1 -11 1 -57.99 73.89 5
 -2 11 -1 -0.51 1.05 1
 -2 11 -1 47.73 66.53 5
 -2 11 -1 0.53 1.36 3
 2 -11 1 -44.92 82.62 5
 2 -11 1 1.66 0.49 2
 -3 11 -1 327.27 17.28 1
 -3 11 -1 352.18 16.3 3
 -3 11 -1 284.21 91.84 5
 3 -11 1 361.15 14.07 2
 3 -11 1 110.61 83.69 5
 -4 11 -1 136.22 7.51 1
 -4 11 -1 20.44 73.55 5
 4 -11 1 147.36 6.08 2
 4 -11 1 223.66 90.63 5
 -5 11 -1 -92.51 88.75 5
 5 -11 1 -18.74 94.06 5
 -6 11 -1 51.51 93.86 5
 -6 11 -1 15.58 2.64 3
 6 -11 1 -24.06 101.92 5
 6 -11 1 15.73 1.39 2
 6 -11 1 10.45 1.7 1
 -7 11 -1 40.42 87.46 5
 7 -11 1 122.58 110.87 5
 -8 11 -1 154.44 8.14 3
 8 -11 1 142.34 6.62 2
 -9 11 -1 -85.26 166.9 5
 -10 11 -1 92.99 147.72 5
 -10 11 -1 24.18 3.1 3
 10 -11 1 21.52 1.97 2
 -11 11 -1 59.58 171.74 5
 -12 11 -1 9.05 2.29 3
 12 -11 1 13.45 1.67 2
 -13 11 -1 1.39 1.66 3
 13 -11 1 1.73 2.94 4
 13 -11 1 0.22 1.31 2
 -14 11 -1 1.03 1.61 3
 14 -11 1 -2.32 1.07 2
 14 -11 1 -1.68 2.86 4
 13 10 -1 15.39 1.49 2
 13 10 -1 15.03 1.82 3
 13 10 -1 10.81 2.77 4
 12 10 -1 0.92 1.18 3
 12 10 -1 4.19 0.9 2
 12 10 -1 -0.95 2.95 4
 11 10 -1 -1.01 1.85 4
 11 10 -1 0.41 1.26 3
 11 10 -1 2.27 0.77 2
 10 10 -1 0.72 1.26 3
 10 10 -1 3.45 2.01 4
 10 10 -1 -96.25 131.34 5
 -10 -10 1 239.44 151.14 5
 9 10 -1 104.03 132.41 5
 -9 -10 1 21.98 127.8 5
 8 10 -1 1.42 1.37 3
 8 10 -1 -0.19 1.7 4
 -8 -10 1 -88.98 111.13 5
 7 10 -1 -73.75 106.75 5
 -7 -10 1 -18.39 97 5
 6 10 -1 49.59 73.16 5
 -6 -10 1 167.29 99.3 5
 5 10 -1 82.83 4.94 3
 5 10 -1 80.39 74.9 5
 5 10 -1 86.55 5.98 4
 -5 -10 1 204.37 88.2 5
 4 10 -1 6.17 79.45 5
 -4 -10 1 44.82 77.34 5
 3 10 -1 159.91 87.51 5
 3 10 -1 120.19 7.39 1
 3 10 -1 135.86 7.42 4
 3 10 -1 137.18 6.99 3
 -3 -10 1 85.99 70.16 5
 2 10 -1 56.8 62.69 5
 -2 -10 1 43.17 69.84 5
 1 10 -1 8.73 60.25 5
 1 10 -1 -0.92 1.01 1
 1 10 -1 0.23 1.03 4
 1 10 -1 0.19 1.19 3
 -1 -10 1 -16.11 62.3 5
 0 10 -1 8.9 58.47 5
 0 10 -1 7.84 1.69 3
 0 10 -1 4.66 1.33 1
 0 -10 1 -30.24 71.36 5
 -1 10 -1 62.55 4.13 3
 -1 10 -1 102.45 73.86 5
 -1 10 -1 59.33 3.92 1
 1 -10 1 92.66 73.29 5
 1 -10 1 63.02 2.63 2
 -2 10 -1 269.2 91.94 5
 -2 10 -1 156.48 8.18 3
 -2 10 -1 154.8 8.34 1
 2 -10 1 158.46 6.49 2
 2 -10 1 221.14 87.88 5
 -3 10 -1 14.19 1.7 1
 -3 10 -1 36.65 57.38 5
 -3 10 -1 20.16 2.54 3
 -3 10 -1 15.45 1.12 2
 3 -10 1 -46.59 71.24 5
 3 -10 1 15.96 1.18 2
 -4 10 -1 228.34 12.36 1
 -4 10 -1 377.84 102.44 5
 -4 10 -1 249.63 12.03 3
 4 -10 1 257.73 10.15 2
 4 -10 1 284.73 93.83 5
 -5 10 -1 81.9 80.85 5
 -5 10 -1 67.32 4.54 3
 5 -10 1 68.89 3.27 2
 5 -10 1 -0.96 85.62 5
 -6 10 -1 5.46 77.31 5
 6 -10 1 -77.05 89.89 5
 -7 10 -1 -20.44 151.98 5
 -7 10 -1 59.72 4.66 3
 7 -10 1 66.13 3.13 2
 7 -10 1 96.73 99.91 5
 7 -10 1 56.73 3.39 1
 -8 10 -1 9.06 2.08 3
 8 -10 1 11.12 1.32 2
 -9 10 -1 42.68 127.23 5
 -9 10 -1 -45.03 107.18 5
 -10 10 -1 -248.36 151.38 5
 -10 10 -1 -83.39 111.03 5
 -11 10 -1 3.2 1.89 3
 -11 10 -1 -39.62 121.99 5
 11 -10 1 6.44 1.34 2
 -12 10 -1 -53.73 208.22 5
 12 -10 1 16.06 4.01 4
 -13 10 -1 0.77 1.63 3
 13 -10 1 -0.12 2.83 4
 13 -10 1 0.7 1.21 2
 -14 10 -1 -2.4 1.44 3
 14 -10 1 -0.51 1.16 2
 14 -10 1 3.71 3.05 4
 13 9 -1 0.34 2.18 4
 13 9 -1 0.22 1.92 3
 13 9 -1 4.04 1.06 2
 12 9 -1 -3.33 1.78 4
 12 9 -1 1.32 0.96 2
 12 9 -1 0.99 1.12 3
 11 9 -1 12.09 1.29 2
 11 9 -1 10.84 1.71 3
 11 9 -1 47.94 118.78 5
 11 9 -1 9.26 2.54 4
 -11 -9 1 -26.76 155.97 5
 10 9 -1 9.08 1.08 2
 10 9 -1 9.89 1.71 3
 10 9 -1 53.66 98.35 5
 10 9 -1 11.6 2.55 4
 -10 -9 1 -66.32 139.29 5
 9 9 -1 0.79 0.64 2
 9 9 -1 0.38 105 5
 9 9 -1 -0.86 1.74 4
 9 9 -1 0.7 1.31 3
 -9 -9 1 5.79 135.25 5
 8 9 -1 38.13 79.49 5
 -8 -9 1 32.88 104.45 5
 -7 -9 1 -36.66 85.13 5
 6 9 -1 29.67 2.65 3
 6 9 -1 64.14 84.41 5
 6 9 -1 33.54 3.25 4
 -6 -9 1 12.91 87.45 5
 5 9 -1 -36.41 69.41 5
 5 9 -1 4.87 1.63 4
 5 9 -1 9.03 1.65 3
 -5 -9 1 137.86 80.45 5
 4 9 -1 63.03 4.39 4
 4 9 -1 64.94 3.95 3
 4 9 -1 16.39 58.89 5
 -4 -9 1 88.08 68.94 5
 3 9 -1 290.48 15.81 1
 3 9 -1 477.2 107.14 5
 3 9 -1 322.16 15.55 4
 3 9 -1 309.38 14.36 3
 -3 -9 1 480.35 113.85 5
 2 9 -1 156.09 7.67 3
 2 9 -1 145.76 8.2 1
 2 9 -1 49.76 55.99 5
 2 9 -1 149.31 8.1 4
 -2 -9 1 109.28 63.09 5
 1 9 -1 53.89 57.58 5
 -1 -9 1 47.32 66.27 5
 0 9 -1 3.1 1.14 4
 0 9 -1 5.03 1.33 3
 0 9 -1 69.71 65.76 5
 0 9 -1 3.32 1.1 1
 0 -9 1 -43.39 56.92 5
 -1 9 -1 444.03 22.58 1
 -1 9 -1 394.98 90.19 5
 -1 9 -1 461.17 20.73 3
 1 -9 1 298.51 88.55 5
 1 -9 1 465.54 18.2 2
 -2 9 -1 272.87 12.91 3
 -2 9 -1 376.28 99.14 5
 -2 9 -1 262.3 13.67 1
 2 -9 1 274.97 10.99 2
 2 -9 1 314.35 79.42 5
 -3 9 -1 40.21 2.53 1
 -3 9 -1 31.71 1.91 2
 -3 9 -1 37.44 3.04 3
 -3 9 -1 -29.66 58.98 5
 3 -9 1 39.08 1.9 2
 3 -9 1 45.1 69.83 5
 -4 9 -1 -4.23 64.46 5
 -4 9 -1 45.83 3.44 3
 4 -9 1 47.57 2.28 2
 4 -9 1 118.1 74.12 5
 4 -9 1 41.4 3.1 1
 -5 9 -1 303.52 15.22 1
 -5 9 -1 392.38 90.97 5
 -5 9 -1 326.18 14.67 3
 5 -9 1 271.53 15.37 1
 5 -9 1 336.02 12.7 2
 5 -9 1 181.75 91.82 5
 -6 9 -1 13.46 2.22 3
 -6 9 -1 23.4 76.61 5
 6 -9 1 -146.23 79.53 5
 6 -9 1 13.71 1.32 2
 6 -9 1 16.95 1.61 1
 -7 9 -1 5.39 1.65 3
 7 -9 1 5.69 1.04 2
 7 -9 1 -183.73 85.72 5
 -8 9 -1 106.93 99.23 5
 -8 9 -1 14.53 91.27 5
 -9 9 -1 157.48 117.33 5
 -9 9 -1 40.05 4.08 3
 -9 9 -1 -84.4 97.8 5
 9 -9 1 37.54 2.42 2
 -10 9 -1 9.32 128.97 5
 -10 9 -1 -67.1 116.35 5
 -11 9 -1 167 146.47 5
 -11 9 -1 6.98 145.47 5
 -12 9 -1 -116.38 138.99 5
 -12 9 -1 6.43 1.81 3
 12 -9 1 5.4 1.3 2
 12 -9 1 7.01 2.97 4
 -13 9 -1 88.12 5.5 3
 -13 9 -1 25.04 197.44 5
 13 -9 1 84.12 7.41 4
 13 -9 1 90.94 4.55 2
 14 -9 1 39.82 7.61 4
 14 -9 1 30.4 3.01 2
 15 -9 1 -1.66 2.67 4
 15 -9 1 -1.29 1.08 2
 14 8 -1 22.16 1.96 2
 14 8 -1 19.85 3.58 4
 14 8 -1 20.26 2.05 3
 13 8 -1 24.31 1.95 2
 13 8 -1 17.2 1.92 3
 13 8 -1 21.41 3.6 4
 12 8 -1 4.13 1.25 3
 12 8 -1 0.89 0.92 2
 12 8 -1 -0.28 2.1 4
 12 8 -1 90.58 140.69 5
 -12 -8 1 -83.31 185.02 5
 11 8 -1 -15.57 129.06 5
 11 8 -1 7.65 2.27 4
 11 8 -1 6.91 1.44 3
 -11 -8 1 -149.17 139.48 5
 10 8 -1 62.99 3.1 2
 10 8 -1 55.59 3.61 3
 10 8 -1 86.72 100.63 5
 10 8 -1 59.81 4.94 4
 -10 -8 1 85.89 145.21 5
 9 8 -1 -29.7 92.94 5
 -9 -8 1 51.75 118.2 5
 8 8 -1 26.69 3.33 4
 8 8 -1 62.19 89.7 5
 8 8 -1 31.97 1.86 2
 8 8 -1 32.25 2.57 3
 -8 -8 1 87.93 92.94 5
 7 8 -1 142.82 5.86 2
 7 8 -1 131.26 8.02 4
 7 8 -1 143.19 7 3
 7 8 -1 39.63 76.16 5
 -7 -8 1 203.34 103.73 5
 -7 -8 1 132.64 5.76 2
 6 8 -1 232.91 12.48 4
 6 8 -1 253.94 11.25 3
 6 8 -1 229.74 9.69 2
 -6 -8 1 233.72 9.62 2
 -6 -8 1 189.9 84.56 5
 5 8 -1 183.17 9.87 4
 5 8 -1 188.52 8.91 3
 5 8 -1 126.84 76.78 5
 -5 -8 1 179.86 7.42 2
 -5 -8 1 171.59 72.09 5
 4 8 -1 215.53 65.63 5
 4 8 -1 273.09 13.04 4
 4 8 -1 225.49 13.09 1
 4 8 -1 261.79 11.86 3
 -4 -8 1 314.25 80.98 5
 3 8 -1 3.61 1.22 3
 3 8 -1 2.95 1.28 4
 3 8 -1 1.82 1.06 1
 3 8 -1 -8.18 51.78 5
 -3 -8 1 88.67 57.5 5
 2 8 -1 47.4 3.07 3
 2 8 -1 17.67 41.17 5
 2 8 -1 41.84 3.13 1
 2 8 -1 39.9 3.12 4
 -2 -8 1 11.73 43.74 5
 1 8 -1 464.81 20.53 3
 1 8 -1 550.63 101.64 5
 1 8 -1 433.99 22.59 1
 1 8 -1 461.58 22.09 4
 -1 -8 1 450.14 90.21 5
 0 8 -1 -61.79 43.44 5
 0 8 -1 83.68 4.93 4
 0 8 -1 82.25 4.82 1
 0 8 -1 89.87 4.81 3
 0 -8 1 110.44 55.99 5
 -1 8 -1 11.24 1.4 1
 -1 8 -1 9.79 1.6 3
 -1 8 -1 33.97 43.3 5
 1 -8 1 8.14 0.67 2
 1 -8 1 22.52 53.31 5
 -2 8 -1 497.1 20.87 2
 -2 8 -1 519.53 25.48 1
 -2 8 -1 653.39 106.69 5
 -2 8 -1 523.12 23.36 3
 2 -8 1 596.19 103.08 5
 2 -8 1 527.86 20.8 2
 -3 8 -1 565.17 25.01 3
 -3 8 -1 582.4 27.23 1
 -3 8 -1 526.78 22.41 2
 -3 8 -1 523.28 101.24 5
 3 -8 1 633.52 112.77 5
 3 -8 1 581.22 22.36 2
 3 -8 1 522.59 27.26 1
 -4 8 -1 138.16 6.96 1
 -4 8 -1 146.88 65.96 5
 -4 8 -1 139.14 7.12 3
 4 -8 1 123.78 7.07 1
 4 -8 1 96.09 66.8 5
 4 -8 1 141.39 5.78 2
 -5 8 -1 72.72 4.43 3
 -5 8 -1 65.7 63.77 5
 -5 8 -1 71.69 3.79 1
 5 -8 1 74.15 3.31 2
 5 -8 1 65.16 3.95 1
 5 -8 1 -51.54 67.48 5
 -6 8 -1 5.87 1.48 3
 6 -8 1 -22.43 72.39 5
 6 -8 1 5.41 0.89 2
 -7 8 -1 190.52 9.87 3
 -7 8 -1 101.14 73.09 5
 7 -8 1 206.15 8.5 2
 -8 8 -1 230.85 11.16 3
 -8 8 -1 22.95 80.47 5
 -8 8 -1 252.54 106.41 5
 8 -8 1 224.91 9.6 2
 -9 8 -1 -66.01 114.55 5
 -9 8 -1 3.28 98.91 5
 -9 8 -1 -2.12 1.27 3
 9 -8 1 -0.22 0.93 2
 -10 8 -1 -201.32 122.7 5
 -10 8 -1 -43.43 104.56 5
 -11 8 -1 63.65 4.26 3
 -11 8 -1 50.32 139.4 5
 -11 8 -1 -132.61 137.09 5
 11 -8 1 56.98 3.29 2
 11 -8 1 68.99 6.07 4
 -12 8 -1 108.46 132.09 5
 -12 8 -1 7.99 143.28 5
 -13 8 -1 42 160.91 5
 14 -8 1 9.71 3.46 4
 14 -8 1 8.72 1.52 2
 15 -8 1 17.92 4.01 4
 15 -8 1 13.95 1.74 2
 15 7 -1 55.44 5.48 4
 14 7 -1 0.49 0.98 3
 14 7 -1 3.3 1.19 2
 13 7 -1 202.03 228.49 5
 12 7 -1 56.3 162.54 5
 12 7 -1 47.73 3.12 3
 12 7 -1 52.1 4.85 4
 -12 -7 1 152.12 189.53 5
 11 7 -1 34.7 95.03 5
 -11 -7 1 38.95 267.24 5
 10 7 -1 9.64 1.23 2
 10 7 -1 9.67 1.55 3
 10 7 -1 6.77 2.44 4
 10 7 -1 -97.67 82.22 5
 -10 -7 1 8.05 116.84 5
 9 7 -1 -1.03 0.93 3
 9 7 -1 -94.49 75.43 5
 9 7 -1 1.17 1.72 4
 -9 -7 1 -22.62 107.88 5
 8 7 -1 -12.55 70.06 5
 -8 -7 1 -53.79 93.34 5
 7 7 -1 -29.78 58.17 5
 7 7 -1 -0.23 1.49 4
 7 7 -1 -0.01 1.03 2
 7 7 -1 0.82 1.01 3
 -7 -7 1 17.77 85.81 5
 6 7 -1 3.13 0.62 2
 6 7 -1 4.26 1.17 3
 6 7 -1 31.09 78.79 5
 6 7 -1 1.99 1.43 4
 -6 -7 1 6.29 74.41 5
 -6 -7 1 4.59 0.55 2
 5 7 -1 41.74 2.01 2
 5 7 -1 40.67 3.45 4
 5 7 -1 43.89 2.9 3
 -5 -7 1 41.78 1.91 2
 -5 -7 1 7.05 60.77 5
 4 7 -1 191.43 62.84 5
 4 7 -1 197.55 10.05 4
 4 7 -1 192.94 9.07 3
 4 7 -1 172.53 10.04 1
 -4 -7 1 195.34 7.67 2
 -4 -7 1 194.28 71.39 5
 3 7 -1 89.96 5.1 4
 3 7 -1 86.95 4.64 3
 3 7 -1 64.64 48.2 5
 3 7 -1 78.3 4.97 1
 -3 -7 1 129.33 61.94 5
 2 7 -1 232.71 11.99 1
 2 7 -1 187.7 60.37 5
 2 7 -1 223.82 11.75 4
 2 7 -1 240.89 10.91 3
 -2 -7 1 246.88 62.02 5
 1 7 -1 274.95 14.1 4
 1 7 -1 285.11 14.41 1
 1 7 -1 294.59 13.19 3
 1 7 -1 281.45 61.45 5
 -1 -7 1 261.19 62.73 5
 0 7 -1 117.84 6.06 3
 0 7 -1 173.77 59.55 5
 0 7 -1 116.32 6.35 4
 0 7 -1 117.24 6.34 1
 0 -7 1 133.39 55.35 5
 -1 7 -1 677.77 102.16 5
 -1 7 -1 522.76 25.52 1
 -1 7 -1 518.44 23.23 3
 1 -7 1 515.13 20.75 2
 1 -7 1 419.81 87.49 5
 -2 7 -1 119.55 6.02 1
 -2 7 -1 147.27 51.41 5
 -2 7 -1 120.99 6.01 3
 -2 7 -1 106.9 4.82 2
 2 -7 1 115.86 4.76 2
 2 -7 1 49.51 48.53 5
 2 -7 1 109 5.98 1
 -3 7 -1 0.28 0.41 2
 -3 7 -1 -0.16 0.93 3
 -3 7 -1 31.42 44.46 5
 -3 7 -1 0.07 0.53 1
 3 -7 1 -0.37 0.64 1
 3 -7 1 0.07 0.44 2
 3 -7 1 -41.58 45.13 5
 -4 7 -1 57.3 53.33 5
 -4 7 -1 1.55 0.58 1
 -4 7 -1 2.16 1.09 3
 4 -7 1 -28 59.93 5
 4 -7 1 1.19 0.74 1
 4 -7 1 1.78 0.56 2
 -5 7 -1 574.93 25.06 3
 -5 7 -1 568.45 27.05 1
 5 -7 1 587.65 22.55 2
 5 -7 1 370.75 95.59 5
 5 -7 1 508.77 27.21 1
 -6 7 -1 6.73 51.87 5
 -6 7 -1 5.12 1.4 3
 6 -7 1 3.44 0.78 2
 6 -7 1 -31.04 63.04 5
 -7 7 -1 96.81 91.26 5
 -7 7 -1 139.01 77 5
 -8 7 -1 245.84 97.45 5
 -8 7 -1 154 91.89 5
 -8 7 -1 238.82 11.54 3
 8 -7 1 237.22 10.05 2
 -9 7 -1 10.18 91.06 5
 -9 7 -1 -75.98 86.35 5
 -10 7 -1 4.27 1.59 3
 -10 7 -1 -80.09 94.15 5
 -10 7 -1 90.3 121.57 5
 10 -7 1 1.19 1.01 2
 -11 7 -1 54.92 121.04 5
 -11 7 -1 136.68 124.1 5
 -12 7 -1 -175.73 138.31 5
 -12 7 -1 135.58 184.07 5
 -13 7 -1 208.23 156.89 5
 -13 7 -1 -38.07 166.66 5
 13 -7 1 14.57 3.62 4
 -14 7 -1 57.94 207.68 5
 15 -7 1 22.99 6.08 4
 15 -7 1 14.42 1.81 2
 16 -7 1 -1.23 2.6 4
 16 -7 1 -0.6 1.04 2
 15 6 -1 3.42 2.54 4
 15 6 -1 5.61 1.32 2
 15 6 -1 2.41 1.42 3
 14 6 -1 5.35 2.54 4
 14 6 -1 9.86 1.51 2
 14 6 -1 7.76 1.32 3
 13 6 -1 -37.09 168.14 5
 13 6 -1 3.7 2.53 4
 13 6 -1 1.99 1.1 2
 13 6 -1 2.31 0.93 3
 -13 -6 1 186.93 196.51 5
 12 6 -1 257.9 151.88 5
 -12 -6 1 166.71 157.18 5
 11 6 -1 -87.01 110.52 5
 -11 -6 1 -169.87 131.54 5
 10 6 -1 -12.49 93.22 5
 -10 -6 1 1.1 123.69 5
 9 6 -1 4.81 0.96 2
 9 6 -1 -69.83 83.5 5
 9 6 -1 4.8 1.89 4
 9 6 -1 3.15 1.05 3
 -9 -6 1 -39.26 103.67 5
 8 6 -1 -0.17 55.59 5
 8 6 -1 0.11 0.86 3
 8 6 -1 -1.1 1.43 4
 8 6 -1 1.03 0.63 2
 -8 -6 1 -15.32 87.17 5
 7 6 -1 63.75 4.68 4
 7 6 -1 59.81 2.94 2
 7 6 -1 63.87 3.52 3
 7 6 -1 155.4 74.25 5
 -7 -6 1 34.82 80.11 5
 6 6 -1 217.85 9.82 3
 6 6 -1 212.06 8.71 2
 6 6 -1 57.33 55.16 5
 6 6 -1 201.97 11.18 4
 -6 -6 1 254.08 102.96 5
 -6 -6 1 210.11 8.63 2
 5 6 -1 48.69 2.3 2
 5 6 -1 48.84 3.68 4
 5 6 -1 50.83 3.01 3
 -5 -6 1 48.54 2.21 2
 -5 -6 1 100.18 76.34 5
 4 6 -1 1193.04 46.13 2
 4 6 -1 1153.36 54.9 4
 4 6 -1 1194.11 50.26 3
 4 6 -1 1030.03 56.36 1
 -4 -6 1 1247.64 131.86 5
 -4 -6 1 1200.51 46.05 2
 3 6 -1 0.26 0.84 1
 3 6 -1 0.37 0.94 4
 3 6 -1 1.95 0.9 3
 3 6 -1 37.59 42.01 5
 -3 -6 1 -25.39 33.8 5
 -3 -6 1 0.56 0.23 2
 2 6 -1 -12.97 31.27 5
 -2 -6 1 -20.35 32.3 5
 1 6 -1 517.54 74.56 5
 1 6 -1 588.47 27.41 4
 1 6 -1 574.6 25.34 3
 1 6 -1 553.2 28.11 1
 -1 -6 1 667.94 94.52 5
 0 6 -1 115.67 6.34 4
 0 6 -1 92.82 44.38 5
 0 6 -1 124.63 6.05 3
 0 -6 1 117.95 6.23 1
 0 -6 1 98.53 47.24 5
 0 -6 1 122.03 4.84 2
 -1 6 -1 157.41 46.25 5
 -1 6 -1 123.8 6.28 3
 -1 6 -1 126.76 6.54 1
 -1 6 -1 121.02 5.2 2
 1 -6 1 41.87 45.08 5
 1 -6 1 129.34 5.13 2
 1 -6 1 124.83 6.46 1
 -2 6 -1 264.04 54.96 5
 -2 6 -1 270.57 11.3 2
 -2 6 -1 286.74 13.77 1
 -2 6 -1 282.75 12.84 3
 2 -6 1 192.81 52.04 5
 2 -6 1 275 11.24 2
 -3 6 -1 190.66 8.18 2
 -3 6 -1 163.18 55.62 5
 -3 6 -1 210.49 9.51 3
 -3 6 -1 199.39 9.83 1
 3 -6 1 237.49 64.43 5
 3 -6 1 194.61 9.92 1
 3 -6 1 194.82 8.12 2
 -4 6 -1 243.78 11.38 3
 -4 6 -1 252.19 11.88 1
 4 -6 1 259.62 60.69 5
 4 -6 1 247.43 9.95 2
 4 -6 1 220.56 11.99 1
 -5 6 -1 85.39 4.7 3
 -5 6 -1 80.03 4.19 1
 5 -6 1 81.64 4.39 1
 5 -6 1 87.81 3.77 2
 5 -6 1 141.17 61.39 5
 -6 6 -1 55.27 58.24 5
 -7 6 -1 55.14 65.77 5
 -7 6 -1 8.32 58.03 5
 -8 6 -1 -76.61 79.14 5
 -8 6 -1 -45.85 75.17 5
 -9 6 -1 149.38 7.91 3
 -9 6 -1 -23.91 93.89 5
 -9 6 -1 297.81 108.77 5
 9 -6 1 158.98 6.88 2
 -10 6 -1 -40.38 95.77 5
 -10 6 -1 100.28 114.28 5
 -10 6 -1 41.96 3.19 3
 10 -6 1 34.01 2.37 2
 -11 6 -1 65.61 112.59 5
 -11 6 -1 58.23 112.03 5
 -12 6 -1 46.74 137.73 5
 -12 6 -1 69.84 121 5
 12 -6 1 86.88 4.25 2
 12 -6 1 74.34 6.58 4
 -13 6 -1 -80.38 155.6 5
 -13 6 -1 -30.22 147.86 5
 -14 6 -1 -112.93 214.74 5
 -14 6 -1 68.41 178.63 5
 14 -6 1 1.62 2.48 4
 14 -6 1 0.08 1.04 2
 -15 6 -1 -144.26 288.48 5
 15 -6 1 8.31 3.15 4
 15 -6 1 1.87 1.31 2
 16 -6 1 8.87 3.29 4
 16 -6 1 9.45 1.59 2
 15 5 -1 2.95 1.05 3
 15 5 -1 6.55 1.32 2
 15 5 -1 8.21 3.08 4
 14 5 -1 122.27 175.65 5
 -14 -5 1 -13.35 234.93 5
 13 5 -1 30.55 2.28 3
 13 5 -1 -120.2 133.45 5
 13 5 -1 31.78 2.46 2
 13 5 -1 31.48 4.3 4
 -13 -5 1 265.87 191.2 5
 12 5 -1 36.32 2.4 2
 12 5 -1 7.96 106.05 5
 12 5 -1 31.33 2.39 3
 12 5 -1 38.28 4.49 4
 -12 -5 1 258.02 179.74 5
 11 5 -1 4.75 101.25 5
 -11 -5 1 -27.42 123.2 5
 10 5 -1 173.21 10.21 4
 10 5 -1 150.47 79.16 5
 10 5 -1 175.18 7.53 2
 10 5 -1 169.45 8.15 3
 -10 -5 1 414.12 145.69 5
 9 5 -1 2.19 1.83 4
 9 5 -1 -108.42 94.93 5
 9 5 -1 4.73 1.07 3
 9 5 -1 2.95 0.84 2
 -9 -5 1 -1.23 97.35 5
 8 5 -1 25.14 59.48 5
 8 5 -1 81.94 3.71 2
 8 5 -1 64.23 5.35 4
 8 5 -1 83.07 4.17 3
 -8 -5 1 117.56 98.49 5
 7 5 -1 17.54 2.43 4
 7 5 -1 14.71 48.5 5
 -7 -5 1 -52.64 79.85 5
 6 5 -1 49.15 49.23 5
 6 5 -1 144.86 8.11 4
 6 5 -1 147.91 7.05 3
 6 5 -1 141.43 6.04 2
 -6 -5 1 138.62 5.97 2
 -6 -5 1 267.13 89.49 5
 5 5 -1 31.34 38.46 5
 5 5 -1 108.07 5.34 3
 5 5 -1 109.89 6.34 4
 5 5 -1 107.58 4.63 2
 -5 -5 1 175.14 66.27 5
 4 5 -1 64.92 3.26 3
 4 5 -1 53.7 2.57 2
 4 5 -1 56.3 3.63 1
 4 5 -1 66.45 3.99 4
 -4 -5 1 56.67 3.15 3
 -4 -5 1 54.85 41.76 5
 -4 -5 1 55.21 2.5 2
 3 5 -1 95.21 5.38 4
 3 5 -1 94.12 3.94 2
 3 5 -1 68.37 39.97 5
 3 5 -1 94.39 4.75 3
 3 5 -1 88.48 5.26 1
 -3 -5 1 70.19 44.44 5
 -3 -5 1 94.94 3.87 2
 -3 -5 1 96.67 4.66 3
 2 5 -1 224.07 54.35 5
 2 5 -1 322.04 14.1 3
 2 5 -1 316.4 15.71 1
 2 5 -1 324.88 15.68 4
 -2 -5 1 294.04 13.98 3
 -2 -5 1 356.34 75.53 5
 1 5 -1 720.72 31.46 3
 1 5 -1 719.22 34.15 4
 1 5 -1 711.21 35.11 1
 1 5 -1 873.17 105.54 5
 -1 -5 1 775.5 82.69 5
 -1 -5 1 685.27 31.36 3
 -1 -5 1 745.02 35.01 1
 0 5 -1 30.98 2.2 3
 0 5 -1 33.7 2.32 4
 0 5 -1 35 2.15 1
 0 5 -1 23.3 22.76 5
 0 -5 1 32.46 2.28 4
 0 -5 1 33.47 1.42 2
 0 -5 1 30.56 2.09 3
 0 -5 1 54.71 33.06 5
 0 -5 1 36.06 2.06 1
 -1 5 -1 24.94 1.29 2
 -1 5 -1 25.27 1.72 1
 -1 5 -1 30.22 2.03 3
 -1 5 -1 55.59 30.24 5
 1 -5 1 27.7 1.98 4
 1 -5 1 26.95 1.23 2
 1 -5 1 24.67 30.86 5
 1 -5 1 27.15 1.85 3
 1 -5 1 26.96 1.68 1
 -2 5 -1 259.21 11.72 3
 -2 5 -1 250 10.35 2
 -2 5 -1 255.44 12.54 1
 -2 5 -1 387.96 70.17 5
 2 -5 1 249.88 10.29 2
 2 -5 1 254.22 12.55 1
 2 -5 1 230.45 56.08 5
 -3 5 -1 5.96 0.68 1
 -3 5 -1 8.1 38.12 5
 -3 5 -1 6.25 0.66 2
 3 -5 1 5.71 0.62 2
 3 -5 1 8.05 0.88 1
 3 -5 1 9.7 36.59 5
 -4 5 -1 13.08 1.57 3
 -4 5 -1 11.92 0.97 2
 -4 5 -1 12.46 0.86 1
 4 -5 1 15.46 47.82 5
 4 -5 1 11.03 1.06 1
 4 -5 1 10.42 1.03 2
 -5 5 -1 21.73 1.96 3
 -5 5 -1 2.36 43.16 5
 5 -5 1 20.42 1.34 2
 5 -5 1 72.64 53.46 5
 -6 5 -1 11.06 52.95 5
 -6 5 -1 -39.81 46.82 5
 -7 5 -1 451.42 102.81 5
 -7 5 -1 325.57 84.06 5
 -7 5 -1 527.25 23.44 3
 7 -5 1 529.08 21.24 2
 -8 5 -1 76.43 72.45 5
 -8 5 -1 5.75 62.42 5
 -9 5 -1 107.75 93 5
 -9 5 -1 44.15 78.11 5
 -10 5 -1 105.43 5.93 3
 -10 5 -1 150.31 98.61 5
 -10 5 -1 121.56 88.83 5
 10 -5 1 111.13 7.47 4
 -11 5 -1 -63.71 107.95 5
 -11 5 -1 86.17 122.41 5
 11 -5 1 12.78 2.88 4
 11 -5 1 11.52 1.45 2
 -12 5 -1 260.49 154.06 5
 -12 5 -1 -72.7 112.75 5
 -13 5 -1 36.4 140.84 5
 -13 5 -1 91.38 142.93 5
 -14 5 -1 72.22 175.22 5
 -14 5 -1 -77.88 169.39 5
 14 -5 1 9.11 2.88 4
 -15 5 -1 145.74 204.87 5
 16 -5 1 -0.58 2.46 4
 16 -5 1 -0.1 1.06 2
 16 4 -1 23.9 4.1 4
 15 4 -1 0.34 1.05 2
 15 4 -1 0.18 0.89 3
 15 4 -1 -1.79 2.24 4
 14 4 -1 136.31 153.87 5
 -14 -4 1 -228.42 191.26 5
 13 4 -1 314.88 168.02 5
 -13 -4 1 245.75 177.48 5
 12 4 -1 -0.5 126.46 5
 -12 -4 1 6.1 138.93 5
 11 4 -1 7.9 2.53 4
 11 4 -1 -15.92 91.64 5
 -11 -4 1 162.97 127.15 5
 10 4 -1 50.09 4.54 4
 10 4 -1 59.6 73.98 5
 10 4 -1 46.24 2.82 3
 10 4 -1 44.81 2.61 2
 -10 -4 1 169.53 108.51 5
 9 4 -1 57.37 3.18 3
 9 4 -1 55.83 4.73 4
 9 4 -1 55.09 2.92 2
 9 4 -1 35.34 83.79 5
 8 4 -1 66.7 58.6 5
 8 4 -1 140.32 6.17 2
 8 4 -1 145.74 8.42 4
 -8 -4 1 112.84 95.34 5
 7 4 -1 180.15 10.42 4
 7 4 -1 195.8 8.79 3
 7 4 -1 261.91 88.88 5
 7 4 -1 191.62 8.03 2
 -7 -4 1 215.46 77.65 5
 6 4 -1 6.81 1.78 4
 6 4 -1 -21.41 39.14 5
 -6 -4 1 14.89 51.65 5
 5 4 -1 -11.69 34.13 5
 -5 -4 1 -0.21 43.07 5
 4 4 -1 2424.13 97.59 2
 4 4 -1 2454 115.12 4
 4 4 -1 2495.33 105.42 3
 4 4 -1 2374.71 195.92 5
 -4 -4 1 2511.88 196.78 5
 -4 -4 1 2443.8 97.54 2
 3 4 -1 76.42 3.83 3
 3 4 -1 77.98 3.24 2
 3 4 -1 72.52 4.32 1
 3 4 -1 74.45 4.5 4
 -3 -4 1 72.37 3.77 3
 -3 -4 1 135.16 52.98 5
 -3 -4 1 77.9 3.18 2
 2 4 -1 832.13 32.23 2
 2 4 -1 777.67 38.3 4
 2 4 -1 817.6 35.12 3
 2 4 -1 767.65 39.38 1
 2 4 -1 678.93 87.98 5
 -2 -4 1 840.97 39.31 1
 -2 -4 1 822.21 35.24 3
 -2 -4 1 806.03 32.16 2
 -2 -4 1 818.01 38.5 4
 -2 -4 1 778.86 81.91 5
 1 4 -1 722.12 34.26 4
 1 4 -1 727.7 73.22 5
 1 4 -1 709.16 31.5 3
 1 4 -1 724.34 35.25 1
 -1 -4 1 731.45 34.39 4
 -1 -4 1 708.16 31.62 3
 -1 -4 1 627.98 69.98 5
 -1 -4 1 759.6 35.17 1
 0 4 -1 43.37 2.56 1
 0 4 -1 44.58 2.68 4
 0 4 -1 28.85 21.32 5
 0 4 -1 44.88 2.56 3
 0 -4 1 30.62 24.37 5
 0 -4 1 45.98 2.73 4
 0 -4 1 46.48 2.51 1
 0 -4 1 43.37 1.87 2
 0 -4 1 44.37 2.5 3
 -1 4 -1 451.86 22 1
 -1 4 -1 449.4 18.1 2
 -1 4 -1 455.8 19.95 3
 -1 4 -1 424.56 63.93 5
 1 -4 1 436.6 19.88 3
 1 -4 1 470.98 21.57 4
 1 -4 1 415.09 62.16 5
 1 -4 1 442.41 18.05 2
 1 -4 1 454.35 21.96 1
 -2 4 -1 238.54 11.79 1
 -2 4 -1 236.86 9.78 2
 -2 4 -1 205.08 46.36 5
 2 -4 1 241.16 9.75 2
 2 -4 1 248.21 11.81 1
 2 -4 1 171.75 46.38 5
 -3 4 -1 3.45 0.85 3
 -3 4 -1 1.13 0.35 1
 -3 4 -1 3.01 0.5 2
 3 -4 1 -17.77 27.8 5
 3 -4 1 2.89 0.46 2
 3 -4 1 2.04 0.7 3
 -4 4 -1 182.71 8.76 3
 -4 4 -1 188.96 9.02 1
 -4 4 -1 153.58 89.65 5
 -4 4 -1 182.46 7.72 2
 4 -4 1 181.12 7.69 2
 4 -4 1 192.91 8.94 3
 4 -4 1 237.12 66.26 5
 -5 4 -1 548.61 88.72 5
 -5 4 -1 632.46 114.68 5
 5 -4 1 604.93 24.32 2
 -6 4 -1 1.45 44.05 5
 -6 4 -1 -37.41 46.03 5
 -6 4 -1 1.08 0.9 3
 6 -4 1 2.58 0.67 2
 -7 4 -1 0.88 0.88 3
 -7 4 -1 -61.62 55.88 5
 -7 4 -1 -22.82 46.53 5
 7 -4 1 -0.24 0.62 2
 -8 4 -1 522.17 123.58 5
 -8 4 -1 749.13 32.59 3
 8 -4 1 747.1 36.09 4
 8 -4 1 726.84 29.79 2
 -9 4 -1 27.52 2.46 3
 -9 4 -1 49.72 97.54 5
 -9 4 -1 25.42 1.69 1
 -9 4 -1 15.69 78.5 5
 9 -4 1 25.43 3.56 4
 9 -4 1 28.18 1.92 2
 -10 4 -1 -45.59 72.03 5
 -10 4 -1 59.87 75.87 5
 10 -4 1 7.21 1.21 2
 10 -4 1 9.61 2.71 4
 -11 4 -1 0.33 0.59 1
 -11 4 -1 0.08 0.43 1
 -11 4 -1 153.81 121.82 5
 -11 4 -1 -60.93 90.45 5
 11 -4 1 0.04 0.86 2
 -12 4 -1 88.58 4.98 1
 -12 4 -1 71.48 142.77 5
 -12 4 -1 126.3 141.53 5
 -12 4 -1 89.87 4.81 1
 12 -4 1 115.67 7.44 4
 12 -4 1 105.02 4.72 2
 -13 4 -1 -16.42 117.84 5
 -13 4 -1 58.59 138.99 5
 13 -4 1 44 5.16 4
 13 -4 1 43.04 2.82 2
 -14 4 -1 331.88 310.05 5
 -14 4 -1 -140 155.13 5
 -15 4 -1 -180.41 231.75 5
 -15 4 -1 -100.72 183.13 5
 15 -4 1 1.52 1.24 2
 15 -4 1 -0.95 2.43 4
 16 -4 1 12.24 1.73 2
 16 -4 1 15 3.74 4
 17 -4 1 12.26 3.36 4
 16 3 -1 3.35 2.58 4
 15 3 -1 22.4 2.11 2
 15 3 -1 25.95 3.74 4
 15 3 -1 18.16 1.71 3
 14 3 -1 0.68 1.03 2
 14 3 -1 -0.64 0.86 3
 14 3 -1 -2.46 2.16 4
 -14 -3 1 -163.94 213.5 5
 13 3 -1 -1.11 0.94 2
 13 3 -1 -1.52 0.83 3
 13 3 -1 1.12 2.01 4
 13 3 -1 165.9 108.75 5
 -13 -3 1 -40.23 143.8 5
 12 3 -1 -1.04 0.91 2
 12 3 -1 -1.78 1.97 4
 12 3 -1 -0.49 0.86 3
 12 3 -1 16.06 86.92 5
 -12 -3 1 -225.57 142.03 5
 11 3 -1 -28.19 78 5
 -11 -3 1 0.45 115.7 5
 10 3 -1 181.43 8.33 3
 10 3 -1 38.69 101.42 5
 10 3 -1 175.75 10.49 4
 10 3 -1 178.76 7.79 2
 -10 -3 1 144.21 112.3 5
 9 3 -1 42.73 57.85 5
 9 3 -1 10.43 2.46 4
 9 3 -1 14.68 1.45 2
 -9 -3 1 32.74 102.11 5
 8 3 -1 61.99 3.14 2
 8 3 -1 66.09 54.9 5
 8 3 -1 61.84 4.86 4
 8 3 -1 65.14 3.38 3
 -8 -3 1 39.89 83.98 5
 7 3 -1 132.88 5.75 2
 7 3 -1 134.47 7.84 4
 7 3 -1 98.36 64.9 5
 7 3 -1 131.32 6.23 3
 -7 -3 1 33.15 58.58 5
 6 3 -1 135.32 6.32 3
 6 3 -1 142.36 7.81 4
 6 3 -1 131.8 5.79 2
 6 3 -1 114.27 59.4 5
 -6 -3 1 166.75 74.67 5
 5 3 -1 328.3 14.36 3
 5 3 -1 335.65 13.24 2
 5 3 -1 222.6 63.72 5
 5 3 -1 325.68 16.36 4
 -5 -3 1 279.8 69.13 5
 -5 -3 1 314.2 13.16 2
 4 3 -1 791.36 33.67 3
 4 3 -1 773.86 31.11 2
 4 3 -1 686.91 102.11 5
 4 3 -1 788.15 37.2 4
 -4 -3 1 807.43 101.07 5
 -4 -3 1 762.02 31.06 2
 3 3 -1 98 5.13 4
 3 3 -1 90.2 4.22 3
 3 3 -1 85.01 3.72 2
 -3 -3 1 85.47 3.68 2
 -3 -3 1 90.6 4.74 1
 -3 -3 1 85.26 5.04 4
 -3 -3 1 150.77 54.78 5
 -3 -3 1 84.26 4.19 3
 2 3 -1 3552.61 236.08 5
 -2 -3 1 3247.28 154.47 4
 -2 -3 1 3245.32 214.52 5
 1 3 -1 9.82 1.11 4
 1 3 -1 23.86 18.59 5
 -1 -3 1 6.15 0.45 2
 -1 -3 1 -0.6 13.86 5
 -1 -3 1 9.69 0.95 3
 -1 -3 1 9.95 1.21 4
 0 3 -1 45.72 2.32 3
 0 3 -1 54.9 20.16 5
 0 3 -1 45.85 2.35 1
 0 3 -1 38.52 2.41 4
 0 -3 1 34.85 2.37 4
 0 -3 1 41.97 1.74 2
 0 -3 1 61.59 22.8 5
 0 -3 1 39.6 2.22 3
 -1 3 -1 91.59 4.69 1
 -1 3 -1 145.19 31.13 5
 -1 3 -1 89.04 4.46 3
 -1 3 -1 93.68 3.85 2
 1 -3 1 90.4 4.46 3
 1 -3 1 99 4.79 4
 1 -3 1 85.63 25.56 5
 1 -3 1 91.83 4.66 1
 1 -3 1 90.99 3.82 2
 -2 3 -1 6.47 0.96 3
 -2 3 -1 8.03 23.33 5
 2 -3 1 6.39 0.91 3
 2 -3 1 8.05 0.56 2
 2 -3 1 19.7 21.23 5
 -3 3 -1 1526.59 64.21 3
 -3 3 -1 1466.93 59.28 2
 -3 3 -1 1536.63 71.53 1
 3 -3 1 1511.2 127.96 5
 3 -3 1 1513.93 64.2 3
 3 -3 1 1385.14 71.6 1
 -4 3 -1 410.56 16.46 2
 -4 3 -1 522.96 95.41 5
 -4 3 -1 409.02 18.06 3
 4 -3 1 407.39 16.42 2
 4 -3 1 393.18 17.99 3
 -5 3 -1 7.15 1.22 3
 -5 3 -1 -0.26 48.68 5
 -5 3 -1 30.23 47.5 5
 5 -3 1 9.98 1.24 3
 5 -3 1 6.15 0.76 2
 -6 3 -1 265.51 14.21 1
 -6 3 -1 124.23 53.15 5
 -6 3 -1 301.73 14.09 1
 -6 3 -1 332.22 91.49 5
 -6 3 -1 300.78 13.32 3
 6 -3 1 302.3 11.99 2
 -7 3 -1 1.16 0.6 1
 -7 3 -1 7.83 62.86 5
 -7 3 -1 0.77 0.93 3
 -7 3 -1 1.38 0.37 1
 -7 3 -1 -0.58 66.82 5
 7 -3 1 0.63 0.68 2
 7 -3 1 2.52 1.63 4
 -8 3 -1 410.67 122.6 5
 -8 3 -1 440.74 21.19 1
 -8 3 -1 428.58 19.66 3
 -8 3 -1 426.48 115.49 5
 8 -3 1 432 22.07 4
 8 -3 1 444.65 17.91 2
 -9 3 -1 152.08 104.17 5
 -9 3 -1 32.62 64.5 5
 -9 3 -1 72.26 3.78 1
 9 -3 1 77.03 5.61 4
 9 -3 1 73 3.61 2
 -10 3 -1 -103.1 90.47 5
 -10 3 -1 -5.41 87.36 5
 10 -3 1 4.9 1.02 2
 10 -3 1 4.28 2.22 4
 -11 3 -1 -129.69 97.79 5
 -11 3 -1 -88.26 103.98 5
 11 -3 1 11.75 3.05 4
 -12 3 -1 117.8 6.31 1
 -12 3 -1 475.21 176.03 5
 -12 3 -1 114 124.63 5
 12 -3 1 128.58 5.8 2
 12 -3 1 133.8 8.5 4
 -13 3 -1 35.67 139.12 5
 -13 3 -1 184.73 167.68 5
 -14 3 -1 -349.64 170.96 5
 -14 3 -1 146.02 159.74 5
 -15 3 -1 18.53 179.84 5
 -15 3 -1 0.84 1 1
 -15 3 -1 -55.81 191.43 5
 15 -3 1 1.25 1.16 2
 15 -3 1 0.46 2.34 4
 -16 3 -1 -160.19 193.63 5
 16 -3 1 12.57 5.27 4
 16 -3 1 9.67 1.53 2
 17 -3 1 0.56 1.09 2
 17 -3 1 0.48 2.35 4
 16 2 -1 -1.25 1.33 3
 16 2 -1 1.74 2.42 4
 16 2 -1 0.49 1.91 2
 15 2 -1 -0.11 0.91 3
 15 2 -1 -0.3 0.97 2
 15 2 -1 -0.53 2.49 4
 -15 -2 1 19.5 188.68 5
 -15 -2 1 -661.02 238.18 5
 14 2 -1 9.69 3.03 4
 -14 -2 1 -407.8 315.38 5
 -13 -2 1 244.35 179 5
 12 2 -1 60.91 138.6 5
 12 2 -1 20.37 1.9 2
 12 2 -1 15.45 3.4 4
 12 2 -1 19.86 1.86 3
 -12 -2 1 -143.04 141.28 5
 11 2 -1 -49.41 97.84 5
 -11 -2 1 -157.89 96.24 5
 10 2 -1 68.56 5.29 4
 10 2 -1 124.86 72.42 5
 10 2 -1 66.88 3.46 2
 -10 -2 1 97.65 102.87 5
 9 2 -1 273.88 11.26 2
 9 2 -1 267.21 14.43 4
 9 2 -1 39.06 59.81 5
 -9 -2 1 311.54 117.82 5
 8 2 -1 57.03 57.7 5
 8 2 -1 16.42 1.39 2
 8 2 -1 19.23 2.91 4
 -8 -2 1 4.33 77.06 5
 7 2 -1 158.05 6.92 2
 7 2 -1 234.27 89.91 5
 7 2 -1 166.77 9.18 4
 -7 -2 1 128.13 78.62 5
 6 2 -1 522.12 25.3 4
 6 2 -1 281.76 67.53 5
 6 2 -1 527.16 20.78 2
 -6 -2 1 408.76 85.47 5
 5 2 -1 249.07 10.91 3
 5 2 -1 246.66 10.1 2
 5 2 -1 281.43 77.45 5
 -5 -2 1 242.61 10.04 2
 -5 -2 1 140.12 52.11 5
 4 2 -1 8.65 1.53 4
 4 2 -1 8.82 0.87 3
 4 2 -1 6.98 0.71 2
 4 2 -1 19.27 29.78 5
 -4 -2 1 8.59 0.7 2
 -4 -2 1 7.91 1.02 1
 -4 -2 1 29 32.68 5
 -4 -2 1 5.12 1.22 4
 3 2 -1 111.98 6.06 4
 3 2 -1 112.24 5.08 3
 3 2 -1 113.59 4.66 2
 3 2 -1 114.99 35.66 5
 -3 -2 1 102.17 6.02 4
 -3 -2 1 80.75 28.47 5
 -3 -2 1 115.43 4.62 2
 -2 -2 1 8194.73 467.65 5
 1 2 -1 1269.4 62.8 1
 1 2 -1 1316.05 51.73 2
 1 2 -1 1310.88 60.88 4
 1 2 -1 1178.61 90.39 5
 1 2 -1 1293.22 55.88 3
 -1 -2 1 1357.22 62.78 1
 -1 -2 1 1230.79 91.47 5
 -1 -2 1 1283.65 55.86 3
 0 2 -1 423.04 37.14 5
 0 2 -1 406.01 17.11 3
 0 2 -1 374.67 18.54 4
 0 2 -1 373.09 19.07 1
 0 -2 1 411.21 19.06 1
 0 -2 1 400.43 18.59 4
 0 -2 1 391.56 17.08 3
 0 -2 1 349.23 36.11 5
 -1 2 -1 160.11 6.37 2
 -1 2 -1 135.08 27.34 5
 -1 2 -1 150.16 7.67 1
 -1 2 -1 152.37 7.07 3
 1 -2 1 161.61 6.35 2
 1 -2 1 146.52 7.04 3
 1 -2 1 164.05 7.66 1
 1 -2 1 120.64 26.34 5
 1 -2 1 163.59 7.61 4
 -2 2 -1 55.7 2.75 1
 -2 2 -1 49.13 2.82 3
 -2 2 -1 59.06 2.43 2
 2 -2 1 52.09 2.81 3
 2 -2 1 57.38 2.79 1
 2 -2 1 58.79 2.42 2
 2 -2 1 21.09 22.07 5
 -3 2 -1 -14.56 19.13 5
 -4 2 -1 158.89 6.85 2
 -4 2 -1 79.25 49.7 5
 -4 2 -1 164.12 8.01 1
 -4 2 -1 183.23 57.2 5
 -4 2 -1 169.92 7.69 3
 4 -2 1 161.28 7.79 3
 4 -2 1 168.61 6.86 2
 -5 2 -1 7.33 36.32 5
 -5 2 -1 22.19 1.72 3
 -5 2 -1 20.98 1.19 1
 -5 2 -1 16.52 49.7 5
 5 -2 1 19.99 1.55 3
 5 -2 1 20.38 1.3 2
 -6 2 -1 532.57 23.84 3
 -6 2 -1 551.9 26.12 1
 -6 2 -1 592.77 117.84 5
 -6 2 -1 452.08 101.03 5
 6 -2 1 544.24 23.82 3
 6 -2 1 529.73 21.82 2
 -7 2 -1 392.63 83.56 5
 -7 2 -1 476.3 22.99 1
 -7 2 -1 304.8 81.41 5
 7 -2 1 483.3 23.59 4
 7 -2 1 472.75 19.27 2
 -8 2 -1 -64.23 58.77 5
 -8 2 -1 -42.37 53.38 5
 8 -2 1 11.76 2.44 4
 -9 2 -1 69.41 82.47 5
 -9 2 -1 5.26 0.73 1
 -9 2 -1 -22.49 59.87 5
 9 -2 1 3.06 0.87 2
 9 -2 1 3.13 1.95 4
 -10 2 -1 270.69 94.14 5
 -10 2 -1 364.91 18.01 1
 -10 2 -1 391.18 115.6 5
 10 -2 1 365.31 19.24 4
 10 -2 1 374 15.28 2
 -11 2 -1 -11.29 100.81 5
 -11 2 -1 130.27 86.2 5
 11 -2 1 52.5 4.88 4
 11 -2 1 48.16 2.83 2
 -12 2 -1 -28.83 130.9 5
 -12 2 -1 156.88 135.05 5
 12 -2 1 -0.94 0.9 2
 12 -2 1 -0.81 1.85 4
 -13 2 -1 222.66 122.94 5
 -13 2 -1 209.02 158.45 5
 13 -2 1 171.98 10.5 4
 13 -2 1 164.73 7.53 2
 -14 2 -1 -18.47 123.12 5
 -14 2 -1 23.28 175.06 5
 -15 2 -1 -38.61 217.65 5
 -15 2 -1 131.36 143.85 5
 -16 2 -1 385.93 285.54 5
 -16 2 -1 -119.15 209.93 5
 16 -2 1 2.84 1.22 2
 16 -2 1 4.23 2.47 4
 17 -2 1 -0.13 1.12 2
 17 -2 1 -3.61 2.29 4
 16 1 -1 21.42 3.97 4
 16 1 -1 19.53 2.32 2
 16 1 -1 19.5 1.74 3
 -15 -1 1 329.58 215.73 5
 -15 -1 1 140.46 196.97 5
 14 1 -1 -1.38 0.99 2
 14 1 -1 -1.56 1.96 4
 -14 -1 1 32.32 209.73 5
 -14 -1 1 -177.48 147.5 5
 13 1 -1 102.96 7.13 4
 13 1 -1 91.05 4.7 2
 -13 -1 1 -7.63 121.73 5
 -13 -1 1 271.24 148.8 5
 12 1 -1 6.69 2.38 4
 12 1 -1 5.56 1.18 2
 -12 -1 1 23.09 137.59 5
 11 1 -1 78.35 85.7 5
 -11 -1 1 112.23 137.87 5
 10 1 -1 101.54 69.51 5
 -10 -1 1 77.52 115.85 5
 9 1 -1 116.75 75.29 5
 9 1 -1 250.4 13.08 4
 9 1 -1 238.46 9.99 2
 9 1 -1 223.02 10.71 3
 -9 -1 1 449.75 128.99 5
 8 1 -1 188.95 7.87 2
 8 1 -1 158.31 88.44 5
 8 1 -1 172.53 8.44 3
 8 1 -1 194.28 10.44 4
 -8 -1 1 -14.49 71.36 5
 7 1 -1 43.28 2.21 2
 7 1 -1 37.21 2.42 3
 7 1 -1 40.64 3.63 4
 7 1 -1 46.76 56.38 5
 6 1 -1 70.42 3.31 2
 6 1 -1 73.74 4.86 4
 6 1 -1 26.03 57.98 5
 -6 -1 1 134.92 66.95 5
 5 1 -1 1418.61 65.69 4
 5 1 -1 1386.69 55.36 2
 5 1 -1 1328.01 139.38 5
 -5 -1 1 1374.16 55.32 2
 -5 -1 1 1385.44 67.1 1
 -5 -1 1 1301.45 139.93 5
 4 1 -1 508.19 23.68 4
 4 1 -1 810.84 122.14 5
 4 1 -1 496.69 19.62 2
 -4 -1 1 478.05 23.98 1
 -4 -1 1 334.38 65.12 5
 -4 -1 1 467.55 23.56 4
 -4 -1 1 489.41 19.67 2
 3 1 -1 633.95 28.52 4
 3 1 -1 613.85 23.86 2
 3 1 -1 435.48 68.8 5
 -3 -1 1 560.93 88.7 5
 -3 -1 1 603.15 23.83 2
 -3 -1 1 585.82 28.43 4
 -3 -1 1 559.34 28.96 1
 2 1 -1 8.38 0.58 3
 2 1 -1 7.43 0.98 4
 2 1 -1 7.19 0.52 2
 -2 -1 1 14.97 20.22 5
 -2 -1 1 4.14 0.62 1
 -2 -1 1 6.3 1 4
 -2 -1 1 6.03 0.47 2
 1 1 -1 699.63 33.74 4
 1 1 -1 714.58 30.85 3
 1 1 -1 708.7 28.62 2
 -1 -1 1 824.99 58.32 5
 -1 -1 1 712.11 30.85 3
 -1 -1 1 697.09 28.61 2
 -1 -1 1 743.31 33.78 4
 0 1 -1 4488.3 238.77 5
 0 -1 1 4349.59 238.52 5
 -1 1 -1 564.37 24.5 3
 -1 1 -1 482.24 43.17 5
 -1 1 -1 604.66 22.64 2
 1 -1 1 575.43 24.5 3
 1 -1 1 515.28 27.31 1
 1 -1 1 602.19 22.63 2
 1 -1 1 543.57 44.28 5
 -2 1 -1 1690.91 118.4 5
 -3 1 -1 449.17 21.36 1
 -3 1 -1 437.77 19.36 3
 -3 1 -1 439.86 17.8 2
 -3 1 -1 365.53 61.89 5
 3 -1 1 367.17 68.14 5
 3 -1 1 454.68 17.8 2
 3 -1 1 438.94 19.36 3
 -4 1 -1 284.25 11.96 2
 -4 1 -1 291.13 13.12 3
 -4 1 -1 300.05 14.29 1
 4 -1 1 303.93 13.12 3
 4 -1 1 287.89 14.54 4
 4 -1 1 486.42 93.5 5
 4 -1 1 292.14 11.96 2
 -5 1 -1 181.15 8.89 1
 -5 1 -1 178.4 7.53 2
 -5 1 -1 194.89 59.07 5
 5 -1 1 189.78 9.58 4
 5 -1 1 175.07 7.63 2
 5 -1 1 93.74 48.98 5
 -6 1 -1 74.66 3.92 1
 -6 1 -1 183.18 78.61 5
 6 -1 1 72.97 3.9 3
 6 -1 1 80.58 5.1 4
 6 -1 1 72.97 51.93 5
 -7 1 -1 345.01 16.97 1
 -7 1 -1 234.6 84.19 5
 7 -1 1 351.22 14.24 2
 7 -1 1 341.92 15.57 3
 7 -1 1 230.19 76.41 5
 7 -1 1 355.36 17.71 4
 -8 1 -1 547.41 26.68 1
 -8 1 -1 653.85 133.86 5
 8 -1 1 572.76 27.33 4
 8 -1 1 532.15 22.27 2
 8 -1 1 372.47 102.34 5
 -9 1 -1 -25 63.02 5
 -9 1 -1 94.31 4.83 1
 9 -1 1 89.52 4.28 2
 9 -1 1 90.14 6.27 4
 -10 1 -1 132.91 102.34 5
 10 -1 1 45.47 4.65 4
 10 -1 1 40.22 2.46 2
 -11 1 -1 189.34 135.72 5
 -11 1 -1 121.12 92.74 5
 11 -1 1 100.81 5.36 2
 11 -1 1 104.56 7.17 4
 -12 1 -1 67.91 90.26 5
 -12 1 -1 210.16 143.26 5
 12 -1 1 111.41 7.82 4
 12 -1 1 116.47 5.4 2
 -13 1 -1 -124.41 148.85 5
 -13 1 -1 -85.05 115.37 5
 13 -1 1 -0.29 0.91 2
 13 -1 1 0.19 2.25 4
 -14 1 -1 54.98 166.25 5
 -14 1 -1 -252.86 187.64 5
 14 -1 1 -0.43 0.91 2
 14 -1 1 2.65 2.44 4
 -15 1 -1 81.77 138.21 5
 -15 1 -1 366.46 241.7 5
 -16 1 -1 -199.02 271.58 5
 -16 1 -1 273.95 254.05 5
 16 -1 1 34.73 2.91 2
 16 -1 1 41.02 5.2 4
 17 -1 1 -0.74 2.58 4
 17 -1 1 0.41 1.11 2
 -16 0 1 327.48 232.15 5
 -15 0 1 -432.61 180.66 5
 -15 0 1 -267.81 201.54 5
 -14 0 1 85.81 161.05 5
 -14 0 1 -1.8 181.87 5
 13 0 -1 8.48 2.72 4
 13 0 -1 7.61 1.39 2
 -13 0 1 182.25 266.79 5
 -13 0 1 -73.59 109.08 5
 12 0 -1 1.31 2.23 4
 12 0 -1 1.52 1.11 2
 -12 0 1 145.69 121.9 5
 -12 0 1 -10 130.79 5
 11 0 -1 59.85 3.54 2
 11 0 -1 59.2 5.36 4
 -11 0 1 152.85 123.99 5
 10 0 -1 36.19 4.24 4
 10 0 -1 29.3 2.09 2
 -10 0 1 78.29 126.99 5
 9 0 -1 107.11 82.91 5
 9 0 -1 256.86 13.3 4
 9 0 -1 234.26 11.29 3
 9 0 -1 233.23 10.12 2
 -9 0 1 203.85 105.02 5
 8 0 -1 22.47 50.24 5
 8 0 -1 -0.23 1.29 4
 8 0 -1 -0.57 0.51 3
 8 0 -1 0.15 0.7 2
 -8 0 1 -14.52 68.12 5
 7 0 -1 1152.3 48.34 3
 7 0 -1 1140.08 44.81 2
 7 0 -1 642.83 112.16 5
 7 0 -1 1134.4 53.58 4
 -7 0 1 950.91 152.61 5
 6 0 -1 70.56 48.9 5
 6 0 -1 111.36 5.02 2
 6 0 -1 120.82 6.89 4
 6 0 -1 118.22 5.47 3
 -6 0 1 11.27 53.79 5
 -6 0 1 113.43 6.03 1
 5 0 -1 21.46 1.37 3
 5 0 -1 21.54 2.45 4
 5 0 -1 7.78 41.15 5
 5 0 -1 18.35 1.25 2
 -5 0 1 18.85 1.16 2
 -5 0 1 46.84 48.57 5
 4 0 -1 410.04 19 4
 4 0 -1 385.29 16.84 3
 4 0 -1 495.83 85.8 5
 4 0 -1 377.37 15.6 2
 -4 0 1 336.61 74.42 5
 -4 0 1 380.11 15.58 2
 -4 0 1 377.28 18.82 4
 3 0 -1 1718.08 72.17 3
 3 0 -1 1722.96 78.98 4
 3 0 -1 1521.52 130.51 5
 -3 0 1 1633.26 133.16 5
 -3 0 1 1658.79 78.89 4
 2 0 -1 1893.73 88.1 4
 2 0 -1 1740.91 129.86 5
 -2 0 1 1735.02 130.16 5
 -2 0 1 1976.8 88.09 4
 1 0 -1 70.24 2.86 2
 -1 0 1 75.48 17.9 5
 -1 0 1 68.16 2.85 2
 -2 0 -1 251.75 11.92 1
 -2 0 -1 259.78 43.31 5
 -2 0 -1 248.26 9.91 2
 2 0 1 241.52 11.83 4
 2 0 1 241.52 9.9 2
 2 0 1 243.93 11.92 1
 -3 0 -1 31.16 59.49 5
 -3 0 -1 36.44 2.6 4
 -3 0 -1 35.89 1.89 1
 -3 0 -1 35.16 1.64 2
 3 0 1 32.75 1.91 1
 3 0 1 35.47 1.65 2
 3 0 1 33.59 1.92 3
 3 0 1 38.92 2.59 4
 3 0 1 25.55 24.31 5
 -4 0 -1 15.22 1.02 1
 -4 0 -1 32.28 25.7 5
 4 0 1 13.26 1.67 4
 4 0 1 13.47 1.16 3
 -5 0 -1 544.22 96.28 5
 -5 0 -1 841.87 40.97 4
 -5 0 -1 880.36 41.67 1
 -5 0 -1 866.88 34.53 2
 5 0 1 860.49 34.51 2
 5 0 1 884.76 41.19 4
 5 0 1 870.48 37.4 3
 5 0 1 799.24 116.38 5
 -6 0 -1 174.09 75.39 5
 -6 0 -1 121.55 6.09 1
 6 0 1 116.33 5.77 3
 6 0 1 161.62 57.89 5
 6 0 1 118.42 5.16 2
 -7 0 -1 5.33 0.74 1
 -7 0 -1 -42.23 52.22 5
 7 0 1 7.13 1.8 4
 7 0 1 30.48 53.38 5
 7 0 1 4.29 0.77 2
 7 0 1 5.95 1.01 3
 -8 0 -1 73.27 3.95 1
 -8 0 -1 112.68 87.98 5
 8 0 1 165.46 84.03 5
 8 0 1 64.34 5.07 4
 8 0 1 74.45 3.47 2
 -9 0 -1 42.5 87.86 5
 9 0 1 38.52 3.8 4
 9 0 1 -19.75 63.51 5
 9 0 1 36.41 2.17 2
 -10 0 -1 564.67 152.46 5
 10 0 1 269.45 14.45 4
 10 0 1 262.29 11.16 2
 10 0 1 137.69 74.34 5
 -11 0 -1 -29.05 85.53 5
 11 0 1 9.57 1.45 2
 11 0 1 13.51 2.94 4
 11 0 1 47.48 85.75 5
 -12 0 -1 -50.38 135.64 5
 -13 0 -1 -72.19 130.62 5
 -13 0 -1 -132.57 133.74 5
 -14 0 -1 236.08 170.19 5
 -14 0 -1 217.74 200.44 5
 -15 0 -1 -3.94 202.62 5
 -15 0 -1 64.2 199.45 5
 15 0 1 32.28 2.48 2
 -16 0 -1 -108.71 431.3 5
 -16 0 -1 -210.14 274.4 5
 16 0 1 8.15 2.86 4
 17 0 1 0.5 1.15 2
 17 0 1 1.19 2.53 4
 17 -1 -1 -0.54 2.44 4
 16 -1 -1 5.23 1.36 2
 16 -1 -1 4.31 3 4
 -16 1 1 -109.23 288.21 5
 -16 1 1 -127.23 198.54 5
 15 -1 -1 1.39 1.22 2
 15 -1 -1 1.67 2.46 4
 -15 1 1 313 193.95 5
 -15 1 1 -10.39 217.29 5
 -14 1 1 3.45 145.72 5
 -14 1 1 76.56 191.1 5
 13 -1 -1 72.59 3.98 2
 13 -1 -1 81.61 6.45 4
 -13 1 1 108.97 106.06 5
 -13 1 1 319.87 181.61 5
 -12 1 1 30.18 118.6 5
 -12 1 1 165.53 104.82 5
 -11 1 1 -16.56 98.14 5
 -11 1 1 49.33 127.66 5
 -10 1 1 51.82 86.3 5
 -10 1 1 -70.89 83.04 5
 9 -1 -1 11.62 1.26 2
 9 -1 -1 9.78 2.25 4
 -9 1 1 23.94 71.89 5
 -9 1 1 37.79 76.96 5
 8 -1 -1 180.38 9.99 4
 8 -1 -1 170.1 8.05 3
 8 -1 -1 170.54 7.46 2
 -8 1 1 239.63 81.64 5
 7 -1 -1 239.41 10.96 3
 7 -1 -1 259.35 13.1 4
 7 -1 -1 242.77 10.14 2
 -7 1 1 232.79 12.09 1
 -7 1 1 287.14 93.21 5
 -6 1 1 -12.02 48.18 5
 5 -1 -1 3.82 0.72 3
 5 -1 -1 3.43 0.71 2
 5 -1 -1 3.48 1.39 4
 -5 1 1 -14.01 37.41 5
 4 -1 -1 205.54 9.12 3
 4 -1 -1 195.44 8.41 2
 -4 1 1 199.39 8.39 2
 -4 1 1 215.9 9.17 3
 -4 1 1 266.63 72.35 5
 3 -1 -1 91.19 3.94 2
 3 -1 -1 88.08 4.26 3
 3 -1 -1 107.5 5.36 4
 -3 1 1 89.14 4.28 3
 -3 1 1 54.2 26.72 5
 -3 1 1 93.42 3.92 2
 -3 1 1 168.5 42.71 5
 2 -1 -1 1170.95 49.86 3
 2 -1 -1 1198.27 54.52 4
 -2 1 1 1090.95 91.93 5
 -2 1 1 1133.06 49.86 3
 1 -1 -1 1447.53 101.15 5
 1 -1 -1 1477.25 74.42 1
 -1 1 1 1964.46 119.29 5
 -1 -1 -1 1072.15 75.82 5
 -1 -1 -1 1136.59 51.7 4
 1 1 1 1054.03 75.72 5
 -2 -1 -1 474.8 22.68 4
 -2 -1 -1 498.58 52.44 5
 -2 -1 -1 465.66 19.16 2
 -2 -1 -1 476.27 23.21 1
 2 1 1 490.04 22.71 4
 2 1 1 473.84 19.16 2
 2 1 1 481.95 23.23 1
 2 1 1 674.12 85.13 5
 -3 -1 -1 1688.76 137.46 5
 -3 -1 -1 1813.83 84.36 4
 3 1 1 1662.86 136.52 5
 3 1 1 1856.67 84.39 4
 -4 -1 -1 1581.44 140.83 5
 -4 -1 -1 1605.17 76.34 1
 4 1 1 1476.82 76.37 1
 4 1 1 1732.25 142.29 5
 4 1 1 1642.95 74.45 4
 -5 -1 -1 1369.6 132.32 5
 -5 -1 -1 1082.27 44.1 2
 -5 -1 -1 1037.58 52.21 4
 -5 -1 -1 1155.15 53.51 1
 5 1 1 1114.07 52.39 4
 5 1 1 1085.39 44.09 2
 5 1 1 1431.61 169.47 5
 -6 -1 -1 751.97 122.27 5
 -6 -1 -1 938.22 43.5 1
 6 1 1 902.33 35.96 2
 6 1 1 976.83 151.4 5
 6 1 1 848.82 43.4 4
 -7 -1 -1 231.18 11.23 1
 -7 -1 -1 273.04 93.04 5
 7 1 1 227.53 11.84 4
 7 1 1 217.07 9.2 2
 7 1 1 177.05 80.1 5
 7 1 1 207.4 10.09 3
 -8 -1 -1 124.9 70.27 5
 8 1 1 150.71 8.42 4
 8 1 1 68.44 60.47 5
 8 1 1 139.47 6.2 2
 -9 -1 -1 55.83 73.44 5
 9 1 1 120.61 5.33 2
 9 1 1 115.49 7.42 4
 9 1 1 235.01 88.89 5
 -10 -1 -1 -37.37 108.19 5
 10 1 1 10.82 70.73 5
 -11 -1 -1 70.02 100.26 5
 11 1 1 148.18 6.71 2
 11 1 1 187.94 126.25 5
 11 1 1 154.81 9.44 4
 -12 -1 -1 -79.82 118.8 5
 12 1 1 -28.37 93.42 5
 -13 -1 -1 130.07 148.27 5
 -14 -1 -1 -56.16 157.81 5
 -15 -1 -1 30.47 170.65 5
 -15 -1 -1 -404.85 186 5
 15 1 1 3.74 1.25 2
 15 1 1 -0.4 2.39 4
 -16 -1 -1 28.06 268.75 5
 -16 -1 -1 -78.48 260.37 5
 16 1 1 7.49 1.82 2
 16 1 1 7.81 3 4
 17 1 1 3.83 1.14 2
 17 1 1 1.16 1.62 3
 17 1 1 2.27 2.65 4
 17 -2 -1 12.88 3.46 4
 -16 2 1 -54.88 250.8 5
 -16 2 1 178.56 228.96 5
 -15 2 1 301.67 242.84 5
 -15 2 1 123.16 163.66 5
 14 -2 -1 3.75 1.25 2
 14 -2 -1 2.5 2.24 4
 -14 2 1 59.41 187.91 5
 -14 2 1 -43.15 153 5
 13 -2 -1 230.31 13.02 4
 13 -2 -1 214.28 9.66 2
 -13 2 1 383.77 178.68 5
 -13 2 1 46.91 129.69 5
 12 -2 -1 17.77 3.33 4
 -12 2 1 -123.36 120.1 5
 -12 2 1 -154.76 108.7 5
 11 -2 -1 75.26 3.83 2
 11 -2 -1 64.57 8.32 4
 -11 2 1 6.61 94.86 5
 -11 2 1 156.72 84.22 5
 10 -2 -1 123.12 7.72 4
 10 -2 -1 108.96 5.24 2
 -10 2 1 79.87 91.12 5
 -10 2 1 27.68 71.44 5
 -9 2 1 73.98 77.77 5
 -9 2 1 -97.9 73.03 5
 8 -2 -1 66.52 5.23 4
 -8 2 1 107.11 65.84 5
 -8 2 1 148.39 76.25 5
 -8 2 1 73.32 3.92 1
 -7 2 1 6.14 63.41 5
 -7 2 1 -37.03 72.3 5
 6 -2 -1 110.96 5.47 3
 6 -2 -1 115.91 6.88 4
 6 -2 -1 117.44 5.02 2
 -6 2 1 98.62 54.4 5
 -6 2 1 111.77 5.55 3
 -6 2 1 89.57 65.09 5
 5 -2 -1 1445.64 57.9 2
 5 -2 -1 1450.27 62.46 3
 5 -2 -1 1495.47 68.61 4
 -5 2 1 1294.07 142.34 5
 -5 2 1 1430.81 62.5 3
 -5 2 1 1433.32 146.5 5
 4 -2 -1 2.79 1.28 4
 4 -2 -1 1.72 0.47 2
 4 -2 -1 2.19 0.58 3
 -4 2 1 0.46 0.33 2
 -4 2 1 -7.59 29.26 5
 -4 2 1 -17.11 34.37 5
 -4 2 1 0.71 0.55 3
 3 -2 -1 43.95 28.19 5
 3 -2 -1 35.21 2.02 3
 -3 2 1 40.34 1.78 2
 -3 2 1 35.66 2.06 3
 -3 2 1 33.81 2.22 1
 -3 2 1 44.87 27.88 5
 2 -2 -1 1181.36 49.89 3
 2 -2 -1 1178.68 56.02 1
 2 -2 -1 1054.95 95.18 5
 -2 2 1 1094.3 55.97 1
 -2 2 1 1156 94.6 5
 -2 2 1 1194.78 46.2 2
 -2 2 1 1171.91 49.91 3
 1 -2 -1 4847.19 283.75 5
 0 -2 -1 651.8 59.8 5
 0 -2 -1 783.52 35.84 1
 0 -2 -1 732.47 34.65 4
 0 -2 -1 732.4 31.93 3
 0 -2 -1 706.59 29.48 2
 0 2 1 707.18 29.47 2
 0 2 1 739.95 60.82 5
 0 2 1 727.33 34.65 4
 0 2 1 713.74 31.93 3
 0 2 1 808.71 35.82 1
 -1 -2 -1 26.64 15.62 5
 -1 -2 -1 52.69 2.85 4
 -1 -2 -1 51.76 2.59 3
 -1 -2 -1 54.43 2.84 1
 1 2 1 75.07 22.36 5
 1 2 1 50.23 2.81 4
 1 2 1 53.06 2.21 2
 1 2 1 51.72 2.82 1
 1 2 1 51.32 2.59 3
 -2 -2 -1 248.43 12.32 1
 -2 -2 -1 250.67 12.18 4
 -2 -2 -1 281.73 48 5
 -2 -2 -1 246.65 10.08 2
 2 2 1 243.08 10.07 2
 2 2 1 249.97 12.34 1
 2 2 1 248.89 11.05 3
 2 2 1 326.67 54.98 5
 2 2 1 268.96 12.18 4
 -3 -2 -1 1476.14 72.29 4
 -3 -2 -1 1702.78 130.51 5
 3 2 1 1303.33 121.82 5
 3 2 1 1632.61 72.36 4
 -4 -2 -1 3028.14 146.73 4
 -4 -2 -1 3195.47 229.09 5
 4 2 1 3270.73 146.82 4
 4 2 1 3024.55 226.35 5
 -5 -2 -1 676.98 31.81 1
 -5 -2 -1 707.99 100.56 5
 -5 -2 -1 619.58 31.36 4
 -5 -2 -1 658.54 26.23 2
 5 2 1 429.84 87.87 5
 5 2 1 617.68 31.88 1
 5 2 1 667.82 26.22 2
 5 2 1 688.76 31.51 4
 -6 -2 -1 614.75 106.22 5
 6 2 1 789.2 138.38 5
 6 2 1 775.52 37.11 4
 6 2 1 774.29 30.91 2
 -7 -2 -1 516.74 107.31 5
 7 2 1 533.15 21.37 2
 7 2 1 531.02 26.06 4
 7 2 1 353.6 86.5 5
 -8 -2 -1 50.94 71.94 5
 8 2 1 11.12 53.37 5
 -9 -2 -1 -51.78 69.95 5
 9 2 1 1.9 1.52 4
 9 2 1 2.73 0.84 2
 9 2 1 12.16 60.67 5
 -10 -2 -1 40.45 124.78 5
 10 2 1 109 5.14 2
 10 2 1 150.93 107.87 5
 10 2 1 118.05 7.45 4
 -11 -2 -1 -78.76 113.29 5
 11 2 1 114.41 98.67 5
 11 2 1 69.28 5.91 4
 11 2 1 79.47 3.82 2
 -12 -2 -1 190.42 149.27 5
 12 2 1 57.99 5.24 4
 12 2 1 69.54 102.61 5
 12 2 1 50.78 2.97 2
 -13 -2 -1 82.75 147.03 5
 13 2 1 2.54 1.09 2
 13 2 1 -97.82 119.12 5
 13 2 1 -0.98 2.15 4
 -14 -2 -1 -282.92 192.59 5
 14 2 1 -200 172.77 5
 14 2 1 0.66 2.38 4
 14 2 1 2.32 1.15 2
 -15 -2 -1 53.91 236.2 5
 15 2 1 30.48 2.45 3
 15 2 1 29.41 2.41 2
 15 2 1 33.78 4.66 4
 -16 -2 -1 22.07 199.34 5
 16 2 1 51.58 6.57 4
 16 2 1 47.22 3.09 3
 16 2 1 48.81 3.07 2
 17 2 1 9.24 3.08 4
 -16 3 1 -313.86 261.24 5
 -16 3 1 216.23 270.45 5
 15 -3 -1 29.03 4.52 4
 15 -3 -1 27.39 2.41 2
 -15 3 1 158.25 233.16 5
 -15 3 1 20.95 2.28 1
 -15 3 1 19.02 159 5
 14 -3 -1 0.68 1.08 2
 14 -3 -1 0.17 2.37 4
 -14 3 1 -88.21 180.95 5
 -14 3 1 -312.22 175.85 5
 -14 3 1 1.83 1.25 1
 -13 3 1 -144.22 142.45 5
 -13 3 1 139.72 138.22 5
 12 -3 -1 112.61 7.72 4
 12 -3 -1 101.45 5.08 2
 -12 3 1 32.09 148.12 5
 -12 3 1 78.51 135.68 5
 11 -3 -1 295.2 12.57 2
 11 -3 -1 299.62 17.86 4
 -11 3 1 514.71 222.18 5
 -11 3 1 251.66 91.29 5
 10 -3 -1 165.52 7.22 2
 -10 3 1 201.79 112.01 5
 -10 3 1 72.31 79.12 5
 -10 3 1 159.97 8.25 1
 9 -3 -1 8.97 1.24 2
 9 -3 -1 9.35 2.4 4
 -9 3 1 39.5 97.34 5
 -9 3 1 10.72 1 1
 -9 3 1 11.11 71.52 5
 8 -3 -1 689.24 28.08 2
 8 -3 -1 724.39 34.16 4
 -8 3 1 545.99 109.02 5
 -8 3 1 672.19 30.45 3
 -8 3 1 957.54 170.26 5
 7 -3 -1 321.17 13.4 2
 7 -3 -1 334.13 16.79 4
 -7 3 1 216.43 81.11 5
 -7 3 1 320.62 78.66 5
 -7 3 1 322.32 14.68 3
 6 -3 -1 82.89 3.75 2
 6 -3 -1 81.46 4.17 3
 6 -3 -1 89.24 5.48 4
 -6 3 1 91.26 69.89 5
 -6 3 1 77.37 4.51 1
 -6 3 1 86.65 60.03 5
 -6 3 1 80.16 4.25 3
 -5 3 1 -24.29 37.37 5
 -5 3 1 -12.51 47.1 5
 4 -3 -1 611.44 23.96 2
 4 -3 -1 629.85 100.25 5
 -4 3 1 596.65 23.93 2
 -4 3 1 558.45 28.95 1
 -4 3 1 612.26 26.05 3
 -4 3 1 599.06 88.57 5
 3 -3 -1 -29.96 27.62 5
 -3 3 1 4.77 24.31 5
 2 -3 -1 356.68 16.09 3
 2 -3 -1 482.89 67.33 5
 2 -3 -1 346.96 17.9 1
 2 -3 -1 371.08 14.73 2
 -2 3 1 284.75 50.32 5
 -2 3 1 373.03 17.85 1
 -2 3 1 377.18 16.13 3
 -2 3 1 370.79 14.71 2
 1 -3 -1 157.85 33.86 5
 1 -3 -1 223.13 11.54 1
 1 -3 -1 223.39 10.4 3
 1 -3 -1 239.59 9.43 2
 -1 3 1 235.48 10.46 3
 -1 3 1 237.78 9.41 2
 -1 3 1 244.97 11.5 1
 -1 3 1 282.92 47.2 5
 0 -3 -1 63.77 2.74 2
 0 -3 -1 61.51 3.47 4
 0 -3 -1 90.79 28.29 5
 0 -3 -1 70.27 3.57 1
 0 -3 -1 67.65 3.28 3
 0 3 1 68.7 3.32 3
 0 3 1 64.96 3.48 4
 0 3 1 69.01 26.15 5
 0 3 1 66.73 2.72 2
 0 3 1 69.45 3.52 1
 -1 -3 -1 1053 93.47 5
 -1 -3 -1 1251.45 59.98 1
 -1 -3 -1 1231.39 53.47 3
 -1 -3 -1 1220.16 58.15 4
 1 3 1 1283.23 58.11 4
 1 3 1 1319.05 100.26 5
 1 3 1 1263.29 59.97 1
 1 3 1 1234.91 53.48 3
 -2 -3 -1 96.8 31.96 5
 -2 -3 -1 100.8 4.92 1
 -2 -3 -1 84.63 4.44 3
 -2 -3 -1 94.8 3.87 2
 -2 -3 -1 93.46 5.01 4
 2 3 1 91.97 3.84 2
 2 3 1 92.33 4.47 3
 2 3 1 132.46 40.8 5
 2 3 1 105.04 5.01 4
 -3 -3 -1 531.11 21.56 2
 -3 -3 -1 671.74 96.97 5
 -3 -3 -1 516.01 26.07 4
 3 3 1 507.1 82.31 5
 3 3 1 534.19 25.78 4
 3 3 1 551.53 23.5 3
 3 3 1 541.91 21.55 2
 3 3 1 554.23 26.36 1
 -4 -3 -1 1320.28 53.37 2
 -4 -3 -1 1253.7 127.45 5
 -4 -3 -1 1308.79 63.19 4
 -4 -3 -1 1377.14 64.8 1
 4 3 1 1357.86 53.36 2
 4 3 1 1310.86 64.87 1
 4 3 1 1418.4 57.79 3
 4 3 1 1137.09 122.28 5
 4 3 1 1326.83 63.15 4
 -5 -3 -1 422.42 17.42 2
 -5 -3 -1 467.47 86.27 5
 5 3 1 466.33 21.28 4
 5 3 1 441.9 17.41 2
 5 3 1 405.86 21.32 1
 5 3 1 276.29 72.66 5
 -6 -3 -1 6.28 49.12 5
 -6 -3 -1 24.63 1.45 2
 6 3 1 21.95 2.59 4
 6 3 1 19.49 1.84 1
 -7 -3 -1 97.12 77.53 5
 7 3 1 88.04 3.96 2
 7 3 1 88.52 5.69 4
 7 3 1 16.08 45.69 5
 -8 -3 -1 -76.57 73.63 5
 8 3 1 8.46 1.05 2
 8 3 1 8.27 2.07 4
 8 3 1 22.16 69.02 5
 -9 -3 -1 -7.33 81.01 5
 9 3 1 26.04 85.48 5
 9 3 1 7.39 1.05 2
 9 3 1 6.42 1.96 4
 -10 -3 -1 254.2 128.2 5
 10 3 1 156.39 8.98 4
 10 3 1 84.47 85.69 5
 10 3 1 138.9 6.39 2
 -11 -3 -1 49.13 112.88 5
 11 3 1 78.08 98.37 5
 -12 -3 -1 -6.79 138.29 5
 12 3 1 -26.6 123.06 5
 12 3 1 0.46 0.96 2
 12 3 1 -2.5 2.07 4
 -13 -3 -1 139.17 158.24 5
 13 3 1 50.9 3.35 3
 13 3 1 59.89 5.44 4
 13 3 1 57.01 3.18 2
 13 3 1 -8.49 146.55 5
 -14 -3 -1 129.69 219.6 5
 14 3 1 160.16 150.71 5
 -15 -3 -1 -168.24 184.68 5
 15 3 1 13.56 3.31 4
 16 3 1 1.62 1.14 2
 16 3 1 4.31 4.76 4
 16 3 1 1.38 1.01 3
 16 -4 -1 -0.05 2.58 4
 16 -4 -1 0.84 1.2 2
 15 -4 -1 4.28 1.4 2
 15 -4 -1 1.95 2.41 4
 -15 4 1 -102.75 185.74 5
 -15 4 1 4.66 1.25 1
 -15 4 1 -350.41 250.67 5
 -14 4 1 50.62 163.81 5
 -14 4 1 -189.27 164.13 5
 13 -4 -1 67.71 3.67 2
 13 -4 -1 71.92 6.14 4
 -13 4 1 300.14 181.86 5
 -13 4 1 -254.82 203.59 5
 -13 4 1 62.31 3.98 1
 -12 4 1 -27.57 120.1 5
 -12 4 1 -116.8 121.25 5
 -11 4 1 58.73 103.69 5
 -11 4 1 -127.15 102.6 5
 10 -4 -1 72.12 4.11 2
 10 -4 -1 76.38 5.99 4
 -10 4 1 71.24 4.45 1
 -10 4 1 223.59 139.91 5
 -10 4 1 114.36 89.25 5
 -10 4 1 82.47 4.06 1
 9 -4 -1 39.58 2.38 2
 9 -4 -1 44.04 4.65 4
 -9 4 1 -63.29 96.49 5
 -9 4 1 35.24 2.75 3
 -9 4 1 42.55 2.52 1
 -9 4 1 34.82 2.59 1
 -9 4 1 76.39 88.97 5
 8 -4 -1 180.87 9.91 4
 -8 4 1 141.17 86.96 5
 -8 4 1 158.64 8.74 1
 -8 4 1 286.21 82.39 5
 -8 4 1 174.88 8.26 3
 7 -4 -1 123.57 5.33 2
 7 -4 -1 113.56 7.22 4
 -7 4 1 204 70.51 5
 -7 4 1 21.41 63.99 5
 -7 4 1 111.39 6.26 1
 -7 4 1 127.38 6.08 3
 6 -4 -1 239.04 9.74 2
 -6 4 1 220.07 11.63 1
 -6 4 1 241.42 10.82 3
 -6 4 1 153.84 60.56 5
 5 -4 -1 108.01 5.37 3
 5 -4 -1 68.46 51.51 5
 5 -4 -1 115.2 4.81 2
 -5 4 1 123.08 55.8 5
 -5 4 1 103.15 5.65 1
 -5 4 1 111.06 5.47 3
 4 -4 -1 78.98 3.98 3
 4 -4 -1 152.04 63.29 5
 4 -4 -1 78.37 3.46 2
 -4 4 1 70.91 4.07 1
 -4 4 1 78.61 4.07 3
 -4 4 1 79.47 3.41 2
 -4 4 1 141.57 53.81 5
 3 -4 -1 567.32 24.84 3
 3 -4 -1 524.41 27.6 1
 3 -4 -1 574.07 22.76 2
 3 -4 -1 695.08 94.62 5
 -3 4 1 591.12 24.9 3
 -3 4 1 568.26 27.5 1
 -3 4 1 619.1 93.96 5
 2 -4 -1 415.63 18.7 3
 2 -4 -1 545.3 84.64 5
 2 -4 -1 407.01 20.77 1
 2 -4 -1 418.39 17.05 2
 -2 4 1 430.03 18.76 3
 -2 4 1 429.96 17.04 2
 -2 4 1 402.17 67.01 5
 -2 4 1 439.97 20.68 1
 1 -4 -1 175.48 38.14 5
 1 -4 -1 173.93 8.42 1
 1 -4 -1 166.54 6.78 2
 1 -4 -1 165.85 8.34 4
 -1 4 1 163.13 6.75 2
 -1 4 1 156.52 7.7 3
 -1 4 1 198.06 42.67 5
 -1 4 1 171.86 8.32 1
 0 -4 -1 224.71 11.19 4
 0 -4 -1 216.85 9.22 2
 0 -4 -1 312.84 60.78 5
 0 -4 -1 244.63 11.45 1
 0 4 1 245.05 11.4 1
 0 4 1 216.04 11.13 4
 0 4 1 228.21 9.2 2
 0 4 1 235.64 10.42 3
 0 4 1 199.91 55.69 5
 -1 -4 -1 30.31 2.2 4
 -1 -4 -1 37.86 2.16 1
 -1 -4 -1 22.83 21.48 5
 1 4 1 37.44 2.13 3
 1 4 1 35 2.23 4
 1 4 1 53.75 30.67 5
 -2 -4 -1 -19.03 17.31 5
 -2 -4 -1 17.91 1.31 3
 -2 -4 -1 18.86 1.69 4
 -2 -4 -1 16.85 1.32 1
 2 4 1 18.24 1.56 4
 2 4 1 26.03 22.52 5
 2 4 1 17.1 0.78 2
 2 4 1 18.77 1.37 3
 2 4 1 16.88 1.38 1
 -3 -4 -1 414.09 72.25 5
 -3 -4 -1 299.87 15.13 4
 -3 -4 -1 302.85 12.33 2
 -3 -4 -1 309.25 15.2 1
 3 4 1 311.67 65.39 5
 3 4 1 296.93 15.02 4
 3 4 1 312.8 13.67 3
 3 4 1 315.21 12.31 2
 -4 -4 -1 522.12 26.41 4
 -4 -4 -1 530.15 21.87 2
 -4 -4 -1 583.97 84.5 5
 4 4 1 345.18 63.47 5
 4 4 1 540.54 23.9 3
 4 4 1 563.21 21.86 2
 4 4 1 591.79 26.41 4
 4 4 1 546.3 26.84 1
 -5 -4 -1 293.89 78.71 5
 5 4 1 182.6 70.66 5
 5 4 1 216.22 11.26 4
 5 4 1 222.75 8.92 2
 5 4 1 205.75 11.16 1
 5 4 1 225.01 9.96 3
 -6 -4 -1 43.36 2.11 2
 -6 -4 -1 52.23 57.23 5
 6 4 1 43.81 2.65 3
 6 4 1 45.4 3.44 4
 6 4 1 41.07 2.92 1
 6 4 1 7.97 43.07 5
 6 4 1 45.36 2.14 2
 -7 -4 -1 -59.31 58.24 5
 7 4 1 10.03 2.02 4
 7 4 1 59.37 47.76 5
 7 4 1 15.15 1.53 3
 7 4 1 15.81 1.16 2
 -8 -4 -1 45.85 85.12 5
 8 4 1 -125.25 69.53 5
 8 4 1 3.8 1.7 4
 8 4 1 -0.3 0.54 2
 8 4 1 0.85 0.83 3
 -9 -4 -1 125.76 108.88 5
 9 4 1 -45.12 52.38 5
 9 4 1 65.11 3.14 2
 9 4 1 61.82 4.96 4
 9 4 1 61.91 3.58 3
 -10 -4 -1 53.72 95.76 5
 10 4 1 60.44 75.27 5
 -11 -4 -1 81.53 140.81 5
 11 4 1 98.33 107.92 5
 -12 -4 -1 -156.18 140.94 5
 12 4 1 102.8 4.93 2
 12 4 1 106.37 5.47 3
 12 4 1 110.61 7.49 4
 12 4 1 72.45 122.63 5
 -13 -4 -1 -438.88 150.13 5
 13 4 1 170.14 109.14 5
 14 4 1 -0.81 0.99 3
 14 4 1 -0.83 0.92 2
 14 4 1 -3.51 1.86 4
 14 4 1 -90.34 190.61 5
 -15 -4 -1 127.9 246.43 5
 15 4 1 25 160.49 5
 16 4 1 1.89 2.64 4
 16 4 1 0.8 1.12 2
 16 4 1 -0.67 0.96 3
 16 -5 -1 19.14 2.1 2
 16 -5 -1 28.77 4.31 4
 15 -5 -1 -2.56 1.78 2
 15 -5 -1 2.46 2.59 4
 -15 5 1 527.7 246.97 5
 -15 5 1 -51.13 200.94 5
 14 -5 -1 55.33 6.12 4
 14 -5 -1 62.99 3.57 2
 -14 5 1 49.07 172.03 5
 -14 5 1 23.53 253.37 5
 -13 5 1 138.19 177.35 5
 -13 5 1 172.28 151.06 5
 -12 5 1 64.02 134.48 5
 -12 5 1 131 150.29 5
 11 -5 -1 0.05 2.13 4
 11 -5 -1 1.04 0.97 2
 -11 5 1 2.94 0.6 1
 -11 5 1 -185.88 96.41 5
 -11 5 1 0.82 0.79 1
 -11 5 1 62.37 114.04 5
 10 -5 -1 56.35 3.04 2
 10 -5 -1 52.24 5.06 4
 -10 5 1 46.76 3.11 1
 -10 5 1 78.53 98.86 5
 -10 5 1 54.97 2.82 1
 -10 5 1 54.26 3.54 3
 -10 5 1 22.04 107.29 5
 9 -5 -1 123.53 5.37 2
 9 -5 -1 111.65 7.56 4
 -9 5 1 178.72 98.44 5
 -9 5 1 112.28 5.8 1
 -9 5 1 158.41 138.33 5
 -9 5 1 121.23 6.11 3
 -9 5 1 109.11 6.03 1
 8 -5 -1 20.26 2.9 4
 8 -5 -1 17.29 1.59 2
 -8 5 1 33.89 73.9 5
 -8 5 1 20.59 2.21 3
 -8 5 1 18.48 1.55 1
 -8 5 1 99.19 99.03 5
 -7 5 1 -5.85 63.6 5
 -7 5 1 -72.08 64.54 5
 6 -5 -1 359.75 14.23 2
 -6 5 1 332.6 16.95 1
 -6 5 1 342.64 15.7 3
 -6 5 1 532.68 107.96 5
 5 -5 -1 16.29 1.22 2
 5 -5 -1 5.33 49.51 5
 -5 5 1 75.23 47.22 5
 -5 5 1 15.19 1.76 3
 -5 5 1 13.92 1.22 1
 4 -5 -1 210.26 11.34 1
 4 -5 -1 193.71 63.13 5
 -4 5 1 349.81 77.57 5
 -4 5 1 225.18 10.5 3
 -4 5 1 240.54 9.48 2
 -4 5 1 227.75 11.18 1
 3 -5 -1 119.24 4.92 2
 3 -5 -1 104.67 6.04 1
 3 -5 -1 57.16 39.56 5
 3 -5 -1 115.34 5.89 3
 -3 5 1 114.64 48.61 5
 -3 5 1 120.98 5.9 1
 -3 5 1 116.51 4.89 2
 -3 5 1 118 5.78 3
 2 -5 -1 1207.72 58.24 1
 2 -5 -1 1160.06 52.07 3
 2 -5 -1 1018.56 113.13 5
 2 -5 -1 1192.49 47.93 2
 -2 5 1 1184.1 47.92 2
 -2 5 1 1218.02 118.93 5
 -2 5 1 1251.99 58.09 1
 -2 5 1 1243.38 52.17 3
 1 -5 -1 174.41 6.97 2
 1 -5 -1 161.6 7.96 3
 1 -5 -1 262.6 56.2 5
 1 -5 -1 173.07 8.56 4
 1 -5 -1 170.87 8.7 1
 -1 5 1 180.63 8.6 1
 -1 5 1 164.62 6.95 2
 -1 5 1 170.88 8.08 3
 0 -5 -1 57.88 31.47 5
 0 -5 -1 77.41 4.16 3
 0 -5 -1 82.66 4.52 4
 0 -5 -1 80.91 4.48 1
 0 -5 -1 81.74 3.41 2
 0 5 1 86.4 3.39 2
 0 5 1 82.96 4.41 1
 0 5 1 84.18 4.49 4
 0 5 1 83.19 4.28 3
 -1 -5 -1 52.74 2.98 1
 -1 -5 -1 80.98 40.36 5
 -1 -5 -1 46.54 2.8 3
 -1 -5 -1 49.48 3.13 4
 1 5 1 51.24 3.05 4
 1 5 1 54.79 2.99 1
 1 5 1 52.1 2.92 3
 -2 -5 -1 465.81 21.31 3
 -2 -5 -1 502.27 82.09 5
 -2 -5 -1 451.22 23.31 4
 -2 -5 -1 524.78 23.98 1
 2 5 1 480.82 23.19 4
 2 5 1 491.63 21.37 3
 2 5 1 662.95 103.73 5
 -3 -5 -1 862.43 35.12 2
 -3 -5 -1 1062.65 136.14 5
 -3 -5 -1 854.55 38.33 3
 3 5 1 919.54 43 1
 3 5 1 835.7 41.77 4
 3 5 1 908.11 35.09 2
 3 5 1 917.87 102.83 5
 3 5 1 896.15 38.36 3
 -4 -5 -1 116.29 50.66 5
 -4 -5 -1 22.23 1.15 2
 4 5 1 21.59 1.89 1
 4 5 1 22.1 2.33 4
 4 5 1 22.61 1.75 3
 4 5 1 23.12 1.14 2
 4 5 1 2.18 37.88 5
 -5 -5 -1 1.7 0.44 2
 -5 -5 -1 -19.93 50.27 5
 5 5 1 0.1 0.83 1
 5 5 1 0.26 0.83 3
 5 5 1 0.39 1.06 4
 5 5 1 -53.67 39.36 5
 5 5 1 0.15 0.39 2
 -6 -5 -1 84.46 3.83 2
 -6 -5 -1 139.73 70.29 5
 6 5 1 64.48 48.1 5
 6 5 1 88.2 5.48 4
 6 5 1 93.79 4.6 3
 6 5 1 91.42 3.86 2
 6 5 1 84.22 5.12 1
 -7 -5 -1 113.61 79.26 5
 7 5 1 108.13 4.67 2
 7 5 1 -23.71 67.03 5
 7 5 1 102.03 6.45 4
 7 5 1 109.97 5.38 3
 8 5 1 1.62 0.95 3
 8 5 1 1.37 0.65 2
 8 5 1 6.52 67.87 5
 8 5 1 2.09 1.55 4
 -9 -5 -1 75.95 101.73 5
 9 5 1 16.29 1.74 3
 9 5 1 15.55 1.33 2
 9 5 1 -56.62 77.27 5
 9 5 1 10.25 2.29 4
 -10 -5 -1 37.01 130.98 5
 10 5 1 -54.62 87.88 5
 10 5 1 15.18 2.86 4
 -11 -5 -1 58.49 121.17 5
 11 5 1 10.38 127.11 5
 11 5 1 25.83 2.26 3
 11 5 1 23.63 1.84 2
 11 5 1 26.96 3.59 4
 -12 -5 -1 -38.51 170.59 5
 12 5 1 13.4 1.72 2
 12 5 1 87.79 107.76 5
 12 5 1 15.04 3.13 4
 12 5 1 15.4 1.76 3
 -13 -5 -1 -136.09 193.11 5
 13 5 1 1.24 1.08 3
 13 5 1 -1.86 118.17 5
 13 5 1 1.41 1.05 2
 13 5 1 1.84 2.31 4
 -14 -5 -1 -9.04 203.81 5
 14 5 1 200.85 220.09 5
 14 5 1 42.51 4.88 4
 14 5 1 42.06 2.67 2
 14 5 1 37.54 2.75 3
 15 5 1 8.19 1.4 3
 15 5 1 12.16 1.55 2
 15 5 1 8.24 2.76 4
 16 5 1 -0.47 1.02 3
 16 5 1 0.17 1.03 2
 16 5 1 -4.31 2.15 4
 16 -6 -1 20.8 2.18 2
 16 -6 -1 14.42 3.6 4
 -15 6 1 260.71 218.09 5
 14 -6 -1 3.19 2.59 4
 -14 6 1 16 174.59 5
 -14 6 1 442.85 206.56 5
 -13 6 1 251.57 169.33 5
 -13 6 1 105 148.79 5
 12 -6 -1 1.21 1.11 2
 12 -6 -1 2.76 2.57 4
 -12 6 1 -24.91 145.3 5
 -12 6 1 -39.01 137.41 5
 -11 6 1 55.35 112.32 5
 -11 6 1 113.67 123.13 5
 10 -6 -1 117.74 5.62 2
 10 -6 -1 120.92 8.61 4
 -10 6 1 26.15 99.83 5
 -10 6 1 232.47 138.92 5
 -10 6 1 125.2 6.48 3
 9 -6 -1 107.54 7.14 4
 9 -6 -1 102.79 4.81 2
 -9 6 1 100 5.16 1
 -9 6 1 110.21 93.52 5
 -9 6 1 94.52 5.04 1
 -9 6 1 89.05 87.47 5
 -9 6 1 109.67 5.65 3
 8 -6 -1 607.47 24.53 2
 -8 6 1 677.34 139.33 5
 -8 6 1 613.67 26.92 3
 -8 6 1 585.72 29.21 1
 -8 6 1 629.29 141.12 5
 7 -6 -1 157 6.79 2
 -7 6 1 155.65 7.8 1
 -7 6 1 155.24 7.82 3
 -7 6 1 306.5 107.17 5
 -7 6 1 119.86 90.43 5
 6 -6 -1 3.58 0.81 2
 6 -6 -1 64.56 64.04 5
 -6 6 1 -58.7 55.98 5
 -6 6 1 6.74 0.82 1
 -6 6 1 3.66 1.17 3
 5 -6 -1 397.24 16 2
 5 -6 -1 362.62 19.35 1
 5 -6 -1 435.82 95.71 5
 -5 6 1 422.08 19.15 1
 -5 6 1 385.03 17.75 3
 -5 6 1 299.73 81.72 5
 4 -6 -1 661.29 112.13 5
 4 -6 -1 778.68 30.97 2
 4 -6 -1 706.43 37.57 1
 -4 6 1 807.98 33.96 3
 -4 6 1 792.56 37.36 1
 -4 6 1 997.99 146.65 5
 3 -6 -1 295.61 11.86 2
 3 -6 -1 267.92 14.51 1
 3 -6 -1 329.3 81.31 5
 -3 6 1 311.55 14.33 1
 -3 6 1 292.37 13.37 3
 -3 6 1 267.47 69.01 5
 -3 6 1 284.46 11.83 2
 2 -6 -1 258.34 64.65 5
 2 -6 -1 177.94 7.45 2
 -2 6 1 176.62 8.63 3
 -2 6 1 177.56 7.43 2
 -2 6 1 188.71 9.1 1
 -2 6 1 304.97 69.23 5
 1 -6 -1 182.63 7.71 2
 1 -6 -1 157.21 47.62 5
 1 -6 -1 182.62 9.63 1
 -1 6 1 195.24 9.33 3
 -1 6 1 201.09 9.56 1
 -1 6 1 188.46 7.7 2
 0 -6 -1 568.97 28.26 1
 0 -6 -1 503.49 85.63 5
 0 -6 -1 571.83 23.02 2
 0 6 1 584.09 27.52 4
 0 6 1 563.66 23 2
 0 6 1 603.28 28.23 1
 -1 -6 -1 34.22 38.04 5
 1 6 1 20.05 1.64 1
 1 6 1 20.74 1.84 4
 -2 -6 -1 1761.4 147.9 5
 2 6 1 1747.55 74.43 3
 2 6 1 1348.5 184.7 5
 -3 -6 -1 23.62 31.21 5
 3 6 1 17.54 1.61 3
 3 6 1 39.03 42.11 5
 3 6 1 17.96 1.71 1
 3 6 1 16.43 1.82 4
 -4 -6 -1 500 20.5 2
 -4 -6 -1 594.22 105.79 5
 4 6 1 515.98 22.7 3
 4 6 1 543.66 24.9 4
 4 6 1 506.59 20.48 2
 4 6 1 495.11 25.38 1
 4 6 1 505.56 99.74 5
 -5 -6 -1 68.57 52.16 5
 -5 -6 -1 8.29 0.71 2
 5 6 1 8.81 0.71 2
 5 6 1 -31.34 34.43 5
 5 6 1 8.13 1.36 3
 5 6 1 8.69 1.67 4
 5 6 1 9.13 1.51 1
 -6 -6 -1 -26.7 60.2 5
 6 6 1 -67.59 47.15 5
 -7 -6 -1 -69.88 72.47 5
 7 6 1 49.3 62.78 5
 -8 -6 -1 46.51 86 5
 8 6 1 23.67 2.11 3
 8 6 1 -5.95 63.9 5
 8 6 1 24.61 3.08 4
 8 6 1 18.72 1.42 2
 -9 -6 -1 59.55 104.86 5
 9 6 1 113.65 107.3 5
 -10 -6 -1 -68.91 116.8 5
 10 6 1 1.89 0.81 2
 10 6 1 1.39 2.18 4
 10 6 1 -54.01 90.09 5
 10 6 1 0.92 1.14 3
 -11 -6 -1 66.85 131.56 5
 11 6 1 -7.02 117.73 5
 -12 -6 -1 -19.82 154.2 5
 12 6 1 -77.6 90.63 5
 -13 -6 -1 -30.36 178.54 5
 13 6 1 6.21 1.23 2
 13 6 1 5.89 2.42 4
 13 6 1 7.04 1.45 3
 13 6 1 -39.93 143.63 5
 -14 -6 -1 -103.96 210.45 5
 14 6 1 32.71 2.41 2
 14 6 1 126.34 197.75 5
 14 6 1 34.86 2.55 3
 14 6 1 36.73 4.59 4
 15 6 1 3 3.36 4
 15 6 1 -1.69 0.92 3
 15 6 1 -0.9 0.97 2
 16 -7 -1 0.61 2.35 4
 16 -7 -1 -0.4 1.07 2
 15 -7 -1 -2.4 2.41 4
 15 -7 -1 -0.19 1.13 2
 -14 7 1 -22.51 195.77 5
 13 -7 -1 4.28 2.69 4
 13 -7 -1 1.01 1.06 2
 -13 7 1 -35.93 159.89 5
 -13 7 1 152.3 148.5 5
 12 -7 -1 66.13 3.75 2
 12 -7 -1 78 6.4 4
 -12 7 1 67.98 4.41 3
 -12 7 1 9.52 164.54 5
 -12 7 1 48.27 131.45 5
 11 -7 -1 7.04 2.7 4
 11 -7 -1 -0.13 0.97 2
 -11 7 1 -74.84 137.17 5
 -11 7 1 -158.13 115.19 5
 -11 7 1 2.43 1.37 3
 -10 7 1 27.96 127.94 5
 -10 7 1 -49.62 101.48 5
 9 -7 -1 5.84 1.16 2
 -9 7 1 7.24 1.65 3
 -9 7 1 -25.07 92.38 5
 -9 7 1 -25.89 79.37 5
 8 -7 -1 93.89 4.54 2
 -8 7 1 98.9 5.51 3
 -8 7 1 213.25 103.25 5
 -8 7 1 151.88 86.21 5
 -7 7 1 -19.2 72.72 5
 6 -7 -1 63.25 65.46 5
 6 -7 -1 126.78 5.6 2
 -6 7 1 128.28 6.41 1
 -6 7 1 127.5 6.64 3
 -6 7 1 165.44 85.87 5
 5 -7 -1 76.38 71.08 5
 5 -7 -1 33.35 2.32 1
 5 -7 -1 34.9 1.92 2
 -5 7 1 24.71 65.69 5
 -5 7 1 33.25 2.58 3
 -5 7 1 33.42 2.01 1
 4 -7 -1 197.84 68.89 5
 4 -7 -1 255.36 10.19 2
 4 -7 -1 223.47 12.43 1
 -4 7 1 258.9 12.19 1
 -4 7 1 436.02 96.04 5
 -4 7 1 243.49 11.61 3
 3 -7 -1 8.25 1.24 1
 3 -7 -1 9.41 0.93 2
 3 -7 -1 30.29 55.89 5
 -3 7 1 9.62 1.51 3
 -3 7 1 103.59 56.67 5
 -3 7 1 8.87 0.85 2
 -3 7 1 12.81 1.11 1
 2 -7 -1 635 33.42 1
 2 -7 -1 691.29 27.38 2
 2 -7 -1 735.23 115 5
 -2 7 1 715.58 33.28 1
 -2 7 1 677.46 27.36 2
 -2 7 1 695.17 30.25 3
 1 -7 -1 15.91 1.78 1
 1 -7 -1 108.2 54.34 5
 1 -7 -1 14.6 0.88 2
 -1 7 1 13.47 0.83 2
 -1 7 1 18.78 1.93 3
 0 -7 -1 386.2 78.72 5
 0 -7 -1 419.12 17.18 2
 0 7 1 466.01 21.26 1
 0 7 1 407.67 20.75 4
 0 7 1 421.47 17.17 2
 0 7 1 439.57 19.4 3
 -1 -7 -1 9.2 45.05 5
 1 7 1 22.25 1.93 4
 1 7 1 16.67 1.67 1
 1 7 1 15.35 1.76 3
 -2 -7 -1 325.16 76.91 5
 2 7 1 334.88 16.8 4
 2 7 1 351.42 17.21 1
 2 7 1 343.13 15.61 3
 -3 -7 -1 -18.3 38.5 5
 3 7 1 9.17 1.5 1
 3 7 1 6.66 1.37 4
 3 7 1 9.96 1.47 3
 3 7 1 17.33 39.7 5
 -4 -7 -1 90.24 53.93 5
 4 7 1 65.4 4.25 4
 4 7 1 73.65 3.95 3
 4 7 1 65.66 4.22 1
 4 7 1 42.28 47.29 5
 -5 -7 -1 89.59 74.64 5
 -5 -7 -1 9.85 0.8 2
 5 7 1 14.4 1.92 4
 5 7 1 10.98 1.81 1
 5 7 1 11.33 1.55 3
 5 7 1 10.94 0.79 2
 5 7 1 7.29 52.52 5
 -6 -7 -1 61.87 84.35 5
 6 7 1 14.13 1.76 3
 6 7 1 -31.52 55.11 5
 6 7 1 12.89 0.94 2
 6 7 1 11.54 1.8 1
 6 7 1 8.57 1.8 4
 -7 -7 -1 120.14 92.16 5
 -7 -7 -1 57.94 2.74 2
 7 7 1 184.32 103.69 5
 7 7 1 49.41 3.97 1
 7 7 1 62.78 4.43 4
 7 7 1 63.7 2.78 2
 7 7 1 59.52 3.57 3
 -8 -7 -1 90.57 91.48 5
 8 7 1 73.33 4.14 3
 8 7 1 74.45 3.36 2
 8 7 1 65.83 5.01 4
 8 7 1 57.16 64.63 5
 -9 -7 -1 -79.25 189.8 5
 9 7 1 3.37 1.15 3
 9 7 1 1.46 0.75 2
 9 7 1 64.7 100.73 5
 9 7 1 1.92 1.67 4
 -10 -7 -1 54.22 131.96 5
 10 7 1 74.68 4.25 3
 10 7 1 75.69 5.57 4
 10 7 1 69.05 3.53 2
 10 7 1 269.36 128.47 5
 -11 -7 -1 14.09 167.21 5
 11 7 1 134.95 109.81 5
 -12 -7 -1 -149.78 148.83 5
 12 7 1 -44.35 129.34 5
 -13 -7 -1 -57.08 180 5
 13 7 1 131.17 155.77 5
 14 7 1 12.88 1.58 2
 14 7 1 11.13 1.56 3
 14 7 1 13.69 3.1 4
 15 7 1 1.32 2.35 4
 15 7 1 1.88 1.04 2
 15 7 1 0.23 1.13 3
 15 -8 -1 0.09 1.1 2
 15 -8 -1 -0.36 2.58 4
 -14 8 1 168.93 237.06 5
 13 -8 -1 15.4 3.59 4
 -13 8 1 -167.2 189.48 5
 -13 8 1 -391.52 226.06 5
 12 -8 -1 1.56 1.1 2
 12 -8 -1 1.25 2.46 4
 -12 8 1 -25.99 160.06 5
 -12 8 1 -0.33 1.4 3
 -12 8 1 10.49 150.49 5
 -11 8 1 139.72 156.36 5
 -11 8 1 200.73 170.13 5
 10 -8 -1 13.9 1.59 2
 -10 8 1 -22.98 123.39 5
 -10 8 1 152.06 113.56 5
 -10 8 1 20.39 2.52 3
 -9 8 1 115.52 106.72 5
 -9 8 1 -28.56 113.42 5
 -9 8 1 11.96 2.03 3
 8 -8 -1 43.43 2.53 2
 -8 8 1 -15.92 109.87 5
 -8 8 1 41.6 3.4 3
 -8 8 1 71.94 83.3 5
 7 -8 -1 132.17 88.88 5
 7 -8 -1 103.51 4.99 2
 -7 8 1 110.82 6.09 3
 -7 8 1 113.95 5.54 1
 -7 8 1 124.97 96.55 5
 6 -8 -1 76.22 4.5 1
 6 -8 -1 42.74 84.37 5
 6 -8 -1 81.63 3.83 2
 -6 8 1 83.77 4.21 1
 -6 8 1 17.28 71.31 5
 -6 8 1 80.87 4.79 3
 5 -8 -1 49.74 2.62 2
 5 -8 -1 29.59 74.94 5
 5 -8 -1 51.08 3.66 1
 -5 8 1 80.67 77.83 5
 -5 8 1 53.22 3.53 3
 -5 8 1 53.42 2.91 1
 4 -8 -1 -88.46 57.05 5
 4 -8 -1 0.13 0.72 1
 4 -8 -1 1.72 0.61 2
 -4 8 1 -94.77 53.45 5
 -4 8 1 1.35 0.63 1
 -4 8 1 1.22 1.18 3
 3 -8 -1 497.36 27.29 1
 3 -8 -1 579.88 22.35 2
 3 -8 -1 421.81 92.77 5
 -3 8 1 661.11 163.9 5
 -3 8 1 596.52 27.13 1
 -3 8 1 534.62 22.32 2
 -3 8 1 568.82 24.92 3
 2 -8 -1 218.18 74.53 5
 2 -8 -1 296.54 12.07 2
 -2 8 1 315.64 14.82 1
 -2 8 1 278.94 12.05 2
 -2 8 1 301.54 13.87 3
 1 -8 -1 28.01 1.38 2
 1 -8 -1 -19.86 48.7 5
 -1 8 1 29.42 2.11 1
 -1 8 1 26.86 1.34 2
 -1 8 1 25.72 2.35 3
 0 -8 -1 492.18 85.09 5
 0 8 1 334.92 16.53 1
 0 8 1 321.01 15.2 3
 -1 -8 -1 299.54 71.97 5
 1 8 1 339.49 16.54 1
 1 8 1 323.56 15.12 3
 1 8 1 323.57 16.19 4
 -2 -8 -1 133.2 62.07 5
 2 8 1 142.81 7.01 3
 2 8 1 132.79 7.37 4
 2 8 1 138.78 7.48 1
 -3 -8 -1 277.17 86.46 5
 3 8 1 196.11 9.31 3
 3 8 1 183.88 9.96 4
 3 8 1 197.46 10.18 1
 -4 -8 -1 -14.04 52.66 5
 4 8 1 7.79 1.58 1
 4 8 1 8.81 1.68 4
 4 8 1 -56.51 51.77 5
 -5 -8 -1 36.09 57.02 5
 5 8 1 13.42 2 4
 5 8 1 2.94 56 5
 5 8 1 9.34 1.55 3
 5 8 1 7.88 1.49 1
 -6 -8 -1 92.92 70.03 5
 6 8 1 126.65 7.26 4
 6 8 1 116.8 7.12 1
 6 8 1 68.62 83.01 5
 6 8 1 130.62 6.43 3
 6 8 1 126.03 5.22 2
 -7 -8 -1 66.42 88.57 5
 7 8 1 -9.74 64.71 5
 7 8 1 3.5 1.2 3
 7 8 1 1.87 1.25 1
 7 8 1 1.5 1.49 4
 -8 -8 -1 27.53 93.35 5
 8 8 1 4.32 1.29 3
 8 8 1 4.16 0.77 2
 8 8 1 5.72 1.86 4
 8 8 1 4.33 82.85 5
 -9 -8 -1 -111 108.57 5
 9 8 1 125.97 7.74 4
 9 8 1 136.29 6.6 3
 9 8 1 196.79 118.33 5
 9 8 1 121.96 5.51 2
 -10 -8 -1 8.11 128.83 5
 10 8 1 -132.03 132.61 5
 -11 -8 -1 71.91 144.01 5
 11 8 1 22.57 90.72 5
 -12 -8 -1 -209.09 162.84 5
 12 8 1 -1.13 1.7 4
 12 8 1 1.09 0.83 2
 12 8 1 0.31 1.1 3
 12 8 1 -50.73 107.93 5
 13 8 1 3.45 1.05 2
 13 8 1 2.22 1.41 3
 13 8 1 -41.58 189.89 5
 13 8 1 3.49 2.34 4
 14 8 1 31.42 4.05 4
 14 8 1 22.66 2.23 3
 14 8 1 26.76 2.12 2
 15 -9 -1 0.52 1.15 2
 15 -9 -1 2.36 2.88 4
 14 -9 -1 10.27 3.51 4
 14 -9 -1 5.71 1.43 2
 13 -9 -1 21.65 4.07 4
 -13 9 1 -106.31 188.85 5
 -12 9 1 115.58 193.53 5
 -12 9 1 388.92 176.33 5
 -11 9 1 28.03 135.04 5
 -11 9 1 28.4 143.96 5
[truncated: 1,269,241 more chars]
